# Supplementary material for: The CINSARC signature predicts the clinical outcome in patients with Luminal B breast cancer
Source: PubMed Central journal article supplement (PMC8099860; doi:10.1038/s41523-021-00256-2), 2021-05-05
Supplement: 41523_2021_256_MOESM1_ESM.pdf [file 41523_2021_256_MOESM1_ESM.pdf]

**Supplementary Table 1: Clinicopathological characteristics of 6,035 patients and tumor**

| <b>Characteristics</b>                  | <b>All breast cancers<br/>N (%)</b> | <b>Luminal B subtype<br/>N (%)</b> |
|-----------------------------------------|-------------------------------------|------------------------------------|
| Patients' age                           |                                     |                                    |
| ≤ 50                                    | 1584 (34%)                          | 283 (25%)                          |
| > 50                                    | 3123 (66%)                          | 843 (75%)                          |
| Pathological tumor type                 |                                     |                                    |
| ductal                                  | 2770 (77%)                          | 723 (81%)                          |
| lobular                                 | 397 (11%)                           | 76 (8%)                            |
| other                                   | 435 (12%)                           | 96 (11%)                           |
| Pathological grade                      |                                     |                                    |
| 1                                       | 548 (14%)                           | 65 (7%)                            |
| 2                                       | 1623 (40%)                          | 427 (46%)                          |
| 3                                       | 1847 (46%)                          | 446 (47%)                          |
| Pathological axillary lymph node status |                                     |                                    |
| negative                                | 2984 (58%)                          | 676 (55%)                          |
| positive                                | 2181 (42%)                          | 545 (45%)                          |
| Pathological tumor size                 |                                     |                                    |
| pT1                                     | 1878 (40%)                          | 398 (35%)                          |
| pT2                                     | 2443 (52%)                          | 664 (58%)                          |
| pT3                                     | 398 (8%)                            | 91 (7%)                            |
| Adjuvant chemotherapy                   |                                     |                                    |
| no                                      | 3185 (72%)                          | 880 (79%)                          |
| yes                                     | 1257 (28%)                          | 230 (21%)                          |
| Adjuvant hormone therapy                |                                     |                                    |
| no                                      | 2488 (57%)                          | 457 (41%)                          |
| yes                                     | 1894 (43%)                          | 647 (59%)                          |
| Follow-up median, months (min-max)      | 77 (1-382)                          | 68 (1-294)                         |
| DFS event (%)                           | 1759 (29%)                          | 473 (38%)                          |
| 5-year DFS                              | 75% [74-76]                         | 73% [71-76]                        |



**Supplementary Table 2: Correlations of CINSARC classes with clinicopathological characteristics in Luminal A breast cancer patients**

| Characteristics                         | N    | CINSARC classes |             | p-value         |
|-----------------------------------------|------|-----------------|-------------|-----------------|
|                                         |      | Low-risk        | High-risk   |                 |
| Patients' age                           |      |                 |             | 0.211           |
| ≤ 50                                    | 401  | 360 (29%)       | 41 (35%)    |                 |
| > 50                                    | 967  | 890 (71%)       | 77 (65%)    |                 |
| Pathological tumor type                 |      |                 |             | 0.938           |
| ductal                                  | 700  | 642 (69%)       | 58 (67%)    |                 |
| lobular                                 | 164  | 149 (16%)       | 15 (17%)    |                 |
| other                                   | 155  | 142 (15%)       | 13 (15%)    |                 |
| Pathological grade                      |      |                 |             | <b>7.60E-05</b> |
| 1                                       | 335  | 317 (31%)       | 18 (17%)    |                 |
| 2                                       | 604  | 550 (53%)       | 54 (51%)    |                 |
| 3                                       | 206  | 172 (17%)       | 34 (32%)    |                 |
| Pathological axillary lymph node status |      |                 |             | 0.305           |
| negative                                | 919  | 846 (62%)       | 73 (57%)    |                 |
| positive                                | 583  | 527 (38%)       | 56 (43%)    |                 |
| Pathological tumor size                 |      |                 |             | <b>4.01E-02</b> |
| pT1                                     | 682  | 636 (50%)       | 46 (38%)    |                 |
| pT2                                     | 602  | 538 (43%)       | 64 (53%)    |                 |
| pT3                                     | 97   | 87 (7%)         | 10 (8%)     |                 |
| Adjuvant chemotherapy                   |      |                 |             | 0.665           |
| no                                      | 1049 | 958 (82%)       | 91 (84%)    |                 |
| yes                                     | 226  | 209 (18%)       | 17 (16%)    |                 |
| Adjuvant hormone therapy                |      |                 |             | 0.687           |
| no                                      | 647  | 590 (51%)       | 57 (54%)    |                 |
| yes                                     | 611  | 562 (49%)       | 49 (46%)    |                 |
| Follow-up median, months (n)            | 1753 | 83 (1-382)      | 87 (1-281)  | <b>1.48E-03</b> |
| DFS event (%)                           | 1753 | 305 (19%)       | 46 (29%)    | <b>6.92E-03</b> |
| 5-year DFS                              | 1753 | 88% [86-89]     | 78% [72-86] | <b>3.31E-02</b> |

**Supplementary Table 3: Univariate and multivariate Cox regression analyses for DFS in Luminal A breast cancer**

| All patients                            |                        | Univariate |                  |                 | Multivariate |                  |                 |
|-----------------------------------------|------------------------|------------|------------------|-----------------|--------------|------------------|-----------------|
|                                         |                        | N          | HR [95%CI]       | p-value         | N            | HR [95%CI]       | p-value         |
| Patients' age                           | > 50 vs. ≤ 50          | 1368       | 1.30 [0.96-1.77] | <b>9.34E-02</b> | 934          | 1.13 [0.80-1.58] | 0.490           |
| Pathological tumor type                 | lobular vs. ductal     | 1019       | 1.32 [0.84-2.09] | 0.158           |              |                  |                 |
|                                         | other vs. ductal       |            | 0.73 [0.45-1.18] |                 |              |                  |                 |
| Pathological grade                      | 2 vs. 1                | 1145       | 1.08 [0.77-1.50] | <b>1.61E-02</b> | 934          | 1 [0.68-1.45]    | 0.979           |
|                                         | 3 vs. 1                |            | 1.66 [1.13-2.43] |                 | 934          | 1.32 [0.85-2.04] | 0.213           |
| Pathological axillary lymph node status | positive vs. negative  | 1502       | 1.41 [1.09-1.82] | <b>9.18E-03</b> | 934          | 1.09 [0.79-1.51] | 0.587           |
| Pathological tumor size                 | pT2 vs. pT1            | 1381       | 1.52 [1.16-2.01] | <b>1.19E-03</b> | 934          | 1.54 [1.12-2.13] | <b>8.66E-03</b> |
|                                         | pT3 vs. pT1            |            | 2.25 [1.28-3.96] |                 | 934          | 2.02 [0.96-4.25] | 0.064           |
| Adjuvant chemotherapy                   | yes vs. no             | 1275       | 0.82 [0.50-1.36] | 0.443           |              |                  |                 |
| Adjuvant hormone therapy                | yes vs. no             | 1258       | 1.00 [0.76-1.33] | 0.978           |              |                  |                 |
| CINSARC classes                         | High-risk vs. Low-risk | 1753       | 1.40 [1.03-1.91] | <b>3.40E-02</b> | 934          | 1.21 [0.77-1.91] | 0.398           |

  

| Patients with adjuvant HT and without adjuvant CT |                        | Univariate |                  |                 | Multivariate |            |         |
|---------------------------------------------------|------------------------|------------|------------------|-----------------|--------------|------------|---------|
|                                                   |                        | N          | HR [95%CI]       | p-value         | N            | HR [95%CI] | p-value |
| Patients' age                                     | > 50 vs. ≤ 50          | 493        | 1.13 [0.52-2.48] | 0.752           |              |            |         |
| Pathological tumor type                           | lobular vs. ductal     | 458        | 1.23 [0.58-2.59] | 0.479           |              |            |         |
|                                                   | other vs. ductal       |            | 0.66 [0.30-1.47] |                 |              |            |         |
| Pathological grade                                | 2 vs. 1                | 353        | 1.35 [0.64-2.85] | 0.117           |              |            |         |
|                                                   | 3 vs. 1                |            | 2.10 [0.97-4.58] |                 |              |            |         |
| Pathological axillary lymph node status           | positive vs. negative  | 515        | 1.41 [0.88-2.26] | 0.155           |              |            |         |
| Pathological tumor size                           | pT2 vs. pT1            | 492        | 1.77 [1.07-2.91] | <b>1.47E-02</b> |              |            |         |
|                                                   | pT3 vs. pT1            |            | 3.38 [1.29-8.83] |                 |              |            |         |
| CINSARC classes                                   | High-risk vs. Low-risk | 527        | 0.82 [0.36-1.90] | 0.648           |              |            |         |

**Supplementary Table 4: Comparison of frequency of mutations among the 387 genes mutated in at least 5/270 tested samples (TCGA) between the two CINSARC classes in Luminal B breast cancers.**

| Symbol   | CINSARC Low |           |               | CINSARC High |           |               | CINSARC High vs. Low |          |         |
|----------|-------------|-----------|---------------|--------------|-----------|---------------|----------------------|----------|---------|
|          | N tested    | N altered | Fq alteration | N tested     | N altered | Fq alteration | OR [95%CI]           | p-value* | q-value |
| PIK3CA   | 93          | 34        | 36.56%        | 177          | 51        | 28.81%        | 0.70 [0.45-1.10]     | 0.194    | 0.895   |
| TTN      | 93          | 14        | 15.05%        | 177          | 37        | 20.90%        | 1.49 [0.85-2.63]     | 0.245    | 0.895   |
| TP53     | 93          | 11        | 11.83%        | 177          | 35        | 19.77%        | 1.84 [1.00-3.39]     | 0.102    | 0.895   |
| GATA3    | 93          | 16        | 17.20%        | 177          | 32        | 18.08%        | 1.06 [0.61-1.85]     | 0.858    | 0.962   |
| CDH1     | 93          | 6         | 6.45%         | 177          | 14        | 7.91%         | 1.25 [0.54-2.86]     | 0.664    | 0.910   |
| CROCCP2  | 93          | 4         | 4.30%         | 177          | 14        | 7.91%         | 1.91 [0.73-4.98]     | 0.266    | 0.895   |
| MUC16    | 93          | 4         | 4.30%         | 177          | 14        | 7.91%         | 1.91 [0.73-4.98]     | 0.266    | 0.895   |
| MAP3K1   | 93          | 10        | 10.75%        | 177          | 12        | 6.78%         | 0.60 [0.29-1.26]     | 0.261    | 0.895   |
| MLL3     | 93          | 7         | 7.53%         | 177          | 12        | 6.78%         | 0.89 [0.40-2.01]     | 0.82     | 0.939   |
| MUC5B    | 93          | 5         | 5.38%         | 177          | 11        | 6.21%         | 1.17 [0.47-2.91]     | 0.782    | 0.910   |
| HMCN1    | 93          | 4         | 4.30%         | 177          | 10        | 5.65%         | 1.33 [0.49-3.61]     | 0.636    | 0.910   |
| FRG1B    | 93          | 2         | 2.15%         | 177          | 10        | 5.65%         | 2.72 [0.75-9.92]     | 0.202    | 0.895   |
| DYNC2H1  | 93          | 2         | 2.15%         | 177          | 9         | 5.08%         | 2.44 [0.66-8.98]     | 0.261    | 0.895   |
| HRNR     | 93          | 2         | 2.15%         | 177          | 9         | 5.08%         | 2.44 [0.66-8.98]     | 0.261    | 0.895   |
| MUC12    | 93          | 5         | 5.38%         | 177          | 8         | 4.52%         | 0.83 [0.32-2.18]     | 0.755    | 0.910   |
| NEB      | 93          | 5         | 5.38%         | 177          | 8         | 4.52%         | 0.83 [0.32-2.18]     | 0.755    | 0.910   |
| SYNE2    | 93          | 5         | 5.38%         | 177          | 8         | 4.52%         | 0.83 [0.32-2.18]     | 0.755    | 0.910   |
| MUC4     | 93          | 4         | 4.30%         | 177          | 8         | 4.52%         | 1.05 [0.38-2.95]     | 0.934    | 0.974   |
| PTEN     | 93          | 4         | 4.30%         | 177          | 8         | 4.52%         | 1.05 [0.38-2.95]     | 0.934    | 0.974   |
| ZFX4     | 93          | 4         | 4.30%         | 177          | 8         | 4.52%         | 1.05 [0.38-2.95]     | 0.934    | 0.974   |
| HUWE1    | 93          | 2         | 2.15%         | 177          | 8         | 4.52%         | 2.15 [0.58-8.05]     | 0.338    | 0.895   |
| RELN     | 93          | 1         | 1.08%         | 177          | 8         | 4.52%         | 4.36 [0.75-25.25]    | 0.169    | 0.895   |
| DMD      | 93          | 5         | 5.38%         | 177          | 7         | 3.95%         | 0.72 [0.27-1.94]     | 0.592    | 0.910   |
| FLG      | 93          | 5         | 5.38%         | 177          | 7         | 3.95%         | 0.72 [0.27-1.94]     | 0.592    | 0.910   |
| MAP2K4   | 93          | 5         | 5.38%         | 177          | 7         | 3.95%         | 0.72 [0.27-1.94]     | 0.592    | 0.910   |
| RYR3     | 93          | 4         | 4.30%         | 177          | 7         | 3.95%         | 0.92 [0.32-2.63]     | 0.891    | 0.974   |
| CDK12    | 93          | 1         | 1.08%         | 177          | 7         | 3.95%         | 3.79 [0.64-22.27]    | 0.216    | 0.895   |
| MYH11    | 93          | 1         | 1.08%         | 177          | 7         | 3.95%         | 3.79 [0.64-22.27]    | 0.216    | 0.895   |
| NCOR1    | 93          | 7         | 7.53%         | 177          | 6         | 3.39%         | 0.43 [0.17-1.10]     | 0.141    | 0.895   |
| OBSCN    | 93          | 7         | 7.53%         | 177          | 6         | 3.39%         | 0.43 [0.17-1.10]     | 0.141    | 0.895   |
| PCLO     | 93          | 6         | 6.45%         | 177          | 6         | 3.39%         | 0.51 [0.19-1.35]     | 0.254    | 0.895   |
| SPTA1    | 93          | 5         | 5.38%         | 177          | 6         | 3.39%         | 0.62 [0.22-1.71]     | 0.437    | 0.895   |
| FAM157B  | 93          | 4         | 4.30%         | 177          | 6         | 3.39%         | 0.78 [0.26-2.31]     | 0.707    | 0.910   |
| FAT3     | 93          | 4         | 4.30%         | 177          | 6         | 3.39%         | 0.78 [0.26-2.31]     | 0.707    | 0.910   |
| SPEN     | 93          | 4         | 4.30%         | 177          | 6         | 3.39%         | 0.78 [0.26-2.31]     | 0.707    | 0.910   |
| USH2A    | 93          | 4         | 4.30%         | 177          | 6         | 3.39%         | 0.78 [0.26-2.31]     | 0.707    | 0.910   |
| CHD6     | 93          | 3         | 3.23%         | 177          | 6         | 3.39%         | 1.05 [0.32-3.43]     | 0.943    | 0.974   |
| PRUNE2   | 93          | 3         | 3.23%         | 177          | 6         | 3.39%         | 1.05 [0.32-3.43]     | 0.943    | 0.974   |
| CADPS    | 93          | 2         | 2.15%         | 177          | 6         | 3.39%         | 1.60 [0.41-6.22]     | 0.571    | 0.910   |
| DNAH7    | 93          | 2         | 2.15%         | 177          | 6         | 3.39%         | 1.60 [0.41-6.22]     | 0.571    | 0.910   |
| FAT2     | 93          | 2         | 2.15%         | 177          | 6         | 3.39%         | 1.60 [0.41-6.22]     | 0.571    | 0.910   |
| LRP2     | 93          | 2         | 2.15%         | 177          | 6         | 3.39%         | 1.60 [0.41-6.22]     | 0.571    | 0.910   |
| RYR2     | 93          | 2         | 2.15%         | 177          | 6         | 3.39%         | 1.60 [0.41-6.22]     | 0.571    | 0.910   |
| TBX3     | 93          | 2         | 2.15%         | 177          | 6         | 3.39%         | 1.60 [0.41-6.22]     | 0.571    | 0.910   |
| DNHD1    | 93          | 1         | 1.08%         | 177          | 6         | 3.39%         | 3.23 [0.54-19.32]    | 0.281    | 0.895   |
| DNM1P46  | 93          | 1         | 1.08%         | 177          | 6         | 3.39%         | 3.23 [0.54-19.32]    | 0.281    | 0.895   |
| HIST1H3B | 93          | 1         | 1.08%         | 177          | 6         | 3.39%         | 3.23 [0.54-19.32]    | 0.281    | 0.895   |
| KALRN    | 93          | 1         | 1.08%         | 177          | 6         | 3.39%         | 3.23 [0.54-19.32]    | 0.281    | 0.895   |
| NRXN2    | 93          | 1         | 1.08%         | 177          | 6         | 3.39%         | 3.23 [0.54-19.32]    | 0.281    | 0.895   |
| SETDB1   | 93          | 1         | 1.08%         | 177          | 6         | 3.39%         | 3.23 [0.54-19.32]    | 0.281    | 0.895   |
| XIST     | 93          | 1         | 1.08%         | 177          | 6         | 3.39%         | 3.23 [0.54-19.32]    | 0.281    | 0.895   |
| FAM47C   | 93          | 0         | 0.00%         | 177          | 6         | 3.39%         | 3e+07 [0e+00-Inf]    | 0.993    | 0.993   |
| APOB     | 93          | 6         | 6.45%         | 177          | 5         | 2.82%         | 0.42 [0.15-1.17]     | 0.163    | 0.895   |
| DST      | 93          | 5         | 5.38%         | 177          | 5         | 2.82%         | 0.51 [0.18-1.48]     | 0.299    | 0.895   |
| MACF1    | 93          | 5         | 5.38%         | 177          | 5         | 2.82%         | 0.51 [0.18-1.48]     | 0.299    | 0.895   |
| PTPRD    | 93          | 5         | 5.38%         | 177          | 5         | 2.82%         | 0.51 [0.18-1.48]     | 0.299    | 0.895   |
| FRMPD4   | 93          | 4         | 4.30%         | 177          | 5         | 2.82%         | 0.65 [0.21-1.99]     | 0.524    | 0.910   |
| LRBA     | 93          | 4         | 4.30%         | 177          | 5         | 2.82%         | 0.65 [0.21-1.99]     | 0.524    | 0.910   |
| MAP2     | 93          | 4         | 4.30%         | 177          | 5         | 2.82%         | 0.65 [0.21-1.99]     | 0.524    | 0.910   |
| PCNXL2   | 93          | 4         | 4.30%         | 177          | 5         | 2.82%         | 0.65 [0.21-1.99]     | 0.524    | 0.910   |
| ANK3     | 93          | 3         | 3.23%         | 177          | 5         | 2.82%         | 0.87 [0.26-2.95]     | 0.854    | 0.961   |
| ERBB2    | 93          | 3         | 3.23%         | 177          | 5         | 2.82%         | 0.87 [0.26-2.95]     | 0.854    | 0.961   |
| FBN3     | 93          | 3         | 3.23%         | 177          | 5         | 2.82%         | 0.87 [0.26-2.95]     | 0.854    | 0.961   |
| LRP1     | 93          | 3         | 3.23%         | 177          | 5         | 2.82%         | 0.87 [0.26-2.95]     | 0.854    | 0.961   |
| RAPGEF6  | 93          | 3         | 3.23%         | 177          | 5         | 2.82%         | 0.87 [0.26-2.95]     | 0.854    | 0.961   |
| SYNE1    | 93          | 3         | 3.23%         | 177          | 5         | 2.82%         | 0.87 [0.26-2.95]     | 0.854    | 0.961   |
| ADAMTSL1 | 93          | 2         | 2.15%         | 177          | 5         | 2.82%         | 1.32 [0.33-5.32]     | 0.741    | 0.910   |
| CMYA5    | 93          | 2         | 2.15%         | 177          | 5         | 2.82%         | 1.32 [0.33-5.32]     | 0.741    | 0.910   |
| CSMD2    | 93          | 2         | 2.15%         | 177          | 5         | 2.82%         | 1.32 [0.33-5.32]     | 0.741    | 0.910   |
| CUBN     | 93          | 2         | 2.15%         | 177          | 5         | 2.82%         | 1.32 [0.33-5.32]     | 0.741    | 0.910   |
| DNAH11   | 93          | 2         | 2.15%         | 177          | 5         | 2.82%         | 1.32 [0.33-5.32]     | 0.741    | 0.910   |
| FREM3    | 93          | 2         | 2.15%         | 177          | 5         | 2.82%         | 1.32 [0.33-5.32]     | 0.741    | 0.910   |
| HECTD4   | 93          | 2         | 2.15%         | 177          | 5         | 2.82%         | 1.32 [0.33-5.32]     | 0.741    | 0.910   |

| Symbol    | CINSARC Low |           |               | CINSARC High |           |               | CINSARC High vs. Low |          |         |
|-----------|-------------|-----------|---------------|--------------|-----------|---------------|----------------------|----------|---------|
|           | N tested    | N altered | Fq alteration | N tested     | N altered | Fq alteration | OR [95%CI]           | p-value* | q-value |
| KIAA1109  | 93          | 2         | 2.15%         | 177          | 5         | 2.82%         | 1.32 [0.33-5.32]     | 0.741    | 0.910   |
| MST1P9    | 93          | 2         | 2.15%         | 177          | 5         | 2.82%         | 1.32 [0.33-5.32]     | 0.741    | 0.910   |
| MTOR      | 93          | 2         | 2.15%         | 177          | 5         | 2.82%         | 1.32 [0.33-5.32]     | 0.741    | 0.910   |
| NF1       | 93          | 2         | 2.15%         | 177          | 5         | 2.82%         | 1.32 [0.33-5.32]     | 0.741    | 0.910   |
| SDHAP1    | 93          | 2         | 2.15%         | 177          | 5         | 2.82%         | 1.32 [0.33-5.32]     | 0.741    | 0.910   |
| SEMA5A    | 93          | 2         | 2.15%         | 177          | 5         | 2.82%         | 1.32 [0.33-5.32]     | 0.741    | 0.910   |
| TPR       | 93          | 2         | 2.15%         | 177          | 5         | 2.82%         | 1.32 [0.33-5.32]     | 0.741    | 0.910   |
| ZAN       | 93          | 2         | 2.15%         | 177          | 5         | 2.82%         | 1.32 [0.33-5.32]     | 0.741    | 0.910   |
| ASH1L     | 93          | 1         | 1.08%         | 177          | 5         | 2.82%         | 2.67 [0.44-16.41]    | 0.372    | 0.895   |
| C5orf42   | 93          | 1         | 1.08%         | 177          | 5         | 2.82%         | 2.67 [0.44-16.41]    | 0.372    | 0.895   |
| COL4A4    | 93          | 1         | 1.08%         | 177          | 5         | 2.82%         | 2.67 [0.44-16.41]    | 0.372    | 0.895   |
| CRNKL1    | 93          | 1         | 1.08%         | 177          | 5         | 2.82%         | 2.67 [0.44-16.41]    | 0.372    | 0.895   |
| ERCC6     | 93          | 1         | 1.08%         | 177          | 5         | 2.82%         | 2.67 [0.44-16.41]    | 0.372    | 0.895   |
| HECW1     | 93          | 1         | 1.08%         | 177          | 5         | 2.82%         | 2.67 [0.44-16.41]    | 0.372    | 0.895   |
| KIAA2022  | 93          | 1         | 1.08%         | 177          | 5         | 2.82%         | 2.67 [0.44-16.41]    | 0.372    | 0.895   |
| LARP1     | 93          | 1         | 1.08%         | 177          | 5         | 2.82%         | 2.67 [0.44-16.41]    | 0.372    | 0.895   |
| MYH8      | 93          | 1         | 1.08%         | 177          | 5         | 2.82%         | 2.67 [0.44-16.41]    | 0.372    | 0.895   |
| MYO6      | 93          | 1         | 1.08%         | 177          | 5         | 2.82%         | 2.67 [0.44-16.41]    | 0.372    | 0.895   |
| NES       | 93          | 1         | 1.08%         | 177          | 5         | 2.82%         | 2.67 [0.44-16.41]    | 0.372    | 0.895   |
| PAPPA     | 93          | 1         | 1.08%         | 177          | 5         | 2.82%         | 2.67 [0.44-16.41]    | 0.372    | 0.895   |
| PLCE1     | 93          | 1         | 1.08%         | 177          | 5         | 2.82%         | 2.67 [0.44-16.41]    | 0.372    | 0.895   |
| SLX4      | 93          | 1         | 1.08%         | 177          | 5         | 2.82%         | 2.67 [0.44-16.41]    | 0.372    | 0.895   |
| TAF1L     | 93          | 1         | 1.08%         | 177          | 5         | 2.82%         | 2.67 [0.44-16.41]    | 0.372    | 0.895   |
| ZFP64     | 93          | 1         | 1.08%         | 177          | 5         | 2.82%         | 2.67 [0.44-16.41]    | 0.372    | 0.895   |
| ABCC8     | 93          | 0         | 0.00%         | 177          | 5         | 2.82%         | 2.5e+07 [0e+00-Inf]  | 0.993    | 0.993   |
| ACTN4     | 93          | 0         | 0.00%         | 177          | 5         | 2.82%         | 2.5e+07 [0e+00-Inf]  | 0.993    | 0.993   |
| CNOT3     | 93          | 0         | 0.00%         | 177          | 5         | 2.82%         | 2.5e+07 [0e+00-Inf]  | 0.993    | 0.993   |
| COL6A3    | 93          | 0         | 0.00%         | 177          | 5         | 2.82%         | 2.5e+07 [0e+00-Inf]  | 0.993    | 0.993   |
| HSPG2     | 93          | 0         | 0.00%         | 177          | 5         | 2.82%         | 2.5e+07 [0e+00-Inf]  | 0.993    | 0.993   |
| TBC1D8B   | 93          | 0         | 0.00%         | 177          | 5         | 2.82%         | 2.5e+07 [0e+00-Inf]  | 0.993    | 0.993   |
| ZNF804B   | 93          | 0         | 0.00%         | 177          | 5         | 2.82%         | 2.5e+07 [0e+00-Inf]  | 0.993    | 0.993   |
| CSMD1     | 93          | 5         | 5.38%         | 177          | 4         | 2.26%         | 0.41 [0.13-1.25]     | 0.188    | 0.895   |
| FCGBP     | 93          | 5         | 5.38%         | 177          | 4         | 2.26%         | 0.41 [0.13-1.25]     | 0.188    | 0.895   |
| GPR98     | 93          | 5         | 5.38%         | 177          | 4         | 2.26%         | 0.41 [0.13-1.25]     | 0.188    | 0.895   |
| C9orf174  | 93          | 4         | 4.30%         | 177          | 4         | 2.26%         | 0.51 [0.16-1.68]     | 0.355    | 0.895   |
| DYNC1H1   | 93          | 4         | 4.30%         | 177          | 4         | 2.26%         | 0.51 [0.16-1.68]     | 0.355    | 0.895   |
| GNAS      | 93          | 4         | 4.30%         | 177          | 4         | 2.26%         | 0.51 [0.16-1.68]     | 0.355    | 0.895   |
| MADD      | 93          | 4         | 4.30%         | 177          | 4         | 2.26%         | 0.51 [0.16-1.68]     | 0.355    | 0.895   |
| MYH7      | 93          | 4         | 4.30%         | 177          | 4         | 2.26%         | 0.51 [0.16-1.68]     | 0.355    | 0.895   |
| RP1       | 93          | 4         | 4.30%         | 177          | 4         | 2.26%         | 0.51 [0.16-1.68]     | 0.355    | 0.895   |
| RYR1      | 93          | 4         | 4.30%         | 177          | 4         | 2.26%         | 0.51 [0.16-1.68]     | 0.355    | 0.895   |
| VCAN      | 93          | 4         | 4.30%         | 177          | 4         | 2.26%         | 0.51 [0.16-1.68]     | 0.355    | 0.895   |
| AKAP9     | 93          | 3         | 3.23%         | 177          | 4         | 2.26%         | 0.69 [0.19-2.48]     | 0.637    | 0.910   |
| ATM       | 93          | 3         | 3.23%         | 177          | 4         | 2.26%         | 0.69 [0.19-2.48]     | 0.637    | 0.910   |
| CIT       | 93          | 3         | 3.23%         | 177          | 4         | 2.26%         | 0.69 [0.19-2.48]     | 0.637    | 0.910   |
| CTCF      | 93          | 3         | 3.23%         | 177          | 4         | 2.26%         | 0.69 [0.19-2.48]     | 0.637    | 0.910   |
| DNAH10    | 93          | 3         | 3.23%         | 177          | 4         | 2.26%         | 0.69 [0.19-2.48]     | 0.637    | 0.910   |
| DNAH9     | 93          | 3         | 3.23%         | 177          | 4         | 2.26%         | 0.69 [0.19-2.48]     | 0.637    | 0.910   |
| FAT1      | 93          | 3         | 3.23%         | 177          | 4         | 2.26%         | 0.69 [0.19-2.48]     | 0.637    | 0.910   |
| FLNB      | 93          | 3         | 3.23%         | 177          | 4         | 2.26%         | 0.69 [0.19-2.48]     | 0.637    | 0.910   |
| GOLGA6L2  | 93          | 3         | 3.23%         | 177          | 4         | 2.26%         | 0.69 [0.19-2.48]     | 0.637    | 0.910   |
| HERC2     | 93          | 3         | 3.23%         | 177          | 4         | 2.26%         | 0.69 [0.19-2.48]     | 0.637    | 0.910   |
| NRXN1     | 93          | 3         | 3.23%         | 177          | 4         | 2.26%         | 0.69 [0.19-2.48]     | 0.637    | 0.910   |
| PAPPA2    | 93          | 3         | 3.23%         | 177          | 4         | 2.26%         | 0.69 [0.19-2.48]     | 0.637    | 0.910   |
| PLXNA4    | 93          | 3         | 3.23%         | 177          | 4         | 2.26%         | 0.69 [0.19-2.48]     | 0.637    | 0.910   |
| RUNX1     | 93          | 3         | 3.23%         | 177          | 4         | 2.26%         | 0.69 [0.19-2.48]     | 0.637    | 0.910   |
| SCN10A    | 93          | 3         | 3.23%         | 177          | 4         | 2.26%         | 0.69 [0.19-2.48]     | 0.637    | 0.910   |
| TMEM132D  | 93          | 3         | 3.23%         | 177          | 4         | 2.26%         | 0.69 [0.19-2.48]     | 0.637    | 0.910   |
| ABR       | 93          | 2         | 2.15%         | 177          | 4         | 2.26%         | 1.05 [0.25-4.44]     | 0.954    | 0.974   |
| ANKRD30BL | 93          | 2         | 2.15%         | 177          | 4         | 2.26%         | 1.05 [0.25-4.44]     | 0.954    | 0.974   |
| APOBR     | 93          | 2         | 2.15%         | 177          | 4         | 2.26%         | 1.05 [0.25-4.44]     | 0.954    | 0.974   |
| ATRX      | 93          | 2         | 2.15%         | 177          | 4         | 2.26%         | 1.05 [0.25-4.44]     | 0.954    | 0.974   |
| C1orf173  | 93          | 2         | 2.15%         | 177          | 4         | 2.26%         | 1.05 [0.25-4.44]     | 0.954    | 0.974   |
| CENPE     | 93          | 2         | 2.15%         | 177          | 4         | 2.26%         | 1.05 [0.25-4.44]     | 0.954    | 0.974   |
| CHD8      | 93          | 2         | 2.15%         | 177          | 4         | 2.26%         | 1.05 [0.25-4.44]     | 0.954    | 0.974   |
| COL12A1   | 93          | 2         | 2.15%         | 177          | 4         | 2.26%         | 1.05 [0.25-4.44]     | 0.954    | 0.974   |
| CSMD3     | 93          | 2         | 2.15%         | 177          | 4         | 2.26%         | 1.05 [0.25-4.44]     | 0.954    | 0.974   |
| DNAH17    | 93          | 2         | 2.15%         | 177          | 4         | 2.26%         | 1.05 [0.25-4.44]     | 0.954    | 0.974   |
| EPG5      | 93          | 2         | 2.15%         | 177          | 4         | 2.26%         | 1.05 [0.25-4.44]     | 0.954    | 0.974   |
| HEATR7B2  | 93          | 2         | 2.15%         | 177          | 4         | 2.26%         | 1.05 [0.25-4.44]     | 0.954    | 0.974   |
| LRP4      | 93          | 2         | 2.15%         | 177          | 4         | 2.26%         | 1.05 [0.25-4.44]     | 0.954    | 0.974   |
| MALAT1    | 93          | 2         | 2.15%         | 177          | 4         | 2.26%         | 1.05 [0.25-4.44]     | 0.954    | 0.974   |
| MICAL3    | 93          | 2         | 2.15%         | 177          | 4         | 2.26%         | 1.05 [0.25-4.44]     | 0.954    | 0.974   |
| MYO5B     | 93          | 2         | 2.15%         | 177          | 4         | 2.26%         | 1.05 [0.25-4.44]     | 0.954    | 0.974   |
| NUP98     | 93          | 2         | 2.15%         | 177          | 4         | 2.26%         | 1.05 [0.25-4.44]     | 0.954    | 0.974   |
| PARP4     | 93          | 2         | 2.15%         | 177          | 4         | 2.26%         | 1.05 [0.25-4.44]     | 0.954    | 0.974   |

| Symbol   | CINSARC Low |           |               | CINSARC High |           |               | CINSARC High vs. Low |          |         |
|----------|-------------|-----------|---------------|--------------|-----------|---------------|----------------------|----------|---------|
|          | N tested    | N altered | Fq alteration | N tested     | N altered | Fq alteration | OR [95%CI]           | p-value* | q-value |
| PCDH19   | 93          | 2         | 2.15%         | 177          | 4         | 2.26%         | 1.05 [0.25-4.44]     | 0.954    | 0.974   |
| PIK3R1   | 93          | 2         | 2.15%         | 177          | 4         | 2.26%         | 1.05 [0.25-4.44]     | 0.954    | 0.974   |
| PIWIL1   | 93          | 2         | 2.15%         | 177          | 4         | 2.26%         | 1.05 [0.25-4.44]     | 0.954    | 0.974   |
| PTPRB    | 93          | 2         | 2.15%         | 177          | 4         | 2.26%         | 1.05 [0.25-4.44]     | 0.954    | 0.974   |
| SHROOM2  | 93          | 2         | 2.15%         | 177          | 4         | 2.26%         | 1.05 [0.25-4.44]     | 0.954    | 0.974   |
| SRCAP    | 93          | 2         | 2.15%         | 177          | 4         | 2.26%         | 1.05 [0.25-4.44]     | 0.954    | 0.974   |
| TG       | 93          | 2         | 2.15%         | 177          | 4         | 2.26%         | 1.05 [0.25-4.44]     | 0.954    | 0.974   |
| VPS13B   | 93          | 2         | 2.15%         | 177          | 4         | 2.26%         | 1.05 [0.25-4.44]     | 0.954    | 0.974   |
| ZNF814   | 93          | 2         | 2.15%         | 177          | 4         | 2.26%         | 1.05 [0.25-4.44]     | 0.954    | 0.974   |
| ZNF831   | 93          | 2         | 2.15%         | 177          | 4         | 2.26%         | 1.05 [0.25-4.44]     | 0.954    | 0.974   |
| ADAMTS20 | 93          | 1         | 1.08%         | 177          | 4         | 2.26%         | 2.13 [0.33-13.54]    | 0.502    | 0.895   |
| ATP2A1   | 93          | 1         | 1.08%         | 177          | 4         | 2.26%         | 2.13 [0.33-13.54]    | 0.502    | 0.895   |
| CACNA1A  | 93          | 1         | 1.08%         | 177          | 4         | 2.26%         | 2.13 [0.33-13.54]    | 0.502    | 0.895   |
| CACNA1C  | 93          | 1         | 1.08%         | 177          | 4         | 2.26%         | 2.13 [0.33-13.54]    | 0.502    | 0.895   |
| CDH12    | 93          | 1         | 1.08%         | 177          | 4         | 2.26%         | 2.13 [0.33-13.54]    | 0.502    | 0.895   |
| CEP192   | 93          | 1         | 1.08%         | 177          | 4         | 2.26%         | 2.13 [0.33-13.54]    | 0.502    | 0.895   |
| CNTN6    | 93          | 1         | 1.08%         | 177          | 4         | 2.26%         | 2.13 [0.33-13.54]    | 0.502    | 0.895   |
| COL19A1  | 93          | 1         | 1.08%         | 177          | 4         | 2.26%         | 2.13 [0.33-13.54]    | 0.502    | 0.895   |
| COL4A6   | 93          | 1         | 1.08%         | 177          | 4         | 2.26%         | 2.13 [0.33-13.54]    | 0.502    | 0.895   |
| COL5A1   | 93          | 1         | 1.08%         | 177          | 4         | 2.26%         | 2.13 [0.33-13.54]    | 0.502    | 0.895   |
| CR1      | 93          | 1         | 1.08%         | 177          | 4         | 2.26%         | 2.13 [0.33-13.54]    | 0.502    | 0.895   |
| CRIPAK   | 93          | 1         | 1.08%         | 177          | 4         | 2.26%         | 2.13 [0.33-13.54]    | 0.502    | 0.895   |
| DHX57    | 93          | 1         | 1.08%         | 177          | 4         | 2.26%         | 2.13 [0.33-13.54]    | 0.502    | 0.895   |
| DNAH2    | 93          | 1         | 1.08%         | 177          | 4         | 2.26%         | 2.13 [0.33-13.54]    | 0.502    | 0.895   |
| DNAH5    | 93          | 1         | 1.08%         | 177          | 4         | 2.26%         | 2.13 [0.33-13.54]    | 0.502    | 0.895   |
| ERBB4    | 93          | 1         | 1.08%         | 177          | 4         | 2.26%         | 2.13 [0.33-13.54]    | 0.502    | 0.895   |
| EYS      | 93          | 1         | 1.08%         | 177          | 4         | 2.26%         | 2.13 [0.33-13.54]    | 0.502    | 0.895   |
| F5       | 93          | 1         | 1.08%         | 177          | 4         | 2.26%         | 2.13 [0.33-13.54]    | 0.502    | 0.895   |
| FAM186A  | 93          | 1         | 1.08%         | 177          | 4         | 2.26%         | 2.13 [0.33-13.54]    | 0.502    | 0.895   |
| FAT4     | 93          | 1         | 1.08%         | 177          | 4         | 2.26%         | 2.13 [0.33-13.54]    | 0.502    | 0.895   |
| FGFR2    | 93          | 1         | 1.08%         | 177          | 4         | 2.26%         | 2.13 [0.33-13.54]    | 0.502    | 0.895   |
| FNDC1    | 93          | 1         | 1.08%         | 177          | 4         | 2.26%         | 2.13 [0.33-13.54]    | 0.502    | 0.895   |
| HECTD1   | 93          | 1         | 1.08%         | 177          | 4         | 2.26%         | 2.13 [0.33-13.54]    | 0.502    | 0.895   |
| HS6ST1   | 93          | 1         | 1.08%         | 177          | 4         | 2.26%         | 2.13 [0.33-13.54]    | 0.502    | 0.895   |
| KIAA0232 | 93          | 1         | 1.08%         | 177          | 4         | 2.26%         | 2.13 [0.33-13.54]    | 0.502    | 0.895   |
| KIAA1210 | 93          | 1         | 1.08%         | 177          | 4         | 2.26%         | 2.13 [0.33-13.54]    | 0.502    | 0.895   |
| KIF1B    | 93          | 1         | 1.08%         | 177          | 4         | 2.26%         | 2.13 [0.33-13.54]    | 0.502    | 0.895   |
| LETM1    | 93          | 1         | 1.08%         | 177          | 4         | 2.26%         | 2.13 [0.33-13.54]    | 0.502    | 0.895   |
| MAPRE3   | 93          | 1         | 1.08%         | 177          | 4         | 2.26%         | 2.13 [0.33-13.54]    | 0.502    | 0.895   |
| MAST4    | 93          | 1         | 1.08%         | 177          | 4         | 2.26%         | 2.13 [0.33-13.54]    | 0.502    | 0.895   |
| MED14    | 93          | 1         | 1.08%         | 177          | 4         | 2.26%         | 2.13 [0.33-13.54]    | 0.502    | 0.895   |
| MYADML   | 93          | 1         | 1.08%         | 177          | 4         | 2.26%         | 2.13 [0.33-13.54]    | 0.502    | 0.895   |
| OBSL1    | 93          | 1         | 1.08%         | 177          | 4         | 2.26%         | 2.13 [0.33-13.54]    | 0.502    | 0.895   |
| PCDHA11  | 93          | 1         | 1.08%         | 177          | 4         | 2.26%         | 2.13 [0.33-13.54]    | 0.502    | 0.895   |
| PRKCE    | 93          | 1         | 1.08%         | 177          | 4         | 2.26%         | 2.13 [0.33-13.54]    | 0.502    | 0.895   |
| REV3L    | 93          | 1         | 1.08%         | 177          | 4         | 2.26%         | 2.13 [0.33-13.54]    | 0.502    | 0.895   |
| RPS6KA1  | 93          | 1         | 1.08%         | 177          | 4         | 2.26%         | 2.13 [0.33-13.54]    | 0.502    | 0.895   |
| SCN1A    | 93          | 1         | 1.08%         | 177          | 4         | 2.26%         | 2.13 [0.33-13.54]    | 0.502    | 0.895   |
| SELP     | 93          | 1         | 1.08%         | 177          | 4         | 2.26%         | 2.13 [0.33-13.54]    | 0.502    | 0.895   |
| SMARCC2  | 93          | 1         | 1.08%         | 177          | 4         | 2.26%         | 2.13 [0.33-13.54]    | 0.502    | 0.895   |
| SOGA1    | 93          | 1         | 1.08%         | 177          | 4         | 2.26%         | 2.13 [0.33-13.54]    | 0.502    | 0.895   |
| UBE4A    | 93          | 1         | 1.08%         | 177          | 4         | 2.26%         | 2.13 [0.33-13.54]    | 0.502    | 0.895   |
| VCPPI1   | 93          | 1         | 1.08%         | 177          | 4         | 2.26%         | 2.13 [0.33-13.54]    | 0.502    | 0.895   |
| VWDE     | 93          | 1         | 1.08%         | 177          | 4         | 2.26%         | 2.13 [0.33-13.54]    | 0.502    | 0.895   |
| ZFYVE19  | 93          | 1         | 1.08%         | 177          | 4         | 2.26%         | 2.13 [0.33-13.54]    | 0.502    | 0.895   |
| ZNF292   | 93          | 1         | 1.08%         | 177          | 4         | 2.26%         | 2.13 [0.33-13.54]    | 0.502    | 0.895   |
| ATP10B   | 93          | 5         | 5.38%         | 177          | 3         | 1.69%         | 0.30 [0.09-1.03]     | 0.108    | 0.895   |
| PKHD1L1  | 93          | 5         | 5.38%         | 177          | 3         | 1.69%         | 0.30 [0.09-1.03]     | 0.108    | 0.895   |
| SACS     | 93          | 5         | 5.38%         | 177          | 3         | 1.69%         | 0.30 [0.09-1.03]     | 0.108    | 0.895   |
| ANK2     | 93          | 4         | 4.30%         | 177          | 3         | 1.69%         | 0.38 [0.11-1.37]     | 0.216    | 0.895   |
| ANKRD12  | 93          | 4         | 4.30%         | 177          | 3         | 1.69%         | 0.38 [0.11-1.37]     | 0.216    | 0.895   |
| CCDC144A | 93          | 4         | 4.30%         | 177          | 3         | 1.69%         | 0.38 [0.11-1.37]     | 0.216    | 0.895   |
| ODZ2     | 93          | 4         | 4.30%         | 177          | 3         | 1.69%         | 0.38 [0.11-1.37]     | 0.216    | 0.895   |
| RB1      | 93          | 4         | 4.30%         | 177          | 3         | 1.69%         | 0.38 [0.11-1.37]     | 0.216    | 0.895   |
| TANC2    | 93          | 4         | 4.30%         | 177          | 3         | 1.69%         | 0.38 [0.11-1.37]     | 0.216    | 0.895   |
| TNRC18   | 93          | 4         | 4.30%         | 177          | 3         | 1.69%         | 0.38 [0.11-1.37]     | 0.216    | 0.895   |
| UBR4     | 93          | 4         | 4.30%         | 177          | 3         | 1.69%         | 0.38 [0.11-1.37]     | 0.216    | 0.895   |
| AKD1     | 93          | 3         | 3.23%         | 177          | 3         | 1.69%         | 0.52 [0.13-2.01]     | 0.425    | 0.895   |
| ARID1A   | 93          | 3         | 3.23%         | 177          | 3         | 1.69%         | 0.52 [0.13-2.01]     | 0.425    | 0.895   |
| CDC42BPA | 93          | 3         | 3.23%         | 177          | 3         | 1.69%         | 0.52 [0.13-2.01]     | 0.425    | 0.895   |
| CELSR3   | 93          | 3         | 3.23%         | 177          | 3         | 1.69%         | 0.52 [0.13-2.01]     | 0.425    | 0.895   |
| DNAH12   | 93          | 3         | 3.23%         | 177          | 3         | 1.69%         | 0.52 [0.13-2.01]     | 0.425    | 0.895   |
| DOCK11   | 93          | 3         | 3.23%         | 177          | 3         | 1.69%         | 0.52 [0.13-2.01]     | 0.425    | 0.895   |
| F8       | 93          | 3         | 3.23%         | 177          | 3         | 1.69%         | 0.52 [0.13-2.01]     | 0.425    | 0.895   |
| FAM47B   | 93          | 3         | 3.23%         | 177          | 3         | 1.69%         | 0.52 [0.13-2.01]     | 0.425    | 0.895   |
| FMN2     | 93          | 3         | 3.23%         | 177          | 3         | 1.69%         | 0.52 [0.13-2.01]     | 0.425    | 0.895   |

| Symbol   | CINSARC Low |           |               | CINSARC High |           |               | CINSARC High vs. Low |          |         |
|----------|-------------|-----------|---------------|--------------|-----------|---------------|----------------------|----------|---------|
|          | N tested    | N altered | Fq alteration | N tested     | N altered | Fq alteration | OR [95%CI]           | p-value* | q-value |
| GON4L    | 93          | 3         | 3.23%         | 177          | 3         | 1.69%         | 0.52 [0.13-2.01]     | 0.425    | 0.895   |
| HEPH     | 93          | 3         | 3.23%         | 177          | 3         | 1.69%         | 0.52 [0.13-2.01]     | 0.425    | 0.895   |
| HERC1    | 93          | 3         | 3.23%         | 177          | 3         | 1.69%         | 0.52 [0.13-2.01]     | 0.425    | 0.895   |
| ITPR1    | 93          | 3         | 3.23%         | 177          | 3         | 1.69%         | 0.52 [0.13-2.01]     | 0.425    | 0.895   |
| MDN1     | 93          | 3         | 3.23%         | 177          | 3         | 1.69%         | 0.52 [0.13-2.01]     | 0.425    | 0.895   |
| MED12    | 93          | 3         | 3.23%         | 177          | 3         | 1.69%         | 0.52 [0.13-2.01]     | 0.425    | 0.895   |
| MLL      | 93          | 3         | 3.23%         | 177          | 3         | 1.69%         | 0.52 [0.13-2.01]     | 0.425    | 0.895   |
| MYOF     | 93          | 3         | 3.23%         | 177          | 3         | 1.69%         | 0.52 [0.13-2.01]     | 0.425    | 0.895   |
| ODZ4     | 93          | 3         | 3.23%         | 177          | 3         | 1.69%         | 0.52 [0.13-2.01]     | 0.425    | 0.895   |
| PDZD2    | 93          | 3         | 3.23%         | 177          | 3         | 1.69%         | 0.52 [0.13-2.01]     | 0.425    | 0.895   |
| PHF3     | 93          | 3         | 3.23%         | 177          | 3         | 1.69%         | 0.52 [0.13-2.01]     | 0.425    | 0.895   |
| PKHD1    | 93          | 3         | 3.23%         | 177          | 3         | 1.69%         | 0.52 [0.13-2.01]     | 0.425    | 0.895   |
| PLCH1    | 93          | 3         | 3.23%         | 177          | 3         | 1.69%         | 0.52 [0.13-2.01]     | 0.425    | 0.895   |
| POM121   | 93          | 3         | 3.23%         | 177          | 3         | 1.69%         | 0.52 [0.13-2.01]     | 0.425    | 0.895   |
| RPGR     | 93          | 3         | 3.23%         | 177          | 3         | 1.69%         | 0.52 [0.13-2.01]     | 0.425    | 0.895   |
| SCN8A    | 93          | 3         | 3.23%         | 177          | 3         | 1.69%         | 0.52 [0.13-2.01]     | 0.425    | 0.895   |
| SH3PXD2A | 93          | 3         | 3.23%         | 177          | 3         | 1.69%         | 0.52 [0.13-2.01]     | 0.425    | 0.895   |
| SPHKAP   | 93          | 3         | 3.23%         | 177          | 3         | 1.69%         | 0.52 [0.13-2.01]     | 0.425    | 0.895   |
| TBC1D3P5 | 93          | 3         | 3.23%         | 177          | 3         | 1.69%         | 0.52 [0.13-2.01]     | 0.425    | 0.895   |
| TLR7     | 93          | 3         | 3.23%         | 177          | 3         | 1.69%         | 0.52 [0.13-2.01]     | 0.425    | 0.895   |
| TNS1     | 93          | 3         | 3.23%         | 177          | 3         | 1.69%         | 0.52 [0.13-2.01]     | 0.425    | 0.895   |
| ZCCHC6   | 93          | 3         | 3.23%         | 177          | 3         | 1.69%         | 0.52 [0.13-2.01]     | 0.425    | 0.895   |
| ABCA9    | 93          | 2         | 2.15%         | 177          | 3         | 1.69%         | 0.78 [0.17-3.57]     | 0.792    | 0.910   |
| ABCB11   | 93          | 2         | 2.15%         | 177          | 3         | 1.69%         | 0.78 [0.17-3.57]     | 0.792    | 0.910   |
| ADCY7    | 93          | 2         | 2.15%         | 177          | 3         | 1.69%         | 0.78 [0.17-3.57]     | 0.792    | 0.910   |
| AHNAK2   | 93          | 2         | 2.15%         | 177          | 3         | 1.69%         | 0.78 [0.17-3.57]     | 0.792    | 0.910   |
| BRWD3    | 93          | 2         | 2.15%         | 177          | 3         | 1.69%         | 0.78 [0.17-3.57]     | 0.792    | 0.910   |
| CACNA1D  | 93          | 2         | 2.15%         | 177          | 3         | 1.69%         | 0.78 [0.17-3.57]     | 0.792    | 0.910   |
| CCAR1    | 93          | 2         | 2.15%         | 177          | 3         | 1.69%         | 0.78 [0.17-3.57]     | 0.792    | 0.910   |
| CDH23    | 93          | 2         | 2.15%         | 177          | 3         | 1.69%         | 0.78 [0.17-3.57]     | 0.792    | 0.910   |
| CFH      | 93          | 2         | 2.15%         | 177          | 3         | 1.69%         | 0.78 [0.17-3.57]     | 0.792    | 0.910   |
| CLEC16A  | 93          | 2         | 2.15%         | 177          | 3         | 1.69%         | 0.78 [0.17-3.57]     | 0.792    | 0.910   |
| CNTLN    | 93          | 2         | 2.15%         | 177          | 3         | 1.69%         | 0.78 [0.17-3.57]     | 0.792    | 0.910   |
| COL6A5   | 93          | 2         | 2.15%         | 177          | 3         | 1.69%         | 0.78 [0.17-3.57]     | 0.792    | 0.910   |
| DCHS1    | 93          | 2         | 2.15%         | 177          | 3         | 1.69%         | 0.78 [0.17-3.57]     | 0.792    | 0.910   |
| DENND1B  | 93          | 2         | 2.15%         | 177          | 3         | 1.69%         | 0.78 [0.17-3.57]     | 0.792    | 0.910   |
| EFCAB5   | 93          | 2         | 2.15%         | 177          | 3         | 1.69%         | 0.78 [0.17-3.57]     | 0.792    | 0.910   |
| FANCD2   | 93          | 2         | 2.15%         | 177          | 3         | 1.69%         | 0.78 [0.17-3.57]     | 0.792    | 0.910   |
| FBXW7    | 93          | 2         | 2.15%         | 177          | 3         | 1.69%         | 0.78 [0.17-3.57]     | 0.792    | 0.910   |
| FREM2    | 93          | 2         | 2.15%         | 177          | 3         | 1.69%         | 0.78 [0.17-3.57]     | 0.792    | 0.910   |
| FRMD4A   | 93          | 2         | 2.15%         | 177          | 3         | 1.69%         | 0.78 [0.17-3.57]     | 0.792    | 0.910   |
| FRMPD2   | 93          | 2         | 2.15%         | 177          | 3         | 1.69%         | 0.78 [0.17-3.57]     | 0.792    | 0.910   |
| GLYR1    | 93          | 2         | 2.15%         | 177          | 3         | 1.69%         | 0.78 [0.17-3.57]     | 0.792    | 0.910   |
| GRHL2    | 93          | 2         | 2.15%         | 177          | 3         | 1.69%         | 0.78 [0.17-3.57]     | 0.792    | 0.910   |
| GUCY2F   | 93          | 2         | 2.15%         | 177          | 3         | 1.69%         | 0.78 [0.17-3.57]     | 0.792    | 0.910   |
| INADL    | 93          | 2         | 2.15%         | 177          | 3         | 1.69%         | 0.78 [0.17-3.57]     | 0.792    | 0.910   |
| INPPL1   | 93          | 2         | 2.15%         | 177          | 3         | 1.69%         | 0.78 [0.17-3.57]     | 0.792    | 0.910   |
| KCNA1    | 93          | 2         | 2.15%         | 177          | 3         | 1.69%         | 0.78 [0.17-3.57]     | 0.792    | 0.910   |
| KCNT2    | 93          | 2         | 2.15%         | 177          | 3         | 1.69%         | 0.78 [0.17-3.57]     | 0.792    | 0.910   |
| KDM2A    | 93          | 2         | 2.15%         | 177          | 3         | 1.69%         | 0.78 [0.17-3.57]     | 0.792    | 0.910   |
| KIF1A    | 93          | 2         | 2.15%         | 177          | 3         | 1.69%         | 0.78 [0.17-3.57]     | 0.792    | 0.910   |
| KSR1     | 93          | 2         | 2.15%         | 177          | 3         | 1.69%         | 0.78 [0.17-3.57]     | 0.792    | 0.910   |
| LAMB1    | 93          | 2         | 2.15%         | 177          | 3         | 1.69%         | 0.78 [0.17-3.57]     | 0.792    | 0.910   |
| LRIG2    | 93          | 2         | 2.15%         | 177          | 3         | 1.69%         | 0.78 [0.17-3.57]     | 0.792    | 0.910   |
| LRPPRC   | 93          | 2         | 2.15%         | 177          | 3         | 1.69%         | 0.78 [0.17-3.57]     | 0.792    | 0.910   |
| MCM3AP   | 93          | 2         | 2.15%         | 177          | 3         | 1.69%         | 0.78 [0.17-3.57]     | 0.792    | 0.910   |
| MLL2     | 93          | 2         | 2.15%         | 177          | 3         | 1.69%         | 0.78 [0.17-3.57]     | 0.792    | 0.910   |
| MLLT10   | 93          | 2         | 2.15%         | 177          | 3         | 1.69%         | 0.78 [0.17-3.57]     | 0.792    | 0.910   |
| MUC17    | 93          | 2         | 2.15%         | 177          | 3         | 1.69%         | 0.78 [0.17-3.57]     | 0.792    | 0.910   |
| MYO3A    | 93          | 2         | 2.15%         | 177          | 3         | 1.69%         | 0.78 [0.17-3.57]     | 0.792    | 0.910   |
| NAALADL2 | 93          | 2         | 2.15%         | 177          | 3         | 1.69%         | 0.78 [0.17-3.57]     | 0.792    | 0.910   |
| NBEAL1   | 93          | 2         | 2.15%         | 177          | 3         | 1.69%         | 0.78 [0.17-3.57]     | 0.792    | 0.910   |
| NIN      | 93          | 2         | 2.15%         | 177          | 3         | 1.69%         | 0.78 [0.17-3.57]     | 0.792    | 0.910   |
| NLRP9    | 93          | 2         | 2.15%         | 177          | 3         | 1.69%         | 0.78 [0.17-3.57]     | 0.792    | 0.910   |
| NPAS4    | 93          | 2         | 2.15%         | 177          | 3         | 1.69%         | 0.78 [0.17-3.57]     | 0.792    | 0.910   |
| NYNRIN   | 93          | 2         | 2.15%         | 177          | 3         | 1.69%         | 0.78 [0.17-3.57]     | 0.792    | 0.910   |
| OCRL     | 93          | 2         | 2.15%         | 177          | 3         | 1.69%         | 0.78 [0.17-3.57]     | 0.792    | 0.910   |
| OTOF     | 93          | 2         | 2.15%         | 177          | 3         | 1.69%         | 0.78 [0.17-3.57]     | 0.792    | 0.910   |
| PCDHA8   | 93          | 2         | 2.15%         | 177          | 3         | 1.69%         | 0.78 [0.17-3.57]     | 0.792    | 0.910   |
| PLCL2    | 93          | 2         | 2.15%         | 177          | 3         | 1.69%         | 0.78 [0.17-3.57]     | 0.792    | 0.910   |
| PLCZ1    | 93          | 2         | 2.15%         | 177          | 3         | 1.69%         | 0.78 [0.17-3.57]     | 0.792    | 0.910   |
| PREX2    | 93          | 2         | 2.15%         | 177          | 3         | 1.69%         | 0.78 [0.17-3.57]     | 0.792    | 0.910   |
| PRKCQ    | 93          | 2         | 2.15%         | 177          | 3         | 1.69%         | 0.78 [0.17-3.57]     | 0.792    | 0.910   |
| PRPF8    | 93          | 2         | 2.15%         | 177          | 3         | 1.69%         | 0.78 [0.17-3.57]     | 0.792    | 0.910   |
| PTPN22   | 93          | 2         | 2.15%         | 177          | 3         | 1.69%         | 0.78 [0.17-3.57]     | 0.792    | 0.910   |
| SCN11A   | 93          | 2         | 2.15%         | 177          | 3         | 1.69%         | 0.78 [0.17-3.57]     | 0.792    | 0.910   |



| Symbol   | CINSARC Low |           |               | CINSARC High |           |               | CINSARC High vs. Low |          |         |
|----------|-------------|-----------|---------------|--------------|-----------|---------------|----------------------|----------|---------|
|          | N tested    | N altered | Fq alteration | N tested     | N altered | Fq alteration | OR [95%CI]           | p-value* | q-value |
| SCN3A    | 93          | 2         | 2.15%         | 177          | 3         | 1.69%         | 0.78 [0.17-3.57]     | 0.792    | 0.910   |
| SDK1     | 93          | 2         | 2.15%         | 177          | 3         | 1.69%         | 0.78 [0.17-3.57]     | 0.792    | 0.910   |
| SHANK2   | 93          | 2         | 2.15%         | 177          | 3         | 1.69%         | 0.78 [0.17-3.57]     | 0.792    | 0.910   |
| SIPA1L3  | 93          | 2         | 2.15%         | 177          | 3         | 1.69%         | 0.78 [0.17-3.57]     | 0.792    | 0.910   |
| SLCO1B3  | 93          | 2         | 2.15%         | 177          | 3         | 1.69%         | 0.78 [0.17-3.57]     | 0.792    | 0.910   |
| STARD8   | 93          | 2         | 2.15%         | 177          | 3         | 1.69%         | 0.78 [0.17-3.57]     | 0.792    | 0.910   |
| SVEP1    | 93          | 2         | 2.15%         | 177          | 3         | 1.69%         | 0.78 [0.17-3.57]     | 0.792    | 0.910   |
| TBC1D4   | 93          | 2         | 2.15%         | 177          | 3         | 1.69%         | 0.78 [0.17-3.57]     | 0.792    | 0.910   |
| TNKS1BP1 | 93          | 2         | 2.15%         | 177          | 3         | 1.69%         | 0.78 [0.17-3.57]     | 0.792    | 0.910   |
| TRPM3    | 93          | 2         | 2.15%         | 177          | 3         | 1.69%         | 0.78 [0.17-3.57]     | 0.792    | 0.910   |
| UACA     | 93          | 2         | 2.15%         | 177          | 3         | 1.69%         | 0.78 [0.17-3.57]     | 0.792    | 0.910   |
| UNC5D    | 93          | 2         | 2.15%         | 177          | 3         | 1.69%         | 0.78 [0.17-3.57]     | 0.792    | 0.910   |
| ABCA13   | 93          | 5         | 5.38%         | 177          | 2         | 1.13%         | 0.20 [0.05-0.81]     | 0.0582   | 0.895   |
| VPS13C   | 93          | 5         | 5.38%         | 177          | 2         | 1.13%         | 0.20 [0.05-0.81]     | 0.0582   | 0.895   |
| AFF2     | 93          | 4         | 4.30%         | 177          | 2         | 1.13%         | 0.25 [0.06-1.07]     | 0.118    | 0.895   |
| ALMS1    | 93          | 4         | 4.30%         | 177          | 2         | 1.13%         | 0.25 [0.06-1.07]     | 0.118    | 0.895   |
| COL27A1  | 93          | 4         | 4.30%         | 177          | 2         | 1.13%         | 0.25 [0.06-1.07]     | 0.118    | 0.895   |
| CPAMD8   | 93          | 4         | 4.30%         | 177          | 2         | 1.13%         | 0.25 [0.06-1.07]     | 0.118    | 0.895   |
| DCHS2    | 93          | 4         | 4.30%         | 177          | 2         | 1.13%         | 0.25 [0.06-1.07]     | 0.118    | 0.895   |
| DNAH1    | 93          | 4         | 4.30%         | 177          | 2         | 1.13%         | 0.25 [0.06-1.07]     | 0.118    | 0.895   |
| KIAA0430 | 93          | 4         | 4.30%         | 177          | 2         | 1.13%         | 0.25 [0.06-1.07]     | 0.118    | 0.895   |
| MYCBP2   | 93          | 4         | 4.30%         | 177          | 2         | 1.13%         | 0.25 [0.06-1.07]     | 0.118    | 0.895   |
| PRRX1    | 93          | 4         | 4.30%         | 177          | 2         | 1.13%         | 0.25 [0.06-1.07]     | 0.118    | 0.895   |
| PTPRT    | 93          | 4         | 4.30%         | 177          | 2         | 1.13%         | 0.25 [0.06-1.07]     | 0.118    | 0.895   |
| TCHH     | 93          | 4         | 4.30%         | 177          | 2         | 1.13%         | 0.25 [0.06-1.07]     | 0.118    | 0.895   |
| TP53BP1  | 93          | 4         | 4.30%         | 177          | 2         | 1.13%         | 0.25 [0.06-1.07]     | 0.118    | 0.895   |
| VWA3B    | 93          | 4         | 4.30%         | 177          | 2         | 1.13%         | 0.25 [0.06-1.07]     | 0.118    | 0.895   |
| WNK3     | 93          | 4         | 4.30%         | 177          | 2         | 1.13%         | 0.25 [0.06-1.07]     | 0.118    | 0.895   |
| ADGB     | 93          | 3         | 3.23%         | 177          | 2         | 1.13%         | 0.34 [0.075-1.56]    | 0.246    | 0.895   |
| AFF3     | 93          | 3         | 3.23%         | 177          | 2         | 1.13%         | 0.34 [0.075-1.56]    | 0.246    | 0.895   |
| ARHGAP12 | 93          | 3         | 3.23%         | 177          | 2         | 1.13%         | 0.34 [0.075-1.56]    | 0.246    | 0.895   |
| ATG9B    | 93          | 3         | 3.23%         | 177          | 2         | 1.13%         | 0.34 [0.075-1.56]    | 0.246    | 0.895   |
| CBFB     | 93          | 3         | 3.23%         | 177          | 2         | 1.13%         | 0.34 [0.075-1.56]    | 0.246    | 0.895   |
| CDH20    | 93          | 3         | 3.23%         | 177          | 2         | 1.13%         | 0.34 [0.075-1.56]    | 0.246    | 0.895   |
| CDH9     | 93          | 3         | 3.23%         | 177          | 2         | 1.13%         | 0.34 [0.075-1.56]    | 0.246    | 0.895   |
| CEP350   | 93          | 3         | 3.23%         | 177          | 2         | 1.13%         | 0.34 [0.075-1.56]    | 0.246    | 0.895   |
| CHD1     | 93          | 3         | 3.23%         | 177          | 2         | 1.13%         | 0.34 [0.075-1.56]    | 0.246    | 0.895   |
| DPP10    | 93          | 3         | 3.23%         | 177          | 2         | 1.13%         | 0.34 [0.075-1.56]    | 0.246    | 0.895   |
| ELTD1    | 93          | 3         | 3.23%         | 177          | 2         | 1.13%         | 0.34 [0.075-1.56]    | 0.246    | 0.895   |
| FREM1    | 93          | 3         | 3.23%         | 177          | 2         | 1.13%         | 0.34 [0.075-1.56]    | 0.246    | 0.895   |
| FRYL     | 93          | 3         | 3.23%         | 177          | 2         | 1.13%         | 0.34 [0.075-1.56]    | 0.246    | 0.895   |
| GRIK1    | 93          | 3         | 3.23%         | 177          | 2         | 1.13%         | 0.34 [0.075-1.56]    | 0.246    | 0.895   |
| GTF3C1   | 93          | 3         | 3.23%         | 177          | 2         | 1.13%         | 0.34 [0.075-1.56]    | 0.246    | 0.895   |
| IQSEC2   | 93          | 3         | 3.23%         | 177          | 2         | 1.13%         | 0.34 [0.075-1.56]    | 0.246    | 0.895   |
| ITPR3    | 93          | 3         | 3.23%         | 177          | 2         | 1.13%         | 0.34 [0.075-1.56]    | 0.246    | 0.895   |
| JAK1     | 93          | 3         | 3.23%         | 177          | 2         | 1.13%         | 0.34 [0.075-1.56]    | 0.246    | 0.895   |
| KCNK18   | 93          | 3         | 3.23%         | 177          | 2         | 1.13%         | 0.34 [0.075-1.56]    | 0.246    | 0.895   |
| KIAA1211 | 93          | 3         | 3.23%         | 177          | 2         | 1.13%         | 0.34 [0.075-1.56]    | 0.246    | 0.895   |
| MYH10    | 93          | 3         | 3.23%         | 177          | 2         | 1.13%         | 0.34 [0.075-1.56]    | 0.246    | 0.895   |
| MYO18B   | 93          | 3         | 3.23%         | 177          | 2         | 1.13%         | 0.34 [0.075-1.56]    | 0.246    | 0.895   |
| NLRP2    | 93          | 3         | 3.23%         | 177          | 2         | 1.13%         | 0.34 [0.075-1.56]    | 0.246    | 0.895   |
| ODZ1     | 93          | 3         | 3.23%         | 177          | 2         | 1.13%         | 0.34 [0.075-1.56]    | 0.246    | 0.895   |
| PKD1     | 93          | 3         | 3.23%         | 177          | 2         | 1.13%         | 0.34 [0.075-1.56]    | 0.246    | 0.895   |
| PLA2G4D  | 93          | 3         | 3.23%         | 177          | 2         | 1.13%         | 0.34 [0.075-1.56]    | 0.246    | 0.895   |
| PLEKHG2  | 93          | 3         | 3.23%         | 177          | 2         | 1.13%         | 0.34 [0.075-1.56]    | 0.246    | 0.895   |
| RBM12    | 93          | 3         | 3.23%         | 177          | 2         | 1.13%         | 0.34 [0.075-1.56]    | 0.246    | 0.895   |
| RNF111   | 93          | 3         | 3.23%         | 177          | 2         | 1.13%         | 0.34 [0.075-1.56]    | 0.246    | 0.895   |
| SPTBN2   | 93          | 3         | 3.23%         | 177          | 2         | 1.13%         | 0.34 [0.075-1.56]    | 0.246    | 0.895   |
| SSH1     | 93          | 3         | 3.23%         | 177          | 2         | 1.13%         | 0.34 [0.075-1.56]    | 0.246    | 0.895   |
| TEP1     | 93          | 3         | 3.23%         | 177          | 2         | 1.13%         | 0.34 [0.075-1.56]    | 0.246    | 0.895   |
| TRAPP8   | 93          | 3         | 3.23%         | 177          | 2         | 1.13%         | 0.34 [0.075-1.56]    | 0.246    | 0.895   |
| USP25    | 93          | 3         | 3.23%         | 177          | 2         | 1.13%         | 0.34 [0.075-1.56]    | 0.246    | 0.895   |
| WDR66    | 93          | 3         | 3.23%         | 177          | 2         | 1.13%         | 0.34 [0.075-1.56]    | 0.246    | 0.895   |
| XDH      | 93          | 3         | 3.23%         | 177          | 2         | 1.13%         | 0.34 [0.075-1.56]    | 0.246    | 0.895   |
| XIRP2    | 93          | 3         | 3.23%         | 177          | 2         | 1.13%         | 0.34 [0.075-1.56]    | 0.246    | 0.895   |
| ZCCHC11  | 93          | 3         | 3.23%         | 177          | 2         | 1.13%         | 0.34 [0.075-1.56]    | 0.246    | 0.895   |
| ZP4      | 93          | 3         | 3.23%         | 177          | 2         | 1.13%         | 0.34 [0.075-1.56]    | 0.246    | 0.895   |
| MXRA5    | 93          | 6         | 6.45%         | 177          | 1         | 0.56%         | 0.082 [0.014-0.49]   | 2.18E-02 | 0.895   |
| SCN2A    | 93          | 6         | 6.45%         | 177          | 1         | 0.56%         | 0.082 [0.014-0.49]   | 2.18E-02 | 0.895   |
| SETX     | 93          | 6         | 6.45%         | 177          | 1         | 0.56%         | 0.082 [0.014-0.49]   | 2.18E-02 | 0.895   |
| LRP1B    | 93          | 5         | 5.38%         | 177          | 1         | 0.56%         | 0.10 [0.016-0.61]    | 3.69E-02 | 0.895   |
| PRKDC    | 93          | 5         | 5.38%         | 177          | 1         | 0.56%         | 0.10 [0.016-0.61]    | 3.69E-02 | 0.895   |
| ASTN1    | 93          | 4         | 4.30%         | 177          | 1         | 0.56%         | 0.13 [0.02-0.81]     | 0.0661   | 0.895   |
| DNAJC13  | 93          | 4         | 4.30%         | 177          | 1         | 0.56%         | 0.13 [0.02-0.81]     | 0.0661   | 0.895   |
| DOCK8    | 93          | 4         | 4.30%         | 177          | 1         | 0.56%         | 0.13 [0.02-0.81]     | 0.0661   | 0.895   |
| FN1      | 93          | 4         | 4.30%         | 177          | 1         | 0.56%         | 0.13 [0.02-0.81]     | 0.0661   | 0.895   |

| Symbol          | CINSARC Low |           |               | CINSARC High |           |               | CINSARC High vs. Low |          |         |
|-----------------|-------------|-----------|---------------|--------------|-----------|---------------|----------------------|----------|---------|
|                 | N tested    | N altered | Fq alteration | N tested     | N altered | Fq alteration | OR [95%CI]           | p-value* | q-value |
| <i>GGT3P</i>    | 93          | 4         | 4.30%         | 177          | 1         | 0.56%         | 0.13 [0.02-0.81]     | 0.0661   | 0.895   |
| <i>KIAA1731</i> | 93          | 4         | 4.30%         | 177          | 1         | 0.56%         | 0.13 [0.02-0.81]     | 0.0661   | 0.895   |
| <i>PCDH9</i>    | 93          | 4         | 4.30%         | 177          | 1         | 0.56%         | 0.13 [0.02-0.81]     | 0.0661   | 0.895   |
| <i>PCNT</i>     | 93          | 4         | 4.30%         | 177          | 1         | 0.56%         | 0.13 [0.02-0.81]     | 0.0661   | 0.895   |
| <i>SDK2</i>     | 93          | 4         | 4.30%         | 177          | 1         | 0.56%         | 0.13 [0.02-0.81]     | 0.0661   | 0.895   |
| <i>SPATA13</i>  | 93          | 4         | 4.30%         | 177          | 1         | 0.56%         | 0.13 [0.02-0.81]     | 0.0661   | 0.895   |
| <i>SSPO</i>     | 93          | 4         | 4.30%         | 177          | 1         | 0.56%         | 0.13 [0.02-0.81]     | 0.0661   | 0.895   |
| <i>TEX15</i>    | 93          | 4         | 4.30%         | 177          | 1         | 0.56%         | 0.13 [0.02-0.81]     | 0.0661   | 0.895   |
| <i>UBC</i>      | 93          | 4         | 4.30%         | 177          | 1         | 0.56%         | 0.13 [0.02-0.81]     | 0.0661   | 0.895   |
| <i>UBE4B</i>    | 93          | 4         | 4.30%         | 177          | 1         | 0.56%         | 0.13 [0.02-0.81]     | 0.0661   | 0.895   |

\*, logistic regression

**Supplementary Table 5: Comparison of frequency of amplifications among the 3,842 genes altered in at least 5/297 tested samples (TCGA) between the two CINSARC classes in Luminal B breast cancers.**

| Symbol   | CINSARC Low |           |               | CINSARC High |           |               | CINSARC High vs. Low |          |         |
|----------|-------------|-----------|---------------|--------------|-----------|---------------|----------------------|----------|---------|
|          | N tested    | N altered | Fq alteration | N tested     | N altered | Fq alteration | OR [95%CI]           | p-value* | q-value |
| RBFOX1   | 101         | 5         | 4.95%         | 196          | 5         | 2.55%         | 0.50 [0.17-1.45]     | 0.286    | 0.650   |
| AANAT    | 101         | 3         | 2.97%         | 196          | 16        | 8.16%         | 2.90 [1.01-8.34]     | 0.097    | 0.507   |
| AATF     | 101         | 2         | 1.98%         | 196          | 5         | 2.55%         | 1.30 [0.32-5.21]     | 0.759    | 0.996   |
| AATK     | 101         | 2         | 1.98%         | 196          | 12        | 6.12%         | 3.23 [0.90-11.53]    | 0.130    | 0.535   |
| ABAT     | 101         | 5         | 4.95%         | 196          | 5         | 2.55%         | 0.50 [0.17-1.45]     | 0.286    | 0.650   |
| ABCA10   | 101         | 6         | 5.94%         | 196          | 20        | 10.20%        | 1.80 [0.81-3.98]     | 0.224    | 0.596   |
| ABCA17P  | 101         | 6         | 5.94%         | 196          | 5         | 2.55%         | 0.41 [0.15-1.15]     | 0.154    | 0.535   |
| ABCA3    | 101         | 6         | 5.94%         | 196          | 5         | 2.55%         | 0.41 [0.15-1.15]     | 0.154    | 0.535   |
| ABCA5    | 101         | 5         | 4.95%         | 196          | 21        | 10.71%        | 2.30 [0.99-5.36]     | 0.104    | 0.507   |
| ABCA6    | 101         | 6         | 5.94%         | 196          | 19        | 9.69%         | 1.70 [0.77-3.78]     | 0.274    | 0.643   |
| ABCA8    | 101         | 7         | 6.93%         | 196          | 19        | 9.69%         | 1.44 [0.68-3.07]     | 0.427    | 0.791   |
| ABCA9    | 101         | 6         | 5.94%         | 196          | 19        | 9.69%         | 1.70 [0.77-3.78]     | 0.274    | 0.643   |
| ABCB10   | 101         | 6         | 5.94%         | 196          | 19        | 9.69%         | 1.70 [0.77-3.78]     | 0.274    | 0.643   |
| ABCB5    | 101         | 0         | 0.00%         | 196          | 6         | 3.06%         | 2.7e+07 [0e+00-Inf]  | 0.992    | 1.000   |
| ABCC12   | 101         | 1         | 0.99%         | 196          | 4         | 2.04%         | 2.08 [0.33-13.25]    | 0.514    | 0.805   |
| ABCC1    | 101         | 7         | 6.93%         | 196          | 3         | 1.53%         | 0.21 [0.066-0.66]    | 2.55E-02 | 0.507   |
| ABCC3    | 101         | 4         | 3.96%         | 196          | 19        | 9.69%         | 2.60 [1.03-6.59]     | 0.090    | 0.507   |
| ABCC5    | 101         | 3         | 2.97%         | 196          | 2         | 1.02%         | 0.34 [0.074-1.53]    | 0.237    | 0.599   |
| ABCC6P1  | 101         | 8         | 7.92%         | 196          | 5         | 2.55%         | 0.30 [0.12-0.80]     | 4.16E-02 | 0.507   |
| ABCC6P2  | 101         | 11        | 10.89%        | 196          | 3         | 1.53%         | 0.13 [0.043-0.38]    | 1.89E-03 | 0.507   |
| ABCC6    | 101         | 7         | 6.93%         | 196          | 3         | 1.53%         | 0.21 [0.066-0.66]    | 2.55E-02 | 0.507   |
| ABCC8    | 101         | 1         | 0.99%         | 196          | 4         | 2.04%         | 2.08 [0.33-13.25]    | 0.514    | 0.805   |
| ABCF3    | 101         | 3         | 2.97%         | 196          | 2         | 1.02%         | 0.34 [0.074-1.53]    | 0.237    | 0.599   |
| ABHD15   | 101         | 3         | 2.97%         | 196          | 5         | 2.55%         | 0.86 [0.25-2.89]     | 0.833    | 1.000   |
| ABHD2    | 101         | 1         | 0.99%         | 196          | 5         | 2.55%         | 2.62 [0.43-16.05]    | 0.383    | 0.750   |
| ABI3     | 101         | 4         | 3.96%         | 196          | 17        | 8.67%         | 2.30 [0.90-5.88]     | 0.143    | 0.535   |
| ABL2     | 101         | 5         | 4.95%         | 196          | 19        | 9.69%         | 2.06 [0.88-4.83]     | 0.163    | 0.535   |
| ABRA     | 101         | 17        | 16.83%        | 196          | 52        | 26.53%        | 1.78 [1.07-2.98]     | 0.063    | 0.507   |
| ACACA    | 101         | 2         | 1.98%         | 196          | 3         | 1.53%         | 0.77 [0.17-3.50]     | 0.776    | 0.996   |
| ACAN     | 101         | 1         | 0.99%         | 196          | 6         | 3.06%         | 3.16 [0.53-18.88]    | 0.290    | 0.650   |
| ACAP2    | 101         | 3         | 2.97%         | 196          | 3         | 1.53%         | 0.51 [0.13-1.98]     | 0.412    | 0.774   |
| ACBD3    | 101         | 6         | 5.94%         | 196          | 19        | 9.69%         | 1.70 [0.77-3.78]     | 0.274    | 0.643   |
| ACBD6    | 101         | 6         | 5.94%         | 196          | 19        | 9.69%         | 1.70 [0.77-3.78]     | 0.274    | 0.643   |
| ACER3    | 101         | 7         | 6.93%         | 196          | 20        | 10.20%        | 1.53 [0.72-3.24]     | 0.355    | 0.722   |
| ACE      | 101         | 8         | 7.92%         | 196          | 30        | 15.31%        | 2.10 [1.06-4.18]     | 0.076    | 0.507   |
| ACIN1    | 101         | 1         | 0.99%         | 196          | 4         | 2.04%         | 2.08 [0.33-13.25]    | 0.514    | 0.805   |
| ACOT1    | 101         | 12        | 11.88%        | 196          | 24        | 12.24%        | 1.03 [0.56-1.92]     | 0.928    | 1.000   |
| ACOT8    | 101         | 5         | 4.95%         | 196          | 4         | 2.04%         | 0.40 [0.13-1.23]     | 0.179    | 0.535   |
| ACOX1    | 101         | 4         | 3.96%         | 196          | 12        | 6.12%         | 1.58 [0.60-4.18]     | 0.438    | 0.798   |
| ACP6     | 101         | 6         | 5.94%         | 196          | 12        | 6.12%         | 1.03 [0.44-2.41]     | 0.950    | 1.000   |
| ACSF2    | 101         | 4         | 3.96%         | 196          | 19        | 9.69%         | 2.60 [1.03-6.59]     | 0.090    | 0.507   |
| ACSM1    | 101         | 5         | 4.95%         | 196          | 2         | 1.02%         | 0.20 [0.049-0.80]    | 0.056    | 0.507   |
| ACSM2A   | 101         | 4         | 3.96%         | 196          | 2         | 1.02%         | 0.25 [0.059-1.05]    | 0.113    | 0.511   |
| ACSM2B   | 101         | 5         | 4.95%         | 196          | 2         | 1.02%         | 0.20 [0.049-0.80]    | 0.056    | 0.507   |
| ACSM3    | 101         | 5         | 4.95%         | 196          | 2         | 1.02%         | 0.20 [0.049-0.80]    | 0.056    | 0.507   |
| ACSM5    | 101         | 5         | 4.95%         | 196          | 3         | 1.53%         | 0.30 [0.088-1.01]    | 0.103    | 0.507   |
| ACSS2    | 101         | 4         | 3.96%         | 196          | 7         | 3.57%         | 0.90 [0.31-2.57]     | 0.867    | 1.000   |
| ACSS3    | 101         | 1         | 0.99%         | 196          | 4         | 2.04%         | 2.08 [0.33-13.25]    | 0.514    | 0.805   |
| ACTA1    | 101         | 6         | 5.94%         | 196          | 19        | 9.69%         | 1.70 [0.77-3.78]     | 0.274    | 0.643   |
| ACTG1    | 101         | 2         | 1.98%         | 196          | 12        | 6.12%         | 3.23 [0.90-11.53]    | 0.130    | 0.535   |
| ACTL6A   | 101         | 4         | 3.96%         | 196          | 2         | 1.02%         | 0.25 [0.059-1.05]    | 0.113    | 0.511   |
| ACTN2    | 101         | 7         | 6.93%         | 196          | 19        | 9.69%         | 1.44 [0.68-3.07]     | 0.427    | 0.791   |
| ACTN3    | 101         | 5         | 4.95%         | 196          | 12        | 6.12%         | 1.25 [0.51-3.08]     | 0.681    | 0.943   |
| ACTR5    | 101         | 2         | 1.98%         | 196          | 5         | 2.55%         | 1.30 [0.32-5.21]     | 0.759    | 0.996   |
| ACY3     | 101         | 10        | 9.90%         | 196          | 19        | 9.69%         | 0.98 [0.50-1.92]     | 0.955    | 1.000   |
| ADAM15   | 101         | 8         | 7.92%         | 196          | 15        | 7.65%         | 0.96 [0.46-2.04]     | 0.935    | 1.000   |
| ADAM18   | 101         | 14        | 13.86%        | 196          | 37        | 18.88%        | 1.45 [0.83-2.53]     | 0.279    | 0.650   |
| ADAM2    | 101         | 13        | 12.87%        | 196          | 32        | 16.33%        | 1.32 [0.74-2.37]     | 0.432    | 0.798   |
| ADAM30   | 101         | 1         | 0.99%         | 196          | 4         | 2.04%         | 2.08 [0.33-13.25]    | 0.514    | 0.805   |
| ADAM32   | 101         | 12        | 11.88%        | 196          | 36        | 18.37%        | 1.67 [0.93-3.01]     | 0.153    | 0.535   |
| ADAM3A   | 101         | 25        | 24.75%        | 196          | 53        | 27.04%        | 1.13 [0.71-1.79]     | 0.671    | 0.943   |
| ADAM5    | 101         | 17        | 16.83%        | 196          | 35        | 17.86%        | 1.07 [0.63-1.83]     | 0.826    | 1.000   |
| ADAM9    | 101         | 12        | 11.88%        | 196          | 40        | 20.41%        | 1.90 [1.06-3.41]     | 0.070    | 0.507   |
| ADAMTS4  | 101         | 6         | 5.94%         | 196          | 16        | 8.16%         | 1.41 [0.62-3.18]     | 0.490    | 0.805   |
| ADAMTSL4 | 101         | 9         | 8.91%         | 196          | 17        | 8.67%         | 0.97 [0.48-1.97]     | 0.945    | 1.000   |
| ADAP2    | 101         | 2         | 1.98%         | 196          | 3         | 1.53%         | 0.77 [0.17-3.50]     | 0.776    | 0.996   |
| ADAR     | 101         | 7         | 6.93%         | 196          | 12        | 6.12%         | 0.88 [0.39-1.97]     | 0.788    | 0.996   |
| ADA      | 101         | 4         | 3.96%         | 196          | 4         | 2.04%         | 0.51 [0.16-1.65]     | 0.342    | 0.716   |

| Symbol     | CINSARC Low |           |               | CINSARC High |           |               | CINSARC High vs. Low |          |         |
|------------|-------------|-----------|---------------|--------------|-----------|---------------|----------------------|----------|---------|
|            | N tested    | N altered | Fq alteration | N tested     | N altered | Fq alteration | OR [95%CI]           | p-value* | q-value |
| ADCK2      | 101         | 1         | 0.99%         | 196          | 4         | 2.04%         | 2.08 [0.33-13.25]    | 0.514    | 0.805   |
| ADCK5      | 101         | 18        | 17.82%        | 196          | 49        | 25.00%        | 1.54 [0.93-2.55]     | 0.163    | 0.535   |
| ADCY10     | 101         | 4         | 3.96%         | 196          | 12        | 6.12%         | 1.58 [0.60-4.18]     | 0.438    | 0.798   |
| ADCY8      | 101         | 15        | 14.85%        | 196          | 55        | 28.06%        | 2.24 [1.32-3.80]     | 1.24E-02 | 0.507   |
| ADCY9      | 101         | 5         | 4.95%         | 196          | 6         | 3.06%         | 0.61 [0.22-1.68]     | 0.418    | 0.779   |
| ADCYAP1R1  | 101         | 0         | 0.00%         | 196          | 7         | 3.57%         | 3.2e+07 [0e+00-Inf]  | 0.992    | 1.000   |
| ADHFE1     | 101         | 15        | 14.85%        | 196          | 39        | 19.90%        | 1.42 [0.82-2.46]     | 0.287    | 0.650   |
| ADIG       | 101         | 4         | 3.96%         | 196          | 5         | 2.55%         | 0.63 [0.21-1.95]     | 0.505    | 0.805   |
| ADIPOR1    | 101         | 7         | 6.93%         | 196          | 28        | 14.29%        | 2.24 [1.08-4.63]     | 0.068    | 0.507   |
| ADK        | 101         | 2         | 1.98%         | 196          | 5         | 2.55%         | 1.30 [0.32-5.21]     | 0.759    | 0.996   |
| ADNP       | 101         | 6         | 5.94%         | 196          | 13        | 6.63%         | 1.12 [0.49-2.60]     | 0.817    | 1.000   |
| ADORA1     | 101         | 7         | 6.93%         | 196          | 28        | 14.29%        | 2.24 [1.08-4.63]     | 0.068    | 0.507   |
| ADRB3      | 101         | 10        | 9.90%         | 196          | 51        | 26.02%        | 3.20 [1.74-5.89]     | 1.70E-03 | 0.507   |
| ADRM1      | 101         | 6         | 5.94%         | 196          | 10        | 5.10%         | 0.85 [0.36-2.04]     | 0.762    | 0.996   |
| ADSS       | 101         | 5         | 4.95%         | 196          | 19        | 9.69%         | 2.06 [0.88-4.83]     | 0.163    | 0.535   |
| AEN        | 101         | 0         | 0.00%         | 196          | 6         | 3.06%         | 2.7e+07 [0e+00-Inf]  | 0.992    | 1.000   |
| AFMID      | 101         | 3         | 2.97%         | 196          | 17        | 8.67%         | 3.10 [1.09-8.87]     | 0.076    | 0.507   |
| AFM        | 101         | 1         | 0.99%         | 196          | 6         | 3.06%         | 3.16 [0.53-18.88]    | 0.290    | 0.650   |
| AFP        | 101         | 1         | 0.99%         | 196          | 6         | 3.06%         | 3.16 [0.53-18.88]    | 0.290    | 0.650   |
| AGAP2      | 101         | 0         | 0.00%         | 196          | 5         | 2.55%         | 2.2e+07 [0e+00-Inf]  | 0.992    | 1.000   |
| AGAP5      | 101         | 0         | 0.00%         | 196          | 5         | 2.55%         | 2.2e+07 [0e+00-Inf]  | 0.992    | 1.000   |
| AGBL1      | 101         | 1         | 0.99%         | 196          | 5         | 2.55%         | 2.62 [0.43-16.05]    | 0.383    | 0.750   |
| AGT        | 101         | 6         | 5.94%         | 196          | 19        | 9.69%         | 1.70 [0.77-3.78]     | 0.274    | 0.643   |
| AHCTF1     | 101         | 5         | 4.95%         | 196          | 19        | 9.69%         | 2.06 [0.88-4.83]     | 0.163    | 0.535   |
| AHSP       | 101         | 4         | 3.96%         | 196          | 4         | 2.04%         | 0.51 [0.16-1.65]     | 0.342    | 0.716   |
| AIDA       | 101         | 6         | 5.94%         | 196          | 19        | 9.69%         | 1.70 [0.77-3.78]     | 0.274    | 0.643   |
| AIM2       | 101         | 6         | 5.94%         | 196          | 8         | 4.08%         | 0.67 [0.27-1.68]     | 0.476    | 0.805   |
| AIP        | 101         | 11        | 10.89%        | 196          | 20        | 10.20%        | 0.93 [0.48-1.79]     | 0.854    | 1.000   |
| AKAP10     | 101         | 4         | 3.96%         | 196          | 2         | 1.02%         | 0.25 [0.059-1.05]    | 0.113    | 0.511   |
| AKAP13     | 101         | 1         | 0.99%         | 196          | 6         | 3.06%         | 3.16 [0.53-18.88]    | 0.290    | 0.650   |
| AKAP1      | 101         | 7         | 6.93%         | 196          | 25        | 12.76%        | 1.96 [0.94-4.09]     | 0.131    | 0.535   |
| AKAP6      | 101         | 1         | 0.99%         | 196          | 7         | 3.57%         | 3.70 [0.63-21.75]    | 0.224    | 0.596   |
| AKT3       | 101         | 5         | 4.95%         | 196          | 18        | 9.18%         | 1.94 [0.82-4.58]     | 0.203    | 0.570   |
| ALB        | 101         | 1         | 0.99%         | 196          | 6         | 3.06%         | 3.16 [0.53-18.88]    | 0.290    | 0.650   |
| ALDH3A1    | 101         | 4         | 3.96%         | 196          | 1         | 0.51%         | 0.12 [0.02-0.79]     | 0.064    | 0.507   |
| ALDH3A2    | 101         | 4         | 3.96%         | 196          | 1         | 0.51%         | 0.12 [0.02-0.79]     | 0.064    | 0.507   |
| ALDH3B1    | 101         | 9         | 8.91%         | 196          | 21        | 10.71%        | 1.23 [0.62-2.44]     | 0.626    | 0.907   |
| ALDH3B2    | 101         | 9         | 8.91%         | 196          | 19        | 9.69%         | 1.10 [0.55-2.21]     | 0.827    | 1.000   |
| ALDH9A1    | 101         | 4         | 3.96%         | 196          | 12        | 6.12%         | 1.58 [0.60-4.18]     | 0.438    | 0.798   |
| ALDOA      | 101         | 5         | 4.95%         | 196          | 4         | 2.04%         | 0.40 [0.13-1.23]     | 0.179    | 0.535   |
| ALDOC      | 101         | 3         | 2.97%         | 196          | 8         | 4.08%         | 1.39 [0.45-4.31]     | 0.632    | 0.909   |
| ALG1       | 101         | 5         | 4.95%         | 196          | 5         | 2.55%         | 0.50 [0.17-1.45]     | 0.286    | 0.650   |
| ALG3       | 101         | 3         | 2.97%         | 196          | 2         | 1.02%         | 0.34 [0.074-1.53]    | 0.237    | 0.599   |
| ALG8       | 101         | 9         | 8.91%         | 196          | 18        | 9.18%         | 1.03 [0.51-2.09]     | 0.938    | 1.000   |
| ALPK3      | 101         | 1         | 0.99%         | 196          | 6         | 3.06%         | 3.16 [0.53-18.88]    | 0.290    | 0.650   |
| CCL18      | 101         | 2         | 1.98%         | 196          | 5         | 2.55%         | 1.30 [0.32-5.21]     | 0.759    | 0.996   |
| AMDHD2     | 101         | 6         | 5.94%         | 196          | 5         | 2.55%         | 0.41 [0.15-1.15]     | 0.154    | 0.535   |
| AMELY      | 101         | 0         | 0.00%         | 196          | 0         | 0.00%         | 1.00 [0e+00-Inf]     | 1.000    | 1.000   |
| AMZ2P1     | 101         | 8         | 7.92%         | 196          | 23        | 11.73%        | 1.55 [0.76-3.14]     | 0.311    | 0.680   |
| AMZ2       | 101         | 10        | 9.90%         | 196          | 27        | 13.78%        | 1.45 [0.76-2.77]     | 0.340    | 0.716   |
| ANAPC11    | 101         | 2         | 1.98%         | 196          | 13        | 6.63%         | 3.52 [0.99-12.47]    | 0.102    | 0.507   |
| ANGEL2     | 101         | 6         | 5.94%         | 196          | 21        | 10.71%        | 1.90 [0.86-4.19]     | 0.181    | 0.535   |
| ANGPT1     | 101         | 15        | 14.85%        | 196          | 51        | 26.02%        | 2.02 [1.18-3.43]     | 3.03E-02 | 0.507   |
| ANGPTL1    | 101         | 5         | 4.95%         | 196          | 18        | 9.18%         | 1.94 [0.82-4.58]     | 0.203    | 0.570   |
| ANK1       | 101         | 15        | 14.85%        | 196          | 32        | 16.33%        | 1.12 [0.64-1.96]     | 0.742    | 0.996   |
| ANK3       | 101         | 0         | 0.00%         | 196          | 5         | 2.55%         | 2.2e+07 [0e+00-Inf]  | 0.992    | 1.000   |
| ANKFN1     | 101         | 9         | 8.91%         | 196          | 21        | 10.71%        | 1.23 [0.62-2.44]     | 0.626    | 0.907   |
| ANKRD13B   | 101         | 3         | 2.97%         | 196          | 5         | 2.55%         | 0.86 [0.25-2.89]     | 0.833    | 1.000   |
| ANKRD13D   | 101         | 10        | 9.90%         | 196          | 16        | 8.16%         | 0.81 [0.40-1.62]     | 0.616    | 0.898   |
| ANKRD17    | 101         | 1         | 0.99%         | 196          | 7         | 3.57%         | 3.70 [0.63-21.75]    | 0.224    | 0.596   |
| ANKRD34A   | 101         | 5         | 4.95%         | 196          | 10        | 5.10%         | 1.03 [0.41-2.60]     | 0.955    | 1.000   |
| ANKRD35    | 101         | 5         | 4.95%         | 196          | 10        | 5.10%         | 1.03 [0.41-2.60]     | 0.955    | 1.000   |
| ANKRD36BP1 | 101         | 4         | 3.96%         | 196          | 13        | 6.63%         | 1.72 [0.66-4.51]     | 0.353    | 0.722   |
| ANKRD40    | 101         | 4         | 3.96%         | 196          | 21        | 10.71%        | 2.91 [1.16-7.31]     | 0.056    | 0.507   |
| ANKRD45    | 101         | 5         | 4.95%         | 196          | 13        | 6.63%         | 1.36 [0.56-3.32]     | 0.566    | 0.852   |
| ANKRD46    | 101         | 15        | 14.85%        | 196          | 55        | 28.06%        | 2.24 [1.32-3.80]     | 1.24E-02 | 0.507   |
| ANKS3      | 101         | 5         | 4.95%         | 196          | 5         | 2.55%         | 0.50 [0.17-1.45]     | 0.286    | 0.650   |
| ANKS4B     | 101         | 5         | 4.95%         | 196          | 2         | 1.02%         | 0.20 [0.049-0.80]    | 0.056    | 0.507   |
| ANO1       | 101         | 21        | 20.79%        | 196          | 57        | 29.08%        | 1.56 [0.97-2.52]     | 0.126    | 0.535   |
| ANO5       | 101         | 3         | 2.97%         | 196          | 2         | 1.02%         | 0.34 [0.074-1.53]    | 0.237    | 0.599   |
| ANP32E     | 101         | 8         | 7.92%         | 196          | 15        | 7.65%         | 0.96 [0.46-2.04]     | 0.935    | 1.000   |

| Symbol    | CINSARC Low |           |               | CINSARC High |           |               | CINSARC High vs. Low |          |         |
|-----------|-------------|-----------|---------------|--------------|-----------|---------------|----------------------|----------|---------|
|           | N tested    | N altered | Fq alteration | N tested     | N altered | Fq alteration | OR [95%CI]           | p-value* | q-value |
| ANPEP     | 101         | 1         | 0.99%         | 196          | 8         | 4.08%         | 4.26 [0.73-24.65]    | 0.175    | 0.535   |
| ANTXR1    | 101         | 1         | 0.99%         | 196          | 5         | 2.55%         | 2.62 [0.43-16.05]    | 0.383    | 0.750   |
| ANXA13    | 101         | 14        | 13.86%        | 196          | 57        | 29.08%        | 2.55 [1.49-4.37]     | 4.36E-03 | 0.507   |
| ANXA7     | 101         | 0         | 0.00%         | 196          | 5         | 2.55%         | 2.2e+07 [0e+00-Inf]  | 0.992    | 1.000   |
| ANXA9     | 101         | 7         | 6.93%         | 196          | 15        | 7.65%         | 1.11 [0.51-2.43]     | 0.822    | 1.000   |
| AP2B1     | 101         | 2         | 1.98%         | 196          | 4         | 2.04%         | 1.03 [0.24-4.35]     | 0.972    | 1.000   |
| AP2M1     | 101         | 3         | 2.97%         | 196          | 2         | 1.02%         | 0.34 [0.074-1.53]    | 0.237    | 0.599   |
| AP3B2     | 101         | 1         | 0.99%         | 196          | 4         | 2.04%         | 2.08 [0.33-13.25]    | 0.514    | 0.805   |
| AP3M1     | 101         | 0         | 0.00%         | 196          | 5         | 2.55%         | 2.2e+07 [0e+00-Inf]  | 0.992    | 1.000   |
| AP3M2     | 101         | 14        | 13.86%        | 196          | 33        | 16.84%        | 1.26 [0.71-2.22]     | 0.506    | 0.805   |
| AP3S2     | 101         | 1         | 0.99%         | 196          | 9         | 4.59%         | 4.81 [0.84-27.58]    | 0.139    | 0.535   |
| AP4S1     | 101         | 0         | 0.00%         | 196          | 7         | 3.57%         | 3.2e+07 [0e+00-Inf]  | 0.992    | 1.000   |
| APCDD1L   | 101         | 8         | 7.92%         | 196          | 17        | 8.67%         | 1.10 [0.53-2.30]     | 0.825    | 1.000   |
| APCS      | 101         | 6         | 5.94%         | 196          | 10        | 5.10%         | 0.85 [0.36-2.04]     | 0.762    | 0.996   |
| APH1A     | 101         | 8         | 7.92%         | 196          | 15        | 7.65%         | 0.96 [0.46-2.04]     | 0.935    | 1.000   |
| APOA2     | 101         | 6         | 5.94%         | 196          | 16        | 8.16%         | 1.41 [0.62-3.18]     | 0.490    | 0.805   |
| APOBR     | 101         | 5         | 4.95%         | 196          | 3         | 1.53%         | 0.30 [0.088-1.01]    | 0.103    | 0.507   |
| APOBEC4   | 101         | 5         | 4.95%         | 196          | 20        | 10.20%        | 2.18 [0.93-5.10]     | 0.130    | 0.535   |
| APOD      | 101         | 2         | 1.98%         | 196          | 4         | 2.04%         | 1.03 [0.24-4.35]     | 0.972    | 1.000   |
| APOH      | 101         | 9         | 8.91%         | 196          | 25        | 12.76%        | 1.49 [0.76-2.93]     | 0.327    | 0.712   |
| APPBP2    | 101         | 8         | 7.92%         | 196          | 34        | 17.35%        | 2.44 [1.23-4.82]     | 3.12E-02 | 0.507   |
| AQP10     | 101         | 7         | 6.93%         | 196          | 12        | 6.12%         | 0.88 [0.39-1.97]     | 0.788    | 0.996   |
| AQP11     | 101         | 10        | 9.90%         | 196          | 22        | 11.22%        | 1.15 [0.59-2.23]     | 0.728    | 0.986   |
| AQP1      | 101         | 0         | 0.00%         | 196          | 7         | 3.57%         | 3.2e+07 [0e+00-Inf]  | 0.992    | 1.000   |
| AQP8      | 101         | 5         | 4.95%         | 196          | 4         | 2.04%         | 0.40 [0.13-1.23]     | 0.179    | 0.535   |
| ARAP1     | 101         | 5         | 4.95%         | 196          | 10        | 5.10%         | 1.03 [0.41-2.60]     | 0.955    | 1.000   |
| ARC       | 101         | 16        | 15.84%        | 196          | 49        | 25.00%        | 1.77 [1.05-2.99]     | 0.073    | 0.507   |
| AREG      | 101         | 2         | 1.98%         | 196          | 3         | 1.53%         | 0.77 [0.17-3.50]     | 0.776    | 0.996   |
| ARF1      | 101         | 6         | 5.94%         | 196          | 21        | 10.71%        | 1.90 [0.86-4.19]     | 0.181    | 0.535   |
| ARFGAP1   | 101         | 7         | 6.93%         | 196          | 13        | 6.63%         | 0.95 [0.43-2.12]     | 0.923    | 1.000   |
| ARFGEF1   | 101         | 15        | 14.85%        | 196          | 39        | 19.90%        | 1.42 [0.82-2.46]     | 0.287    | 0.650   |
| ARFGEF2   | 101         | 6         | 5.94%         | 196          | 8         | 4.08%         | 0.67 [0.27-1.68]     | 0.476    | 0.805   |
| ARFRP1    | 101         | 7         | 6.93%         | 196          | 15        | 7.65%         | 1.11 [0.51-2.43]     | 0.822    | 1.000   |
| ARHGAP17  | 101         | 5         | 4.95%         | 196          | 3         | 1.53%         | 0.30 [0.088-1.01]    | 0.103    | 0.507   |
| ARHGAP23  | 101         | 5         | 4.95%         | 196          | 7         | 3.57%         | 0.71 [0.27-1.90]     | 0.569    | 0.855   |
| ARHGAP30  | 101         | 6         | 5.94%         | 196          | 17        | 8.67%         | 1.50 [0.67-3.38]     | 0.407    | 0.774   |
| ARHGAP39  | 101         | 17        | 16.83%        | 196          | 49        | 25.00%        | 1.65 [0.98-2.76]     | 0.111    | 0.511   |
| ARHGAP5   | 101         | 1         | 0.99%         | 196          | 7         | 3.57%         | 3.70 [0.63-21.75]    | 0.224    | 0.596   |
| ARHGDI1   | 101         | 2         | 1.98%         | 196          | 13        | 6.63%         | 3.52 [0.99-12.47]    | 0.102    | 0.507   |
| ARHGDI2   | 101         | 7         | 6.93%         | 196          | 4         | 2.04%         | 0.28 [0.098-0.80]    | 4.63E-02 | 0.507   |
| ARHGFE1   | 101         | 6         | 5.94%         | 196          | 8         | 4.08%         | 0.67 [0.27-1.68]     | 0.476    | 0.805   |
| ARHGFE2   | 101         | 7         | 6.93%         | 196          | 11        | 5.61%         | 0.80 [0.35-1.82]     | 0.652    | 0.928   |
| ARHGFE3   | 101         | 7         | 6.93%         | 196          | 9         | 4.59%         | 0.65 [0.27-1.52]     | 0.401    | 0.774   |
| ARID3C    | 101         | 1         | 0.99%         | 196          | 4         | 2.04%         | 2.08 [0.33-13.25]    | 0.514    | 0.805   |
| ARID4B    | 101         | 7         | 6.93%         | 196          | 20        | 10.20%        | 1.53 [0.72-3.24]     | 0.355    | 0.722   |
| ARL16     | 101         | 2         | 1.98%         | 196          | 12        | 6.12%         | 3.23 [0.90-11.53]    | 0.130    | 0.535   |
| ARL17B    | 101         | 8         | 7.92%         | 196          | 10        | 5.10%         | 0.63 [0.28-1.40]     | 0.338    | 0.716   |
| ARL5C     | 101         | 4         | 3.96%         | 196          | 12        | 6.12%         | 1.58 [0.60-4.18]     | 0.438    | 0.798   |
| ARL6IP1   | 101         | 5         | 4.95%         | 196          | 4         | 2.04%         | 0.40 [0.13-1.23]     | 0.179    | 0.535   |
| ARL8A     | 101         | 8         | 7.92%         | 196          | 24        | 12.24%        | 1.62 [0.80-3.28]     | 0.258    | 0.635   |
| ARMC1     | 101         | 15        | 14.85%        | 196          | 35        | 17.86%        | 1.25 [0.72-2.17]     | 0.512    | 0.805   |
| ARMC2     | 101         | 1         | 0.99%         | 196          | 4         | 2.04%         | 2.08 [0.33-13.25]    | 0.514    | 0.805   |
| ARMC5     | 101         | 4         | 3.96%         | 196          | 4         | 2.04%         | 0.51 [0.16-1.65]     | 0.342    | 0.716   |
| ARMC7     | 101         | 5         | 4.95%         | 196          | 12        | 6.12%         | 1.25 [0.51-3.08]     | 0.681    | 0.943   |
| ARNT2     | 101         | 2         | 1.98%         | 196          | 4         | 2.04%         | 1.03 [0.24-4.35]     | 0.972    | 1.000   |
| ARNT      | 101         | 8         | 7.92%         | 196          | 15        | 7.65%         | 0.96 [0.46-2.04]     | 0.935    | 1.000   |
| ARPC5     | 101         | 5         | 4.95%         | 196          | 20        | 10.20%        | 2.18 [0.93-5.10]     | 0.130    | 0.535   |
| ARRB1     | 101         | 5         | 4.95%         | 196          | 15        | 7.65%         | 1.59 [0.66-3.81]     | 0.382    | 0.750   |
| ARRDC4    | 101         | 0         | 0.00%         | 196          | 9         | 4.59%         | 4.1e+07 [0e+00-Inf]  | 0.992    | 1.000   |
| ARSG      | 101         | 9         | 8.91%         | 196          | 28        | 14.29%        | 1.70 [0.88-3.31]     | 0.188    | 0.553   |
| ART3      | 101         | 1         | 0.99%         | 196          | 5         | 2.55%         | 2.62 [0.43-16.05]    | 0.383    | 0.750   |
| ARV1      | 101         | 6         | 5.94%         | 196          | 19        | 9.69%         | 1.70 [0.77-3.78]     | 0.274    | 0.643   |
| ASAP1-IT1 | 101         | 15        | 14.85%        | 196          | 60        | 30.61%        | 2.53 [1.49-4.28]     | 3.72E-03 | 0.507   |
| ASAP1     | 101         | 15        | 14.85%        | 196          | 58        | 29.59%        | 2.41 [1.42-4.08]     | 6.08E-03 | 0.507   |
| ASB7      | 101         | 1         | 0.99%         | 196          | 4         | 2.04%         | 2.08 [0.33-13.25]    | 0.514    | 0.805   |
| ASH1L     | 101         | 6         | 5.94%         | 196          | 11        | 5.61%         | 0.94 [0.40-2.23]     | 0.908    | 1.000   |
| ASH2L     | 101         | 11        | 10.89%        | 196          | 47        | 23.98%        | 2.58 [1.43-4.67]     | 8.55E-03 | 0.507   |
| ASPHD1    | 101         | 5         | 4.95%         | 196          | 4         | 2.04%         | 0.40 [0.13-1.23]     | 0.179    | 0.535   |
| ASPH      | 101         | 15        | 14.85%        | 196          | 32        | 16.33%        | 1.12 [0.64-1.96]     | 0.742    | 0.996   |
| ASPM      | 101         | 5         | 4.95%         | 196          | 21        | 10.71%        | 2.30 [0.99-5.36]     | 0.104    | 0.507   |
| ASPSR1    | 101         | 2         | 1.98%         | 196          | 13        | 6.63%         | 3.52 [0.99-12.47]    | 0.102    | 0.507   |

| Symbol    | CINSARC Low |           |               | CINSARC High |           |               | CINSARC High vs. Low |          |         |
|-----------|-------------|-----------|---------------|--------------|-----------|---------------|----------------------|----------|---------|
|           | N tested    | N altered | Fq alteration | N tested     | N altered | Fq alteration | OR [95%CI]           | p-value* | q-value |
| ASTN1     | 101         | 6         | 5.94%         | 196          | 16        | 8.16%         | 1.41 [0.62-3.18]     | 0.490    | 0.805   |
| ATAD2     | 101         | 14        | 13.86%        | 196          | 58        | 29.59%        | 2.61 [1.52-4.48]     | 3.40E-03 | 0.507   |
| ATAD5     | 101         | 2         | 1.98%         | 196          | 3         | 1.53%         | 0.77 [0.17-3.50]     | 0.776    | 0.996   |
| ATF3      | 101         | 6         | 5.94%         | 196          | 21        | 10.71%        | 1.90 [0.86-4.19]     | 0.181    | 0.535   |
| ATF6      | 101         | 5         | 4.95%         | 196          | 17        | 8.67%         | 1.82 [0.77-4.32]     | 0.252    | 0.623   |
| ATF7IP2   | 101         | 5         | 4.95%         | 196          | 4         | 2.04%         | 0.40 [0.13-1.23]     | 0.179    | 0.535   |
| ATG16L2   | 101         | 5         | 4.95%         | 196          | 10        | 5.10%         | 1.03 [0.41-2.60]     | 0.955    | 1.000   |
| ATG5      | 101         | 2         | 1.98%         | 196          | 7         | 3.57%         | 1.83 [0.48-6.96]     | 0.455    | 0.805   |
| ATP11B    | 101         | 3         | 2.97%         | 196          | 2         | 1.02%         | 0.34 [0.074-1.53]    | 0.237    | 0.599   |
| ATP13A3   | 101         | 3         | 2.97%         | 196          | 3         | 1.53%         | 0.51 [0.13-1.98]     | 0.412    | 0.774   |
| ATP13A4   | 101         | 3         | 2.97%         | 196          | 3         | 1.53%         | 0.51 [0.13-1.98]     | 0.412    | 0.774   |
| ATP13A5   | 101         | 3         | 2.97%         | 196          | 3         | 1.53%         | 0.51 [0.13-1.98]     | 0.412    | 0.774   |
| ATP1A2    | 101         | 6         | 5.94%         | 196          | 12        | 6.12%         | 1.03 [0.44-2.41]     | 0.950    | 1.000   |
| ATP1A4    | 101         | 6         | 5.94%         | 196          | 12        | 6.12%         | 1.03 [0.44-2.41]     | 0.950    | 1.000   |
| ATP1B1    | 101         | 5         | 4.95%         | 196          | 12        | 6.12%         | 1.25 [0.51-3.08]     | 0.681    | 0.943   |
| ATP2A1    | 101         | 6         | 5.94%         | 196          | 3         | 1.53%         | 0.25 [0.076-0.80]    | 0.051    | 0.507   |
| ATP2B4    | 101         | 7         | 6.93%         | 196          | 28        | 14.29%        | 2.24 [1.08-4.63]     | 0.068    | 0.507   |
| ATP6V0C   | 101         | 6         | 5.94%         | 196          | 5         | 2.55%         | 0.41 [0.15-1.15]     | 0.154    | 0.535   |
| ATP6V0D2  | 101         | 18        | 17.82%        | 196          | 46        | 23.47%        | 1.41 [0.85-2.35]     | 0.263    | 0.643   |
| ATP6V1C1  | 101         | 16        | 15.84%        | 196          | 56        | 28.57%        | 2.13 [1.27-3.57]     | 1.67E-02 | 0.507   |
| ATP6V1G3  | 101         | 5         | 4.95%         | 196          | 22        | 11.22%        | 2.43 [1.05-5.63]     | 0.083    | 0.507   |
| ATP6V1H   | 101         | 12        | 11.88%        | 196          | 31        | 15.82%        | 1.39 [0.77-2.54]     | 0.363    | 0.738   |
| ATP8B2    | 101         | 7         | 6.93%         | 196          | 12        | 6.12%         | 0.88 [0.39-1.97]     | 0.788    | 0.996   |
| ATP9A     | 101         | 6         | 5.94%         | 196          | 19        | 9.69%         | 1.70 [0.77-3.78]     | 0.274    | 0.643   |
| ATXN2L    | 101         | 6         | 5.94%         | 196          | 3         | 1.53%         | 0.25 [0.076-0.80]    | 0.051    | 0.507   |
| ATXN7L3B  | 101         | 1         | 0.99%         | 196          | 7         | 3.57%         | 3.70 [0.63-21.75]    | 0.224    | 0.596   |
| AURKA     | 101         | 8         | 7.92%         | 196          | 13        | 6.63%         | 0.83 [0.38-1.78]     | 0.682    | 0.943   |
| AVIL      | 101         | 0         | 0.00%         | 196          | 5         | 2.55%         | 2.2e+07 [0e+00-Inf]  | 0.992    | 1.000   |
| AVL9      | 101         | 0         | 0.00%         | 196          | 7         | 3.57%         | 3.2e+07 [0e+00-Inf]  | 0.992    | 1.000   |
| AVPR1A    | 101         | 1         | 0.99%         | 196          | 5         | 2.55%         | 2.62 [0.43-16.05]    | 0.383    | 0.750   |
| AVPR1B    | 101         | 6         | 5.94%         | 196          | 24        | 12.24%        | 2.21 [1.01-4.82]     | 0.095    | 0.507   |
| AXIN1     | 101         | 7         | 6.93%         | 196          | 4         | 2.04%         | 0.28 [0.098-0.80]    | 4.63E-02 | 0.507   |
| AXIN2     | 101         | 9         | 8.91%         | 196          | 27        | 13.78%        | 1.63 [0.84-3.19]     | 0.227    | 0.599   |
| AZIN1     | 101         | 16        | 15.84%        | 196          | 56        | 28.57%        | 2.13 [1.27-3.57]     | 1.67E-02 | 0.507   |
| B3GALNT2  | 101         | 7         | 6.93%         | 196          | 20        | 10.20%        | 1.53 [0.72-3.24]     | 0.355    | 0.722   |
| B3GALT2   | 101         | 5         | 4.95%         | 196          | 18        | 9.18%         | 1.94 [0.82-4.58]     | 0.203    | 0.570   |
| B3GNT5    | 101         | 3         | 2.97%         | 196          | 2         | 1.02%         | 0.34 [0.074-1.53]    | 0.237    | 0.599   |
| B3GNT6    | 101         | 7         | 6.93%         | 196          | 20        | 10.20%        | 1.53 [0.72-3.24]     | 0.355    | 0.722   |
| B3GNTL1   | 101         | 2         | 1.98%         | 196          | 15        | 7.65%         | 4.10 [1.17-14.39]    | 0.064    | 0.507   |
| B4GALNT2  | 101         | 3         | 2.97%         | 196          | 17        | 8.67%         | 3.10 [1.09-8.87]     | 0.076    | 0.507   |
| B4GALT3   | 101         | 6         | 5.94%         | 196          | 16        | 8.16%         | 1.41 [0.62-3.18]     | 0.490    | 0.805   |
| B4GALT5   | 101         | 7         | 6.93%         | 196          | 14        | 7.14%         | 1.03 [0.47-2.28]     | 0.946    | 1.000   |
| B9D1      | 101         | 4         | 3.96%         | 196          | 2         | 1.02%         | 0.25 [0.059-1.05]    | 0.113    | 0.511   |
| BAALC     | 101         | 16        | 15.84%        | 196          | 57        | 29.08%        | 2.18 [1.30-3.66]     | 1.33E-02 | 0.507   |
| BAG4      | 101         | 11        | 10.89%        | 196          | 47        | 23.98%        | 2.58 [1.43-4.67]     | 8.55E-03 | 0.507   |
| BAHCC1    | 101         | 2         | 1.98%         | 196          | 12        | 6.12%         | 3.23 [0.90-11.53]    | 0.130    | 0.535   |
| BAIAP2    | 101         | 2         | 1.98%         | 196          | 12        | 6.12%         | 3.23 [0.90-11.53]    | 0.130    | 0.535   |
| BAIAP3    | 101         | 6         | 5.94%         | 196          | 5         | 2.55%         | 0.41 [0.15-1.15]     | 0.154    | 0.535   |
| PRRC2C    | 101         | 5         | 4.95%         | 196          | 13        | 6.63%         | 1.36 [0.56-3.32]     | 0.566    | 0.852   |
| BATF3     | 101         | 6         | 5.94%         | 196          | 21        | 10.71%        | 1.90 [0.86-4.19]     | 0.181    | 0.535   |
| BAZ1A     | 101         | 0         | 0.00%         | 196          | 8         | 4.08%         | 3.6e+07 [0e+00-Inf]  | 0.992    | 1.000   |
| BBS10     | 101         | 1         | 0.99%         | 196          | 6         | 3.06%         | 3.16 [0.53-18.88]    | 0.290    | 0.650   |
| BBS1      | 101         | 5         | 4.95%         | 196          | 11        | 5.61%         | 1.14 [0.46-2.84]     | 0.811    | 1.000   |
| BBS9      | 101         | 0         | 0.00%         | 196          | 8         | 4.08%         | 3.6e+07 [0e+00-Inf]  | 0.992    | 1.000   |
| BCAN      | 101         | 7         | 6.93%         | 196          | 8         | 4.08%         | 0.57 [0.24-1.37]     | 0.294    | 0.650   |
| BCAR4     | 101         | 5         | 4.95%         | 196          | 3         | 1.53%         | 0.30 [0.088-1.01]    | 0.103    | 0.507   |
| BCAS1     | 101         | 11        | 10.89%        | 196          | 22        | 11.22%        | 1.03 [0.54-1.97]     | 0.931    | 1.000   |
| BCAS3     | 101         | 6         | 5.94%         | 196          | 33        | 16.84%        | 3.21 [1.50-6.86]     | 1.17E-02 | 0.507   |
| BCAS4     | 101         | 5         | 4.95%         | 196          | 14        | 7.14%         | 1.48 [0.61-3.57]     | 0.467    | 0.805   |
| BCKDK     | 101         | 4         | 3.96%         | 196          | 5         | 2.55%         | 0.63 [0.21-1.95]     | 0.505    | 0.805   |
| BCL2      | 101         | 3         | 2.97%         | 196          | 2         | 1.02%         | 0.34 [0.074-1.53]    | 0.237    | 0.599   |
| BCL7C     | 101         | 4         | 3.96%         | 196          | 5         | 2.55%         | 0.63 [0.21-1.95]     | 0.505    | 0.805   |
| NBEAP1    | 101         | 1         | 0.99%         | 196          | 4         | 2.04%         | 2.08 [0.33-13.25]    | 0.514    | 0.805   |
| BCL9      | 101         | 6         | 5.94%         | 196          | 12        | 6.12%         | 1.03 [0.44-2.41]     | 0.950    | 1.000   |
| BCORP1    | 101         | 0         | 0.00%         | 196          | 0         | 0.00%         | 1.00 [0e+00-Inf]     | 1.000    | 1.000   |
| BDH1      | 101         | 3         | 2.97%         | 196          | 4         | 2.04%         | 0.68 [0.19-2.43]     | 0.619    | 0.898   |
| BEND3     | 101         | 1         | 0.99%         | 196          | 9         | 4.59%         | 4.81 [0.84-27.58]    | 0.139    | 0.535   |
| BEST3     | 101         | 2         | 1.98%         | 196          | 15        | 7.65%         | 4.10 [1.17-14.39]    | 0.064    | 0.507   |
| LINC00293 | 101         | 12        | 11.88%        | 196          | 26        | 13.27%        | 1.13 [0.61-2.09]     | 0.735    | 0.993   |
| BFAR      | 101         | 7         | 6.93%         | 196          | 3         | 1.53%         | 0.21 [0.066-0.66]    | 2.55E-02 | 0.507   |
| BGLAP     | 101         | 6         | 5.94%         | 196          | 9         | 4.59%         | 0.76 [0.31-1.86]     | 0.616    | 0.898   |

| Symbol      | CINSARC Low |           |               | CINSARC High |           |               | CINSARC High vs. Low |          |         |
|-------------|-------------|-----------|---------------|--------------|-----------|---------------|----------------------|----------|---------|
|             | N tested    | N altered | Fq alteration | N tested     | N altered | Fq alteration | OR [95%CI]           | p-value* | q-value |
| BHLHE22     | 101         | 14        | 13.86%        | 196          | 35        | 17.86%        | 1.35 [0.77-2.38]     | 0.381    | 0.750   |
| BHLHE23     | 101         | 7         | 6.93%         | 196          | 13        | 6.63%         | 0.95 [0.43-2.12]     | 0.923    | 1.000   |
| BIRC5       | 101         | 3         | 2.97%         | 196          | 17        | 8.67%         | 3.10 [1.09-8.87]     | 0.076    | 0.507   |
| BIRC7       | 101         | 7         | 6.93%         | 196          | 13        | 6.63%         | 0.95 [0.43-2.12]     | 0.923    | 1.000   |
| BLCAP       | 101         | 5         | 4.95%         | 196          | 3         | 1.53%         | 0.30 [0.088-1.01]    | 0.103    | 0.507   |
| BLMH        | 101         | 2         | 1.98%         | 196          | 5         | 2.55%         | 1.30 [0.32-5.21]     | 0.759    | 0.996   |
| BLM         | 101         | 1         | 0.99%         | 196          | 6         | 3.06%         | 3.16 [0.53-18.88]    | 0.290    | 0.650   |
| BLZF1       | 101         | 4         | 3.96%         | 196          | 13        | 6.63%         | 1.72 [0.66-4.51]     | 0.353    | 0.722   |
| BMP7        | 101         | 8         | 7.92%         | 196          | 17        | 8.67%         | 1.10 [0.53-2.30]     | 0.825    | 1.000   |
| BMPER       | 101         | 0         | 0.00%         | 196          | 5         | 2.55%         | 2.2e+07 [0e+00-Inf]  | 0.992    | 1.000   |
| BMS1P4      | 101         | 0         | 0.00%         | 196          | 5         | 2.55%         | 2.2e+07 [0e+00-Inf]  | 0.992    | 1.000   |
| BNIP1       | 101         | 7         | 6.93%         | 196          | 14        | 7.14%         | 1.03 [0.47-2.28]     | 0.946    | 1.000   |
| BOD1        | 101         | 2         | 1.98%         | 196          | 3         | 1.53%         | 0.77 [0.17-3.50]     | 0.776    | 0.996   |
| BOLA1       | 101         | 6         | 5.94%         | 196          | 14        | 7.14%         | 1.22 [0.53-2.79]     | 0.696    | 0.951   |
| BOLA2       | 101         | 4         | 3.96%         | 196          | 4         | 2.04%         | 0.51 [0.16-1.65]     | 0.342    | 0.716   |
| BOP1        | 101         | 19        | 18.81%        | 196          | 50        | 25.51%        | 1.48 [0.90-2.43]     | 0.197    | 0.570   |
| BPI         | 101         | 4         | 3.96%         | 196          | 4         | 2.04%         | 0.51 [0.16-1.65]     | 0.342    | 0.716   |
| BPNT1       | 101         | 6         | 5.94%         | 196          | 20        | 10.20%        | 1.80 [0.81-3.98]     | 0.224    | 0.596   |
| BPTF        | 101         | 10        | 9.90%         | 196          | 27        | 13.78%        | 1.45 [0.76-2.77]     | 0.340    | 0.716   |
| BPY2        | 101         | 0         | 0.00%         | 196          | 0         | 0.00%         | 1.00 [0e+00-Inf]     | 1.000    | 1.000   |
| BRAF        | 101         | 1         | 0.99%         | 196          | 4         | 2.04%         | 2.08 [0.33-13.25]    | 0.514    | 0.805   |
| BREA2       | 101         | 17        | 16.83%        | 196          | 51        | 26.02%        | 1.74 [1.04-2.90]     | 0.076    | 0.507   |
| BRF2        | 101         | 11        | 10.89%        | 196          | 51        | 26.02%        | 2.88 [1.60-5.19]     | 3.19E-03 | 0.507   |
| BRIP1       | 101         | 9         | 8.91%         | 196          | 29        | 14.80%        | 1.78 [0.91-3.44]     | 0.155    | 0.535   |
| BRMS1L      | 101         | 0         | 0.00%         | 196          | 9         | 4.59%         | 4.1e+07 [0e+00-Inf]  | 0.992    | 1.000   |
| BRMS1       | 101         | 4         | 3.96%         | 196          | 7         | 3.57%         | 0.90 [0.31-2.57]     | 0.867    | 1.000   |
| MPC2        | 101         | 4         | 3.96%         | 196          | 12        | 6.12%         | 1.58 [0.60-4.18]     | 0.438    | 0.798   |
| BRSK1       | 101         | 1         | 0.99%         | 196          | 4         | 2.04%         | 2.08 [0.33-13.25]    | 0.514    | 0.805   |
| SLX4        | 101         | 5         | 4.95%         | 196          | 4         | 2.04%         | 0.40 [0.13-1.23]     | 0.179    | 0.535   |
| BTBD17      | 101         | 7         | 6.93%         | 196          | 14        | 7.14%         | 1.03 [0.47-2.28]     | 0.946    | 1.000   |
| BTC         | 101         | 2         | 1.98%         | 196          | 3         | 1.53%         | 0.77 [0.17-3.50]     | 0.776    | 0.996   |
| BTG1        | 101         | 0         | 0.00%         | 196          | 5         | 2.55%         | 2.2e+07 [0e+00-Inf]  | 0.992    | 1.000   |
| BTG2        | 101         | 7         | 6.93%         | 196          | 28        | 14.29%        | 2.24 [1.08-4.63]     | 0.068    | 0.507   |
| BTNL3       | 101         | 1         | 0.99%         | 196          | 4         | 2.04%         | 2.08 [0.33-13.25]    | 0.514    | 0.805   |
| BVES        | 101         | 1         | 0.99%         | 196          | 6         | 3.06%         | 3.16 [0.53-18.88]    | 0.290    | 0.650   |
| C10orf105   | 101         | 0         | 0.00%         | 196          | 5         | 2.55%         | 2.2e+07 [0e+00-Inf]  | 0.992    | 1.000   |
| ZNF503-AS2  | 101         | 2         | 1.98%         | 196          | 5         | 2.55%         | 1.30 [0.32-5.21]     | 0.759    | 0.996   |
| C10orf55    | 101         | 0         | 0.00%         | 196          | 5         | 2.55%         | 2.2e+07 [0e+00-Inf]  | 0.992    | 1.000   |
| C11orf24    | 101         | 8         | 7.92%         | 196          | 18        | 9.18%         | 1.18 [0.57-2.44]     | 0.715    | 0.972   |
| KIAA1549L   | 101         | 1         | 0.99%         | 196          | 4         | 2.04%         | 2.08 [0.33-13.25]    | 0.514    | 0.805   |
| ANAPC15     | 101         | 4         | 3.96%         | 196          | 6         | 3.06%         | 0.77 [0.26-2.26]     | 0.685    | 0.943   |
| C11orf58    | 101         | 1         | 0.99%         | 196          | 4         | 2.04%         | 2.08 [0.33-13.25]    | 0.514    | 0.805   |
| LAMTOR1     | 101         | 4         | 3.96%         | 196          | 6         | 3.06%         | 0.77 [0.26-2.26]     | 0.685    | 0.943   |
| PPP1R32     | 101         | 1         | 0.99%         | 196          | 5         | 2.55%         | 2.62 [0.43-16.05]    | 0.383    | 0.750   |
| AAMDC       | 101         | 10        | 9.90%         | 196          | 22        | 11.22%        | 1.15 [0.59-2.23]     | 0.728    | 0.986   |
| C11orf80    | 101         | 8         | 7.92%         | 196          | 13        | 6.63%         | 0.83 [0.38-1.78]     | 0.682    | 0.943   |
| C11orf86    | 101         | 7         | 6.93%         | 196          | 12        | 6.12%         | 0.88 [0.39-1.97]     | 0.788    | 0.996   |
| C12orf29    | 101         | 0         | 0.00%         | 196          | 5         | 2.55%         | 2.2e+07 [0e+00-Inf]  | 0.992    | 1.000   |
| C12orf50    | 101         | 0         | 0.00%         | 196          | 5         | 2.55%         | 2.2e+07 [0e+00-Inf]  | 0.992    | 1.000   |
| C12orf66    | 101         | 1         | 0.99%         | 196          | 5         | 2.55%         | 2.62 [0.43-16.05]    | 0.383    | 0.750   |
| C12orf74    | 101         | 0         | 0.00%         | 196          | 5         | 2.55%         | 2.2e+07 [0e+00-Inf]  | 0.992    | 1.000   |
| DTD2        | 101         | 1         | 0.99%         | 196          | 8         | 4.08%         | 4.26 [0.73-24.65]    | 0.175    | 0.535   |
| ARHGAP5-AS1 | 101         | 1         | 0.99%         | 196          | 6         | 3.06%         | 3.16 [0.53-18.88]    | 0.290    | 0.650   |
| SPTSSA      | 101         | 0         | 0.00%         | 196          | 8         | 4.08%         | 3.6e+07 [0e+00-Inf]  | 0.992    | 1.000   |
| IGBP1P1     | 101         | 0         | 0.00%         | 196          | 9         | 4.59%         | 4.1e+07 [0e+00-Inf]  | 0.992    | 1.000   |
| C15orf32    | 101         | 0         | 0.00%         | 196          | 7         | 3.57%         | 3.2e+07 [0e+00-Inf]  | 0.992    | 1.000   |
| HEXA-AS1    | 101         | 1         | 0.99%         | 196          | 4         | 2.04%         | 2.08 [0.33-13.25]    | 0.514    | 0.805   |
| TICRR       | 101         | 1         | 0.99%         | 196          | 7         | 3.57%         | 3.70 [0.63-21.75]    | 0.224    | 0.596   |
| DNM1P46     | 101         | 1         | 0.99%         | 196          | 5         | 2.55%         | 2.62 [0.43-16.05]    | 0.383    | 0.750   |
| GDPGP1      | 101         | 2         | 1.98%         | 196          | 7         | 3.57%         | 1.83 [0.48-6.96]     | 0.455    | 0.805   |
| TSR3        | 101         | 6         | 5.94%         | 196          | 5         | 2.55%         | 0.41 [0.15-1.15]     | 0.154    | 0.535   |
| PAGR1       | 101         | 5         | 4.95%         | 196          | 3         | 1.53%         | 0.30 [0.088-1.01]    | 0.103    | 0.507   |
| C16orf54    | 101         | 5         | 4.95%         | 196          | 3         | 1.53%         | 0.30 [0.088-1.01]    | 0.103    | 0.507   |
| C16orf58    | 101         | 4         | 3.96%         | 196          | 4         | 2.04%         | 0.51 [0.16-1.65]     | 0.342    | 0.716   |
| CDIP1       | 101         | 5         | 4.95%         | 196          | 6         | 3.06%         | 0.61 [0.22-1.68]     | 0.418    | 0.779   |
| FOPNL       | 101         | 8         | 7.92%         | 196          | 3         | 1.53%         | 0.18 [0.058-0.56]    | 1.30E-02 | 0.507   |
| METTL22     | 101         | 5         | 4.95%         | 196          | 5         | 2.55%         | 0.50 [0.17-1.45]     | 0.286    | 0.650   |
| C16orf71    | 101         | 5         | 4.95%         | 196          | 5         | 2.55%         | 0.50 [0.17-1.45]     | 0.286    | 0.650   |
| C16orf72    | 101         | 6         | 5.94%         | 196          | 4         | 2.04%         | 0.33 [0.11-0.97]     | 0.092    | 0.507   |
| MEIOB       | 101         | 7         | 6.93%         | 196          | 5         | 2.55%         | 0.35 [0.13-0.94]     | 0.081    | 0.507   |
| RMI2        | 101         | 5         | 4.95%         | 196          | 4         | 2.04%         | 0.40 [0.13-1.23]     | 0.179    | 0.535   |

| Symbol             | CINSARC Low |           |               | CINSARC High |           |               | CINSARC High vs. Low |          |         |
|--------------------|-------------|-----------|---------------|--------------|-----------|---------------|----------------------|----------|---------|
|                    | N tested    | N altered | Fq alteration | N tested     | N altered | Fq alteration | OR [95%CI]           | p-value* | q-value |
| <i>BRICD5</i>      | 101         | 6         | 5.94%         | 196          | 5         | 2.55%         | 0.41 [0.15-1.15]     | 0.154    | 0.535   |
| <i>C16orf82</i>    | 101         | 6         | 5.94%         | 196          | 3         | 1.53%         | 0.25 [0.076-0.80]    | 0.051    | 0.507   |
| <i>KNOP1</i>       | 101         | 5         | 4.95%         | 196          | 4         | 2.04%         | 0.40 [0.13-1.23]     | 0.179    | 0.535   |
| <i>C16orf89</i>    | 101         | 5         | 4.95%         | 196          | 5         | 2.55%         | 0.50 [0.17-1.45]     | 0.286    | 0.650   |
| <i>C16orf90</i>    | 101         | 5         | 4.95%         | 196          | 4         | 2.04%         | 0.40 [0.13-1.23]     | 0.179    | 0.535   |
| <i>C16orf91</i>    | 101         | 6         | 5.94%         | 196          | 5         | 2.55%         | 0.41 [0.15-1.15]     | 0.154    | 0.535   |
| <i>C16orf92</i>    | 101         | 5         | 4.95%         | 196          | 4         | 2.04%         | 0.40 [0.13-1.23]     | 0.179    | 0.535   |
| <i>OGFOD3</i>      | 101         | 2         | 1.98%         | 196          | 13        | 6.63%         | 3.52 [0.99-12.47]    | 0.102    | 0.507   |
| <i>TEN1</i>        | 101         | 4         | 3.96%         | 196          | 12        | 6.12%         | 1.58 [0.60-4.18]     | 0.438    | 0.798   |
| <i>LYRM9</i>       | 101         | 4         | 3.96%         | 196          | 6         | 3.06%         | 0.77 [0.26-2.26]     | 0.685    | 0.943   |
| <i>HID1</i>        | 101         | 5         | 4.95%         | 196          | 13        | 6.63%         | 1.36 [0.56-3.32]     | 0.566    | 0.852   |
| <i>MIEN1</i>       | 101         | 5         | 4.95%         | 196          | 10        | 5.10%         | 1.03 [0.41-2.60]     | 0.955    | 1.000   |
| <i>TEFM</i>        | 101         | 2         | 1.98%         | 196          | 3         | 1.53%         | 0.77 [0.17-3.50]     | 0.776    | 0.996   |
| <i>sept-04</i>     | 101         | 7         | 6.93%         | 196          | 28        | 14.29%        | 2.24 [1.08-4.63]     | 0.068    | 0.507   |
| <i>C17orf50</i>    | 101         | 2         | 1.98%         | 196          | 4         | 2.04%         | 1.03 [0.24-4.35]     | 0.972    | 1.000   |
| <i>LINC00469</i>   | 101         | 7         | 6.93%         | 196          | 14        | 7.14%         | 1.03 [0.47-2.28]     | 0.946    | 1.000   |
| <i>LINC00482</i>   | 101         | 2         | 1.98%         | 196          | 12        | 6.12%         | 3.23 [0.90-11.53]    | 0.130    | 0.535   |
| <i>EFCAB13</i>     | 101         | 1         | 0.99%         | 196          | 7         | 3.57%         | 3.70 [0.63-21.75]    | 0.224    | 0.596   |
| <i>C17orf58</i>    | 101         | 10        | 9.90%         | 196          | 28        | 14.29%        | 1.52 [0.80-2.88]     | 0.286    | 0.650   |
| <i>MILR1</i>       | 101         | 7         | 6.93%         | 196          | 27        | 13.78%        | 2.15 [1.03-4.45]     | 0.085    | 0.507   |
| <i>FAM222B</i>     | 101         | 3         | 2.97%         | 196          | 9         | 4.59%         | 1.57 [0.52-4.80]     | 0.505    | 0.805   |
| <i>C17orf64</i>    | 101         | 8         | 7.92%         | 196          | 34        | 17.35%        | 2.44 [1.23-4.82]     | 3.12E-02 | 0.507   |
| <i>C17orf67</i>    | 101         | 8         | 7.92%         | 196          | 21        | 10.71%        | 1.39 [0.68-2.85]     | 0.444    | 0.805   |
| <i>SMG8</i>        | 101         | 8         | 7.92%         | 196          | 29        | 14.80%        | 2.02 [1.01-4.03]     | 0.094    | 0.507   |
| <i>C17orf77</i>    | 101         | 6         | 5.94%         | 196          | 13        | 6.63%         | 1.12 [0.49-2.60]     | 0.817    | 1.000   |
| <i>C17orf78</i>    | 101         | 2         | 1.98%         | 196          | 4         | 2.04%         | 1.03 [0.24-4.35]     | 0.972    | 1.000   |
| <i>C17orf80</i>    | 101         | 5         | 4.95%         | 196          | 17        | 8.67%         | 1.82 [0.77-4.32]     | 0.252    | 0.623   |
| <i>C17orf82</i>    | 101         | 7         | 6.93%         | 196          | 32        | 16.33%        | 2.62 [1.28-5.38]     | 2.75E-02 | 0.507   |
| <i>OXLD1</i>       | 101         | 2         | 1.98%         | 196          | 12        | 6.12%         | 3.23 [0.90-11.53]    | 0.130    | 0.535   |
| <i>PRAC2</i>       | 101         | 2         | 1.98%         | 196          | 17        | 8.67%         | 4.70 [1.35-16.35]    | 4.11E-02 | 0.507   |
| <i>METTL23</i>     | 101         | 3         | 2.97%         | 196          | 13        | 6.63%         | 2.32 [0.79-6.79]     | 0.197    | 0.570   |
| <i>C17orf98</i>    | 101         | 4         | 3.96%         | 196          | 10        | 5.10%         | 1.30 [0.48-3.53]     | 0.661    | 0.935   |
| <i>C17orf99</i>    | 101         | 3         | 2.97%         | 196          | 17        | 8.67%         | 3.10 [1.09-8.87]     | 0.076    | 0.507   |
| <i>LINC00305</i>   | 101         | 2         | 1.98%         | 196          | 3         | 1.53%         | 0.77 [0.17-3.50]     | 0.776    | 0.996   |
| <i>DYNAP</i>       | 101         | 2         | 1.98%         | 196          | 3         | 1.53%         | 0.77 [0.17-3.50]     | 0.776    | 0.996   |
| <i>C18orf54</i>    | 101         | 2         | 1.98%         | 196          | 3         | 1.53%         | 0.77 [0.17-3.50]     | 0.776    | 0.996   |
| <i>C1QTNF1</i>     | 101         | 3         | 2.97%         | 196          | 13        | 6.63%         | 2.32 [0.79-6.79]     | 0.197    | 0.570   |
| <i>C1QTNF8</i>     | 101         | 6         | 5.94%         | 196          | 5         | 2.55%         | 0.41 [0.15-1.15]     | 0.154    | 0.535   |
| <i>C1orf100</i>    | 101         | 5         | 4.95%         | 196          | 19        | 9.69%         | 2.06 [0.88-4.83]     | 0.163    | 0.535   |
| <i>RUSC1-AS1</i>   | 101         | 7         | 6.93%         | 196          | 14        | 7.14%         | 1.03 [0.47-2.28]     | 0.946    | 1.000   |
| <i>C1orf105</i>    | 101         | 5         | 4.95%         | 196          | 14        | 7.14%         | 1.48 [0.61-3.57]     | 0.467    | 0.805   |
| <i>C1orf112</i>    | 101         | 4         | 3.96%         | 196          | 12        | 6.12%         | 1.58 [0.60-4.18]     | 0.438    | 0.798   |
| <i>CCDC181</i>     | 101         | 5         | 4.95%         | 196          | 13        | 6.63%         | 1.36 [0.56-3.32]     | 0.566    | 0.852   |
| <i>C1orf115</i>    | 101         | 6         | 5.94%         | 196          | 18        | 9.18%         | 1.60 [0.72-3.57]     | 0.335    | 0.716   |
| <i>C1orf116</i>    | 101         | 6         | 5.94%         | 196          | 24        | 12.24%        | 2.21 [1.01-4.82]     | 0.095    | 0.507   |
| <i>SPR TN</i>      | 101         | 6         | 5.94%         | 196          | 19        | 9.69%         | 1.70 [0.77-3.78]     | 0.274    | 0.643   |
| <i>AXDND1</i>      | 101         | 5         | 4.95%         | 196          | 19        | 9.69%         | 2.06 [0.88-4.83]     | 0.163    | 0.535   |
| <i>MROH9</i>       | 101         | 5         | 4.95%         | 196          | 13        | 6.63%         | 1.36 [0.56-3.32]     | 0.566    | 0.852   |
| <i>C1orf131</i>    | 101         | 6         | 5.94%         | 196          | 19        | 9.69%         | 1.70 [0.77-3.78]     | 0.274    | 0.643   |
| <i>SERTAD4-AS1</i> | 101         | 6         | 5.94%         | 196          | 21        | 10.71%        | 1.90 [0.86-4.19]     | 0.181    | 0.535   |
| <i>SHCBP1L</i>     | 101         | 5         | 4.95%         | 196          | 18        | 9.18%         | 1.94 [0.82-4.58]     | 0.203    | 0.570   |
| <i>GCSAML</i>      | 101         | 5         | 4.95%         | 196          | 19        | 9.69%         | 2.06 [0.88-4.83]     | 0.163    | 0.535   |
| <i>PFN1P2</i>      | 101         | 1         | 0.99%         | 196          | 7         | 3.57%         | 3.70 [0.63-21.75]    | 0.224    | 0.596   |
| <i>METTL18</i>     | 101         | 4         | 3.96%         | 196          | 13        | 6.63%         | 1.72 [0.66-4.51]     | 0.353    | 0.722   |
| <i>LINC00303</i>   | 101         | 7         | 6.93%         | 196          | 28        | 14.29%        | 2.24 [1.08-4.63]     | 0.068    | 0.507   |
| <i>TSACC</i>       | 101         | 5         | 4.95%         | 196          | 9         | 4.59%         | 0.92 [0.36-2.37]     | 0.890    | 1.000   |
| <i>C1orf189</i>    | 101         | 7         | 6.93%         | 196          | 12        | 6.12%         | 0.88 [0.39-1.97]     | 0.788    | 0.996   |
| <i>C1orf198</i>    | 101         | 6         | 5.94%         | 196          | 19        | 9.69%         | 1.70 [0.77-3.78]     | 0.274    | 0.643   |
| <i>C1orf21</i>     | 101         | 5         | 4.95%         | 196          | 19        | 9.69%         | 2.06 [0.88-4.83]     | 0.163    | 0.535   |
| <i>C1orf220</i>    | 101         | 5         | 4.95%         | 196          | 17        | 8.67%         | 1.82 [0.77-4.32]     | 0.252    | 0.623   |
| <i>C1orf226</i>    | 101         | 5         | 4.95%         | 196          | 18        | 9.18%         | 1.94 [0.82-4.58]     | 0.203    | 0.570   |
| <i>C1orf229</i>    | 101         | 5         | 4.95%         | 196          | 19        | 9.69%         | 2.06 [0.88-4.83]     | 0.163    | 0.535   |
| <i>RIIAD1</i>      | 101         | 6         | 5.94%         | 196          | 12        | 6.12%         | 1.03 [0.44-2.41]     | 0.950    | 1.000   |
| <i>TRMT1L</i>      | 101         | 5         | 4.95%         | 196          | 18        | 9.18%         | 1.94 [0.82-4.58]     | 0.203    | 0.570   |
| <i>SWT1</i>        | 101         | 5         | 4.95%         | 196          | 19        | 9.69%         | 2.06 [0.88-4.83]     | 0.163    | 0.535   |
| <i>COA6</i>        | 101         | 7         | 6.93%         | 196          | 20        | 10.20%        | 1.53 [0.72-3.24]     | 0.355    | 0.722   |
| <i>C1orf35</i>     | 101         | 6         | 5.94%         | 196          | 21        | 10.71%        | 1.90 [0.86-4.19]     | 0.181    | 0.535   |
| <i>C1orf43</i>     | 101         | 7         | 6.93%         | 196          | 12        | 6.12%         | 0.88 [0.39-1.97]     | 0.788    | 0.996   |
| <i>TEX35</i>       | 101         | 5         | 4.95%         | 196          | 17        | 8.67%         | 1.82 [0.77-4.32]     | 0.252    | 0.623   |
| <i>C1orf53</i>     | 101         | 5         | 4.95%         | 196          | 23        | 11.73%        | 2.55 [1.10-5.90]     | 0.066    | 0.507   |
| <i>C1orf54</i>     | 101         | 8         | 7.92%         | 196          | 15        | 7.65%         | 0.96 [0.46-2.04]     | 0.935    | 1.000   |



| Symbol      | CINSARC Low |           |               | CINSARC High |           |               | CINSARC High vs. Low |          |         |
|-------------|-------------|-----------|---------------|--------------|-----------|---------------|----------------------|----------|---------|
|             | N tested    | N altered | Fq alteration | N tested     | N altered | Fq alteration | OR [95%CI]           | p-value* | q-value |
| SDE2        | 101         | 6         | 5.94%         | 196          | 19        | 9.69%         | 1.70 [0.77-3.78]     | 0.274    | 0.643   |
| C1orf56     | 101         | 7         | 6.93%         | 196          | 14        | 7.14%         | 1.03 [0.47-2.28]     | 0.946    | 1.000   |
| NTPCR       | 101         | 6         | 5.94%         | 196          | 20        | 10.20%        | 1.80 [0.81-3.98]     | 0.224    | 0.596   |
| BROX        | 101         | 6         | 5.94%         | 196          | 19        | 9.69%         | 1.70 [0.77-3.78]     | 0.274    | 0.643   |
| C1orf61     | 101         | 5         | 4.95%         | 196          | 9         | 4.59%         | 0.92 [0.36-2.37]     | 0.890    | 1.000   |
| RRNAD1      | 101         | 7         | 6.93%         | 196          | 8         | 4.08%         | 0.57 [0.24-1.37]     | 0.294    | 0.650   |
| C1orf68     | 101         | 7         | 6.93%         | 196          | 13        | 6.63%         | 0.95 [0.43-2.12]     | 0.923    | 1.000   |
| IBA57       | 101         | 6         | 5.94%         | 196          | 21        | 10.71%        | 1.90 [0.86-4.19]     | 0.181    | 0.535   |
| C1orf74     | 101         | 6         | 5.94%         | 196          | 22        | 11.22%        | 2.00 [0.91-4.39]     | 0.146    | 0.535   |
| CHTOP       | 101         | 7         | 6.93%         | 196          | 12        | 6.12%         | 0.88 [0.39-1.97]     | 0.788    | 0.996   |
| LRRC71      | 101         | 6         | 5.94%         | 196          | 8         | 4.08%         | 0.67 [0.27-1.68]     | 0.476    | 0.805   |
| CCSAP       | 101         | 6         | 5.94%         | 196          | 19        | 9.69%         | 1.70 [0.77-3.78]     | 0.274    | 0.643   |
| LINC00467   | 101         | 7         | 6.93%         | 196          | 20        | 10.20%        | 1.53 [0.72-3.24]     | 0.355    | 0.722   |
| SUCO        | 101         | 5         | 4.95%         | 196          | 15        | 7.65%         | 1.59 [0.66-3.81]     | 0.382    | 0.750   |
| FAM209A     | 101         | 7         | 6.93%         | 196          | 14        | 7.14%         | 1.03 [0.47-2.28]     | 0.946    | 1.000   |
| FAM209B     | 101         | 7         | 6.93%         | 196          | 14        | 7.14%         | 1.03 [0.47-2.28]     | 0.946    | 1.000   |
| FAM210B     | 101         | 7         | 6.93%         | 196          | 11        | 5.61%         | 0.80 [0.35-1.82]     | 0.652    | 0.928   |
| OSER1       | 101         | 3         | 2.97%         | 196          | 3         | 1.53%         | 0.51 [0.13-1.98]     | 0.412    | 0.774   |
| SOGA1       | 101         | 4         | 3.96%         | 196          | 6         | 3.06%         | 0.77 [0.26-2.26]     | 0.685    | 0.943   |
| TLDC2       | 101         | 3         | 2.97%         | 196          | 6         | 3.06%         | 1.03 [0.32-3.36]     | 0.965    | 1.000   |
| GID8        | 101         | 7         | 6.93%         | 196          | 14        | 7.14%         | 1.03 [0.47-2.28]     | 0.946    | 1.000   |
| OCSTAMP     | 101         | 4         | 3.96%         | 196          | 7         | 3.57%         | 0.90 [0.31-2.57]     | 0.867    | 1.000   |
| MROH8       | 101         | 4         | 3.96%         | 196          | 3         | 1.53%         | 0.38 [0.11-1.35]     | 0.207    | 0.573   |
| ABHD16B     | 101         | 6         | 5.94%         | 196          | 12        | 6.12%         | 1.03 [0.44-2.41]     | 0.950    | 1.000   |
| RBBP8NL     | 101         | 6         | 5.94%         | 196          | 11        | 5.61%         | 0.94 [0.40-2.23]     | 0.908    | 1.000   |
| CNBD2       | 101         | 4         | 3.96%         | 196          | 8         | 4.08%         | 1.03 [0.37-2.88]     | 0.960    | 1.000   |
| SPATA25     | 101         | 5         | 4.95%         | 196          | 4         | 2.04%         | 0.40 [0.13-1.23]     | 0.179    | 0.535   |
| C20orf173   | 101         | 4         | 3.96%         | 196          | 8         | 4.08%         | 1.03 [0.37-2.88]     | 0.960    | 1.000   |
| FAM217B     | 101         | 10        | 9.90%         | 196          | 13        | 6.63%         | 0.65 [0.31-1.33]     | 0.321    | 0.700   |
| C20orf197   | 101         | 11        | 10.89%        | 196          | 14        | 7.14%         | 0.63 [0.31-1.26]     | 0.274    | 0.643   |
| ZFAS1       | 101         | 7         | 6.93%         | 196          | 7         | 3.57%         | 0.50 [0.20-1.23]     | 0.203    | 0.570   |
| MRGBP       | 101         | 7         | 6.93%         | 196          | 14        | 7.14%         | 1.03 [0.47-2.28]     | 0.946    | 1.000   |
| AAR2        | 101         | 4         | 3.96%         | 196          | 7         | 3.57%         | 0.90 [0.31-2.57]     | 0.867    | 1.000   |
| C20orf85    | 101         | 8         | 7.92%         | 196          | 17        | 8.67%         | 1.10 [0.53-2.30]     | 0.825    | 1.000   |
| C2CD3       | 101         | 7         | 6.93%         | 196          | 12        | 6.12%         | 0.88 [0.39-1.97]     | 0.788    | 0.996   |
| C2CD4D      | 101         | 6         | 5.94%         | 196          | 12        | 6.12%         | 1.03 [0.44-2.41]     | 0.950    | 1.000   |
| ERGIC3      | 101         | 4         | 3.96%         | 196          | 8         | 4.08%         | 1.03 [0.37-2.88]     | 0.960    | 1.000   |
| XXYL1       | 101         | 3         | 2.97%         | 196          | 3         | 1.53%         | 0.51 [0.13-1.98]     | 0.412    | 0.774   |
| CEP19       | 101         | 3         | 2.97%         | 196          | 5         | 2.55%         | 0.86 [0.25-2.89]     | 0.833    | 1.000   |
| MB21D2      | 101         | 3         | 2.97%         | 196          | 3         | 1.53%         | 0.51 [0.13-1.98]     | 0.412    | 0.774   |
| C3orf70     | 101         | 3         | 2.97%         | 196          | 2         | 1.02%         | 0.34 [0.074-1.53]    | 0.237    | 0.599   |
| C4BPA       | 101         | 6         | 5.94%         | 196          | 24        | 12.24%        | 2.21 [1.01-4.82]     | 0.095    | 0.507   |
| C4BPB       | 101         | 6         | 5.94%         | 196          | 24        | 12.24%        | 2.21 [1.01-4.82]     | 0.095    | 0.507   |
| GFOD1       | 101         | 1         | 0.99%         | 196          | 4         | 2.04%         | 2.08 [0.33-13.25]    | 0.514    | 0.805   |
| C6orf203    | 101         | 1         | 0.99%         | 196          | 9         | 4.59%         | 4.81 [0.84-27.58]    | 0.139    | 0.535   |
| CCDC170     | 101         | 1         | 0.99%         | 196          | 4         | 2.04%         | 2.08 [0.33-13.25]    | 0.514    | 0.805   |
| PPP1R17     | 101         | 0         | 0.00%         | 196          | 8         | 4.08%         | 3.6e+07 [0e+00-Inf]  | 0.992    | 1.000   |
| MALSU1      | 101         | 0         | 0.00%         | 196          | 6         | 3.06%         | 2.7e+07 [0e+00-Inf]  | 0.992    | 1.000   |
| C7orf31     | 101         | 0         | 0.00%         | 196          | 7         | 3.57%         | 3.2e+07 [0e+00-Inf]  | 0.992    | 1.000   |
| MTURN       | 101         | 0         | 0.00%         | 196          | 6         | 3.06%         | 2.7e+07 [0e+00-Inf]  | 0.992    | 1.000   |
| FAM221A     | 101         | 0         | 0.00%         | 196          | 6         | 3.06%         | 2.7e+07 [0e+00-Inf]  | 0.992    | 1.000   |
| C7orf71     | 101         | 0         | 0.00%         | 196          | 5         | 2.55%         | 2.2e+07 [0e+00-Inf]  | 0.992    | 1.000   |
| TMEM249     | 101         | 18        | 17.82%        | 196          | 49        | 25.00%        | 1.54 [0.93-2.55]     | 0.163    | 0.535   |
| C8orf31     | 101         | 16        | 15.84%        | 196          | 49        | 25.00%        | 1.77 [1.05-2.99]     | 0.073    | 0.507   |
| C8orf33     | 101         | 16        | 15.84%        | 196          | 48        | 24.49%        | 1.72 [1.02-2.91]     | 0.088    | 0.507   |
| C8orf34     | 101         | 14        | 13.86%        | 196          | 37        | 18.88%        | 1.45 [0.83-2.53]     | 0.279    | 0.650   |
| C8orf37     | 101         | 16        | 15.84%        | 196          | 54        | 27.55%        | 2.02 [1.20-3.40]     | 2.60E-02 | 0.507   |
| NDUFAF6     | 101         | 16        | 15.84%        | 196          | 54        | 27.55%        | 2.02 [1.20-3.40]     | 2.60E-02 | 0.507   |
| RBM12B-AS1  | 101         | 17        | 16.83%        | 196          | 54        | 27.55%        | 1.88 [1.13-3.13]     | 4.21E-02 | 0.507   |
| SMIM19      | 101         | 16        | 15.84%        | 196          | 30        | 15.31%        | 0.96 [0.55-1.67]     | 0.904    | 1.000   |
| TTI2        | 101         | 4         | 3.96%         | 196          | 10        | 5.10%         | 1.30 [0.48-3.53]     | 0.661    | 0.935   |
| C8orf44     | 101         | 15        | 14.85%        | 196          | 38        | 19.39%        | 1.38 [0.80-2.38]     | 0.335    | 0.716   |
| MCMDC2      | 101         | 15        | 14.85%        | 196          | 39        | 19.90%        | 1.42 [0.82-2.46]     | 0.287    | 0.650   |
| RHPN1-AS1   | 101         | 17        | 16.83%        | 196          | 51        | 26.02%        | 1.74 [1.04-2.90]     | 0.076    | 0.507   |
| THEM6       | 101         | 16        | 15.84%        | 196          | 49        | 25.00%        | 1.77 [1.05-2.99]     | 0.073    | 0.507   |
| LINC00588   | 101         | 14        | 13.86%        | 196          | 29        | 14.80%        | 1.08 [0.61-1.92]     | 0.828    | 1.000   |
| MROH6       | 101         | 17        | 16.83%        | 196          | 51        | 26.02%        | 1.74 [1.04-2.90]     | 0.076    | 0.507   |
| C8orf76     | 101         | 14        | 13.86%        | 196          | 57        | 29.08%        | 2.55 [1.49-4.37]     | 4.36E-03 | 0.507   |
| ZNF252P-AS1 | 101         | 16        | 15.84%        | 196          | 47        | 23.98%        | 1.68 [0.99-2.84]     | 0.106    | 0.507   |
| TRIQK       | 101         | 16        | 15.84%        | 196          | 54        | 27.55%        | 2.02 [1.20-3.40]     | 2.60E-02 | 0.507   |
| SBSPON      | 101         | 16        | 15.84%        | 196          | 42        | 21.43%        | 1.45 [0.85-2.47]     | 0.252    | 0.623   |

| Symbol   | CINSARC Low |           |               | CINSARC High |           |               | CINSARC High vs. Low |          |         |
|----------|-------------|-----------|---------------|--------------|-----------|---------------|----------------------|----------|---------|
|          | N tested    | N altered | Fq alteration | N tested     | N altered | Fq alteration | OR [95%CI]           | p-value* | q-value |
| AARD     | 101         | 16        | 15.84%        | 196          | 57        | 29.08%        | 2.18 [1.30-3.66]     | 1.33E-02 | 0.507   |
| C8orf86  | 101         | 11        | 10.89%        | 196          | 43        | 21.94%        | 2.30 [1.27-4.18]     | 2.18E-02 | 0.507   |
| C9orf131 | 101         | 1         | 0.99%         | 196          | 4         | 2.04%         | 2.08 [0.33-13.25]    | 0.514    | 0.805   |
| FAM205A  | 101         | 1         | 0.99%         | 196          | 4         | 2.04%         | 2.08 [0.33-13.25]    | 0.514    | 0.805   |
| RPP25L   | 101         | 1         | 0.99%         | 196          | 4         | 2.04%         | 2.08 [0.33-13.25]    | 0.514    | 0.805   |
| CA10     | 101         | 4         | 3.96%         | 196          | 12        | 6.12%         | 1.58 [0.60-4.18]     | 0.438    | 0.798   |
| CA13     | 101         | 17        | 16.83%        | 196          | 47        | 23.98%        | 1.56 [0.93-2.61]     | 0.158    | 0.535   |
| CA14     | 101         | 8         | 7.92%         | 196          | 15        | 7.65%         | 0.96 [0.46-2.04]     | 0.935    | 1.000   |
| CA1      | 101         | 17        | 16.83%        | 196          | 47        | 23.98%        | 1.56 [0.93-2.61]     | 0.158    | 0.535   |
| CA2      | 101         | 17        | 16.83%        | 196          | 48        | 24.49%        | 1.60 [0.96-2.68]     | 0.133    | 0.535   |
| CA3      | 101         | 17        | 16.83%        | 196          | 48        | 24.49%        | 1.60 [0.96-2.68]     | 0.133    | 0.535   |
| CA4      | 101         | 7         | 6.93%         | 196          | 33        | 16.84%        | 2.72 [1.33-5.57]     | 2.17E-02 | 0.507   |
| CA8      | 101         | 16        | 15.84%        | 196          | 33        | 16.84%        | 1.08 [0.62-1.86]     | 0.827    | 1.000   |
| CABLES2  | 101         | 6         | 5.94%         | 196          | 11        | 5.61%         | 0.94 [0.40-2.23]     | 0.908    | 1.000   |
| CABP2    | 101         | 11        | 10.89%        | 196          | 20        | 10.20%        | 0.93 [0.48-1.79]     | 0.854    | 1.000   |
| CABP4    | 101         | 11        | 10.89%        | 196          | 20        | 10.20%        | 0.93 [0.48-1.79]     | 0.854    | 1.000   |
| CACNA1E  | 101         | 5         | 4.95%         | 196          | 18        | 9.18%         | 1.94 [0.82-4.58]     | 0.203    | 0.570   |
| CACNA1G  | 101         | 4         | 3.96%         | 196          | 19        | 9.69%         | 2.60 [1.03-6.59]     | 0.090    | 0.507   |
| CACNA1H  | 101         | 6         | 5.94%         | 196          | 5         | 2.55%         | 0.41 [0.15-1.15]     | 0.154    | 0.535   |
| CACNA1S  | 101         | 6         | 5.94%         | 196          | 24        | 12.24%        | 2.21 [1.01-4.82]     | 0.095    | 0.507   |
| CACNB1   | 101         | 4         | 3.96%         | 196          | 12        | 6.12%         | 1.58 [0.60-4.18]     | 0.438    | 0.798   |
| CACNG1   | 101         | 10        | 9.90%         | 196          | 29        | 14.80%        | 1.58 [0.83-3.00]     | 0.240    | 0.606   |
| CACNG3   | 101         | 5         | 4.95%         | 196          | 3         | 1.53%         | 0.30 [0.088-1.01]    | 0.103    | 0.507   |
| CACNG4   | 101         | 9         | 8.91%         | 196          | 29        | 14.80%        | 1.78 [0.91-3.44]     | 0.155    | 0.535   |
| CACNG5   | 101         | 9         | 8.91%         | 196          | 30        | 15.31%        | 1.85 [0.95-3.58]     | 0.126    | 0.535   |
| CACYBP   | 101         | 5         | 4.95%         | 196          | 16        | 8.16%         | 1.71 [0.72-4.07]     | 0.311    | 0.680   |
| CADM3    | 101         | 6         | 5.94%         | 196          | 8         | 4.08%         | 0.67 [0.27-1.68]     | 0.476    | 0.805   |
| CALB1    | 101         | 18        | 17.82%        | 196          | 48        | 24.49%        | 1.50 [0.90-2.48]     | 0.192    | 0.563   |
| CALCA    | 101         | 1         | 0.99%         | 196          | 4         | 2.04%         | 2.08 [0.33-13.25]    | 0.514    | 0.805   |
| CALCB    | 101         | 1         | 0.99%         | 196          | 4         | 2.04%         | 2.08 [0.33-13.25]    | 0.514    | 0.805   |
| CALCOCO2 | 101         | 2         | 1.98%         | 196          | 18        | 9.18%         | 5.01 [1.44-17.35]    | 3.31E-02 | 0.507   |
| CAMK1G   | 101         | 6         | 5.94%         | 196          | 23        | 11.73%        | 2.11 [0.96-4.60]     | 0.118    | 0.526   |
| CAMK2B   | 101         | 0         | 0.00%         | 196          | 5         | 2.55%         | 2.2e+07 [0e+00-Inf]  | 0.992    | 1.000   |
| CAMK2G   | 101         | 0         | 0.00%         | 196          | 5         | 2.55%         | 2.2e+07 [0e+00-Inf]  | 0.992    | 1.000   |
| CAMK2N2  | 101         | 3         | 2.97%         | 196          | 2         | 1.02%         | 0.34 [0.074-1.53]    | 0.237    | 0.599   |
| CAMSAP2  | 101         | 6         | 5.94%         | 196          | 24        | 12.24%        | 2.21 [1.01-4.82]     | 0.095    | 0.507   |
| CAND1    | 101         | 4         | 3.96%         | 196          | 14        | 7.14%         | 1.87 [0.72-4.85]     | 0.283    | 0.650   |
| CANT1    | 101         | 3         | 2.97%         | 196          | 13        | 6.63%         | 2.32 [0.79-6.79]     | 0.197    | 0.570   |
| CAPN2    | 101         | 6         | 5.94%         | 196          | 18        | 9.18%         | 1.60 [0.72-3.57]     | 0.335    | 0.716   |
| CAPN5    | 101         | 7         | 6.93%         | 196          | 19        | 9.69%         | 1.44 [0.68-3.07]     | 0.427    | 0.791   |
| CAPN8    | 101         | 6         | 5.94%         | 196          | 18        | 9.18%         | 1.60 [0.72-3.57]     | 0.335    | 0.716   |
| CAPN9    | 101         | 6         | 5.94%         | 196          | 19        | 9.69%         | 1.70 [0.77-3.78]     | 0.274    | 0.643   |
| CAPS2    | 101         | 2         | 1.98%         | 196          | 7         | 3.57%         | 1.83 [0.48-6.96]     | 0.455    | 0.805   |
| CARD14   | 101         | 4         | 3.96%         | 196          | 14        | 7.14%         | 1.87 [0.72-4.85]     | 0.283    | 0.650   |
| CARHSP1  | 101         | 6         | 5.94%         | 196          | 4         | 2.04%         | 0.33 [0.11-0.97]     | 0.092    | 0.507   |
| CARNS1   | 101         | 11        | 10.89%        | 196          | 20        | 10.20%        | 0.93 [0.48-1.79]     | 0.854    | 1.000   |
| CASC3    | 101         | 5         | 4.95%         | 196          | 9         | 4.59%         | 0.92 [0.36-2.37]     | 0.890    | 1.000   |
| CASKIN1  | 101         | 6         | 5.94%         | 196          | 5         | 2.55%         | 0.41 [0.15-1.15]     | 0.154    | 0.535   |
| CASKIN2  | 101         | 5         | 4.95%         | 196          | 12        | 6.12%         | 1.25 [0.51-3.08]     | 0.681    | 0.943   |
| CASQ1    | 101         | 6         | 5.94%         | 196          | 12        | 6.12%         | 1.03 [0.44-2.41]     | 0.950    | 1.000   |
| CASS4    | 101         | 8         | 7.92%         | 196          | 14        | 7.14%         | 0.89 [0.42-1.91]     | 0.808    | 1.000   |
| CATSPER1 | 101         | 0         | 0.00%         | 196          | 5         | 2.55%         | 2.2e+07 [0e+00-Inf]  | 0.992    | 1.000   |
| CBLN4    | 101         | 6         | 5.94%         | 196          | 10        | 5.10%         | 0.85 [0.36-2.04]     | 0.762    | 0.996   |
| CBX1     | 101         | 1         | 0.99%         | 196          | 13        | 6.63%         | 7.10 [1.27-39.64]    | 0.061    | 0.507   |
| CBX2     | 101         | 4         | 3.96%         | 196          | 18        | 9.18%         | 2.45 [0.97-6.23]     | 0.114    | 0.512   |
| CBX3     | 101         | 0         | 0.00%         | 196          | 5         | 2.55%         | 2.2e+07 [0e+00-Inf]  | 0.992    | 1.000   |
| CBX4     | 101         | 3         | 2.97%         | 196          | 18        | 9.18%         | 3.30 [1.16-9.41]     | 0.060    | 0.507   |
| CBX8     | 101         | 4         | 3.96%         | 196          | 20        | 10.20%        | 2.76 [1.09-6.95]     | 0.071    | 0.507   |
| CCBE1    | 101         | 1         | 0.99%         | 196          | 4         | 2.04%         | 2.08 [0.33-13.25]    | 0.514    | 0.805   |
| CCDC106  | 101         | 2         | 1.98%         | 196          | 4         | 2.04%         | 1.03 [0.24-4.35]     | 0.972    | 1.000   |
| MCU      | 101         | 1         | 0.99%         | 196          | 4         | 2.04%         | 2.08 [0.33-13.25]    | 0.514    | 0.805   |
| CCDC126  | 101         | 0         | 0.00%         | 196          | 6         | 3.06%         | 2.7e+07 [0e+00-Inf]  | 0.992    | 1.000   |
| CCDC137  | 101         | 2         | 1.98%         | 196          | 12        | 6.12%         | 3.23 [0.90-11.53]    | 0.130    | 0.535   |
| CCDC144B | 101         | 3         | 2.97%         | 196          | 2         | 1.02%         | 0.34 [0.074-1.53]    | 0.237    | 0.599   |
| CCDC154  | 101         | 6         | 5.94%         | 196          | 5         | 2.55%         | 0.41 [0.15-1.15]     | 0.154    | 0.535   |
| CCDC158  | 101         | 2         | 1.98%         | 196          | 5         | 2.55%         | 1.30 [0.32-5.21]     | 0.759    | 0.996   |
| CCDC39   | 101         | 4         | 3.96%         | 196          | 2         | 1.02%         | 0.25 [0.059-1.05]    | 0.113    | 0.511   |
| CCDC40   | 101         | 3         | 2.97%         | 196          | 16        | 8.16%         | 2.90 [1.01-8.34]     | 0.097    | 0.507   |
| CEP95    | 101         | 8         | 7.92%         | 196          | 27        | 13.78%        | 1.86 [0.93-3.72]     | 0.143    | 0.535   |
| CEP112   | 101         | 9         | 8.91%         | 196          | 25        | 12.76%        | 1.49 [0.76-2.93]     | 0.327    | 0.712   |
| CCDC47   | 101         | 8         | 7.92%         | 196          | 29        | 14.80%        | 2.02 [1.01-4.03]     | 0.094    | 0.507   |

| Symbol   | CINSARC Low |           |               | CINSARC High |           |               | CINSARC High vs. Low |          |         |
|----------|-------------|-----------|---------------|--------------|-----------|---------------|----------------------|----------|---------|
|          | N tested    | N altered | Fq alteration | N tested     | N altered | Fq alteration | OR [95%CI]           | p-value* | q-value |
| CCDC50   | 101         | 3         | 2.97%         | 196          | 3         | 1.53%         | 0.51 [0.13-1.98]     | 0.412    | 0.774   |
| NSRP1    | 101         | 2         | 1.98%         | 196          | 4         | 2.04%         | 1.03 [0.24-4.35]     | 0.972    | 1.000   |
| CCDC57   | 101         | 2         | 1.98%         | 196          | 13        | 6.63%         | 3.52 [0.99-12.47]    | 0.102    | 0.507   |
| CCDC68   | 101         | 2         | 1.98%         | 196          | 3         | 1.53%         | 0.77 [0.17-3.50]     | 0.776    | 0.996   |
| CCDC78   | 101         | 6         | 5.94%         | 196          | 4         | 2.04%         | 0.33 [0.11-0.97]     | 0.092    | 0.507   |
| CCDC81   | 101         | 1         | 0.99%         | 196          | 4         | 2.04%         | 2.08 [0.33-13.25]    | 0.514    | 0.805   |
| CCDC83   | 101         | 2         | 1.98%         | 196          | 3         | 1.53%         | 0.77 [0.17-3.50]     | 0.776    | 0.996   |
| CCDC87   | 101         | 5         | 4.95%         | 196          | 14        | 7.14%         | 1.48 [0.61-3.57]     | 0.467    | 0.805   |
| CCDC89   | 101         | 2         | 1.98%         | 196          | 3         | 1.53%         | 0.77 [0.17-3.50]     | 0.776    | 0.996   |
| CCL14    | 101         | 2         | 1.98%         | 196          | 4         | 2.04%         | 1.03 [0.24-4.35]     | 0.972    | 1.000   |
| CCL15    | 101         | 2         | 1.98%         | 196          | 4         | 2.04%         | 1.03 [0.24-4.35]     | 0.972    | 1.000   |
| CCL16    | 101         | 2         | 1.98%         | 196          | 4         | 2.04%         | 1.03 [0.24-4.35]     | 0.972    | 1.000   |
| CCL19    | 101         | 1         | 0.99%         | 196          | 4         | 2.04%         | 2.08 [0.33-13.25]    | 0.514    | 0.805   |
| CCL21    | 101         | 1         | 0.99%         | 196          | 4         | 2.04%         | 2.08 [0.33-13.25]    | 0.514    | 0.805   |
| CCL23    | 101         | 2         | 1.98%         | 196          | 5         | 2.55%         | 1.30 [0.32-5.21]     | 0.759    | 0.996   |
| CCL27    | 101         | 1         | 0.99%         | 196          | 4         | 2.04%         | 2.08 [0.33-13.25]    | 0.514    | 0.805   |
| CCL3L1   | 101         | 3         | 2.97%         | 196          | 10        | 5.10%         | 1.76 [0.58-5.29]     | 0.401    | 0.774   |
| CCL3L3   | 101         | 3         | 2.97%         | 196          | 10        | 5.10%         | 1.76 [0.58-5.29]     | 0.401    | 0.774   |
| CCL3     | 101         | 2         | 1.98%         | 196          | 5         | 2.55%         | 1.30 [0.32-5.21]     | 0.759    | 0.996   |
| CCL4L2   | 101         | 3         | 2.97%         | 196          | 11        | 5.61%         | 1.94 [0.65-5.78]     | 0.317    | 0.692   |
| CCL4     | 101         | 2         | 1.98%         | 196          | 7         | 3.57%         | 1.83 [0.48-6.96]     | 0.455    | 0.805   |
| CCL5     | 101         | 2         | 1.98%         | 196          | 5         | 2.55%         | 1.30 [0.32-5.21]     | 0.759    | 0.996   |
| CCND1    | 101         | 25        | 24.75%        | 196          | 63        | 32.14%        | 1.44 [0.91-2.27]     | 0.188    | 0.553   |
| CCNE2    | 101         | 16        | 15.84%        | 196          | 54        | 27.55%        | 2.02 [1.20-3.40]     | 2.60E-02 | 0.507   |
| CCNF     | 101         | 6         | 5.94%         | 196          | 5         | 2.55%         | 0.41 [0.15-1.15]     | 0.154    | 0.535   |
| CCR7     | 101         | 4         | 3.96%         | 196          | 5         | 2.55%         | 0.63 [0.21-1.95]     | 0.505    | 0.805   |
| CCS      | 101         | 6         | 5.94%         | 196          | 14        | 7.14%         | 1.22 [0.53-2.79]     | 0.696    | 0.951   |
| CCT2     | 101         | 2         | 1.98%         | 196          | 17        | 8.67%         | 4.70 [1.35-16.35]    | 4.11E-02 | 0.507   |
| CCT3     | 101         | 5         | 4.95%         | 196          | 9         | 4.59%         | 0.92 [0.36-2.37]     | 0.890    | 1.000   |
| CCT6B    | 101         | 1         | 0.99%         | 196          | 5         | 2.55%         | 2.62 [0.43-16.05]    | 0.383    | 0.750   |
| CD160    | 101         | 5         | 4.95%         | 196          | 10        | 5.10%         | 1.03 [0.41-2.60]     | 0.955    | 1.000   |
| CD19     | 101         | 6         | 5.94%         | 196          | 3         | 1.53%         | 0.25 [0.076-0.80]    | 0.051    | 0.507   |
| CD1A     | 101         | 7         | 6.93%         | 196          | 10        | 5.10%         | 0.72 [0.31-1.67]     | 0.522    | 0.815   |
| CD1B     | 101         | 7         | 6.93%         | 196          | 10        | 5.10%         | 0.72 [0.31-1.67]     | 0.522    | 0.815   |
| CD1C     | 101         | 7         | 6.93%         | 196          | 9         | 4.59%         | 0.65 [0.27-1.52]     | 0.401    | 0.774   |
| CD1D     | 101         | 7         | 6.93%         | 196          | 9         | 4.59%         | 0.65 [0.27-1.52]     | 0.401    | 0.774   |
| CD1E     | 101         | 7         | 6.93%         | 196          | 10        | 5.10%         | 0.72 [0.31-1.67]     | 0.522    | 0.815   |
| CD244    | 101         | 6         | 5.94%         | 196          | 16        | 8.16%         | 1.41 [0.62-3.18]     | 0.490    | 0.805   |
| CD247    | 101         | 5         | 4.95%         | 196          | 12        | 6.12%         | 1.25 [0.51-3.08]     | 0.681    | 0.943   |
| CD248    | 101         | 3         | 2.97%         | 196          | 6         | 3.06%         | 1.03 [0.32-3.36]     | 0.965    | 1.000   |
| CD24     | 101         | 0         | 0.00%         | 196          | 0         | 0.00%         | 1.00 [0e+00-Inf]     | 1.000    | 1.000   |
| CD2BP2   | 101         | 4         | 3.96%         | 196          | 5         | 2.55%         | 0.63 [0.21-1.95]     | 0.505    | 0.805   |
| CD300A   | 101         | 7         | 6.93%         | 196          | 13        | 6.63%         | 0.95 [0.43-2.12]     | 0.923    | 1.000   |
| CD300C   | 101         | 6         | 5.94%         | 196          | 13        | 6.63%         | 1.12 [0.49-2.60]     | 0.817    | 1.000   |
| CD300E   | 101         | 6         | 5.94%         | 196          | 14        | 7.14%         | 1.22 [0.53-2.79]     | 0.696    | 0.951   |
| CD300LB  | 101         | 6         | 5.94%         | 196          | 13        | 6.63%         | 1.12 [0.49-2.60]     | 0.817    | 1.000   |
| CD300LD  | 101         | 6         | 5.94%         | 196          | 13        | 6.63%         | 1.12 [0.49-2.60]     | 0.817    | 1.000   |
| CD300LF  | 101         | 5         | 4.95%         | 196          | 13        | 6.63%         | 1.36 [0.56-3.32]     | 0.566    | 0.852   |
| CD34     | 101         | 7         | 6.93%         | 196          | 25        | 12.76%        | 1.96 [0.94-4.09]     | 0.131    | 0.535   |
| CD40     | 101         | 5         | 4.95%         | 196          | 5         | 2.55%         | 0.50 [0.17-1.45]     | 0.286    | 0.650   |
| CD44     | 101         | 1         | 0.99%         | 196          | 5         | 2.55%         | 2.62 [0.43-16.05]    | 0.383    | 0.750   |
| CD46     | 101         | 7         | 6.93%         | 196          | 25        | 12.76%        | 1.96 [0.94-4.09]     | 0.131    | 0.535   |
| CD48     | 101         | 6         | 5.94%         | 196          | 15        | 7.65%         | 1.31 [0.58-2.98]     | 0.586    | 0.869   |
| CD55     | 101         | 6         | 5.94%         | 196          | 24        | 12.24%        | 2.21 [1.01-4.82]     | 0.095    | 0.507   |
| CD59     | 101         | 1         | 0.99%         | 196          | 4         | 2.04%         | 2.08 [0.33-13.25]    | 0.514    | 0.805   |
| CD5L     | 101         | 7         | 6.93%         | 196          | 9         | 4.59%         | 0.65 [0.27-1.52]     | 0.401    | 0.774   |
| CD5      | 101         | 2         | 1.98%         | 196          | 3         | 1.53%         | 0.77 [0.17-3.50]     | 0.776    | 0.996   |
| CD79B    | 101         | 8         | 7.92%         | 196          | 29        | 14.80%        | 2.02 [1.01-4.03]     | 0.094    | 0.507   |
| CD7      | 101         | 2         | 1.98%         | 196          | 14        | 7.14%         | 3.81 [1.08-13.43]    | 0.081    | 0.507   |
| CD84     | 101         | 5         | 4.95%         | 196          | 14        | 7.14%         | 1.48 [0.61-3.57]     | 0.467    | 0.805   |
| CDC27    | 101         | 1         | 0.99%         | 196          | 5         | 2.55%         | 2.62 [0.43-16.05]    | 0.383    | 0.750   |
| CDC42BPA | 101         | 6         | 5.94%         | 196          | 20        | 10.20%        | 1.80 [0.81-3.98]     | 0.224    | 0.596   |
| CDC42EP4 | 101         | 5         | 4.95%         | 196          | 17        | 8.67%         | 1.82 [0.77-4.32]     | 0.252    | 0.623   |
| CDC42SE1 | 101         | 7         | 6.93%         | 196          | 14        | 7.14%         | 1.03 [0.47-2.28]     | 0.946    | 1.000   |
| CDC6     | 101         | 4         | 3.96%         | 196          | 7         | 3.57%         | 0.90 [0.31-2.57]     | 0.867    | 1.000   |
| CDC73    | 101         | 5         | 4.95%         | 196          | 18        | 9.18%         | 1.94 [0.82-4.58]     | 0.203    | 0.570   |
| CDCA7L   | 101         | 0         | 0.00%         | 196          | 6         | 3.06%         | 2.7e+07 [0e+00-Inf]  | 0.992    | 1.000   |
| CDH17    | 101         | 17        | 16.83%        | 196          | 52        | 26.53%        | 1.78 [1.07-2.98]     | 0.063    | 0.507   |
| CDH20    | 101         | 2         | 1.98%         | 196          | 3         | 1.53%         | 0.77 [0.17-3.50]     | 0.776    | 0.996   |
| CDH22    | 101         | 4         | 3.96%         | 196          | 5         | 2.55%         | 0.63 [0.21-1.95]     | 0.505    | 0.805   |
| CDH24    | 101         | 1         | 0.99%         | 196          | 4         | 2.04%         | 2.08 [0.33-13.25]    | 0.514    | 0.805   |

| Symbol   | CINSARC Low |           |               | CINSARC High |           |               | CINSARC High vs. Low |          |         |
|----------|-------------|-----------|---------------|--------------|-----------|---------------|----------------------|----------|---------|
|          | N tested    | N altered | Fq alteration | N tested     | N altered | Fq alteration | OR [95%CI]           | p-value* | q-value |
| CDH26    | 101         | 10        | 9.90%         | 196          | 13        | 6.63%         | 0.65 [0.31-1.33]     | 0.321    | 0.700   |
| CDH4     | 101         | 7         | 6.93%         | 196          | 12        | 6.12%         | 0.88 [0.39-1.97]     | 0.788    | 0.996   |
| CDIPT    | 101         | 5         | 4.95%         | 196          | 4         | 2.04%         | 0.40 [0.13-1.23]     | 0.179    | 0.535   |
| CDK12    | 101         | 6         | 5.94%         | 196          | 13        | 6.63%         | 1.12 [0.49-2.60]     | 0.817    | 1.000   |
| CDK18    | 101         | 7         | 6.93%         | 196          | 26        | 13.27%        | 2.05 [0.99-4.27]     | 0.106    | 0.507   |
| CDK2AP2  | 101         | 11        | 10.89%        | 196          | 20        | 10.20%        | 0.93 [0.48-1.79]     | 0.854    | 1.000   |
| CDK3     | 101         | 4         | 3.96%         | 196          | 12        | 6.12%         | 1.58 [0.60-4.18]     | 0.438    | 0.798   |
| CDK4     | 101         | 0         | 0.00%         | 196          | 5         | 2.55%         | 2.2e+07 [0e+00-Inf]  | 0.992    | 1.000   |
| CDK5R1   | 101         | 2         | 1.98%         | 196          | 5         | 2.55%         | 1.30 [0.32-5.21]     | 0.759    | 0.996   |
| CDK5RAP3 | 101         | 1         | 0.99%         | 196          | 9         | 4.59%         | 4.81 [0.84-27.58]    | 0.139    | 0.535   |
| CDKL2    | 101         | 1         | 0.99%         | 196          | 5         | 2.55%         | 2.62 [0.43-16.05]    | 0.383    | 0.750   |
| CDR2L    | 101         | 5         | 4.95%         | 196          | 13        | 6.63%         | 1.36 [0.56-3.32]     | 0.566    | 0.852   |
| CDR2     | 101         | 5         | 4.95%         | 196          | 3         | 1.53%         | 0.30 [0.088-1.01]    | 0.103    | 0.507   |
| CDY1B    | 101         | 0         | 0.00%         | 196          | 0         | 0.00%         | 1.00 [0e+00-Inf]     | 1.000    | 1.000   |
| CDY1     | 101         | 0         | 0.00%         | 196          | 0         | 0.00%         | 1.00 [0e+00-Inf]     | 1.000    | 1.000   |
| CDY2B    | 101         | 0         | 0.00%         | 196          | 0         | 0.00%         | 1.00 [0e+00-Inf]     | 1.000    | 1.000   |
| CEBPB    | 101         | 6         | 5.94%         | 196          | 14        | 7.14%         | 1.22 [0.53-2.79]     | 0.696    | 0.951   |
| CEBPD    | 101         | 14        | 13.86%        | 196          | 28        | 14.29%        | 1.04 [0.58-1.85]     | 0.921    | 1.000   |
| CELF3    | 101         | 6         | 5.94%         | 196          | 12        | 6.12%         | 1.03 [0.44-2.41]     | 0.950    | 1.000   |
| CELF6    | 101         | 1         | 0.99%         | 196          | 4         | 2.04%         | 2.08 [0.33-13.25]    | 0.514    | 0.805   |
| CEMP1    | 101         | 6         | 5.94%         | 196          | 5         | 2.55%         | 0.41 [0.15-1.15]     | 0.154    | 0.535   |
| CENPF    | 101         | 6         | 5.94%         | 196          | 20        | 10.20%        | 1.80 [0.81-3.98]     | 0.224    | 0.596   |
| CENPL    | 101         | 5         | 4.95%         | 196          | 13        | 6.63%         | 1.36 [0.56-3.32]     | 0.566    | 0.852   |
| CEP170   | 101         | 5         | 4.95%         | 196          | 19        | 9.69%         | 2.06 [0.88-4.83]     | 0.163    | 0.535   |
| CEP250   | 101         | 4         | 3.96%         | 196          | 8         | 4.08%         | 1.03 [0.37-2.88]     | 0.960    | 1.000   |
| CEP290   | 101         | 0         | 0.00%         | 196          | 5         | 2.55%         | 2.2e+07 [0e+00-Inf]  | 0.992    | 1.000   |
| CEP350   | 101         | 6         | 5.94%         | 196          | 19        | 9.69%         | 1.70 [0.77-3.78]     | 0.274    | 0.643   |
| CFHR1    | 101         | 7         | 6.93%         | 196          | 24        | 12.24%        | 1.87 [0.90-3.92]     | 0.161    | 0.535   |
| CFHR2    | 101         | 6         | 5.94%         | 196          | 20        | 10.20%        | 1.80 [0.81-3.98]     | 0.224    | 0.596   |
| CFHR3    | 101         | 7         | 6.93%         | 196          | 27        | 13.78%        | 2.15 [1.03-4.45]     | 0.085    | 0.507   |
| CFHR4    | 101         | 4         | 3.96%         | 196          | 19        | 9.69%         | 2.60 [1.03-6.59]     | 0.090    | 0.507   |
| CFHR5    | 101         | 5         | 4.95%         | 196          | 21        | 10.71%        | 2.30 [0.99-5.36]     | 0.104    | 0.507   |
| CFH      | 101         | 4         | 3.96%         | 196          | 21        | 10.71%        | 2.91 [1.16-7.31]     | 0.056    | 0.507   |
| CFL2     | 101         | 0         | 0.00%         | 196          | 9         | 4.59%         | 4.1e+07 [0e+00-Inf]  | 0.992    | 1.000   |
| CGN      | 101         | 6         | 5.94%         | 196          | 13        | 6.63%         | 1.12 [0.49-2.60]     | 0.817    | 1.000   |
| CHAD     | 101         | 4         | 3.96%         | 196          | 20        | 10.20%        | 2.76 [1.09-6.95]     | 0.071    | 0.507   |
| CHCHD1   | 101         | 0         | 0.00%         | 196          | 5         | 2.55%         | 2.2e+07 [0e+00-Inf]  | 0.992    | 1.000   |
| CHCHD7   | 101         | 14        | 13.86%        | 196          | 31        | 15.82%        | 1.17 [0.66-2.07]     | 0.656    | 0.931   |
| COA4     | 101         | 7         | 6.93%         | 196          | 12        | 6.12%         | 0.88 [0.39-1.97]     | 0.788    | 0.996   |
| CHD1L    | 101         | 6         | 5.94%         | 196          | 12        | 6.12%         | 1.03 [0.44-2.41]     | 0.950    | 1.000   |
| CHD2     | 101         | 0         | 0.00%         | 196          | 6         | 3.06%         | 2.7e+07 [0e+00-Inf]  | 0.992    | 1.000   |
| CHD6     | 101         | 2         | 1.98%         | 196          | 4         | 2.04%         | 1.03 [0.24-4.35]     | 0.972    | 1.000   |
| CHD7     | 101         | 16        | 15.84%        | 196          | 31        | 15.82%        | 1.00 [0.57-1.73]     | 0.995    | 1.000   |
| CHI3L1   | 101         | 7         | 6.93%         | 196          | 28        | 14.29%        | 2.24 [1.08-4.63]     | 0.068    | 0.507   |
| CHIT1    | 101         | 7         | 6.93%         | 196          | 28        | 14.29%        | 2.24 [1.08-4.63]     | 0.068    | 0.507   |
| CHKA     | 101         | 8         | 7.92%         | 196          | 21        | 10.71%        | 1.39 [0.68-2.85]     | 0.444    | 0.805   |
| CHML     | 101         | 4         | 3.96%         | 196          | 20        | 10.20%        | 2.76 [1.09-6.95]     | 0.071    | 0.507   |
| CHMP4C   | 101         | 18        | 17.82%        | 196          | 46        | 23.47%        | 1.41 [0.85-2.35]     | 0.263    | 0.643   |
| CHMP6    | 101         | 2         | 1.98%         | 196          | 12        | 6.12%         | 3.23 [0.90-11.53]    | 0.130    | 0.535   |
| CHN2     | 101         | 0         | 0.00%         | 196          | 6         | 3.06%         | 2.7e+07 [0e+00-Inf]  | 0.992    | 1.000   |
| CHORDC1  | 101         | 1         | 0.99%         | 196          | 4         | 2.04%         | 2.08 [0.33-13.25]    | 0.514    | 0.805   |
| CHP2     | 101         | 5         | 4.95%         | 196          | 3         | 1.53%         | 0.30 [0.088-1.01]    | 0.103    | 0.507   |
| CHRAC1   | 101         | 17        | 16.83%        | 196          | 50        | 25.51%        | 1.69 [1.01-2.83]     | 0.092    | 0.507   |
| CHRD1L   | 101         | 5         | 4.95%         | 196          | 13        | 6.63%         | 1.36 [0.56-3.32]     | 0.566    | 0.852   |
| CHRD     | 101         | 3         | 2.97%         | 196          | 2         | 1.02%         | 0.34 [0.074-1.53]    | 0.237    | 0.599   |
| CHRM3    | 101         | 5         | 4.95%         | 196          | 20        | 10.20%        | 2.18 [0.93-5.10]     | 0.130    | 0.535   |
| CHRNA4   | 101         | 7         | 6.93%         | 196          | 13        | 6.63%         | 0.95 [0.43-2.12]     | 0.923    | 1.000   |
| CHRNA6   | 101         | 14        | 13.86%        | 196          | 28        | 14.29%        | 1.04 [0.58-1.85]     | 0.921    | 1.000   |
| CHRN2    | 101         | 7         | 6.93%         | 196          | 12        | 6.12%         | 0.88 [0.39-1.97]     | 0.788    | 0.996   |
| CHRN3    | 101         | 14        | 13.86%        | 196          | 28        | 14.29%        | 1.04 [0.58-1.85]     | 0.921    | 1.000   |
| CHTF18   | 101         | 6         | 5.94%         | 196          | 4         | 2.04%         | 0.33 [0.11-0.97]     | 0.092    | 0.507   |
| CIB1     | 101         | 2         | 1.98%         | 196          | 8         | 4.08%         | 2.11 [0.56-7.86]     | 0.352    | 0.722   |
| CIB2     | 101         | 1         | 0.99%         | 196          | 4         | 2.04%         | 2.08 [0.33-13.25]    | 0.514    | 0.805   |
| CIITA    | 101         | 5         | 4.95%         | 196          | 4         | 2.04%         | 0.40 [0.13-1.23]     | 0.179    | 0.535   |
| CISD3    | 101         | 5         | 4.95%         | 196          | 9         | 4.59%         | 0.92 [0.36-2.37]     | 0.890    | 1.000   |
| CKS1B    | 101         | 8         | 7.92%         | 196          | 15        | 7.65%         | 0.96 [0.46-2.04]     | 0.935    | 1.000   |
| CLCF1    | 101         | 11        | 10.89%        | 196          | 17        | 8.67%         | 0.78 [0.40-1.52]     | 0.536    | 0.834   |
| CLCN2    | 101         | 3         | 2.97%         | 196          | 2         | 1.02%         | 0.34 [0.074-1.53]    | 0.237    | 0.599   |
| CLCN7    | 101         | 7         | 6.93%         | 196          | 5         | 2.55%         | 0.35 [0.13-0.94]     | 0.081    | 0.507   |
| CLDN11   | 101         | 2         | 1.98%         | 196          | 3         | 1.53%         | 0.77 [0.17-3.50]     | 0.776    | 0.996   |
| CLDN16   | 101         | 2         | 1.98%         | 196          | 3         | 1.53%         | 0.77 [0.17-3.50]     | 0.776    | 0.996   |

| Symbol    | CINSARC Low |           |               | CINSARC High |           |               | CINSARC High vs. Low |          |         |
|-----------|-------------|-----------|---------------|--------------|-----------|---------------|----------------------|----------|---------|
|           | N tested    | N altered | Fq alteration | N tested     | N altered | Fq alteration | OR [95%CI]           | p-value* | q-value |
| CLDN1     | 101         | 2         | 1.98%         | 196          | 3         | 1.53%         | 0.77 [0.17-3.50]     | 0.776    | 0.996   |
| CLDN6     | 101         | 6         | 5.94%         | 196          | 5         | 2.55%         | 0.41 [0.15-1.15]     | 0.154    | 0.535   |
| CLDN9     | 101         | 6         | 5.94%         | 196          | 5         | 2.55%         | 0.41 [0.15-1.15]     | 0.154    | 0.535   |
| CLEC14A   | 101         | 0         | 0.00%         | 196          | 8         | 4.08%         | 3.6e+07 [0e+00-Inf]  | 0.992    | 1.000   |
| CLEC16A   | 101         | 5         | 4.95%         | 196          | 4         | 2.04%         | 0.40 [0.13-1.23]     | 0.179    | 0.535   |
| CLK2      | 101         | 7         | 6.93%         | 196          | 14        | 7.14%         | 1.03 [0.47-2.28]     | 0.946    | 1.000   |
| CLLU10S   | 101         | 0         | 0.00%         | 196          | 5         | 2.55%         | 2.2e+07 [0e+00-Inf]  | 0.992    | 1.000   |
| CLLU1     | 101         | 0         | 0.00%         | 196          | 5         | 2.55%         | 2.2e+07 [0e+00-Inf]  | 0.992    | 1.000   |
| CLN3      | 101         | 5         | 4.95%         | 196          | 3         | 1.53%         | 0.30 [0.088-1.01]    | 0.103    | 0.507   |
| CLNS1A    | 101         | 10        | 9.90%         | 196          | 21        | 10.71%        | 1.09 [0.56-2.13]     | 0.828    | 1.000   |
| CLPB      | 101         | 5         | 4.95%         | 196          | 9         | 4.59%         | 0.92 [0.36-2.37]     | 0.890    | 1.000   |
| CLRN1-AS1 | 101         | 3         | 2.97%         | 196          | 2         | 1.02%         | 0.34 [0.074-1.53]    | 0.237    | 0.599   |
| CLRN1     | 101         | 3         | 2.97%         | 196          | 2         | 1.02%         | 0.34 [0.074-1.53]    | 0.237    | 0.599   |
| CLTC      | 101         | 9         | 8.91%         | 196          | 33        | 16.84%        | 2.07 [1.08-3.98]     | 0.068    | 0.507   |
| CLUAP1    | 101         | 5         | 4.95%         | 196          | 4         | 2.04%         | 0.40 [0.13-1.23]     | 0.179    | 0.535   |
| CLVS1     | 101         | 15        | 14.85%        | 196          | 30        | 15.31%        | 1.04 [0.59-1.82]     | 0.918    | 1.000   |
| CNBD1     | 101         | 16        | 15.84%        | 196          | 47        | 23.98%        | 1.68 [0.99-2.84]     | 0.106    | 0.507   |
| CNGB3     | 101         | 17        | 16.83%        | 196          | 48        | 24.49%        | 1.60 [0.96-2.68]     | 0.133    | 0.535   |
| CNIH2     | 101         | 2         | 1.98%         | 196          | 5         | 2.55%         | 1.30 [0.32-5.21]     | 0.759    | 0.996   |
| CNIH3     | 101         | 6         | 5.94%         | 196          | 17        | 8.67%         | 1.50 [0.67-3.38]     | 0.407    | 0.774   |
| CNIH4     | 101         | 7         | 6.93%         | 196          | 17        | 8.67%         | 1.28 [0.59-2.75]     | 0.602    | 0.887   |
| CNOT2     | 101         | 3         | 2.97%         | 196          | 16        | 8.16%         | 2.90 [1.01-8.34]     | 0.097    | 0.507   |
| CNST      | 101         | 5         | 4.95%         | 196          | 18        | 9.18%         | 1.94 [0.82-4.58]     | 0.203    | 0.570   |
| CNTFR     | 101         | 1         | 0.99%         | 196          | 4         | 2.04%         | 2.08 [0.33-13.25]    | 0.514    | 0.805   |
| CNTN2     | 101         | 7         | 6.93%         | 196          | 26        | 13.27%        | 2.05 [0.99-4.27]     | 0.106    | 0.507   |
| COCH      | 101         | 1         | 0.99%         | 196          | 8         | 4.08%         | 4.26 [0.73-24.65]    | 0.175    | 0.535   |
| COG1      | 101         | 5         | 4.95%         | 196          | 18        | 9.18%         | 1.94 [0.82-4.58]     | 0.203    | 0.570   |
| COG2      | 101         | 6         | 5.94%         | 196          | 19        | 9.69%         | 1.70 [0.77-3.78]     | 0.274    | 0.643   |
| COG7      | 101         | 5         | 4.95%         | 196          | 2         | 1.02%         | 0.20 [0.049-0.80]    | 0.056    | 0.507   |
| COIL      | 101         | 7         | 6.93%         | 196          | 23        | 11.73%        | 1.79 [0.85-3.74]     | 0.198    | 0.570   |
| COL14A1   | 101         | 15        | 14.85%        | 196          | 54        | 27.55%        | 2.18 [1.28-3.70]     | 1.56E-02 | 0.507   |
| COL1A1    | 101         | 5         | 4.95%         | 196          | 17        | 8.67%         | 1.82 [0.77-4.32]     | 0.252    | 0.623   |
| COL20A1   | 101         | 7         | 6.93%         | 196          | 13        | 6.63%         | 0.95 [0.43-2.12]     | 0.923    | 1.000   |
| COL22A1   | 101         | 15        | 14.85%        | 196          | 51        | 26.02%        | 2.02 [1.18-3.43]     | 3.03E-02 | 0.507   |
| COL9A3    | 101         | 7         | 6.93%         | 196          | 14        | 7.14%         | 1.03 [0.47-2.28]     | 0.946    | 1.000   |
| COLEC10   | 101         | 15        | 14.85%        | 196          | 59        | 30.10%        | 2.47 [1.46-4.18]     | 4.76E-03 | 0.507   |
| COMMD5    | 101         | 17        | 16.83%        | 196          | 49        | 25.00%        | 1.65 [0.98-2.76]     | 0.111    | 0.511   |
| COMTD1    | 101         | 2         | 1.98%         | 196          | 6         | 3.06%         | 1.56 [0.40-6.08]     | 0.589    | 0.869   |
| COPA      | 101         | 6         | 5.94%         | 196          | 13        | 6.63%         | 1.12 [0.49-2.60]     | 0.817    | 1.000   |
| COPSS     | 101         | 15        | 14.85%        | 196          | 39        | 19.90%        | 1.42 [0.82-2.46]     | 0.287    | 0.650   |
| COPZ2     | 101         | 1         | 0.99%         | 196          | 12        | 6.12%         | 6.52 [1.16-36.57]    | 0.074    | 0.507   |
| COQ7      | 101         | 5         | 4.95%         | 196          | 4         | 2.04%         | 0.40 [0.13-1.23]     | 0.179    | 0.535   |
| CORO1A    | 101         | 4         | 3.96%         | 196          | 4         | 2.04%         | 0.51 [0.16-1.65]     | 0.342    | 0.716   |
| CORO1B    | 101         | 11        | 10.89%        | 196          | 20        | 10.20%        | 0.93 [0.48-1.79]     | 0.854    | 1.000   |
| CORO6     | 101         | 3         | 2.97%         | 196          | 5         | 2.55%         | 0.86 [0.25-2.89]     | 0.833    | 1.000   |
| CORO7     | 101         | 5         | 4.95%         | 196          | 6         | 3.06%         | 0.61 [0.22-1.68]     | 0.418    | 0.779   |
| COX11     | 101         | 7         | 6.93%         | 196          | 18        | 9.18%         | 1.36 [0.63-2.91]     | 0.509    | 0.805   |
| COX18     | 101         | 1         | 0.99%         | 196          | 6         | 3.06%         | 3.16 [0.53-18.88]    | 0.290    | 0.650   |
| COX6A2    | 101         | 4         | 3.96%         | 196          | 4         | 2.04%         | 0.51 [0.16-1.65]     | 0.342    | 0.716   |
| COX6B2    | 101         | 1         | 0.99%         | 196          | 4         | 2.04%         | 2.08 [0.33-13.25]    | 0.514    | 0.805   |
| COX6C     | 101         | 15        | 14.85%        | 196          | 56        | 28.57%        | 2.29 [1.35-3.89]     | 9.81E-03 | 0.507   |
| CCP110    | 101         | 5         | 4.95%         | 196          | 4         | 2.04%         | 0.40 [0.13-1.23]     | 0.179    | 0.535   |
| CPA6      | 101         | 15        | 14.85%        | 196          | 37        | 18.88%        | 1.33 [0.77-2.31]     | 0.388    | 0.757   |
| CPD       | 101         | 2         | 1.98%         | 196          | 3         | 1.53%         | 0.77 [0.17-3.50]     | 0.776    | 0.996   |
| CPEB1     | 101         | 1         | 0.99%         | 196          | 4         | 2.04%         | 2.08 [0.33-13.25]    | 0.514    | 0.805   |
| CPLX4     | 101         | 1         | 0.99%         | 196          | 4         | 2.04%         | 2.08 [0.33-13.25]    | 0.514    | 0.805   |
| CPM       | 101         | 2         | 1.98%         | 196          | 19        | 9.69%         | 5.31 [1.54-18.36]    | 2.67E-02 | 0.507   |
| CPN2      | 101         | 3         | 2.97%         | 196          | 3         | 1.53%         | 0.51 [0.13-1.98]     | 0.412    | 0.774   |
| CPNE1     | 101         | 4         | 3.96%         | 196          | 8         | 4.08%         | 1.03 [0.37-2.88]     | 0.960    | 1.000   |
| CPNE3     | 101         | 18        | 17.82%        | 196          | 48        | 24.49%        | 1.50 [0.90-2.48]     | 0.192    | 0.563   |
| CPPED1    | 101         | 5         | 4.95%         | 196          | 3         | 1.53%         | 0.30 [0.088-1.01]    | 0.103    | 0.507   |
| CPSF1     | 101         | 18        | 17.82%        | 196          | 49        | 25.00%        | 1.54 [0.93-2.55]     | 0.163    | 0.535   |
| CPSF4L    | 101         | 5         | 4.95%         | 196          | 17        | 8.67%         | 1.82 [0.77-4.32]     | 0.252    | 0.623   |
| CPSF6     | 101         | 3         | 2.97%         | 196          | 19        | 9.69%         | 3.51 [1.24-9.95]     | 4.78E-02 | 0.507   |
| CPSF7     | 101         | 1         | 0.99%         | 196          | 4         | 2.04%         | 2.08 [0.33-13.25]    | 0.514    | 0.805   |
| CPT1A     | 101         | 12        | 11.88%        | 196          | 34        | 17.35%        | 1.56 [0.86-2.82]     | 0.220    | 0.596   |
| CPVL      | 101         | 0         | 0.00%         | 196          | 7         | 3.57%         | 3.2e+07 [0e+00-Inf]  | 0.992    | 1.000   |
| CP        | 101         | 3         | 2.97%         | 196          | 2         | 1.02%         | 0.34 [0.074-1.53]    | 0.237    | 0.599   |
| CR1L      | 101         | 7         | 6.93%         | 196          | 24        | 12.24%        | 1.87 [0.90-3.92]     | 0.161    | 0.535   |
| CR1       | 101         | 6         | 5.94%         | 196          | 24        | 12.24%        | 2.21 [1.01-4.82]     | 0.095    | 0.507   |
| CR2       | 101         | 6         | 5.94%         | 196          | 24        | 12.24%        | 2.21 [1.01-4.82]     | 0.095    | 0.507   |

| Symbol   | CINSARC Low |           |               | CINSARC High |           |               | CINSARC High vs. Low |          |         |
|----------|-------------|-----------|---------------|--------------|-----------|---------------|----------------------|----------|---------|
|          | N tested    | N altered | Fq alteration | N tested     | N altered | Fq alteration | OR [95%CI]           | p-value* | q-value |
| CRABP2   | 101         | 7         | 6.93%         | 196          | 8         | 4.08%         | 0.57 [0.24-1.37]     | 0.294    | 0.650   |
| CRB1     | 101         | 5         | 4.95%         | 196          | 21        | 10.71%        | 2.30 [0.99-5.36]     | 0.104    | 0.507   |
| CRCT1    | 101         | 7         | 6.93%         | 196          | 13        | 6.63%         | 0.95 [0.43-2.12]     | 0.923    | 1.000   |
| CREB3L4  | 101         | 7         | 6.93%         | 196          | 13        | 6.63%         | 0.95 [0.43-2.12]     | 0.923    | 1.000   |
| CREB5    | 101         | 0         | 0.00%         | 196          | 7         | 3.57%         | 3.2e+07 [0e+00-Inf]  | 0.992    | 1.000   |
| CREBBP   | 101         | 5         | 4.95%         | 196          | 5         | 2.55%         | 0.50 [0.17-1.45]     | 0.286    | 0.650   |
| CREBZF   | 101         | 2         | 1.98%         | 196          | 3         | 1.53%         | 0.77 [0.17-3.50]     | 0.776    | 0.996   |
| CREG1    | 101         | 5         | 4.95%         | 196          | 12        | 6.12%         | 1.25 [0.51-3.08]     | 0.681    | 0.943   |
| CRHR2    | 101         | 0         | 0.00%         | 196          | 7         | 3.57%         | 3.2e+07 [0e+00-Inf]  | 0.992    | 1.000   |
| CRH      | 101         | 15        | 14.85%        | 196          | 37        | 18.88%        | 1.33 [0.77-2.31]     | 0.388    | 0.757   |
| CRISPLD1 | 101         | 14        | 13.86%        | 196          | 41        | 20.92%        | 1.64 [0.94-2.86]     | 0.141    | 0.535   |
| CRLF3    | 101         | 2         | 1.98%         | 196          | 4         | 2.04%         | 1.03 [0.24-4.35]     | 0.972    | 1.000   |
| CRNN     | 101         | 7         | 6.93%         | 196          | 13        | 6.63%         | 0.95 [0.43-2.12]     | 0.923    | 1.000   |
| CRP      | 101         | 6         | 5.94%         | 196          | 10        | 5.10%         | 0.85 [0.36-2.04]     | 0.762    | 0.996   |
| CRTC2    | 101         | 7         | 6.93%         | 196          | 13        | 6.63%         | 0.95 [0.43-2.12]     | 0.923    | 1.000   |
| CRTC3    | 101         | 1         | 0.99%         | 196          | 6         | 3.06%         | 3.16 [0.53-18.88]    | 0.290    | 0.650   |
| CRYBA1   | 101         | 3         | 2.97%         | 196          | 5         | 2.55%         | 0.86 [0.25-2.89]     | 0.833    | 1.000   |
| CRYM     | 101         | 5         | 4.95%         | 196          | 2         | 1.02%         | 0.20 [0.049-0.80]    | 0.056    | 0.507   |
| YBX3P1   | 101         | 4         | 3.96%         | 196          | 4         | 2.04%         | 0.51 [0.16-1.65]     | 0.342    | 0.716   |
| CSE1L    | 101         | 6         | 5.94%         | 196          | 7         | 3.57%         | 0.59 [0.23-1.50]     | 0.349    | 0.722   |
| CSF3     | 101         | 5         | 4.95%         | 196          | 11        | 5.61%         | 1.14 [0.46-2.84]     | 0.811    | 1.000   |
| CSH1     | 101         | 8         | 7.92%         | 196          | 29        | 14.80%        | 2.02 [1.01-4.03]     | 0.094    | 0.507   |
| CSH2     | 101         | 8         | 7.92%         | 196          | 29        | 14.80%        | 2.02 [1.01-4.03]     | 0.094    | 0.507   |
| CSHL1    | 101         | 8         | 7.92%         | 196          | 29        | 14.80%        | 2.02 [1.01-4.03]     | 0.094    | 0.507   |
| CSMD1    | 101         | 1         | 0.99%         | 196          | 0         | 0.00%         | 1.6e-08 [0e+00-Inf]  | 0.996    | 1.000   |
| CSMD3    | 101         | 16        | 15.84%        | 196          | 51        | 26.02%        | 1.87 [1.11-3.15]     | 4.89E-02 | 0.507   |
| CSNK1D   | 101         | 2         | 1.98%         | 196          | 13        | 6.63%         | 3.52 [0.99-12.47]    | 0.102    | 0.507   |
| CSPP1    | 101         | 15        | 14.85%        | 196          | 39        | 19.90%        | 1.42 [0.82-2.46]     | 0.287    | 0.650   |
| CSRP1    | 101         | 7         | 6.93%         | 196          | 23        | 11.73%        | 1.79 [0.85-3.74]     | 0.198    | 0.570   |
| CSRP2    | 101         | 0         | 0.00%         | 196          | 8         | 4.08%         | 3.6e+07 [0e+00-Inf]  | 0.992    | 1.000   |
| CSRP3    | 101         | 1         | 0.99%         | 196          | 4         | 2.04%         | 2.08 [0.33-13.25]    | 0.514    | 0.805   |
| CST6     | 101         | 0         | 0.00%         | 196          | 5         | 2.55%         | 2.2e+07 [0e+00-Inf]  | 0.992    | 1.000   |
| CSTF1    | 101         | 8         | 7.92%         | 196          | 13        | 6.63%         | 0.83 [0.38-1.78]     | 0.682    | 0.943   |
| CTAGE4   | 101         | 6         | 5.94%         | 196          | 10        | 5.10%         | 0.85 [0.36-2.04]     | 0.762    | 0.996   |
| CTAGE6   | 101         | 4         | 3.96%         | 196          | 5         | 2.55%         | 0.63 [0.21-1.95]     | 0.505    | 0.805   |
| CTCFL    | 101         | 9         | 8.91%         | 196          | 17        | 8.67%         | 0.97 [0.48-1.97]     | 0.945    | 1.000   |
| CTDSP2   | 101         | 0         | 0.00%         | 196          | 5         | 2.55%         | 2.2e+07 [0e+00-Inf]  | 0.992    | 1.000   |
| CTF1     | 101         | 4         | 3.96%         | 196          | 5         | 2.55%         | 0.63 [0.21-1.95]     | 0.505    | 0.805   |
| CTHRC1   | 101         | 16        | 15.84%        | 196          | 55        | 28.06%        | 2.07 [1.23-3.48]     | 2.09E-02 | 0.507   |
| CTNNBL1  | 101         | 5         | 4.95%         | 196          | 4         | 2.04%         | 0.40 [0.13-1.23]     | 0.179    | 0.535   |
| CTSA     | 101         | 5         | 4.95%         | 196          | 4         | 2.04%         | 0.40 [0.13-1.23]     | 0.179    | 0.535   |
| CTSC     | 101         | 1         | 0.99%         | 196          | 4         | 2.04%         | 2.08 [0.33-13.25]    | 0.514    | 0.805   |
| CTSE     | 101         | 7         | 6.93%         | 196          | 24        | 12.24%        | 1.87 [0.90-3.92]     | 0.161    | 0.535   |
| CTSF     | 101         | 5         | 4.95%         | 196          | 13        | 6.63%         | 1.36 [0.56-3.32]     | 0.566    | 0.852   |
| CTSK     | 101         | 8         | 7.92%         | 196          | 15        | 7.65%         | 0.96 [0.46-2.04]     | 0.935    | 1.000   |
| CTSS     | 101         | 8         | 7.92%         | 196          | 16        | 8.16%         | 1.03 [0.49-2.17]     | 0.942    | 1.000   |
| CTSZ     | 101         | 9         | 8.91%         | 196          | 15        | 7.65%         | 0.85 [0.41-1.75]     | 0.707    | 0.962   |
| CTTN     | 101         | 17        | 16.83%        | 196          | 51        | 26.02%        | 1.74 [1.04-2.90]     | 0.076    | 0.507   |
| CUEDC1   | 101         | 6         | 5.94%         | 196          | 25        | 12.76%        | 2.31 [1.06-5.03]     | 0.076    | 0.507   |
| CWC25    | 101         | 4         | 3.96%         | 196          | 10        | 5.10%         | 1.30 [0.48-3.53]     | 0.661    | 0.935   |
| CXADRP2  | 101         | 1         | 0.99%         | 196          | 4         | 2.04%         | 2.08 [0.33-13.25]    | 0.514    | 0.805   |
| CXCL10   | 101         | 1         | 0.99%         | 196          | 5         | 2.55%         | 2.62 [0.43-16.05]    | 0.383    | 0.750   |
| CXCL11   | 101         | 1         | 0.99%         | 196          | 5         | 2.55%         | 2.62 [0.43-16.05]    | 0.383    | 0.750   |
| CXCL1    | 101         | 1         | 0.99%         | 196          | 6         | 3.06%         | 3.16 [0.53-18.88]    | 0.290    | 0.650   |
| CXCL2    | 101         | 2         | 1.98%         | 196          | 6         | 3.06%         | 1.56 [0.40-6.08]     | 0.589    | 0.869   |
| CXCL3    | 101         | 2         | 1.98%         | 196          | 6         | 3.06%         | 1.56 [0.40-6.08]     | 0.589    | 0.869   |
| CXCL5    | 101         | 2         | 1.98%         | 196          | 6         | 3.06%         | 1.56 [0.40-6.08]     | 0.589    | 0.869   |
| CXCL6    | 101         | 1         | 0.99%         | 196          | 6         | 3.06%         | 3.16 [0.53-18.88]    | 0.290    | 0.650   |
| CXCL9    | 101         | 1         | 0.99%         | 196          | 5         | 2.55%         | 2.62 [0.43-16.05]    | 0.383    | 0.750   |
| CYB561   | 101         | 8         | 7.92%         | 196          | 31        | 15.82%        | 2.18 [1.10-4.34]     | 0.061    | 0.507   |
| CYB5R1   | 101         | 7         | 6.93%         | 196          | 28        | 14.29%        | 2.24 [1.08-4.63]     | 0.068    | 0.507   |
| CYB561A3 | 101         | 1         | 0.99%         | 196          | 4         | 2.04%         | 2.08 [0.33-13.25]    | 0.514    | 0.805   |
| CYC1     | 101         | 17        | 16.83%        | 196          | 51        | 26.02%        | 1.74 [1.04-2.90]     | 0.076    | 0.507   |
| CYCSP52  | 101         | 6         | 5.94%         | 196          | 8         | 4.08%         | 0.67 [0.27-1.68]     | 0.476    | 0.805   |
| CYCS     | 101         | 0         | 0.00%         | 196          | 7         | 3.57%         | 3.2e+07 [0e+00-Inf]  | 0.992    | 1.000   |
| CYGB     | 101         | 3         | 2.97%         | 196          | 15        | 7.65%         | 2.71 [0.94-7.82]     | 0.122    | 0.534   |
| CYHR1    | 101         | 18        | 17.82%        | 196          | 49        | 25.00%        | 1.54 [0.93-2.55]     | 0.163    | 0.535   |
| CYP11B1  | 101         | 16        | 15.84%        | 196          | 49        | 25.00%        | 1.77 [1.05-2.99]     | 0.073    | 0.507   |
| CYP11B2  | 101         | 16        | 15.84%        | 196          | 49        | 25.00%        | 1.77 [1.05-2.99]     | 0.073    | 0.507   |
| CYP24A1  | 101         | 12        | 11.88%        | 196          | 23        | 11.73%        | 0.99 [0.53-1.84]     | 0.970    | 1.000   |
| CYP27B1  | 101         | 0         | 0.00%         | 196          | 5         | 2.55%         | 2.2e+07 [0e+00-Inf]  | 0.992    | 1.000   |

| Symbol     | CINSARC Low |           |               | CINSARC High |           |               | CINSARC High vs. Low |          |         |
|------------|-------------|-----------|---------------|--------------|-----------|---------------|----------------------|----------|---------|
|            | N tested    | N altered | Fq alteration | N tested     | N altered | Fq alteration | OR [95%CI]           | p-value* | q-value |
| CYP7A1     | 101         | 14        | 13.86%        | 196          | 33        | 16.84%        | 1.26 [0.71-2.22]     | 0.506    | 0.805   |
| CYP7B1     | 101         | 15        | 14.85%        | 196          | 33        | 16.84%        | 1.16 [0.66-2.03]     | 0.660    | 0.935   |
| CYTH1      | 101         | 3         | 2.97%         | 196          | 14        | 7.14%         | 2.51 [0.86-7.30]     | 0.155    | 0.535   |
| DAP3       | 101         | 7         | 6.93%         | 196          | 9         | 4.59%         | 0.65 [0.27-1.52]     | 0.401    | 0.774   |
| DARS2      | 101         | 5         | 4.95%         | 196          | 13        | 6.63%         | 1.36 [0.56-3.32]     | 0.566    | 0.852   |
| DAZ1       | 101         | 0         | 0.00%         | 196          | 0         | 0.00%         | 1.00 [0e+00-Inf]     | 1.000    | 1.000   |
| DAZ2       | 101         | 0         | 0.00%         | 196          | 0         | 0.00%         | 1.00 [0e+00-Inf]     | 1.000    | 1.000   |
| DAZ3       | 101         | 0         | 0.00%         | 196          | 0         | 0.00%         | 1.00 [0e+00-Inf]     | 1.000    | 1.000   |
| DAZ4       | 101         | 0         | 0.00%         | 196          | 0         | 0.00%         | 1.00 [0e+00-Inf]     | 1.000    | 1.000   |
| DBNDD2     | 101         | 5         | 4.95%         | 196          | 3         | 1.53%         | 0.30 [0.088-1.01]    | 0.103    | 0.507   |
| DCAF13     | 101         | 16        | 15.84%        | 196          | 55        | 28.06%        | 2.07 [1.23-3.48]     | 2.09E-02 | 0.507   |
| DCAF4L2    | 101         | 19        | 18.81%        | 196          | 49        | 25.00%        | 1.44 [0.87-2.37]     | 0.231    | 0.599   |
| DCAF6      | 101         | 4         | 3.96%         | 196          | 12        | 6.12%         | 1.58 [0.60-4.18]     | 0.438    | 0.798   |
| DCAF7      | 101         | 8         | 7.92%         | 196          | 30        | 15.31%        | 2.10 [1.06-4.18]     | 0.076    | 0.507   |
| DCAF8      | 101         | 6         | 5.94%         | 196          | 12        | 6.12%         | 1.03 [0.44-2.41]     | 0.950    | 1.000   |
| ECI1       | 101         | 6         | 5.94%         | 196          | 4         | 2.04%         | 0.33 [0.11-0.97]     | 0.092    | 0.507   |
| DCN        | 101         | 0         | 0.00%         | 196          | 5         | 2.55%         | 2.2e+07 [0e+00-Inf]  | 0.992    | 1.000   |
| DCST1      | 101         | 8         | 7.92%         | 196          | 15        | 7.65%         | 0.96 [0.46-2.04]     | 0.935    | 1.000   |
| DCST2      | 101         | 8         | 7.92%         | 196          | 15        | 7.65%         | 0.96 [0.46-2.04]     | 0.935    | 1.000   |
| DCTN3      | 101         | 1         | 0.99%         | 196          | 4         | 2.04%         | 2.08 [0.33-13.25]    | 0.514    | 0.805   |
| DCTN5      | 101         | 5         | 4.95%         | 196          | 3         | 1.53%         | 0.30 [0.088-1.01]    | 0.103    | 0.507   |
| DCTPP1     | 101         | 4         | 3.96%         | 196          | 5         | 2.55%         | 0.63 [0.21-1.95]     | 0.505    | 0.805   |
| DCUN1D1    | 101         | 3         | 2.97%         | 196          | 2         | 1.02%         | 0.34 [0.074-1.53]    | 0.237    | 0.599   |
| DCUN1D3    | 101         | 5         | 4.95%         | 196          | 2         | 1.02%         | 0.20 [0.049-0.80]    | 0.056    | 0.507   |
| DCXR       | 101         | 2         | 1.98%         | 196          | 13        | 6.63%         | 3.52 [0.99-12.47]    | 0.102    | 0.507   |
| DDB1       | 101         | 2         | 1.98%         | 196          | 4         | 2.04%         | 1.03 [0.24-4.35]     | 0.972    | 1.000   |
| DDHD2      | 101         | 10        | 9.90%         | 196          | 43        | 21.94%        | 2.56 [1.38-4.74]     | 1.23E-02 | 0.507   |
| DDR2       | 101         | 5         | 4.95%         | 196          | 14        | 7.14%         | 1.48 [0.61-3.57]     | 0.467    | 0.805   |
| DDX27      | 101         | 8         | 7.92%         | 196          | 7         | 3.57%         | 0.43 [0.18-1.03]     | 0.114    | 0.512   |
| DDX3Y      | 101         | 0         | 0.00%         | 196          | 0         | 0.00%         | 1.00 [0e+00-Inf]     | 1.000    | 1.000   |
| DDX42      | 101         | 8         | 7.92%         | 196          | 29        | 14.80%        | 2.02 [1.01-4.03]     | 0.094    | 0.507   |
| DDX52      | 101         | 3         | 2.97%         | 196          | 7         | 3.57%         | 1.21 [0.38-3.83]     | 0.786    | 0.996   |
| DDX59      | 101         | 6         | 5.94%         | 196          | 24        | 12.24%        | 2.21 [1.01-4.82]     | 0.095    | 0.507   |
| DDX5       | 101         | 8         | 7.92%         | 196          | 27        | 13.78%        | 1.86 [0.93-3.72]     | 0.143    | 0.535   |
| DECR1      | 101         | 18        | 17.82%        | 196          | 48        | 24.49%        | 1.50 [0.90-2.48]     | 0.192    | 0.563   |
| DECR2      | 101         | 7         | 6.93%         | 196          | 4         | 2.04%         | 0.28 [0.098-0.80]    | 4.63E-02 | 0.507   |
| DEDD       | 101         | 6         | 5.94%         | 196          | 16        | 8.16%         | 1.41 [0.62-3.18]     | 0.490    | 0.805   |
| DEFB108B   | 101         | 6         | 5.94%         | 196          | 8         | 4.08%         | 0.67 [0.27-1.68]     | 0.476    | 0.805   |
| DEGS1      | 101         | 6         | 5.94%         | 196          | 17        | 8.67%         | 1.50 [0.67-3.38]     | 0.407    | 0.774   |
| DENND1B    | 101         | 5         | 4.95%         | 196          | 21        | 10.71%        | 2.30 [0.99-5.36]     | 0.104    | 0.507   |
| DENND3     | 101         | 18        | 17.82%        | 196          | 50        | 25.51%        | 1.58 [0.95-2.62]     | 0.137    | 0.535   |
| DENND4B    | 101         | 7         | 6.93%         | 196          | 13        | 6.63%         | 0.95 [0.43-2.12]     | 0.923    | 1.000   |
| DEPTOR     | 101         | 15        | 14.85%        | 196          | 54        | 27.55%        | 2.18 [1.28-3.70]     | 1.56E-02 | 0.507   |
| DERL1      | 101         | 14        | 13.86%        | 196          | 56        | 28.57%        | 2.49 [1.45-4.27]     | 5.58E-03 | 0.507   |
| DET1       | 101         | 0         | 0.00%         | 196          | 6         | 3.06%         | 2.7e+07 [0e+00-Inf]  | 0.992    | 1.000   |
| DEXI       | 101         | 5         | 4.95%         | 196          | 4         | 2.04%         | 0.40 [0.13-1.23]     | 0.179    | 0.535   |
| DGAT1      | 101         | 18        | 17.82%        | 196          | 50        | 25.51%        | 1.58 [0.95-2.62]     | 0.137    | 0.535   |
| DGAT2      | 101         | 6         | 5.94%         | 196          | 20        | 10.20%        | 1.80 [0.81-3.98]     | 0.224    | 0.596   |
| DGKE       | 101         | 8         | 7.92%         | 196          | 23        | 11.73%        | 1.55 [0.76-3.14]     | 0.311    | 0.680   |
| DHCR7      | 101         | 12        | 11.88%        | 196          | 24        | 12.24%        | 1.03 [0.56-1.92]     | 0.928    | 1.000   |
| DHRS11     | 101         | 3         | 2.97%         | 196          | 5         | 2.55%         | 0.86 [0.25-2.89]     | 0.833    | 1.000   |
| DHRS13     | 101         | 3         | 2.97%         | 196          | 7         | 3.57%         | 1.21 [0.38-3.83]     | 0.786    | 0.996   |
| DHX35      | 101         | 3         | 2.97%         | 196          | 5         | 2.55%         | 0.86 [0.25-2.89]     | 0.833    | 1.000   |
| DHX40      | 101         | 9         | 8.91%         | 196          | 31        | 15.82%        | 1.92 [0.99-3.71]     | 0.103    | 0.507   |
| DHX9       | 101         | 5         | 4.95%         | 196          | 18        | 9.18%         | 1.94 [0.82-4.58]     | 0.203    | 0.570   |
| DIDO1      | 101         | 7         | 6.93%         | 196          | 13        | 6.63%         | 0.95 [0.43-2.12]     | 0.923    | 1.000   |
| DISC1      | 101         | 6         | 5.94%         | 196          | 19        | 9.69%         | 1.70 [0.77-3.78]     | 0.274    | 0.643   |
| DISC2      | 101         | 6         | 5.94%         | 196          | 19        | 9.69%         | 1.70 [0.77-3.78]     | 0.274    | 0.643   |
| DISP1      | 101         | 6         | 5.94%         | 196          | 18        | 9.18%         | 1.60 [0.72-3.57]     | 0.335    | 0.716   |
| DKFZP58614 | 101         | 0         | 0.00%         | 196          | 7         | 3.57%         | 3.2e+07 [0e+00-Inf]  | 0.992    | 1.000   |
| NCR3LG1    | 101         | 1         | 0.99%         | 196          | 4         | 2.04%         | 2.08 [0.33-13.25]    | 0.514    | 0.805   |
| DKK4       | 101         | 14        | 13.86%        | 196          | 32        | 16.33%        | 1.21 [0.69-2.15]     | 0.578    | 0.867   |
| DLG1       | 101         | 3         | 2.97%         | 196          | 5         | 2.55%         | 0.86 [0.25-2.89]     | 0.833    | 1.000   |
| DLGAP4     | 101         | 4         | 3.96%         | 196          | 6         | 3.06%         | 0.77 [0.26-2.26]     | 0.685    | 0.943   |
| DLX3       | 101         | 4         | 3.96%         | 196          | 17        | 8.67%         | 2.30 [0.90-5.88]     | 0.143    | 0.535   |
| DLX4       | 101         | 4         | 3.96%         | 196          | 17        | 8.67%         | 2.30 [0.90-5.88]     | 0.143    | 0.535   |
| DNAH11     | 101         | 0         | 0.00%         | 196          | 6         | 3.06%         | 2.7e+07 [0e+00-Inf]  | 0.992    | 1.000   |
| DNAH14     | 101         | 6         | 5.94%         | 196          | 18        | 9.18%         | 1.60 [0.72-3.57]     | 0.335    | 0.716   |
| DNAH17     | 101         | 3         | 2.97%         | 196          | 14        | 7.14%         | 2.51 [0.86-7.30]     | 0.155    | 0.535   |
| DNAH3      | 101         | 5         | 4.95%         | 196          | 2         | 1.02%         | 0.20 [0.049-0.80]    | 0.056    | 0.507   |
| DNAI2      | 101         | 6         | 5.94%         | 196          | 15        | 7.65%         | 1.31 [0.58-2.98]     | 0.586    | 0.869   |

| Symbol    | CINSARC Low |           |               | CINSARC High |           |               | CINSARC High vs. Low |          |         |
|-----------|-------------|-----------|---------------|--------------|-----------|---------------|----------------------|----------|---------|
|           | N tested    | N altered | Fq alteration | N tested     | N altered | Fq alteration | OR [95%CI]           | p-value* | q-value |
| DNAJA3    | 101         | 5         | 4.95%         | 196          | 6         | 3.06%         | 0.61 [0.22-1.68]     | 0.418    | 0.779   |
| DNAJB13   | 101         | 7         | 6.93%         | 196          | 12        | 6.12%         | 0.88 [0.39-1.97]     | 0.788    | 0.996   |
| DNAJB5    | 101         | 1         | 0.99%         | 196          | 4         | 2.04%         | 2.08 [0.33-13.25]    | 0.514    | 0.805   |
| DNAJB6    | 101         | 1         | 0.99%         | 196          | 4         | 2.04%         | 2.08 [0.33-13.25]    | 0.514    | 0.805   |
| DNAJC19   | 101         | 4         | 3.96%         | 196          | 2         | 1.02%         | 0.25 [0.059-1.05]    | 0.113    | 0.511   |
| DNAJCSB   | 101         | 15        | 14.85%        | 196          | 37        | 18.88%        | 1.33 [0.77-2.31]     | 0.388    | 0.757   |
| DNAJCS    | 101         | 6         | 5.94%         | 196          | 12        | 6.12%         | 1.03 [0.44-2.41]     | 0.950    | 1.000   |
| DNAJC9    | 101         | 0         | 0.00%         | 196          | 5         | 2.55%         | 2.2e+07 [0e+00-Inf]  | 0.992    | 1.000   |
| DNASE1L2  | 101         | 6         | 5.94%         | 196          | 4         | 2.04%         | 0.33 [0.11-0.97]     | 0.092    | 0.507   |
| DNASE1    | 101         | 7         | 6.93%         | 196          | 4         | 2.04%         | 0.28 [0.098-0.80]    | 4.63E-02 | 0.507   |
| DNM3      | 101         | 5         | 4.95%         | 196          | 13        | 6.63%         | 1.36 [0.56-3.32]     | 0.566    | 0.852   |
| DNTTIP1   | 101         | 5         | 4.95%         | 196          | 4         | 2.04%         | 0.40 [0.13-1.23]     | 0.179    | 0.535   |
| DOC2A     | 101         | 5         | 4.95%         | 196          | 4         | 2.04%         | 0.40 [0.13-1.23]     | 0.179    | 0.535   |
| DOK5      | 101         | 10        | 9.90%         | 196          | 17        | 8.67%         | 0.86 [0.43-1.72]     | 0.728    | 0.986   |
| DPH3P1    | 101         | 7         | 6.93%         | 196          | 14        | 7.14%         | 1.03 [0.47-2.28]     | 0.946    | 1.000   |
| DPM1      | 101         | 6         | 5.94%         | 196          | 14        | 7.14%         | 1.22 [0.53-2.79]     | 0.696    | 0.951   |
| DPM3      | 101         | 7         | 6.93%         | 196          | 13        | 6.63%         | 0.95 [0.43-2.12]     | 0.923    | 1.000   |
| DPP3      | 101         | 5         | 4.95%         | 196          | 11        | 5.61%         | 1.14 [0.46-2.84]     | 0.811    | 1.000   |
| DPRXP4    | 101         | 2         | 1.98%         | 196          | 3         | 1.53%         | 0.77 [0.17-3.50]     | 0.776    | 0.996   |
| DPT       | 101         | 5         | 4.95%         | 196          | 13        | 6.63%         | 1.36 [0.56-3.32]     | 0.566    | 0.852   |
| DPY19L1   | 101         | 0         | 0.00%         | 196          | 5         | 2.55%         | 2.2e+07 [0e+00-Inf]  | 0.992    | 1.000   |
| DPY19L2P1 | 101         | 0         | 0.00%         | 196          | 5         | 2.55%         | 2.2e+07 [0e+00-Inf]  | 0.992    | 1.000   |
| DPY19L2   | 101         | 2         | 1.98%         | 196          | 4         | 2.04%         | 1.03 [0.24-4.35]     | 0.972    | 1.000   |
| DPY19L4   | 101         | 16        | 15.84%        | 196          | 54        | 27.55%        | 2.02 [1.20-3.40]     | 2.60E-02 | 0.507   |
| DPYS      | 101         | 17        | 16.83%        | 196          | 50        | 25.51%        | 1.69 [1.01-2.83]     | 0.092    | 0.507   |
| DSCC1     | 101         | 15        | 14.85%        | 196          | 54        | 27.55%        | 2.18 [1.28-3.70]     | 1.56E-02 | 0.507   |
| DSG1      | 101         | 1         | 0.99%         | 196          | 4         | 2.04%         | 2.08 [0.33-13.25]    | 0.514    | 0.805   |
| DSG4      | 101         | 1         | 0.99%         | 196          | 4         | 2.04%         | 2.08 [0.33-13.25]    | 0.514    | 0.805   |
| DSN1      | 101         | 4         | 3.96%         | 196          | 6         | 3.06%         | 0.77 [0.26-2.26]     | 0.685    | 0.943   |
| DSTYK     | 101         | 7         | 6.93%         | 196          | 26        | 13.27%        | 2.05 [0.99-4.27]     | 0.106    | 0.507   |
| DTL       | 101         | 6         | 5.94%         | 196          | 20        | 10.20%        | 1.80 [0.81-3.98]     | 0.224    | 0.596   |
| DUPD1     | 101         | 2         | 1.98%         | 196          | 7         | 3.57%         | 1.83 [0.48-6.96]     | 0.455    | 0.805   |
| DUS1L     | 101         | 2         | 1.98%         | 196          | 14        | 7.14%         | 3.81 [1.08-13.43]    | 0.081    | 0.507   |
| DUSP10    | 101         | 6         | 5.94%         | 196          | 20        | 10.20%        | 1.80 [0.81-3.98]     | 0.224    | 0.596   |
| DUSP12    | 101         | 6         | 5.94%         | 196          | 15        | 7.65%         | 1.31 [0.58-2.98]     | 0.586    | 0.869   |
| DUSP13    | 101         | 2         | 1.98%         | 196          | 6         | 3.06%         | 1.56 [0.40-6.08]     | 0.589    | 0.869   |
| DUSP14    | 101         | 2         | 1.98%         | 196          | 7         | 3.57%         | 1.83 [0.48-6.96]     | 0.455    | 0.805   |
| DUSP23    | 101         | 6         | 5.94%         | 196          | 10        | 5.10%         | 0.85 [0.36-2.04]     | 0.762    | 0.996   |
| DUSP26    | 101         | 4         | 3.96%         | 196          | 12        | 6.12%         | 1.58 [0.60-4.18]     | 0.438    | 0.798   |
| DUSP27    | 101         | 5         | 4.95%         | 196          | 13        | 6.63%         | 1.36 [0.56-3.32]     | 0.566    | 0.852   |
| DUSP5P1   | 101         | 6         | 5.94%         | 196          | 21        | 10.71%        | 1.90 [0.86-4.19]     | 0.181    | 0.535   |
| DUSP6     | 101         | 0         | 0.00%         | 196          | 5         | 2.55%         | 2.2e+07 [0e+00-Inf]  | 0.992    | 1.000   |
| DVL3      | 101         | 3         | 2.97%         | 196          | 2         | 1.02%         | 0.34 [0.074-1.53]    | 0.237    | 0.599   |
| DYNLL2    | 101         | 6         | 5.94%         | 196          | 24        | 12.24%        | 2.21 [1.01-4.82]     | 0.095    | 0.507   |
| DYNLRB1   | 101         | 3         | 2.97%         | 196          | 4         | 2.04%         | 0.68 [0.19-2.43]     | 0.619    | 0.898   |
| DYRK2     | 101         | 3         | 2.97%         | 196          | 15        | 7.65%         | 2.71 [0.94-7.82]     | 0.122    | 0.534   |
| DYRK3     | 101         | 6         | 5.94%         | 196          | 25        | 12.76%        | 2.31 [1.06-5.03]     | 0.076    | 0.507   |
| PPP1R27   | 101         | 2         | 1.98%         | 196          | 13        | 6.63%         | 3.52 [0.99-12.47]    | 0.102    | 0.507   |
| E2F5      | 101         | 17        | 16.83%        | 196          | 47        | 23.98%        | 1.56 [0.93-2.61]     | 0.158    | 0.535   |
| E2F7      | 101         | 0         | 0.00%         | 196          | 8         | 4.08%         | 3.6e+07 [0e+00-Inf]  | 0.992    | 1.000   |
| E2F8      | 101         | 1         | 0.99%         | 196          | 5         | 2.55%         | 2.62 [0.43-16.05]    | 0.383    | 0.750   |
| E4F1      | 101         | 6         | 5.94%         | 196          | 4         | 2.04%         | 0.33 [0.11-0.97]     | 0.092    | 0.507   |
| EAPP      | 101         | 0         | 0.00%         | 196          | 7         | 3.57%         | 3.2e+07 [0e+00-Inf]  | 0.992    | 1.000   |
| EARS2     | 101         | 5         | 4.95%         | 196          | 2         | 1.02%         | 0.20 [0.049-0.80]    | 0.056    | 0.507   |
| EBAG9     | 101         | 15        | 14.85%        | 196          | 54        | 27.55%        | 2.18 [1.28-3.70]     | 1.56E-02 | 0.507   |
| ECD       | 101         | 1         | 0.99%         | 196          | 5         | 2.55%         | 2.62 [0.43-16.05]    | 0.383    | 0.750   |
| ECE2      | 101         | 3         | 2.97%         | 196          | 2         | 1.02%         | 0.34 [0.074-1.53]    | 0.237    | 0.599   |
| ECM1      | 101         | 9         | 8.91%         | 196          | 16        | 8.16%         | 0.91 [0.44-1.86]     | 0.826    | 1.000   |
| EDARADD   | 101         | 7         | 6.93%         | 196          | 19        | 9.69%         | 1.44 [0.68-3.07]     | 0.427    | 0.791   |
| EDEM2     | 101         | 4         | 3.96%         | 196          | 8         | 4.08%         | 1.03 [0.37-2.88]     | 0.960    | 1.000   |
| EDEM3     | 101         | 5         | 4.95%         | 196          | 19        | 9.69%         | 2.06 [0.88-4.83]     | 0.163    | 0.535   |
| EDN3      | 101         | 10        | 9.90%         | 196          | 15        | 7.65%         | 0.75 [0.37-1.52]     | 0.510    | 0.805   |
| EEA1      | 101         | 0         | 0.00%         | 196          | 5         | 2.55%         | 2.2e+07 [0e+00-Inf]  | 0.992    | 1.000   |
| EED       | 101         | 1         | 0.99%         | 196          | 4         | 2.04%         | 2.08 [0.33-13.25]    | 0.514    | 0.805   |
| EEF1A2    | 101         | 6         | 5.94%         | 196          | 14        | 7.14%         | 1.22 [0.53-2.79]     | 0.696    | 0.951   |
| EEF1D     | 101         | 16        | 15.84%        | 196          | 51        | 26.02%        | 1.87 [1.11-3.15]     | 4.89E-02 | 0.507   |
| EEF2K     | 101         | 5         | 4.95%         | 196          | 3         | 1.53%         | 0.30 [0.088-1.01]    | 0.103    | 0.507   |
| EFCAB1    | 101         | 14        | 13.86%        | 196          | 25        | 12.76%        | 0.91 [0.50-1.64]     | 0.789    | 0.996   |
| EFCAB2    | 101         | 5         | 4.95%         | 196          | 18        | 9.18%         | 1.94 [0.82-4.58]     | 0.203    | 0.570   |
| EFCAB3    | 101         | 9         | 8.91%         | 196          | 34        | 17.35%        | 2.15 [1.12-4.12]     | 0.055    | 0.507   |
| EFCAB5    | 101         | 2         | 1.98%         | 196          | 5         | 2.55%         | 1.30 [0.32-5.21]     | 0.759    | 0.996   |



| Symbol   | CINSARC Low |           |               | CINSARC High |           |               | CINSARC High vs. Low |          |         |
|----------|-------------|-----------|---------------|--------------|-----------|---------------|----------------------|----------|---------|
|          | N tested    | N altered | Fq alteration | N tested     | N altered | Fq alteration | OR [95%CI]           | p-value* | q-value |
| EFNA1    | 101         | 7         | 6.93%         | 196          | 13        | 6.63%         | 0.95 [0.43-2.12]     | 0.923    | 1.000   |
| EFNA3    | 101         | 7         | 6.93%         | 196          | 15        | 7.65%         | 1.11 [0.51-2.43]     | 0.822    | 1.000   |
| EFNA4    | 101         | 8         | 7.92%         | 196          | 15        | 7.65%         | 0.96 [0.46-2.04]     | 0.935    | 1.000   |
| EFR3A    | 101         | 15        | 14.85%        | 196          | 55        | 28.06%        | 2.24 [1.32-3.80]     | 1.24E-02 | 0.507   |
| EGLN1    | 101         | 6         | 5.94%         | 196          | 19        | 9.69%         | 1.70 [0.77-3.78]     | 0.274    | 0.643   |
| EGLN3    | 101         | 0         | 0.00%         | 196          | 9         | 4.59%         | 4.1e+07 [0e+00-Inf]  | 0.992    | 1.000   |
| EHHADH   | 101         | 3         | 2.97%         | 196          | 3         | 1.53%         | 0.51 [0.13-1.98]     | 0.412    | 0.774   |
| EIF1AD   | 101         | 0         | 0.00%         | 196          | 5         | 2.55%         | 2.2e+07 [0e+00-Inf]  | 0.992    | 1.000   |
| EIF1AY   | 101         | 0         | 0.00%         | 196          | 0         | 0.00%         | 1.00 [0e+00-Inf]     | 1.000    | 1.000   |
| EIF2B5   | 101         | 3         | 2.97%         | 196          | 2         | 1.02%         | 0.34 [0.074-1.53]    | 0.237    | 0.599   |
| AGO2     | 101         | 18        | 17.82%        | 196          | 51        | 26.02%        | 1.62 [0.98-2.69]     | 0.115    | 0.516   |
| EIF3CL   | 101         | 6         | 5.94%         | 196          | 3         | 1.53%         | 0.25 [0.076-0.80]    | 0.051    | 0.507   |
| EIF3C    | 101         | 6         | 5.94%         | 196          | 3         | 1.53%         | 0.25 [0.076-0.80]    | 0.051    | 0.507   |
| EIF3E    | 101         | 16        | 15.84%        | 196          | 50        | 25.51%        | 1.82 [1.08-3.07]     | 0.060    | 0.507   |
| EIF3H    | 101         | 16        | 15.84%        | 196          | 59        | 30.10%        | 2.29 [1.37-3.83]     | 8.37E-03 | 0.507   |
| EIF4A3   | 101         | 3         | 2.97%         | 196          | 15        | 7.65%         | 2.71 [0.94-7.82]     | 0.122    | 0.534   |
| EIF4EBP1 | 101         | 10        | 9.90%         | 196          | 50        | 25.51%        | 3.12 [1.69-5.74]     | 2.20E-03 | 0.507   |
| EIF4G1   | 101         | 3         | 2.97%         | 196          | 2         | 1.02%         | 0.34 [0.074-1.53]    | 0.237    | 0.599   |
| EIF6     | 101         | 4         | 3.96%         | 196          | 6         | 3.06%         | 0.77 [0.26-2.26]     | 0.685    | 0.943   |
| ELF3     | 101         | 8         | 7.92%         | 196          | 24        | 12.24%        | 1.62 [0.80-3.28]     | 0.258    | 0.635   |
| ELK4     | 101         | 7         | 6.93%         | 196          | 26        | 13.27%        | 2.05 [0.99-4.27]     | 0.106    | 0.507   |
| ELMO2    | 101         | 4         | 3.96%         | 196          | 7         | 3.57%         | 0.90 [0.31-2.57]     | 0.867    | 1.000   |
| EME1     | 101         | 4         | 3.96%         | 196          | 19        | 9.69%         | 2.60 [1.03-6.59]     | 0.090    | 0.507   |
| EME2     | 101         | 6         | 5.94%         | 196          | 5         | 2.55%         | 0.41 [0.15-1.15]     | 0.154    | 0.535   |
| EMILIN3  | 101         | 2         | 1.98%         | 196          | 4         | 2.04%         | 1.03 [0.24-4.35]     | 0.972    | 1.000   |
| EMP2     | 101         | 5         | 4.95%         | 196          | 4         | 2.04%         | 0.40 [0.13-1.23]     | 0.179    | 0.535   |
| ENAH     | 101         | 6         | 5.94%         | 196          | 17        | 8.67%         | 1.50 [0.67-3.38]     | 0.407    | 0.774   |
| ENGASE   | 101         | 3         | 2.97%         | 196          | 14        | 7.14%         | 2.51 [0.86-7.30]     | 0.155    | 0.535   |
| ENHO     | 101         | 1         | 0.99%         | 196          | 4         | 2.04%         | 2.08 [0.33-13.25]    | 0.514    | 0.805   |
| ENPP2    | 101         | 15        | 14.85%        | 196          | 56        | 28.57%        | 2.29 [1.35-3.89]     | 9.81E-03 | 0.507   |
| ENPP7    | 101         | 4         | 3.96%         | 196          | 17        | 8.67%         | 2.30 [0.90-5.88]     | 0.143    | 0.535   |
| ENSA     | 101         | 9         | 8.91%         | 196          | 17        | 8.67%         | 0.97 [0.48-1.97]     | 0.945    | 1.000   |
| ENY2     | 101         | 15        | 14.85%        | 196          | 54        | 27.55%        | 2.18 [1.28-3.70]     | 1.56E-02 | 0.507   |
| EPB41L1  | 101         | 4         | 3.96%         | 196          | 7         | 3.57%         | 0.90 [0.31-2.57]     | 0.867    | 1.000   |
| EPGN     | 101         | 2         | 1.98%         | 196          | 4         | 2.04%         | 1.03 [0.24-4.35]     | 0.972    | 1.000   |
| EPHB3    | 101         | 3         | 2.97%         | 196          | 3         | 1.53%         | 0.51 [0.13-1.98]     | 0.412    | 0.774   |
| EPHB6    | 101         | 2         | 1.98%         | 196          | 4         | 2.04%         | 1.03 [0.24-4.35]     | 0.972    | 1.000   |
| EPHX1    | 101         | 7         | 6.93%         | 196          | 20        | 10.20%        | 1.53 [0.72-3.24]     | 0.355    | 0.722   |
| EPN1     | 101         | 2         | 1.98%         | 196          | 4         | 2.04%         | 1.03 [0.24-4.35]     | 0.972    | 1.000   |
| EPN2     | 101         | 4         | 3.96%         | 196          | 1         | 0.51%         | 0.12 [0.02-0.79]     | 0.064    | 0.507   |
| EPN3     | 101         | 4         | 3.96%         | 196          | 19        | 9.69%         | 2.60 [1.03-6.59]     | 0.090    | 0.507   |
| EPPK1    | 101         | 17        | 16.83%        | 196          | 51        | 26.02%        | 1.74 [1.04-2.90]     | 0.076    | 0.507   |
| EPRS     | 101         | 6         | 5.94%         | 196          | 20        | 10.20%        | 1.80 [0.81-3.98]     | 0.224    | 0.596   |
| EPX      | 101         | 6         | 5.94%         | 196          | 26        | 13.27%        | 2.42 [1.12-5.25]     | 0.060    | 0.507   |
| ERAL1    | 101         | 3         | 2.97%         | 196          | 8         | 4.08%         | 1.39 [0.45-4.31]     | 0.632    | 0.909   |
| ERBB2    | 101         | 5         | 4.95%         | 196          | 13        | 6.63%         | 1.36 [0.56-3.32]     | 0.566    | 0.852   |
| ERCC4    | 101         | 6         | 5.94%         | 196          | 3         | 1.53%         | 0.25 [0.076-0.80]    | 0.051    | 0.507   |
| EREG     | 101         | 2         | 1.98%         | 196          | 4         | 2.04%         | 1.03 [0.24-4.35]     | 0.972    | 1.000   |
| ERL2     | 101         | 5         | 4.95%         | 196          | 2         | 1.02%         | 0.20 [0.049-0.80]    | 0.056    | 0.507   |
| ERLIN2   | 101         | 11        | 10.89%        | 196          | 53        | 27.04%        | 3.03 [1.68-5.46]     | 1.92E-03 | 0.507   |
| ERN1     | 101         | 8         | 7.92%         | 196          | 27        | 13.78%        | 1.86 [0.93-3.72]     | 0.143    | 0.535   |
| ERN2     | 101         | 5         | 4.95%         | 196          | 3         | 1.53%         | 0.30 [0.088-1.01]    | 0.103    | 0.507   |
| ESRP1    | 101         | 17        | 16.83%        | 196          | 54        | 27.55%        | 1.88 [1.13-3.13]     | 4.21E-02 | 0.507   |
| ESRRG    | 101         | 6         | 5.94%         | 196          | 21        | 10.71%        | 1.90 [0.86-4.19]     | 0.181    | 0.535   |
| ETNK2    | 101         | 7         | 6.93%         | 196          | 28        | 14.29%        | 2.24 [1.08-4.63]     | 0.068    | 0.507   |
| ETV3L    | 101         | 6         | 5.94%         | 196          | 8         | 4.08%         | 0.67 [0.27-1.68]     | 0.476    | 0.805   |
| ETV3     | 101         | 6         | 5.94%         | 196          | 8         | 4.08%         | 0.67 [0.27-1.68]     | 0.476    | 0.805   |
| EVPL     | 101         | 4         | 3.96%         | 196          | 12        | 6.12%         | 1.58 [0.60-4.18]     | 0.438    | 0.798   |
| EVX1     | 101         | 0         | 0.00%         | 196          | 6         | 3.06%         | 2.7e+07 [0e+00-Inf]  | 0.992    | 1.000   |
| EXO1     | 101         | 4         | 3.96%         | 196          | 19        | 9.69%         | 2.60 [1.03-6.59]     | 0.090    | 0.507   |
| EXOC7    | 101         | 4         | 3.96%         | 196          | 13        | 6.63%         | 1.72 [0.66-4.51]     | 0.353    | 0.722   |
| EXOC8    | 101         | 6         | 5.94%         | 196          | 19        | 9.69%         | 1.70 [0.77-3.78]     | 0.274    | 0.643   |
| EXOSC4   | 101         | 16        | 15.84%        | 196          | 51        | 26.02%        | 1.87 [1.11-3.15]     | 4.89E-02 | 0.507   |
| EXT1     | 101         | 15        | 14.85%        | 196          | 55        | 28.06%        | 2.24 [1.32-3.80]     | 1.24E-02 | 0.507   |
| EYA1     | 101         | 12        | 11.88%        | 196          | 34        | 17.35%        | 1.56 [0.86-2.82]     | 0.220    | 0.596   |
| EYA2     | 101         | 5         | 4.95%         | 196          | 7         | 3.57%         | 0.71 [0.27-1.90]     | 0.569    | 0.855   |
| F11R     | 101         | 6         | 5.94%         | 196          | 17        | 8.67%         | 1.50 [0.67-3.38]     | 0.407    | 0.774   |
| F13B     | 101         | 5         | 4.95%         | 196          | 21        | 10.71%        | 2.30 [0.99-5.36]     | 0.104    | 0.507   |
| F5       | 101         | 4         | 3.96%         | 196          | 13        | 6.63%         | 1.72 [0.66-4.51]     | 0.353    | 0.722   |
| FABP12   | 101         | 17        | 16.83%        | 196          | 47        | 23.98%        | 1.56 [0.93-2.61]     | 0.158    | 0.535   |
| FABP4    | 101         | 17        | 16.83%        | 196          | 47        | 23.98%        | 1.56 [0.93-2.61]     | 0.158    | 0.535   |

| Symbol    | CINSARC Low |           |               | CINSARC High |           |               | CINSARC High vs. Low |          |         |
|-----------|-------------|-----------|---------------|--------------|-----------|---------------|----------------------|----------|---------|
|           | N tested    | N altered | Fq alteration | N tested     | N altered | Fq alteration | OR [95%CI]           | p-value* | q-value |
| FABP5     | 101         | 17        | 16.83%        | 196          | 47        | 23.98%        | 1.56 [0.93-2.61]     | 0.158    | 0.535   |
| FABP9     | 101         | 17        | 16.83%        | 196          | 47        | 23.98%        | 1.56 [0.93-2.61]     | 0.158    | 0.535   |
| FADD      | 101         | 20        | 19.80%        | 196          | 56        | 28.57%        | 1.62 [1.00-2.63]     | 0.103    | 0.507   |
| FADS6     | 101         | 5         | 4.95%         | 196          | 13        | 6.63%         | 1.36 [0.56-3.32]     | 0.566    | 0.852   |
| FAHD1     | 101         | 6         | 5.94%         | 196          | 4         | 2.04%         | 0.33 [0.11-0.97]     | 0.092    | 0.507   |
| UBALD1    | 101         | 5         | 4.95%         | 196          | 6         | 3.06%         | 0.61 [0.22-1.68]     | 0.418    | 0.779   |
| UBALD2    | 101         | 3         | 2.97%         | 196          | 14        | 7.14%         | 2.51 [0.86-7.30]     | 0.155    | 0.535   |
| FAM104A   | 101         | 5         | 4.95%         | 196          | 17        | 8.67%         | 1.82 [0.77-4.32]     | 0.252    | 0.623   |
| FAM106A   | 101         | 6         | 5.94%         | 196          | 6         | 3.06%         | 0.50 [0.19-1.32]     | 0.241    | 0.608   |
| ABHD17C   | 101         | 2         | 1.98%         | 196          | 4         | 2.04%         | 1.03 [0.24-4.35]     | 0.972    | 1.000   |
| FAM110B   | 101         | 14        | 13.86%        | 196          | 33        | 16.84%        | 1.26 [0.71-2.22]     | 0.506    | 0.805   |
| FAM117A   | 101         | 4         | 3.96%         | 196          | 16        | 8.16%         | 2.16 [0.84-5.53]     | 0.180    | 0.535   |
| FAM126A   | 101         | 0         | 0.00%         | 196          | 6         | 3.06%         | 2.7e+07 [0e+00-Inf]  | 0.992    | 1.000   |
| FAM129A   | 101         | 5         | 4.95%         | 196          | 18        | 9.18%         | 1.94 [0.82-4.58]     | 0.203    | 0.570   |
| FAM131A   | 101         | 3         | 2.97%         | 196          | 2         | 1.02%         | 0.34 [0.074-1.53]    | 0.237    | 0.599   |
| FAM135B   | 101         | 15        | 14.85%        | 196          | 51        | 26.02%        | 2.02 [1.18-3.43]     | 3.03E-02 | 0.507   |
| FAM149B1  | 101         | 0         | 0.00%         | 196          | 5         | 2.55%         | 2.2e+07 [0e+00-Inf]  | 0.992    | 1.000   |
| FAM163A   | 101         | 6         | 5.94%         | 196          | 19        | 9.69%         | 1.70 [0.77-3.78]     | 0.274    | 0.643   |
| ZC2HC1A   | 101         | 15        | 14.85%        | 196          | 47        | 23.98%        | 1.81 [1.06-3.09]     | 0.069    | 0.507   |
| FAM168A   | 101         | 7         | 6.93%         | 196          | 13        | 6.63%         | 0.95 [0.43-2.12]     | 0.923    | 1.000   |
| FAM169B   | 101         | 1         | 0.99%         | 196          | 8         | 4.08%         | 4.26 [0.73-24.65]    | 0.175    | 0.535   |
| FAM173A   | 101         | 6         | 5.94%         | 196          | 4         | 2.04%         | 0.33 [0.11-0.97]     | 0.092    | 0.507   |
| FAM174B   | 101         | 0         | 0.00%         | 196          | 7         | 3.57%         | 3.2e+07 [0e+00-Inf]  | 0.992    | 1.000   |
| FAM177A1  | 101         | 0         | 0.00%         | 196          | 10        | 5.10%         | 4.6e+07 [0e+00-Inf]  | 0.992    | 1.000   |
| FAM177B   | 101         | 6         | 5.94%         | 196          | 20        | 10.20%        | 1.80 [0.81-3.98]     | 0.224    | 0.596   |
| FAM181B   | 101         | 2         | 1.98%         | 196          | 4         | 2.04%         | 1.03 [0.24-4.35]     | 0.972    | 1.000   |
| FAM189B   | 101         | 7         | 6.93%         | 196          | 14        | 7.14%         | 1.03 [0.47-2.28]     | 0.946    | 1.000   |
| TVP23A    | 101         | 5         | 4.95%         | 196          | 4         | 2.04%         | 0.40 [0.13-1.23]     | 0.179    | 0.535   |
| FAM197Y2  | 101         | 0         | 0.00%         | 196          | 0         | 0.00%         | 1.00 [0e+00-Inf]     | 1.000    | 1.000   |
| FAM20A    | 101         | 8         | 7.92%         | 196          | 24        | 12.24%        | 1.62 [0.80-3.28]     | 0.258    | 0.635   |
| FAM20B    | 101         | 5         | 4.95%         | 196          | 18        | 9.18%         | 1.94 [0.82-4.58]     | 0.203    | 0.570   |
| COX20     | 101         | 5         | 4.95%         | 196          | 18        | 9.18%         | 1.94 [0.82-4.58]     | 0.203    | 0.570   |
| FAM41AY1  | 101         | 0         | 0.00%         | 196          | 0         | 0.00%         | 1.00 [0e+00-Inf]     | 1.000    | 1.000   |
| FAM43A    | 101         | 3         | 2.97%         | 196          | 3         | 1.53%         | 0.51 [0.13-1.98]     | 0.412    | 0.774   |
| FAM47E    | 101         | 1         | 0.99%         | 196          | 5         | 2.55%         | 2.62 [0.43-16.05]    | 0.383    | 0.750   |
| FAM49B    | 101         | 16        | 15.84%        | 196          | 57        | 29.08%        | 2.18 [1.30-3.66]     | 1.33E-02 | 0.507   |
| FAM57B    | 101         | 5         | 4.95%         | 196          | 4         | 2.04%         | 0.40 [0.13-1.23]     | 0.179    | 0.535   |
| BRINP2    | 101         | 6         | 5.94%         | 196          | 17        | 8.67%         | 1.50 [0.67-3.38]     | 0.407    | 0.774   |
| BRINP3    | 101         | 6         | 5.94%         | 196          | 17        | 8.67%         | 1.50 [0.67-3.38]     | 0.407    | 0.774   |
| FAM66D    | 101         | 2         | 1.98%         | 196          | 4         | 2.04%         | 1.03 [0.24-4.35]     | 0.972    | 1.000   |
| FAM71A    | 101         | 6         | 5.94%         | 196          | 21        | 10.71%        | 1.90 [0.86-4.19]     | 0.181    | 0.535   |
| FAM71E2   | 101         | 1         | 0.99%         | 196          | 4         | 2.04%         | 2.08 [0.33-13.25]    | 0.514    | 0.805   |
| FAM72A    | 101         | 6         | 5.94%         | 196          | 24        | 12.24%        | 2.21 [1.01-4.82]     | 0.095    | 0.507   |
| SPATA31A6 | 101         | 0         | 0.00%         | 196          | 5         | 2.55%         | 2.2e+07 [0e+00-Inf]  | 0.992    | 1.000   |
| FAM78B    | 101         | 4         | 3.96%         | 196          | 12        | 6.12%         | 1.58 [0.60-4.18]     | 0.438    | 0.798   |
| RMDN1     | 101         | 18        | 17.82%        | 196          | 47        | 23.98%        | 1.45 [0.87-2.42]     | 0.226    | 0.598   |
| FAM83A    | 101         | 14        | 13.86%        | 196          | 57        | 29.08%        | 2.55 [1.49-4.37]     | 4.36E-03 | 0.507   |
| FAM83C    | 101         | 4         | 3.96%         | 196          | 6         | 3.06%         | 0.77 [0.26-2.26]     | 0.685    | 0.943   |
| FAM83D    | 101         | 2         | 1.98%         | 196          | 6         | 3.06%         | 1.56 [0.40-6.08]     | 0.589    | 0.869   |
| FAM83H    | 101         | 17        | 16.83%        | 196          | 50        | 25.51%        | 1.69 [1.01-2.83]     | 0.092    | 0.507   |
| FAM86C1   | 101         | 5         | 4.95%         | 196          | 10        | 5.10%         | 1.03 [0.41-2.60]     | 0.955    | 1.000   |
| FAM89A    | 101         | 6         | 5.94%         | 196          | 19        | 9.69%         | 1.70 [0.77-3.78]     | 0.274    | 0.643   |
| FAM91A1   | 101         | 14        | 13.86%        | 196          | 57        | 29.08%        | 2.55 [1.49-4.37]     | 4.36E-03 | 0.507   |
| FANCF     | 101         | 3         | 2.97%         | 196          | 2         | 1.02%         | 0.34 [0.074-1.53]    | 0.237    | 0.599   |
| FANCI     | 101         | 1         | 0.99%         | 196          | 6         | 3.06%         | 3.16 [0.53-18.88]    | 0.290    | 0.650   |
| FASLG     | 101         | 5         | 4.95%         | 196          | 15        | 7.65%         | 1.59 [0.66-3.81]     | 0.382    | 0.750   |
| FASN      | 101         | 2         | 1.98%         | 196          | 13        | 6.63%         | 3.52 [0.99-12.47]    | 0.102    | 0.507   |
| FBF1      | 101         | 4         | 3.96%         | 196          | 12        | 6.12%         | 1.58 [0.60-4.18]     | 0.438    | 0.798   |
| FBRS      | 101         | 4         | 3.96%         | 196          | 5         | 2.55%         | 0.63 [0.21-1.95]     | 0.505    | 0.805   |
| FBXL16    | 101         | 6         | 5.94%         | 196          | 4         | 2.04%         | 0.33 [0.11-0.97]     | 0.092    | 0.507   |
| FBXL19    | 101         | 4         | 3.96%         | 196          | 6         | 3.06%         | 0.77 [0.26-2.26]     | 0.685    | 0.943   |
| FBXL20    | 101         | 5         | 4.95%         | 196          | 12        | 6.12%         | 1.25 [0.51-3.08]     | 0.681    | 0.943   |
| FBXL6     | 101         | 18        | 17.82%        | 196          | 49        | 25.00%        | 1.54 [0.93-2.55]     | 0.163    | 0.535   |
| FBXO28    | 101         | 6         | 5.94%         | 196          | 17        | 8.67%         | 1.50 [0.67-3.38]     | 0.407    | 0.774   |
| FBXO32    | 101         | 14        | 13.86%        | 196          | 57        | 29.08%        | 2.55 [1.49-4.37]     | 4.36E-03 | 0.507   |
| FBXO3     | 101         | 1         | 0.99%         | 196          | 4         | 2.04%         | 2.08 [0.33-13.25]    | 0.514    | 0.805   |
| FBXO43    | 101         | 15        | 14.85%        | 196          | 54        | 27.55%        | 2.18 [1.28-3.70]     | 1.56E-02 | 0.507   |
| FBXO45    | 101         | 4         | 3.96%         | 196          | 4         | 2.04%         | 0.51 [0.16-1.65]     | 0.342    | 0.716   |
| FBXO47    | 101         | 4         | 3.96%         | 196          | 12        | 6.12%         | 1.58 [0.60-4.18]     | 0.438    | 0.798   |
| FCAMR     | 101         | 7         | 6.93%         | 196          | 25        | 12.76%        | 1.96 [0.94-4.09]     | 0.131    | 0.535   |
| FCER1A    | 101         | 6         | 5.94%         | 196          | 9         | 4.59%         | 0.76 [0.31-1.86]     | 0.616    | 0.898   |

| Symbol   | CINSARC Low |           |               | CINSARC High |           |               | CINSARC High vs. Low |          |         |
|----------|-------------|-----------|---------------|--------------|-----------|---------------|----------------------|----------|---------|
|          | N tested    | N altered | Fq alteration | N tested     | N altered | Fq alteration | OR [95%CI]           | p-value* | q-value |
| FCER1G   | 101         | 6         | 5.94%         | 196          | 16        | 8.16%         | 1.41 [0.62-3.18]     | 0.490    | 0.805   |
| FCGR1A   | 101         | 7         | 6.93%         | 196          | 12        | 6.12%         | 0.88 [0.39-1.97]     | 0.788    | 0.996   |
| FCGR2A   | 101         | 7         | 6.93%         | 196          | 18        | 9.18%         | 1.36 [0.63-2.91]     | 0.509    | 0.805   |
| FCGR2B   | 101         | 10        | 9.90%         | 196          | 19        | 9.69%         | 0.98 [0.50-1.92]     | 0.955    | 1.000   |
| FCGR2C   | 101         | 9         | 8.91%         | 196          | 22        | 11.22%        | 1.29 [0.65-2.56]     | 0.538    | 0.835   |
| FCGR3A   | 101         | 9         | 8.91%         | 196          | 20        | 10.20%        | 1.16 [0.58-2.32]     | 0.722    | 0.980   |
| FCGR3B   | 101         | 9         | 8.91%         | 196          | 22        | 11.22%        | 1.29 [0.65-2.56]     | 0.538    | 0.835   |
| FCHO1    | 101         | 2         | 1.98%         | 196          | 3         | 1.53%         | 0.77 [0.17-3.50]     | 0.776    | 0.996   |
| FCHSD2   | 101         | 6         | 5.94%         | 196          | 9         | 4.59%         | 0.76 [0.31-1.86]     | 0.616    | 0.898   |
| FCRL1    | 101         | 7         | 6.93%         | 196          | 9         | 4.59%         | 0.65 [0.27-1.52]     | 0.401    | 0.774   |
| FCRL2    | 101         | 7         | 6.93%         | 196          | 9         | 4.59%         | 0.65 [0.27-1.52]     | 0.401    | 0.774   |
| FCRL3    | 101         | 6         | 5.94%         | 196          | 8         | 4.08%         | 0.67 [0.27-1.68]     | 0.476    | 0.805   |
| FCRL4    | 101         | 6         | 5.94%         | 196          | 8         | 4.08%         | 0.67 [0.27-1.68]     | 0.476    | 0.805   |
| FCRL5    | 101         | 6         | 5.94%         | 196          | 8         | 4.08%         | 0.67 [0.27-1.68]     | 0.476    | 0.805   |
| FCRL6    | 101         | 6         | 5.94%         | 196          | 10        | 5.10%         | 0.85 [0.36-2.04]     | 0.762    | 0.996   |
| FCRLA    | 101         | 6         | 5.94%         | 196          | 15        | 7.65%         | 1.31 [0.58-2.98]     | 0.586    | 0.869   |
| FCRLB    | 101         | 6         | 5.94%         | 196          | 15        | 7.65%         | 1.31 [0.58-2.98]     | 0.586    | 0.869   |
| FDPS     | 101         | 7         | 6.93%         | 196          | 14        | 7.14%         | 1.03 [0.47-2.28]     | 0.946    | 1.000   |
| FDXR     | 101         | 5         | 4.95%         | 196          | 13        | 6.63%         | 1.36 [0.56-3.32]     | 0.566    | 0.852   |
| FER1L6   | 101         | 14        | 13.86%        | 196          | 57        | 29.08%        | 2.55 [1.49-4.37]     | 4.36E-03 | 0.507   |
| FES      | 101         | 1         | 0.99%         | 196          | 4         | 2.04%         | 2.08 [0.33-13.25]    | 0.514    | 0.805   |
| FGD5     | 101         | 0         | 0.00%         | 196          | 5         | 2.55%         | 2.2e+07 [0e+00-Inf]  | 0.992    | 1.000   |
| FGD6     | 101         | 0         | 0.00%         | 196          | 5         | 2.55%         | 2.2e+07 [0e+00-Inf]  | 0.992    | 1.000   |
| FGF12    | 101         | 3         | 2.97%         | 196          | 4         | 2.04%         | 0.68 [0.19-2.43]     | 0.619    | 0.898   |
| FGF19    | 101         | 23        | 22.77%        | 196          | 63        | 32.14%        | 1.61 [1.01-2.56]     | 0.093    | 0.507   |
| FGF3     | 101         | 24        | 23.76%        | 196          | 59        | 30.10%        | 1.38 [0.87-2.19]     | 0.250    | 0.623   |
| FGF4     | 101         | 24        | 23.76%        | 196          | 58        | 29.59%        | 1.35 [0.85-2.14]     | 0.288    | 0.650   |
| FGFR1    | 101         | 11        | 10.89%        | 196          | 43        | 21.94%        | 2.30 [1.27-4.18]     | 2.18E-02 | 0.507   |
| FH       | 101         | 4         | 3.96%         | 196          | 20        | 10.20%        | 2.76 [1.09-6.95]     | 0.071    | 0.507   |
| FITM2    | 101         | 3         | 2.97%         | 196          | 3         | 1.53%         | 0.51 [0.13-1.98]     | 0.412    | 0.774   |
| FIZ1     | 101         | 2         | 1.98%         | 196          | 4         | 2.04%         | 1.03 [0.24-4.35]     | 0.972    | 1.000   |
| FKBP14   | 101         | 0         | 0.00%         | 196          | 6         | 3.06%         | 2.7e+07 [0e+00-Inf]  | 0.992    | 1.000   |
| FKBP9    | 101         | 0         | 0.00%         | 196          | 8         | 4.08%         | 3.6e+07 [0e+00-Inf]  | 0.992    | 1.000   |
| FLAD1    | 101         | 8         | 7.92%         | 196          | 15        | 7.65%         | 0.96 [0.46-2.04]     | 0.935    | 1.000   |
| FLG2     | 101         | 7         | 6.93%         | 196          | 14        | 7.14%         | 1.03 [0.47-2.28]     | 0.946    | 1.000   |
| FLG      | 101         | 7         | 6.93%         | 196          | 14        | 7.14%         | 1.03 [0.47-2.28]     | 0.946    | 1.000   |
| FLJ16779 | 101         | 7         | 6.93%         | 196          | 13        | 6.63%         | 0.95 [0.43-2.12]     | 0.923    | 1.000   |
| FLJ42393 | 101         | 2         | 1.98%         | 196          | 3         | 1.53%         | 0.77 [0.17-3.50]     | 0.776    | 0.996   |
| FLJ42627 | 101         | 9         | 8.91%         | 196          | 5         | 2.55%         | 0.27 [0.10-0.69]     | 2.12E-02 | 0.507   |
| FLOT2    | 101         | 3         | 2.97%         | 196          | 8         | 4.08%         | 1.39 [0.45-4.31]     | 0.632    | 0.909   |
| FLT1     | 101         | 0         | 0.00%         | 196          | 5         | 2.55%         | 2.2e+07 [0e+00-Inf]  | 0.992    | 1.000   |
| FLVCR1   | 101         | 6         | 5.94%         | 196          | 21        | 10.71%        | 1.90 [0.86-4.19]     | 0.181    | 0.535   |
| FLYWCH1  | 101         | 6         | 5.94%         | 196          | 4         | 2.04%         | 0.33 [0.11-0.97]     | 0.092    | 0.507   |
| FLYWCH2  | 101         | 6         | 5.94%         | 196          | 5         | 2.55%         | 0.41 [0.15-1.15]     | 0.154    | 0.535   |
| FMN2     | 101         | 5         | 4.95%         | 196          | 15        | 7.65%         | 1.59 [0.66-3.81]     | 0.382    | 0.750   |
| FMO1     | 101         | 5         | 4.95%         | 196          | 13        | 6.63%         | 1.36 [0.56-3.32]     | 0.566    | 0.852   |
| FMO2     | 101         | 5         | 4.95%         | 196          | 13        | 6.63%         | 1.36 [0.56-3.32]     | 0.566    | 0.852   |
| FMO3     | 101         | 5         | 4.95%         | 196          | 13        | 6.63%         | 1.36 [0.56-3.32]     | 0.566    | 0.852   |
| FMO4     | 101         | 5         | 4.95%         | 196          | 13        | 6.63%         | 1.36 [0.56-3.32]     | 0.566    | 0.852   |
| FMO5     | 101         | 6         | 5.94%         | 196          | 12        | 6.12%         | 1.03 [0.44-2.41]     | 0.950    | 1.000   |
| FMO6P    | 101         | 5         | 4.95%         | 196          | 13        | 6.63%         | 1.36 [0.56-3.32]     | 0.566    | 0.852   |
| FMO9P    | 101         | 4         | 3.96%         | 196          | 11        | 5.61%         | 1.44 [0.54-3.85]     | 0.540    | 0.837   |
| FMOD     | 101         | 7         | 6.93%         | 196          | 28        | 14.29%        | 2.24 [1.08-4.63]     | 0.068    | 0.507   |
| FN3KRP   | 101         | 2         | 1.98%         | 196          | 15        | 7.65%         | 4.10 [1.17-14.39]    | 0.064    | 0.507   |
| FN3K     | 101         | 2         | 1.98%         | 196          | 15        | 7.65%         | 4.10 [1.17-14.39]    | 0.064    | 0.507   |
| FNDC8    | 101         | 1         | 0.99%         | 196          | 7         | 3.57%         | 3.70 [0.63-21.75]    | 0.224    | 0.596   |
| FNTA     | 101         | 13        | 12.87%        | 196          | 22        | 11.22%        | 0.86 [0.46-1.58]     | 0.677    | 0.943   |
| FOLR1    | 101         | 4         | 3.96%         | 196          | 8         | 4.08%         | 1.03 [0.37-2.88]     | 0.960    | 1.000   |
| FOLR2    | 101         | 5         | 4.95%         | 196          | 8         | 4.08%         | 0.82 [0.31-2.13]     | 0.729    | 0.986   |
| FOLR3    | 101         | 4         | 3.96%         | 196          | 7         | 3.57%         | 0.90 [0.31-2.57]     | 0.867    | 1.000   |
| FOXA1    | 101         | 0         | 0.00%         | 196          | 14        | 7.14%         | 6.6e+07 [0e+00-Inf]  | 0.992    | 1.000   |
| FOXH1    | 101         | 18        | 17.82%        | 196          | 49        | 25.00%        | 1.54 [0.93-2.55]     | 0.163    | 0.535   |
| FOXJ1    | 101         | 4         | 3.96%         | 196          | 13        | 6.63%         | 1.72 [0.66-4.51]     | 0.353    | 0.722   |
| FOXK2    | 101         | 2         | 1.98%         | 196          | 15        | 7.65%         | 4.10 [1.17-14.39]    | 0.064    | 0.507   |
| FOXN1    | 101         | 3         | 2.97%         | 196          | 8         | 4.08%         | 1.39 [0.45-4.31]     | 0.632    | 0.909   |
| FPR1     | 101         | 1         | 0.99%         | 196          | 4         | 2.04%         | 2.08 [0.33-13.25]    | 0.514    | 0.805   |
| FPR2     | 101         | 1         | 0.99%         | 196          | 4         | 2.04%         | 2.08 [0.33-13.25]    | 0.514    | 0.805   |
| FPR3     | 101         | 1         | 0.99%         | 196          | 4         | 2.04%         | 2.08 [0.33-13.25]    | 0.514    | 0.805   |
| FRS2     | 101         | 2         | 1.98%         | 196          | 17        | 8.67%         | 4.70 [1.35-16.35]    | 4.11E-02 | 0.507   |
| FSCN2    | 101         | 2         | 1.98%         | 196          | 12        | 6.12%         | 3.23 [0.90-11.53]    | 0.130    | 0.535   |
| FSD2     | 101         | 1         | 0.99%         | 196          | 4         | 2.04%         | 2.08 [0.33-13.25]    | 0.514    | 0.805   |

| Symbol    | CINSARC Low |           |               | CINSARC High |           |               | CINSARC High vs. Low |          |         |
|-----------|-------------|-----------|---------------|--------------|-----------|---------------|----------------------|----------|---------|
|           | N tested    | N altered | Fq alteration | N tested     | N altered | Fq alteration | OR [95%CI]           | p-value* | q-value |
| FTSJ3     | 101         | 8         | 7.92%         | 196          | 29        | 14.80%        | 2.02 [1.01-4.03]     | 0.094    | 0.507   |
| FURIN     | 101         | 1         | 0.99%         | 196          | 4         | 2.04%         | 2.08 [0.33-13.25]    | 0.514    | 0.805   |
| FUS       | 101         | 4         | 3.96%         | 196          | 5         | 2.55%         | 0.63 [0.21-1.95]     | 0.505    | 0.805   |
| FUT10     | 101         | 4         | 3.96%         | 196          | 10        | 5.10%         | 1.30 [0.48-3.53]     | 0.661    | 0.935   |
| FUT11     | 101         | 0         | 0.00%         | 196          | 5         | 2.55%         | 2.2e+07 [0e+00-Inf]  | 0.992    | 1.000   |
| FUT3      | 101         | 3         | 2.97%         | 196          | 2         | 1.02%         | 0.34 [0.074-1.53]    | 0.237    | 0.599   |
| FXR1      | 101         | 4         | 3.96%         | 196          | 2         | 1.02%         | 0.25 [0.059-1.05]    | 0.113    | 0.511   |
| FYTTD1    | 101         | 3         | 2.97%         | 196          | 4         | 2.04%         | 0.68 [0.19-2.43]     | 0.619    | 0.898   |
| FZD4      | 101         | 2         | 1.98%         | 196          | 5         | 2.55%         | 1.30 [0.32-5.21]     | 0.759    | 0.996   |
| FZD6      | 101         | 16        | 15.84%        | 196          | 56        | 28.57%        | 2.13 [1.27-3.57]     | 1.67E-02 | 0.507   |
| GOS2      | 101         | 6         | 5.94%         | 196          | 23        | 11.73%        | 2.11 [0.96-4.60]     | 0.118    | 0.526   |
| G2E3      | 101         | 1         | 0.99%         | 196          | 7         | 3.57%         | 3.70 [0.63-21.75]    | 0.224    | 0.596   |
| G3BP2     | 101         | 1         | 0.99%         | 196          | 5         | 2.55%         | 2.62 [0.43-16.05]    | 0.383    | 0.750   |
| GAA       | 101         | 3         | 2.97%         | 196          | 16        | 8.16%         | 2.90 [1.01-8.34]     | 0.097    | 0.507   |
| GAB2      | 101         | 8         | 7.92%         | 196          | 16        | 8.16%         | 1.03 [0.49-2.17]     | 0.942    | 1.000   |
| GABARAPL3 | 101         | 2         | 1.98%         | 196          | 6         | 3.06%         | 1.56 [0.40-6.08]     | 0.589    | 0.869   |
| GABPB2    | 101         | 7         | 6.93%         | 196          | 13        | 6.63%         | 0.95 [0.43-2.12]     | 0.923    | 1.000   |
| GAL3ST3   | 101         | 0         | 0.00%         | 196          | 5         | 2.55%         | 2.2e+07 [0e+00-Inf]  | 0.992    | 1.000   |
| GALK1     | 101         | 4         | 3.96%         | 196          | 12        | 6.12%         | 1.58 [0.60-4.18]     | 0.438    | 0.798   |
| GALNT2    | 101         | 6         | 5.94%         | 196          | 19        | 9.69%         | 1.70 [0.77-3.78]     | 0.274    | 0.643   |
| GALR2     | 101         | 4         | 3.96%         | 196          | 13        | 6.63%         | 1.72 [0.66-4.51]     | 0.353    | 0.722   |
| GALT      | 101         | 1         | 0.99%         | 196          | 4         | 2.04%         | 2.08 [0.33-13.25]    | 0.514    | 0.805   |
| GAL       | 101         | 10        | 9.90%         | 196          | 28        | 14.29%        | 1.52 [0.80-2.88]     | 0.286    | 0.650   |
| GARS      | 101         | 0         | 0.00%         | 196          | 7         | 3.57%         | 3.2e+07 [0e+00-Inf]  | 0.992    | 1.000   |
| GAS2L2    | 101         | 2         | 1.98%         | 196          | 4         | 2.04%         | 1.03 [0.24-4.35]     | 0.972    | 1.000   |
| GAS2      | 101         | 3         | 2.97%         | 196          | 2         | 1.02%         | 0.34 [0.074-1.53]    | 0.237    | 0.599   |
| GAS5      | 101         | 5         | 4.95%         | 196          | 13        | 6.63%         | 1.36 [0.56-3.32]     | 0.566    | 0.852   |
| GATA5     | 101         | 6         | 5.94%         | 196          | 11        | 5.61%         | 0.94 [0.40-2.23]     | 0.908    | 1.000   |
| GATAD2B   | 101         | 6         | 5.94%         | 196          | 11        | 5.61%         | 0.94 [0.40-2.23]     | 0.908    | 1.000   |
| GBAP1     | 101         | 9         | 8.91%         | 196          | 16        | 8.16%         | 0.91 [0.44-1.86]     | 0.826    | 1.000   |
| GBA       | 101         | 8         | 7.92%         | 196          | 13        | 6.63%         | 0.83 [0.38-1.78]     | 0.682    | 0.943   |
| GCGR      | 101         | 2         | 1.98%         | 196          | 13        | 6.63%         | 3.52 [0.99-12.47]    | 0.102    | 0.507   |
| GCK       | 101         | 0         | 0.00%         | 196          | 5         | 2.55%         | 2.2e+07 [0e+00-Inf]  | 0.992    | 1.000   |
| GCNT7     | 101         | 7         | 6.93%         | 196          | 13        | 6.63%         | 0.95 [0.43-2.12]     | 0.923    | 1.000   |
| GDAP1L1   | 101         | 3         | 2.97%         | 196          | 3         | 1.53%         | 0.51 [0.13-1.98]     | 0.412    | 0.774   |
| GDAP1     | 101         | 17        | 16.83%        | 196          | 42        | 21.43%        | 1.35 [0.80-2.27]     | 0.348    | 0.722   |
| GDE1      | 101         | 5         | 4.95%         | 196          | 4         | 2.04%         | 0.40 [0.13-1.23]     | 0.179    | 0.535   |
| GDF5      | 101         | 4         | 3.96%         | 196          | 8         | 4.08%         | 1.03 [0.37-2.88]     | 0.960    | 1.000   |
| GDF6      | 101         | 16        | 15.84%        | 196          | 53        | 27.04%        | 1.97 [1.17-3.31]     | 3.23E-02 | 0.507   |
| GDPD1     | 101         | 8         | 7.92%         | 196          | 30        | 15.31%        | 2.10 [1.06-4.18]     | 0.076    | 0.507   |
| GDPD3     | 101         | 5         | 4.95%         | 196          | 4         | 2.04%         | 0.40 [0.13-1.23]     | 0.179    | 0.535   |
| GDPD4     | 101         | 8         | 7.92%         | 196          | 20        | 10.20%        | 1.32 [0.64-2.71]     | 0.525    | 0.818   |
| GDPD5     | 101         | 4         | 3.96%         | 196          | 18        | 9.18%         | 2.45 [0.97-6.23]     | 0.114    | 0.512   |
| GEM       | 101         | 17        | 16.83%        | 196          | 52        | 26.53%        | 1.78 [1.07-2.98]     | 0.063    | 0.507   |
| GFER      | 101         | 6         | 5.94%         | 196          | 5         | 2.55%         | 0.41 [0.15-1.15]     | 0.154    | 0.535   |
| GGA2      | 101         | 5         | 4.95%         | 196          | 2         | 1.02%         | 0.20 [0.049-0.80]    | 0.056    | 0.507   |
| GGA3      | 101         | 5         | 4.95%         | 196          | 13        | 6.63%         | 1.36 [0.56-3.32]     | 0.566    | 0.852   |
| GGCT      | 101         | 0         | 0.00%         | 196          | 7         | 3.57%         | 3.2e+07 [0e+00-Inf]  | 0.992    | 1.000   |
| GGH       | 101         | 16        | 15.84%        | 196          | 33        | 16.84%        | 1.08 [0.62-1.86]     | 0.827    | 1.000   |
| GGNBP2    | 101         | 2         | 1.98%         | 196          | 5         | 2.55%         | 1.30 [0.32-5.21]     | 0.759    | 0.996   |
| GGPS1     | 101         | 7         | 6.93%         | 196          | 20        | 10.20%        | 1.53 [0.72-3.24]     | 0.355    | 0.722   |
| GGT7      | 101         | 4         | 3.96%         | 196          | 6         | 3.06%         | 0.77 [0.26-2.26]     | 0.685    | 0.943   |
| GH1       | 101         | 8         | 7.92%         | 196          | 29        | 14.80%        | 2.02 [1.01-4.03]     | 0.094    | 0.507   |
| GH2       | 101         | 8         | 7.92%         | 196          | 29        | 14.80%        | 2.02 [1.01-4.03]     | 0.094    | 0.507   |
| GHRHR     | 101         | 0         | 0.00%         | 196          | 7         | 3.57%         | 3.2e+07 [0e+00-Inf]  | 0.992    | 1.000   |
| GHRH      | 101         | 5         | 4.95%         | 196          | 3         | 1.53%         | 0.30 [0.088-1.01]    | 0.103    | 0.507   |
| GINS4     | 101         | 15        | 14.85%        | 196          | 31        | 15.82%        | 1.08 [0.61-1.89]     | 0.828    | 1.000   |
| GIP       | 101         | 3         | 2.97%         | 196          | 17        | 8.67%         | 3.10 [1.09-8.87]     | 0.076    | 0.507   |
| GIT1      | 101         | 3         | 2.97%         | 196          | 5         | 2.55%         | 0.86 [0.25-2.89]     | 0.833    | 1.000   |
| SLX1B     | 101         | 4         | 3.96%         | 196          | 3         | 1.53%         | 0.38 [0.11-1.35]     | 0.207    | 0.573   |
| GJA5      | 101         | 6         | 5.94%         | 196          | 12        | 6.12%         | 1.03 [0.44-2.41]     | 0.950    | 1.000   |
| GJA8      | 101         | 6         | 5.94%         | 196          | 12        | 6.12%         | 1.03 [0.44-2.41]     | 0.950    | 1.000   |
| GJC2      | 101         | 6         | 5.94%         | 196          | 21        | 10.71%        | 1.90 [0.86-4.19]     | 0.181    | 0.535   |
| GJD3      | 101         | 4         | 3.96%         | 196          | 6         | 3.06%         | 0.77 [0.26-2.26]     | 0.685    | 0.943   |
| GLI4      | 101         | 17        | 16.83%        | 196          | 51        | 26.02%        | 1.74 [1.04-2.90]     | 0.076    | 0.507   |
| GLIPR1L1  | 101         | 2         | 1.98%         | 196          | 6         | 3.06%         | 1.56 [0.40-6.08]     | 0.589    | 0.869   |
| GLIPR1L2  | 101         | 2         | 1.98%         | 196          | 5         | 2.55%         | 1.30 [0.32-5.21]     | 0.759    | 0.996   |
| GLIPR1    | 101         | 2         | 1.98%         | 196          | 5         | 2.55%         | 1.30 [0.32-5.21]     | 0.759    | 0.996   |
| GLIS2     | 101         | 5         | 4.95%         | 196          | 6         | 3.06%         | 0.61 [0.22-1.68]     | 0.418    | 0.779   |
| GLRX2     | 101         | 5         | 4.95%         | 196          | 19        | 9.69%         | 2.06 [0.88-4.83]     | 0.163    | 0.535   |
| COLGALT2  | 101         | 5         | 4.95%         | 196          | 20        | 10.20%        | 2.18 [0.93-5.10]     | 0.130    | 0.535   |

| Symbol    | CINSARC Low |           |               | CINSARC High |           |               | CINSARC High vs. Low |          |         |
|-----------|-------------|-----------|---------------|--------------|-----------|---------------|----------------------|----------|---------|
|           | N tested    | N altered | Fq alteration | N tested     | N altered | Fq alteration | OR [95%CI]           | p-value* | q-value |
| GLUL      | 101         | 5         | 4.95%         | 196          | 19        | 9.69%         | 2.06 [0.88-4.83]     | 0.163    | 0.535   |
| GLYR1     | 101         | 5         | 4.95%         | 196          | 5         | 2.55%         | 0.50 [0.17-1.45]     | 0.286    | 0.650   |
| GMEB2     | 101         | 6         | 5.94%         | 196          | 16        | 8.16%         | 1.41 [0.62-3.18]     | 0.490    | 0.805   |
| GML       | 101         | 16        | 15.84%        | 196          | 49        | 25.00%        | 1.77 [1.05-2.99]     | 0.073    | 0.507   |
| GNA13     | 101         | 8         | 7.92%         | 196          | 23        | 11.73%        | 1.55 [0.76-3.14]     | 0.311    | 0.680   |
| GNAS-AS1  | 101         | 9         | 8.91%         | 196          | 14        | 7.14%         | 0.79 [0.38-1.64]     | 0.590    | 0.870   |
| GNAS      | 101         | 9         | 8.91%         | 196          | 15        | 7.65%         | 0.85 [0.41-1.75]     | 0.707    | 0.962   |
| GNB4      | 101         | 4         | 3.96%         | 196          | 2         | 1.02%         | 0.25 [0.059-1.05]    | 0.113    | 0.511   |
| GNG13     | 101         | 6         | 5.94%         | 196          | 4         | 2.04%         | 0.33 [0.11-0.97]     | 0.092    | 0.507   |
| GNG4      | 101         | 7         | 6.93%         | 196          | 20        | 10.20%        | 1.53 [0.72-3.24]     | 0.355    | 0.722   |
| GNGT2     | 101         | 4         | 3.96%         | 196          | 17        | 8.67%         | 2.30 [0.90-5.88]     | 0.143    | 0.535   |
| GNPAT     | 101         | 6         | 5.94%         | 196          | 19        | 9.69%         | 1.70 [0.77-3.78]     | 0.274    | 0.643   |
| GNPTG     | 101         | 6         | 5.94%         | 196          | 5         | 2.55%         | 0.41 [0.15-1.15]     | 0.154    | 0.535   |
| GNRHR2    | 101         | 5         | 4.95%         | 196          | 10        | 5.10%         | 1.03 [0.41-2.60]     | 0.955    | 1.000   |
| GNS       | 101         | 3         | 2.97%         | 196          | 6         | 3.06%         | 1.03 [0.32-3.36]     | 0.965    | 1.000   |
| GOLGA2P3Y | 101         | 0         | 0.00%         | 196          | 0         | 0.00%         | 1.00 [0e+00-Inf]     | 1.000    | 1.000   |
| GOLGA6L5P | 101         | 2         | 1.98%         | 196          | 4         | 2.04%         | 1.03 [0.24-4.35]     | 0.972    | 1.000   |
| GOLGA6L6  | 101         | 3         | 2.97%         | 196          | 4         | 2.04%         | 0.68 [0.19-2.43]     | 0.619    | 0.898   |
| GOLGA7    | 101         | 13        | 12.87%        | 196          | 31        | 15.82%        | 1.27 [0.71-2.28]     | 0.499    | 0.805   |
| GOLGA8CP  | 101         | 3         | 2.97%         | 196          | 4         | 2.04%         | 0.68 [0.19-2.43]     | 0.619    | 0.898   |
| GOLPH3L   | 101         | 9         | 8.91%         | 196          | 17        | 8.67%         | 0.97 [0.48-1.97]     | 0.945    | 1.000   |
| GOLT1A    | 101         | 7         | 6.93%         | 196          | 28        | 14.29%        | 2.24 [1.08-4.63]     | 0.068    | 0.507   |
| GON4L     | 101         | 7         | 6.93%         | 196          | 9         | 4.59%         | 0.65 [0.27-1.52]     | 0.401    | 0.774   |
| GORAB     | 101         | 4         | 3.96%         | 196          | 13        | 6.63%         | 1.72 [0.66-4.51]     | 0.353    | 0.722   |
| GOSR1     | 101         | 2         | 1.98%         | 196          | 3         | 1.53%         | 0.77 [0.17-3.50]     | 0.776    | 0.996   |
| GOSR2     | 101         | 1         | 0.99%         | 196          | 5         | 2.55%         | 2.62 [0.43-16.05]    | 0.383    | 0.750   |
| GOT1L1    | 101         | 10        | 9.90%         | 196          | 51        | 26.02%        | 3.20 [1.74-5.89]     | 1.70E-03 | 0.507   |
| GP2       | 101         | 5         | 4.95%         | 196          | 3         | 1.53%         | 0.30 [0.088-1.01]    | 0.103    | 0.507   |
| GP5       | 101         | 3         | 2.97%         | 196          | 3         | 1.53%         | 0.51 [0.13-1.98]     | 0.412    | 0.774   |
| GPA33     | 101         | 5         | 4.95%         | 196          | 13        | 6.63%         | 1.36 [0.56-3.32]     | 0.566    | 0.852   |
| GPAA1     | 101         | 17        | 16.83%        | 196          | 51        | 26.02%        | 1.74 [1.04-2.90]     | 0.076    | 0.507   |
| GPATCH2   | 101         | 6         | 5.94%         | 196          | 20        | 10.20%        | 1.80 [0.81-3.98]     | 0.224    | 0.596   |
| GPATCH4   | 101         | 6         | 5.94%         | 196          | 8         | 4.08%         | 0.67 [0.27-1.68]     | 0.476    | 0.805   |
| GPIHBP1   | 101         | 16        | 15.84%        | 196          | 48        | 24.49%        | 1.72 [1.02-2.91]     | 0.088    | 0.507   |
| GNMB      | 101         | 0         | 0.00%         | 196          | 6         | 3.06%         | 2.7e+07 [0e+00-Inf]  | 0.992    | 1.000   |
| GPR137B   | 101         | 7         | 6.93%         | 196          | 20        | 10.20%        | 1.53 [0.72-3.24]     | 0.355    | 0.722   |
| GPR139    | 101         | 5         | 4.95%         | 196          | 3         | 1.53%         | 0.30 [0.088-1.01]    | 0.103    | 0.507   |
| GPR142    | 101         | 7         | 6.93%         | 196          | 14        | 7.14%         | 1.03 [0.47-2.28]     | 0.946    | 1.000   |
| GPR152    | 101         | 11        | 10.89%        | 196          | 20        | 10.20%        | 0.93 [0.48-1.79]     | 0.854    | 1.000   |
| GPR161    | 101         | 4         | 3.96%         | 196          | 12        | 6.12%         | 1.58 [0.60-4.18]     | 0.438    | 0.798   |
| GPR171    | 101         | 3         | 2.97%         | 196          | 2         | 1.02%         | 0.34 [0.074-1.53]    | 0.237    | 0.599   |
| SLC52A2   | 101         | 18        | 17.82%        | 196          | 49        | 25.00%        | 1.54 [0.93-2.55]     | 0.163    | 0.535   |
| GPR179    | 101         | 5         | 4.95%         | 196          | 8         | 4.08%         | 0.82 [0.31-2.13]     | 0.729    | 0.986   |
| GPR20     | 101         | 18        | 17.82%        | 196          | 50        | 25.51%        | 1.58 [0.95-2.62]     | 0.137    | 0.535   |
| GPR25     | 101         | 7         | 6.93%         | 196          | 24        | 12.24%        | 1.87 [0.90-3.92]     | 0.161    | 0.535   |
| GPR37L1   | 101         | 8         | 7.92%         | 196          | 24        | 12.24%        | 1.62 [0.80-3.28]     | 0.258    | 0.635   |
| GPR52     | 101         | 5         | 4.95%         | 196          | 14        | 7.14%         | 1.48 [0.61-3.57]     | 0.467    | 0.805   |
| GPR87     | 101         | 3         | 2.97%         | 196          | 2         | 1.02%         | 0.34 [0.074-1.53]    | 0.237    | 0.599   |
| GPR89A    | 101         | 5         | 4.95%         | 196          | 10        | 5.10%         | 1.03 [0.41-2.60]     | 0.955    | 1.000   |
| GPR89B    | 101         | 6         | 5.94%         | 196          | 12        | 6.12%         | 1.03 [0.44-2.41]     | 0.950    | 1.000   |
| GPRCSB    | 101         | 5         | 4.95%         | 196          | 3         | 1.53%         | 0.30 [0.088-1.01]    | 0.103    | 0.507   |
| GPRC5C    | 101         | 7         | 6.93%         | 196          | 13        | 6.63%         | 0.95 [0.43-2.12]     | 0.923    | 1.000   |
| GPS1      | 101         | 2         | 1.98%         | 196          | 14        | 7.14%         | 3.81 [1.08-13.43]    | 0.081    | 0.507   |
| GPT2      | 101         | 1         | 0.99%         | 196          | 4         | 2.04%         | 2.08 [0.33-13.25]    | 0.514    | 0.805   |
| GPT       | 101         | 17        | 16.83%        | 196          | 49        | 25.00%        | 1.65 [0.98-2.76]     | 0.111    | 0.511   |
| GRAPL     | 101         | 5         | 4.95%         | 196          | 1         | 0.51%         | 0.098 [0.016-0.60]   | 3.55E-02 | 0.507   |
| GRB2      | 101         | 5         | 4.95%         | 196          | 11        | 5.61%         | 1.14 [0.46-2.84]     | 0.811    | 1.000   |
| GRB7      | 101         | 6         | 5.94%         | 196          | 12        | 6.12%         | 1.03 [0.44-2.41]     | 0.950    | 1.000   |
| GREM2     | 101         | 5         | 4.95%         | 196          | 19        | 9.69%         | 2.06 [0.88-4.83]     | 0.163    | 0.535   |
| GRHL2     | 101         | 18        | 17.82%        | 196          | 55        | 28.06%        | 1.80 [1.09-2.97]     | 0.054    | 0.507   |
| GRIN2A    | 101         | 5         | 4.95%         | 196          | 4         | 2.04%         | 0.40 [0.13-1.23]     | 0.179    | 0.535   |
| GRIN2C    | 101         | 5         | 4.95%         | 196          | 13        | 6.63%         | 1.36 [0.56-3.32]     | 0.566    | 0.852   |
| GRINA     | 101         | 17        | 16.83%        | 196          | 51        | 26.02%        | 1.74 [1.04-2.90]     | 0.076    | 0.507   |
| GRIP1     | 101         | 2         | 1.98%         | 196          | 10        | 5.10%         | 2.66 [0.73-9.67]     | 0.212    | 0.586   |
| GRM5      | 101         | 1         | 0.99%         | 196          | 4         | 2.04%         | 2.08 [0.33-13.25]    | 0.514    | 0.805   |
| GRP       | 101         | 1         | 0.99%         | 196          | 4         | 2.04%         | 2.08 [0.33-13.25]    | 0.514    | 0.805   |
| GSDMA     | 101         | 5         | 4.95%         | 196          | 10        | 5.10%         | 1.03 [0.41-2.60]     | 0.955    | 1.000   |
| GSDMB     | 101         | 5         | 4.95%         | 196          | 12        | 6.12%         | 1.25 [0.51-3.08]     | 0.681    | 0.943   |
| GSDMC     | 101         | 15        | 14.85%        | 196          | 57        | 29.08%        | 2.35 [1.39-3.99]     | 7.74E-03 | 0.507   |
| GSDMD     | 101         | 17        | 16.83%        | 196          | 51        | 26.02%        | 1.74 [1.04-2.90]     | 0.076    | 0.507   |
| GSG1L     | 101         | 5         | 4.95%         | 196          | 4         | 2.04%         | 0.40 [0.13-1.23]     | 0.179    | 0.535   |

| Symbol     | CINSARC Low |           |               | CINSARC High |           |               | CINSARC High vs. Low |          |         |
|------------|-------------|-----------|---------------|--------------|-----------|---------------|----------------------|----------|---------|
|            | N tested    | N altered | Fq alteration | N tested     | N altered | Fq alteration | OR [95%CI]           | p-value* | q-value |
| GSPT1      | 101         | 5         | 4.95%         | 196          | 3         | 1.53%         | 0.30 [0.088-1.01]    | 0.103    | 0.507   |
| GSR        | 101         | 2         | 1.98%         | 196          | 6         | 3.06%         | 1.56 [0.40-6.08]     | 0.589    | 0.869   |
| GSS        | 101         | 4         | 3.96%         | 196          | 8         | 4.08%         | 1.03 [0.37-2.88]     | 0.960    | 1.000   |
| GSTM1      | 101         | 20        | 19.80%        | 196          | 32        | 16.33%        | 0.79 [0.47-1.33]     | 0.456    | 0.805   |
| GSTM2      | 101         | 5         | 4.95%         | 196          | 1         | 0.51%         | 0.098 [0.016-0.60]   | 3.55E-02 | 0.507   |
| GSTP1      | 101         | 9         | 8.91%         | 196          | 20        | 10.20%        | 1.16 [0.58-2.32]     | 0.722    | 0.980   |
| GSTT1      | 101         | 4         | 3.96%         | 196          | 8         | 4.08%         | 1.03 [0.37-2.88]     | 0.960    | 1.000   |
| GTF2E2     | 101         | 2         | 1.98%         | 196          | 5         | 2.55%         | 1.30 [0.32-5.21]     | 0.759    | 0.996   |
| GTF2H2     | 101         | 5         | 4.95%         | 196          | 6         | 3.06%         | 0.61 [0.22-1.68]     | 0.418    | 0.779   |
| GTF3C1     | 101         | 5         | 4.95%         | 196          | 3         | 1.53%         | 0.30 [0.088-1.01]    | 0.103    | 0.507   |
| MTG2       | 101         | 7         | 6.93%         | 196          | 12        | 6.12%         | 0.88 [0.39-1.97]     | 0.788    | 0.996   |
| GTSF1L     | 101         | 2         | 1.98%         | 196          | 4         | 2.04%         | 1.03 [0.24-4.35]     | 0.972    | 1.000   |
| GUCY2EP    | 101         | 6         | 5.94%         | 196          | 17        | 8.67%         | 1.50 [0.67-3.38]     | 0.407    | 0.774   |
| GUK1       | 101         | 6         | 5.94%         | 196          | 21        | 10.71%        | 1.90 [0.86-4.19]     | 0.181    | 0.535   |
| H3F3A      | 101         | 6         | 5.94%         | 196          | 19        | 9.69%         | 1.70 [0.77-3.78]     | 0.274    | 0.643   |
| H3F3B      | 101         | 4         | 3.96%         | 196          | 12        | 6.12%         | 1.58 [0.60-4.18]     | 0.438    | 0.798   |
| HACE1      | 101         | 0         | 0.00%         | 196          | 5         | 2.55%         | 2.2e+07 [0e+00-Inf]  | 0.992    | 1.000   |
| HAGHL      | 101         | 6         | 5.94%         | 196          | 4         | 2.04%         | 0.33 [0.11-0.97]     | 0.092    | 0.507   |
| HAGH       | 101         | 6         | 5.94%         | 196          | 4         | 2.04%         | 0.33 [0.11-0.97]     | 0.092    | 0.507   |
| HAPLN2     | 101         | 6         | 5.94%         | 196          | 8         | 4.08%         | 0.67 [0.27-1.68]     | 0.476    | 0.805   |
| HAPLN3     | 101         | 1         | 0.99%         | 196          | 5         | 2.55%         | 2.62 [0.43-16.05]    | 0.383    | 0.750   |
| HAR1A      | 101         | 8         | 7.92%         | 196          | 13        | 6.63%         | 0.83 [0.38-1.78]     | 0.682    | 0.943   |
| HAR1B      | 101         | 8         | 7.92%         | 196          | 13        | 6.63%         | 0.83 [0.38-1.78]     | 0.682    | 0.943   |
| HAS1       | 101         | 1         | 0.99%         | 196          | 4         | 2.04%         | 2.08 [0.33-13.25]    | 0.514    | 0.805   |
| HAS2-AS1   | 101         | 15        | 14.85%        | 196          | 53        | 27.04%        | 2.12 [1.25-3.61]     | 1.95E-02 | 0.507   |
| HAS2       | 101         | 15        | 14.85%        | 196          | 54        | 27.55%        | 2.18 [1.28-3.70]     | 1.56E-02 | 0.507   |
| HAX1       | 101         | 7         | 6.93%         | 196          | 12        | 6.12%         | 0.88 [0.39-1.97]     | 0.788    | 0.996   |
| HBA1       | 101         | 7         | 6.93%         | 196          | 4         | 2.04%         | 0.28 [0.098-0.80]    | 4.63E-02 | 0.507   |
| HBA2       | 101         | 7         | 6.93%         | 196          | 4         | 2.04%         | 0.28 [0.098-0.80]    | 4.63E-02 | 0.507   |
| HBM        | 101         | 7         | 6.93%         | 196          | 4         | 2.04%         | 0.28 [0.098-0.80]    | 4.63E-02 | 0.507   |
| HBQ1       | 101         | 7         | 6.93%         | 196          | 4         | 2.04%         | 0.28 [0.098-0.80]    | 4.63E-02 | 0.507   |
| HBZ        | 101         | 7         | 6.93%         | 196          | 4         | 2.04%         | 0.28 [0.098-0.80]    | 4.63E-02 | 0.507   |
| HCFC1R1    | 101         | 6         | 5.94%         | 196          | 4         | 2.04%         | 0.33 [0.11-0.97]     | 0.092    | 0.507   |
| HCN3       | 101         | 7         | 6.93%         | 196          | 14        | 7.14%         | 1.03 [0.47-2.28]     | 0.946    | 1.000   |
| HDDC3      | 101         | 1         | 0.99%         | 196          | 4         | 2.04%         | 2.08 [0.33-13.25]    | 0.514    | 0.805   |
| HDGF       | 101         | 7         | 6.93%         | 196          | 8         | 4.08%         | 0.57 [0.24-1.37]     | 0.294    | 0.650   |
| HEATR1     | 101         | 7         | 6.93%         | 196          | 19        | 9.69%         | 1.44 [0.68-3.07]     | 0.427    | 0.791   |
| HEATR4     | 101         | 3         | 2.97%         | 196          | 7         | 3.57%         | 1.21 [0.38-3.83]     | 0.786    | 0.996   |
| HEATR5A    | 101         | 1         | 0.99%         | 196          | 9         | 4.59%         | 4.81 [0.84-27.58]    | 0.139    | 0.535   |
| HEATR6     | 101         | 7         | 6.93%         | 196          | 33        | 16.84%        | 2.72 [1.33-5.57]     | 2.17E-02 | 0.507   |
| MROH1      | 101         | 18        | 17.82%        | 196          | 50        | 25.51%        | 1.58 [0.95-2.62]     | 0.137    | 0.535   |
| HECTD1     | 101         | 0         | 0.00%         | 196          | 7         | 3.57%         | 3.2e+07 [0e+00-Inf]  | 0.992    | 1.000   |
| HELB       | 101         | 2         | 1.98%         | 196          | 9         | 4.59%         | 2.38 [0.65-8.76]     | 0.273    | 0.643   |
| HELZ       | 101         | 10        | 9.90%         | 196          | 29        | 14.80%        | 1.58 [0.83-3.00]     | 0.240    | 0.606   |
| HERC2P4    | 101         | 4         | 3.96%         | 196          | 3         | 1.53%         | 0.38 [0.11-1.35]     | 0.207    | 0.573   |
| HES1       | 101         | 3         | 2.97%         | 196          | 3         | 1.53%         | 0.51 [0.13-1.98]     | 0.412    | 0.774   |
| HEXA       | 101         | 1         | 0.99%         | 196          | 4         | 2.04%         | 2.08 [0.33-13.25]    | 0.514    | 0.805   |
| HEY1       | 101         | 17        | 16.83%        | 196          | 46        | 23.47%        | 1.52 [0.90-2.54]     | 0.187    | 0.551   |
| HGSNAT     | 101         | 12        | 11.88%        | 196          | 24        | 12.24%        | 1.03 [0.56-1.92]     | 0.928    | 1.000   |
| HGS        | 101         | 2         | 1.98%         | 196          | 12        | 6.12%         | 3.23 [0.90-11.53]    | 0.130    | 0.535   |
| HHAT       | 101         | 6         | 5.94%         | 196          | 20        | 10.20%        | 1.80 [0.81-3.98]     | 0.224    | 0.596   |
| HHIPL2     | 101         | 6         | 5.94%         | 196          | 18        | 9.18%         | 1.60 [0.72-3.57]     | 0.335    | 0.716   |
| HHLA1      | 101         | 15        | 14.85%        | 196          | 55        | 28.06%        | 2.24 [1.32-3.80]     | 1.24E-02 | 0.507   |
| HIBADH     | 101         | 0         | 0.00%         | 196          | 7         | 3.57%         | 3.2e+07 [0e+00-Inf]  | 0.992    | 1.000   |
| HILS1      | 101         | 5         | 4.95%         | 196          | 17        | 8.67%         | 1.82 [0.77-4.32]     | 0.252    | 0.623   |
| HIRIP3     | 101         | 5         | 4.95%         | 196          | 4         | 2.04%         | 0.40 [0.13-1.23]     | 0.179    | 0.535   |
| HIST2H2AA3 | 101         | 8         | 7.92%         | 196          | 14        | 7.14%         | 0.89 [0.42-1.91]     | 0.808    | 1.000   |
| HIST2H2AB  | 101         | 6         | 5.94%         | 196          | 14        | 7.14%         | 1.22 [0.53-2.79]     | 0.696    | 0.951   |
| HIST2H2AC  | 101         | 6         | 5.94%         | 196          | 14        | 7.14%         | 1.22 [0.53-2.79]     | 0.696    | 0.951   |
| HIST2H2BE  | 101         | 6         | 5.94%         | 196          | 14        | 7.14%         | 1.22 [0.53-2.79]     | 0.696    | 0.951   |
| HIST2H2BF  | 101         | 7         | 6.93%         | 196          | 12        | 6.12%         | 0.88 [0.39-1.97]     | 0.788    | 0.996   |
| HIST2H3C   | 101         | 6         | 5.94%         | 196          | 14        | 7.14%         | 1.22 [0.53-2.79]     | 0.696    | 0.951   |
| HIST2H3D   | 101         | 7         | 6.93%         | 196          | 12        | 6.12%         | 0.88 [0.39-1.97]     | 0.788    | 0.996   |
| HIST2H4A   | 101         | 8         | 7.92%         | 196          | 14        | 7.14%         | 0.89 [0.42-1.91]     | 0.808    | 1.000   |
| HIST3H2A   | 101         | 7         | 6.93%         | 196          | 21        | 10.71%        | 1.61 [0.76-3.40]     | 0.294    | 0.650   |
| HIST3H2BB  | 101         | 7         | 6.93%         | 196          | 21        | 10.71%        | 1.61 [0.76-3.40]     | 0.294    | 0.650   |
| HIST3H3    | 101         | 7         | 6.93%         | 196          | 21        | 10.71%        | 1.61 [0.76-3.40]     | 0.294    | 0.650   |
| HLA-DRB1   | 101         | 17        | 16.83%        | 196          | 35        | 17.86%        | 1.07 [0.63-1.83]     | 0.826    | 1.000   |
| HLA-DRB5   | 101         | 24        | 23.76%        | 196          | 49        | 25.00%        | 1.07 [0.67-1.71]     | 0.814    | 1.000   |
| HLA-DRB6   | 101         | 17        | 16.83%        | 196          | 33        | 16.84%        | 1.00 [0.58-1.71]     | 0.999    | 1.000   |
| HLF        | 101         | 8         | 7.92%         | 196          | 21        | 10.71%        | 1.39 [0.68-2.85]     | 0.444    | 0.805   |

| Symbol    | CINSARC Low |           |               | CINSARC High |           |               | CINSARC High vs. Low |          |         |
|-----------|-------------|-----------|---------------|--------------|-----------|---------------|----------------------|----------|---------|
|           | N tested    | N altered | Fq alteration | N tested     | N altered | Fq alteration | OR [95%CI]           | p-value* | q-value |
| HLX       | 101         | 6         | 5.94%         | 196          | 18        | 9.18%         | 1.60 [0.72-3.57]     | 0.335    | 0.716   |
| HMCN1     | 101         | 5         | 4.95%         | 196          | 17        | 8.67%         | 1.82 [0.77-4.32]     | 0.252    | 0.623   |
| HMGA2     | 101         | 1         | 0.99%         | 196          | 7         | 3.57%         | 3.70 [0.63-21.75]    | 0.224    | 0.596   |
| HMGB1     | 101         | 1         | 0.99%         | 196          | 5         | 2.55%         | 2.62 [0.43-16.05]    | 0.383    | 0.750   |
| HMGB3P1   | 101         | 4         | 3.96%         | 196          | 6         | 3.06%         | 0.77 [0.26-2.26]     | 0.685    | 0.943   |
| HMOX2     | 101         | 5         | 4.95%         | 196          | 6         | 3.06%         | 0.61 [0.22-1.68]     | 0.418    | 0.779   |
| HMSD      | 101         | 3         | 2.97%         | 196          | 3         | 1.53%         | 0.51 [0.13-1.98]     | 0.412    | 0.774   |
| HNF1B     | 101         | 3         | 2.97%         | 196          | 7         | 3.57%         | 1.21 [0.38-3.83]     | 0.786    | 0.996   |
| HNF4A     | 101         | 2         | 1.98%         | 196          | 4         | 2.04%         | 1.03 [0.24-4.35]     | 0.972    | 1.000   |
| HNF4G     | 101         | 14        | 13.86%        | 196          | 41        | 20.92%        | 1.64 [0.94-2.86]     | 0.141    | 0.535   |
| HNRNPA2B1 | 101         | 0         | 0.00%         | 196          | 5         | 2.55%         | 2.2e+07 [0e+00-Inf]  | 0.992    | 1.000   |
| HNRNPU    | 101         | 5         | 4.95%         | 196          | 18        | 9.18%         | 1.94 [0.82-4.58]     | 0.203    | 0.570   |
| HOMER2    | 101         | 1         | 0.99%         | 196          | 4         | 2.04%         | 2.08 [0.33-13.25]    | 0.514    | 0.805   |
| HOOK3     | 101         | 13        | 12.87%        | 196          | 26        | 13.27%        | 1.04 [0.57-1.88]     | 0.924    | 1.000   |
| HORMAD1   | 101         | 8         | 7.92%         | 196          | 16        | 8.16%         | 1.03 [0.49-2.17]     | 0.942    | 1.000   |
| HOXA10    | 101         | 0         | 0.00%         | 196          | 6         | 3.06%         | 2.7e+07 [0e+00-Inf]  | 0.992    | 1.000   |
| HOXA11-AS | 101         | 0         | 0.00%         | 196          | 6         | 3.06%         | 2.7e+07 [0e+00-Inf]  | 0.992    | 1.000   |
| HOXA11    | 101         | 0         | 0.00%         | 196          | 6         | 3.06%         | 2.7e+07 [0e+00-Inf]  | 0.992    | 1.000   |
| HOXA13    | 101         | 0         | 0.00%         | 196          | 6         | 3.06%         | 2.7e+07 [0e+00-Inf]  | 0.992    | 1.000   |
| HOXA1     | 101         | 0         | 0.00%         | 196          | 6         | 3.06%         | 2.7e+07 [0e+00-Inf]  | 0.992    | 1.000   |
| HOXA2     | 101         | 0         | 0.00%         | 196          | 6         | 3.06%         | 2.7e+07 [0e+00-Inf]  | 0.992    | 1.000   |
| HOXA3     | 101         | 0         | 0.00%         | 196          | 6         | 3.06%         | 2.7e+07 [0e+00-Inf]  | 0.992    | 1.000   |
| HOXA4     | 101         | 0         | 0.00%         | 196          | 6         | 3.06%         | 2.7e+07 [0e+00-Inf]  | 0.992    | 1.000   |
| HOXA5     | 101         | 0         | 0.00%         | 196          | 6         | 3.06%         | 2.7e+07 [0e+00-Inf]  | 0.992    | 1.000   |
| HOXA6     | 101         | 0         | 0.00%         | 196          | 6         | 3.06%         | 2.7e+07 [0e+00-Inf]  | 0.992    | 1.000   |
| HOXA7     | 101         | 0         | 0.00%         | 196          | 6         | 3.06%         | 2.7e+07 [0e+00-Inf]  | 0.992    | 1.000   |
| HOXA9     | 101         | 0         | 0.00%         | 196          | 6         | 3.06%         | 2.7e+07 [0e+00-Inf]  | 0.992    | 1.000   |
| HOXB13    | 101         | 2         | 1.98%         | 196          | 17        | 8.67%         | 4.70 [1.35-16.35]    | 4.11E-02 | 0.507   |
| HOXB1     | 101         | 2         | 1.98%         | 196          | 16        | 8.16%         | 4.40 [1.26-15.37]    | 0.051    | 0.507   |
| HOXB2     | 101         | 2         | 1.98%         | 196          | 16        | 8.16%         | 4.40 [1.26-15.37]    | 0.051    | 0.507   |
| HOXB3     | 101         | 2         | 1.98%         | 196          | 16        | 8.16%         | 4.40 [1.26-15.37]    | 0.051    | 0.507   |
| HOXB4     | 101         | 2         | 1.98%         | 196          | 15        | 7.65%         | 4.10 [1.17-14.39]    | 0.064    | 0.507   |
| HOXB5     | 101         | 2         | 1.98%         | 196          | 16        | 8.16%         | 4.40 [1.26-15.37]    | 0.051    | 0.507   |
| HOXB6     | 101         | 2         | 1.98%         | 196          | 16        | 8.16%         | 4.40 [1.26-15.37]    | 0.051    | 0.507   |
| HOXB7     | 101         | 2         | 1.98%         | 196          | 17        | 8.67%         | 4.70 [1.35-16.35]    | 4.11E-02 | 0.507   |
| HOXB8     | 101         | 2         | 1.98%         | 196          | 17        | 8.67%         | 4.70 [1.35-16.35]    | 4.11E-02 | 0.507   |
| HOXB9     | 101         | 2         | 1.98%         | 196          | 17        | 8.67%         | 4.70 [1.35-16.35]    | 4.11E-02 | 0.507   |
| HPS3      | 101         | 3         | 2.97%         | 196          | 2         | 1.02%         | 0.34 [0.074-1.53]    | 0.237    | 0.599   |
| HPYR1     | 101         | 15        | 14.85%        | 196          | 55        | 28.06%        | 2.24 [1.32-3.80]     | 1.24E-02 | 0.507   |
| HRH3      | 101         | 7         | 6.93%         | 196          | 12        | 6.12%         | 0.88 [0.39-1.97]     | 0.788    | 0.996   |
| RBFOX3    | 101         | 3         | 2.97%         | 196          | 15        | 7.65%         | 2.71 [0.94-7.82]     | 0.122    | 0.534   |
| HRNR      | 101         | 7         | 6.93%         | 196          | 13        | 6.63%         | 0.95 [0.43-2.12]     | 0.923    | 1.000   |
| HS3ST2    | 101         | 5         | 4.95%         | 196          | 2         | 1.02%         | 0.20 [0.049-0.80]    | 0.056    | 0.507   |
| HS3ST4    | 101         | 5         | 4.95%         | 196          | 3         | 1.53%         | 0.30 [0.088-1.01]    | 0.103    | 0.507   |
| HS3ST6    | 101         | 6         | 5.94%         | 196          | 5         | 2.55%         | 0.41 [0.15-1.15]     | 0.154    | 0.535   |
| HSD11B1   | 101         | 6         | 5.94%         | 196          | 22        | 11.22%        | 2.00 [0.91-4.39]     | 0.146    | 0.535   |
| HSD17B7   | 101         | 5         | 4.95%         | 196          | 14        | 7.14%         | 1.48 [0.61-3.57]     | 0.467    | 0.805   |
| HSD3B7    | 101         | 4         | 3.96%         | 196          | 6         | 3.06%         | 0.77 [0.26-2.26]     | 0.685    | 0.943   |
| HSF1      | 101         | 18        | 17.82%        | 196          | 50        | 25.51%        | 1.58 [0.95-2.62]     | 0.137    | 0.535   |
| HSF5      | 101         | 7         | 6.93%         | 196          | 28        | 14.29%        | 2.24 [1.08-4.63]     | 0.068    | 0.507   |
| HSFY2     | 101         | 0         | 0.00%         | 196          | 0         | 0.00%         | 1.00 [0e+00-Inf]     | 1.000    | 1.000   |
| HSPA6     | 101         | 7         | 6.93%         | 196          | 19        | 9.69%         | 1.44 [0.68-3.07]     | 0.427    | 0.791   |
| HSPA7     | 101         | 9         | 8.91%         | 196          | 22        | 11.22%        | 1.29 [0.65-2.56]     | 0.538    | 0.835   |
| HTR3C     | 101         | 3         | 2.97%         | 196          | 2         | 1.02%         | 0.34 [0.074-1.53]    | 0.237    | 0.599   |
| HTR3D     | 101         | 3         | 2.97%         | 196          | 2         | 1.02%         | 0.34 [0.074-1.53]    | 0.237    | 0.599   |
| HTR3E     | 101         | 3         | 2.97%         | 196          | 2         | 1.02%         | 0.34 [0.074-1.53]    | 0.237    | 0.599   |
| HTRA4     | 101         | 12        | 11.88%        | 196          | 39        | 19.90%        | 1.84 [1.03-3.31]     | 0.086    | 0.507   |
| IARS2     | 101         | 6         | 5.94%         | 196          | 20        | 10.20%        | 1.80 [0.81-3.98]     | 0.224    | 0.596   |
| ICAM2     | 101         | 8         | 7.92%         | 196          | 29        | 14.80%        | 2.02 [1.01-4.03]     | 0.094    | 0.507   |
| IDH2      | 101         | 1         | 0.99%         | 196          | 8         | 4.08%         | 4.26 [0.73-24.65]    | 0.175    | 0.535   |
| IDO1      | 101         | 13        | 12.87%        | 196          | 32        | 16.33%        | 1.32 [0.74-2.37]     | 0.432    | 0.798   |
| IDO2      | 101         | 13        | 12.87%        | 196          | 32        | 16.33%        | 1.32 [0.74-2.37]     | 0.432    | 0.798   |
| IERS5     | 101         | 5         | 4.95%         | 196          | 19        | 9.69%         | 2.06 [0.88-4.83]     | 0.163    | 0.535   |
| IFI16     | 101         | 6         | 5.94%         | 196          | 8         | 4.08%         | 0.67 [0.27-1.68]     | 0.476    | 0.805   |
| IFNG      | 101         | 2         | 1.98%         | 196          | 15        | 7.65%         | 4.10 [1.17-14.39]    | 0.064    | 0.507   |
| IFT140    | 101         | 6         | 5.94%         | 196          | 5         | 2.55%         | 0.41 [0.15-1.15]     | 0.154    | 0.535   |
| IFT20     | 101         | 4         | 3.96%         | 196          | 7         | 3.57%         | 0.90 [0.31-2.57]     | 0.867    | 1.000   |
| IFT52     | 101         | 2         | 1.98%         | 196          | 4         | 2.04%         | 1.03 [0.24-4.35]     | 0.972    | 1.000   |
| IGF1R     | 101         | 1         | 0.99%         | 196          | 9         | 4.59%         | 4.81 [0.84-27.58]    | 0.139    | 0.535   |
| IGF2BP1   | 101         | 3         | 2.97%         | 196          | 17        | 8.67%         | 3.10 [1.09-8.87]     | 0.076    | 0.507   |
| IGF2BP2   | 101         | 3         | 2.97%         | 196          | 2         | 1.02%         | 0.34 [0.074-1.53]    | 0.237    | 0.599   |

| Symbol          | CINSARC Low |           |               | CINSARC High |           |               | CINSARC High vs. Low |          |         |
|-----------------|-------------|-----------|---------------|--------------|-----------|---------------|----------------------|----------|---------|
|                 | N tested    | N altered | Fq alteration | N tested     | N altered | Fq alteration | OR [95%CI]           | p-value* | q-value |
| <i>IGF2BP3</i>  | 101         | 0         | 0.00%         | 196          | 6         | 3.06%         | 2.7e+07 [0e+00-Inf]  | 0.992    | 1.000   |
| <i>IGFALS</i>   | 101         | 6         | 5.94%         | 196          | 5         | 2.55%         | 0.41 [0.15-1.15]     | 0.154    | 0.535   |
| <i>IGFBP4</i>   | 101         | 4         | 3.96%         | 196          | 5         | 2.55%         | 0.63 [0.21-1.95]     | 0.505    | 0.805   |
| <i>IGFN1</i>    | 101         | 6         | 5.94%         | 196          | 24        | 12.24%        | 2.21 [1.01-4.82]     | 0.095    | 0.507   |
| <i>IGHMBP2</i>  | 101         | 15        | 14.85%        | 196          | 37        | 18.88%        | 1.33 [0.77-2.31]     | 0.388    | 0.757   |
| <i>IGSF22</i>   | 101         | 1         | 0.99%         | 196          | 4         | 2.04%         | 2.08 [0.33-13.25]    | 0.514    | 0.805   |
| <i>IGSF6</i>    | 101         | 6         | 5.94%         | 196          | 2         | 1.02%         | 0.16 [0.042-0.64]    | 2.82E-02 | 0.507   |
| <i>IGSF8</i>    | 101         | 6         | 5.94%         | 196          | 11        | 5.61%         | 0.94 [0.40-2.23]     | 0.908    | 1.000   |
| <i>IGSF9</i>    | 101         | 6         | 5.94%         | 196          | 11        | 5.61%         | 0.94 [0.40-2.23]     | 0.908    | 1.000   |
| <i>IKBKB</i>    | 101         | 14        | 13.86%        | 196          | 31        | 15.82%        | 1.17 [0.66-2.07]     | 0.656    | 0.931   |
| <i>IKBKE</i>    | 101         | 6         | 5.94%         | 196          | 24        | 12.24%        | 2.21 [1.01-4.82]     | 0.095    | 0.507   |
| <i>IKZF3</i>    | 101         | 6         | 5.94%         | 196          | 12        | 6.12%         | 1.03 [0.44-2.41]     | 0.950    | 1.000   |
| <i>IL10</i>     | 101         | 6         | 5.94%         | 196          | 25        | 12.76%        | 2.31 [1.06-5.03]     | 0.076    | 0.507   |
| <i>IL11RA</i>   | 101         | 1         | 0.99%         | 196          | 4         | 2.04%         | 2.08 [0.33-13.25]    | 0.514    | 0.805   |
| <i>IL11</i>     | 101         | 1         | 0.99%         | 196          | 4         | 2.04%         | 2.08 [0.33-13.25]    | 0.514    | 0.805   |
| <i>IL18BP</i>   | 101         | 4         | 3.96%         | 196          | 5         | 2.55%         | 0.63 [0.21-1.95]     | 0.505    | 0.805   |
| <i>IL19</i>     | 101         | 6         | 5.94%         | 196          | 25        | 12.76%        | 2.31 [1.06-5.03]     | 0.076    | 0.507   |
| <i>IL1RAP</i>   | 101         | 2         | 1.98%         | 196          | 3         | 1.53%         | 0.77 [0.17-3.50]     | 0.776    | 0.996   |
| <i>IL20</i>     | 101         | 7         | 6.93%         | 196          | 25        | 12.76%        | 1.96 [0.94-4.09]     | 0.131    | 0.535   |
| <i>IL21R</i>    | 101         | 5         | 4.95%         | 196          | 3         | 1.53%         | 0.30 [0.088-1.01]    | 0.103    | 0.507   |
| <i>IL22</i>     | 101         | 2         | 1.98%         | 196          | 15        | 7.65%         | 4.10 [1.17-14.39]    | 0.064    | 0.507   |
| <i>IL24</i>     | 101         | 7         | 6.93%         | 196          | 25        | 12.76%        | 1.96 [0.94-4.09]     | 0.131    | 0.535   |
| <i>IL26</i>     | 101         | 2         | 1.98%         | 196          | 15        | 7.65%         | 4.10 [1.17-14.39]    | 0.064    | 0.507   |
| <i>IL27</i>     | 101         | 5         | 4.95%         | 196          | 3         | 1.53%         | 0.30 [0.088-1.01]    | 0.103    | 0.507   |
| <i>IL32</i>     | 101         | 7         | 6.93%         | 196          | 4         | 2.04%         | 0.28 [0.098-0.80]    | 4.63E-02 | 0.507   |
| <i>IL4R</i>     | 101         | 5         | 4.95%         | 196          | 3         | 1.53%         | 0.30 [0.088-1.01]    | 0.103    | 0.507   |
| <i>IL6R</i>     | 101         | 7         | 6.93%         | 196          | 11        | 5.61%         | 0.80 [0.35-1.82]     | 0.652    | 0.928   |
| <i>IL6</i>      | 101         | 0         | 0.00%         | 196          | 6         | 3.06%         | 2.7e+07 [0e+00-Inf]  | 0.992    | 1.000   |
| <i>IL7</i>      | 101         | 14        | 13.86%        | 196          | 47        | 23.98%        | 1.96 [1.13-3.39]     | 4.33E-02 | 0.507   |
| <i>ILDR2</i>    | 101         | 5         | 4.95%         | 196          | 13        | 6.63%         | 1.36 [0.56-3.32]     | 0.566    | 0.852   |
| <i>ILF2</i>     | 101         | 7         | 6.93%         | 196          | 12        | 6.12%         | 0.88 [0.39-1.97]     | 0.788    | 0.996   |
| <i>IMPA1</i>    | 101         | 18        | 17.82%        | 196          | 46        | 23.47%        | 1.41 [0.85-2.35]     | 0.263    | 0.643   |
| <i>IMPAD1</i>   | 101         | 14        | 13.86%        | 196          | 29        | 14.80%        | 1.08 [0.61-1.92]     | 0.828    | 1.000   |
| <i>INMT</i>     | 101         | 0         | 0.00%         | 196          | 7         | 3.57%         | 3.2e+07 [0e+00-Inf]  | 0.992    | 1.000   |
| <i>INO80E</i>   | 101         | 5         | 4.95%         | 196          | 4         | 2.04%         | 0.40 [0.13-1.23]     | 0.179    | 0.535   |
| <i>INPPL1</i>   | 101         | 5         | 4.95%         | 196          | 8         | 4.08%         | 0.82 [0.31-2.13]     | 0.729    | 0.986   |
| <i>INSC</i>     | 101         | 1         | 0.99%         | 196          | 4         | 2.04%         | 2.08 [0.33-13.25]    | 0.514    | 0.805   |
| <i>INSM2</i>    | 101         | 0         | 0.00%         | 196          | 9         | 4.59%         | 4.1e+07 [0e+00-Inf]  | 0.992    | 1.000   |
| <i>INSRR</i>    | 101         | 7         | 6.93%         | 196          | 8         | 4.08%         | 0.57 [0.24-1.37]     | 0.294    | 0.650   |
| <i>INTS2</i>    | 101         | 9         | 8.91%         | 196          | 32        | 16.33%        | 1.99 [1.03-3.85]     | 0.084    | 0.507   |
| <i>INTS3</i>    | 101         | 7         | 6.93%         | 196          | 12        | 6.12%         | 0.88 [0.39-1.97]     | 0.788    | 0.996   |
| <i>INTS4</i>    | 101         | 10        | 9.90%         | 196          | 21        | 10.71%        | 1.09 [0.56-2.13]     | 0.828    | 1.000   |
| <i>INTS7</i>    | 101         | 6         | 5.94%         | 196          | 20        | 10.20%        | 1.80 [0.81-3.98]     | 0.224    | 0.596   |
| <i>INTS8</i>    | 101         | 16        | 15.84%        | 196          | 54        | 27.55%        | 2.02 [1.20-3.40]     | 2.60E-02 | 0.507   |
| <i>IPO9</i>     | 101         | 7         | 6.93%         | 196          | 24        | 12.24%        | 1.87 [0.90-3.92]     | 0.161    | 0.535   |
| <i>IQCG</i>     | 101         | 3         | 2.97%         | 196          | 4         | 2.04%         | 0.68 [0.19-2.43]     | 0.619    | 0.898   |
| <i>IQCK</i>     | 101         | 5         | 4.95%         | 196          | 3         | 1.53%         | 0.30 [0.088-1.01]    | 0.103    | 0.507   |
| <i>IQGAP1</i>   | 101         | 2         | 1.98%         | 196          | 5         | 2.55%         | 1.30 [0.32-5.21]     | 0.759    | 0.996   |
| <i>IQGAP3</i>   | 101         | 6         | 5.94%         | 196          | 8         | 4.08%         | 0.67 [0.27-1.68]     | 0.476    | 0.805   |
| <i>IRAK3</i>    | 101         | 2         | 1.98%         | 196          | 9         | 4.59%         | 2.38 [0.65-8.76]     | 0.273    | 0.643   |
| <i>IRF2BP2</i>  | 101         | 7         | 6.93%         | 196          | 20        | 10.20%        | 1.53 [0.72-3.24]     | 0.355    | 0.722   |
| <i>IRF6</i>     | 101         | 6         | 5.94%         | 196          | 22        | 11.22%        | 2.00 [0.91-4.39]     | 0.146    | 0.535   |
| <i>IRS2</i>     | 101         | 0         | 0.00%         | 196          | 5         | 2.55%         | 2.2e+07 [0e+00-Inf]  | 0.992    | 1.000   |
| <i>ISG20L2</i>  | 101         | 7         | 6.93%         | 196          | 8         | 4.08%         | 0.57 [0.24-1.37]     | 0.294    | 0.650   |
| <i>ISG20</i>    | 101         | 0         | 0.00%         | 196          | 6         | 3.06%         | 2.7e+07 [0e+00-Inf]  | 0.992    | 1.000   |
| <i>ISOC2</i>    | 101         | 2         | 1.98%         | 196          | 4         | 2.04%         | 1.03 [0.24-4.35]     | 0.972    | 1.000   |
| <i>ITCH</i>     | 101         | 3         | 2.97%         | 196          | 3         | 1.53%         | 0.51 [0.13-1.98]     | 0.412    | 0.774   |
| <i>ITGA10</i>   | 101         | 5         | 4.95%         | 196          | 10        | 5.10%         | 1.03 [0.41-2.60]     | 0.955    | 1.000   |
| <i>ITGA3</i>    | 101         | 4         | 3.96%         | 196          | 17        | 8.67%         | 2.30 [0.90-5.88]     | 0.143    | 0.535   |
| <i>ITGAD</i>    | 101         | 4         | 3.96%         | 196          | 4         | 2.04%         | 0.51 [0.16-1.65]     | 0.342    | 0.716   |
| <i>ITGAL</i>    | 101         | 4         | 3.96%         | 196          | 5         | 2.55%         | 0.63 [0.21-1.95]     | 0.505    | 0.805   |
| <i>ITGAM</i>    | 101         | 4         | 3.96%         | 196          | 5         | 2.55%         | 0.63 [0.21-1.95]     | 0.505    | 0.805   |
| <i>ITGAX</i>    | 101         | 4         | 3.96%         | 196          | 4         | 2.04%         | 0.51 [0.16-1.65]     | 0.342    | 0.716   |
| <i>ITGB3</i>    | 101         | 1         | 0.99%         | 196          | 7         | 3.57%         | 3.70 [0.63-21.75]    | 0.224    | 0.596   |
| <i>ITGB4</i>    | 101         | 4         | 3.96%         | 196          | 12        | 6.12%         | 1.58 [0.60-4.18]     | 0.438    | 0.798   |
| <i>ITLN1</i>    | 101         | 6         | 5.94%         | 196          | 16        | 8.16%         | 1.41 [0.62-3.18]     | 0.490    | 0.805   |
| <i>ITLN2</i>    | 101         | 6         | 5.94%         | 196          | 17        | 8.67%         | 1.50 [0.67-3.38]     | 0.407    | 0.774   |
| <i>ITPKB</i>    | 101         | 6         | 5.94%         | 196          | 19        | 9.69%         | 1.70 [0.77-3.78]     | 0.274    | 0.643   |
| <i>ITPRIPL2</i> | 101         | 5         | 4.95%         | 196          | 4         | 2.04%         | 0.40 [0.13-1.23]     | 0.179    | 0.535   |
| <i>IVL</i>      | 101         | 7         | 6.93%         | 196          | 11        | 5.61%         | 0.80 [0.35-1.82]     | 0.652    | 0.928   |
| <i>IVNS1ABP</i> | 101         | 5         | 4.95%         | 196          | 19        | 9.69%         | 2.06 [0.88-4.83]     | 0.163    | 0.535   |



| Symbol   | CINSARC Low |           |               | CINSARC High |           |               | CINSARC High vs. Low |          |         |
|----------|-------------|-----------|---------------|--------------|-----------|---------------|----------------------|----------|---------|
|          | N tested    | N altered | Fq alteration | N tested     | N altered | Fq alteration | OR [95%CI]           | p-value* | q-value |
| JAZF1    | 101         | 0         | 0.00%         | 196          | 7         | 3.57%         | 3.2e+07 [0e+00-Inf]  | 0.992    | 1.000   |
| JMJD4    | 101         | 6         | 5.94%         | 196          | 21        | 10.71%        | 1.90 [0.86-4.19]     | 0.181    | 0.535   |
| KDM8     | 101         | 5         | 4.95%         | 196          | 3         | 1.53%         | 0.30 [0.088-1.01]    | 0.103    | 0.507   |
| JMJD6    | 101         | 3         | 2.97%         | 196          | 13        | 6.63%         | 2.32 [0.79-6.79]     | 0.197    | 0.570   |
| JMJD8    | 101         | 6         | 5.94%         | 196          | 4         | 2.04%         | 0.33 [0.11-0.97]     | 0.092    | 0.507   |
| JPH1     | 101         | 17        | 16.83%        | 196          | 42        | 21.43%        | 1.35 [0.80-2.27]     | 0.348    | 0.722   |
| JPH2     | 101         | 3         | 2.97%         | 196          | 3         | 1.53%         | 0.51 [0.13-1.98]     | 0.412    | 0.774   |
| JRK      | 101         | 16        | 15.84%        | 196          | 49        | 25.00%        | 1.77 [1.05-2.99]     | 0.073    | 0.507   |
| JTB      | 101         | 7         | 6.93%         | 196          | 13        | 6.63%         | 0.95 [0.43-2.12]     | 0.923    | 1.000   |
| KATNAL1  | 101         | 1         | 0.99%         | 196          | 4         | 2.04%         | 2.08 [0.33-13.25]    | 0.514    | 0.805   |
| KBTBD2   | 101         | 0         | 0.00%         | 196          | 7         | 3.57%         | 3.2e+07 [0e+00-Inf]  | 0.992    | 1.000   |
| KCNB1    | 101         | 7         | 6.93%         | 196          | 8         | 4.08%         | 0.57 [0.24-1.37]     | 0.294    | 0.650   |
| KCNB2    | 101         | 15        | 14.85%        | 196          | 39        | 19.90%        | 1.42 [0.82-2.46]     | 0.287    | 0.650   |
| KCNC1    | 101         | 1         | 0.99%         | 196          | 4         | 2.04%         | 2.08 [0.33-13.25]    | 0.514    | 0.805   |
| KCNC2    | 101         | 2         | 1.98%         | 196          | 7         | 3.57%         | 1.83 [0.48-6.96]     | 0.455    | 0.805   |
| KCNE3    | 101         | 6         | 5.94%         | 196          | 12        | 6.12%         | 1.03 [0.44-2.41]     | 0.950    | 1.000   |
| KCNG1    | 101         | 6         | 5.94%         | 196          | 13        | 6.63%         | 1.12 [0.49-2.60]     | 0.817    | 1.000   |
| KCNH1    | 101         | 7         | 6.93%         | 196          | 20        | 10.20%        | 1.53 [0.72-3.24]     | 0.355    | 0.722   |
| KCNH6    | 101         | 8         | 7.92%         | 196          | 30        | 15.31%        | 2.10 [1.06-4.18]     | 0.076    | 0.507   |
| KCNJ10   | 101         | 6         | 5.94%         | 196          | 11        | 5.61%         | 0.94 [0.40-2.23]     | 0.908    | 1.000   |
| KCNJ11   | 101         | 1         | 0.99%         | 196          | 4         | 2.04%         | 2.08 [0.33-13.25]    | 0.514    | 0.805   |
| KCNJ16   | 101         | 4         | 3.96%         | 196          | 21        | 10.71%        | 2.91 [1.16-7.31]     | 0.056    | 0.507   |
| KCNJ2    | 101         | 4         | 3.96%         | 196          | 20        | 10.20%        | 2.76 [1.09-6.95]     | 0.071    | 0.507   |
| KCNJ9    | 101         | 6         | 5.94%         | 196          | 11        | 5.61%         | 0.94 [0.40-2.23]     | 0.908    | 1.000   |
| KCNK15   | 101         | 4         | 3.96%         | 196          | 4         | 2.04%         | 0.51 [0.16-1.65]     | 0.342    | 0.716   |
| KCNK1    | 101         | 6         | 5.94%         | 196          | 20        | 10.20%        | 1.80 [0.81-3.98]     | 0.224    | 0.596   |
| KCNK2    | 101         | 6         | 5.94%         | 196          | 20        | 10.20%        | 1.80 [0.81-3.98]     | 0.224    | 0.596   |
| KCNK9    | 101         | 17        | 16.83%        | 196          | 50        | 25.51%        | 1.69 [1.01-2.83]     | 0.092    | 0.507   |
| KCNMB2   | 101         | 3         | 2.97%         | 196          | 3         | 1.53%         | 0.51 [0.13-1.98]     | 0.412    | 0.774   |
| KCNMB3   | 101         | 4         | 3.96%         | 196          | 3         | 1.53%         | 0.38 [0.11-1.35]     | 0.207    | 0.573   |
| KCNMB4   | 101         | 3         | 2.97%         | 196          | 15        | 7.65%         | 2.71 [0.94-7.82]     | 0.122    | 0.534   |
| KCNN3    | 101         | 8         | 7.92%         | 196          | 13        | 6.63%         | 0.83 [0.38-1.78]     | 0.682    | 0.943   |
| KCNQ2    | 101         | 6         | 5.94%         | 196          | 14        | 7.14%         | 1.22 [0.53-2.79]     | 0.696    | 0.951   |
| KCNQ3    | 101         | 14        | 13.86%        | 196          | 55        | 28.06%        | 2.42 [1.41-4.16]     | 7.11E-03 | 0.507   |
| KCNS1    | 101         | 5         | 4.95%         | 196          | 2         | 1.02%         | 0.20 [0.049-0.80]    | 0.056    | 0.507   |
| KCNS2    | 101         | 16        | 15.84%        | 196          | 53        | 27.04%        | 1.97 [1.17-3.31]     | 3.23E-02 | 0.507   |
| KCNT2    | 101         | 5         | 4.95%         | 196          | 19        | 9.69%         | 2.06 [0.88-4.83]     | 0.163    | 0.535   |
| KCNU1    | 101         | 9         | 8.91%         | 196          | 37        | 18.88%        | 2.38 [1.24-4.55]     | 2.79E-02 | 0.507   |
| KCNV1    | 101         | 16        | 15.84%        | 196          | 54        | 27.55%        | 2.02 [1.20-3.40]     | 2.60E-02 | 0.507   |
| KCTD13   | 101         | 5         | 4.95%         | 196          | 4         | 2.04%         | 0.40 [0.13-1.23]     | 0.179    | 0.535   |
| KCTD14   | 101         | 9         | 8.91%         | 196          | 19        | 9.69%         | 1.10 [0.55-2.21]     | 0.827    | 1.000   |
| KCTD21   | 101         | 9         | 8.91%         | 196          | 18        | 9.18%         | 1.03 [0.51-2.09]     | 0.938    | 1.000   |
| KCTD2    | 101         | 5         | 4.95%         | 196          | 12        | 6.12%         | 1.25 [0.51-3.08]     | 0.681    | 0.943   |
| KCTD3    | 101         | 6         | 5.94%         | 196          | 20        | 10.20%        | 1.80 [0.81-3.98]     | 0.224    | 0.596   |
| KCTD5    | 101         | 6         | 5.94%         | 196          | 5         | 2.55%         | 0.41 [0.15-1.15]     | 0.154    | 0.535   |
| KDM2A    | 101         | 11        | 10.89%        | 196          | 16        | 8.16%         | 0.73 [0.37-1.43]     | 0.440    | 0.800   |
| KDM5B    | 101         | 7         | 6.93%         | 196          | 27        | 13.78%        | 2.15 [1.03-4.45]     | 0.085    | 0.507   |
| KDM5D    | 101         | 0         | 0.00%         | 196          | 0         | 0.00%         | 1.00 [0e+00-Inf]     | 1.000    | 1.000   |
| KDSR     | 101         | 3         | 2.97%         | 196          | 2         | 1.02%         | 0.34 [0.074-1.53]    | 0.237    | 0.599   |
| KEL      | 101         | 2         | 1.98%         | 196          | 4         | 2.04%         | 1.03 [0.24-4.35]     | 0.972    | 1.000   |
| KERA     | 101         | 0         | 0.00%         | 196          | 5         | 2.55%         | 2.2e+07 [0e+00-Inf]  | 0.992    | 1.000   |
| KHDRBS3  | 101         | 16        | 15.84%        | 196          | 51        | 26.02%        | 1.87 [1.11-3.15]     | 4.89E-02 | 0.507   |
| KIAA0040 | 101         | 5         | 4.95%         | 196          | 16        | 8.16%         | 1.71 [0.72-4.07]     | 0.311    | 0.680   |
| KIAA0087 | 101         | 0         | 0.00%         | 196          | 5         | 2.55%         | 2.2e+07 [0e+00-Inf]  | 0.992    | 1.000   |
| KIAA0100 | 101         | 3         | 2.97%         | 196          | 8         | 4.08%         | 1.39 [0.45-4.31]     | 0.632    | 0.909   |
| SPIDR    | 101         | 13        | 12.87%        | 196          | 28        | 14.29%        | 1.13 [0.62-2.04]     | 0.738    | 0.996   |
| KIAA0391 | 101         | 0         | 0.00%         | 196          | 9         | 4.59%         | 4.1e+07 [0e+00-Inf]  | 0.992    | 1.000   |
| TTI1     | 101         | 5         | 4.95%         | 196          | 3         | 1.53%         | 0.30 [0.088-1.01]    | 0.103    | 0.507   |
| KIAA0556 | 101         | 5         | 4.95%         | 196          | 3         | 1.53%         | 0.30 [0.088-1.01]    | 0.103    | 0.507   |
| CLUHP3   | 101         | 4         | 3.96%         | 196          | 4         | 2.04%         | 0.51 [0.16-1.65]     | 0.342    | 0.716   |
| ZSWIM8   | 101         | 0         | 0.00%         | 196          | 5         | 2.55%         | 2.2e+07 [0e+00-Inf]  | 0.992    | 1.000   |
| MAP10    | 101         | 6         | 5.94%         | 196          | 20        | 10.20%        | 1.80 [0.81-3.98]     | 0.224    | 0.596   |
| KIAA1614 | 101         | 5         | 4.95%         | 196          | 19        | 9.69%         | 2.06 [0.88-4.83]     | 0.163    | 0.535   |
| KIAA1755 | 101         | 4         | 3.96%         | 196          | 4         | 2.04%         | 0.51 [0.16-1.65]     | 0.342    | 0.716   |
| KIF14    | 101         | 6         | 5.94%         | 196          | 24        | 12.24%        | 2.21 [1.01-4.82]     | 0.095    | 0.507   |
| KIF19    | 101         | 6         | 5.94%         | 196          | 14        | 7.14%         | 1.22 [0.53-2.79]     | 0.696    | 0.951   |
| KIF21B   | 101         | 6         | 5.94%         | 196          | 24        | 12.24%        | 2.21 [1.01-4.82]     | 0.095    | 0.507   |
| KIF22    | 101         | 5         | 4.95%         | 196          | 3         | 1.53%         | 0.30 [0.088-1.01]    | 0.103    | 0.507   |
| KIF26B   | 101         | 4         | 3.96%         | 196          | 17        | 8.67%         | 2.30 [0.90-5.88]     | 0.143    | 0.535   |
| KIF2B    | 101         | 7         | 6.93%         | 196          | 12        | 6.12%         | 0.88 [0.39-1.97]     | 0.788    | 0.996   |
| KIF7     | 101         | 1         | 0.99%         | 196          | 7         | 3.57%         | 3.70 [0.63-21.75]    | 0.224    | 0.596   |

| Symbol    | CINSARC Low |           |               | CINSARC High |           |               | CINSARC High vs. Low |          |         |
|-----------|-------------|-----------|---------------|--------------|-----------|---------------|----------------------|----------|---------|
|           | N tested    | N altered | Fq alteration | N tested     | N altered | Fq alteration | OR [95%CI]           | p-value* | q-value |
| KIFAP3    | 101         | 5         | 4.95%         | 196          | 12        | 6.12%         | 1.25 [0.51-3.08]     | 0.681    | 0.943   |
| KIFC2     | 101         | 18        | 17.82%        | 196          | 49        | 25.00%        | 1.54 [0.93-2.55]     | 0.163    | 0.535   |
| KIR2DL1   | 101         | 3         | 2.97%         | 196          | 6         | 3.06%         | 1.03 [0.32-3.36]     | 0.965    | 1.000   |
| KIR2DL3   | 101         | 1         | 0.99%         | 196          | 4         | 2.04%         | 2.08 [0.33-13.25]    | 0.514    | 0.805   |
| KIR2DL4   | 101         | 3         | 2.97%         | 196          | 7         | 3.57%         | 1.21 [0.38-3.83]     | 0.786    | 0.996   |
| KIR3DL1   | 101         | 1         | 0.99%         | 196          | 5         | 2.55%         | 2.62 [0.43-16.05]    | 0.383    | 0.750   |
| KIR3DL3   | 101         | 1         | 0.99%         | 196          | 4         | 2.04%         | 2.08 [0.33-13.25]    | 0.514    | 0.805   |
| KISS1     | 101         | 7         | 6.93%         | 196          | 28        | 14.29%        | 2.24 [1.08-4.63]     | 0.068    | 0.507   |
| KITLG     | 101         | 0         | 0.00%         | 196          | 5         | 2.55%         | 2.2e+07 [0e+00-Inf]  | 0.992    | 1.000   |
| KLC2      | 101         | 3         | 2.97%         | 196          | 5         | 2.55%         | 0.86 [0.25-2.89]     | 0.833    | 1.000   |
| KLF10     | 101         | 15        | 14.85%        | 196          | 56        | 28.57%        | 2.29 [1.35-3.89]     | 9.81E-03 | 0.507   |
| KLHDC8A   | 101         | 7         | 6.93%         | 196          | 27        | 13.78%        | 2.15 [1.03-4.45]     | 0.085    | 0.507   |
| KLHDC9    | 101         | 6         | 5.94%         | 196          | 17        | 8.67%         | 1.50 [0.67-3.38]     | 0.407    | 0.774   |
| KLHL12    | 101         | 7         | 6.93%         | 196          | 28        | 14.29%        | 2.24 [1.08-4.63]     | 0.068    | 0.507   |
| KLHL20    | 101         | 5         | 4.95%         | 196          | 13        | 6.63%         | 1.36 [0.56-3.32]     | 0.566    | 0.852   |
| KLHL24    | 101         | 3         | 2.97%         | 196          | 2         | 1.02%         | 0.34 [0.074-1.53]    | 0.237    | 0.599   |
| KLHL25    | 101         | 1         | 0.99%         | 196          | 5         | 2.55%         | 2.62 [0.43-16.05]    | 0.383    | 0.750   |
| KLHL35    | 101         | 4         | 3.96%         | 196          | 17        | 8.67%         | 2.30 [0.90-5.88]     | 0.143    | 0.535   |
| KLHL38    | 101         | 14        | 13.86%        | 196          | 57        | 29.08%        | 2.55 [1.49-4.37]     | 4.36E-03 | 0.507   |
| KLHL6     | 101         | 3         | 2.97%         | 196          | 2         | 1.02%         | 0.34 [0.074-1.53]    | 0.237    | 0.599   |
| KLHL7     | 101         | 0         | 0.00%         | 196          | 6         | 3.06%         | 2.7e+07 [0e+00-Inf]  | 0.992    | 1.000   |
| KMO       | 101         | 4         | 3.96%         | 196          | 20        | 10.20%        | 2.76 [1.09-6.95]     | 0.071    | 0.507   |
| KPNA2     | 101         | 10        | 9.90%         | 196          | 27        | 13.78%        | 1.45 [0.76-2.77]     | 0.340    | 0.716   |
| KPNB1     | 101         | 2         | 1.98%         | 196          | 8         | 4.08%         | 2.11 [0.56-7.86]     | 0.352    | 0.722   |
| KPRP      | 101         | 7         | 6.93%         | 196          | 13        | 6.63%         | 0.95 [0.43-2.12]     | 0.923    | 1.000   |
| KREMEN2   | 101         | 6         | 5.94%         | 196          | 4         | 2.04%         | 0.33 [0.11-0.97]     | 0.092    | 0.507   |
| KRR1      | 101         | 2         | 1.98%         | 196          | 5         | 2.55%         | 1.30 [0.32-5.21]     | 0.759    | 0.996   |
| KRT10     | 101         | 2         | 1.98%         | 196          | 5         | 2.55%         | 1.30 [0.32-5.21]     | 0.759    | 0.996   |
| KRT12     | 101         | 1         | 0.99%         | 196          | 4         | 2.04%         | 2.08 [0.33-13.25]    | 0.514    | 0.805   |
| KRT222    | 101         | 3         | 2.97%         | 196          | 5         | 2.55%         | 0.86 [0.25-2.89]     | 0.833    | 1.000   |
| KRT23     | 101         | 1         | 0.99%         | 196          | 4         | 2.04%         | 2.08 [0.33-13.25]    | 0.514    | 0.805   |
| KRT24     | 101         | 2         | 1.98%         | 196          | 5         | 2.55%         | 1.30 [0.32-5.21]     | 0.759    | 0.996   |
| KRT25     | 101         | 2         | 1.98%         | 196          | 5         | 2.55%         | 1.30 [0.32-5.21]     | 0.759    | 0.996   |
| KRT26     | 101         | 2         | 1.98%         | 196          | 5         | 2.55%         | 1.30 [0.32-5.21]     | 0.759    | 0.996   |
| KRT27     | 101         | 2         | 1.98%         | 196          | 5         | 2.55%         | 1.30 [0.32-5.21]     | 0.759    | 0.996   |
| KRT28     | 101         | 2         | 1.98%         | 196          | 5         | 2.55%         | 1.30 [0.32-5.21]     | 0.759    | 0.996   |
| KRT34     | 101         | 2         | 1.98%         | 196          | 7         | 3.57%         | 1.83 [0.48-6.96]     | 0.455    | 0.805   |
| KRTAP5-10 | 101         | 10        | 9.90%         | 196          | 18        | 9.18%         | 0.92 [0.47-1.82]     | 0.841    | 1.000   |
| KRTAP5-11 | 101         | 10        | 9.90%         | 196          | 18        | 9.18%         | 0.92 [0.47-1.82]     | 0.841    | 1.000   |
| KRTAP5-7  | 101         | 10        | 9.90%         | 196          | 20        | 10.20%        | 1.03 [0.53-2.02]     | 0.935    | 1.000   |
| KRTAP5-8  | 101         | 10        | 9.90%         | 196          | 20        | 10.20%        | 1.03 [0.53-2.02]     | 0.935    | 1.000   |
| KRTAP5-9  | 101         | 10        | 9.90%         | 196          | 18        | 9.18%         | 0.92 [0.47-1.82]     | 0.841    | 1.000   |
| KRTCAP2   | 101         | 7         | 6.93%         | 196          | 13        | 6.63%         | 0.95 [0.43-2.12]     | 0.923    | 1.000   |
| KSR1      | 101         | 4         | 3.96%         | 196          | 5         | 2.55%         | 0.63 [0.21-1.95]     | 0.505    | 0.805   |
| L3MBTL1   | 101         | 2         | 1.98%         | 196          | 5         | 2.55%         | 1.30 [0.32-5.21]     | 0.759    | 0.996   |
| LACTB2    | 101         | 16        | 15.84%        | 196          | 39        | 19.90%        | 1.32 [0.77-2.26]     | 0.395    | 0.770   |
| LAD1      | 101         | 6         | 5.94%         | 196          | 24        | 12.24%        | 2.21 [1.01-4.82]     | 0.095    | 0.507   |
| LAMA5     | 101         | 6         | 5.94%         | 196          | 10        | 5.10%         | 0.85 [0.36-2.04]     | 0.762    | 0.996   |
| LAMB3     | 101         | 6         | 5.94%         | 196          | 23        | 11.73%        | 2.11 [0.96-4.60]     | 0.118    | 0.526   |
| LAMC1     | 101         | 5         | 4.95%         | 196          | 18        | 9.18%         | 1.94 [0.82-4.58]     | 0.203    | 0.570   |
| LAMC2     | 101         | 5         | 4.95%         | 196          | 19        | 9.69%         | 2.06 [0.88-4.83]     | 0.163    | 0.535   |
| LAMP3     | 101         | 3         | 2.97%         | 196          | 2         | 1.02%         | 0.34 [0.074-1.53]    | 0.237    | 0.599   |
| LAPTM4B   | 101         | 16        | 15.84%        | 196          | 53        | 27.04%        | 1.97 [1.17-3.31]     | 3.23E-02 | 0.507   |
| LASP1     | 101         | 4         | 3.96%         | 196          | 11        | 5.61%         | 1.44 [0.54-3.85]     | 0.540    | 0.837   |
| CERS2     | 101         | 7         | 6.93%         | 196          | 15        | 7.65%         | 1.11 [0.51-2.43]     | 0.822    | 1.000   |
| LAT       | 101         | 6         | 5.94%         | 196          | 3         | 1.53%         | 0.25 [0.076-0.80]    | 0.051    | 0.507   |
| LAX1      | 101         | 7         | 6.93%         | 196          | 28        | 14.29%        | 2.24 [1.08-4.63]     | 0.068    | 0.507   |
| LBP       | 101         | 4         | 3.96%         | 196          | 4         | 2.04%         | 0.51 [0.16-1.65]     | 0.342    | 0.716   |
| LBR       | 101         | 6         | 5.94%         | 196          | 17        | 8.67%         | 1.50 [0.67-3.38]     | 0.407    | 0.774   |
| LCE1A     | 101         | 8         | 7.92%         | 196          | 12        | 6.12%         | 0.76 [0.35-1.65]     | 0.559    | 0.852   |
| LCE1B     | 101         | 8         | 7.92%         | 196          | 12        | 6.12%         | 0.76 [0.35-1.65]     | 0.559    | 0.852   |
| LCE1C     | 101         | 10        | 9.90%         | 196          | 14        | 7.14%         | 0.70 [0.34-1.43]     | 0.411    | 0.774   |
| LCE1D     | 101         | 7         | 6.93%         | 196          | 14        | 7.14%         | 1.03 [0.47-2.28]     | 0.946    | 1.000   |
| LCE1E     | 101         | 10        | 9.90%         | 196          | 12        | 6.12%         | 0.59 [0.28-1.24]     | 0.243    | 0.612   |
| LCE1F     | 101         | 7         | 6.93%         | 196          | 13        | 6.63%         | 0.95 [0.43-2.12]     | 0.923    | 1.000   |
| LCE2A     | 101         | 6         | 5.94%         | 196          | 13        | 6.63%         | 1.12 [0.49-2.60]     | 0.817    | 1.000   |
| LCE2B     | 101         | 7         | 6.93%         | 196          | 13        | 6.63%         | 0.95 [0.43-2.12]     | 0.923    | 1.000   |
| LCE2C     | 101         | 7         | 6.93%         | 196          | 13        | 6.63%         | 0.95 [0.43-2.12]     | 0.923    | 1.000   |
| LCE2D     | 101         | 7         | 6.93%         | 196          | 13        | 6.63%         | 0.95 [0.43-2.12]     | 0.923    | 1.000   |
| LCE3A     | 101         | 7         | 6.93%         | 196          | 13        | 6.63%         | 0.95 [0.43-2.12]     | 0.923    | 1.000   |
| LCE3B     | 101         | 25        | 24.75%        | 196          | 46        | 23.47%        | 0.93 [0.58-1.49]     | 0.806    | 1.000   |

| Symbol      | CINSARC Low |           |               | CINSARC High |           |               | CINSARC High vs. Low |          |         |
|-------------|-------------|-----------|---------------|--------------|-----------|---------------|----------------------|----------|---------|
|             | N tested    | N altered | Fq alteration | N tested     | N altered | Fq alteration | OR [95%CI]           | p-value* | q-value |
| LCE3C       | 101         | 35        | 34.65%        | 196          | 65        | 33.16%        | 0.94 [0.61-1.43]     | 0.797    | 1.000   |
| LCE3D       | 101         | 7         | 6.93%         | 196          | 13        | 6.63%         | 0.95 [0.43-2.12]     | 0.923    | 1.000   |
| LCE3E       | 101         | 7         | 6.93%         | 196          | 13        | 6.63%         | 0.95 [0.43-2.12]     | 0.923    | 1.000   |
| LCE4A       | 101         | 7         | 6.93%         | 196          | 13        | 6.63%         | 0.95 [0.43-2.12]     | 0.923    | 1.000   |
| LCE5A       | 101         | 7         | 6.93%         | 196          | 13        | 6.63%         | 0.95 [0.43-2.12]     | 0.923    | 1.000   |
| LCE6A       | 101         | 7         | 6.93%         | 196          | 11        | 5.61%         | 0.80 [0.35-1.82]     | 0.652    | 0.928   |
| LCMT1       | 101         | 5         | 4.95%         | 196          | 3         | 1.53%         | 0.30 [0.088-1.01]    | 0.103    | 0.507   |
| LDHAL6A     | 101         | 1         | 0.99%         | 196          | 4         | 2.04%         | 2.08 [0.33-13.25]    | 0.514    | 0.805   |
| LDHA        | 101         | 1         | 0.99%         | 196          | 4         | 2.04%         | 2.08 [0.33-13.25]    | 0.514    | 0.805   |
| LDHC        | 101         | 1         | 0.99%         | 196          | 4         | 2.04%         | 2.08 [0.33-13.25]    | 0.514    | 0.805   |
| LEFTY1      | 101         | 6         | 5.94%         | 196          | 19        | 9.69%         | 1.70 [0.77-3.78]     | 0.274    | 0.643   |
| LEFTY2      | 101         | 6         | 5.94%         | 196          | 19        | 9.69%         | 1.70 [0.77-3.78]     | 0.274    | 0.643   |
| LELP1       | 101         | 7         | 6.93%         | 196          | 11        | 5.61%         | 0.80 [0.35-1.82]     | 0.652    | 0.928   |
| LEMD1       | 101         | 7         | 6.93%         | 196          | 26        | 13.27%        | 2.05 [0.99-4.27]     | 0.106    | 0.507   |
| LEMD3       | 101         | 2         | 1.98%         | 196          | 6         | 3.06%         | 1.56 [0.40-6.08]     | 0.589    | 0.869   |
| LENEP       | 101         | 8         | 7.92%         | 196          | 14        | 7.14%         | 0.89 [0.42-1.91]     | 0.808    | 1.000   |
| LETM2       | 101         | 12        | 11.88%        | 196          | 44        | 22.45%        | 2.15 [1.20-3.83]     | 2.99E-02 | 0.507   |
| LGALS3BP    | 101         | 3         | 2.97%         | 196          | 13        | 6.63%         | 2.32 [0.79-6.79]     | 0.197    | 0.570   |
| LGALS8      | 101         | 7         | 6.93%         | 196          | 19        | 9.69%         | 1.44 [0.68-3.07]     | 0.427    | 0.791   |
| LGALS9C     | 101         | 6         | 5.94%         | 196          | 7         | 3.57%         | 0.59 [0.23-1.50]     | 0.349    | 0.722   |
| LGALS9      | 101         | 4         | 3.96%         | 196          | 5         | 2.55%         | 0.63 [0.21-1.95]     | 0.505    | 0.805   |
| LGR5        | 101         | 1         | 0.99%         | 196          | 13        | 6.63%         | 7.10 [1.27-39.64]    | 0.061    | 0.507   |
| LGR6        | 101         | 8         | 7.92%         | 196          | 25        | 12.76%        | 1.70 [0.84-3.43]     | 0.213    | 0.588   |
| LHX1        | 101         | 2         | 1.98%         | 196          | 5         | 2.55%         | 1.30 [0.32-5.21]     | 0.759    | 0.996   |
| LHX4        | 101         | 6         | 5.94%         | 196          | 19        | 9.69%         | 1.70 [0.77-3.78]     | 0.274    | 0.643   |
| LHX9        | 101         | 5         | 4.95%         | 196          | 23        | 11.73%        | 2.55 [1.10-5.90]     | 0.066    | 0.507   |
| LIG3        | 101         | 1         | 0.99%         | 196          | 5         | 2.55%         | 2.62 [0.43-16.05]    | 0.383    | 0.750   |
| LIMD2       | 101         | 8         | 7.92%         | 196          | 30        | 15.31%        | 2.10 [1.06-4.18]     | 0.076    | 0.507   |
| LIME1       | 101         | 7         | 6.93%         | 196          | 15        | 7.65%         | 1.11 [0.51-2.43]     | 0.822    | 1.000   |
| LIN28B      | 101         | 1         | 0.99%         | 196          | 6         | 3.06%         | 3.16 [0.53-18.88]    | 0.290    | 0.650   |
| LIN7A       | 101         | 1         | 0.99%         | 196          | 4         | 2.04%         | 2.08 [0.33-13.25]    | 0.514    | 0.805   |
| LIN9        | 101         | 6         | 5.94%         | 196          | 19        | 9.69%         | 1.70 [0.77-3.78]     | 0.274    | 0.643   |
| LINGO4      | 101         | 6         | 5.94%         | 196          | 12        | 6.12%         | 1.03 [0.44-2.41]     | 0.950    | 1.000   |
| LIPH        | 101         | 3         | 2.97%         | 196          | 2         | 1.02%         | 0.34 [0.074-1.53]    | 0.237    | 0.599   |
| LIPT2       | 101         | 6         | 5.94%         | 196          | 12        | 6.12%         | 1.03 [0.44-2.41]     | 0.950    | 1.000   |
| LITAF       | 101         | 5         | 4.95%         | 196          | 4         | 2.04%         | 0.40 [0.13-1.23]     | 0.179    | 0.535   |
| LIX1L       | 101         | 5         | 4.95%         | 196          | 10        | 5.10%         | 1.03 [0.41-2.60]     | 0.955    | 1.000   |
| LLGL2       | 101         | 5         | 4.95%         | 196          | 12        | 6.12%         | 1.25 [0.51-3.08]     | 0.681    | 0.943   |
| LLPH        | 101         | 2         | 1.98%         | 196          | 8         | 4.08%         | 2.11 [0.56-7.86]     | 0.352    | 0.722   |
| LMAN1       | 101         | 1         | 0.99%         | 196          | 4         | 2.04%         | 2.08 [0.33-13.25]    | 0.514    | 0.805   |
| LMF1        | 101         | 6         | 5.94%         | 196          | 4         | 2.04%         | 0.33 [0.11-0.97]     | 0.092    | 0.507   |
| LMLN        | 101         | 2         | 1.98%         | 196          | 4         | 2.04%         | 1.03 [0.24-4.35]     | 0.972    | 1.000   |
| LMNA        | 101         | 6         | 5.94%         | 196          | 9         | 4.59%         | 0.76 [0.31-1.86]     | 0.616    | 0.898   |
| LMOD1       | 101         | 7         | 6.93%         | 196          | 24        | 12.24%        | 1.87 [0.90-3.92]     | 0.161    | 0.535   |
| LMX1A       | 101         | 4         | 3.96%         | 196          | 13        | 6.63%         | 1.72 [0.66-4.51]     | 0.353    | 0.722   |
| LOC10012678 | 101         | 1         | 0.99%         | 196          | 4         | 2.04%         | 2.08 [0.33-13.25]    | 0.514    | 0.805   |
| LOC10013098 | 101         | 10        | 9.90%         | 196          | 17        | 8.67%         | 0.86 [0.43-1.72]     | 0.728    | 0.986   |
| LOC10013149 | 101         | 4         | 3.96%         | 196          | 8         | 4.08%         | 1.03 [0.37-2.88]     | 0.960    | 1.000   |
| LOC10013436 | 101         | 7         | 6.93%         | 196          | 4         | 2.04%         | 0.28 [0.098-0.80]    | 4.63E-02 | 0.507   |
| LOC10019098 | 101         | 6         | 5.94%         | 196          | 2         | 1.02%         | 0.16 [0.042-0.64]    | 2.82E-02 | 0.507   |
| LOC148696   | 101         | 7         | 6.93%         | 196          | 25        | 12.76%        | 1.96 [0.94-4.09]     | 0.131    | 0.535   |
| LOC154761   | 101         | 4         | 3.96%         | 196          | 5         | 2.55%         | 0.63 [0.21-1.95]     | 0.505    | 0.805   |
| LOC220729   | 101         | 3         | 2.97%         | 196          | 4         | 2.04%         | 0.68 [0.19-2.43]     | 0.619    | 0.898   |
| LOC388242   | 101         | 4         | 3.96%         | 196          | 3         | 1.53%         | 0.38 [0.11-1.35]     | 0.207    | 0.573   |
| LOC391322   | 101         | 4         | 3.96%         | 196          | 8         | 4.08%         | 1.03 [0.37-2.88]     | 0.960    | 1.000   |
| LOC401463   | 101         | 14        | 13.86%        | 196          | 35        | 17.86%        | 1.35 [0.77-2.38]     | 0.381    | 0.750   |
| LOC441204   | 101         | 0         | 0.00%         | 196          | 6         | 3.06%         | 2.7e+07 [0e+00-Inf]  | 0.992    | 1.000   |
| LOC606724   | 101         | 4         | 3.96%         | 196          | 3         | 1.53%         | 0.38 [0.11-1.35]     | 0.207    | 0.573   |
| LOC646214   | 101         | 1         | 0.99%         | 196          | 4         | 2.04%         | 2.08 [0.33-13.25]    | 0.514    | 0.805   |
| LOC646762   | 101         | 0         | 0.00%         | 196          | 6         | 3.06%         | 2.7e+07 [0e+00-Inf]  | 0.992    | 1.000   |
| LOC652276   | 101         | 9         | 8.91%         | 196          | 5         | 2.55%         | 0.27 [0.10-0.69]     | 2.12E-02 | 0.507   |
| LOC653653   | 101         | 7         | 6.93%         | 196          | 33        | 16.84%        | 2.72 [1.33-5.57]     | 2.17E-02 | 0.507   |
| LOC728024   | 101         | 11        | 10.89%        | 196          | 53        | 27.04%        | 3.03 [1.68-5.46]     | 1.92E-03 | 0.507   |
| LOC728989   | 101         | 6         | 5.94%         | 196          | 12        | 6.12%         | 1.03 [0.44-2.41]     | 0.950    | 1.000   |
| LOR         | 101         | 7         | 6.93%         | 196          | 12        | 6.12%         | 0.88 [0.39-1.97]     | 0.788    | 0.996   |
| LPGAT1      | 101         | 6         | 5.94%         | 196          | 20        | 10.20%        | 1.80 [0.81-3.98]     | 0.224    | 0.596   |
| LPIN3       | 101         | 2         | 1.98%         | 196          | 4         | 2.04%         | 1.03 [0.24-4.35]     | 0.972    | 1.000   |
| LPO         | 101         | 6         | 5.94%         | 196          | 26        | 13.27%        | 2.42 [1.12-5.25]     | 0.060    | 0.507   |
| LPP         | 101         | 2         | 1.98%         | 196          | 3         | 1.53%         | 0.77 [0.17-3.50]     | 0.776    | 0.996   |
| LRCH3       | 101         | 3         | 2.97%         | 196          | 4         | 2.04%         | 0.68 [0.19-2.43]     | 0.619    | 0.898   |
| LRFN4       | 101         | 8         | 7.92%         | 196          | 14        | 7.14%         | 0.89 [0.42-1.91]     | 0.808    | 1.000   |

| Symbol          | CINSARC Low |           |               | CINSARC High |           |               | CINSARC High vs. Low |          |         |
|-----------------|-------------|-----------|---------------|--------------|-----------|---------------|----------------------|----------|---------|
|                 | N tested    | N altered | Fq alteration | N tested     | N altered | Fq alteration | OR [95%CI]           | p-value* | q-value |
| <i>LRP12</i>    | 101         | 17        | 16.83%        | 196          | 52        | 26.53%        | 1.78 [1.07-2.98]     | 0.063    | 0.507   |
| <i>LRP5</i>     | 101         | 6         | 5.94%         | 196          | 19        | 9.69%         | 1.70 [0.77-3.78]     | 0.274    | 0.643   |
| <i>LRRC10B</i>  | 101         | 1         | 0.99%         | 196          | 5         | 2.55%         | 2.62 [0.43-16.05]    | 0.383    | 0.750   |
| <i>LRRC10</i>   | 101         | 2         | 1.98%         | 196          | 16        | 8.16%         | 4.40 [1.26-15.37]    | 0.051    | 0.507   |
| <i>LRRC14</i>   | 101         | 18        | 17.82%        | 196          | 49        | 25.00%        | 1.54 [0.93-2.55]     | 0.163    | 0.535   |
| <i>LRRC15</i>   | 101         | 3         | 2.97%         | 196          | 3         | 1.53%         | 0.51 [0.13-1.98]     | 0.412    | 0.774   |
| <i>LRRC24</i>   | 101         | 18        | 17.82%        | 196          | 49        | 25.00%        | 1.54 [0.93-2.55]     | 0.163    | 0.535   |
| <i>LRRC28</i>   | 101         | 1         | 0.99%         | 196          | 7         | 3.57%         | 3.70 [0.63-21.75]    | 0.224    | 0.596   |
| <i>LRRC32</i>   | 101         | 6         | 5.94%         | 196          | 17        | 8.67%         | 1.50 [0.67-3.38]     | 0.407    | 0.774   |
| <i>NRROS</i>    | 101         | 3         | 2.97%         | 196          | 4         | 2.04%         | 0.68 [0.19-2.43]     | 0.619    | 0.898   |
| <i>LRRC37A2</i> | 101         | 11        | 10.89%        | 196          | 16        | 8.16%         | 0.73 [0.37-1.43]     | 0.440    | 0.800   |
| <i>LRRC37A3</i> | 101         | 7         | 6.93%         | 196          | 21        | 10.71%        | 1.61 [0.76-3.40]     | 0.294    | 0.650   |
| <i>LRRC37A</i>  | 101         | 8         | 7.92%         | 196          | 9         | 4.59%         | 0.56 [0.24-1.28]     | 0.248    | 0.623   |
| <i>LRRC45</i>   | 101         | 2         | 1.98%         | 196          | 13        | 6.63%         | 3.52 [0.99-12.47]    | 0.102    | 0.507   |
| <i>LRRC46</i>   | 101         | 1         | 0.99%         | 196          | 10        | 5.10%         | 5.38 [0.95-30.54]    | 0.111    | 0.511   |
| <i>LRRC52</i>   | 101         | 4         | 3.96%         | 196          | 12        | 6.12%         | 1.58 [0.60-4.18]     | 0.438    | 0.798   |
| <i>LRRC59</i>   | 101         | 4         | 3.96%         | 196          | 19        | 9.69%         | 2.60 [1.03-6.59]     | 0.090    | 0.507   |
| <i>PPP1R42</i>  | 101         | 15        | 14.85%        | 196          | 40        | 20.41%        | 1.47 [0.85-2.53]     | 0.245    | 0.616   |
| <i>LRRC69</i>   | 101         | 18        | 17.82%        | 196          | 46        | 23.47%        | 1.41 [0.85-2.35]     | 0.263    | 0.643   |
| <i>LRRC6</i>    | 101         | 15        | 14.85%        | 196          | 56        | 28.57%        | 2.29 [1.35-3.89]     | 9.81E-03 | 0.507   |
| <i>LRRCC1</i>   | 101         | 17        | 16.83%        | 196          | 47        | 23.98%        | 1.56 [0.93-2.61]     | 0.158    | 0.535   |
| <i>LRRN2</i>    | 101         | 7         | 6.93%         | 196          | 26        | 13.27%        | 2.05 [0.99-4.27]     | 0.106    | 0.507   |
| <i>LRTOMT</i>   | 101         | 5         | 4.95%         | 196          | 6         | 3.06%         | 0.61 [0.22-1.68]     | 0.418    | 0.779   |
| <i>LSG1</i>     | 101         | 3         | 2.97%         | 196          | 3         | 1.53%         | 0.51 [0.13-1.98]     | 0.412    | 0.774   |
| <i>LSM14B</i>   | 101         | 6         | 5.94%         | 196          | 12        | 6.12%         | 1.03 [0.44-2.41]     | 0.950    | 1.000   |
| <i>LSM1</i>     | 101         | 11        | 10.89%        | 196          | 47        | 23.98%        | 2.58 [1.43-4.67]     | 8.55E-03 | 0.507   |
| <i>LSM5</i>     | 101         | 0         | 0.00%         | 196          | 7         | 3.57%         | 3.2e+07 [0e+00-Inf]  | 0.992    | 1.000   |
| <i>LUC7L3</i>   | 101         | 4         | 3.96%         | 196          | 20        | 10.20%        | 2.76 [1.09-6.95]     | 0.071    | 0.507   |
| <i>LUC7L</i>    | 101         | 7         | 6.93%         | 196          | 4         | 2.04%         | 0.28 [0.098-0.80]    | 4.63E-02 | 0.507   |
| <i>LUM</i>      | 101         | 0         | 0.00%         | 196          | 5         | 2.55%         | 2.2e+07 [0e+00-Inf]  | 0.992    | 1.000   |
| <i>LY6D</i>     | 101         | 17        | 16.83%        | 196          | 49        | 25.00%        | 1.65 [0.98-2.76]     | 0.111    | 0.511   |
| <i>LY6E</i>     | 101         | 16        | 15.84%        | 196          | 49        | 25.00%        | 1.77 [1.05-2.99]     | 0.073    | 0.507   |
| <i>LY6H</i>     | 101         | 15        | 14.85%        | 196          | 50        | 25.51%        | 1.96 [1.15-3.35]     | 3.75E-02 | 0.507   |
| <i>LY6K</i>     | 101         | 16        | 15.84%        | 196          | 49        | 25.00%        | 1.77 [1.05-2.99]     | 0.073    | 0.507   |
| <i>LY96</i>     | 101         | 17        | 16.83%        | 196          | 41        | 20.92%        | 1.31 [0.77-2.21]     | 0.401    | 0.774   |
| <i>LY9</i>      | 101         | 6         | 5.94%         | 196          | 16        | 8.16%         | 1.41 [0.62-3.18]     | 0.490    | 0.805   |
| <i>LYNX1</i>    | 101         | 17        | 16.83%        | 196          | 49        | 25.00%        | 1.65 [0.98-2.76]     | 0.111    | 0.511   |
| <i>LYN</i>      | 101         | 14        | 13.86%        | 196          | 31        | 15.82%        | 1.17 [0.66-2.07]     | 0.656    | 0.931   |
| <i>LYPD2</i>    | 101         | 16        | 15.84%        | 196          | 49        | 25.00%        | 1.77 [1.05-2.99]     | 0.073    | 0.507   |
| <i>LYPLA1</i>   | 101         | 12        | 11.88%        | 196          | 30        | 15.31%        | 1.34 [0.73-2.45]     | 0.423    | 0.787   |
| <i>LYPLA1</i>   | 101         | 6         | 5.94%         | 196          | 20        | 10.20%        | 1.80 [0.81-3.98]     | 0.224    | 0.596   |
| <i>LYRM1</i>    | 101         | 5         | 4.95%         | 196          | 2         | 1.02%         | 0.20 [0.049-0.80]    | 0.056    | 0.507   |
| <i>LYSMD1</i>   | 101         | 7         | 6.93%         | 196          | 13        | 6.63%         | 0.95 [0.43-2.12]     | 0.923    | 1.000   |
| <i>LYSMD4</i>   | 101         | 1         | 0.99%         | 196          | 6         | 3.06%         | 3.16 [0.53-18.88]    | 0.290    | 0.650   |
| <i>LYST</i>     | 101         | 7         | 6.93%         | 196          | 20        | 10.20%        | 1.53 [0.72-3.24]     | 0.355    | 0.722   |
| <i>LYZL6</i>    | 101         | 2         | 1.98%         | 196          | 4         | 2.04%         | 1.03 [0.24-4.35]     | 0.972    | 1.000   |
| <i>LYZ</i>      | 101         | 3         | 2.97%         | 196          | 18        | 9.18%         | 3.30 [1.16-9.41]     | 0.060    | 0.507   |
| <i>MAEL</i>     | 101         | 5         | 4.95%         | 196          | 13        | 6.63%         | 1.36 [0.56-3.32]     | 0.566    | 0.852   |
| <i>MAF1</i>     | 101         | 17        | 16.83%        | 196          | 51        | 26.02%        | 1.74 [1.04-2.90]     | 0.076    | 0.507   |
| <i>MAFA</i>     | 101         | 17        | 16.83%        | 196          | 51        | 26.02%        | 1.74 [1.04-2.90]     | 0.076    | 0.507   |
| <i>MAFB</i>     | 101         | 3         | 2.97%         | 196          | 6         | 3.06%         | 1.03 [0.32-3.36]     | 0.965    | 1.000   |
| <i>MAFG</i>     | 101         | 2         | 1.98%         | 196          | 13        | 6.63%         | 3.52 [0.99-12.47]    | 0.102    | 0.507   |
| <i>MAGEF1</i>   | 101         | 3         | 2.97%         | 196          | 3         | 1.53%         | 0.51 [0.13-1.98]     | 0.412    | 0.774   |
| <i>MAK16</i>    | 101         | 4         | 3.96%         | 196          | 10        | 5.10%         | 1.30 [0.48-3.53]     | 0.661    | 0.935   |
| <i>MAL2</i>     | 101         | 15        | 14.85%        | 196          | 59        | 30.10%        | 2.47 [1.46-4.18]     | 4.76E-03 | 0.507   |
| <i>MALT1</i>    | 101         | 1         | 0.99%         | 196          | 4         | 2.04%         | 2.08 [0.33-13.25]    | 0.514    | 0.805   |
| <i>MAN2A2</i>   | 101         | 1         | 0.99%         | 196          | 4         | 2.04%         | 2.08 [0.33-13.25]    | 0.514    | 0.805   |
| <i>MANBAL</i>   | 101         | 5         | 4.95%         | 196          | 3         | 1.53%         | 0.30 [0.088-1.01]    | 0.103    | 0.507   |
| <i>MAP1LC3A</i> | 101         | 3         | 2.97%         | 196          | 4         | 2.04%         | 0.68 [0.19-2.43]     | 0.619    | 0.898   |
| <i>MAP1LC3C</i> | 101         | 5         | 4.95%         | 196          | 19        | 9.69%         | 2.06 [0.88-4.83]     | 0.163    | 0.535   |
| <i>MAP2K4</i>   | 101         | 0         | 0.00%         | 196          | 1         | 0.51%         | 3.2e+07 [0e+00-Inf]  | 0.997    | 1.000   |
| <i>MAP2K6</i>   | 101         | 5         | 4.95%         | 196          | 22        | 11.22%        | 2.43 [1.05-5.63]     | 0.083    | 0.507   |
| <i>MAP3K13</i>  | 101         | 3         | 2.97%         | 196          | 3         | 1.53%         | 0.51 [0.13-1.98]     | 0.412    | 0.774   |
| <i>MAP3K3</i>   | 101         | 8         | 7.92%         | 196          | 30        | 15.31%        | 2.10 [1.06-4.18]     | 0.076    | 0.507   |
| <i>MAP6D1</i>   | 101         | 3         | 2.97%         | 196          | 2         | 1.02%         | 0.34 [0.074-1.53]    | 0.237    | 0.599   |
| <i>MAP6</i>     | 101         | 5         | 4.95%         | 196          | 20        | 10.20%        | 2.18 [0.93-5.10]     | 0.130    | 0.535   |
| <i>MAPK15</i>   | 101         | 17        | 16.83%        | 196          | 50        | 25.51%        | 1.69 [1.01-2.83]     | 0.092    | 0.507   |
| <i>MAPK3</i>    | 101         | 5         | 4.95%         | 196          | 4         | 2.04%         | 0.40 [0.13-1.23]     | 0.179    | 0.535   |
| <i>MAPK7</i>    | 101         | 4         | 3.96%         | 196          | 2         | 1.02%         | 0.25 [0.059-1.05]    | 0.113    | 0.511   |
| <i>MAPK8IP3</i> | 101         | 6         | 5.94%         | 196          | 5         | 2.55%         | 0.41 [0.15-1.15]     | 0.154    | 0.535   |
| <i>MAPKAPK2</i> | 101         | 6         | 5.94%         | 196          | 25        | 12.76%        | 2.31 [1.06-5.03]     | 0.076    | 0.507   |

| Symbol   | CINSARC Low |           |               | CINSARC High |           |               | CINSARC High vs. Low |          |         |
|----------|-------------|-----------|---------------|--------------|-----------|---------------|----------------------|----------|---------|
|          | N tested    | N altered | Fq alteration | N tested     | N altered | Fq alteration | OR [95%CI]           | p-value* | q-value |
| MARCH10  | 101         | 8         | 7.92%         | 196          | 31        | 15.82%        | 2.18 [1.10-4.34]     | 0.061    | 0.507   |
| MARCH9   | 101         | 0         | 0.00%         | 196          | 5         | 2.55%         | 2.2e+07 [0e+00-Inf]  | 0.992    | 1.000   |
| MARK1    | 101         | 6         | 5.94%         | 196          | 18        | 9.18%         | 1.60 [0.72-3.57]     | 0.335    | 0.716   |
| MATN2    | 101         | 16        | 15.84%        | 196          | 54        | 27.55%        | 2.02 [1.20-3.40]     | 2.60E-02 | 0.507   |
| MATN4    | 101         | 5         | 4.95%         | 196          | 3         | 1.53%         | 0.30 [0.088-1.01]    | 0.103    | 0.507   |
| MAZ      | 101         | 5         | 4.95%         | 196          | 3         | 1.53%         | 0.30 [0.088-1.01]    | 0.103    | 0.507   |
| MBIP     | 101         | 0         | 0.00%         | 196          | 9         | 4.59%         | 4.1e+07 [0e+00-Inf]  | 0.992    | 1.000   |
| MBTD1    | 101         | 4         | 3.96%         | 196          | 18        | 9.18%         | 2.45 [0.97-6.23]     | 0.114    | 0.512   |
| MC3R     | 101         | 8         | 7.92%         | 196          | 12        | 6.12%         | 0.76 [0.35-1.65]     | 0.559    | 0.852   |
| MCCC1    | 101         | 3         | 2.97%         | 196          | 2         | 1.02%         | 0.34 [0.074-1.53]    | 0.237    | 0.599   |
| MCF2L2   | 101         | 3         | 2.97%         | 196          | 2         | 1.02%         | 0.34 [0.074-1.53]    | 0.237    | 0.599   |
| MCL1     | 101         | 9         | 8.91%         | 196          | 16        | 8.16%         | 0.91 [0.44-1.86]     | 0.826    | 1.000   |
| MCM4     | 101         | 14        | 13.86%        | 196          | 27        | 13.78%        | 0.99 [0.55-1.78]     | 0.984    | 1.000   |
| MCTP2    | 101         | 0         | 0.00%         | 196          | 5         | 2.55%         | 2.2e+07 [0e+00-Inf]  | 0.992    | 1.000   |
| MDM1     | 101         | 2         | 1.98%         | 196          | 15        | 7.65%         | 4.10 [1.17-14.39]    | 0.064    | 0.507   |
| MDM2     | 101         | 2         | 1.98%         | 196          | 17        | 8.67%         | 4.70 [1.35-16.35]    | 4.11E-02 | 0.507   |
| MDM4     | 101         | 7         | 6.93%         | 196          | 27        | 13.78%        | 2.15 [1.03-4.45]     | 0.085    | 0.507   |
| MED13    | 101         | 9         | 8.91%         | 196          | 33        | 16.84%        | 2.07 [1.08-3.98]     | 0.068    | 0.507   |
| MED1     | 101         | 5         | 4.95%         | 196          | 12        | 6.12%         | 1.25 [0.51-3.08]     | 0.681    | 0.943   |
| MED24    | 101         | 5         | 4.95%         | 196          | 11        | 5.61%         | 1.14 [0.46-2.84]     | 0.811    | 1.000   |
| MED30    | 101         | 15        | 14.85%        | 196          | 56        | 28.57%        | 2.29 [1.35-3.89]     | 9.81E-03 | 0.507   |
| MEF2A    | 101         | 1         | 0.99%         | 196          | 6         | 3.06%         | 3.16 [0.53-18.88]    | 0.290    | 0.650   |
| MEF2D    | 101         | 6         | 5.94%         | 196          | 9         | 4.59%         | 0.76 [0.31-1.86]     | 0.616    | 0.898   |
| MEFV     | 101         | 5         | 4.95%         | 196          | 4         | 2.04%         | 0.40 [0.13-1.23]     | 0.179    | 0.535   |
| MESP1    | 101         | 1         | 0.99%         | 196          | 8         | 4.08%         | 4.26 [0.73-24.65]    | 0.175    | 0.535   |
| MESP2    | 101         | 1         | 0.99%         | 196          | 8         | 4.08%         | 4.26 [0.73-24.65]    | 0.175    | 0.535   |
| METRNL   | 101         | 3         | 2.97%         | 196          | 15        | 7.65%         | 2.71 [0.94-7.82]     | 0.122    | 0.534   |
| METRNL   | 101         | 6         | 5.94%         | 196          | 4         | 2.04%         | 0.33 [0.11-0.97]     | 0.092    | 0.507   |
| METTL11B | 101         | 5         | 4.95%         | 196          | 13        | 6.63%         | 1.36 [0.56-3.32]     | 0.566    | 0.852   |
| METTL1   | 101         | 0         | 0.00%         | 196          | 5         | 2.55%         | 2.2e+07 [0e+00-Inf]  | 0.992    | 1.000   |
| METTL2A  | 101         | 9         | 8.91%         | 196          | 34        | 17.35%        | 2.15 [1.12-4.12]     | 0.055    | 0.507   |
| METTL9   | 101         | 6         | 5.94%         | 196          | 2         | 1.02%         | 0.16 [0.042-0.64]    | 2.82E-02 | 0.507   |
| MEX3A    | 101         | 6         | 5.94%         | 196          | 9         | 4.59%         | 0.76 [0.31-1.86]     | 0.616    | 0.898   |
| MFAP4    | 101         | 4         | 3.96%         | 196          | 2         | 1.02%         | 0.25 [0.059-1.05]    | 0.113    | 0.511   |
| MFG8     | 101         | 1         | 0.99%         | 196          | 5         | 2.55%         | 2.62 [0.43-16.05]    | 0.383    | 0.750   |
| MFN1     | 101         | 4         | 3.96%         | 196          | 2         | 1.02%         | 0.25 [0.059-1.05]    | 0.113    | 0.511   |
| MFS11    | 101         | 3         | 2.97%         | 196          | 13        | 6.63%         | 2.32 [0.79-6.79]     | 0.197    | 0.570   |
| MFS3     | 101         | 17        | 16.83%        | 196          | 49        | 25.00%        | 1.65 [0.98-2.76]     | 0.111    | 0.511   |
| MGAT5B   | 101         | 3         | 2.97%         | 196          | 13        | 6.63%         | 2.32 [0.79-6.79]     | 0.197    | 0.570   |
| MGC16275 | 101         | 6         | 5.94%         | 196          | 15        | 7.65%         | 1.31 [0.58-2.98]     | 0.586    | 0.869   |
| MGC2889  | 101         | 3         | 2.97%         | 196          | 3         | 1.53%         | 0.51 [0.13-1.98]     | 0.412    | 0.774   |
| MGRN1    | 101         | 5         | 4.95%         | 196          | 6         | 3.06%         | 0.61 [0.22-1.68]     | 0.418    | 0.779   |
| MGST3    | 101         | 4         | 3.96%         | 196          | 12        | 6.12%         | 1.58 [0.60-4.18]     | 0.438    | 0.798   |
| MIA3     | 101         | 6         | 5.94%         | 196          | 19        | 9.69%         | 1.70 [0.77-3.78]     | 0.274    | 0.643   |
| MIF4G    | 101         | 5         | 4.95%         | 196          | 12        | 6.12%         | 1.25 [0.51-3.08]     | 0.681    | 0.943   |
| MIPOL1   | 101         | 0         | 0.00%         | 196          | 11        | 5.61%         | 5.1e+07 [0e+00-Inf]  | 0.992    | 1.000   |
| MIXL1    | 101         | 6         | 5.94%         | 196          | 19        | 9.69%         | 1.70 [0.77-3.78]     | 0.274    | 0.643   |
| MKRN1    | 101         | 1         | 0.99%         | 196          | 4         | 2.04%         | 2.08 [0.33-13.25]    | 0.514    | 0.805   |
| MKS1     | 101         | 6         | 5.94%         | 196          | 26        | 13.27%        | 2.42 [1.12-5.25]     | 0.060    | 0.507   |
| MLLT11   | 101         | 7         | 6.93%         | 196          | 14        | 7.14%         | 1.03 [0.47-2.28]     | 0.946    | 1.000   |
| MLLT6    | 101         | 5         | 4.95%         | 196          | 9         | 4.59%         | 0.92 [0.36-2.37]     | 0.890    | 1.000   |
| MLST8    | 101         | 6         | 5.94%         | 196          | 5         | 2.55%         | 0.41 [0.15-1.15]     | 0.154    | 0.535   |
| MMD      | 101         | 8         | 7.92%         | 196          | 20        | 10.20%        | 1.32 [0.64-2.71]     | 0.525    | 0.818   |
| MMP16    | 101         | 17        | 16.83%        | 196          | 50        | 25.51%        | 1.69 [1.01-2.83]     | 0.092    | 0.507   |
| MMP24    | 101         | 4         | 3.96%         | 196          | 6         | 3.06%         | 0.77 [0.26-2.26]     | 0.685    | 0.943   |
| MMP25    | 101         | 6         | 5.94%         | 196          | 4         | 2.04%         | 0.33 [0.11-0.97]     | 0.092    | 0.507   |
| MMP28    | 101         | 2         | 1.98%         | 196          | 4         | 2.04%         | 1.03 [0.24-4.35]     | 0.972    | 1.000   |
| MMP9     | 101         | 5         | 4.95%         | 196          | 4         | 2.04%         | 0.40 [0.13-1.23]     | 0.179    | 0.535   |
| MNDA     | 101         | 6         | 5.94%         | 196          | 8         | 4.08%         | 0.67 [0.27-1.68]     | 0.476    | 0.805   |
| MOCS3    | 101         | 6         | 5.94%         | 196          | 14        | 7.14%         | 1.22 [0.53-2.79]     | 0.696    | 0.951   |
| MOGAT2   | 101         | 6         | 5.94%         | 196          | 20        | 10.20%        | 1.80 [0.81-3.98]     | 0.224    | 0.596   |
| MON2     | 101         | 1         | 0.99%         | 196          | 6         | 3.06%         | 3.16 [0.53-18.88]    | 0.290    | 0.650   |
| MARC1    | 101         | 6         | 5.94%         | 196          | 18        | 9.18%         | 1.60 [0.72-3.57]     | 0.335    | 0.716   |
| MARC2    | 101         | 6         | 5.94%         | 196          | 18        | 9.18%         | 1.60 [0.72-3.57]     | 0.335    | 0.716   |
| MOS      | 101         | 14        | 13.86%        | 196          | 31        | 15.82%        | 1.17 [0.66-2.07]     | 0.656    | 0.931   |
| MPG      | 101         | 7         | 6.93%         | 196          | 4         | 2.04%         | 0.28 [0.098-0.80]    | 4.63E-02 | 0.507   |
| MPO      | 101         | 6         | 5.94%         | 196          | 26        | 13.27%        | 2.42 [1.12-5.25]     | 0.060    | 0.507   |
| MPP6     | 101         | 0         | 0.00%         | 196          | 6         | 3.06%         | 2.7e+07 [0e+00-Inf]  | 0.992    | 1.000   |
| MPV17L   | 101         | 7         | 6.93%         | 196          | 3         | 1.53%         | 0.21 [0.066-0.66]    | 2.55E-02 | 0.507   |
| MPZL1    | 101         | 5         | 4.95%         | 196          | 12        | 6.12%         | 1.25 [0.51-3.08]     | 0.681    | 0.943   |
| MPZ      | 101         | 6         | 5.94%         | 196          | 16        | 8.16%         | 1.41 [0.62-3.18]     | 0.490    | 0.805   |

| Symbol  | CINSARC Low |           |               | CINSARC High |           |               | CINSARC High vs. Low |          |         |
|---------|-------------|-----------|---------------|--------------|-----------|---------------|----------------------|----------|---------|
|         | N tested    | N altered | Fq alteration | N tested     | N altered | Fq alteration | OR [95%CI]           | p-value* | q-value |
| MR1     | 101         | 5         | 4.95%         | 196          | 19        | 9.69%         | 2.06 [0.88-4.83]     | 0.163    | 0.535   |
| MRC2    | 101         | 8         | 7.92%         | 196          | 34        | 17.35%        | 2.44 [1.23-4.82]     | 3.12E-02 | 0.507   |
| MRGPRD  | 101         | 16        | 15.84%        | 196          | 39        | 19.90%        | 1.32 [0.77-2.26]     | 0.395    | 0.770   |
| MRGPRF  | 101         | 16        | 15.84%        | 196          | 43        | 21.94%        | 1.49 [0.88-2.54]     | 0.214    | 0.591   |
| MRGPRX1 | 101         | 10        | 9.90%         | 196          | 7         | 3.57%         | 0.34 [0.15-0.78]     | 3.26E-02 | 0.507   |
| MRM1    | 101         | 3         | 2.97%         | 196          | 5         | 2.55%         | 0.86 [0.25-2.89]     | 0.833    | 1.000   |
| MRPL10  | 101         | 1         | 0.99%         | 196          | 10        | 5.10%         | 5.38 [0.95-30.54]    | 0.111    | 0.511   |
| MRPL11  | 101         | 5         | 4.95%         | 196          | 10        | 5.10%         | 1.03 [0.41-2.60]     | 0.955    | 1.000   |
| MRPL12  | 101         | 2         | 1.98%         | 196          | 12        | 6.12%         | 3.23 [0.90-11.53]    | 0.130    | 0.535   |
| MRPL13  | 101         | 15        | 14.85%        | 196          | 53        | 27.04%        | 2.12 [1.25-3.61]     | 1.95E-02 | 0.507   |
| MRPL15  | 101         | 12        | 11.88%        | 196          | 30        | 15.31%        | 1.34 [0.73-2.45]     | 0.423    | 0.787   |
| MRPL21  | 101         | 15        | 14.85%        | 196          | 38        | 19.39%        | 1.38 [0.80-2.38]     | 0.335    | 0.716   |
| MRPL24  | 101         | 7         | 6.93%         | 196          | 8         | 4.08%         | 0.57 [0.24-1.37]     | 0.294    | 0.650   |
| MRPL27  | 101         | 4         | 3.96%         | 196          | 18        | 9.18%         | 2.45 [0.97-6.23]     | 0.114    | 0.512   |
| MRPL28  | 101         | 7         | 6.93%         | 196          | 4         | 2.04%         | 0.28 [0.098-0.80]    | 4.63E-02 | 0.507   |
| MRPL38  | 101         | 4         | 3.96%         | 196          | 12        | 6.12%         | 1.58 [0.60-4.18]     | 0.438    | 0.798   |
| MRPL45  | 101         | 4         | 3.96%         | 196          | 8         | 4.08%         | 1.03 [0.37-2.88]     | 0.960    | 1.000   |
| MRPL46  | 101         | 0         | 0.00%         | 196          | 6         | 3.06%         | 2.7e+07 [0e+00-inf]  | 0.992    | 1.000   |
| MRPL47  | 101         | 4         | 3.96%         | 196          | 2         | 1.02%         | 0.25 [0.059-1.05]    | 0.113    | 0.511   |
| MRPL48  | 101         | 6         | 5.94%         | 196          | 11        | 5.61%         | 0.94 [0.40-2.23]     | 0.908    | 1.000   |
| MRPL55  | 101         | 6         | 5.94%         | 196          | 21        | 10.71%        | 1.90 [0.86-4.19]     | 0.181    | 0.535   |
| MRPL9   | 101         | 6         | 5.94%         | 196          | 12        | 6.12%         | 1.03 [0.44-2.41]     | 0.950    | 1.000   |
| MRPS11  | 101         | 0         | 0.00%         | 196          | 6         | 3.06%         | 2.7e+07 [0e+00-inf]  | 0.992    | 1.000   |
| MRPS14  | 101         | 5         | 4.95%         | 196          | 16        | 8.16%         | 1.71 [0.72-4.07]     | 0.311    | 0.680   |
| MRPS16  | 101         | 0         | 0.00%         | 196          | 5         | 2.55%         | 2.2e+07 [0e+00-inf]  | 0.992    | 1.000   |
| MRPS21  | 101         | 8         | 7.92%         | 196          | 15        | 7.65%         | 0.96 [0.46-2.04]     | 0.935    | 1.000   |
| MRPS23  | 101         | 6         | 5.94%         | 196          | 26        | 13.27%        | 2.42 [1.12-5.25]     | 0.060    | 0.507   |
| MRPS28  | 101         | 17        | 16.83%        | 196          | 48        | 24.49%        | 1.60 [0.96-2.68]     | 0.133    | 0.535   |
| MRPS34  | 101         | 6         | 5.94%         | 196          | 5         | 2.55%         | 0.41 [0.15-1.15]     | 0.154    | 0.535   |
| MRPS7   | 101         | 5         | 4.95%         | 196          | 12        | 6.12%         | 1.25 [0.51-3.08]     | 0.681    | 0.943   |
| MRS2P2  | 101         | 2         | 1.98%         | 196          | 12        | 6.12%         | 3.23 [0.90-11.53]    | 0.130    | 0.535   |
| MSC     | 101         | 15        | 14.85%        | 196          | 42        | 21.43%        | 1.56 [0.91-2.69]     | 0.175    | 0.535   |
| MSI2    | 101         | 7         | 6.93%         | 196          | 28        | 14.29%        | 2.24 [1.08-4.63]     | 0.068    | 0.507   |
| MSL1    | 101         | 5         | 4.95%         | 196          | 9         | 4.59%         | 0.92 [0.36-2.37]     | 0.890    | 1.000   |
| MSLN    | 101         | 6         | 5.94%         | 196          | 4         | 2.04%         | 0.33 [0.11-0.97]     | 0.092    | 0.507   |
| MSRB3   | 101         | 2         | 1.98%         | 196          | 7         | 3.57%         | 1.83 [0.48-6.96]     | 0.455    | 0.805   |
| MSTO1   | 101         | 6         | 5.94%         | 196          | 10        | 5.10%         | 0.85 [0.36-2.04]     | 0.762    | 0.996   |
| MSTO2P  | 101         | 6         | 5.94%         | 196          | 10        | 5.10%         | 0.85 [0.36-2.04]     | 0.762    | 0.996   |
| MSX2P1  | 101         | 6         | 5.94%         | 196          | 24        | 12.24%        | 2.21 [1.01-4.82]     | 0.095    | 0.507   |
| MTBP    | 101         | 15        | 14.85%        | 196          | 53        | 27.04%        | 2.12 [1.25-3.61]     | 1.95E-02 | 0.507   |
| MTDH    | 101         | 16        | 15.84%        | 196          | 53        | 27.04%        | 1.97 [1.17-3.31]     | 3.23E-02 | 0.507   |
| MTFR1   | 101         | 15        | 14.85%        | 196          | 37        | 18.88%        | 1.33 [0.77-2.31]     | 0.388    | 0.757   |
| MTHFD2L | 101         | 2         | 1.98%         | 196          | 3         | 1.53%         | 0.77 [0.17-3.50]     | 0.776    | 0.996   |
| MTMR11  | 101         | 7         | 6.93%         | 196          | 14        | 7.14%         | 1.03 [0.47-2.28]     | 0.946    | 1.000   |
| MTMR4   | 101         | 7         | 6.93%         | 196          | 28        | 14.29%        | 2.24 [1.08-4.63]     | 0.068    | 0.507   |
| MTR     | 101         | 6         | 5.94%         | 196          | 19        | 9.69%         | 1.70 [0.77-3.78]     | 0.274    | 0.643   |
| MTSS1   | 101         | 16        | 15.84%        | 196          | 59        | 30.10%        | 2.29 [1.37-3.83]     | 8.37E-03 | 0.507   |
| MTVR2   | 101         | 7         | 6.93%         | 196          | 23        | 11.73%        | 1.79 [0.85-3.74]     | 0.198    | 0.570   |
| MTX1    | 101         | 8         | 7.92%         | 196          | 14        | 7.14%         | 0.89 [0.42-1.91]     | 0.808    | 1.000   |
| MUC1    | 101         | 7         | 6.93%         | 196          | 13        | 6.63%         | 0.95 [0.43-2.12]     | 0.923    | 1.000   |
| MUC20   | 101         | 4         | 3.96%         | 196          | 6         | 3.06%         | 0.77 [0.26-2.26]     | 0.685    | 0.943   |
| MUC4    | 101         | 3         | 2.97%         | 196          | 4         | 2.04%         | 0.68 [0.19-2.43]     | 0.619    | 0.898   |
| MVP     | 101         | 5         | 4.95%         | 196          | 3         | 1.53%         | 0.30 [0.088-1.01]    | 0.103    | 0.507   |
| MXRA7   | 101         | 3         | 2.97%         | 196          | 14        | 7.14%         | 2.51 [0.86-7.30]     | 0.155    | 0.535   |
| MYADML2 | 101         | 2         | 1.98%         | 196          | 13        | 6.63%         | 3.52 [0.99-12.47]    | 0.102    | 0.507   |
| MYBL1   | 101         | 15        | 14.85%        | 196          | 38        | 19.39%        | 1.38 [0.80-2.38]     | 0.335    | 0.716   |
| MYBL2   | 101         | 2         | 1.98%         | 196          | 4         | 2.04%         | 1.03 [0.24-4.35]     | 0.972    | 1.000   |
| MYBPH   | 101         | 7         | 6.93%         | 196          | 28        | 14.29%        | 2.24 [1.08-4.63]     | 0.068    | 0.507   |
| MYCBPAP | 101         | 4         | 3.96%         | 196          | 19        | 9.69%         | 2.60 [1.03-6.59]     | 0.090    | 0.507   |
| MYC     | 101         | 14        | 13.86%        | 196          | 64        | 32.65%        | 3.01 [1.76-5.15]     | 7.10E-04 | 0.507   |
| MYEOV   | 101         | 21        | 20.79%        | 196          | 54        | 27.55%        | 1.45 [0.90-2.34]     | 0.205    | 0.573   |
| MYF5    | 101         | 1         | 0.99%         | 196          | 4         | 2.04%         | 2.08 [0.33-13.25]    | 0.514    | 0.805   |
| MYF6    | 101         | 1         | 0.99%         | 196          | 4         | 2.04%         | 2.08 [0.33-13.25]    | 0.514    | 0.805   |
| MYH11   | 101         | 7         | 6.93%         | 196          | 3         | 1.53%         | 0.21 [0.066-0.66]    | 2.55E-02 | 0.507   |
| MYH7B   | 101         | 4         | 3.96%         | 196          | 8         | 4.08%         | 1.03 [0.37-2.88]     | 0.960    | 1.000   |
| MYL4    | 101         | 1         | 0.99%         | 196          | 7         | 3.57%         | 3.70 [0.63-21.75]    | 0.224    | 0.596   |
| MYL9    | 101         | 4         | 3.96%         | 196          | 6         | 3.06%         | 0.77 [0.26-2.26]     | 0.685    | 0.943   |
| MYLPF   | 101         | 4         | 3.96%         | 196          | 5         | 2.55%         | 0.63 [0.21-1.95]     | 0.505    | 0.805   |
| MYO15B  | 101         | 5         | 4.95%         | 196          | 12        | 6.12%         | 1.25 [0.51-3.08]     | 0.681    | 0.943   |
| MYO16   | 101         | 0         | 0.00%         | 196          | 5         | 2.55%         | 2.2e+07 [0e+00-inf]  | 0.992    | 1.000   |
| MYO18A  | 101         | 3         | 2.97%         | 196          | 5         | 2.55%         | 0.86 [0.25-2.89]     | 0.833    | 1.000   |

| Symbol     | CINSARC Low |           |               | CINSARC High |           |               | CINSARC High vs. Low |          |         |
|------------|-------------|-----------|---------------|--------------|-----------|---------------|----------------------|----------|---------|
|            | N tested    | N altered | Fq alteration | N tested     | N altered | Fq alteration | OR [95%CI]           | p-value* | q-value |
| MYO19      | 101         | 2         | 1.98%         | 196          | 5         | 2.55%         | 1.30 [0.32-5.21]     | 0.759    | 0.996   |
| MYO1D      | 101         | 2         | 1.98%         | 196          | 5         | 2.55%         | 1.30 [0.32-5.21]     | 0.759    | 0.996   |
| MYO7A      | 101         | 8         | 7.92%         | 196          | 20        | 10.20%        | 1.32 [0.64-2.71]     | 0.525    | 0.818   |
| MYOC       | 101         | 5         | 4.95%         | 196          | 13        | 6.63%         | 1.36 [0.56-3.32]     | 0.566    | 0.852   |
| MYOD1      | 101         | 1         | 0.99%         | 196          | 4         | 2.04%         | 2.08 [0.33-13.25]    | 0.514    | 0.805   |
| MYOG       | 101         | 7         | 6.93%         | 196          | 27        | 13.78%        | 2.15 [1.03-4.45]     | 0.085    | 0.507   |
| MYOZ1      | 101         | 0         | 0.00%         | 196          | 5         | 2.55%         | 2.2e+07 [0e+00-Inf]  | 0.992    | 1.000   |
| KAT8       | 101         | 4         | 3.96%         | 196          | 5         | 2.55%         | 0.63 [0.21-1.95]     | 0.505    | 0.805   |
| KAT7       | 101         | 4         | 3.96%         | 196          | 16        | 8.16%         | 2.16 [0.84-5.53]     | 0.180    | 0.535   |
| KAT6A      | 101         | 16        | 15.84%        | 196          | 31        | 15.82%        | 1.00 [0.57-1.73]     | 0.995    | 1.000   |
| KAT6B      | 101         | 2         | 1.98%         | 196          | 7         | 3.57%         | 1.83 [0.48-6.96]     | 0.455    | 0.805   |
| MYT1       | 101         | 9         | 8.91%         | 196          | 11        | 5.61%         | 0.61 [0.28-1.31]     | 0.287    | 0.650   |
| NAAA       | 101         | 2         | 1.98%         | 196          | 5         | 2.55%         | 1.30 [0.32-5.21]     | 0.759    | 0.996   |
| NAALAD2    | 101         | 1         | 0.99%         | 196          | 4         | 2.04%         | 2.08 [0.33-13.25]    | 0.514    | 0.805   |
| NACA2      | 101         | 8         | 7.92%         | 196          | 30        | 15.31%        | 2.10 [1.06-4.18]     | 0.076    | 0.507   |
| NADSYN1    | 101         | 10        | 9.90%         | 196          | 24        | 12.24%        | 1.27 [0.66-2.44]     | 0.549    | 0.851   |
| NAGPA      | 101         | 5         | 4.95%         | 196          | 5         | 2.55%         | 0.50 [0.17-1.45]     | 0.286    | 0.650   |
| NAIP       | 101         | 4         | 3.96%         | 196          | 8         | 4.08%         | 1.03 [0.37-2.88]     | 0.960    | 1.000   |
| NAP1L1     | 101         | 1         | 0.99%         | 196          | 4         | 2.04%         | 2.08 [0.33-13.25]    | 0.514    | 0.805   |
| NARF       | 101         | 2         | 1.98%         | 196          | 15        | 7.65%         | 4.10 [1.17-14.39]    | 0.064    | 0.507   |
| NARS2      | 101         | 7         | 6.93%         | 196          | 15        | 7.65%         | 1.11 [0.51-2.43]     | 0.822    | 1.000   |
| NAT14      | 101         | 2         | 1.98%         | 196          | 4         | 2.04%         | 1.03 [0.24-4.35]     | 0.972    | 1.000   |
| NAA60      | 101         | 5         | 4.95%         | 196          | 4         | 2.04%         | 0.40 [0.13-1.23]     | 0.179    | 0.535   |
| NAT9       | 101         | 5         | 4.95%         | 196          | 14        | 7.14%         | 1.48 [0.61-3.57]     | 0.467    | 0.805   |
| NAV1       | 101         | 7         | 6.93%         | 196          | 23        | 11.73%        | 1.79 [0.85-3.74]     | 0.198    | 0.570   |
| NAV3       | 101         | 1         | 0.99%         | 196          | 4         | 2.04%         | 2.08 [0.33-13.25]    | 0.514    | 0.805   |
| NBN        | 101         | 18        | 17.82%        | 196          | 50        | 25.51%        | 1.58 [0.95-2.62]     | 0.137    | 0.535   |
| NBPF10     | 101         | 5         | 4.95%         | 196          | 9         | 4.59%         | 0.92 [0.36-2.37]     | 0.890    | 1.000   |
| NBPF14     | 101         | 4         | 3.96%         | 196          | 8         | 4.08%         | 1.03 [0.37-2.88]     | 0.960    | 1.000   |
| NBPF15     | 101         | 3         | 2.97%         | 196          | 5         | 2.55%         | 0.86 [0.25-2.89]     | 0.833    | 1.000   |
| NBPF7      | 101         | 1         | 0.99%         | 196          | 4         | 2.04%         | 2.08 [0.33-13.25]    | 0.514    | 0.805   |
| NBPF9      | 101         | 1         | 0.99%         | 196          | 7         | 3.57%         | 3.70 [0.63-21.75]    | 0.224    | 0.596   |
| NCALD      | 101         | 17        | 16.83%        | 196          | 55        | 28.06%        | 1.93 [1.16-3.21]     | 3.42E-02 | 0.507   |
| NCBP2      | 101         | 4         | 3.96%         | 196          | 4         | 2.04%         | 0.51 [0.16-1.65]     | 0.342    | 0.716   |
| NCF2       | 101         | 5         | 4.95%         | 196          | 20        | 10.20%        | 2.18 [0.93-5.10]     | 0.130    | 0.535   |
| NCOA2      | 101         | 16        | 15.84%        | 196          | 40        | 20.41%        | 1.36 [0.80-2.33]     | 0.342    | 0.716   |
| NCOA3      | 101         | 5         | 4.95%         | 196          | 7         | 3.57%         | 0.71 [0.27-1.90]     | 0.569    | 0.855   |
| NCOA5      | 101         | 5         | 4.95%         | 196          | 4         | 2.04%         | 0.40 [0.13-1.23]     | 0.179    | 0.535   |
| NCOA6      | 101         | 4         | 3.96%         | 196          | 6         | 3.06%         | 0.77 [0.26-2.26]     | 0.685    | 0.943   |
| LINC00029  | 101         | 7         | 6.93%         | 196          | 13        | 6.63%         | 0.95 [0.43-2.12]     | 0.923    | 1.000   |
| LINC00051  | 101         | 17        | 16.83%        | 196          | 49        | 25.00%        | 1.65 [0.98-2.76]     | 0.111    | 0.511   |
| LINC00052  | 101         | 1         | 0.99%         | 196          | 7         | 3.57%         | 3.70 [0.63-21.75]    | 0.224    | 0.596   |
| FBXL19-AS1 | 101         | 4         | 3.96%         | 196          | 5         | 2.55%         | 0.63 [0.21-1.95]     | 0.505    | 0.805   |
| LINC00685  | 101         | 2         | 1.98%         | 196          | 4         | 2.04%         | 1.03 [0.24-4.35]     | 0.972    | 1.000   |
| CRYM-AS1   | 101         | 5         | 4.95%         | 196          | 3         | 1.53%         | 0.30 [0.088-1.01]    | 0.103    | 0.507   |
| TTY14      | 101         | 0         | 0.00%         | 196          | 0         | 0.00%         | 1.00 [0e+00-Inf]     | 1.000    | 1.000   |
| FAM224B    | 101         | 0         | 0.00%         | 196          | 0         | 0.00%         | 1.00 [0e+00-Inf]     | 1.000    | 1.000   |
| LINC00235  | 101         | 7         | 6.93%         | 196          | 4         | 2.04%         | 0.28 [0.098-0.80]    | 4.63E-02 | 0.507   |
| NCSTN      | 101         | 6         | 5.94%         | 196          | 13        | 6.63%         | 1.12 [0.49-2.60]     | 0.817    | 1.000   |
| NDE1       | 101         | 7         | 6.93%         | 196          | 3         | 1.53%         | 0.21 [0.066-0.66]    | 2.55E-02 | 0.507   |
| NDRG1      | 101         | 16        | 15.84%        | 196          | 55        | 28.06%        | 2.07 [1.23-3.48]     | 2.09E-02 | 0.507   |
| NDRG3      | 101         | 4         | 3.96%         | 196          | 6         | 3.06%         | 0.77 [0.26-2.26]     | 0.685    | 0.943   |
| NDST2      | 101         | 0         | 0.00%         | 196          | 5         | 2.55%         | 2.2e+07 [0e+00-Inf]  | 0.992    | 1.000   |
| NDUFAB1    | 101         | 5         | 4.95%         | 196          | 3         | 1.53%         | 0.30 [0.088-1.01]    | 0.103    | 0.507   |
| NDUFB10    | 101         | 6         | 5.94%         | 196          | 5         | 2.55%         | 0.41 [0.15-1.15]     | 0.154    | 0.535   |
| NDUFB2     | 101         | 1         | 0.99%         | 196          | 4         | 2.04%         | 2.08 [0.33-13.25]    | 0.514    | 0.805   |
| NDUFB5     | 101         | 4         | 3.96%         | 196          | 2         | 1.02%         | 0.25 [0.059-1.05]    | 0.113    | 0.511   |
| NDUFB9     | 101         | 16        | 15.84%        | 196          | 57        | 29.08%        | 2.18 [1.30-3.66]     | 1.33E-02 | 0.507   |
| NDUFC2     | 101         | 9         | 8.91%         | 196          | 20        | 10.20%        | 1.16 [0.58-2.32]     | 0.722    | 0.980   |
| NDUFS2     | 101         | 6         | 5.94%         | 196          | 16        | 8.16%         | 1.41 [0.62-3.18]     | 0.490    | 0.805   |
| NDUFS8     | 101         | 9         | 8.91%         | 196          | 22        | 11.22%        | 1.29 [0.65-2.56]     | 0.538    | 0.835   |
| NDUFV1     | 101         | 9         | 8.91%         | 196          | 20        | 10.20%        | 1.16 [0.58-2.32]     | 0.722    | 0.980   |
| NECAB1     | 101         | 18        | 17.82%        | 196          | 47        | 23.98%        | 1.45 [0.87-2.42]     | 0.226    | 0.598   |
| NEK2       | 101         | 7         | 6.93%         | 196          | 20        | 10.20%        | 1.53 [0.72-3.24]     | 0.355    | 0.722   |
| NEK7       | 101         | 5         | 4.95%         | 196          | 22        | 11.22%        | 2.43 [1.05-5.63]     | 0.083    | 0.507   |
| NEK8       | 101         | 3         | 2.97%         | 196          | 9         | 4.59%         | 1.57 [0.52-4.80]     | 0.505    | 0.805   |
| NENF       | 101         | 7         | 6.93%         | 196          | 21        | 10.71%        | 1.61 [0.76-3.40]     | 0.294    | 0.650   |
| NES        | 101         | 7         | 6.93%         | 196          | 8         | 4.08%         | 0.57 [0.24-1.37]     | 0.294    | 0.650   |
| NEU3       | 101         | 6         | 5.94%         | 196          | 15        | 7.65%         | 1.31 [0.58-2.98]     | 0.586    | 0.869   |
| NEURL2     | 101         | 5         | 4.95%         | 196          | 4         | 2.04%         | 0.40 [0.13-1.23]     | 0.179    | 0.535   |
| NEUROD2    | 101         | 6         | 5.94%         | 196          | 12        | 6.12%         | 1.03 [0.44-2.41]     | 0.950    | 1.000   |

| Symbol    | CINSARC Low |           |               | CINSARC High |           |               | CINSARC High vs. Low |          |         |
|-----------|-------------|-----------|---------------|--------------|-----------|---------------|----------------------|----------|---------|
|           | N tested    | N altered | Fq alteration | N tested     | N altered | Fq alteration | OR [95%CI]           | p-value* | q-value |
| NEUROD6   | 101         | 0         | 0.00%         | 196          | 8         | 4.08%         | 3.6e+07 [0e+00-Inf]  | 0.992    | 1.000   |
| NF1       | 101         | 2         | 1.98%         | 196          | 3         | 1.53%         | 0.77 [0.17-3.50]     | 0.776    | 0.996   |
| NFASC     | 101         | 7         | 6.93%         | 196          | 26        | 13.27%        | 2.05 [0.99-4.27]     | 0.106    | 0.507   |
| NFATC2IP  | 101         | 6         | 5.94%         | 196          | 3         | 1.53%         | 0.25 [0.076-0.80]    | 0.051    | 0.507   |
| NFATC2    | 101         | 7         | 6.93%         | 196          | 15        | 7.65%         | 1.11 [0.51-2.43]     | 0.822    | 1.000   |
| NFE2L1    | 101         | 1         | 0.99%         | 196          | 13        | 6.63%         | 7.10 [1.27-39.64]    | 0.061    | 0.507   |
| NFE2L3    | 101         | 0         | 0.00%         | 196          | 5         | 2.55%         | 2.2e+07 [0e+00-Inf]  | 0.992    | 1.000   |
| NFKBIA    | 101         | 0         | 0.00%         | 196          | 9         | 4.59%         | 4.1e+07 [0e+00-Inf]  | 0.992    | 1.000   |
| TONSL     | 101         | 19        | 18.81%        | 196          | 49        | 25.00%        | 1.44 [0.87-2.37]     | 0.231    | 0.599   |
| NFS1      | 101         | 4         | 3.96%         | 196          | 8         | 4.08%         | 1.03 [0.37-2.88]     | 0.960    | 1.000   |
| NGFR      | 101         | 4         | 3.96%         | 196          | 17        | 8.67%         | 2.30 [0.90-5.88]     | 0.143    | 0.535   |
| NGRN      | 101         | 2         | 1.98%         | 196          | 7         | 3.57%         | 1.83 [0.48-6.96]     | 0.455    | 0.805   |
| NHLH1     | 101         | 5         | 4.95%         | 196          | 13        | 6.63%         | 1.36 [0.56-3.32]     | 0.566    | 0.852   |
| NHLRC4    | 101         | 7         | 6.93%         | 196          | 4         | 2.04%         | 0.28 [0.098-0.80]    | 4.63E-02 | 0.507   |
| NID1      | 101         | 7         | 6.93%         | 196          | 20        | 10.20%        | 1.53 [0.72-3.24]     | 0.355    | 0.722   |
| NIPAL2    | 101         | 16        | 15.84%        | 196          | 54        | 27.55%        | 2.02 [1.20-3.40]     | 2.60E-02 | 0.507   |
| NIT1      | 101         | 6         | 5.94%         | 196          | 16        | 8.16%         | 1.41 [0.62-3.18]     | 0.490    | 0.805   |
| NKAIN3    | 101         | 14        | 13.86%        | 196          | 32        | 16.33%        | 1.21 [0.69-2.15]     | 0.578    | 0.867   |
| NKAIN4    | 101         | 7         | 6.93%         | 196          | 13        | 6.63%         | 0.95 [0.43-2.12]     | 0.923    | 1.000   |
| NKX2-1    | 101         | 0         | 0.00%         | 196          | 11        | 5.61%         | 5.1e+07 [0e+00-Inf]  | 0.992    | 1.000   |
| NKX2-5    | 101         | 2         | 1.98%         | 196          | 4         | 2.04%         | 1.03 [0.24-4.35]     | 0.972    | 1.000   |
| NKX2-8    | 101         | 0         | 0.00%         | 196          | 12        | 6.12%         | 5.6e+07 [0e+00-Inf]  | 0.992    | 1.000   |
| NKX6-3    | 101         | 15        | 14.85%        | 196          | 32        | 16.33%        | 1.12 [0.64-1.96]     | 0.742    | 0.996   |
| NLE1      | 101         | 1         | 0.99%         | 196          | 7         | 3.57%         | 3.70 [0.63-21.75]    | 0.224    | 0.596   |
| NLGN1     | 101         | 2         | 1.98%         | 196          | 3         | 1.53%         | 0.77 [0.17-3.50]     | 0.776    | 0.996   |
| NLGN4Y    | 101         | 0         | 0.00%         | 196          | 0         | 0.00%         | 1.00 [0e+00-Inf]     | 1.000    | 1.000   |
| NLK       | 101         | 4         | 3.96%         | 196          | 4         | 2.04%         | 0.51 [0.16-1.65]     | 0.342    | 0.716   |
| NLRC3     | 101         | 5         | 4.95%         | 196          | 4         | 2.04%         | 0.40 [0.13-1.23]     | 0.179    | 0.535   |
| NLRP11    | 101         | 1         | 0.99%         | 196          | 4         | 2.04%         | 2.08 [0.33-13.25]    | 0.514    | 0.805   |
| NLRP13    | 101         | 1         | 0.99%         | 196          | 4         | 2.04%         | 2.08 [0.33-13.25]    | 0.514    | 0.805   |
| NLRP3     | 101         | 5         | 4.95%         | 196          | 19        | 9.69%         | 2.06 [0.88-4.83]     | 0.163    | 0.535   |
| NLRP4     | 101         | 1         | 0.99%         | 196          | 4         | 2.04%         | 2.08 [0.33-13.25]    | 0.514    | 0.805   |
| NLRP8     | 101         | 1         | 0.99%         | 196          | 4         | 2.04%         | 2.08 [0.33-13.25]    | 0.514    | 0.805   |
| NLRP9     | 101         | 2         | 1.98%         | 196          | 4         | 2.04%         | 1.03 [0.24-4.35]     | 0.972    | 1.000   |
| NMB       | 101         | 1         | 0.99%         | 196          | 5         | 2.55%         | 2.62 [0.43-16.05]    | 0.383    | 0.750   |
| NME1-NME2 | 101         | 4         | 3.96%         | 196          | 19        | 9.69%         | 2.60 [1.03-6.59]     | 0.090    | 0.507   |
| NME1      | 101         | 4         | 3.96%         | 196          | 19        | 9.69%         | 2.60 [1.03-6.59]     | 0.090    | 0.507   |
| NME2      | 101         | 4         | 3.96%         | 196          | 19        | 9.69%         | 2.60 [1.03-6.59]     | 0.090    | 0.507   |
| NME3      | 101         | 6         | 5.94%         | 196          | 5         | 2.55%         | 0.41 [0.15-1.15]     | 0.154    | 0.535   |
| NME4      | 101         | 7         | 6.93%         | 196          | 4         | 2.04%         | 0.28 [0.098-0.80]    | 4.63E-02 | 0.507   |
| NME7      | 101         | 4         | 3.96%         | 196          | 17        | 8.67%         | 2.30 [0.90-5.88]     | 0.143    | 0.535   |
| NMNAT2    | 101         | 5         | 4.95%         | 196          | 19        | 9.69%         | 2.06 [0.88-4.83]     | 0.163    | 0.535   |
| NMRAL1    | 101         | 5         | 4.95%         | 196          | 6         | 3.06%         | 0.61 [0.22-1.68]     | 0.418    | 0.779   |
| NNAT      | 101         | 5         | 4.95%         | 196          | 3         | 1.53%         | 0.30 [0.088-1.01]    | 0.103    | 0.507   |
| NOD1      | 101         | 0         | 0.00%         | 196          | 7         | 3.57%         | 3.2e+07 [0e+00-Inf]  | 0.992    | 1.000   |
| NOG       | 101         | 9         | 8.91%         | 196          | 22        | 11.22%        | 1.29 [0.65-2.56]     | 0.538    | 0.835   |
| NOL11     | 101         | 9         | 8.91%         | 196          | 29        | 14.80%        | 1.78 [0.91-3.44]     | 0.155    | 0.535   |
| NOM1      | 101         | 2         | 1.98%         | 196          | 3         | 1.53%         | 0.77 [0.17-3.50]     | 0.776    | 0.996   |
| NOMO1     | 101         | 9         | 8.91%         | 196          | 3         | 1.53%         | 0.16 [0.052-0.49]    | 6.71E-03 | 0.507   |
| NOMO2     | 101         | 9         | 8.91%         | 196          | 6         | 3.06%         | 0.32 [0.13-0.79]     | 3.70E-02 | 0.507   |
| NOMO3     | 101         | 7         | 6.93%         | 196          | 3         | 1.53%         | 0.21 [0.066-0.66]    | 2.55E-02 | 0.507   |
| NOS1AP    | 101         | 5         | 4.95%         | 196          | 18        | 9.18%         | 1.94 [0.82-4.58]     | 0.203    | 0.570   |
| NOS2      | 101         | 4         | 3.96%         | 196          | 5         | 2.55%         | 0.63 [0.21-1.95]     | 0.505    | 0.805   |
| NOTUM     | 101         | 2         | 1.98%         | 196          | 13        | 6.63%         | 3.52 [0.99-12.47]    | 0.102    | 0.507   |
| NOVA1     | 101         | 0         | 0.00%         | 196          | 5         | 2.55%         | 2.2e+07 [0e+00-Inf]  | 0.992    | 1.000   |
| NOXO1     | 101         | 6         | 5.94%         | 196          | 5         | 2.55%         | 0.41 [0.15-1.15]     | 0.154    | 0.535   |
| NPAS3     | 101         | 1         | 0.99%         | 196          | 7         | 3.57%         | 3.70 [0.63-21.75]    | 0.224    | 0.596   |
| NPAS4     | 101         | 5         | 4.95%         | 196          | 8         | 4.08%         | 0.82 [0.31-2.13]     | 0.729    | 0.986   |
| NPBWR1    | 101         | 12        | 11.88%        | 196          | 27        | 13.78%        | 1.18 [0.64-2.18]     | 0.647    | 0.928   |
| NPBWR2    | 101         | 7         | 6.93%         | 196          | 11        | 5.61%         | 0.80 [0.35-1.82]     | 0.652    | 0.928   |
| NPB       | 101         | 2         | 1.98%         | 196          | 13        | 6.63%         | 3.52 [0.99-12.47]    | 0.102    | 0.507   |
| NPEPL1    | 101         | 8         | 7.92%         | 196          | 16        | 8.16%         | 1.03 [0.49-2.17]     | 0.942    | 1.000   |
| NPEPPS    | 101         | 2         | 1.98%         | 196          | 6         | 3.06%         | 1.56 [0.40-6.08]     | 0.589    | 0.869   |
| NPHS2     | 101         | 5         | 4.95%         | 196          | 19        | 9.69%         | 2.06 [0.88-4.83]     | 0.163    | 0.535   |
| NPIP3     | 101         | 6         | 5.94%         | 196          | 2         | 1.02%         | 0.16 [0.042-0.64]    | 2.82E-02 | 0.507   |
| NPIPA1    | 101         | 7         | 6.93%         | 196          | 3         | 1.53%         | 0.21 [0.066-0.66]    | 2.55E-02 | 0.507   |
| NPLOC4    | 101         | 2         | 1.98%         | 196          | 12        | 6.12%         | 3.23 [0.90-11.53]    | 0.130    | 0.535   |
| NPL       | 101         | 5         | 4.95%         | 196          | 19        | 9.69%         | 2.06 [0.88-4.83]     | 0.163    | 0.535   |
| NPR1      | 101         | 7         | 6.93%         | 196          | 12        | 6.12%         | 0.88 [0.39-1.97]     | 0.788    | 0.996   |
| NPRL3     | 101         | 7         | 6.93%         | 196          | 4         | 2.04%         | 0.28 [0.098-0.80]    | 4.63E-02 | 0.507   |
| NPSR1     | 101         | 0         | 0.00%         | 196          | 5         | 2.55%         | 2.2e+07 [0e+00-Inf]  | 0.992    | 1.000   |



| Symbol          | CINSARC Low |           |               | CINSARC High |           |               | CINSARC High vs. Low |          |         |
|-----------------|-------------|-----------|---------------|--------------|-----------|---------------|----------------------|----------|---------|
|                 | N tested    | N altered | Fq alteration | N tested     | N altered | Fq alteration | OR [95%CI]           | p-value* | q-value |
| <i>NPTX1</i>    | 101         | 2         | 1.98%         | 196          | 13        | 6.63%         | 3.52 [0.99-12.47]    | 0.102    | 0.507   |
| <i>NPVF</i>     | 101         | 0         | 0.00%         | 196          | 6         | 3.06%         | 2.7e+07 [0e+00-Inf]  | 0.992    | 1.000   |
| <i>NPW</i>      | 101         | 6         | 5.94%         | 196          | 5         | 2.55%         | 0.41 [0.15-1.15]     | 0.154    | 0.535   |
| <i>NPY</i>      | 101         | 0         | 0.00%         | 196          | 6         | 3.06%         | 2.7e+07 [0e+00-Inf]  | 0.992    | 1.000   |
| <i>NR1D1</i>    | 101         | 5         | 4.95%         | 196          | 9         | 4.59%         | 0.92 [0.36-2.37]     | 0.890    | 1.000   |
| <i>NR1I3</i>    | 101         | 6         | 5.94%         | 196          | 16        | 8.16%         | 1.41 [0.62-3.18]     | 0.490    | 0.805   |
| <i>NR2E1</i>    | 101         | 1         | 0.99%         | 196          | 5         | 2.55%         | 2.62 [0.43-16.05]    | 0.383    | 0.750   |
| <i>NR2F2</i>    | 101         | 0         | 0.00%         | 196          | 5         | 2.55%         | 2.2e+07 [0e+00-Inf]  | 0.992    | 1.000   |
| <i>NR5A2</i>    | 101         | 6         | 5.94%         | 196          | 23        | 11.73%        | 2.11 [0.96-4.60]     | 0.118    | 0.526   |
| <i>NRBP2</i>    | 101         | 16        | 15.84%        | 196          | 51        | 26.02%        | 1.87 [1.11-3.15]     | 4.89E-02 | 0.507   |
| <i>NRG1</i>     | 101         | 3         | 2.97%         | 196          | 8         | 4.08%         | 1.39 [0.45-4.31]     | 0.632    | 0.909   |
| <i>NSL1</i>     | 101         | 6         | 5.94%         | 196          | 21        | 10.71%        | 1.90 [0.86-4.19]     | 0.181    | 0.535   |
| <i>NSMAF</i>    | 101         | 14        | 13.86%        | 196          | 33        | 16.84%        | 1.26 [0.71-2.22]     | 0.506    | 0.805   |
| <i>NSMCE1</i>   | 101         | 5         | 4.95%         | 196          | 3         | 1.53%         | 0.30 [0.088-1.01]    | 0.103    | 0.507   |
| <i>NSMCE2</i>   | 101         | 16        | 15.84%        | 196          | 58        | 29.59%        | 2.23 [1.33-3.74]     | 1.06E-02 | 0.507   |
| <i>NT5C3A</i>   | 101         | 0         | 0.00%         | 196          | 8         | 4.08%         | 3.6e+07 [0e+00-Inf]  | 0.992    | 1.000   |
| <i>NT5C</i>     | 101         | 5         | 4.95%         | 196          | 12        | 6.12%         | 1.25 [0.51-3.08]     | 0.681    | 0.943   |
| <i>NTAN1</i>    | 101         | 7         | 6.93%         | 196          | 3         | 1.53%         | 0.21 [0.066-0.66]    | 2.55E-02 | 0.507   |
| <i>NTHL1</i>    | 101         | 6         | 5.94%         | 196          | 5         | 2.55%         | 0.41 [0.15-1.15]     | 0.154    | 0.535   |
| <i>NTN3</i>     | 101         | 6         | 5.94%         | 196          | 5         | 2.55%         | 0.41 [0.15-1.15]     | 0.154    | 0.535   |
| <i>NTRK1</i>    | 101         | 7         | 6.93%         | 196          | 8         | 4.08%         | 0.57 [0.24-1.37]     | 0.294    | 0.650   |
| <i>NTRK3</i>    | 101         | 1         | 0.99%         | 196          | 5         | 2.55%         | 2.62 [0.43-16.05]    | 0.383    | 0.750   |
| <i>NTSR1</i>    | 101         | 7         | 6.93%         | 196          | 13        | 6.63%         | 0.95 [0.43-2.12]     | 0.923    | 1.000   |
| <i>NUAK2</i>    | 101         | 7         | 6.93%         | 196          | 27        | 13.78%        | 2.15 [1.03-4.45]     | 0.085    | 0.507   |
| <i>NUBP1</i>    | 101         | 5         | 4.95%         | 196          | 3         | 1.53%         | 0.30 [0.088-1.01]    | 0.103    | 0.507   |
| <i>NUBP2</i>    | 101         | 6         | 5.94%         | 196          | 5         | 2.55%         | 0.41 [0.15-1.15]     | 0.154    | 0.535   |
| <i>NUBPL</i>    | 101         | 1         | 0.99%         | 196          | 8         | 4.08%         | 4.26 [0.73-24.65]    | 0.175    | 0.535   |
| <i>NUCB2</i>    | 101         | 1         | 0.99%         | 196          | 4         | 2.04%         | 2.08 [0.33-13.25]    | 0.514    | 0.805   |
| <i>NUCKS1</i>   | 101         | 7         | 6.93%         | 196          | 27        | 13.78%        | 2.15 [1.03-4.45]     | 0.085    | 0.507   |
| <i>NUDCD1</i>   | 101         | 15        | 14.85%        | 196          | 54        | 27.55%        | 2.18 [1.28-3.70]     | 1.56E-02 | 0.507   |
| <i>NUDCD3</i>   | 101         | 1         | 0.99%         | 196          | 4         | 2.04%         | 2.08 [0.33-13.25]    | 0.514    | 0.805   |
| <i>NUDT13</i>   | 101         | 1         | 0.99%         | 196          | 5         | 2.55%         | 2.62 [0.43-16.05]    | 0.383    | 0.750   |
| <i>NUDT16L1</i> | 101         | 5         | 4.95%         | 196          | 6         | 3.06%         | 0.61 [0.22-1.68]     | 0.418    | 0.779   |
| <i>NUDT17</i>   | 101         | 5         | 4.95%         | 196          | 10        | 5.10%         | 1.03 [0.41-2.60]     | 0.955    | 1.000   |
| <i>NUDT4</i>    | 101         | 0         | 0.00%         | 196          | 5         | 2.55%         | 2.2e+07 [0e+00-Inf]  | 0.992    | 1.000   |
| <i>NUDT8</i>    | 101         | 10        | 9.90%         | 196          | 19        | 9.69%         | 0.98 [0.50-1.92]     | 0.955    | 1.000   |
| <i>NUF2</i>     | 101         | 5         | 4.95%         | 196          | 13        | 6.63%         | 1.36 [0.56-3.32]     | 0.566    | 0.852   |
| <i>NUFIP2</i>   | 101         | 3         | 2.97%         | 196          | 5         | 2.55%         | 0.86 [0.25-2.89]     | 0.833    | 1.000   |
| <i>NUMA1</i>    | 101         | 5         | 4.95%         | 196          | 5         | 2.55%         | 0.50 [0.17-1.45]     | 0.286    | 0.650   |
| <i>NUP107</i>   | 101         | 2         | 1.98%         | 196          | 17        | 8.67%         | 4.70 [1.35-16.35]    | 4.11E-02 | 0.507   |
| <i>NUP133</i>   | 101         | 6         | 5.94%         | 196          | 19        | 9.69%         | 1.70 [0.77-3.78]     | 0.274    | 0.643   |
| <i>NUP210L</i>  | 101         | 7         | 6.93%         | 196          | 13        | 6.63%         | 0.95 [0.43-2.12]     | 0.923    | 1.000   |
| <i>NUP54</i>    | 101         | 1         | 0.99%         | 196          | 5         | 2.55%         | 2.62 [0.43-16.05]    | 0.383    | 0.750   |
| <i>NUP85</i>    | 101         | 5         | 4.95%         | 196          | 13        | 6.63%         | 1.36 [0.56-3.32]     | 0.566    | 0.852   |
| <i>NUPL2</i>    | 101         | 0         | 0.00%         | 196          | 6         | 3.06%         | 2.7e+07 [0e+00-Inf]  | 0.992    | 1.000   |
| <i>NUPR1</i>    | 101         | 5         | 4.95%         | 196          | 3         | 1.53%         | 0.30 [0.088-1.01]    | 0.103    | 0.507   |
| <i>NVL</i>      | 101         | 7         | 6.93%         | 196          | 17        | 8.67%         | 1.28 [0.59-2.75]     | 0.602    | 0.887   |
| <i>NXPH3</i>    | 101         | 5         | 4.95%         | 196          | 16        | 8.16%         | 1.71 [0.72-4.07]     | 0.311    | 0.680   |
| <i>OAZ3</i>     | 101         | 6         | 5.94%         | 196          | 12        | 6.12%         | 1.03 [0.44-2.41]     | 0.950    | 1.000   |
| <i>OBSCN</i>    | 101         | 6         | 5.94%         | 196          | 21        | 10.71%        | 1.90 [0.86-4.19]     | 0.181    | 0.535   |
| <i>OC90</i>     | 101         | 15        | 14.85%        | 196          | 55        | 28.06%        | 2.24 [1.32-3.80]     | 1.24E-02 | 0.507   |
| <i>OCLM</i>     | 101         | 5         | 4.95%         | 196          | 16        | 8.16%         | 1.71 [0.72-4.07]     | 0.311    | 0.680   |
| <i>ODF1</i>     | 101         | 16        | 15.84%        | 196          | 57        | 29.08%        | 2.18 [1.30-3.66]     | 1.33E-02 | 0.507   |
| <i>TENM4</i>    | 101         | 6         | 5.94%         | 196          | 13        | 6.63%         | 1.12 [0.49-2.60]     | 0.817    | 1.000   |
| <i>OGFR</i>     | 101         | 7         | 6.93%         | 196          | 14        | 7.14%         | 1.03 [0.47-2.28]     | 0.946    | 1.000   |
| <i>OLFML2B</i>  | 101         | 5         | 4.95%         | 196          | 16        | 8.16%         | 1.71 [0.72-4.07]     | 0.311    | 0.680   |
| <i>OMP</i>      | 101         | 7         | 6.93%         | 196          | 21        | 10.71%        | 1.61 [0.76-3.40]     | 0.294    | 0.650   |
| <i>OPA1</i>     | 101         | 3         | 2.97%         | 196          | 3         | 1.53%         | 0.51 [0.13-1.98]     | 0.412    | 0.774   |
| <i>OPLAH</i>    | 101         | 17        | 16.83%        | 196          | 51        | 26.02%        | 1.74 [1.04-2.90]     | 0.076    | 0.507   |
| <i>OPN3</i>     | 101         | 4         | 3.96%         | 196          | 20        | 10.20%        | 2.76 [1.09-6.95]     | 0.071    | 0.507   |
| <i>OPRK1</i>    | 101         | 12        | 11.88%        | 196          | 29        | 14.80%        | 1.29 [0.70-2.36]     | 0.491    | 0.805   |
| <i>OPRL1</i>    | 101         | 7         | 6.93%         | 196          | 11        | 5.61%         | 0.80 [0.35-1.82]     | 0.652    | 0.928   |
| <i>OPTC</i>     | 101         | 7         | 6.93%         | 196          | 28        | 14.29%        | 2.24 [1.08-4.63]     | 0.068    | 0.507   |
| <i>OR10J1</i>   | 101         | 6         | 5.94%         | 196          | 10        | 5.10%         | 0.85 [0.36-2.04]     | 0.762    | 0.996   |
| <i>OR10J3</i>   | 101         | 6         | 5.94%         | 196          | 9         | 4.59%         | 0.76 [0.31-1.86]     | 0.616    | 0.898   |
| <i>OR10J5</i>   | 101         | 6         | 5.94%         | 196          | 10        | 5.10%         | 0.85 [0.36-2.04]     | 0.762    | 0.996   |
| <i>OR10K1</i>   | 101         | 6         | 5.94%         | 196          | 10        | 5.10%         | 0.85 [0.36-2.04]     | 0.762    | 0.996   |
| <i>OR10K2</i>   | 101         | 6         | 5.94%         | 196          | 10        | 5.10%         | 0.85 [0.36-2.04]     | 0.762    | 0.996   |
| <i>OR10R2</i>   | 101         | 6         | 5.94%         | 196          | 10        | 5.10%         | 0.85 [0.36-2.04]     | 0.762    | 0.996   |
| <i>OR10T2</i>   | 101         | 7         | 6.93%         | 196          | 10        | 5.10%         | 0.72 [0.31-1.67]     | 0.522    | 0.815   |
| <i>OR10X1</i>   | 101         | 6         | 5.94%         | 196          | 10        | 5.10%         | 0.85 [0.36-2.04]     | 0.762    | 0.996   |

| Symbol  | CINSARC Low |           |               | CINSARC High |           |               | CINSARC High vs. Low |          |         |
|---------|-------------|-----------|---------------|--------------|-----------|---------------|----------------------|----------|---------|
|         | N tested    | N altered | Fq alteration | N tested     | N altered | Fq alteration | OR [95%CI]           | p-value* | q-value |
| OR10Z1  | 101         | 6         | 5.94%         | 196          | 9         | 4.59%         | 0.76 [0.31-1.86]     | 0.616    | 0.898   |
| OR11L1  | 101         | 5         | 4.95%         | 196          | 21        | 10.71%        | 2.30 [0.99-5.36]     | 0.104    | 0.507   |
| OR13G1  | 101         | 5         | 4.95%         | 196          | 21        | 10.71%        | 2.30 [0.99-5.36]     | 0.104    | 0.507   |
| OR14A16 | 101         | 5         | 4.95%         | 196          | 21        | 10.71%        | 2.30 [0.99-5.36]     | 0.104    | 0.507   |
| OR14C36 | 101         | 5         | 4.95%         | 196          | 20        | 10.20%        | 2.18 [0.93-5.10]     | 0.130    | 0.535   |
| OR14I1  | 101         | 5         | 4.95%         | 196          | 19        | 9.69%         | 2.06 [0.88-4.83]     | 0.163    | 0.535   |
| OR1C1   | 101         | 5         | 4.95%         | 196          | 21        | 10.71%        | 2.30 [0.99-5.36]     | 0.104    | 0.507   |
| OR1F1   | 101         | 6         | 5.94%         | 196          | 4         | 2.04%         | 0.33 [0.11-0.97]     | 0.092    | 0.507   |
| OR1F2P  | 101         | 6         | 5.94%         | 196          | 4         | 2.04%         | 0.33 [0.11-0.97]     | 0.092    | 0.507   |
| OR2A12  | 101         | 1         | 0.99%         | 196          | 4         | 2.04%         | 2.08 [0.33-13.25]    | 0.514    | 0.805   |
| OR2A14  | 101         | 1         | 0.99%         | 196          | 4         | 2.04%         | 2.08 [0.33-13.25]    | 0.514    | 0.805   |
| OR2A1   | 101         | 7         | 6.93%         | 196          | 10        | 5.10%         | 0.72 [0.31-1.67]     | 0.522    | 0.815   |
| OR2A25  | 101         | 1         | 0.99%         | 196          | 4         | 2.04%         | 2.08 [0.33-13.25]    | 0.514    | 0.805   |
| OR2A2   | 101         | 1         | 0.99%         | 196          | 4         | 2.04%         | 2.08 [0.33-13.25]    | 0.514    | 0.805   |
| OR2A5   | 101         | 1         | 0.99%         | 196          | 4         | 2.04%         | 2.08 [0.33-13.25]    | 0.514    | 0.805   |
| OR2A7   | 101         | 6         | 5.94%         | 196          | 11        | 5.61%         | 0.94 [0.40-2.23]     | 0.908    | 1.000   |
| OR2A9P  | 101         | 6         | 5.94%         | 196          | 11        | 5.61%         | 0.94 [0.40-2.23]     | 0.908    | 1.000   |
| OR2AK2  | 101         | 5         | 4.95%         | 196          | 21        | 10.71%        | 2.30 [0.99-5.36]     | 0.104    | 0.507   |
| OR2AT4  | 101         | 6         | 5.94%         | 196          | 15        | 7.65%         | 1.31 [0.58-2.98]     | 0.586    | 0.869   |
| OR2B11  | 101         | 5         | 4.95%         | 196          | 19        | 9.69%         | 2.06 [0.88-4.83]     | 0.163    | 0.535   |
| OR2C1   | 101         | 5         | 4.95%         | 196          | 4         | 2.04%         | 0.40 [0.13-1.23]     | 0.179    | 0.535   |
| OR2C3   | 101         | 5         | 4.95%         | 196          | 19        | 9.69%         | 2.06 [0.88-4.83]     | 0.163    | 0.535   |
| OR2F1   | 101         | 1         | 0.99%         | 196          | 4         | 2.04%         | 2.08 [0.33-13.25]    | 0.514    | 0.805   |
| OR2F2   | 101         | 1         | 0.99%         | 196          | 4         | 2.04%         | 2.08 [0.33-13.25]    | 0.514    | 0.805   |
| OR2G2   | 101         | 5         | 4.95%         | 196          | 19        | 9.69%         | 2.06 [0.88-4.83]     | 0.163    | 0.535   |
| OR2G3   | 101         | 5         | 4.95%         | 196          | 19        | 9.69%         | 2.06 [0.88-4.83]     | 0.163    | 0.535   |
| OR2G6   | 101         | 4         | 3.96%         | 196          | 19        | 9.69%         | 2.60 [1.03-6.59]     | 0.090    | 0.507   |
| OR2L13  | 101         | 5         | 4.95%         | 196          | 20        | 10.20%        | 2.18 [0.93-5.10]     | 0.130    | 0.535   |
| OR2L1P  | 101         | 5         | 4.95%         | 196          | 20        | 10.20%        | 2.18 [0.93-5.10]     | 0.130    | 0.535   |
| OR2L2   | 101         | 5         | 4.95%         | 196          | 20        | 10.20%        | 2.18 [0.93-5.10]     | 0.130    | 0.535   |
| OR2L3   | 101         | 5         | 4.95%         | 196          | 20        | 10.20%        | 2.18 [0.93-5.10]     | 0.130    | 0.535   |
| OR2L8   | 101         | 5         | 4.95%         | 196          | 21        | 10.71%        | 2.30 [0.99-5.36]     | 0.104    | 0.507   |
| OR2M1P  | 101         | 5         | 4.95%         | 196          | 20        | 10.20%        | 2.18 [0.93-5.10]     | 0.130    | 0.535   |
| OR2M2   | 101         | 5         | 4.95%         | 196          | 20        | 10.20%        | 2.18 [0.93-5.10]     | 0.130    | 0.535   |
| OR2M3   | 101         | 5         | 4.95%         | 196          | 20        | 10.20%        | 2.18 [0.93-5.10]     | 0.130    | 0.535   |
| OR2M4   | 101         | 5         | 4.95%         | 196          | 21        | 10.71%        | 2.30 [0.99-5.36]     | 0.104    | 0.507   |
| OR2M5   | 101         | 5         | 4.95%         | 196          | 20        | 10.20%        | 2.18 [0.93-5.10]     | 0.130    | 0.535   |
| OR2M7   | 101         | 5         | 4.95%         | 196          | 20        | 10.20%        | 2.18 [0.93-5.10]     | 0.130    | 0.535   |
| OR2T10  | 101         | 5         | 4.95%         | 196          | 17        | 8.67%         | 1.82 [0.77-4.32]     | 0.252    | 0.623   |
| OR2T11  | 101         | 5         | 4.95%         | 196          | 17        | 8.67%         | 1.82 [0.77-4.32]     | 0.252    | 0.623   |
| OR2T12  | 101         | 5         | 4.95%         | 196          | 21        | 10.71%        | 2.30 [0.99-5.36]     | 0.104    | 0.507   |
| OR2T1   | 101         | 5         | 4.95%         | 196          | 20        | 10.20%        | 2.18 [0.93-5.10]     | 0.130    | 0.535   |
| OR2T27  | 101         | 5         | 4.95%         | 196          | 18        | 9.18%         | 1.94 [0.82-4.58]     | 0.203    | 0.570   |
| OR2T29  | 101         | 4         | 3.96%         | 196          | 19        | 9.69%         | 2.60 [1.03-6.59]     | 0.090    | 0.507   |
| OR2T2   | 101         | 6         | 5.94%         | 196          | 22        | 11.22%        | 2.00 [0.91-4.39]     | 0.146    | 0.535   |
| OR2T33  | 101         | 5         | 4.95%         | 196          | 21        | 10.71%        | 2.30 [0.99-5.36]     | 0.104    | 0.507   |
| OR2T34  | 101         | 5         | 4.95%         | 196          | 18        | 9.18%         | 1.94 [0.82-4.58]     | 0.203    | 0.570   |
| OR2T35  | 101         | 6         | 5.94%         | 196          | 16        | 8.16%         | 1.41 [0.62-3.18]     | 0.490    | 0.805   |
| OR2T3   | 101         | 6         | 5.94%         | 196          | 21        | 10.71%        | 1.90 [0.86-4.19]     | 0.181    | 0.535   |
| OR2T4   | 101         | 5         | 4.95%         | 196          | 20        | 10.20%        | 2.18 [0.93-5.10]     | 0.130    | 0.535   |
| OR2T5   | 101         | 4         | 3.96%         | 196          | 19        | 9.69%         | 2.60 [1.03-6.59]     | 0.090    | 0.507   |
| OR2T6   | 101         | 5         | 4.95%         | 196          | 20        | 10.20%        | 2.18 [0.93-5.10]     | 0.130    | 0.535   |
| OR2T8   | 101         | 5         | 4.95%         | 196          | 21        | 10.71%        | 2.30 [0.99-5.36]     | 0.104    | 0.507   |
| OR2W3   | 101         | 6         | 5.94%         | 196          | 21        | 10.71%        | 1.90 [0.86-4.19]     | 0.181    | 0.535   |
| OR2W5   | 101         | 5         | 4.95%         | 196          | 19        | 9.69%         | 2.06 [0.88-4.83]     | 0.163    | 0.535   |
| OR4C6   | 101         | 1         | 0.99%         | 196          | 5         | 2.55%         | 2.62 [0.43-16.05]    | 0.383    | 0.750   |
| OR4D1   | 101         | 6         | 5.94%         | 196          | 24        | 12.24%        | 2.21 [1.01-4.82]     | 0.095    | 0.507   |
| OR4D2   | 101         | 6         | 5.94%         | 196          | 24        | 12.24%        | 2.21 [1.01-4.82]     | 0.095    | 0.507   |
| OR4F5   | 101         | 2         | 1.98%         | 196          | 9         | 4.59%         | 2.38 [0.65-8.76]     | 0.273    | 0.643   |
| OR4F6   | 101         | 3         | 2.97%         | 196          | 2         | 1.02%         | 0.34 [0.074-1.53]    | 0.237    | 0.599   |
| OR4K1   | 101         | 4         | 3.96%         | 196          | 16        | 8.16%         | 2.16 [0.84-5.53]     | 0.180    | 0.535   |
| OR4K2   | 101         | 4         | 3.96%         | 196          | 16        | 8.16%         | 2.16 [0.84-5.53]     | 0.180    | 0.535   |
| OR4K5   | 101         | 4         | 3.96%         | 196          | 16        | 8.16%         | 2.16 [0.84-5.53]     | 0.180    | 0.535   |
| OR4M1   | 101         | 4         | 3.96%         | 196          | 16        | 8.16%         | 2.16 [0.84-5.53]     | 0.180    | 0.535   |
| OR4M2   | 101         | 1         | 0.99%         | 196          | 5         | 2.55%         | 2.62 [0.43-16.05]    | 0.383    | 0.750   |
| OR4N2   | 101         | 4         | 3.96%         | 196          | 16        | 8.16%         | 2.16 [0.84-5.53]     | 0.180    | 0.535   |
| OR4N3P  | 101         | 1         | 0.99%         | 196          | 5         | 2.55%         | 2.62 [0.43-16.05]    | 0.383    | 0.750   |
| OR4N4   | 101         | 1         | 0.99%         | 196          | 5         | 2.55%         | 2.62 [0.43-16.05]    | 0.383    | 0.750   |
| OR4P4   | 101         | 1         | 0.99%         | 196          | 5         | 2.55%         | 2.62 [0.43-16.05]    | 0.383    | 0.750   |
| OR4Q3   | 101         | 4         | 3.96%         | 196          | 16        | 8.16%         | 2.16 [0.84-5.53]     | 0.180    | 0.535   |
| OR4S2   | 101         | 1         | 0.99%         | 196          | 5         | 2.55%         | 2.62 [0.43-16.05]    | 0.383    | 0.750   |

| Symbol  | CINSARC Low |           |               | CINSARC High |           |               | CINSARC High vs. Low |          |         |
|---------|-------------|-----------|---------------|--------------|-----------|---------------|----------------------|----------|---------|
|         | N tested    | N altered | Fq alteration | N tested     | N altered | Fq alteration | OR [95%CI]           | p-value* | q-value |
| OR52N5  | 101         | 3         | 2.97%         | 196          | 2         | 1.02%         | 0.34 [0.074-1.53]    | 0.237    | 0.599   |
| OR6B1   | 101         | 1         | 0.99%         | 196          | 4         | 2.04%         | 2.08 [0.33-13.25]    | 0.514    | 0.805   |
| OR6F1   | 101         | 5         | 4.95%         | 196          | 21        | 10.71%        | 2.30 [0.99-5.36]     | 0.104    | 0.507   |
| OR6K2   | 101         | 6         | 5.94%         | 196          | 9         | 4.59%         | 0.76 [0.31-1.86]     | 0.616    | 0.898   |
| OR6K3   | 101         | 6         | 5.94%         | 196          | 8         | 4.08%         | 0.67 [0.27-1.68]     | 0.476    | 0.805   |
| OR6K6   | 101         | 6         | 5.94%         | 196          | 8         | 4.08%         | 0.67 [0.27-1.68]     | 0.476    | 0.805   |
| OR6N1   | 101         | 6         | 5.94%         | 196          | 8         | 4.08%         | 0.67 [0.27-1.68]     | 0.476    | 0.805   |
| OR6N2   | 101         | 6         | 5.94%         | 196          | 8         | 4.08%         | 0.67 [0.27-1.68]     | 0.476    | 0.805   |
| OR6P1   | 101         | 7         | 6.93%         | 196          | 10        | 5.10%         | 0.72 [0.31-1.67]     | 0.522    | 0.815   |
| OR6V1   | 101         | 2         | 1.98%         | 196          | 4         | 2.04%         | 1.03 [0.24-4.35]     | 0.972    | 1.000   |
| OR6W1P  | 101         | 2         | 1.98%         | 196          | 4         | 2.04%         | 1.03 [0.24-4.35]     | 0.972    | 1.000   |
| OR6Y1   | 101         | 7         | 6.93%         | 196          | 10        | 5.10%         | 0.72 [0.31-1.67]     | 0.522    | 0.815   |
| OR9A2   | 101         | 2         | 1.98%         | 196          | 4         | 2.04%         | 1.03 [0.24-4.35]     | 0.972    | 1.000   |
| ORAI3   | 101         | 4         | 3.96%         | 196          | 6         | 3.06%         | 0.77 [0.26-2.26]     | 0.685    | 0.943   |
| ORMDL3  | 101         | 5         | 4.95%         | 196          | 11        | 5.61%         | 1.14 [0.46-2.84]     | 0.811    | 1.000   |
| OSBPL2  | 101         | 7         | 6.93%         | 196          | 12        | 6.12%         | 0.88 [0.39-1.97]     | 0.788    | 0.996   |
| OSBPL3  | 101         | 0         | 0.00%         | 196          | 7         | 3.57%         | 3.2e+07 [0e+00-Inf]  | 0.992    | 1.000   |
| OSBPL7  | 101         | 1         | 0.99%         | 196          | 10        | 5.10%         | 5.38 [0.95-30.54]    | 0.111    | 0.511   |
| OSBPL8  | 101         | 1         | 0.99%         | 196          | 6         | 3.06%         | 3.16 [0.53-18.88]    | 0.290    | 0.650   |
| OSGIN2  | 101         | 18        | 17.82%        | 196          | 50        | 25.51%        | 1.58 [0.95-2.62]     | 0.137    | 0.535   |
| OSR2    | 101         | 15        | 14.85%        | 196          | 54        | 27.55%        | 2.18 [1.28-3.70]     | 1.56E-02 | 0.507   |
| OSTM1   | 101         | 1         | 0.99%         | 196          | 4         | 2.04%         | 2.08 [0.33-13.25]    | 0.514    | 0.805   |
| OSTN    | 101         | 2         | 1.98%         | 196          | 3         | 1.53%         | 0.77 [0.17-3.50]     | 0.776    | 0.996   |
| SLC51A  | 101         | 4         | 3.96%         | 196          | 3         | 1.53%         | 0.38 [0.11-1.35]     | 0.207    | 0.573   |
| OTOA    | 101         | 6         | 5.94%         | 196          | 2         | 1.02%         | 0.16 [0.042-0.64]    | 2.82E-02 | 0.507   |
| OTOP2   | 101         | 5         | 4.95%         | 196          | 13        | 6.63%         | 1.36 [0.56-3.32]     | 0.566    | 0.852   |
| OTOP3   | 101         | 5         | 4.95%         | 196          | 13        | 6.63%         | 1.36 [0.56-3.32]     | 0.566    | 0.852   |
| OTUD6B  | 101         | 19        | 18.81%        | 196          | 49        | 25.00%        | 1.44 [0.87-2.37]     | 0.231    | 0.599   |
| OTUD7B  | 101         | 8         | 7.92%         | 196          | 14        | 7.14%         | 0.89 [0.42-1.91]     | 0.808    | 1.000   |
| OXR1    | 101         | 18        | 17.82%        | 196          | 52        | 26.53%        | 1.67 [1.01-2.76]     | 0.096    | 0.507   |
| P2RY12  | 101         | 3         | 2.97%         | 196          | 2         | 1.02%         | 0.34 [0.074-1.53]    | 0.237    | 0.599   |
| P2RY13  | 101         | 3         | 2.97%         | 196          | 2         | 1.02%         | 0.34 [0.074-1.53]    | 0.237    | 0.599   |
| P2RY14  | 101         | 3         | 2.97%         | 196          | 2         | 1.02%         | 0.34 [0.074-1.53]    | 0.237    | 0.599   |
| P2RY2   | 101         | 7         | 6.93%         | 196          | 11        | 5.61%         | 0.80 [0.35-1.82]     | 0.652    | 0.928   |
| P2RY6   | 101         | 7         | 6.93%         | 196          | 10        | 5.10%         | 0.72 [0.31-1.67]     | 0.522    | 0.815   |
| P4HA1   | 101         | 1         | 0.99%         | 196          | 4         | 2.04%         | 2.08 [0.33-13.25]    | 0.514    | 0.805   |
| P4HA3   | 101         | 7         | 6.93%         | 196          | 14        | 7.14%         | 1.03 [0.47-2.28]     | 0.946    | 1.000   |
| P4HB    | 101         | 2         | 1.98%         | 196          | 13        | 6.63%         | 3.52 [0.99-12.47]    | 0.102    | 0.507   |
| POTEM   | 101         | 3         | 2.97%         | 196          | 2         | 1.02%         | 0.34 [0.074-1.53]    | 0.237    | 0.599   |
| PAAF1   | 101         | 7         | 6.93%         | 196          | 11        | 5.61%         | 0.80 [0.35-1.82]     | 0.652    | 0.928   |
| PABPC1L | 101         | 4         | 3.96%         | 196          | 4         | 2.04%         | 0.51 [0.16-1.65]     | 0.342    | 0.716   |
| PABPC1  | 101         | 15        | 14.85%        | 196          | 55        | 28.06%        | 2.24 [1.32-3.80]     | 1.24E-02 | 0.507   |
| PACS1   | 101         | 1         | 0.99%         | 196          | 5         | 2.55%         | 2.62 [0.43-16.05]    | 0.383    | 0.750   |
| PAG1    | 101         | 17        | 16.83%        | 196          | 48        | 24.49%        | 1.60 [0.96-2.68]     | 0.133    | 0.535   |
| PAK1    | 101         | 9         | 8.91%         | 196          | 23        | 11.73%        | 1.36 [0.69-2.68]     | 0.458    | 0.805   |
| PAK2    | 101         | 4         | 3.96%         | 196          | 4         | 2.04%         | 0.51 [0.16-1.65]     | 0.342    | 0.716   |
| PALB2   | 101         | 5         | 4.95%         | 196          | 3         | 1.53%         | 0.30 [0.088-1.01]    | 0.103    | 0.507   |
| PAPPA2  | 101         | 6         | 5.94%         | 196          | 16        | 8.16%         | 1.41 [0.62-3.18]     | 0.490    | 0.805   |
| PAQR4   | 101         | 6         | 5.94%         | 196          | 4         | 2.04%         | 0.33 [0.11-0.97]     | 0.092    | 0.507   |
| PAQR6   | 101         | 6         | 5.94%         | 196          | 9         | 4.59%         | 0.76 [0.31-1.86]     | 0.616    | 0.898   |
| PAWR    | 101         | 1         | 0.99%         | 196          | 4         | 2.04%         | 2.08 [0.33-13.25]    | 0.514    | 0.805   |
| PARD6B  | 101         | 5         | 4.95%         | 196          | 14        | 7.14%         | 1.48 [0.61-3.57]     | 0.467    | 0.805   |
| PARL    | 101         | 3         | 2.97%         | 196          | 2         | 1.02%         | 0.34 [0.074-1.53]    | 0.237    | 0.599   |
| PARM1   | 101         | 2         | 1.98%         | 196          | 4         | 2.04%         | 1.03 [0.24-4.35]     | 0.972    | 1.000   |
| PARN    | 101         | 6         | 5.94%         | 196          | 3         | 1.53%         | 0.25 [0.076-0.80]    | 0.051    | 0.507   |
| PARP10  | 101         | 17        | 16.83%        | 196          | 51        | 26.02%        | 1.74 [1.04-2.90]     | 0.076    | 0.507   |
| PARP1   | 101         | 6         | 5.94%         | 196          | 19        | 9.69%         | 1.70 [0.77-3.78]     | 0.274    | 0.643   |
| PARP6   | 101         | 1         | 0.99%         | 196          | 4         | 2.04%         | 2.08 [0.33-13.25]    | 0.514    | 0.805   |
| PAX9    | 101         | 0         | 0.00%         | 196          | 12        | 6.12%         | 5.6e+07 [0e+00-Inf]  | 0.992    | 1.000   |
| PBX1    | 101         | 6         | 5.94%         | 196          | 13        | 6.63%         | 1.12 [0.49-2.60]     | 0.817    | 1.000   |
| PBXIP1  | 101         | 8         | 7.92%         | 196          | 15        | 7.65%         | 0.96 [0.46-2.04]     | 0.935    | 1.000   |
| PCDH11Y | 101         | 0         | 0.00%         | 196          | 0         | 0.00%         | 1.00 [0e+00-Inf]     | 1.000    | 1.000   |
| PCF11   | 101         | 1         | 0.99%         | 196          | 4         | 2.04%         | 2.08 [0.33-13.25]    | 0.514    | 0.805   |
| PCGF2   | 101         | 5         | 4.95%         | 196          | 9         | 4.59%         | 0.92 [0.36-2.37]     | 0.890    | 1.000   |
| PCIF1   | 101         | 5         | 4.95%         | 196          | 4         | 2.04%         | 0.40 [0.13-1.23]     | 0.179    | 0.535   |
| PCK1    | 101         | 9         | 8.91%         | 196          | 16        | 8.16%         | 0.91 [0.44-1.86]     | 0.826    | 1.000   |
| PCMTD1  | 101         | 13        | 12.87%        | 196          | 27        | 13.78%        | 1.08 [0.60-1.96]     | 0.829    | 1.000   |
| PCMTD2  | 101         | 8         | 7.92%         | 196          | 10        | 5.10%         | 0.63 [0.28-1.40]     | 0.338    | 0.716   |
| PCP4L1  | 101         | 6         | 5.94%         | 196          | 16        | 8.16%         | 1.41 [0.62-3.18]     | 0.490    | 0.805   |
| PCSK6   | 101         | 1         | 0.99%         | 196          | 4         | 2.04%         | 2.08 [0.33-13.25]    | 0.514    | 0.805   |
| PCTP    | 101         | 8         | 7.92%         | 196          | 21        | 10.71%        | 1.39 [0.68-2.85]     | 0.444    | 0.805   |

| Symbol   | CINSARC Low |           |               | CINSARC High |           |               | CINSARC High vs. Low |          |         |
|----------|-------------|-----------|---------------|--------------|-----------|---------------|----------------------|----------|---------|
|          | N tested    | N altered | Fq alteration | N tested     | N altered | Fq alteration | OR [95%CI]           | p-value* | q-value |
| PCYT1A   | 101         | 4         | 3.96%         | 196          | 3         | 1.53%         | 0.38 [0.11-1.35]     | 0.207    | 0.573   |
| PCYT2    | 101         | 2         | 1.98%         | 196          | 13        | 6.63%         | 3.52 [0.99-12.47]    | 0.102    | 0.507   |
| PC       | 101         | 7         | 6.93%         | 196          | 13        | 6.63%         | 0.95 [0.43-2.12]     | 0.923    | 1.000   |
| PDC      | 101         | 5         | 4.95%         | 196          | 16        | 8.16%         | 1.71 [0.72-4.07]     | 0.311    | 0.680   |
| PDE1C    | 101         | 0         | 0.00%         | 196          | 8         | 4.08%         | 3.6e+07 [0e+00-Inf]  | 0.992    | 1.000   |
| PDE2A    | 101         | 5         | 4.95%         | 196          | 9         | 4.59%         | 0.92 [0.36-2.37]     | 0.890    | 1.000   |
| PDE4DIP  | 101         | 2         | 1.98%         | 196          | 4         | 2.04%         | 1.03 [0.24-4.35]     | 0.972    | 1.000   |
| PDE6G    | 101         | 2         | 1.98%         | 196          | 12        | 6.12%         | 3.23 [0.90-11.53]    | 0.130    | 0.535   |
| PDE7A    | 101         | 15        | 14.85%        | 196          | 35        | 17.86%        | 1.25 [0.72-2.17]     | 0.512    | 0.805   |
| PDE8A    | 101         | 1         | 0.99%         | 196          | 6         | 3.06%         | 3.16 [0.53-18.88]    | 0.290    | 0.650   |
| PDIA2    | 101         | 7         | 6.93%         | 196          | 4         | 2.04%         | 0.28 [0.098-0.80]    | 4.63E-02 | 0.507   |
| PDIA3P1  | 101         | 6         | 5.94%         | 196          | 12        | 6.12%         | 1.03 [0.44-2.41]     | 0.950    | 1.000   |
| PDILT    | 101         | 5         | 4.95%         | 196          | 3         | 1.53%         | 0.30 [0.088-1.01]    | 0.103    | 0.507   |
| PDK2     | 101         | 5         | 4.95%         | 196          | 17        | 8.67%         | 1.82 [0.77-4.32]     | 0.252    | 0.623   |
| PDP1     | 101         | 17        | 16.83%        | 196          | 53        | 27.04%        | 1.83 [1.10-3.05]     | 0.052    | 0.507   |
| PDPK1    | 101         | 6         | 5.94%         | 196          | 5         | 2.55%         | 0.41 [0.15-1.15]     | 0.154    | 0.535   |
| PDSS2    | 101         | 1         | 0.99%         | 196          | 8         | 4.08%         | 4.26 [0.73-24.65]    | 0.175    | 0.535   |
| PDXDC1   | 101         | 5         | 4.95%         | 196          | 3         | 1.53%         | 0.30 [0.088-1.01]    | 0.103    | 0.507   |
| PDZD9    | 101         | 5         | 4.95%         | 196          | 3         | 1.53%         | 0.30 [0.088-1.01]    | 0.103    | 0.507   |
| PDZK1P1  | 101         | 6         | 5.94%         | 196          | 11        | 5.61%         | 0.94 [0.40-2.23]     | 0.908    | 1.000   |
| PDZK1    | 101         | 5         | 4.95%         | 196          | 10        | 5.10%         | 1.03 [0.41-2.60]     | 0.955    | 1.000   |
| PEA15    | 101         | 6         | 5.94%         | 196          | 12        | 6.12%         | 1.03 [0.44-2.41]     | 0.950    | 1.000   |
| PEAR1    | 101         | 6         | 5.94%         | 196          | 8         | 4.08%         | 0.67 [0.27-1.68]     | 0.476    | 0.805   |
| PECAM1   | 101         | 7         | 6.93%         | 196          | 28        | 14.29%        | 2.24 [1.08-4.63]     | 0.068    | 0.507   |
| PELI3    | 101         | 5         | 4.95%         | 196          | 10        | 5.10%         | 1.03 [0.41-2.60]     | 0.955    | 1.000   |
| PENK     | 101         | 14        | 13.86%        | 196          | 31        | 15.82%        | 1.17 [0.66-2.07]     | 0.656    | 0.931   |
| PEX11A   | 101         | 1         | 0.99%         | 196          | 7         | 3.57%         | 3.70 [0.63-21.75]    | 0.224    | 0.596   |
| PEX11B   | 101         | 5         | 4.95%         | 196          | 10        | 5.10%         | 1.03 [0.41-2.60]     | 0.955    | 1.000   |
| PEX19    | 101         | 6         | 5.94%         | 196          | 13        | 6.63%         | 1.12 [0.49-2.60]     | 0.817    | 1.000   |
| PEX2     | 101         | 15        | 14.85%        | 196          | 48        | 24.49%        | 1.86 [1.09-3.18]     | 0.057    | 0.507   |
| PEX5L    | 101         | 4         | 3.96%         | 196          | 2         | 1.02%         | 0.25 [0.059-1.05]    | 0.113    | 0.511   |
| PF4V1    | 101         | 1         | 0.99%         | 196          | 6         | 3.06%         | 3.16 [0.53-18.88]    | 0.290    | 0.650   |
| PF4      | 101         | 2         | 1.98%         | 196          | 6         | 3.06%         | 1.56 [0.40-6.08]     | 0.589    | 0.869   |
| PFDN2    | 101         | 6         | 5.94%         | 196          | 17        | 8.67%         | 1.50 [0.67-3.38]     | 0.407    | 0.774   |
| PFDN4    | 101         | 12        | 11.88%        | 196          | 22        | 11.22%        | 0.94 [0.50-1.76]     | 0.866    | 1.000   |
| PFKFB2   | 101         | 6         | 5.94%         | 196          | 24        | 12.24%        | 2.21 [1.01-4.82]     | 0.095    | 0.507   |
| PGA3     | 101         | 2         | 1.98%         | 196          | 4         | 2.04%         | 1.03 [0.24-4.35]     | 0.972    | 1.000   |
| PGA4     | 101         | 2         | 1.98%         | 196          | 5         | 2.55%         | 1.30 [0.32-5.21]     | 0.759    | 0.996   |
| PGA5     | 101         | 2         | 1.98%         | 196          | 5         | 2.55%         | 1.30 [0.32-5.21]     | 0.759    | 0.996   |
| PGAP3    | 101         | 7         | 6.93%         | 196          | 12        | 6.12%         | 0.88 [0.39-1.97]     | 0.788    | 0.996   |
| PGBD2    | 101         | 5         | 4.95%         | 196          | 19        | 9.69%         | 2.06 [0.88-4.83]     | 0.163    | 0.535   |
| PGBD5    | 101         | 6         | 5.94%         | 196          | 19        | 9.69%         | 1.70 [0.77-3.78]     | 0.274    | 0.643   |
| CPQ      | 101         | 14        | 13.86%        | 196          | 53        | 27.04%        | 2.30 [1.34-3.96]     | 1.14E-02 | 0.507   |
| PGLYRP3  | 101         | 7         | 6.93%         | 196          | 12        | 6.12%         | 0.88 [0.39-1.97]     | 0.788    | 0.996   |
| PGLYRP4  | 101         | 7         | 6.93%         | 196          | 12        | 6.12%         | 0.88 [0.39-1.97]     | 0.788    | 0.996   |
| PGM2L1   | 101         | 7         | 6.93%         | 196          | 13        | 6.63%         | 0.95 [0.43-2.12]     | 0.923    | 1.000   |
| PGPEP1L  | 101         | 1         | 0.99%         | 196          | 10        | 5.10%         | 5.38 [0.95-30.54]    | 0.111    | 0.511   |
| PGP      | 101         | 6         | 5.94%         | 196          | 5         | 2.55%         | 0.41 [0.15-1.15]     | 0.154    | 0.535   |
| PGS1     | 101         | 3         | 2.97%         | 196          | 15        | 7.65%         | 2.71 [0.94-7.82]     | 0.122    | 0.534   |
| PHACTR1  | 101         | 1         | 0.99%         | 196          | 4         | 2.04%         | 2.08 [0.33-13.25]    | 0.514    | 0.805   |
| PHACTR3  | 101         | 10        | 9.90%         | 196          | 14        | 7.14%         | 0.70 [0.34-1.43]     | 0.411    | 0.774   |
| PHB      | 101         | 5         | 4.95%         | 196          | 18        | 9.18%         | 1.94 [0.82-4.58]     | 0.203    | 0.570   |
| PHF12    | 101         | 3         | 2.97%         | 196          | 7         | 3.57%         | 1.21 [0.38-3.83]     | 0.786    | 0.996   |
| PHF20L1  | 101         | 14        | 13.86%        | 196          | 59        | 30.10%        | 2.68 [1.56-4.59]     | 2.64E-03 | 0.507   |
| PHF20    | 101         | 4         | 3.96%         | 196          | 8         | 4.08%         | 1.03 [0.37-2.88]     | 0.960    | 1.000   |
| PHKB     | 101         | 1         | 0.99%         | 196          | 4         | 2.04%         | 2.08 [0.33-13.25]    | 0.514    | 0.805   |
| PHKG2    | 101         | 4         | 3.96%         | 196          | 5         | 2.55%         | 0.63 [0.21-1.95]     | 0.505    | 0.805   |
| PHLDA1   | 101         | 1         | 0.99%         | 196          | 4         | 2.04%         | 2.08 [0.33-13.25]    | 0.514    | 0.805   |
| PHLDA3   | 101         | 7         | 6.93%         | 196          | 23        | 11.73%        | 1.79 [0.85-3.74]     | 0.198    | 0.570   |
| PHOSPHO1 | 101         | 4         | 3.96%         | 196          | 17        | 8.67%         | 2.30 [0.90-5.88]     | 0.143    | 0.535   |
| PHOX2A   | 101         | 5         | 4.95%         | 196          | 9         | 4.59%         | 0.92 [0.36-2.37]     | 0.890    | 1.000   |
| PI15     | 101         | 14        | 13.86%        | 196          | 42        | 21.43%        | 1.69 [0.97-2.95]     | 0.117    | 0.524   |
| PI3      | 101         | 5         | 4.95%         | 196          | 3         | 1.53%         | 0.30 [0.088-1.01]    | 0.103    | 0.507   |
| PI4KB    | 101         | 6         | 5.94%         | 196          | 13        | 6.63%         | 1.12 [0.49-2.60]     | 0.817    | 1.000   |
| PIAS3    | 101         | 5         | 4.95%         | 196          | 10        | 5.10%         | 1.03 [0.41-2.60]     | 0.955    | 1.000   |
| PIGC     | 101         | 5         | 4.95%         | 196          | 14        | 7.14%         | 1.48 [0.61-3.57]     | 0.467    | 0.805   |
| PIGM     | 101         | 6         | 5.94%         | 196          | 11        | 5.61%         | 0.94 [0.40-2.23]     | 0.908    | 1.000   |
| PIGQ     | 101         | 7         | 6.93%         | 196          | 4         | 2.04%         | 0.28 [0.098-0.80]    | 4.63E-02 | 0.507   |
| PIGR     | 101         | 7         | 6.93%         | 196          | 25        | 12.76%        | 1.96 [0.94-4.09]     | 0.131    | 0.535   |
| PIGS     | 101         | 3         | 2.97%         | 196          | 8         | 4.08%         | 1.39 [0.45-4.31]     | 0.632    | 0.909   |
| PIGT     | 101         | 5         | 4.95%         | 196          | 3         | 1.53%         | 0.30 [0.088-1.01]    | 0.103    | 0.507   |

| Symbol    | CINSARC Low |           |               | CINSARC High |           |               | CINSARC High vs. Low |          |         |
|-----------|-------------|-----------|---------------|--------------|-----------|---------------|----------------------|----------|---------|
|           | N tested    | N altered | Fq alteration | N tested     | N altered | Fq alteration | OR [95%CI]           | p-value* | q-value |
| PIGU      | 101         | 3         | 2.97%         | 196          | 5         | 2.55%         | 0.86 [0.25-2.89]     | 0.833    | 1.000   |
| PIGW      | 101         | 2         | 1.98%         | 196          | 5         | 2.55%         | 1.30 [0.32-5.21]     | 0.759    | 0.996   |
| PIGX      | 101         | 4         | 3.96%         | 196          | 5         | 2.55%         | 0.63 [0.21-1.95]     | 0.505    | 0.805   |
| PIGZ      | 101         | 5         | 4.95%         | 196          | 4         | 2.04%         | 0.40 [0.13-1.23]     | 0.179    | 0.535   |
| PIK3C2B   | 101         | 7         | 6.93%         | 196          | 27        | 13.78%        | 2.15 [1.03-4.45]     | 0.085    | 0.507   |
| PIK3CA    | 101         | 4         | 3.96%         | 196          | 3         | 1.53%         | 0.38 [0.11-1.35]     | 0.207    | 0.573   |
| PIP4K2B   | 101         | 4         | 3.96%         | 196          | 10        | 5.10%         | 1.30 [0.48-3.53]     | 0.661    | 0.935   |
| PIP5K1A   | 101         | 6         | 5.94%         | 196          | 13        | 6.63%         | 1.12 [0.49-2.60]     | 0.817    | 1.000   |
| PIPOX     | 101         | 3         | 2.97%         | 196          | 7         | 3.57%         | 1.21 [0.38-3.83]     | 0.786    | 0.996   |
| PIP       | 101         | 2         | 1.98%         | 196          | 4         | 2.04%         | 1.03 [0.24-4.35]     | 0.972    | 1.000   |
| PITPNC1   | 101         | 9         | 8.91%         | 196          | 29        | 14.80%        | 1.78 [0.91-3.44]     | 0.155    | 0.535   |
| PITPNM1   | 101         | 11        | 10.89%        | 196          | 20        | 10.20%        | 0.93 [0.48-1.79]     | 0.854    | 1.000   |
| PKD1      | 101         | 6         | 5.94%         | 196          | 5         | 2.55%         | 0.41 [0.15-1.15]     | 0.154    | 0.535   |
| PKHD1L1   | 101         | 14        | 13.86%        | 196          | 54        | 27.55%        | 2.36 [1.37-4.06]     | 9.03E-03 | 0.507   |
| PKIA      | 101         | 14        | 13.86%        | 196          | 46        | 23.47%        | 1.91 [1.10-3.30]     | 0.053    | 0.507   |
| PKIG      | 101         | 5         | 4.95%         | 196          | 4         | 2.04%         | 0.40 [0.13-1.23]     | 0.179    | 0.535   |
| PKLR      | 101         | 7         | 6.93%         | 196          | 14        | 7.14%         | 1.03 [0.47-2.28]     | 0.946    | 1.000   |
| PKMYT1    | 101         | 6         | 5.94%         | 196          | 4         | 2.04%         | 0.33 [0.11-0.97]     | 0.092    | 0.507   |
| PKP1      | 101         | 6         | 5.94%         | 196          | 24        | 12.24%        | 2.21 [1.01-4.82]     | 0.095    | 0.507   |
| PLA2G10   | 101         | 9         | 8.91%         | 196          | 3         | 1.53%         | 0.16 [0.052-0.49]    | 6.71E-03 | 0.507   |
| PLA2G4A   | 101         | 4         | 3.96%         | 196          | 15        | 7.65%         | 2.01 [0.78-5.19]     | 0.226    | 0.598   |
| PLAG1     | 101         | 14        | 13.86%        | 196          | 31        | 15.82%        | 1.17 [0.66-2.07]     | 0.656    | 0.931   |
| PLAT      | 101         | 14        | 13.86%        | 196          | 33        | 16.84%        | 1.26 [0.71-2.22]     | 0.506    | 0.805   |
| PLAU      | 101         | 0         | 0.00%         | 196          | 5         | 2.55%         | 2.2e+07 [0e+00-Inf]  | 0.992    | 1.000   |
| PLCG1     | 101         | 3         | 2.97%         | 196          | 7         | 3.57%         | 1.21 [0.38-3.83]     | 0.786    | 0.996   |
| PLCXD1    | 101         | 2         | 1.98%         | 196          | 4         | 2.04%         | 1.03 [0.24-4.35]     | 0.972    | 1.000   |
| PLD5      | 101         | 4         | 3.96%         | 196          | 19        | 9.69%         | 2.60 [1.03-6.59]     | 0.090    | 0.507   |
| PLEC      | 101         | 17        | 16.83%        | 196          | 51        | 26.02%        | 1.74 [1.04-2.90]     | 0.076    | 0.507   |
| PLEKHA2   | 101         | 12        | 11.88%        | 196          | 39        | 19.90%        | 1.84 [1.03-3.31]     | 0.086    | 0.507   |
| PLEKHA6   | 101         | 7         | 6.93%         | 196          | 27        | 13.78%        | 2.15 [1.03-4.45]     | 0.085    | 0.507   |
| PLEKHA7   | 101         | 1         | 0.99%         | 196          | 4         | 2.04%         | 2.08 [0.33-13.25]    | 0.514    | 0.805   |
| PLEKHA8   | 101         | 0         | 0.00%         | 196          | 6         | 3.06%         | 2.7e+07 [0e+00-Inf]  | 0.992    | 1.000   |
| PLEKHB1   | 101         | 7         | 6.93%         | 196          | 12        | 6.12%         | 0.88 [0.39-1.97]     | 0.788    | 0.996   |
| PLEKHF2   | 101         | 16        | 15.84%        | 196          | 55        | 28.06%        | 2.07 [1.23-3.48]     | 2.09E-02 | 0.507   |
| PLEKHG7   | 101         | 0         | 0.00%         | 196          | 5         | 2.55%         | 2.2e+07 [0e+00-Inf]  | 0.992    | 1.000   |
| PLEKHO1   | 101         | 8         | 7.92%         | 196          | 14        | 7.14%         | 0.89 [0.42-1.91]     | 0.808    | 1.000   |
| PLIN1     | 101         | 1         | 0.99%         | 196          | 7         | 3.57%         | 3.70 [0.63-21.75]    | 0.224    | 0.596   |
| PLK1      | 101         | 5         | 4.95%         | 196          | 3         | 1.53%         | 0.30 [0.088-1.01]    | 0.103    | 0.507   |
| PLTP      | 101         | 5         | 4.95%         | 196          | 4         | 2.04%         | 0.40 [0.13-1.23]     | 0.179    | 0.535   |
| PLXDC1    | 101         | 4         | 3.96%         | 196          | 12        | 6.12%         | 1.58 [0.60-4.18]     | 0.438    | 0.798   |
| PLXNA2    | 101         | 6         | 5.94%         | 196          | 25        | 12.76%        | 2.31 [1.06-5.03]     | 0.076    | 0.507   |
| PM20D1    | 101         | 7         | 6.93%         | 196          | 24        | 12.24%        | 1.87 [0.90-3.92]     | 0.161    | 0.535   |
| PMAIP1    | 101         | 1         | 0.99%         | 196          | 4         | 2.04%         | 2.08 [0.33-13.25]    | 0.514    | 0.805   |
| PMEPA1    | 101         | 9         | 8.91%         | 196          | 16        | 8.16%         | 0.91 [0.44-1.86]     | 0.826    | 1.000   |
| PMF1      | 101         | 6         | 5.94%         | 196          | 9         | 4.59%         | 0.76 [0.31-1.86]     | 0.616    | 0.898   |
| PMM2      | 101         | 5         | 4.95%         | 196          | 4         | 2.04%         | 0.40 [0.13-1.23]     | 0.179    | 0.535   |
| PMP2      | 101         | 17        | 16.83%        | 196          | 47        | 23.98%        | 1.56 [0.93-2.61]     | 0.158    | 0.535   |
| PMVK      | 101         | 8         | 7.92%         | 196          | 15        | 7.65%         | 0.96 [0.46-2.04]     | 0.935    | 1.000   |
| PNMT      | 101         | 6         | 5.94%         | 196          | 12        | 6.12%         | 1.03 [0.44-2.41]     | 0.950    | 1.000   |
| PNPO      | 101         | 1         | 0.99%         | 196          | 9         | 4.59%         | 4.81 [0.84-27.58]    | 0.139    | 0.535   |
| POC1B     | 101         | 0         | 0.00%         | 196          | 5         | 2.55%         | 2.2e+07 [0e+00-Inf]  | 0.992    | 1.000   |
| POGK      | 101         | 5         | 4.95%         | 196          | 12        | 6.12%         | 1.25 [0.51-3.08]     | 0.681    | 0.943   |
| POGZ      | 101         | 6         | 5.94%         | 196          | 13        | 6.63%         | 1.12 [0.49-2.60]     | 0.817    | 1.000   |
| POLB      | 101         | 14        | 13.86%        | 196          | 32        | 16.33%        | 1.21 [0.69-2.15]     | 0.578    | 0.867   |
| POLD3     | 101         | 5         | 4.95%         | 196          | 12        | 6.12%         | 1.25 [0.51-3.08]     | 0.681    | 0.943   |
| POLD4     | 101         | 11        | 10.89%        | 196          | 17        | 8.67%         | 0.78 [0.40-1.52]     | 0.536    | 0.834   |
| POLDIP2   | 101         | 3         | 2.97%         | 196          | 7         | 3.57%         | 1.21 [0.38-3.83]     | 0.786    | 0.996   |
| POLG2     | 101         | 8         | 7.92%         | 196          | 26        | 13.27%        | 1.78 [0.88-3.57]     | 0.175    | 0.535   |
| POLG      | 101         | 1         | 0.99%         | 196          | 6         | 3.06%         | 3.16 [0.53-18.88]    | 0.290    | 0.650   |
| POLI      | 101         | 2         | 1.98%         | 196          | 3         | 1.53%         | 0.77 [0.17-3.50]     | 0.776    | 0.996   |
| POLR2H    | 101         | 3         | 2.97%         | 196          | 2         | 1.02%         | 0.34 [0.074-1.53]    | 0.237    | 0.599   |
| POLR2K    | 101         | 15        | 14.85%        | 196          | 54        | 27.55%        | 2.18 [1.28-3.70]     | 1.56E-02 | 0.507   |
| POLR3C    | 101         | 5         | 4.95%         | 196          | 10        | 5.10%         | 1.03 [0.41-2.60]     | 0.955    | 1.000   |
| POLR3E    | 101         | 5         | 4.95%         | 196          | 3         | 1.53%         | 0.30 [0.088-1.01]    | 0.103    | 0.507   |
| POLR3GL   | 101         | 5         | 4.95%         | 196          | 10        | 5.10%         | 1.03 [0.41-2.60]     | 0.955    | 1.000   |
| POLR3K    | 101         | 7         | 6.93%         | 196          | 4         | 2.04%         | 0.28 [0.098-0.80]    | 4.63E-02 | 0.507   |
| POM121L8P | 101         | 4         | 3.96%         | 196          | 2         | 1.02%         | 0.25 [0.059-1.05]    | 0.113    | 0.511   |
| POMP      | 101         | 0         | 0.00%         | 196          | 5         | 2.55%         | 2.2e+07 [0e+00-Inf]  | 0.992    | 1.000   |
| POP1      | 101         | 16        | 15.84%        | 196          | 54        | 27.55%        | 2.02 [1.20-3.40]     | 2.60E-02 | 0.507   |
| POPDC3    | 101         | 2         | 1.98%         | 196          | 6         | 3.06%         | 1.56 [0.40-6.08]     | 0.589    | 0.869   |
| POTEA     | 101         | 12        | 11.88%        | 196          | 24        | 12.24%        | 1.03 [0.56-1.92]     | 0.928    | 1.000   |

| Symbol   | CINSARC Low |           |               | CINSARC High |           |               | CINSARC High vs. Low |          |         |
|----------|-------------|-----------|---------------|--------------|-----------|---------------|----------------------|----------|---------|
|          | N tested    | N altered | Fq alteration | N tested     | N altered | Fq alteration | OR [95%CI]           | p-value* | q-value |
| POTEB    | 101         | 1         | 0.99%         | 196          | 4         | 2.04%         | 2.08 [0.33-13.25]    | 0.514    | 0.805   |
| POTEG    | 101         | 3         | 2.97%         | 196          | 6         | 3.06%         | 1.03 [0.32-3.36]     | 0.965    | 1.000   |
| POU2F1   | 101         | 5         | 4.95%         | 196          | 12        | 6.12%         | 1.25 [0.51-3.08]     | 0.681    | 0.943   |
| POU5F1B  | 101         | 14        | 13.86%        | 196          | 64        | 32.65%        | 3.01 [1.76-5.15]     | 7.10E-04 | 0.507   |
| PPBPP2   | 101         | 2         | 1.98%         | 196          | 6         | 3.06%         | 1.56 [0.40-6.08]     | 0.589    | 0.869   |
| PPBP     | 101         | 2         | 1.98%         | 196          | 6         | 3.06%         | 1.56 [0.40-6.08]     | 0.589    | 0.869   |
| PPDPF    | 101         | 6         | 5.94%         | 196          | 14        | 7.14%         | 1.22 [0.53-2.79]     | 0.696    | 0.951   |
| PPEF2    | 101         | 2         | 1.98%         | 196          | 5         | 2.55%         | 1.30 [0.32-5.21]     | 0.759    | 0.996   |
| PPFIA1   | 101         | 19        | 18.81%        | 196          | 53        | 27.04%        | 1.60 [0.97-2.62]     | 0.119    | 0.530   |
| PPFIA2   | 101         | 1         | 0.99%         | 196          | 4         | 2.04%         | 2.08 [0.33-13.25]    | 0.514    | 0.805   |
| PPFIA4   | 101         | 7         | 6.93%         | 196          | 27        | 13.78%        | 2.15 [1.03-4.45]     | 0.085    | 0.507   |
| PPIAL4D  | 101         | 4         | 3.96%         | 196          | 8         | 4.08%         | 1.03 [0.37-2.88]     | 0.960    | 1.000   |
| PPIAL4E  | 101         | 4         | 3.96%         | 196          | 8         | 4.08%         | 1.03 [0.37-2.88]     | 0.960    | 1.000   |
| PPL      | 101         | 5         | 4.95%         | 196          | 5         | 2.55%         | 0.50 [0.17-1.45]     | 0.286    | 0.650   |
| PPM1D    | 101         | 8         | 7.92%         | 196          | 34        | 17.35%        | 2.44 [1.23-4.82]     | 3.12E-02 | 0.507   |
| PPM1E    | 101         | 7         | 6.93%         | 196          | 29        | 14.80%        | 2.33 [1.13-4.81]     | 0.055    | 0.507   |
| PPM1H    | 101         | 0         | 0.00%         | 196          | 6         | 3.06%         | 2.7e+07 [0e+00-Inf]  | 0.992    | 1.000   |
| PPME1    | 101         | 7         | 6.93%         | 196          | 13        | 6.63%         | 0.95 [0.43-2.12]     | 0.923    | 1.000   |
| PPOX     | 101         | 6         | 5.94%         | 196          | 16        | 8.16%         | 1.41 [0.62-3.18]     | 0.490    | 0.805   |
| PPP1CA   | 101         | 11        | 10.89%        | 196          | 18        | 9.18%         | 0.83 [0.43-1.61]     | 0.639    | 0.918   |
| PPP1R12A | 101         | 1         | 0.99%         | 196          | 4         | 2.04%         | 2.08 [0.33-13.25]    | 0.514    | 0.805   |
| PPP1R12B | 101         | 7         | 6.93%         | 196          | 26        | 13.27%        | 2.05 [0.99-4.27]     | 0.106    | 0.507   |
| PPP1R15B | 101         | 7         | 6.93%         | 196          | 27        | 13.78%        | 2.15 [1.03-4.45]     | 0.085    | 0.507   |
| PPP1R16A | 101         | 17        | 16.83%        | 196          | 49        | 25.00%        | 1.65 [0.98-2.76]     | 0.111    | 0.511   |
| PPP1R16B | 101         | 2         | 1.98%         | 196          | 5         | 2.55%         | 1.30 [0.32-5.21]     | 0.759    | 0.996   |
| PPP1R1B  | 101         | 6         | 5.94%         | 196          | 12        | 6.12%         | 1.03 [0.44-2.41]     | 0.950    | 1.000   |
| PPP1R2   | 101         | 3         | 2.97%         | 196          | 3         | 1.53%         | 0.51 [0.13-1.98]     | 0.412    | 0.774   |
| PPP1R3D  | 101         | 10        | 9.90%         | 196          | 13        | 6.63%         | 0.65 [0.31-1.33]     | 0.321    | 0.700   |
| PPP1R9B  | 101         | 5         | 4.95%         | 196          | 17        | 8.67%         | 1.82 [0.77-4.32]     | 0.252    | 0.623   |
| PPP2CB   | 101         | 2         | 1.98%         | 196          | 6         | 3.06%         | 1.56 [0.40-6.08]     | 0.589    | 0.869   |
| PPP2R3B  | 101         | 2         | 1.98%         | 196          | 4         | 2.04%         | 1.03 [0.24-4.35]     | 0.972    | 1.000   |
| PPP2R3C  | 101         | 0         | 0.00%         | 196          | 10        | 5.10%         | 4.6e+07 [0e+00-Inf]  | 0.992    | 1.000   |
| PPP2R5A  | 101         | 7         | 6.93%         | 196          | 21        | 10.71%        | 1.61 [0.76-3.40]     | 0.294    | 0.650   |
| PPP3CB   | 101         | 0         | 0.00%         | 196          | 5         | 2.55%         | 2.2e+07 [0e+00-Inf]  | 0.992    | 1.000   |
| PPP4C    | 101         | 5         | 4.95%         | 196          | 4         | 2.04%         | 0.40 [0.13-1.23]     | 0.179    | 0.535   |
| PPP4R1L  | 101         | 9         | 8.91%         | 196          | 17        | 8.67%         | 0.97 [0.48-1.97]     | 0.945    | 1.000   |
| DES12    | 101         | 5         | 4.95%         | 196          | 19        | 9.69%         | 2.06 [0.88-4.83]     | 0.163    | 0.535   |
| PRAC1    | 101         | 2         | 1.98%         | 196          | 17        | 8.67%         | 4.70 [1.35-16.35]    | 4.11E-02 | 0.507   |
| PRCC     | 101         | 7         | 6.93%         | 196          | 8         | 4.08%         | 0.57 [0.24-1.37]     | 0.294    | 0.650   |
| PRCD     | 101         | 3         | 2.97%         | 196          | 15        | 7.65%         | 2.71 [0.94-7.82]     | 0.122    | 0.534   |
| PRCP     | 101         | 2         | 1.98%         | 196          | 4         | 2.04%         | 1.03 [0.24-4.35]     | 0.972    | 1.000   |
| PRDM14   | 101         | 16        | 15.84%        | 196          | 39        | 19.90%        | 1.32 [0.77-2.26]     | 0.395    | 0.770   |
| PRDM1    | 101         | 2         | 1.98%         | 196          | 7         | 3.57%         | 1.83 [0.48-6.96]     | 0.455    | 0.805   |
| PRDX6    | 101         | 5         | 4.95%         | 196          | 13        | 6.63%         | 1.36 [0.56-3.32]     | 0.566    | 0.852   |
| PRELP    | 101         | 7         | 6.93%         | 196          | 28        | 14.29%        | 2.24 [1.08-4.63]     | 0.068    | 0.507   |
| PREP     | 101         | 2         | 1.98%         | 196          | 7         | 3.57%         | 1.83 [0.48-6.96]     | 0.455    | 0.805   |
| PREX1    | 101         | 6         | 5.94%         | 196          | 8         | 4.08%         | 0.67 [0.27-1.68]     | 0.476    | 0.805   |
| PREX2    | 101         | 14        | 13.86%        | 196          | 35        | 17.86%        | 1.35 [0.77-2.38]     | 0.381    | 0.750   |
| PRG4     | 101         | 5         | 4.95%         | 196          | 16        | 8.16%         | 1.71 [0.72-4.07]     | 0.311    | 0.680   |
| HELZ2    | 101         | 6         | 5.94%         | 196          | 15        | 7.65%         | 1.31 [0.58-2.98]     | 0.586    | 0.869   |
| PRKAB2   | 101         | 6         | 5.94%         | 196          | 12        | 6.12%         | 1.03 [0.44-2.41]     | 0.950    | 1.000   |
| PRKAR1A  | 101         | 8         | 7.92%         | 196          | 25        | 12.76%        | 1.70 [0.84-3.43]     | 0.213    | 0.588   |
| PRKCA    | 101         | 8         | 7.92%         | 196          | 29        | 14.80%        | 2.02 [1.01-4.03]     | 0.094    | 0.507   |
| PRKCB    | 101         | 5         | 4.95%         | 196          | 3         | 1.53%         | 0.30 [0.088-1.01]    | 0.103    | 0.507   |
| PRKCI    | 101         | 2         | 1.98%         | 196          | 3         | 1.53%         | 0.77 [0.17-3.50]     | 0.776    | 0.996   |
| PRKD1    | 101         | 1         | 0.99%         | 196          | 6         | 3.06%         | 3.16 [0.53-18.88]    | 0.290    | 0.650   |
| PRKDC    | 101         | 14        | 13.86%        | 196          | 27        | 13.78%        | 0.99 [0.55-1.78]     | 0.984    | 1.000   |
| PRKY     | 101         | 0         | 0.00%         | 196          | 0         | 0.00%         | 1.00 [0e+00-Inf]     | 1.000    | 1.000   |
| PRM1     | 101         | 5         | 4.95%         | 196          | 4         | 2.04%         | 0.40 [0.13-1.23]     | 0.179    | 0.535   |
| PRM2     | 101         | 5         | 4.95%         | 196          | 4         | 2.04%         | 0.40 [0.13-1.23]     | 0.179    | 0.535   |
| PRM3     | 101         | 5         | 4.95%         | 196          | 4         | 2.04%         | 0.40 [0.13-1.23]     | 0.179    | 0.535   |
| PROCA1   | 101         | 3         | 2.97%         | 196          | 8         | 4.08%         | 1.39 [0.45-4.31]     | 0.632    | 0.909   |
| PROCR    | 101         | 4         | 3.96%         | 196          | 6         | 3.06%         | 0.77 [0.26-2.26]     | 0.685    | 0.943   |
| PROX1    | 101         | 6         | 5.94%         | 196          | 22        | 11.22%        | 2.00 [0.91-4.39]     | 0.146    | 0.535   |
| PRPF3    | 101         | 8         | 7.92%         | 196          | 15        | 7.65%         | 0.96 [0.46-2.04]     | 0.935    | 1.000   |
| PRPF6    | 101         | 7         | 6.93%         | 196          | 11        | 5.61%         | 0.80 [0.35-1.82]     | 0.652    | 0.928   |
| PRPSAP1  | 101         | 3         | 2.97%         | 196          | 13        | 6.63%         | 2.32 [0.79-6.79]     | 0.197    | 0.570   |
| PRR11    | 101         | 8         | 7.92%         | 196          | 29        | 14.80%        | 2.02 [1.01-4.03]     | 0.094    | 0.507   |
| PRR14    | 101         | 4         | 3.96%         | 196          | 5         | 2.55%         | 0.63 [0.21-1.95]     | 0.505    | 0.805   |
| PRR15L   | 101         | 1         | 0.99%         | 196          | 9         | 4.59%         | 4.81 [0.84-27.58]    | 0.139    | 0.535   |
| PRR15    | 101         | 0         | 0.00%         | 196          | 6         | 3.06%         | 2.7e+07 [0e+00-Inf]  | 0.992    | 1.000   |

| Symbol           | CINSARC Low |           |               | CINSARC High |           |               | CINSARC High vs. Low |          |         |
|------------------|-------------|-----------|---------------|--------------|-----------|---------------|----------------------|----------|---------|
|                  | N tested    | N altered | Fq alteration | N tested     | N altered | Fq alteration | OR [95%CI]           | p-value* | q-value |
| <i>PRR25</i>     | 101         | 6         | 5.94%         | 196          | 4         | 2.04%         | 0.33 [0.11-0.97]     | 0.092    | 0.507   |
| <i>PRRT2</i>     | 101         | 5         | 4.95%         | 196          | 3         | 1.53%         | 0.30 [0.088-1.01]    | 0.103    | 0.507   |
| <i>PRRX1</i>     | 101         | 4         | 3.96%         | 196          | 13        | 6.63%         | 1.72 [0.66-4.51]     | 0.353    | 0.722   |
| <i>PRSS1</i>     | 101         | 2         | 1.98%         | 196          | 5         | 2.55%         | 1.30 [0.32-5.21]     | 0.759    | 0.996   |
| <i>PRSS21</i>    | 101         | 6         | 5.94%         | 196          | 5         | 2.55%         | 0.41 [0.15-1.15]     | 0.154    | 0.535   |
| <i>PRSS22</i>    | 101         | 6         | 5.94%         | 196          | 5         | 2.55%         | 0.41 [0.15-1.15]     | 0.154    | 0.535   |
| <i>PRSS23</i>    | 101         | 1         | 0.99%         | 196          | 4         | 2.04%         | 2.08 [0.33-13.25]    | 0.514    | 0.805   |
| <i>PRSS27</i>    | 101         | 6         | 5.94%         | 196          | 5         | 2.55%         | 0.41 [0.15-1.15]     | 0.154    | 0.535   |
| <i>PRSS30P</i>   | 101         | 6         | 5.94%         | 196          | 5         | 2.55%         | 0.41 [0.15-1.15]     | 0.154    | 0.535   |
| <i>PRSS33</i>    | 101         | 6         | 5.94%         | 196          | 5         | 2.55%         | 0.41 [0.15-1.15]     | 0.154    | 0.535   |
| <i>PRSS36</i>    | 101         | 4         | 3.96%         | 196          | 5         | 2.55%         | 0.63 [0.21-1.95]     | 0.505    | 0.805   |
| <i>PRSS38</i>    | 101         | 7         | 6.93%         | 196          | 21        | 10.71%        | 1.61 [0.76-3.40]     | 0.294    | 0.650   |
| <i>PRSS41</i>    | 101         | 6         | 5.94%         | 196          | 5         | 2.55%         | 0.41 [0.15-1.15]     | 0.154    | 0.535   |
| <i>PRSS53</i>    | 101         | 4         | 3.96%         | 196          | 6         | 3.06%         | 0.77 [0.26-2.26]     | 0.685    | 0.943   |
| <i>PRSS8</i>     | 101         | 4         | 3.96%         | 196          | 5         | 2.55%         | 0.63 [0.21-1.95]     | 0.505    | 0.805   |
| <i>PRY2</i>      | 101         | 0         | 0.00%         | 196          | 0         | 0.00%         | 1.00 [0e+00-Inf]     | 1.000    | 1.000   |
| <i>PSAP</i>      | 101         | 0         | 0.00%         | 196          | 5         | 2.55%         | 2.2e+07 [0e+00-Inf]  | 0.992    | 1.000   |
| <i>PSCA</i>      | 101         | 16        | 15.84%        | 196          | 49        | 25.00%        | 1.77 [1.05-2.99]     | 0.073    | 0.507   |
| <i>PSEN2</i>     | 101         | 6         | 5.94%         | 196          | 19        | 9.69%         | 1.70 [0.77-3.78]     | 0.274    | 0.643   |
| <i>PSKH2</i>     | 101         | 18        | 17.82%        | 196          | 47        | 23.98%        | 1.45 [0.87-2.42]     | 0.226    | 0.598   |
| <i>PSMA6</i>     | 101         | 0         | 0.00%         | 196          | 9         | 4.59%         | 4.1e+07 [0e+00-Inf]  | 0.992    | 1.000   |
| <i>PSMA7</i>     | 101         | 7         | 6.93%         | 196          | 12        | 6.12%         | 0.88 [0.39-1.97]     | 0.788    | 0.996   |
| <i>PSMB11</i>    | 101         | 1         | 0.99%         | 196          | 4         | 2.04%         | 2.08 [0.33-13.25]    | 0.514    | 0.805   |
| <i>PSMB3</i>     | 101         | 5         | 4.95%         | 196          | 9         | 4.59%         | 0.92 [0.36-2.37]     | 0.890    | 1.000   |
| <i>PSMB4</i>     | 101         | 6         | 5.94%         | 196          | 13        | 6.63%         | 1.12 [0.49-2.60]     | 0.817    | 1.000   |
| <i>PSMB5</i>     | 101         | 1         | 0.99%         | 196          | 4         | 2.04%         | 2.08 [0.33-13.25]    | 0.514    | 0.805   |
| <i>PSMC5</i>     | 101         | 8         | 7.92%         | 196          | 29        | 14.80%        | 2.02 [1.01-4.03]     | 0.094    | 0.507   |
| <i>PSMD11</i>    | 101         | 2         | 1.98%         | 196          | 5         | 2.55%         | 1.30 [0.32-5.21]     | 0.759    | 0.996   |
| <i>PSMD12</i>    | 101         | 10        | 9.90%         | 196          | 27        | 13.78%        | 1.45 [0.76-2.77]     | 0.340    | 0.716   |
| <i>PSMD2</i>     | 101         | 3         | 2.97%         | 196          | 2         | 1.02%         | 0.34 [0.074-1.53]    | 0.237    | 0.599   |
| <i>PSMD3</i>     | 101         | 5         | 4.95%         | 196          | 10        | 5.10%         | 1.03 [0.41-2.60]     | 0.955    | 1.000   |
| <i>PSMD4</i>     | 101         | 6         | 5.94%         | 196          | 13        | 6.63%         | 1.12 [0.49-2.60]     | 0.817    | 1.000   |
| <i>PTDSS1</i>    | 101         | 16        | 15.84%        | 196          | 53        | 27.04%        | 1.97 [1.17-3.31]     | 3.23E-02 | 0.507   |
| <i>PTGIS</i>     | 101         | 7         | 6.93%         | 196          | 10        | 5.10%         | 0.72 [0.31-1.67]     | 0.522    | 0.815   |
| <i>PTGS2</i>     | 101         | 5         | 4.95%         | 196          | 15        | 7.65%         | 1.59 [0.66-3.81]     | 0.382    | 0.750   |
| <i>PTK2</i>      | 101         | 18        | 17.82%        | 196          | 48        | 24.49%        | 1.50 [0.90-2.48]     | 0.192    | 0.563   |
| <i>PTK6</i>      | 101         | 6         | 5.94%         | 196          | 14        | 7.14%         | 1.22 [0.53-2.79]     | 0.696    | 0.951   |
| <i>PTP4A3</i>    | 101         | 18        | 17.82%        | 196          | 48        | 24.49%        | 1.50 [0.90-2.48]     | 0.192    | 0.563   |
| <i>PTPN14</i>    | 101         | 6         | 5.94%         | 196          | 21        | 10.71%        | 1.90 [0.86-4.19]     | 0.181    | 0.535   |
| <i>PTPN1</i>     | 101         | 6         | 5.94%         | 196          | 16        | 8.16%         | 1.41 [0.62-3.18]     | 0.490    | 0.805   |
| <i>PTPN5</i>     | 101         | 1         | 0.99%         | 196          | 4         | 2.04%         | 2.08 [0.33-13.25]    | 0.514    | 0.805   |
| <i>PTPN7</i>     | 101         | 8         | 7.92%         | 196          | 24        | 12.24%        | 1.62 [0.80-3.28]     | 0.258    | 0.635   |
| <i>PTPRB</i>     | 101         | 3         | 2.97%         | 196          | 14        | 7.14%         | 2.51 [0.86-7.30]     | 0.155    | 0.535   |
| <i>PTPRCAP</i>   | 101         | 11        | 10.89%        | 196          | 20        | 10.20%        | 0.93 [0.48-1.79]     | 0.854    | 1.000   |
| <i>PTPRC</i>     | 101         | 5         | 4.95%         | 196          | 23        | 11.73%        | 2.55 [1.10-5.90]     | 0.066    | 0.507   |
| <i>PTPRR</i>     | 101         | 3         | 2.97%         | 196          | 14        | 7.14%         | 2.51 [0.86-7.30]     | 0.155    | 0.535   |
| <i>PTPRT</i>     | 101         | 2         | 1.98%         | 196          | 5         | 2.55%         | 1.30 [0.32-5.21]     | 0.759    | 0.996   |
| <i>PTPRVP</i>    | 101         | 8         | 7.92%         | 196          | 24        | 12.24%        | 1.62 [0.80-3.28]     | 0.258    | 0.635   |
| <i>PTRH2</i>     | 101         | 9         | 8.91%         | 196          | 33        | 16.84%        | 2.07 [1.08-3.98]     | 0.068    | 0.507   |
| <i>PTTG3P</i>    | 101         | 15        | 14.85%        | 196          | 39        | 19.90%        | 1.42 [0.82-2.46]     | 0.287    | 0.650   |
| <i>PTX4</i>      | 101         | 7         | 6.93%         | 196          | 5         | 2.55%         | 0.35 [0.13-0.94]     | 0.081    | 0.507   |
| <i>PUF60</i>     | 101         | 16        | 15.84%        | 196          | 51        | 26.02%        | 1.87 [1.11-3.15]     | 4.89E-02 | 0.507   |
| <i>PURG</i>      | 101         | 2         | 1.98%         | 196          | 6         | 3.06%         | 1.56 [0.40-6.08]     | 0.589    | 0.869   |
| <i>PVT1</i>      | 101         | 14        | 13.86%        | 196          | 65        | 33.16%        | 3.08 [1.81-5.27]     | 5.41E-04 | 0.507   |
| <i>PXDNL</i>     | 101         | 13        | 12.87%        | 196          | 27        | 13.78%        | 1.08 [0.60-1.96]     | 0.829    | 1.000   |
| <i>PYCARD</i>    | 101         | 4         | 3.96%         | 196          | 5         | 2.55%         | 0.63 [0.21-1.95]     | 0.505    | 0.805   |
| <i>PYCR1</i>     | 101         | 2         | 1.98%         | 196          | 13        | 6.63%         | 3.52 [0.99-12.47]    | 0.102    | 0.507   |
| <i>PYCR2</i>     | 101         | 6         | 5.94%         | 196          | 19        | 9.69%         | 1.70 [0.77-3.78]     | 0.274    | 0.643   |
| <i>PYDC1</i>     | 101         | 4         | 3.96%         | 196          | 5         | 2.55%         | 0.63 [0.21-1.95]     | 0.505    | 0.805   |
| <i>PYDC2</i>     | 101         | 3         | 2.97%         | 196          | 3         | 1.53%         | 0.51 [0.13-1.98]     | 0.412    | 0.774   |
| <i>PYGO2</i>     | 101         | 8         | 7.92%         | 196          | 15        | 7.65%         | 0.96 [0.46-2.04]     | 0.935    | 1.000   |
| <i>PYHIN1</i>    | 101         | 6         | 5.94%         | 196          | 8         | 4.08%         | 0.67 [0.27-1.68]     | 0.476    | 0.805   |
| <i>PYY2</i>      | 101         | 4         | 3.96%         | 196          | 6         | 3.06%         | 0.77 [0.26-2.26]     | 0.685    | 0.943   |
| <i>QPRT</i>      | 101         | 5         | 4.95%         | 196          | 3         | 1.53%         | 0.30 [0.088-1.01]    | 0.103    | 0.507   |
| <i>QRICH2</i>    | 101         | 3         | 2.97%         | 196          | 13        | 6.63%         | 2.32 [0.79-6.79]     | 0.197    | 0.570   |
| <i>QRSL1</i>     | 101         | 1         | 0.99%         | 196          | 7         | 3.57%         | 3.70 [0.63-21.75]    | 0.224    | 0.596   |
| <i>QSER1</i>     | 101         | 1         | 0.99%         | 196          | 4         | 2.04%         | 2.08 [0.33-13.25]    | 0.514    | 0.805   |
| <i>QSOX1</i>     | 101         | 6         | 5.94%         | 196          | 19        | 9.69%         | 1.70 [0.77-3.78]     | 0.274    | 0.643   |
| <i>R3HDML</i>    | 101         | 2         | 1.98%         | 196          | 4         | 2.04%         | 1.03 [0.24-4.35]     | 0.972    | 1.000   |
| <i>RAB11FIP1</i> | 101         | 10        | 9.90%         | 196          | 51        | 26.02%        | 3.20 [1.74-5.89]     | 1.70E-03 | 0.507   |
| <i>RAB11FIP3</i> | 101         | 7         | 6.93%         | 196          | 4         | 2.04%         | 0.28 [0.098-0.80]    | 4.63E-02 | 0.507   |

| Symbol   | CINSARC Low |           |               | CINSARC High |           |               | CINSARC High vs. Low |          |         |
|----------|-------------|-----------|---------------|--------------|-----------|---------------|----------------------|----------|---------|
|          | N tested    | N altered | Fq alteration | N tested     | N altered | Fq alteration | OR [95%CI]           | p-value* | q-value |
| RAB13    | 101         | 7         | 6.93%         | 196          | 13        | 6.63%         | 0.95 [0.43-2.12]     | 0.923    | 1.000   |
| RAB19    | 101         | 1         | 0.99%         | 196          | 4         | 2.04%         | 2.08 [0.33-13.25]    | 0.514    | 0.805   |
| RAB1B    | 101         | 3         | 2.97%         | 196          | 5         | 2.55%         | 0.86 [0.25-2.89]     | 0.833    | 1.000   |
| RAB21    | 101         | 1         | 0.99%         | 196          | 12        | 6.12%         | 6.52 [1.16-36.57]    | 0.074    | 0.507   |
| RAB22A   | 101         | 9         | 8.91%         | 196          | 17        | 8.67%         | 0.97 [0.48-1.97]     | 0.945    | 1.000   |
| RAB25    | 101         | 6         | 5.94%         | 196          | 9         | 4.59%         | 0.76 [0.31-1.86]     | 0.616    | 0.898   |
| RAB26    | 101         | 6         | 5.94%         | 196          | 5         | 2.55%         | 0.41 [0.15-1.15]     | 0.154    | 0.535   |
| RAB27B   | 101         | 2         | 1.98%         | 196          | 3         | 1.53%         | 0.77 [0.17-3.50]     | 0.776    | 0.996   |
| RAB2A    | 101         | 16        | 15.84%        | 196          | 32        | 16.33%        | 1.04 [0.60-1.80]     | 0.914    | 1.000   |
| RAB30    | 101         | 1         | 0.99%         | 196          | 4         | 2.04%         | 2.08 [0.33-13.25]    | 0.514    | 0.805   |
| RAB34    | 101         | 3         | 2.97%         | 196          | 8         | 4.08%         | 1.39 [0.45-4.31]     | 0.632    | 0.909   |
| RAB37    | 101         | 5         | 4.95%         | 196          | 14        | 7.14%         | 1.48 [0.61-3.57]     | 0.467    | 0.805   |
| RAB38    | 101         | 1         | 0.99%         | 196          | 4         | 2.04%         | 2.08 [0.33-13.25]    | 0.514    | 0.805   |
| RAB3GAP2 | 101         | 6         | 5.94%         | 196          | 19        | 9.69%         | 1.70 [0.77-3.78]     | 0.274    | 0.643   |
| RAB3IP   | 101         | 2         | 1.98%         | 196          | 15        | 7.65%         | 4.10 [1.17-14.39]    | 0.064    | 0.507   |
| RAB40B   | 101         | 2         | 1.98%         | 196          | 14        | 7.14%         | 3.81 [1.08-13.43]    | 0.081    | 0.507   |
| RAB40C   | 101         | 6         | 5.94%         | 196          | 4         | 2.04%         | 0.33 [0.11-0.97]     | 0.092    | 0.507   |
| RAB4A    | 101         | 6         | 5.94%         | 196          | 19        | 9.69%         | 1.70 [0.77-3.78]     | 0.274    | 0.643   |
| RAB6A    | 101         | 8         | 7.92%         | 196          | 11        | 5.61%         | 0.69 [0.31-1.53]     | 0.443    | 0.805   |
| RABEP2   | 101         | 6         | 5.94%         | 196          | 3         | 1.53%         | 0.25 [0.076-0.80]    | 0.051    | 0.507   |
| RABGAP1L | 101         | 4         | 3.96%         | 196          | 11        | 5.61%         | 1.44 [0.54-3.85]     | 0.540    | 0.837   |
| RABIF    | 101         | 7         | 6.93%         | 196          | 28        | 14.29%        | 2.24 [1.08-4.63]     | 0.068    | 0.507   |
| RAC3     | 101         | 2         | 1.98%         | 196          | 13        | 6.63%         | 3.52 [0.99-12.47]    | 0.102    | 0.507   |
| RAD21    | 101         | 16        | 15.84%        | 196          | 58        | 29.59%        | 2.23 [1.33-3.74]     | 1.06E-02 | 0.507   |
| RAD51C   | 101         | 7         | 6.93%         | 196          | 28        | 14.29%        | 2.24 [1.08-4.63]     | 0.068    | 0.507   |
| RAD51D   | 101         | 1         | 0.99%         | 196          | 6         | 3.06%         | 3.16 [0.53-18.88]    | 0.290    | 0.650   |
| RAD54B   | 101         | 17        | 16.83%        | 196          | 52        | 26.53%        | 1.78 [1.07-2.98]     | 0.063    | 0.507   |
| RAD9A    | 101         | 11        | 10.89%        | 196          | 18        | 9.18%         | 0.83 [0.43-1.61]     | 0.639    | 0.918   |
| RAE1     | 101         | 9         | 8.91%         | 196          | 17        | 8.67%         | 0.97 [0.48-1.97]     | 0.945    | 1.000   |
| SLC50A1  | 101         | 7         | 6.93%         | 196          | 13        | 6.63%         | 0.95 [0.43-2.12]     | 0.923    | 1.000   |
| RALA     | 101         | 1         | 0.99%         | 196          | 4         | 2.04%         | 2.08 [0.33-13.25]    | 0.514    | 0.805   |
| RALGAPA1 | 101         | 0         | 0.00%         | 196          | 9         | 4.59%         | 4.1e+07 [0e+00-Inf]  | 0.992    | 1.000   |
| RALGAPB  | 101         | 4         | 3.96%         | 196          | 4         | 2.04%         | 0.51 [0.16-1.65]     | 0.342    | 0.716   |
| RALGPS2  | 101         | 5         | 4.95%         | 196          | 17        | 8.67%         | 1.82 [0.77-4.32]     | 0.252    | 0.623   |
| RALYL    | 101         | 15        | 14.85%        | 196          | 43        | 21.94%        | 1.61 [0.94-2.77]     | 0.147    | 0.535   |
| RAP1B    | 101         | 2         | 1.98%         | 196          | 17        | 8.67%         | 4.70 [1.35-16.35]    | 4.11E-02 | 0.507   |
| RAPGEF5  | 101         | 0         | 0.00%         | 196          | 6         | 3.06%         | 2.7e+07 [0e+00-Inf]  | 0.992    | 1.000   |
| RAPGEFL1 | 101         | 5         | 4.95%         | 196          | 9         | 4.59%         | 0.92 [0.36-2.37]     | 0.890    | 1.000   |
| RARA     | 101         | 4         | 3.96%         | 196          | 7         | 3.57%         | 0.90 [0.31-2.57]     | 0.867    | 1.000   |
| RASAL2   | 101         | 5         | 4.95%         | 196          | 17        | 8.67%         | 1.82 [0.77-4.32]     | 0.252    | 0.623   |
| RASL10B  | 101         | 2         | 1.98%         | 196          | 4         | 2.04%         | 1.03 [0.24-4.35]     | 0.972    | 1.000   |
| RASSF3   | 101         | 1         | 0.99%         | 196          | 5         | 2.55%         | 2.62 [0.43-16.05]    | 0.383    | 0.750   |
| RASSF5   | 101         | 6         | 5.94%         | 196          | 25        | 12.76%        | 2.31 [1.06-5.03]     | 0.076    | 0.507   |
| RASSF6   | 101         | 1         | 0.99%         | 196          | 6         | 3.06%         | 3.16 [0.53-18.88]    | 0.290    | 0.650   |
| RAX      | 101         | 1         | 0.99%         | 196          | 4         | 2.04%         | 2.08 [0.33-13.25]    | 0.514    | 0.805   |
| RB1CC1   | 101         | 12        | 11.88%        | 196          | 28        | 14.29%        | 1.24 [0.67-2.27]     | 0.566    | 0.852   |
| RBBP5    | 101         | 7         | 6.93%         | 196          | 26        | 13.27%        | 2.05 [0.99-4.27]     | 0.106    | 0.507   |
| RBBP6    | 101         | 5         | 4.95%         | 196          | 3         | 1.53%         | 0.30 [0.088-1.01]    | 0.103    | 0.507   |
| RBL1     | 101         | 3         | 2.97%         | 196          | 2         | 1.02%         | 0.34 [0.074-1.53]    | 0.237    | 0.599   |
| RBM12B   | 101         | 17        | 16.83%        | 196          | 54        | 27.55%        | 1.88 [1.13-3.13]     | 4.21E-02 | 0.507   |
| RBM12    | 101         | 4         | 3.96%         | 196          | 8         | 4.08%         | 1.03 [0.37-2.88]     | 0.960    | 1.000   |
| RBM14    | 101         | 6         | 5.94%         | 196          | 14        | 7.14%         | 1.22 [0.53-2.79]     | 0.696    | 0.951   |
| RBM34    | 101         | 7         | 6.93%         | 196          | 20        | 10.20%        | 1.53 [0.72-3.24]     | 0.355    | 0.722   |
| RBM38    | 101         | 9         | 8.91%         | 196          | 16        | 8.16%         | 0.91 [0.44-1.86]     | 0.826    | 1.000   |
| RBM39    | 101         | 4         | 3.96%         | 196          | 8         | 4.08%         | 1.03 [0.37-2.88]     | 0.960    | 1.000   |
| RBM4B    | 101         | 6         | 5.94%         | 196          | 13        | 6.63%         | 1.12 [0.49-2.60]     | 0.817    | 1.000   |
| RBM4     | 101         | 6         | 5.94%         | 196          | 14        | 7.14%         | 1.22 [0.53-2.79]     | 0.696    | 0.951   |
| RBM8A    | 101         | 5         | 4.95%         | 196          | 10        | 5.10%         | 1.03 [0.41-2.60]     | 0.955    | 1.000   |
| RBM1A1   | 101         | 0         | 0.00%         | 196          | 0         | 0.00%         | 1.00 [0e+00-Inf]     | 1.000    | 1.000   |
| RBM1A3P  | 101         | 0         | 0.00%         | 196          | 0         | 0.00%         | 1.00 [0e+00-Inf]     | 1.000    | 1.000   |
| RBM1B    | 101         | 0         | 0.00%         | 196          | 0         | 0.00%         | 1.00 [0e+00-Inf]     | 1.000    | 1.000   |
| RBM1E    | 101         | 0         | 0.00%         | 196          | 0         | 0.00%         | 1.00 [0e+00-Inf]     | 1.000    | 1.000   |
| RBM1F    | 101         | 0         | 0.00%         | 196          | 0         | 0.00%         | 1.00 [0e+00-Inf]     | 1.000    | 1.000   |
| RBM1J    | 101         | 0         | 0.00%         | 196          | 0         | 0.00%         | 1.00 [0e+00-Inf]     | 1.000    | 1.000   |
| RBM2EP   | 101         | 0         | 0.00%         | 196          | 0         | 0.00%         | 1.00 [0e+00-Inf]     | 1.000    | 1.000   |
| RBM2FP   | 101         | 0         | 0.00%         | 196          | 0         | 0.00%         | 1.00 [0e+00-Inf]     | 1.000    | 1.000   |
| RBM3AP   | 101         | 0         | 0.00%         | 196          | 0         | 0.00%         | 1.00 [0e+00-Inf]     | 1.000    | 1.000   |
| RBPJL    | 101         | 5         | 4.95%         | 196          | 3         | 1.53%         | 0.30 [0.088-1.01]    | 0.103    | 0.507   |
| RC3H1    | 101         | 5         | 4.95%         | 196          | 13        | 6.63%         | 1.36 [0.56-3.32]     | 0.566    | 0.852   |
| RCE1     | 101         | 8         | 7.92%         | 196          | 13        | 6.63%         | 0.83 [0.38-1.78]     | 0.682    | 0.943   |
| RCHY1    | 101         | 1         | 0.99%         | 196          | 5         | 2.55%         | 2.62 [0.43-16.05]    | 0.383    | 0.750   |



| Symbol   | CINSARC Low |           |               | CINSARC High |           |               | CINSARC High vs. Low |          |         |
|----------|-------------|-----------|---------------|--------------|-----------|---------------|----------------------|----------|---------|
|          | N tested    | N altered | Fq alteration | N tested     | N altered | Fq alteration | OR [95%CI]           | p-value* | q-value |
| RCOR3    | 101         | 7         | 6.93%         | 196          | 20        | 10.20%        | 1.53 [0.72-3.24]     | 0.355    | 0.722   |
| RCSD1    | 101         | 5         | 4.95%         | 196          | 12        | 6.12%         | 1.25 [0.51-3.08]     | 0.681    | 0.943   |
| RD3      | 101         | 7         | 6.93%         | 196          | 20        | 10.20%        | 1.53 [0.72-3.24]     | 0.355    | 0.722   |
| RDH10    | 101         | 16        | 15.84%        | 196          | 41        | 20.92%        | 1.41 [0.82-2.40]     | 0.294    | 0.650   |
| RDM1     | 101         | 2         | 1.98%         | 196          | 4         | 2.04%         | 1.03 [0.24-4.35]     | 0.972    | 1.000   |
| RECQL4   | 101         | 17        | 16.83%        | 196          | 49        | 25.00%        | 1.65 [0.98-2.76]     | 0.111    | 0.511   |
| RECQL5   | 101         | 5         | 4.95%         | 196          | 12        | 6.12%         | 1.25 [0.51-3.08]     | 0.681    | 0.943   |
| RELT     | 101         | 7         | 6.93%         | 196          | 12        | 6.12%         | 0.88 [0.39-1.97]     | 0.788    | 0.996   |
| REN      | 101         | 7         | 6.93%         | 196          | 28        | 14.29%        | 2.24 [1.08-4.63]     | 0.068    | 0.507   |
| RFFL     | 101         | 1         | 0.99%         | 196          | 5         | 2.55%         | 2.62 [0.43-16.05]    | 0.383    | 0.750   |
| RFNG     | 101         | 2         | 1.98%         | 196          | 14        | 7.14%         | 3.81 [1.08-13.43]    | 0.081    | 0.507   |
| RFPL4A   | 101         | 2         | 1.98%         | 196          | 5         | 2.55%         | 1.30 [0.32-5.21]     | 0.759    | 0.996   |
| RFX5     | 101         | 6         | 5.94%         | 196          | 13        | 6.63%         | 1.12 [0.49-2.60]     | 0.817    | 1.000   |
| RGL1     | 101         | 5         | 4.95%         | 196          | 20        | 10.20%        | 2.18 [0.93-5.10]     | 0.130    | 0.535   |
| RGMA     | 101         | 0         | 0.00%         | 196          | 6         | 3.06%         | 2.7e+07 [0e+00-Inf]  | 0.992    | 1.000   |
| RGS11    | 101         | 7         | 6.93%         | 196          | 4         | 2.04%         | 0.28 [0.098-0.80]    | 4.63E-02 | 0.507   |
| RGS13    | 101         | 5         | 4.95%         | 196          | 19        | 9.69%         | 2.06 [0.88-4.83]     | 0.163    | 0.535   |
| RGS16    | 101         | 5         | 4.95%         | 196          | 19        | 9.69%         | 2.06 [0.88-4.83]     | 0.163    | 0.535   |
| RGS18    | 101         | 5         | 4.95%         | 196          | 19        | 9.69%         | 2.06 [0.88-4.83]     | 0.163    | 0.535   |
| RGS19    | 101         | 7         | 6.93%         | 196          | 11        | 5.61%         | 0.80 [0.35-1.82]     | 0.652    | 0.928   |
| RGS1     | 101         | 5         | 4.95%         | 196          | 19        | 9.69%         | 2.06 [0.88-4.83]     | 0.163    | 0.535   |
| RGS20    | 101         | 12        | 11.88%        | 196          | 30        | 15.31%        | 1.34 [0.73-2.45]     | 0.423    | 0.787   |
| RGS21    | 101         | 5         | 4.95%         | 196          | 19        | 9.69%         | 2.06 [0.88-4.83]     | 0.163    | 0.535   |
| RGS22    | 101         | 15        | 14.85%        | 196          | 57        | 29.08%        | 2.35 [1.39-3.99]     | 7.74E-03 | 0.507   |
| RGS2     | 101         | 5         | 4.95%         | 196          | 18        | 9.18%         | 1.94 [0.82-4.58]     | 0.203    | 0.570   |
| RGS4     | 101         | 5         | 4.95%         | 196          | 13        | 6.63%         | 1.36 [0.56-3.32]     | 0.566    | 0.852   |
| RGS5     | 101         | 5         | 4.95%         | 196          | 13        | 6.63%         | 1.36 [0.56-3.32]     | 0.566    | 0.852   |
| RGS7     | 101         | 4         | 3.96%         | 196          | 19        | 9.69%         | 2.60 [1.03-6.59]     | 0.090    | 0.507   |
| RGS8     | 101         | 5         | 4.95%         | 196          | 19        | 9.69%         | 2.06 [0.88-4.83]     | 0.163    | 0.535   |
| RGS9     | 101         | 9         | 8.91%         | 196          | 24        | 12.24%        | 1.43 [0.72-2.81]     | 0.388    | 0.757   |
| RGSL1    | 101         | 5         | 4.95%         | 196          | 19        | 9.69%         | 2.06 [0.88-4.83]     | 0.163    | 0.535   |
| RHBDF1   | 101         | 7         | 6.93%         | 196          | 4         | 2.04%         | 0.28 [0.098-0.80]    | 4.63E-02 | 0.507   |
| RHBDF2   | 101         | 3         | 2.97%         | 196          | 15        | 7.65%         | 2.71 [0.94-7.82]     | 0.122    | 0.534   |
| RHBDL1   | 101         | 6         | 5.94%         | 196          | 4         | 2.04%         | 0.33 [0.11-0.97]     | 0.092    | 0.507   |
| RHBG     | 101         | 5         | 4.95%         | 196          | 9         | 4.59%         | 0.92 [0.36-2.37]     | 0.890    | 1.000   |
| RHCG     | 101         | 1         | 0.99%         | 196          | 6         | 3.06%         | 3.16 [0.53-18.88]    | 0.290    | 0.650   |
| RHOD     | 101         | 8         | 7.92%         | 196          | 12        | 6.12%         | 0.76 [0.35-1.65]     | 0.559    | 0.852   |
| RHOT2    | 101         | 6         | 5.94%         | 196          | 4         | 2.04%         | 0.33 [0.11-0.97]     | 0.092    | 0.507   |
| RHOU     | 101         | 6         | 5.94%         | 196          | 19        | 9.69%         | 1.70 [0.77-3.78]     | 0.274    | 0.643   |
| RHPN1    | 101         | 17        | 16.83%        | 196          | 51        | 26.02%        | 1.74 [1.04-2.90]     | 0.076    | 0.507   |
| RIMS2    | 101         | 17        | 16.83%        | 196          | 53        | 27.04%        | 1.83 [1.10-3.05]     | 0.052    | 0.507   |
| RIMS4    | 101         | 4         | 3.96%         | 196          | 4         | 2.04%         | 0.51 [0.16-1.65]     | 0.342    | 0.716   |
| RIN1     | 101         | 4         | 3.96%         | 196          | 6         | 3.06%         | 0.77 [0.26-2.26]     | 0.685    | 0.943   |
| RIPK2    | 101         | 18        | 17.82%        | 196          | 49        | 25.00%        | 1.54 [0.93-2.55]     | 0.163    | 0.535   |
| RIT1     | 101         | 7         | 6.93%         | 196          | 9         | 4.59%         | 0.65 [0.27-1.52]     | 0.401    | 0.774   |
| RLBP1    | 101         | 1         | 0.99%         | 196          | 6         | 3.06%         | 3.16 [0.53-18.88]    | 0.290    | 0.650   |
| RNASEL   | 101         | 5         | 4.95%         | 196          | 19        | 9.69%         | 2.06 [0.88-4.83]     | 0.163    | 0.535   |
| RNF112   | 101         | 4         | 3.96%         | 196          | 1         | 0.51%         | 0.12 [0.02-0.79]     | 0.064    | 0.507   |
| RNF114   | 101         | 8         | 7.92%         | 196          | 14        | 7.14%         | 0.89 [0.42-1.91]     | 0.808    | 1.000   |
| RNF115   | 101         | 5         | 4.95%         | 196          | 10        | 5.10%         | 1.03 [0.41-2.60]     | 0.955    | 1.000   |
| RNF121   | 101         | 5         | 4.95%         | 196          | 6         | 3.06%         | 0.61 [0.22-1.68]     | 0.418    | 0.779   |
| RNF122   | 101         | 4         | 3.96%         | 196          | 11        | 5.61%         | 1.44 [0.54-3.85]     | 0.540    | 0.837   |
| RNF126P1 | 101         | 7         | 6.93%         | 196          | 23        | 11.73%        | 1.79 [0.85-3.74]     | 0.198    | 0.570   |
| RNF135   | 101         | 2         | 1.98%         | 196          | 3         | 1.53%         | 0.77 [0.17-3.50]     | 0.776    | 0.996   |
| RNF139   | 101         | 16        | 15.84%        | 196          | 57        | 29.08%        | 2.18 [1.30-3.66]     | 1.33E-02 | 0.507   |
| RNF151   | 101         | 6         | 5.94%         | 196          | 5         | 2.55%         | 0.41 [0.15-1.15]     | 0.154    | 0.535   |
| RNF157   | 101         | 2         | 1.98%         | 196          | 13        | 6.63%         | 3.52 [0.99-12.47]    | 0.102    | 0.507   |
| RNF168   | 101         | 4         | 3.96%         | 196          | 4         | 2.04%         | 0.51 [0.16-1.65]     | 0.342    | 0.716   |
| RNF169   | 101         | 5         | 4.95%         | 196          | 14        | 7.14%         | 1.48 [0.61-3.57]     | 0.467    | 0.805   |
| RNF170   | 101         | 13        | 12.87%        | 196          | 26        | 13.27%        | 1.04 [0.57-1.88]     | 0.924    | 1.000   |
| RNF187   | 101         | 7         | 6.93%         | 196          | 21        | 10.71%        | 1.61 [0.76-3.40]     | 0.294    | 0.650   |
| RNF19A   | 101         | 15        | 14.85%        | 196          | 55        | 28.06%        | 2.24 [1.32-3.80]     | 1.24E-02 | 0.507   |
| RNF213   | 101         | 5         | 4.95%         | 196          | 13        | 6.63%         | 1.36 [0.56-3.32]     | 0.566    | 0.852   |
| RNF2     | 101         | 5         | 4.95%         | 196          | 18        | 9.18%         | 1.94 [0.82-4.58]     | 0.203    | 0.570   |
| RNF40    | 101         | 4         | 3.96%         | 196          | 5         | 2.55%         | 0.63 [0.21-1.95]     | 0.505    | 0.805   |
| RNF43    | 101         | 7         | 6.93%         | 196          | 29        | 14.80%        | 2.33 [1.13-4.81]     | 0.055    | 0.507   |
| RNFT1    | 101         | 7         | 6.93%         | 196          | 34        | 17.35%        | 2.82 [1.38-5.76]     | 1.72E-02 | 0.507   |
| RNPEP    | 101         | 8         | 7.92%         | 196          | 24        | 12.24%        | 1.62 [0.80-3.28]     | 0.258    | 0.635   |
| RNPS1    | 101         | 6         | 5.94%         | 196          | 5         | 2.55%         | 0.41 [0.15-1.15]     | 0.154    | 0.535   |
| LAMTOR2  | 101         | 6         | 5.94%         | 196          | 9         | 4.59%         | 0.76 [0.31-1.86]     | 0.616    | 0.898   |
| ROGDI    | 101         | 5         | 4.95%         | 196          | 5         | 2.55%         | 0.50 [0.17-1.45]     | 0.286    | 0.650   |

| Symbol   | CINSARC Low |           |               | CINSARC High |           |               | CINSARC High vs. Low |          |         |
|----------|-------------|-----------|---------------|--------------|-----------|---------------|----------------------|----------|---------|
|          | N tested    | N altered | Fq alteration | N tested     | N altered | Fq alteration | OR [95%CI]           | p-value* | q-value |
| ROMO1    | 101         | 4         | 3.96%         | 196          | 8         | 4.08%         | 1.03 [0.37-2.88]     | 0.960    | 1.000   |
| RORC     | 101         | 6         | 5.94%         | 196          | 12        | 6.12%         | 1.03 [0.44-2.41]     | 0.950    | 1.000   |
| RP1L1    | 101         | 2         | 1.98%         | 196          | 3         | 1.53%         | 0.77 [0.17-3.50]     | 0.776    | 0.996   |
| RP1      | 101         | 13        | 12.87%        | 196          | 29        | 14.80%        | 1.18 [0.65-2.12]     | 0.652    | 0.928   |
| RP9P     | 101         | 0         | 0.00%         | 196          | 8         | 4.08%         | 3.6e+07 [0e+00-Inf]  | 0.992    | 1.000   |
| RP9      | 101         | 0         | 0.00%         | 196          | 8         | 4.08%         | 3.6e+07 [0e+00-Inf]  | 0.992    | 1.000   |
| RPL19    | 101         | 4         | 3.96%         | 196          | 12        | 6.12%         | 1.58 [0.60-4.18]     | 0.438    | 0.798   |
| RPL23A   | 101         | 3         | 2.97%         | 196          | 8         | 4.08%         | 1.39 [0.45-4.31]     | 0.632    | 0.909   |
| RPL23P8  | 101         | 0         | 0.00%         | 196          | 6         | 3.06%         | 2.7e+07 [0e+00-Inf]  | 0.992    | 1.000   |
| RPL23    | 101         | 4         | 3.96%         | 196          | 9         | 4.59%         | 1.17 [0.43-3.20]     | 0.801    | 1.000   |
| RPL28    | 101         | 1         | 0.99%         | 196          | 4         | 2.04%         | 2.08 [0.33-13.25]    | 0.514    | 0.805   |
| RPL30    | 101         | 16        | 15.84%        | 196          | 54        | 27.55%        | 2.02 [1.20-3.40]     | 2.60E-02 | 0.507   |
| RPL31P11 | 101         | 6         | 5.94%         | 196          | 16        | 8.16%         | 1.41 [0.62-3.18]     | 0.490    | 0.805   |
| RPL35A   | 101         | 3         | 2.97%         | 196          | 4         | 2.04%         | 0.68 [0.19-2.43]     | 0.619    | 0.898   |
| RPL38    | 101         | 6         | 5.94%         | 196          | 15        | 7.65%         | 1.31 [0.58-2.98]     | 0.586    | 0.869   |
| RPL3L    | 101         | 6         | 5.94%         | 196          | 5         | 2.55%         | 0.41 [0.15-1.15]     | 0.154    | 0.535   |
| RPL7     | 101         | 16        | 15.84%        | 196          | 41        | 20.92%        | 1.41 [0.82-2.40]     | 0.294    | 0.650   |
| RPL8     | 101         | 17        | 16.83%        | 196          | 49        | 25.00%        | 1.65 [0.98-2.76]     | 0.111    | 0.511   |
| RPLPOP2  | 101         | 0         | 0.00%         | 196          | 5         | 2.55%         | 2.2e+07 [0e+00-Inf]  | 0.992    | 1.000   |
| RPN2     | 101         | 5         | 4.95%         | 196          | 3         | 1.53%         | 0.30 [0.088-1.01]    | 0.103    | 0.507   |
| RPRD1B   | 101         | 5         | 4.95%         | 196          | 3         | 1.53%         | 0.30 [0.088-1.01]    | 0.103    | 0.507   |
| RPRD2    | 101         | 8         | 7.92%         | 196          | 15        | 7.65%         | 0.96 [0.46-2.04]     | 0.935    | 1.000   |
| RPRML    | 101         | 1         | 0.99%         | 196          | 5         | 2.55%         | 2.62 [0.43-16.05]    | 0.383    | 0.750   |
| RPS10P7  | 101         | 7         | 6.93%         | 196          | 23        | 11.73%        | 1.79 [0.85-3.74]     | 0.198    | 0.570   |
| RPS15A   | 101         | 6         | 5.94%         | 196          | 4         | 2.04%         | 0.33 [0.11-0.97]     | 0.092    | 0.507   |
| RPS17    | 101         | 1         | 0.99%         | 196          | 4         | 2.04%         | 2.08 [0.33-13.25]    | 0.514    | 0.805   |
| RPS20    | 101         | 14        | 13.86%        | 196          | 31        | 15.82%        | 1.17 [0.66-2.07]     | 0.656    | 0.931   |
| RPS21    | 101         | 6         | 5.94%         | 196          | 11        | 5.61%         | 0.94 [0.40-2.23]     | 0.908    | 1.000   |
| RPS27    | 101         | 7         | 6.93%         | 196          | 13        | 6.63%         | 0.95 [0.43-2.12]     | 0.923    | 1.000   |
| RPS2P32  | 101         | 0         | 0.00%         | 196          | 6         | 3.06%         | 2.7e+07 [0e+00-Inf]  | 0.992    | 1.000   |
| RPS2     | 101         | 6         | 5.94%         | 196          | 5         | 2.55%         | 0.41 [0.15-1.15]     | 0.154    | 0.535   |
| RPS3     | 101         | 5         | 4.95%         | 196          | 16        | 8.16%         | 1.71 [0.72-4.07]     | 0.311    | 0.680   |
| RPS4Y1   | 101         | 0         | 0.00%         | 196          | 0         | 0.00%         | 1.00 [0e+00-Inf]     | 1.000    | 1.000   |
| RPS4Y2   | 101         | 0         | 0.00%         | 196          | 0         | 0.00%         | 1.00 [0e+00-Inf]     | 1.000    | 1.000   |
| RPS6KB1  | 101         | 7         | 6.93%         | 196          | 34        | 17.35%        | 2.82 [1.38-5.76]     | 1.72E-02 | 0.507   |
| RPS6KB2  | 101         | 11        | 10.89%        | 196          | 20        | 10.20%        | 0.93 [0.48-1.79]     | 0.854    | 1.000   |
| RPS6KC1  | 101         | 6         | 5.94%         | 196          | 22        | 11.22%        | 2.00 [0.91-4.39]     | 0.146    | 0.535   |
| RPSAP52  | 101         | 1         | 0.99%         | 196          | 6         | 3.06%         | 3.16 [0.53-18.88]    | 0.290    | 0.650   |
| RPTN     | 101         | 7         | 6.93%         | 196          | 13        | 6.63%         | 0.95 [0.43-2.12]     | 0.923    | 1.000   |
| RPTOR    | 101         | 3         | 2.97%         | 196          | 12        | 6.12%         | 2.13 [0.72-6.28]     | 0.250    | 0.623   |
| RPUSD1   | 101         | 6         | 5.94%         | 196          | 4         | 2.04%         | 0.33 [0.11-0.97]     | 0.092    | 0.507   |
| RRM2B    | 101         | 16        | 15.84%        | 196          | 55        | 28.06%        | 2.07 [1.23-3.48]     | 2.09E-02 | 0.507   |
| RRN3P1   | 101         | 6         | 5.94%         | 196          | 2         | 1.02%         | 0.16 [0.042-0.64]    | 2.82E-02 | 0.507   |
| RRN3P2   | 101         | 5         | 4.95%         | 196          | 3         | 1.53%         | 0.30 [0.088-1.01]    | 0.103    | 0.507   |
| RRN3P3   | 101         | 5         | 4.95%         | 196          | 3         | 1.53%         | 0.30 [0.088-1.01]    | 0.103    | 0.507   |
| RRN3     | 101         | 7         | 6.93%         | 196          | 3         | 1.53%         | 0.21 [0.066-0.66]    | 2.55E-02 | 0.507   |
| RRP15    | 101         | 6         | 5.94%         | 196          | 19        | 9.69%         | 1.70 [0.77-3.78]     | 0.274    | 0.643   |
| RRS1     | 101         | 15        | 14.85%        | 196          | 38        | 19.39%        | 1.38 [0.80-2.38]     | 0.335    | 0.716   |
| RSAD1    | 101         | 4         | 3.96%         | 196          | 20        | 10.20%        | 2.76 [1.09-6.95]     | 0.071    | 0.507   |
| RSF1     | 101         | 10        | 9.90%         | 196          | 21        | 10.71%        | 1.09 [0.56-2.13]     | 0.828    | 1.000   |
| RSL1D1   | 101         | 5         | 4.95%         | 196          | 3         | 1.53%         | 0.30 [0.088-1.01]    | 0.103    | 0.507   |
| RSPO2    | 101         | 16        | 15.84%        | 196          | 50        | 25.51%        | 1.82 [1.08-3.07]     | 0.060    | 0.507   |
| RTEL1    | 101         | 7         | 6.93%         | 196          | 16        | 8.16%         | 1.19 [0.55-2.59]     | 0.707    | 0.962   |
| RTN4IP1  | 101         | 1         | 0.99%         | 196          | 7         | 3.57%         | 3.70 [0.63-21.75]    | 0.224    | 0.596   |
| SNX29    | 101         | 5         | 4.95%         | 196          | 3         | 1.53%         | 0.30 [0.088-1.01]    | 0.103    | 0.507   |
| SNX29P2  | 101         | 4         | 3.96%         | 196          | 4         | 2.04%         | 0.51 [0.16-1.65]     | 0.342    | 0.716   |
| RUNX1T1  | 101         | 17        | 16.83%        | 196          | 48        | 24.49%        | 1.60 [0.96-2.68]     | 0.133    | 0.535   |
| RUSC1    | 101         | 7         | 6.93%         | 196          | 14        | 7.14%         | 1.03 [0.47-2.28]     | 0.946    | 1.000   |
| RXFP4    | 101         | 7         | 6.93%         | 196          | 9         | 4.59%         | 0.65 [0.27-1.52]     | 0.401    | 0.774   |
| RXRG     | 101         | 4         | 3.96%         | 196          | 12        | 6.12%         | 1.58 [0.60-4.18]     | 0.438    | 0.798   |
| RYR2     | 101         | 5         | 4.95%         | 196          | 19        | 9.69%         | 2.06 [0.88-4.83]     | 0.163    | 0.535   |
| S100A10  | 101         | 6         | 5.94%         | 196          | 13        | 6.63%         | 1.12 [0.49-2.60]     | 0.817    | 1.000   |
| S100A11  | 101         | 7         | 6.93%         | 196          | 13        | 6.63%         | 0.95 [0.43-2.12]     | 0.923    | 1.000   |
| S100A12  | 101         | 8         | 7.92%         | 196          | 13        | 6.63%         | 0.83 [0.38-1.78]     | 0.682    | 0.943   |
| S100A13  | 101         | 7         | 6.93%         | 196          | 12        | 6.12%         | 0.88 [0.39-1.97]     | 0.788    | 0.996   |
| S100A14  | 101         | 7         | 6.93%         | 196          | 13        | 6.63%         | 0.95 [0.43-2.12]     | 0.923    | 1.000   |
| S100A16  | 101         | 7         | 6.93%         | 196          | 13        | 6.63%         | 0.95 [0.43-2.12]     | 0.923    | 1.000   |
| S100A1   | 101         | 7         | 6.93%         | 196          | 12        | 6.12%         | 0.88 [0.39-1.97]     | 0.788    | 0.996   |
| S100A2   | 101         | 7         | 6.93%         | 196          | 12        | 6.12%         | 0.88 [0.39-1.97]     | 0.788    | 0.996   |
| S100A3   | 101         | 8         | 7.92%         | 196          | 12        | 6.12%         | 0.76 [0.35-1.65]     | 0.559    | 0.852   |
| S100A4   | 101         | 8         | 7.92%         | 196          | 12        | 6.12%         | 0.76 [0.35-1.65]     | 0.559    | 0.852   |

| Symbol   | CINSARC Low |           |               | CINSARC High |           |               | CINSARC High vs. Low |          |         |
|----------|-------------|-----------|---------------|--------------|-----------|---------------|----------------------|----------|---------|
|          | N tested    | N altered | Fq alteration | N tested     | N altered | Fq alteration | OR [95%CI]           | p-value* | q-value |
| S100A5   | 101         | 8         | 7.92%         | 196          | 12        | 6.12%         | 0.76 [0.35-1.65]     | 0.559    | 0.852   |
| S100A6   | 101         | 8         | 7.92%         | 196          | 12        | 6.12%         | 0.76 [0.35-1.65]     | 0.559    | 0.852   |
| S100A7A  | 101         | 7         | 6.93%         | 196          | 12        | 6.12%         | 0.88 [0.39-1.97]     | 0.788    | 0.996   |
| S100A7L2 | 101         | 7         | 6.93%         | 196          | 12        | 6.12%         | 0.88 [0.39-1.97]     | 0.788    | 0.996   |
| S100A7   | 101         | 7         | 6.93%         | 196          | 12        | 6.12%         | 0.88 [0.39-1.97]     | 0.788    | 0.996   |
| S100A8   | 101         | 7         | 6.93%         | 196          | 12        | 6.12%         | 0.88 [0.39-1.97]     | 0.788    | 0.996   |
| S100A9   | 101         | 7         | 6.93%         | 196          | 12        | 6.12%         | 0.88 [0.39-1.97]     | 0.788    | 0.996   |
| SALL4    | 101         | 6         | 5.94%         | 196          | 18        | 9.18%         | 1.60 [0.72-3.57]     | 0.335    | 0.716   |
| SAMD10   | 101         | 6         | 5.94%         | 196          | 11        | 5.61%         | 0.94 [0.40-2.23]     | 0.908    | 1.000   |
| SAMD12   | 101         | 15        | 14.85%        | 196          | 56        | 28.57%        | 2.29 [1.35-3.89]     | 9.81E-03 | 0.507   |
| SAMD14   | 101         | 5         | 4.95%         | 196          | 17        | 8.67%         | 1.82 [0.77-4.32]     | 0.252    | 0.623   |
| SAMD8    | 101         | 2         | 1.98%         | 196          | 6         | 3.06%         | 1.56 [0.40-6.08]     | 0.589    | 0.869   |
| SAMHD1   | 101         | 3         | 2.97%         | 196          | 5         | 2.55%         | 0.86 [0.25-2.89]     | 0.833    | 1.000   |
| SAP30BP  | 101         | 5         | 4.95%         | 196          | 12        | 6.12%         | 1.25 [0.51-3.08]     | 0.681    | 0.943   |
| PPP6R3   | 101         | 7         | 6.93%         | 196          | 23        | 11.73%        | 1.79 [0.85-3.74]     | 0.198    | 0.570   |
| SARM1    | 101         | 3         | 2.97%         | 196          | 7         | 3.57%         | 1.21 [0.38-3.83]     | 0.786    | 0.996   |
| SBF1P1   | 101         | 14        | 13.86%        | 196          | 30        | 15.31%        | 1.12 [0.63-2.00]     | 0.740    | 0.996   |
| SBK1     | 101         | 5         | 4.95%         | 196          | 3         | 1.53%         | 0.30 [0.088-1.01]    | 0.103    | 0.507   |
| SBK2     | 101         | 2         | 1.98%         | 196          | 4         | 2.04%         | 1.03 [0.24-4.35]     | 0.972    | 1.000   |
| SCAMP3   | 101         | 7         | 6.93%         | 196          | 14        | 7.14%         | 1.03 [0.47-2.28]     | 0.946    | 1.000   |
| SCAND1   | 101         | 4         | 3.96%         | 196          | 8         | 4.08%         | 1.03 [0.37-2.88]     | 0.960    | 1.000   |
| SCAND2P  | 101         | 1         | 0.99%         | 196          | 5         | 2.55%         | 2.62 [0.43-16.05]    | 0.383    | 0.750   |
| SCARB2   | 101         | 1         | 0.99%         | 196          | 5         | 2.55%         | 2.62 [0.43-16.05]    | 0.383    | 0.750   |
| SCARNA15 | 101         | 1         | 0.99%         | 196          | 4         | 2.04%         | 2.08 [0.33-13.25]    | 0.514    | 0.805   |
| SCARNA16 | 101         | 2         | 1.98%         | 196          | 14        | 7.14%         | 3.81 [1.08-13.43]    | 0.081    | 0.507   |
| SCARNA20 | 101         | 7         | 6.93%         | 196          | 33        | 16.84%        | 2.72 [1.33-5.57]     | 2.17E-02 | 0.507   |
| SCARNA3  | 101         | 5         | 4.95%         | 196          | 14        | 7.14%         | 1.48 [0.61-3.57]     | 0.467    | 0.805   |
| SCARNA4  | 101         | 7         | 6.93%         | 196          | 9         | 4.59%         | 0.65 [0.27-1.52]     | 0.401    | 0.774   |
| SCCPDH   | 101         | 5         | 4.95%         | 196          | 18        | 9.18%         | 1.94 [0.82-4.58]     | 0.203    | 0.570   |
| SCFD1    | 101         | 1         | 0.99%         | 196          | 8         | 4.08%         | 4.26 [0.73-24.65]    | 0.175    | 0.535   |
| SCML4    | 101         | 1         | 0.99%         | 196          | 5         | 2.55%         | 2.62 [0.43-16.05]    | 0.383    | 0.750   |
| SCN4A    | 101         | 8         | 7.92%         | 196          | 29        | 14.80%        | 2.02 [1.01-4.03]     | 0.094    | 0.507   |
| SCNM1    | 101         | 7         | 6.93%         | 196          | 13        | 6.63%         | 0.95 [0.43-2.12]     | 0.923    | 1.000   |
| SCNN1B   | 101         | 5         | 4.95%         | 196          | 2         | 1.02%         | 0.20 [0.049-0.80]    | 0.056    | 0.507   |
| SCNN1G   | 101         | 5         | 4.95%         | 196          | 1         | 0.51%         | 0.098 [0.016-0.60]   | 3.55E-02 | 0.507   |
| SCPEP1   | 101         | 7         | 6.93%         | 196          | 22        | 11.22%        | 1.70 [0.81-3.57]     | 0.242    | 0.610   |
| SCRIB    | 101         | 16        | 15.84%        | 196          | 51        | 26.02%        | 1.87 [1.11-3.15]     | 4.89E-02 | 0.507   |
| SCRN1    | 101         | 0         | 0.00%         | 196          | 6         | 3.06%         | 2.7e+07 [0e+00-Inf]  | 0.992    | 1.000   |
| SCRN2    | 101         | 1         | 0.99%         | 196          | 10        | 5.10%         | 5.38 [0.95-30.54]    | 0.111    | 0.511   |
| SCRT1    | 101         | 18        | 17.82%        | 196          | 50        | 25.51%        | 1.58 [0.95-2.62]     | 0.137    | 0.535   |
| SCYL3    | 101         | 4         | 3.96%         | 196          | 12        | 6.12%         | 1.58 [0.60-4.18]     | 0.438    | 0.798   |
| SDAD1    | 101         | 1         | 0.99%         | 196          | 5         | 2.55%         | 2.62 [0.43-16.05]    | 0.383    | 0.750   |
| SDC2     | 101         | 15        | 14.85%        | 196          | 53        | 27.04%        | 2.12 [1.25-3.61]     | 1.95E-02 | 0.507   |
| SDC4     | 101         | 5         | 4.95%         | 196          | 3         | 1.53%         | 0.30 [0.088-1.01]    | 0.103    | 0.507   |
| SDCBP    | 101         | 14        | 13.86%        | 196          | 33        | 16.84%        | 1.26 [0.71-2.22]     | 0.506    | 0.805   |
| SDCCAG8  | 101         | 5         | 4.95%         | 196          | 19        | 9.69%         | 2.06 [0.88-4.83]     | 0.163    | 0.535   |
| SDF2     | 101         | 3         | 2.97%         | 196          | 8         | 4.08%         | 1.39 [0.45-4.31]     | 0.632    | 0.909   |
| SDHAF2   | 101         | 1         | 0.99%         | 196          | 5         | 2.55%         | 2.62 [0.43-16.05]    | 0.383    | 0.750   |
| SDHAP1   | 101         | 6         | 5.94%         | 196          | 3         | 1.53%         | 0.25 [0.076-0.80]    | 0.051    | 0.507   |
| SDHAP2   | 101         | 5         | 4.95%         | 196          | 7         | 3.57%         | 0.71 [0.27-1.90]     | 0.569    | 0.855   |
| SDHC     | 101         | 6         | 5.94%         | 196          | 16        | 8.16%         | 1.41 [0.62-3.18]     | 0.490    | 0.805   |
| SDK2     | 101         | 5         | 4.95%         | 196          | 14        | 7.14%         | 1.48 [0.61-3.57]     | 0.467    | 0.805   |
| SDR16C5  | 101         | 14        | 13.86%        | 196          | 30        | 15.31%        | 1.12 [0.63-2.00]     | 0.740    | 0.996   |
| SEBOX    | 101         | 3         | 2.97%         | 196          | 7         | 3.57%         | 1.21 [0.38-3.83]     | 0.786    | 0.996   |
| SEC11A   | 101         | 1         | 0.99%         | 196          | 5         | 2.55%         | 2.62 [0.43-16.05]    | 0.383    | 0.750   |
| SEC11C   | 101         | 1         | 0.99%         | 196          | 4         | 2.04%         | 2.08 [0.33-13.25]    | 0.514    | 0.805   |
| SEC14L1  | 101         | 2         | 1.98%         | 196          | 14        | 7.14%         | 3.81 [1.08-13.43]    | 0.081    | 0.507   |
| SEC14L5  | 101         | 5         | 4.95%         | 196          | 5         | 2.55%         | 0.50 [0.17-1.45]     | 0.286    | 0.650   |
| SEC16B   | 101         | 5         | 4.95%         | 196          | 16        | 8.16%         | 1.71 [0.72-4.07]     | 0.311    | 0.680   |
| SEC22B   | 101         | 2         | 1.98%         | 196          | 4         | 2.04%         | 1.03 [0.24-4.35]     | 0.972    | 1.000   |
| SEC24C   | 101         | 0         | 0.00%         | 196          | 5         | 2.55%         | 2.2e+07 [0e+00-Inf]  | 0.992    | 1.000   |
| SEC63    | 101         | 1         | 0.99%         | 196          | 4         | 2.04%         | 2.08 [0.33-13.25]    | 0.514    | 0.805   |
| SECTM1   | 101         | 2         | 1.98%         | 196          | 14        | 7.14%         | 3.81 [1.08-13.43]    | 0.081    | 0.507   |
| SELENBP1 | 101         | 6         | 5.94%         | 196          | 13        | 6.63%         | 1.12 [0.49-2.60]     | 0.817    | 1.000   |
| SELE     | 101         | 4         | 3.96%         | 196          | 13        | 6.63%         | 1.72 [0.66-4.51]     | 0.353    | 0.722   |
| SELL     | 101         | 4         | 3.96%         | 196          | 13        | 6.63%         | 1.72 [0.66-4.51]     | 0.353    | 0.722   |
| SELP     | 101         | 4         | 3.96%         | 196          | 13        | 6.63%         | 1.72 [0.66-4.51]     | 0.353    | 0.722   |
| SEMA4A   | 101         | 6         | 5.94%         | 196          | 9         | 4.59%         | 0.76 [0.31-1.86]     | 0.616    | 0.898   |
| SEMA4B   | 101         | 2         | 1.98%         | 196          | 8         | 4.08%         | 2.11 [0.56-7.86]     | 0.352    | 0.722   |
| SEMA6C   | 101         | 7         | 6.93%         | 196          | 13        | 6.63%         | 0.95 [0.43-2.12]     | 0.923    | 1.000   |
| SEMG1    | 101         | 5         | 4.95%         | 196          | 3         | 1.53%         | 0.30 [0.088-1.01]    | 0.103    | 0.507   |

| Symbol    | CINSARC Low |           |               | CINSARC High |           |               | CINSARC High vs. Low |          |         |
|-----------|-------------|-----------|---------------|--------------|-----------|---------------|----------------------|----------|---------|
|           | N tested    | N altered | Fq alteration | N tested     | N altered | Fq alteration | OR [95%CI]           | p-value* | q-value |
| SEMG2     | 101         | 5         | 4.95%         | 196          | 3         | 1.53%         | 0.30 [0.088-1.01]    | 0.103    | 0.507   |
| SENP2     | 101         | 3         | 2.97%         | 196          | 2         | 1.02%         | 0.34 [0.074-1.53]    | 0.237    | 0.599   |
| SENP5     | 101         | 4         | 3.96%         | 196          | 4         | 2.04%         | 0.51 [0.16-1.65]     | 0.342    | 0.716   |
| SEPHS2    | 101         | 4         | 3.96%         | 196          | 5         | 2.55%         | 0.63 [0.21-1.95]     | 0.505    | 0.805   |
| sept-12   | 101         | 5         | 4.95%         | 196          | 5         | 2.55%         | 0.50 [0.17-1.45]     | 0.286    | 0.650   |
| sept-01   | 101         | 4         | 3.96%         | 196          | 5         | 2.55%         | 0.63 [0.21-1.95]     | 0.505    | 0.805   |
| sept-09   | 101         | 3         | 2.97%         | 196          | 13        | 6.63%         | 2.32 [0.79-6.79]     | 0.197    | 0.570   |
| MSRB1     | 101         | 6         | 5.94%         | 196          | 5         | 2.55%         | 0.41 [0.15-1.15]     | 0.154    | 0.535   |
| SERINC3   | 101         | 3         | 2.97%         | 196          | 4         | 2.04%         | 0.68 [0.19-2.43]     | 0.619    | 0.898   |
| SERPINB10 | 101         | 3         | 2.97%         | 196          | 3         | 1.53%         | 0.51 [0.13-1.98]     | 0.412    | 0.774   |
| SERPINB11 | 101         | 3         | 2.97%         | 196          | 3         | 1.53%         | 0.51 [0.13-1.98]     | 0.412    | 0.774   |
| SERPINB12 | 101         | 4         | 3.96%         | 196          | 2         | 1.02%         | 0.25 [0.059-1.05]    | 0.113    | 0.511   |
| SERPINB13 | 101         | 4         | 3.96%         | 196          | 2         | 1.02%         | 0.25 [0.059-1.05]    | 0.113    | 0.511   |
| SERPINB2  | 101         | 4         | 3.96%         | 196          | 3         | 1.53%         | 0.38 [0.11-1.35]     | 0.207    | 0.573   |
| SERPINB3  | 101         | 3         | 2.97%         | 196          | 3         | 1.53%         | 0.51 [0.13-1.98]     | 0.412    | 0.774   |
| SERPINB4  | 101         | 3         | 2.97%         | 196          | 2         | 1.02%         | 0.34 [0.074-1.53]    | 0.237    | 0.599   |
| SERPINB5  | 101         | 3         | 2.97%         | 196          | 2         | 1.02%         | 0.34 [0.074-1.53]    | 0.237    | 0.599   |
| SERPINB7  | 101         | 3         | 2.97%         | 196          | 3         | 1.53%         | 0.51 [0.13-1.98]     | 0.412    | 0.774   |
| SERPINB8  | 101         | 3         | 2.97%         | 196          | 3         | 1.53%         | 0.51 [0.13-1.98]     | 0.412    | 0.774   |
| SERPINC1  | 101         | 5         | 4.95%         | 196          | 13        | 6.63%         | 1.36 [0.56-3.32]     | 0.566    | 0.852   |
| SERPINH1  | 101         | 4         | 3.96%         | 196          | 19        | 9.69%         | 2.60 [1.03-6.59]     | 0.090    | 0.507   |
| SERTAD4   | 101         | 6         | 5.94%         | 196          | 21        | 10.71%        | 1.90 [0.86-4.19]     | 0.181    | 0.535   |
| SESN1     | 101         | 1         | 0.99%         | 196          | 4         | 2.04%         | 2.08 [0.33-13.25]    | 0.514    | 0.805   |
| SETD1A    | 101         | 4         | 3.96%         | 196          | 6         | 3.06%         | 0.77 [0.26-2.26]     | 0.685    | 0.943   |
| SETDB1    | 101         | 8         | 7.92%         | 196          | 16        | 8.16%         | 1.03 [0.49-2.17]     | 0.942    | 1.000   |
| SEZ6L2    | 101         | 5         | 4.95%         | 196          | 4         | 2.04%         | 0.40 [0.13-1.23]     | 0.179    | 0.535   |
| SEZ6      | 101         | 3         | 2.97%         | 196          | 6         | 3.06%         | 1.03 [0.32-3.36]     | 0.965    | 1.000   |
| SF3B2     | 101         | 0         | 0.00%         | 196          | 5         | 2.55%         | 2.2e+07 [0e+00-Inf]  | 0.992    | 1.000   |
| SF3B4     | 101         | 7         | 6.93%         | 196          | 13        | 6.63%         | 0.95 [0.43-2.12]     | 0.923    | 1.000   |
| SFRP1     | 101         | 13        | 12.87%        | 196          | 30        | 15.31%        | 1.22 [0.68-2.20]     | 0.573    | 0.860   |
| SRSF1     | 101         | 6         | 5.94%         | 196          | 25        | 12.76%        | 2.31 [1.06-5.03]     | 0.076    | 0.507   |
| SRSF2     | 101         | 3         | 2.97%         | 196          | 13        | 6.63%         | 2.32 [0.79-6.79]     | 0.197    | 0.570   |
| SRSF6     | 101         | 3         | 2.97%         | 196          | 6         | 3.06%         | 1.03 [0.32-3.36]     | 0.965    | 1.000   |
| SFT2D2    | 101         | 4         | 3.96%         | 196          | 13        | 6.63%         | 1.72 [0.66-4.51]     | 0.353    | 0.722   |
| SFTA3     | 101         | 0         | 0.00%         | 196          | 10        | 5.10%         | 4.6e+07 [0e+00-Inf]  | 0.992    | 1.000   |
| SFTPA1    | 101         | 0         | 0.00%         | 196          | 5         | 2.55%         | 2.2e+07 [0e+00-Inf]  | 0.992    | 1.000   |
| SGCA      | 101         | 5         | 4.95%         | 196          | 17        | 8.67%         | 1.82 [0.77-4.32]     | 0.252    | 0.623   |
| POMK      | 101         | 13        | 12.87%        | 196          | 23        | 11.73%        | 0.90 [0.49-1.66]     | 0.776    | 0.996   |
| SGK2      | 101         | 2         | 1.98%         | 196          | 4         | 2.04%         | 1.03 [0.24-4.35]     | 0.972    | 1.000   |
| SGK3      | 101         | 15        | 14.85%        | 196          | 39        | 19.90%        | 1.42 [0.82-2.46]     | 0.287    | 0.650   |
| SGSH      | 101         | 4         | 3.96%         | 196          | 14        | 7.14%         | 1.87 [0.72-4.85]     | 0.283    | 0.650   |
| SH2B1     | 101         | 6         | 5.94%         | 196          | 3         | 1.53%         | 0.25 [0.076-0.80]    | 0.051    | 0.507   |
| SH2D1B    | 101         | 5         | 4.95%         | 196          | 16        | 8.16%         | 1.71 [0.72-4.07]     | 0.311    | 0.680   |
| SH2D2A    | 101         | 7         | 6.93%         | 196          | 8         | 4.08%         | 0.57 [0.24-1.37]     | 0.294    | 0.650   |
| SH2D7     | 101         | 1         | 0.99%         | 196          | 4         | 2.04%         | 2.08 [0.33-13.25]    | 0.514    | 0.805   |
| SH3BP5L   | 101         | 5         | 4.95%         | 196          | 19        | 9.69%         | 2.06 [0.88-4.83]     | 0.163    | 0.535   |
| SHANK2    | 101         | 15        | 14.85%        | 196          | 35        | 17.86%        | 1.25 [0.72-2.17]     | 0.512    | 0.805   |
| SHARPIN   | 101         | 17        | 16.83%        | 196          | 51        | 26.02%        | 1.74 [1.04-2.90]     | 0.076    | 0.507   |
| SHC1      | 101         | 8         | 7.92%         | 196          | 15        | 7.65%         | 0.96 [0.46-2.04]     | 0.935    | 1.000   |
| SHE       | 101         | 7         | 6.93%         | 196          | 12        | 6.12%         | 0.88 [0.39-1.97]     | 0.788    | 0.996   |
| SHISA4    | 101         | 7         | 6.93%         | 196          | 24        | 12.24%        | 1.87 [0.90-3.92]     | 0.161    | 0.535   |
| SHISA7    | 101         | 2         | 1.98%         | 196          | 4         | 2.04%         | 1.03 [0.24-4.35]     | 0.972    | 1.000   |
| SHISA9    | 101         | 5         | 4.95%         | 196          | 4         | 2.04%         | 0.40 [0.13-1.23]     | 0.179    | 0.535   |
| SIAH2     | 101         | 3         | 2.97%         | 196          | 2         | 1.02%         | 0.34 [0.074-1.53]    | 0.237    | 0.599   |
| SIGLEC14  | 101         | 7         | 6.93%         | 196          | 14        | 7.14%         | 1.03 [0.47-2.28]     | 0.946    | 1.000   |
| SIGLEC9   | 101         | 1         | 0.99%         | 196          | 4         | 2.04%         | 2.08 [0.33-13.25]    | 0.514    | 0.805   |
| SIGMAR1   | 101         | 1         | 0.99%         | 196          | 4         | 2.04%         | 2.08 [0.33-13.25]    | 0.514    | 0.805   |
| SIPA1L2   | 101         | 7         | 6.93%         | 196          | 21        | 10.71%        | 1.61 [0.76-3.40]     | 0.294    | 0.650   |
| SIRPB1    | 101         | 11        | 10.89%        | 196          | 21        | 10.71%        | 0.98 [0.51-1.88]     | 0.963    | 1.000   |
| SIRT7     | 101         | 2         | 1.98%         | 196          | 13        | 6.63%         | 3.52 [0.99-12.47]    | 0.102    | 0.507   |
| SKA2      | 101         | 8         | 7.92%         | 196          | 30        | 15.31%        | 2.10 [1.06-4.18]     | 0.076    | 0.507   |
| SKAP1     | 101         | 2         | 1.98%         | 196          | 13        | 6.63%         | 3.52 [0.99-12.47]    | 0.102    | 0.507   |
| SKAP2     | 101         | 0         | 0.00%         | 196          | 6         | 3.06%         | 2.7e+07 [0e+00-Inf]  | 0.992    | 1.000   |
| SKIL      | 101         | 2         | 1.98%         | 196          | 3         | 1.53%         | 0.77 [0.17-3.50]     | 0.776    | 0.996   |
| SLA2      | 101         | 4         | 3.96%         | 196          | 6         | 3.06%         | 0.77 [0.26-2.26]     | 0.685    | 0.943   |
| SLAMF1    | 101         | 6         | 5.94%         | 196          | 14        | 7.14%         | 1.22 [0.53-2.79]     | 0.696    | 0.951   |
| SLAMF6    | 101         | 5         | 4.95%         | 196          | 14        | 7.14%         | 1.48 [0.61-3.57]     | 0.467    | 0.805   |
| SLAMF7    | 101         | 6         | 5.94%         | 196          | 15        | 7.65%         | 1.31 [0.58-2.98]     | 0.586    | 0.869   |
| SLAMF8    | 101         | 6         | 5.94%         | 196          | 10        | 5.10%         | 0.85 [0.36-2.04]     | 0.762    | 0.996   |
| SLAMF9    | 101         | 6         | 5.94%         | 196          | 11        | 5.61%         | 0.94 [0.40-2.23]     | 0.908    | 1.000   |
| SLA       | 101         | 15        | 14.85%        | 196          | 57        | 29.08%        | 2.35 [1.39-3.99]     | 7.74E-03 | 0.507   |

| Symbol   | CINSARC Low |           |               | CINSARC High |           |               | CINSARC High vs. Low |          |         |
|----------|-------------|-----------|---------------|--------------|-----------|---------------|----------------------|----------|---------|
|          | N tested    | N altered | Fq alteration | N tested     | N altered | Fq alteration | OR [95%CI]           | p-value* | q-value |
| SLC10A5  | 101         | 18        | 17.82%        | 196          | 46        | 23.47%        | 1.41 [0.85-2.35]     | 0.263    | 0.643   |
| SLC12A5  | 101         | 5         | 4.95%         | 196          | 4         | 2.04%         | 0.40 [0.13-1.23]     | 0.179    | 0.535   |
| SLC13A2  | 101         | 3         | 2.97%         | 196          | 8         | 4.08%         | 1.39 [0.45-4.31]     | 0.632    | 0.909   |
| SLC13A3  | 101         | 4         | 3.96%         | 196          | 7         | 3.57%         | 0.90 [0.31-2.57]     | 0.867    | 1.000   |
| SLC16A3  | 101         | 3         | 2.97%         | 196          | 13        | 6.63%         | 2.32 [0.79-6.79]     | 0.197    | 0.570   |
| SLC16A5  | 101         | 5         | 4.95%         | 196          | 12        | 6.12%         | 1.25 [0.51-3.08]     | 0.681    | 0.943   |
| SLC16A6  | 101         | 10        | 9.90%         | 196          | 28        | 14.29%        | 1.52 [0.80-2.88]     | 0.286    | 0.650   |
| SLC17A6  | 101         | 3         | 2.97%         | 196          | 2         | 1.02%         | 0.34 [0.074-1.53]    | 0.237    | 0.599   |
| SLC17A9  | 101         | 7         | 6.93%         | 196          | 14        | 7.14%         | 1.03 [0.47-2.28]     | 0.946    | 1.000   |
| SLC19A2  | 101         | 4         | 3.96%         | 196          | 13        | 6.63%         | 1.72 [0.66-4.51]     | 0.353    | 0.722   |
| SLC1A2   | 101         | 1         | 0.99%         | 196          | 4         | 2.04%         | 2.08 [0.33-13.25]    | 0.514    | 0.805   |
| SLC20A2  | 101         | 15        | 14.85%        | 196          | 31        | 15.82%        | 1.08 [0.61-1.89]     | 0.828    | 1.000   |
| SLC25A10 | 101         | 2         | 1.98%         | 196          | 12        | 6.12%         | 3.23 [0.90-11.53]    | 0.130    | 0.535   |
| SLC25A19 | 101         | 5         | 4.95%         | 196          | 11        | 5.61%         | 1.14 [0.46-2.84]     | 0.811    | 1.000   |
| SLC25A21 | 101         | 0         | 0.00%         | 196          | 11        | 5.61%         | 5.1e+07 [0e+00-Inf]  | 0.992    | 1.000   |
| SLC25A32 | 101         | 16        | 15.84%        | 196          | 55        | 28.06%        | 2.07 [1.23-3.48]     | 2.09E-02 | 0.507   |
| SLC25A44 | 101         | 6         | 5.94%         | 196          | 9         | 4.59%         | 0.76 [0.31-1.86]     | 0.616    | 0.898   |
| SLC26A11 | 101         | 4         | 3.96%         | 196          | 14        | 7.14%         | 1.87 [0.72-4.85]     | 0.283    | 0.650   |
| SLC26A7  | 101         | 17        | 16.83%        | 196          | 47        | 23.98%        | 1.56 [0.93-2.61]     | 0.158    | 0.535   |
| SLC26A9  | 101         | 7         | 6.93%         | 196          | 24        | 12.24%        | 1.87 [0.90-3.92]     | 0.161    | 0.535   |
| SLC27A3  | 101         | 7         | 6.93%         | 196          | 12        | 6.12%         | 0.88 [0.39-1.97]     | 0.788    | 0.996   |
| SLC28A1  | 101         | 1         | 0.99%         | 196          | 6         | 3.06%         | 3.16 [0.53-18.88]    | 0.290    | 0.650   |
| SLC29A2  | 101         | 5         | 4.95%         | 196          | 7         | 3.57%         | 0.71 [0.27-1.90]     | 0.569    | 0.855   |
| SLC2A10  | 101         | 5         | 4.95%         | 196          | 7         | 3.57%         | 0.71 [0.27-1.90]     | 0.569    | 0.855   |
| SLC2A4RG | 101         | 7         | 6.93%         | 196          | 15        | 7.65%         | 1.11 [0.51-2.43]     | 0.822    | 1.000   |
| SLC30A10 | 101         | 6         | 5.94%         | 196          | 20        | 10.20%        | 1.80 [0.81-3.98]     | 0.224    | 0.596   |
| SLC30A1  | 101         | 7         | 6.93%         | 196          | 20        | 10.20%        | 1.53 [0.72-3.24]     | 0.355    | 0.722   |
| SLC30A8  | 101         | 17        | 16.83%        | 196          | 57        | 29.08%        | 2.03 [1.22-3.37]     | 2.23E-02 | 0.507   |
| SLC32A1  | 101         | 2         | 1.98%         | 196          | 5         | 2.55%         | 1.30 [0.32-5.21]     | 0.759    | 0.996   |
| SLC35B1  | 101         | 4         | 3.96%         | 196          | 16        | 8.16%         | 2.16 [0.84-5.53]     | 0.180    | 0.535   |
| SLC35C2  | 101         | 4         | 3.96%         | 196          | 6         | 3.06%         | 0.77 [0.26-2.26]     | 0.685    | 0.943   |
| SLC35E3  | 101         | 2         | 1.98%         | 196          | 17        | 8.67%         | 4.70 [1.35-16.35]    | 4.11E-02 | 0.507   |
| SLC35F3  | 101         | 7         | 6.93%         | 196          | 20        | 10.20%        | 1.53 [0.72-3.24]     | 0.355    | 0.722   |
| SLC37A3  | 101         | 1         | 0.99%         | 196          | 4         | 2.04%         | 2.08 [0.33-13.25]    | 0.514    | 0.805   |
| SLC38A10 | 101         | 2         | 1.98%         | 196          | 12        | 6.12%         | 3.23 [0.90-11.53]    | 0.130    | 0.535   |
| SLC39A11 | 101         | 5         | 4.95%         | 196          | 15        | 7.65%         | 1.59 [0.66-3.81]     | 0.382    | 0.750   |
| SLC39A1  | 101         | 7         | 6.93%         | 196          | 13        | 6.63%         | 0.95 [0.43-2.12]     | 0.923    | 1.000   |
| SLC39A4  | 101         | 18        | 17.82%        | 196          | 49        | 25.00%        | 1.54 [0.93-2.55]     | 0.163    | 0.535   |
| SLC41A1  | 101         | 7         | 6.93%         | 196          | 24        | 12.24%        | 1.87 [0.90-3.92]     | 0.161    | 0.535   |
| SLC45A3  | 101         | 7         | 6.93%         | 196          | 27        | 13.78%        | 2.15 [1.03-4.45]     | 0.085    | 0.507   |
| SLC45A4  | 101         | 18        | 17.82%        | 196          | 49        | 25.00%        | 1.54 [0.93-2.55]     | 0.163    | 0.535   |
| SLC46A1  | 101         | 3         | 2.97%         | 196          | 7         | 3.57%         | 1.21 [0.38-3.83]     | 0.786    | 0.996   |
| SLC46A3  | 101         | 0         | 0.00%         | 196          | 5         | 2.55%         | 2.2e+07 [0e+00-Inf]  | 0.992    | 1.000   |
| SLC47A1  | 101         | 4         | 3.96%         | 196          | 1         | 0.51%         | 0.12 [0.02-0.79]     | 0.064    | 0.507   |
| SLC47A2  | 101         | 4         | 3.96%         | 196          | 1         | 0.51%         | 0.12 [0.02-0.79]     | 0.064    | 0.507   |
| SLC5A11  | 101         | 5         | 4.95%         | 196          | 3         | 1.53%         | 0.30 [0.088-1.01]    | 0.103    | 0.507   |
| SLC5A2   | 101         | 4         | 3.96%         | 196          | 4         | 2.04%         | 0.51 [0.16-1.65]     | 0.342    | 0.716   |
| SLC6A10P | 101         | 5         | 4.95%         | 196          | 3         | 1.53%         | 0.30 [0.088-1.01]    | 0.103    | 0.507   |
| SLC6A4   | 101         | 2         | 1.98%         | 196          | 5         | 2.55%         | 1.30 [0.32-5.21]     | 0.759    | 0.996   |
| SLC7A13  | 101         | 18        | 17.82%        | 196          | 47        | 23.98%        | 1.45 [0.87-2.42]     | 0.226    | 0.598   |
| SLC7A5P1 | 101         | 5         | 4.95%         | 196          | 3         | 1.53%         | 0.30 [0.088-1.01]    | 0.103    | 0.507   |
| SLC7A5P2 | 101         | 6         | 5.94%         | 196          | 2         | 1.02%         | 0.16 [0.042-0.64]    | 2.82E-02 | 0.507   |
| SLC9C2   | 101         | 5         | 4.95%         | 196          | 13        | 6.63%         | 1.36 [0.56-3.32]     | 0.566    | 0.852   |
| SLC9A3R1 | 101         | 5         | 4.95%         | 196          | 14        | 7.14%         | 1.48 [0.61-3.57]     | 0.467    | 0.805   |
| SLC9A3R2 | 101         | 6         | 5.94%         | 196          | 5         | 2.55%         | 0.41 [0.15-1.15]     | 0.154    | 0.535   |
| SLC9A8   | 101         | 9         | 8.91%         | 196          | 15        | 7.65%         | 0.85 [0.41-1.75]     | 0.707    | 0.962   |
| SLCO2B1  | 101         | 5         | 4.95%         | 196          | 16        | 8.16%         | 1.71 [0.72-4.07]     | 0.311    | 0.680   |
| SLCO3A1  | 101         | 0         | 0.00%         | 196          | 6         | 3.06%         | 2.7e+07 [0e+00-Inf]  | 0.992    | 1.000   |
| SLCO4A1  | 101         | 6         | 5.94%         | 196          | 13        | 6.63%         | 1.12 [0.49-2.60]     | 0.817    | 1.000   |
| SLCO5A1  | 101         | 16        | 15.84%        | 196          | 40        | 20.41%        | 1.36 [0.80-2.33]     | 0.342    | 0.716   |
| SLFN11   | 101         | 1         | 0.99%         | 196          | 4         | 2.04%         | 2.08 [0.33-13.25]    | 0.514    | 0.805   |
| SLFN5    | 101         | 1         | 0.99%         | 196          | 4         | 2.04%         | 2.08 [0.33-13.25]    | 0.514    | 0.805   |
| SLPI     | 101         | 5         | 4.95%         | 196          | 3         | 1.53%         | 0.30 [0.088-1.01]    | 0.103    | 0.507   |
| SLURP1   | 101         | 16        | 15.84%        | 196          | 49        | 25.00%        | 1.77 [1.05-2.99]     | 0.073    | 0.507   |
| SMARCD2  | 101         | 8         | 7.92%         | 196          | 29        | 14.80%        | 2.02 [1.01-4.03]     | 0.094    | 0.507   |
| SMARCE1  | 101         | 4         | 3.96%         | 196          | 5         | 2.55%         | 0.63 [0.21-1.95]     | 0.505    | 0.805   |
| SMCP     | 101         | 7         | 6.93%         | 196          | 11        | 5.61%         | 0.80 [0.35-1.82]     | 0.652    | 0.928   |
| SMG1     | 101         | 5         | 4.95%         | 196          | 4         | 2.04%         | 0.40 [0.13-1.23]     | 0.179    | 0.535   |
| SMG5     | 101         | 6         | 5.94%         | 196          | 9         | 4.59%         | 0.76 [0.31-1.86]     | 0.616    | 0.898   |
| SMG7     | 101         | 5         | 4.95%         | 196          | 19        | 9.69%         | 2.06 [0.88-4.83]     | 0.163    | 0.535   |
| SMURF2   | 101         | 8         | 7.92%         | 196          | 27        | 13.78%        | 1.86 [0.93-3.72]     | 0.143    | 0.535   |

| Symbol   | CINSARC Low |           |               | CINSARC High |           |               | CINSARC High vs. Low |          |         |
|----------|-------------|-----------|---------------|--------------|-----------|---------------|----------------------|----------|---------|
|          | N tested    | N altered | Fq alteration | N tested     | N altered | Fq alteration | OR [95%CI]           | p-value* | q-value |
| SMYD2    | 101         | 6         | 5.94%         | 196          | 22        | 11.22%        | 2.00 [0.91-4.39]     | 0.146    | 0.535   |
| SMYD3    | 101         | 5         | 4.95%         | 196          | 18        | 9.18%         | 1.94 [0.82-4.58]     | 0.203    | 0.570   |
| SNAI1    | 101         | 8         | 7.92%         | 196          | 16        | 8.16%         | 1.03 [0.49-2.17]     | 0.942    | 1.000   |
| SNAI2    | 101         | 13        | 12.87%        | 196          | 25        | 12.76%        | 0.99 [0.54-1.81]     | 0.977    | 1.000   |
| SNAP47   | 101         | 6         | 5.94%         | 196          | 21        | 10.71%        | 1.90 [0.86-4.19]     | 0.181    | 0.535   |
| SNAPIN   | 101         | 7         | 6.93%         | 196          | 12        | 6.12%         | 0.88 [0.39-1.97]     | 0.788    | 0.996   |
| SNAR-1   | 101         | 2         | 1.98%         | 196          | 3         | 1.53%         | 0.77 [0.17-3.50]     | 0.776    | 0.996   |
| SNF8     | 101         | 2         | 1.98%         | 196          | 16        | 8.16%         | 4.40 [1.26-15.37]    | 0.051    | 0.507   |
| SNHG11   | 101         | 4         | 3.96%         | 196          | 4         | 2.04%         | 0.51 [0.16-1.65]     | 0.342    | 0.716   |
| SNHG6    | 101         | 15        | 14.85%        | 196          | 40        | 20.41%        | 1.47 [0.85-2.53]     | 0.245    | 0.616   |
| SNHG9    | 101         | 6         | 5.94%         | 196          | 5         | 2.55%         | 0.41 [0.15-1.15]     | 0.154    | 0.535   |
| SNN      | 101         | 5         | 4.95%         | 196          | 3         | 1.53%         | 0.30 [0.088-1.01]    | 0.103    | 0.507   |
| SNORA10  | 101         | 6         | 5.94%         | 196          | 5         | 2.55%         | 0.41 [0.15-1.15]     | 0.154    | 0.535   |
| SNORA14B | 101         | 7         | 6.93%         | 196          | 18        | 9.18%         | 1.36 [0.63-2.91]     | 0.509    | 0.805   |
| SNORA16B | 101         | 7         | 6.93%         | 196          | 21        | 10.71%        | 1.61 [0.76-3.40]     | 0.294    | 0.650   |
| SNORA21  | 101         | 4         | 3.96%         | 196          | 9         | 4.59%         | 1.17 [0.43-3.20]     | 0.801    | 1.000   |
| SNORA30  | 101         | 4         | 3.96%         | 196          | 5         | 2.55%         | 0.63 [0.21-1.95]     | 0.505    | 0.805   |
| SNORA36B | 101         | 6         | 5.94%         | 196          | 19        | 9.69%         | 1.70 [0.77-3.78]     | 0.274    | 0.643   |
| SNORA37  | 101         | 2         | 1.98%         | 196          | 3         | 1.53%         | 0.77 [0.17-3.50]     | 0.776    | 0.996   |
| SNORA38B | 101         | 9         | 8.91%         | 196          | 29        | 14.80%        | 1.78 [0.91-3.44]     | 0.155    | 0.535   |
| SNORA64  | 101         | 6         | 5.94%         | 196          | 5         | 2.55%         | 0.41 [0.15-1.15]     | 0.154    | 0.535   |
| SNORA71A | 101         | 4         | 3.96%         | 196          | 4         | 2.04%         | 0.51 [0.16-1.65]     | 0.342    | 0.716   |
| SNORA71B | 101         | 4         | 3.96%         | 196          | 4         | 2.04%         | 0.51 [0.16-1.65]     | 0.342    | 0.716   |
| SNORA71C | 101         | 4         | 3.96%         | 196          | 4         | 2.04%         | 0.51 [0.16-1.65]     | 0.342    | 0.716   |
| SNORA71D | 101         | 4         | 3.96%         | 196          | 4         | 2.04%         | 0.51 [0.16-1.65]     | 0.342    | 0.716   |
| SNORA72  | 101         | 16        | 15.84%        | 196          | 54        | 27.55%        | 2.02 [1.20-3.40]     | 2.60E-02 | 0.507   |
| SNORA77  | 101         | 7         | 6.93%         | 196          | 28        | 14.29%        | 2.24 [1.08-4.63]     | 0.068    | 0.507   |
| SNORA78  | 101         | 6         | 5.94%         | 196          | 5         | 2.55%         | 0.41 [0.15-1.15]     | 0.154    | 0.535   |
| SNORD104 | 101         | 7         | 6.93%         | 196          | 27        | 13.78%        | 2.15 [1.03-4.45]     | 0.085    | 0.507   |
| SNORD124 | 101         | 5         | 4.95%         | 196          | 11        | 5.61%         | 1.14 [0.46-2.84]     | 0.811    | 1.000   |
| SNORD12B | 101         | 7         | 6.93%         | 196          | 7         | 3.57%         | 0.50 [0.20-1.23]     | 0.203    | 0.570   |
| SNORD12C | 101         | 7         | 6.93%         | 196          | 7         | 3.57%         | 0.50 [0.20-1.23]     | 0.203    | 0.570   |
| SNORD12  | 101         | 7         | 6.93%         | 196          | 7         | 3.57%         | 0.50 [0.20-1.23]     | 0.203    | 0.570   |
| SNORD15A | 101         | 5         | 4.95%         | 196          | 16        | 8.16%         | 1.71 [0.72-4.07]     | 0.311    | 0.680   |
| SNORD15B | 101         | 4         | 3.96%         | 196          | 16        | 8.16%         | 2.16 [0.84-5.53]     | 0.180    | 0.535   |
| SNORD1A  | 101         | 3         | 2.97%         | 196          | 15        | 7.65%         | 2.71 [0.94-7.82]     | 0.122    | 0.534   |
| SNORD1B  | 101         | 3         | 2.97%         | 196          | 15        | 7.65%         | 2.71 [0.94-7.82]     | 0.122    | 0.534   |
| SNORD1C  | 101         | 3         | 2.97%         | 196          | 15        | 7.65%         | 2.71 [0.94-7.82]     | 0.122    | 0.534   |
| SNORD42A | 101         | 3         | 2.97%         | 196          | 8         | 4.08%         | 1.39 [0.45-4.31]     | 0.632    | 0.909   |
| SNORD42B | 101         | 3         | 2.97%         | 196          | 8         | 4.08%         | 1.39 [0.45-4.31]     | 0.632    | 0.909   |
| SNORD44  | 101         | 5         | 4.95%         | 196          | 13        | 6.63%         | 1.36 [0.56-3.32]     | 0.566    | 0.852   |
| SNORD47  | 101         | 5         | 4.95%         | 196          | 13        | 6.63%         | 1.36 [0.56-3.32]     | 0.566    | 0.852   |
| SNORD4A  | 101         | 3         | 2.97%         | 196          | 8         | 4.08%         | 1.39 [0.45-4.31]     | 0.632    | 0.909   |
| SNORD4B  | 101         | 3         | 2.97%         | 196          | 8         | 4.08%         | 1.39 [0.45-4.31]     | 0.632    | 0.909   |
| SNORD54  | 101         | 14        | 13.86%        | 196          | 31        | 15.82%        | 1.17 [0.66-2.07]     | 0.656    | 0.931   |
| SNORD60  | 101         | 6         | 5.94%         | 196          | 5         | 2.55%         | 0.41 [0.15-1.15]     | 0.154    | 0.535   |
| SNORD66  | 101         | 3         | 2.97%         | 196          | 2         | 1.02%         | 0.34 [0.074-1.53]    | 0.237    | 0.599   |
| SNORD74  | 101         | 5         | 4.95%         | 196          | 13        | 6.63%         | 1.36 [0.56-3.32]     | 0.566    | 0.852   |
| SNORD75  | 101         | 5         | 4.95%         | 196          | 13        | 6.63%         | 1.36 [0.56-3.32]     | 0.566    | 0.852   |
| SNORD76  | 101         | 5         | 4.95%         | 196          | 13        | 6.63%         | 1.36 [0.56-3.32]     | 0.566    | 0.852   |
| SNORD77  | 101         | 5         | 4.95%         | 196          | 13        | 6.63%         | 1.36 [0.56-3.32]     | 0.566    | 0.852   |
| SNORD78  | 101         | 5         | 4.95%         | 196          | 13        | 6.63%         | 1.36 [0.56-3.32]     | 0.566    | 0.852   |
| SNORD79  | 101         | 5         | 4.95%         | 196          | 13        | 6.63%         | 1.36 [0.56-3.32]     | 0.566    | 0.852   |
| SNORD80  | 101         | 5         | 4.95%         | 196          | 13        | 6.63%         | 1.36 [0.56-3.32]     | 0.566    | 0.852   |
| SNORD81  | 101         | 5         | 4.95%         | 196          | 13        | 6.63%         | 1.36 [0.56-3.32]     | 0.566    | 0.852   |
| SNORD87  | 101         | 15        | 14.85%        | 196          | 40        | 20.41%        | 1.47 [0.85-2.53]     | 0.245    | 0.616   |
| SNORD93  | 101         | 0         | 0.00%         | 196          | 6         | 3.06%         | 2.7e+07 [0e+00-Inf]  | 0.992    | 1.000   |
| SNRNP25  | 101         | 7         | 6.93%         | 196          | 4         | 2.04%         | 0.28 [0.098-0.80]    | 4.63E-02 | 0.507   |
| SNRPA1   | 101         | 1         | 0.99%         | 196          | 4         | 2.04%         | 2.08 [0.33-13.25]    | 0.514    | 0.805   |
| SNRPE    | 101         | 7         | 6.93%         | 196          | 26        | 13.27%        | 2.05 [0.99-4.27]     | 0.106    | 0.507   |
| SNTB1    | 101         | 14        | 13.86%        | 196          | 53        | 27.04%        | 2.30 [1.34-3.96]     | 1.14E-02 | 0.507   |
| SNTG1    | 101         | 11        | 10.89%        | 196          | 24        | 12.24%        | 1.14 [0.60-2.16]     | 0.732    | 0.990   |
| SNX10    | 101         | 0         | 0.00%         | 196          | 5         | 2.55%         | 2.2e+07 [0e+00-Inf]  | 0.992    | 1.000   |
| SNX11    | 101         | 2         | 1.98%         | 196          | 12        | 6.12%         | 3.23 [0.90-11.53]    | 0.130    | 0.535   |
| SNX16    | 101         | 18        | 17.82%        | 196          | 45        | 22.96%        | 1.37 [0.82-2.29]     | 0.306    | 0.676   |
| SNX21    | 101         | 5         | 4.95%         | 196          | 4         | 2.04%         | 0.40 [0.13-1.23]     | 0.179    | 0.535   |
| SNX27    | 101         | 6         | 5.94%         | 196          | 12        | 6.12%         | 1.03 [0.44-2.41]     | 0.950    | 1.000   |
| SNX31    | 101         | 15        | 14.85%        | 196          | 55        | 28.06%        | 2.24 [1.32-3.80]     | 1.24E-02 | 0.507   |
| SNX3     | 101         | 1         | 0.99%         | 196          | 5         | 2.55%         | 2.62 [0.43-16.05]    | 0.383    | 0.750   |
| SNX6     | 101         | 0         | 0.00%         | 196          | 9         | 4.59%         | 4.1e+07 [0e+00-Inf]  | 0.992    | 1.000   |
| SOAT1    | 101         | 5         | 4.95%         | 196          | 19        | 9.69%         | 2.06 [0.88-4.83]     | 0.163    | 0.535   |

| Symbol  | CINSARC Low |           |               | CINSARC High |           |               | CINSARC High vs. Low |          |         |
|---------|-------------|-----------|---------------|--------------|-----------|---------------|----------------------|----------|---------|
|         | N tested    | N altered | Fq alteration | N tested     | N altered | Fq alteration | OR [95%CI]           | p-value* | q-value |
| SOBP    | 101         | 1         | 0.99%         | 196          | 6         | 3.06%         | 3.16 [0.53-18.88]    | 0.290    | 0.650   |
| SOCS1   | 101         | 5         | 4.95%         | 196          | 4         | 2.04%         | 0.40 [0.13-1.23]     | 0.179    | 0.535   |
| SOCS3   | 101         | 4         | 3.96%         | 196          | 14        | 7.14%         | 1.87 [0.72-4.85]     | 0.283    | 0.650   |
| SOCS7   | 101         | 5         | 4.95%         | 196          | 8         | 4.08%         | 0.82 [0.31-2.13]     | 0.729    | 0.986   |
| CAPN15  | 101         | 7         | 6.93%         | 196          | 4         | 2.04%         | 0.28 [0.098-0.80]    | 4.63E-02 | 0.507   |
| SOX13   | 101         | 7         | 6.93%         | 196          | 28        | 14.29%        | 2.24 [1.08-4.63]     | 0.068    | 0.507   |
| SOX17   | 101         | 13        | 12.87%        | 196          | 29        | 14.80%        | 1.18 [0.65-2.12]     | 0.652    | 0.928   |
| SOX18   | 101         | 7         | 6.93%         | 196          | 11        | 5.61%         | 0.80 [0.35-1.82]     | 0.652    | 0.928   |
| SOX2-OT | 101         | 4         | 3.96%         | 196          | 2         | 1.02%         | 0.25 [0.059-1.05]    | 0.113    | 0.511   |
| SOX2    | 101         | 4         | 3.96%         | 196          | 2         | 1.02%         | 0.25 [0.059-1.05]    | 0.113    | 0.511   |
| SOX6    | 101         | 1         | 0.99%         | 196          | 4         | 2.04%         | 2.08 [0.33-13.25]    | 0.514    | 0.805   |
| SOX8    | 101         | 6         | 5.94%         | 196          | 4         | 2.04%         | 0.33 [0.11-0.97]     | 0.092    | 0.507   |
| SOX9    | 101         | 5         | 4.95%         | 196          | 16        | 8.16%         | 1.71 [0.72-4.07]     | 0.311    | 0.680   |
| SP2     | 101         | 1         | 0.99%         | 196          | 10        | 5.10%         | 5.38 [0.95-30.54]    | 0.111    | 0.511   |
| SP4     | 101         | 0         | 0.00%         | 196          | 6         | 3.06%         | 2.7e+07 [0e+00-Inf]  | 0.992    | 1.000   |
| SP6     | 101         | 1         | 0.99%         | 196          | 10        | 5.10%         | 5.38 [0.95-30.54]    | 0.111    | 0.511   |
| SP8     | 101         | 0         | 0.00%         | 196          | 6         | 3.06%         | 2.7e+07 [0e+00-Inf]  | 0.992    | 1.000   |
| SPACA3  | 101         | 2         | 1.98%         | 196          | 5         | 2.55%         | 1.30 [0.32-5.21]     | 0.759    | 0.996   |
| SPAG1   | 101         | 15        | 14.85%        | 196          | 54        | 27.55%        | 2.18 [1.28-3.70]     | 1.56E-02 | 0.507   |
| SPAG4   | 101         | 4         | 3.96%         | 196          | 8         | 4.08%         | 1.03 [0.37-2.88]     | 0.960    | 1.000   |
| SPAG5   | 101         | 3         | 2.97%         | 196          | 8         | 4.08%         | 1.39 [0.45-4.31]     | 0.632    | 0.909   |
| SPAG9   | 101         | 4         | 3.96%         | 196          | 18        | 9.18%         | 2.45 [0.97-6.23]     | 0.114    | 0.512   |
| SPATA17 | 101         | 6         | 5.94%         | 196          | 20        | 10.20%        | 1.80 [0.81-3.98]     | 0.224    | 0.596   |
| SPATA20 | 101         | 4         | 3.96%         | 196          | 19        | 9.69%         | 2.60 [1.03-6.59]     | 0.090    | 0.507   |
| SPATA2  | 101         | 9         | 8.91%         | 196          | 15        | 7.65%         | 0.85 [0.41-1.75]     | 0.707    | 0.962   |
| SPATA8  | 101         | 0         | 0.00%         | 196          | 7         | 3.57%         | 3.2e+07 [0e+00-Inf]  | 0.992    | 1.000   |
| SPATC1  | 101         | 17        | 16.83%        | 196          | 51        | 26.02%        | 1.74 [1.04-2.90]     | 0.076    | 0.507   |
| SPCS2   | 101         | 6         | 5.94%         | 196          | 15        | 7.65%         | 1.31 [0.58-2.98]     | 0.586    | 0.869   |
| SPHAR   | 101         | 6         | 5.94%         | 196          | 19        | 9.69%         | 1.70 [0.77-3.78]     | 0.274    | 0.643   |
| SPHK1   | 101         | 3         | 2.97%         | 196          | 15        | 7.65%         | 2.71 [0.94-7.82]     | 0.122    | 0.534   |
| EPPIN   | 101         | 5         | 4.95%         | 196          | 3         | 1.53%         | 0.30 [0.088-1.01]    | 0.103    | 0.507   |
| SPINT3  | 101         | 5         | 4.95%         | 196          | 3         | 1.53%         | 0.30 [0.088-1.01]    | 0.103    | 0.507   |
| SPINT4  | 101         | 5         | 4.95%         | 196          | 3         | 1.53%         | 0.30 [0.088-1.01]    | 0.103    | 0.507   |
| SPNS1   | 101         | 6         | 5.94%         | 196          | 3         | 1.53%         | 0.25 [0.076-0.80]    | 0.051    | 0.507   |
| SPN     | 101         | 5         | 4.95%         | 196          | 3         | 1.53%         | 0.30 [0.088-1.01]    | 0.103    | 0.507   |
| SPO11   | 101         | 9         | 8.91%         | 196          | 17        | 8.67%         | 0.97 [0.48-1.97]     | 0.945    | 1.000   |
| SPOP    | 101         | 5         | 4.95%         | 196          | 16        | 8.16%         | 1.71 [0.72-4.07]     | 0.311    | 0.680   |
| SPRR1A  | 101         | 7         | 6.93%         | 196          | 11        | 5.61%         | 0.80 [0.35-1.82]     | 0.652    | 0.928   |
| SPRR1B  | 101         | 7         | 6.93%         | 196          | 12        | 6.12%         | 0.88 [0.39-1.97]     | 0.788    | 0.996   |
| SPRR2A  | 101         | 7         | 6.93%         | 196          | 12        | 6.12%         | 0.88 [0.39-1.97]     | 0.788    | 0.996   |
| SPRR2B  | 101         | 7         | 6.93%         | 196          | 12        | 6.12%         | 0.88 [0.39-1.97]     | 0.788    | 0.996   |
| SPRR2C  | 101         | 7         | 6.93%         | 196          | 11        | 5.61%         | 0.80 [0.35-1.82]     | 0.652    | 0.928   |
| SPRR2D  | 101         | 7         | 6.93%         | 196          | 12        | 6.12%         | 0.88 [0.39-1.97]     | 0.788    | 0.996   |
| SPRR2E  | 101         | 7         | 6.93%         | 196          | 12        | 6.12%         | 0.88 [0.39-1.97]     | 0.788    | 0.996   |
| SPRR2F  | 101         | 7         | 6.93%         | 196          | 12        | 6.12%         | 0.88 [0.39-1.97]     | 0.788    | 0.996   |
| SPRR2G  | 101         | 7         | 6.93%         | 196          | 11        | 5.61%         | 0.80 [0.35-1.82]     | 0.652    | 0.928   |
| SPRR3   | 101         | 7         | 6.93%         | 196          | 12        | 6.12%         | 0.88 [0.39-1.97]     | 0.788    | 0.996   |
| SPRR4   | 101         | 7         | 6.93%         | 196          | 11        | 5.61%         | 0.80 [0.35-1.82]     | 0.652    | 0.928   |
| SPSB3   | 101         | 6         | 5.94%         | 196          | 5         | 2.55%         | 0.41 [0.15-1.15]     | 0.154    | 0.535   |
| SPTA1   | 101         | 6         | 5.94%         | 196          | 9         | 4.59%         | 0.76 [0.31-1.86]     | 0.616    | 0.898   |
| SPTBN2  | 101         | 7         | 6.93%         | 196          | 13        | 6.63%         | 0.95 [0.43-2.12]     | 0.923    | 1.000   |
| SQL     | 101         | 16        | 15.84%        | 196          | 57        | 29.08%        | 2.18 [1.30-3.66]     | 1.33E-02 | 0.507   |
| SRCAP   | 101         | 4         | 3.96%         | 196          | 5         | 2.55%         | 0.63 [0.21-1.95]     | 0.505    | 0.805   |
| SRCIN1  | 101         | 5         | 4.95%         | 196          | 8         | 4.08%         | 0.82 [0.31-2.13]     | 0.729    | 0.986   |
| SRC     | 101         | 5         | 4.95%         | 196          | 3         | 1.53%         | 0.30 [0.088-1.01]    | 0.103    | 0.507   |
| SRGAP1  | 101         | 2         | 1.98%         | 196          | 5         | 2.55%         | 1.30 [0.32-5.21]     | 0.759    | 0.996   |
| SRGAP2  | 101         | 6         | 5.94%         | 196          | 24        | 12.24%        | 2.21 [1.01-4.82]     | 0.095    | 0.507   |
| SRL     | 101         | 5         | 4.95%         | 196          | 6         | 3.06%         | 0.61 [0.22-1.68]     | 0.418    | 0.779   |
| SRMS    | 101         | 6         | 5.94%         | 196          | 15        | 7.65%         | 1.31 [0.58-2.98]     | 0.586    | 0.869   |
| SRP54   | 101         | 0         | 0.00%         | 196          | 9         | 4.59%         | 4.1e+07 [0e+00-Inf]  | 0.992    | 1.000   |
| SRP68   | 101         | 4         | 3.96%         | 196          | 13        | 6.63%         | 1.72 [0.66-4.51]     | 0.353    | 0.722   |
| SRP9    | 101         | 6         | 5.94%         | 196          | 18        | 9.18%         | 1.60 [0.72-3.57]     | 0.335    | 0.716   |
| SRRM2   | 101         | 6         | 5.94%         | 196          | 5         | 2.55%         | 0.41 [0.15-1.15]     | 0.154    | 0.535   |
| SRY     | 101         | 0         | 0.00%         | 196          | 0         | 0.00%         | 1.00 [0e+00-Inf]     | 1.000    | 1.000   |
| SS18L1  | 101         | 7         | 6.93%         | 196          | 12        | 6.12%         | 0.88 [0.39-1.97]     | 0.788    | 0.996   |
| SSC5D   | 101         | 2         | 1.98%         | 196          | 4         | 2.04%         | 1.03 [0.24-4.35]     | 0.972    | 1.000   |
| SSH2    | 101         | 2         | 1.98%         | 196          | 5         | 2.55%         | 1.30 [0.32-5.21]     | 0.759    | 0.996   |
| SSH3    | 101         | 10        | 9.90%         | 196          | 16        | 8.16%         | 0.81 [0.40-1.62]     | 0.616    | 0.898   |
| SSR2    | 101         | 7         | 6.93%         | 196          | 10        | 5.10%         | 0.72 [0.31-1.67]     | 0.522    | 0.815   |
| SSTR1   | 101         | 0         | 0.00%         | 196          | 9         | 4.59%         | 4.1e+07 [0e+00-Inf]  | 0.992    | 1.000   |
| SSTR2   | 101         | 5         | 4.95%         | 196          | 18        | 9.18%         | 1.94 [0.82-4.58]     | 0.203    | 0.570   |

| Symbol      | CINSARC Low |           |               | CINSARC High |           |               | CINSARC High vs. Low |          |         |
|-------------|-------------|-----------|---------------|--------------|-----------|---------------|----------------------|----------|---------|
|             | N tested    | N altered | Fq alteration | N tested     | N altered | Fq alteration | OR [95%CI]           | p-value* | q-value |
| SSTR5       | 101         | 6         | 5.94%         | 196          | 5         | 2.55%         | 0.41 [0.15-1.15]     | 0.154    | 0.535   |
| ST18        | 101         | 12        | 11.88%        | 196          | 27        | 13.78%        | 1.18 [0.64-2.18]     | 0.647    | 0.928   |
| ST3GAL1     | 101         | 16        | 15.84%        | 196          | 54        | 27.55%        | 2.02 [1.20-3.40]     | 2.60E-02 | 0.507   |
| ST6GALNAC1  | 101         | 3         | 2.97%         | 196          | 15        | 7.65%         | 2.71 [0.94-7.82]     | 0.122    | 0.534   |
| ST6GALNAC2  | 101         | 3         | 2.97%         | 196          | 15        | 7.65%         | 2.71 [0.94-7.82]     | 0.122    | 0.534   |
| ST8SIA2     | 101         | 0         | 0.00%         | 196          | 7         | 3.57%         | 3.2e+07 [0e+00-Inf]  | 0.992    | 1.000   |
| STAC2       | 101         | 5         | 4.95%         | 196          | 12        | 6.12%         | 1.25 [0.51-3.08]     | 0.681    | 0.943   |
| STARD10     | 101         | 5         | 4.95%         | 196          | 10        | 5.10%         | 1.03 [0.41-2.60]     | 0.955    | 1.000   |
| STARD3      | 101         | 6         | 5.94%         | 196          | 12        | 6.12%         | 1.03 [0.44-2.41]     | 0.950    | 1.000   |
| STARD6      | 101         | 2         | 1.98%         | 196          | 3         | 1.53%         | 0.77 [0.17-3.50]     | 0.776    | 0.996   |
| STAR        | 101         | 11        | 10.89%        | 196          | 46        | 23.47%        | 2.51 [1.39-4.54]     | 1.09E-02 | 0.507   |
| STAU1       | 101         | 6         | 5.94%         | 196          | 7         | 3.57%         | 0.59 [0.23-1.50]     | 0.349    | 0.722   |
| STAU2       | 101         | 15        | 14.85%        | 196          | 40        | 20.41%        | 1.47 [0.85-2.53]     | 0.245    | 0.616   |
| STBD1       | 101         | 1         | 0.99%         | 196          | 6         | 3.06%         | 3.16 [0.53-18.88]    | 0.290    | 0.650   |
| STC2        | 101         | 2         | 1.98%         | 196          | 4         | 2.04%         | 1.03 [0.24-4.35]     | 0.972    | 1.000   |
| STK31       | 101         | 0         | 0.00%         | 196          | 6         | 3.06%         | 2.7e+07 [0e+00-Inf]  | 0.992    | 1.000   |
| STK3        | 101         | 16        | 15.84%        | 196          | 53        | 27.04%        | 1.97 [1.17-3.31]     | 3.23E-02 | 0.507   |
| STK4        | 101         | 5         | 4.95%         | 196          | 3         | 1.53%         | 0.30 [0.088-1.01]    | 0.103    | 0.507   |
| STMN2       | 101         | 17        | 16.83%        | 196          | 46        | 23.47%        | 1.52 [0.90-2.54]     | 0.187    | 0.551   |
| STMN3       | 101         | 7         | 6.93%         | 196          | 16        | 8.16%         | 1.19 [0.55-2.59]     | 0.707    | 0.962   |
| STRADA      | 101         | 8         | 7.92%         | 196          | 30        | 15.31%        | 2.10 [1.06-4.18]     | 0.076    | 0.507   |
| STRN3       | 101         | 1         | 0.99%         | 196          | 8         | 4.08%         | 4.26 [0.73-24.65]    | 0.175    | 0.535   |
| STUB1       | 101         | 6         | 5.94%         | 196          | 4         | 2.04%         | 0.33 [0.11-0.97]     | 0.092    | 0.507   |
| STX16       | 101         | 8         | 7.92%         | 196          | 16        | 8.16%         | 1.03 [0.49-2.17]     | 0.942    | 1.000   |
| STX1B       | 101         | 4         | 3.96%         | 196          | 6         | 3.06%         | 0.77 [0.26-2.26]     | 0.685    | 0.943   |
| STX4        | 101         | 4         | 3.96%         | 196          | 6         | 3.06%         | 0.77 [0.26-2.26]     | 0.685    | 0.943   |
| STX6        | 101         | 5         | 4.95%         | 196          | 19        | 9.69%         | 2.06 [0.88-4.83]     | 0.163    | 0.535   |
| STXBP4      | 101         | 8         | 7.92%         | 196          | 18        | 9.18%         | 1.18 [0.57-2.44]     | 0.715    | 0.972   |
| SULF1       | 101         | 16        | 15.84%        | 196          | 40        | 20.41%        | 1.36 [0.80-2.33]     | 0.342    | 0.716   |
| SULF2       | 101         | 5         | 4.95%         | 196          | 8         | 4.08%         | 0.82 [0.31-2.13]     | 0.729    | 0.986   |
| SULT1A1     | 101         | 5         | 4.95%         | 196          | 3         | 1.53%         | 0.30 [0.088-1.01]    | 0.103    | 0.507   |
| SULT1A2     | 101         | 5         | 4.95%         | 196          | 3         | 1.53%         | 0.30 [0.088-1.01]    | 0.103    | 0.507   |
| SULT1A3     | 101         | 4         | 3.96%         | 196          | 3         | 1.53%         | 0.38 [0.11-1.35]     | 0.207    | 0.573   |
| SUMO1P1     | 101         | 12        | 11.88%        | 196          | 25        | 12.76%        | 1.08 [0.59-2.01]     | 0.829    | 1.000   |
| SUMO1P3     | 101         | 6         | 5.94%         | 196          | 13        | 6.63%         | 1.12 [0.49-2.60]     | 0.817    | 1.000   |
| SUMO2       | 101         | 5         | 4.95%         | 196          | 13        | 6.63%         | 1.36 [0.56-3.32]     | 0.566    | 0.852   |
| SUPT4H1     | 101         | 6         | 5.94%         | 196          | 29        | 14.80%        | 2.75 [1.28-5.92]     | 3.02E-02 | 0.507   |
| SUPT6H      | 101         | 3         | 2.97%         | 196          | 8         | 4.08%         | 1.39 [0.45-4.31]     | 0.632    | 0.909   |
| SUSD4       | 101         | 6         | 5.94%         | 196          | 19        | 9.69%         | 1.70 [0.77-3.78]     | 0.274    | 0.643   |
| SV2A        | 101         | 6         | 5.94%         | 196          | 14        | 7.14%         | 1.22 [0.53-2.79]     | 0.696    | 0.951   |
| SV2B        | 101         | 0         | 0.00%         | 196          | 5         | 2.55%         | 2.2e+07 [0e+00-Inf]  | 0.992    | 1.000   |
| SVIP        | 101         | 3         | 2.97%         | 196          | 2         | 1.02%         | 0.34 [0.074-1.53]    | 0.237    | 0.599   |
| SYBU        | 101         | 16        | 15.84%        | 196          | 54        | 27.55%        | 2.02 [1.20-3.40]     | 2.60E-02 | 0.507   |
| SYCP2       | 101         | 9         | 8.91%         | 196          | 13        | 6.63%         | 0.73 [0.35-1.53]     | 0.479    | 0.805   |
| SYNGR2      | 101         | 3         | 2.97%         | 196          | 17        | 8.67%         | 3.10 [1.09-8.87]     | 0.076    | 0.507   |
| SYNGR3      | 101         | 6         | 5.94%         | 196          | 5         | 2.55%         | 0.41 [0.15-1.15]     | 0.154    | 0.535   |
| SYNM        | 101         | 1         | 0.99%         | 196          | 9         | 4.59%         | 4.81 [0.84-27.58]    | 0.139    | 0.535   |
| SYNPO2L     | 101         | 0         | 0.00%         | 196          | 5         | 2.55%         | 2.2e+07 [0e+00-Inf]  | 0.992    | 1.000   |
| SYNRG       | 101         | 2         | 1.98%         | 196          | 6         | 3.06%         | 1.56 [0.40-6.08]     | 0.589    | 0.869   |
| SYS1-DBNDD1 | 101         | 5         | 4.95%         | 196          | 3         | 1.53%         | 0.30 [0.088-1.01]    | 0.103    | 0.507   |
| SYS1        | 101         | 5         | 4.95%         | 196          | 3         | 1.53%         | 0.30 [0.088-1.01]    | 0.103    | 0.507   |
| SYT11       | 101         | 7         | 6.93%         | 196          | 9         | 4.59%         | 0.65 [0.27-1.52]     | 0.401    | 0.774   |
| SYT12       | 101         | 8         | 7.92%         | 196          | 12        | 6.12%         | 0.76 [0.35-1.65]     | 0.559    | 0.852   |
| SYT14       | 101         | 6         | 5.94%         | 196          | 22        | 11.22%        | 2.00 [0.91-4.39]     | 0.146    | 0.535   |
| SYT17       | 101         | 5         | 4.95%         | 196          | 4         | 2.04%         | 0.40 [0.13-1.23]     | 0.179    | 0.535   |
| SYT2        | 101         | 7         | 6.93%         | 196          | 28        | 14.29%        | 2.24 [1.08-4.63]     | 0.068    | 0.507   |
| SYT7        | 101         | 1         | 0.99%         | 196          | 5         | 2.55%         | 2.62 [0.43-16.05]    | 0.383    | 0.750   |
| SYTL2       | 101         | 2         | 1.98%         | 196          | 3         | 1.53%         | 0.77 [0.17-3.50]     | 0.776    | 0.996   |
| TAC4        | 101         | 4         | 3.96%         | 196          | 16        | 8.16%         | 2.16 [0.84-5.53]     | 0.180    | 0.535   |
| TACC1       | 101         | 12        | 11.88%        | 196          | 42        | 21.43%        | 2.02 [1.13-3.62]     | 4.62E-02 | 0.507   |
| TACO1       | 101         | 8         | 7.92%         | 196          | 30        | 15.31%        | 2.10 [1.06-4.18]     | 0.076    | 0.507   |
| TADA1       | 101         | 5         | 4.95%         | 196          | 13        | 6.63%         | 1.36 [0.56-3.32]     | 0.566    | 0.852   |
| TADA2A      | 101         | 2         | 1.98%         | 196          | 6         | 3.06%         | 1.56 [0.40-6.08]     | 0.589    | 0.869   |
| TAF15       | 101         | 2         | 1.98%         | 196          | 4         | 2.04%         | 1.03 [0.24-4.35]     | 0.972    | 1.000   |
| TAF1A       | 101         | 6         | 5.94%         | 196          | 18        | 9.18%         | 1.60 [0.72-3.57]     | 0.335    | 0.716   |
| TAF2        | 101         | 15        | 14.85%        | 196          | 56        | 28.57%        | 2.29 [1.35-3.89]     | 9.81E-03 | 0.507   |
| TAF4        | 101         | 6         | 5.94%         | 196          | 12        | 6.12%         | 1.03 [0.44-2.41]     | 0.950    | 1.000   |
| TAF5L       | 101         | 6         | 5.94%         | 196          | 19        | 9.69%         | 1.70 [0.77-3.78]     | 0.274    | 0.643   |
| TAGLN2      | 101         | 6         | 5.94%         | 196          | 11        | 5.61%         | 0.94 [0.40-2.23]     | 0.908    | 1.000   |
| TANC2       | 101         | 8         | 7.92%         | 196          | 31        | 15.82%        | 2.18 [1.10-4.34]     | 0.061    | 0.507   |
| TAOK1       | 101         | 3         | 2.97%         | 196          | 6         | 3.06%         | 1.03 [0.32-3.36]     | 0.965    | 1.000   |



| Symbol   | CINSARC Low |           |               | CINSARC High |           |               | CINSARC High vs. Low |          |         |
|----------|-------------|-----------|---------------|--------------|-----------|---------------|----------------------|----------|---------|
|          | N tested    | N altered | Fq alteration | N tested     | N altered | Fq alteration | OR [95%CI]           | p-value* | q-value |
| TAKO2    | 101         | 5         | 4.95%         | 196          | 4         | 2.04%         | 0.40 [0.13-1.23]     | 0.179    | 0.535   |
| TARBP1   | 101         | 7         | 6.93%         | 196          | 20        | 10.20%        | 1.53 [0.72-3.24]     | 0.355    | 0.722   |
| TARP     | 101         | 4         | 3.96%         | 196          | 7         | 3.57%         | 0.90 [0.31-2.57]     | 0.867    | 1.000   |
| TARS2    | 101         | 9         | 8.91%         | 196          | 16        | 8.16%         | 0.91 [0.44-1.86]     | 0.826    | 1.000   |
| TAS2R39  | 101         | 2         | 1.98%         | 196          | 4         | 2.04%         | 1.03 [0.24-4.35]     | 0.972    | 1.000   |
| TAS2R40  | 101         | 2         | 1.98%         | 196          | 3         | 1.53%         | 0.77 [0.17-3.50]     | 0.776    | 0.996   |
| TAS2R43  | 101         | 4         | 3.96%         | 196          | 3         | 1.53%         | 0.38 [0.11-1.35]     | 0.207    | 0.573   |
| TATDN1   | 101         | 16        | 15.84%        | 196          | 57        | 29.08%        | 2.18 [1.30-3.66]     | 1.33E-02 | 0.507   |
| TATDN3   | 101         | 6         | 5.94%         | 196          | 21        | 10.71%        | 1.90 [0.86-4.19]     | 0.181    | 0.535   |
| TAX1BP1  | 101         | 0         | 0.00%         | 196          | 7         | 3.57%         | 3.2e+07 [0e+00-Inf]  | 0.992    | 1.000   |
| TBC1D10B | 101         | 4         | 3.96%         | 196          | 5         | 2.55%         | 0.63 [0.21-1.95]     | 0.505    | 0.805   |
| TBC1D10C | 101         | 11        | 10.89%        | 196          | 18        | 9.18%         | 0.83 [0.43-1.61]     | 0.639    | 0.918   |
| TBC1D15  | 101         | 2         | 1.98%         | 196          | 11        | 5.61%         | 2.94 [0.82-10.59]    | 0.166    | 0.535   |
| TBC1D16  | 101         | 3         | 2.97%         | 196          | 17        | 8.67%         | 3.10 [1.09-8.87]     | 0.076    | 0.507   |
| TBC1D24  | 101         | 6         | 5.94%         | 196          | 5         | 2.55%         | 0.41 [0.15-1.15]     | 0.154    | 0.535   |
| TBC1D3B  | 101         | 3         | 2.97%         | 196          | 17        | 8.67%         | 3.10 [1.09-8.87]     | 0.076    | 0.507   |
| TBC1D3C  | 101         | 4         | 3.96%         | 196          | 8         | 4.08%         | 1.03 [0.37-2.88]     | 0.960    | 1.000   |
| TBC1D3G  | 101         | 2         | 1.98%         | 196          | 6         | 3.06%         | 1.56 [0.40-6.08]     | 0.589    | 0.869   |
| TBC1D3H  | 101         | 2         | 1.98%         | 196          | 6         | 3.06%         | 1.56 [0.40-6.08]     | 0.589    | 0.869   |
| TBC1D3P2 | 101         | 9         | 8.91%         | 196          | 34        | 17.35%        | 2.15 [1.12-4.12]     | 0.055    | 0.507   |
| TBC1D3   | 101         | 4         | 3.96%         | 196          | 8         | 4.08%         | 1.03 [0.37-2.88]     | 0.960    | 1.000   |
| TBC1D7   | 101         | 1         | 0.99%         | 196          | 4         | 2.04%         | 2.08 [0.33-13.25]    | 0.514    | 0.805   |
| TBCD     | 101         | 2         | 1.98%         | 196          | 15        | 7.65%         | 4.10 [1.17-14.39]    | 0.064    | 0.507   |
| TBCE     | 101         | 7         | 6.93%         | 196          | 20        | 10.20%        | 1.53 [0.72-3.24]     | 0.355    | 0.722   |
| TBK1     | 101         | 1         | 0.99%         | 196          | 4         | 2.04%         | 2.08 [0.33-13.25]    | 0.514    | 0.805   |
| TBKBP1   | 101         | 2         | 1.98%         | 196          | 9         | 4.59%         | 2.38 [0.65-8.76]     | 0.273    | 0.643   |
| TBL1XR1  | 101         | 3         | 2.97%         | 196          | 3         | 1.53%         | 0.51 [0.13-1.98]     | 0.412    | 0.774   |
| TBL1Y    | 101         | 0         | 0.00%         | 196          | 0         | 0.00%         | 1.00 [0e+00-Inf]     | 1.000    | 1.000   |
| TBL3     | 101         | 6         | 5.94%         | 196          | 5         | 2.55%         | 0.41 [0.15-1.15]     | 0.154    | 0.535   |
| TBX10    | 101         | 10        | 9.90%         | 196          | 19        | 9.69%         | 0.98 [0.50-1.92]     | 0.955    | 1.000   |
| TBX19    | 101         | 4         | 3.96%         | 196          | 13        | 6.63%         | 1.72 [0.66-4.51]     | 0.353    | 0.722   |
| TBX21    | 101         | 2         | 1.98%         | 196          | 9         | 4.59%         | 2.38 [0.65-8.76]     | 0.273    | 0.643   |
| TBX2     | 101         | 7         | 6.93%         | 196          | 32        | 16.33%        | 2.62 [1.28-5.38]     | 2.75E-02 | 0.507   |
| TBX4     | 101         | 7         | 6.93%         | 196          | 32        | 16.33%        | 2.62 [1.28-5.38]     | 2.75E-02 | 0.507   |
| TBX6     | 101         | 5         | 4.95%         | 196          | 4         | 2.04%         | 0.40 [0.13-1.23]     | 0.179    | 0.535   |
| TCAM1P   | 101         | 8         | 7.92%         | 196          | 29        | 14.80%        | 2.02 [1.01-4.03]     | 0.094    | 0.507   |
| TCAP     | 101         | 6         | 5.94%         | 196          | 12        | 6.12%         | 1.03 [0.44-2.41]     | 0.950    | 1.000   |
| TCEA1    | 101         | 12        | 11.88%        | 196          | 30        | 15.31%        | 1.34 [0.73-2.45]     | 0.423    | 0.787   |
| TCEA2    | 101         | 7         | 6.93%         | 196          | 11        | 5.61%         | 0.80 [0.35-1.82]     | 0.652    | 0.928   |
| TCFL5    | 101         | 7         | 6.93%         | 196          | 13        | 6.63%         | 0.95 [0.43-2.12]     | 0.923    | 1.000   |
| TCHHL1   | 101         | 7         | 6.93%         | 196          | 13        | 6.63%         | 0.95 [0.43-2.12]     | 0.923    | 1.000   |
| TCHH     | 101         | 7         | 6.93%         | 196          | 13        | 6.63%         | 0.95 [0.43-2.12]     | 0.923    | 1.000   |
| TCIRG1   | 101         | 9         | 8.91%         | 196          | 22        | 11.22%        | 1.29 [0.65-2.56]     | 0.538    | 0.835   |
| TCTEX1D2 | 101         | 4         | 3.96%         | 196          | 3         | 1.53%         | 0.38 [0.11-1.35]     | 0.207    | 0.573   |
| TDRD10   | 101         | 7         | 6.93%         | 196          | 12        | 6.12%         | 0.88 [0.39-1.97]     | 0.788    | 0.996   |
| TDRD5    | 101         | 6         | 5.94%         | 196          | 19        | 9.69%         | 1.70 [0.77-3.78]     | 0.274    | 0.643   |
| TDRKH    | 101         | 6         | 5.94%         | 196          | 12        | 6.12%         | 1.03 [0.44-2.41]     | 0.950    | 1.000   |
| TEDDM1   | 101         | 5         | 4.95%         | 196          | 19        | 9.69%         | 2.06 [0.88-4.83]     | 0.163    | 0.535   |
| TEKT5    | 101         | 5         | 4.95%         | 196          | 3         | 1.53%         | 0.30 [0.088-1.01]    | 0.103    | 0.507   |
| TELO2    | 101         | 7         | 6.93%         | 196          | 5         | 2.55%         | 0.35 [0.13-0.94]     | 0.081    | 0.507   |
| TERF1    | 101         | 16        | 15.84%        | 196          | 42        | 21.43%        | 1.45 [0.85-2.47]     | 0.252    | 0.623   |
| TEX14    | 101         | 8         | 7.92%         | 196          | 29        | 14.80%        | 2.02 [1.01-4.03]     | 0.094    | 0.507   |
| TEX15    | 101         | 2         | 1.98%         | 196          | 7         | 3.57%         | 1.83 [0.48-6.96]     | 0.455    | 0.805   |
| TEX19    | 101         | 2         | 1.98%         | 196          | 13        | 6.63%         | 3.52 [0.99-12.47]    | 0.102    | 0.507   |
| TEX2     | 101         | 7         | 6.93%         | 196          | 28        | 14.29%        | 2.24 [1.08-4.63]     | 0.068    | 0.507   |
| TFAP2C   | 101         | 7         | 6.93%         | 196          | 15        | 7.65%         | 1.11 [0.51-2.43]     | 0.822    | 1.000   |
| TFAP4    | 101         | 5         | 4.95%         | 196          | 6         | 3.06%         | 0.61 [0.22-1.68]     | 0.418    | 0.779   |
| TFB2M    | 101         | 5         | 4.95%         | 196          | 18        | 9.18%         | 1.94 [0.82-4.58]     | 0.203    | 0.570   |
| TFRC     | 101         | 4         | 3.96%         | 196          | 3         | 1.53%         | 0.38 [0.11-1.35]     | 0.207    | 0.573   |
| TGFB11I  | 101         | 4         | 3.96%         | 196          | 4         | 2.04%         | 0.51 [0.16-1.65]     | 0.342    | 0.716   |
| TGFB2    | 101         | 6         | 5.94%         | 196          | 19        | 9.69%         | 1.70 [0.77-3.78]     | 0.274    | 0.643   |
| TGIF2LY  | 101         | 0         | 0.00%         | 196          | 0         | 0.00%         | 1.00 [0e+00-Inf]     | 1.000    | 1.000   |
| TGIF2    | 101         | 4         | 3.96%         | 196          | 6         | 3.06%         | 0.77 [0.26-2.26]     | 0.685    | 0.943   |
| TGM2     | 101         | 4         | 3.96%         | 196          | 4         | 2.04%         | 0.51 [0.16-1.65]     | 0.342    | 0.716   |
| TGS1     | 101         | 14        | 13.86%        | 196          | 31        | 15.82%        | 1.17 [0.66-2.07]     | 0.656    | 0.931   |
| TG       | 101         | 15        | 14.85%        | 196          | 58        | 29.59%        | 2.41 [1.42-4.08]     | 6.08E-03 | 0.507   |
| NELFCD   | 101         | 9         | 8.91%         | 196          | 15        | 7.65%         | 0.85 [0.41-1.75]     | 0.707    | 0.962   |
| THAP1    | 101         | 13        | 12.87%        | 196          | 27        | 13.78%        | 1.08 [0.60-1.96]     | 0.829    | 1.000   |
| THAP2    | 101         | 1         | 0.99%         | 196          | 12        | 6.12%         | 6.52 [1.16-36.57]    | 0.074    | 0.507   |
| THAP6    | 101         | 1         | 0.99%         | 196          | 5         | 2.55%         | 2.62 [0.43-16.05]    | 0.383    | 0.750   |
| THBS3    | 101         | 7         | 6.93%         | 196          | 13        | 6.63%         | 0.95 [0.43-2.12]     | 0.923    | 1.000   |

| Symbol     | CINSARC Low |           |               | CINSARC High |           |               | CINSARC High vs. Low |          |         |
|------------|-------------|-----------|---------------|--------------|-----------|---------------|----------------------|----------|---------|
|            | N tested    | N altered | Fq alteration | N tested     | N altered | Fq alteration | OR [95%CI]           | p-value* | q-value |
| THEM4      | 101         | 6         | 5.94%         | 196          | 13        | 6.63%         | 1.12 [0.49-2.60]     | 0.817    | 1.000   |
| THEM5      | 101         | 6         | 5.94%         | 196          | 12        | 6.12%         | 1.03 [0.44-2.41]     | 0.950    | 1.000   |
| THOC3      | 101         | 3         | 2.97%         | 196          | 8         | 4.08%         | 1.39 [0.45-4.31]     | 0.632    | 0.909   |
| ALYREF     | 101         | 2         | 1.98%         | 196          | 13        | 6.63%         | 3.52 [0.99-12.47]    | 0.102    | 0.507   |
| THOC6      | 101         | 6         | 5.94%         | 196          | 4         | 2.04%         | 0.33 [0.11-0.97]     | 0.092    | 0.507   |
| THPO       | 101         | 3         | 2.97%         | 196          | 2         | 1.02%         | 0.34 [0.074-1.53]    | 0.237    | 0.599   |
| THRA       | 101         | 5         | 4.95%         | 196          | 9         | 4.59%         | 0.92 [0.36-2.37]     | 0.890    | 1.000   |
| THRSP      | 101         | 9         | 8.91%         | 196          | 20        | 10.20%        | 1.16 [0.58-2.32]     | 0.722    | 0.980   |
| THUMPD1    | 101         | 5         | 4.95%         | 196          | 2         | 1.02%         | 0.20 [0.049-0.80]    | 0.056    | 0.507   |
| TIAF1      | 101         | 3         | 2.97%         | 196          | 5         | 2.55%         | 0.86 [0.25-2.89]     | 0.833    | 1.000   |
| TIGD5      | 101         | 16        | 15.84%        | 196          | 51        | 26.02%        | 1.87 [1.11-3.15]     | 4.89E-02 | 0.507   |
| TIGD7      | 101         | 5         | 4.95%         | 196          | 4         | 2.04%         | 0.40 [0.13-1.23]     | 0.179    | 0.535   |
| PAM16      | 101         | 5         | 4.95%         | 196          | 6         | 3.06%         | 0.61 [0.22-1.68]     | 0.418    | 0.779   |
| TIMM17A    | 101         | 7         | 6.93%         | 196          | 24        | 12.24%        | 1.87 [0.90-3.92]     | 0.161    | 0.535   |
| TIMP2      | 101         | 3         | 2.97%         | 196          | 13        | 6.63%         | 2.32 [0.79-6.79]     | 0.197    | 0.570   |
| TIPRL      | 101         | 4         | 3.96%         | 196          | 13        | 6.63%         | 1.72 [0.66-4.51]     | 0.353    | 0.722   |
| TK1        | 101         | 3         | 2.97%         | 196          | 17        | 8.67%         | 3.10 [1.09-8.87]     | 0.076    | 0.507   |
| TLCD1      | 101         | 3         | 2.97%         | 196          | 8         | 4.08%         | 1.39 [0.45-4.31]     | 0.632    | 0.909   |
| TLK2       | 101         | 8         | 7.92%         | 196          | 34        | 17.35%        | 2.44 [1.23-4.82]     | 3.12E-02 | 0.507   |
| TLR5       | 101         | 6         | 5.94%         | 196          | 19        | 9.69%         | 1.70 [0.77-3.78]     | 0.274    | 0.643   |
| TM2D2      | 101         | 12        | 11.88%        | 196          | 39        | 19.90%        | 1.84 [1.03-3.31]     | 0.086    | 0.507   |
| TM4SF19    | 101         | 4         | 3.96%         | 196          | 3         | 1.53%         | 0.38 [0.11-1.35]     | 0.207    | 0.573   |
| DCSTAMP    | 101         | 17        | 16.83%        | 196          | 50        | 25.51%        | 1.69 [1.01-2.83]     | 0.092    | 0.507   |
| TMBIM4     | 101         | 2         | 1.98%         | 196          | 8         | 4.08%         | 2.11 [0.56-7.86]     | 0.352    | 0.722   |
| TMC3       | 101         | 1         | 0.99%         | 196          | 4         | 2.04%         | 2.08 [0.33-13.25]    | 0.514    | 0.805   |
| TMC5       | 101         | 5         | 4.95%         | 196          | 4         | 2.04%         | 0.40 [0.13-1.23]     | 0.179    | 0.535   |
| TMC6       | 101         | 3         | 2.97%         | 196          | 16        | 8.16%         | 2.90 [1.01-8.34]     | 0.097    | 0.507   |
| TMC7       | 101         | 5         | 4.95%         | 196          | 4         | 2.04%         | 0.40 [0.13-1.23]     | 0.179    | 0.535   |
| TMC8       | 101         | 3         | 2.97%         | 196          | 16        | 8.16%         | 2.90 [1.01-8.34]     | 0.097    | 0.507   |
| TMCC2      | 101         | 7         | 6.93%         | 196          | 26        | 13.27%        | 2.05 [0.99-4.27]     | 0.106    | 0.507   |
| TMCO1      | 101         | 4         | 3.96%         | 196          | 12        | 6.12%         | 1.58 [0.60-4.18]     | 0.438    | 0.798   |
| TMED10P1   | 101         | 16        | 15.84%        | 196          | 47        | 23.98%        | 1.68 [0.99-2.84]     | 0.106    | 0.507   |
| TMEM100    | 101         | 8         | 7.92%         | 196          | 20        | 10.20%        | 1.32 [0.64-2.71]     | 0.525    | 0.818   |
| TMEM104    | 101         | 5         | 4.95%         | 196          | 13        | 6.63%         | 1.36 [0.56-3.32]     | 0.566    | 0.852   |
| TMEM105    | 101         | 2         | 1.98%         | 196          | 12        | 6.12%         | 3.23 [0.90-11.53]    | 0.130    | 0.535   |
| TMEM114    | 101         | 5         | 4.95%         | 196          | 5         | 2.55%         | 0.50 [0.17-1.45]     | 0.286    | 0.650   |
| TMEM126A   | 101         | 3         | 2.97%         | 196          | 3         | 1.53%         | 0.51 [0.13-1.98]     | 0.412    | 0.774   |
| TMEM126B   | 101         | 3         | 2.97%         | 196          | 3         | 1.53%         | 0.51 [0.13-1.98]     | 0.412    | 0.774   |
| TMEM134    | 101         | 11        | 10.89%        | 196          | 20        | 10.20%        | 0.93 [0.48-1.79]     | 0.854    | 1.000   |
| TMEM135    | 101         | 2         | 1.98%         | 196          | 5         | 2.55%         | 1.30 [0.32-5.21]     | 0.759    | 0.996   |
| TMEM138    | 101         | 1         | 0.99%         | 196          | 4         | 2.04%         | 2.08 [0.33-13.25]    | 0.514    | 0.805   |
| TMEM150B   | 101         | 1         | 0.99%         | 196          | 4         | 2.04%         | 2.08 [0.33-13.25]    | 0.514    | 0.805   |
| TMEM151A   | 101         | 2         | 1.98%         | 196          | 6         | 3.06%         | 1.56 [0.40-6.08]     | 0.589    | 0.869   |
| TMEM159    | 101         | 5         | 4.95%         | 196          | 2         | 1.02%         | 0.20 [0.049-0.80]    | 0.056    | 0.507   |
| TMEM183A   | 101         | 7         | 6.93%         | 196          | 27        | 13.78%        | 2.15 [1.03-4.45]     | 0.085    | 0.507   |
| TMEM186    | 101         | 5         | 4.95%         | 196          | 4         | 2.04%         | 0.40 [0.13-1.23]     | 0.179    | 0.535   |
| TMEM189-UB | 101         | 6         | 5.94%         | 196          | 14        | 7.14%         | 1.22 [0.53-2.79]     | 0.696    | 0.951   |
| TMEM189    | 101         | 6         | 5.94%         | 196          | 14        | 7.14%         | 1.22 [0.53-2.79]     | 0.696    | 0.951   |
| TMEM190    | 101         | 1         | 0.99%         | 196          | 4         | 2.04%         | 2.08 [0.33-13.25]    | 0.514    | 0.805   |
| TMEM199    | 101         | 3         | 2.97%         | 196          | 7         | 3.57%         | 1.21 [0.38-3.83]     | 0.786    | 0.996   |
| TMEM19     | 101         | 1         | 0.99%         | 196          | 12        | 6.12%         | 6.52 [1.16-36.57]    | 0.074    | 0.507   |
| TMEM202    | 101         | 1         | 0.99%         | 196          | 4         | 2.04%         | 2.08 [0.33-13.25]    | 0.514    | 0.805   |
| TMEM204    | 101         | 6         | 5.94%         | 196          | 5         | 2.55%         | 0.41 [0.15-1.15]     | 0.154    | 0.535   |
| TMEM206    | 101         | 7         | 6.93%         | 196          | 21        | 10.71%        | 1.61 [0.76-3.40]     | 0.294    | 0.650   |
| TMEM207    | 101         | 2         | 1.98%         | 196          | 3         | 1.53%         | 0.77 [0.17-3.50]     | 0.776    | 0.996   |
| TMEM216    | 101         | 1         | 0.99%         | 196          | 4         | 2.04%         | 2.08 [0.33-13.25]    | 0.514    | 0.805   |
| TMEM219    | 101         | 5         | 4.95%         | 196          | 4         | 2.04%         | 0.40 [0.13-1.23]     | 0.179    | 0.535   |
| TMEM41A    | 101         | 3         | 2.97%         | 196          | 2         | 1.02%         | 0.34 [0.074-1.53]    | 0.237    | 0.599   |
| TMEM44     | 101         | 3         | 2.97%         | 196          | 3         | 1.53%         | 0.51 [0.13-1.98]     | 0.412    | 0.774   |
| VMP1       | 101         | 9         | 8.91%         | 196          | 34        | 17.35%        | 2.15 [1.12-4.12]     | 0.055    | 0.507   |
| TMEM63A    | 101         | 6         | 5.94%         | 196          | 20        | 10.20%        | 1.80 [0.81-3.98]     | 0.224    | 0.596   |
| TMEM64     | 101         | 18        | 17.82%        | 196          | 47        | 23.98%        | 1.45 [0.87-2.42]     | 0.226    | 0.598   |
| TMEM65     | 101         | 16        | 15.84%        | 196          | 57        | 29.08%        | 2.18 [1.30-3.66]     | 1.33E-02 | 0.507   |
| TMEM67     | 101         | 17        | 16.83%        | 196          | 54        | 27.55%        | 1.88 [1.13-3.13]     | 4.21E-02 | 0.507   |
| TMEM68     | 101         | 14        | 13.86%        | 196          | 30        | 15.31%        | 1.12 [0.63-2.00]     | 0.740    | 0.996   |
| TMEM70     | 101         | 17        | 16.83%        | 196          | 41        | 20.92%        | 1.31 [0.77-2.21]     | 0.401    | 0.774   |
| TMEM71     | 101         | 15        | 14.85%        | 196          | 58        | 29.59%        | 2.41 [1.42-4.08]     | 6.08E-03 | 0.507   |
| TMEM74     | 101         | 15        | 14.85%        | 196          | 51        | 26.02%        | 2.02 [1.18-3.43]     | 3.03E-02 | 0.507   |
| TMEM79     | 101         | 6         | 5.94%         | 196          | 9         | 4.59%         | 0.76 [0.31-1.86]     | 0.616    | 0.898   |
| TMEM81     | 101         | 7         | 6.93%         | 196          | 26        | 13.27%        | 2.05 [0.99-4.27]     | 0.106    | 0.507   |
| TMEM86A    | 101         | 1         | 0.99%         | 196          | 4         | 2.04%         | 2.08 [0.33-13.25]    | 0.514    | 0.805   |

| Symbol    | CINSARC Low |           |               | CINSARC High |           |               | CINSARC High vs. Low |          |         |
|-----------|-------------|-----------|---------------|--------------|-----------|---------------|----------------------|----------|---------|
|           | N tested    | N altered | Fq alteration | N tested     | N altered | Fq alteration | OR [95%CI]           | p-value* | q-value |
| TMEM8A    | 101         | 7         | 6.93%         | 196          | 4         | 2.04%         | 0.28 [0.098-0.80]    | 4.63E-02 | 0.507   |
| TMEM92    | 101         | 4         | 3.96%         | 196          | 18        | 9.18%         | 2.45 [0.97-6.23]     | 0.114    | 0.512   |
| TMEM97    | 101         | 4         | 3.96%         | 196          | 7         | 3.57%         | 0.90 [0.31-2.57]     | 0.867    | 1.000   |
| TMEM98    | 101         | 2         | 1.98%         | 196          | 4         | 2.04%         | 1.03 [0.24-4.35]     | 0.972    | 1.000   |
| TMEM99    | 101         | 2         | 1.98%         | 196          | 4         | 2.04%         | 1.03 [0.24-4.35]     | 0.972    | 1.000   |
| TMEM9     | 101         | 6         | 5.94%         | 196          | 24        | 12.24%        | 2.21 [1.01-4.82]     | 0.095    | 0.507   |
| TMIGD1    | 101         | 2         | 1.98%         | 196          | 5         | 2.55%         | 1.30 [0.32-5.21]     | 0.759    | 0.996   |
| TMOD4     | 101         | 7         | 6.93%         | 196          | 13        | 6.63%         | 0.95 [0.43-2.12]     | 0.923    | 1.000   |
| TMSB4Y    | 101         | 0         | 0.00%         | 196          | 0         | 0.00%         | 1.00 [0e+00-Inf]     | 1.000    | 1.000   |
| TMTC3     | 101         | 0         | 0.00%         | 196          | 5         | 2.55%         | 2.2e+07 [0e+00-Inf]  | 0.992    | 1.000   |
| TNFAIP1   | 101         | 3         | 2.97%         | 196          | 7         | 3.57%         | 1.21 [0.38-3.83]     | 0.786    | 0.996   |
| TNFAIP8L2 | 101         | 7         | 6.93%         | 196          | 13        | 6.63%         | 0.95 [0.43-2.12]     | 0.923    | 1.000   |
| TNFRSF11A | 101         | 3         | 2.97%         | 196          | 2         | 1.02%         | 0.34 [0.074-1.53]    | 0.237    | 0.599   |
| TNFRSF11B | 101         | 15        | 14.85%        | 196          | 57        | 29.08%        | 2.35 [1.39-3.99]     | 7.74E-03 | 0.507   |
| TNFRSF12A | 101         | 6         | 5.94%         | 196          | 4         | 2.04%         | 0.33 [0.11-0.97]     | 0.092    | 0.507   |
| TNFRSF17  | 101         | 5         | 4.95%         | 196          | 3         | 1.53%         | 0.30 [0.088-1.01]    | 0.103    | 0.507   |
| TNFRSF6B  | 101         | 7         | 6.93%         | 196          | 15        | 7.65%         | 1.11 [0.51-2.43]     | 0.822    | 1.000   |
| TNFSF18   | 101         | 5         | 4.95%         | 196          | 15        | 7.65%         | 1.59 [0.66-3.81]     | 0.382    | 0.750   |
| TNFSF4    | 101         | 5         | 4.95%         | 196          | 13        | 6.63%         | 1.36 [0.56-3.32]     | 0.566    | 0.852   |
| TNK2      | 101         | 4         | 3.96%         | 196          | 3         | 1.53%         | 0.38 [0.11-1.35]     | 0.207    | 0.573   |
| TNNC2     | 101         | 5         | 4.95%         | 196          | 4         | 2.04%         | 0.40 [0.13-1.23]     | 0.179    | 0.535   |
| TNNI1     | 101         | 7         | 6.93%         | 196          | 25        | 12.76%        | 1.96 [0.94-4.09]     | 0.131    | 0.535   |
| TNNT2     | 101         | 6         | 5.94%         | 196          | 24        | 12.24%        | 2.21 [1.01-4.82]     | 0.095    | 0.507   |
| TNN       | 101         | 5         | 4.95%         | 196          | 16        | 8.16%         | 1.71 [0.72-4.07]     | 0.311    | 0.680   |
| TNP2      | 101         | 5         | 4.95%         | 196          | 4         | 2.04%         | 0.40 [0.13-1.23]     | 0.179    | 0.535   |
| TNRC6A    | 101         | 5         | 4.95%         | 196          | 3         | 1.53%         | 0.30 [0.088-1.01]    | 0.103    | 0.507   |
| TNRC6C    | 101         | 3         | 2.97%         | 196          | 16        | 8.16%         | 2.90 [1.01-8.34]     | 0.097    | 0.507   |
| TNR       | 101         | 5         | 4.95%         | 196          | 17        | 8.67%         | 1.82 [0.77-4.32]     | 0.252    | 0.623   |
| TNS4      | 101         | 4         | 3.96%         | 196          | 5         | 2.55%         | 0.63 [0.21-1.95]     | 0.505    | 0.805   |
| TOB1      | 101         | 4         | 3.96%         | 196          | 20        | 10.20%        | 2.76 [1.09-6.95]     | 0.071    | 0.507   |
| TOM1L1    | 101         | 7         | 6.93%         | 196          | 16        | 8.16%         | 1.19 [0.55-2.59]     | 0.707    | 0.962   |
| TOMM20    | 101         | 7         | 6.93%         | 196          | 19        | 9.69%         | 1.44 [0.68-3.07]     | 0.427    | 0.791   |
| TOMM34    | 101         | 4         | 3.96%         | 196          | 4         | 2.04%         | 0.51 [0.16-1.65]     | 0.342    | 0.716   |
| TOMM40L   | 101         | 6         | 5.94%         | 196          | 16        | 8.16%         | 1.41 [0.62-3.18]     | 0.490    | 0.805   |
| TOMM7     | 101         | 0         | 0.00%         | 196          | 6         | 3.06%         | 2.7e+07 [0e+00-Inf]  | 0.992    | 1.000   |
| TOP1MT    | 101         | 17        | 16.83%        | 196          | 51        | 26.02%        | 1.74 [1.04-2.90]     | 0.076    | 0.507   |
| TOP1P1    | 101         | 5         | 4.95%         | 196          | 13        | 6.63%         | 1.36 [0.56-3.32]     | 0.566    | 0.852   |
| TOP1      | 101         | 3         | 2.97%         | 196          | 7         | 3.57%         | 1.21 [0.38-3.83]     | 0.786    | 0.996   |
| TOP2A     | 101         | 4         | 3.96%         | 196          | 6         | 3.06%         | 0.77 [0.26-2.26]     | 0.685    | 0.943   |
| TOR1AIP1  | 101         | 6         | 5.94%         | 196          | 19        | 9.69%         | 1.70 [0.77-3.78]     | 0.274    | 0.643   |
| TOR1AIP2  | 101         | 6         | 5.94%         | 196          | 19        | 9.69%         | 1.70 [0.77-3.78]     | 0.274    | 0.643   |
| TOR3A     | 101         | 5         | 4.95%         | 196          | 18        | 9.18%         | 1.94 [0.82-4.58]     | 0.203    | 0.570   |
| TOX2      | 101         | 3         | 2.97%         | 196          | 4         | 2.04%         | 0.68 [0.19-2.43]     | 0.619    | 0.898   |
| TOX       | 101         | 15        | 14.85%        | 196          | 33        | 16.84%        | 1.16 [0.66-2.03]     | 0.660    | 0.935   |
| TP53BP2   | 101         | 6         | 5.94%         | 196          | 18        | 9.18%         | 1.60 [0.72-3.57]     | 0.335    | 0.716   |
| TP53I13   | 101         | 3         | 2.97%         | 196          | 5         | 2.55%         | 0.86 [0.25-2.89]     | 0.833    | 1.000   |
| TP53INP1  | 101         | 16        | 15.84%        | 196          | 53        | 27.04%        | 1.97 [1.17-3.31]     | 3.23E-02 | 0.507   |
| TP53INP2  | 101         | 4         | 3.96%         | 196          | 6         | 3.06%         | 0.77 [0.26-2.26]     | 0.685    | 0.943   |
| TP53RK    | 101         | 4         | 3.96%         | 196          | 7         | 3.57%         | 0.90 [0.31-2.57]     | 0.867    | 1.000   |
| TP53TG3B  | 101         | 5         | 4.95%         | 196          | 4         | 2.04%         | 0.40 [0.13-1.23]     | 0.179    | 0.535   |
| TP53TG5   | 101         | 5         | 4.95%         | 196          | 3         | 1.53%         | 0.30 [0.088-1.01]    | 0.103    | 0.507   |
| TP63      | 101         | 2         | 1.98%         | 196          | 3         | 1.53%         | 0.77 [0.17-3.50]     | 0.776    | 0.996   |
| TPCN2     | 101         | 16        | 15.84%        | 196          | 46        | 23.47%        | 1.63 [0.96-2.76]     | 0.128    | 0.535   |
| TPD52L2   | 101         | 6         | 5.94%         | 196          | 12        | 6.12%         | 1.03 [0.44-2.41]     | 0.950    | 1.000   |
| TPD52     | 101         | 17        | 16.83%        | 196          | 48        | 24.49%        | 1.60 [0.96-2.68]     | 0.133    | 0.535   |
| TPH1      | 101         | 1         | 0.99%         | 196          | 4         | 2.04%         | 2.08 [0.33-13.25]    | 0.514    | 0.805   |
| TPH2      | 101         | 2         | 1.98%         | 196          | 11        | 5.61%         | 2.94 [0.82-10.59]    | 0.166    | 0.535   |
| TPM3      | 101         | 7         | 6.93%         | 196          | 12        | 6.12%         | 0.88 [0.39-1.97]     | 0.788    | 0.996   |
| TPRG1     | 101         | 2         | 1.98%         | 196          | 3         | 1.53%         | 0.77 [0.17-3.50]     | 0.776    | 0.996   |
| TPR       | 101         | 5         | 4.95%         | 196          | 16        | 8.16%         | 1.71 [0.72-4.07]     | 0.311    | 0.680   |
| TPSAB1    | 101         | 6         | 5.94%         | 196          | 5         | 2.55%         | 0.41 [0.15-1.15]     | 0.154    | 0.535   |
| TPSB2     | 101         | 6         | 5.94%         | 196          | 5         | 2.55%         | 0.41 [0.15-1.15]     | 0.154    | 0.535   |
| TPSD1     | 101         | 6         | 5.94%         | 196          | 5         | 2.55%         | 0.41 [0.15-1.15]     | 0.154    | 0.535   |
| TPSG1     | 101         | 6         | 5.94%         | 196          | 5         | 2.55%         | 0.41 [0.15-1.15]     | 0.154    | 0.535   |
| TRA2A     | 101         | 0         | 0.00%         | 196          | 6         | 3.06%         | 2.7e+07 [0e+00-Inf]  | 0.992    | 1.000   |
| TRAF3IP3  | 101         | 6         | 5.94%         | 196          | 22        | 11.22%        | 2.00 [0.91-4.39]     | 0.146    | 0.535   |
| TRAF4     | 101         | 3         | 2.97%         | 196          | 9         | 4.59%         | 1.57 [0.52-4.80]     | 0.505    | 0.805   |
| TRAF5     | 101         | 7         | 6.93%         | 196          | 20        | 10.20%        | 1.53 [0.72-3.24]     | 0.355    | 0.722   |
| TRAF7     | 101         | 6         | 5.94%         | 196          | 5         | 2.55%         | 0.41 [0.15-1.15]     | 0.154    | 0.535   |
| TRAM1     | 101         | 16        | 15.84%        | 196          | 40        | 20.41%        | 1.36 [0.80-2.33]     | 0.342    | 0.716   |
| TRAP1     | 101         | 5         | 4.95%         | 196          | 4         | 2.04%         | 0.40 [0.13-1.23]     | 0.179    | 0.535   |

| Symbol      | CINSARC Low |           |               | CINSARC High |           |               | CINSARC High vs. Low |          |         |
|-------------|-------------|-----------|---------------|--------------|-----------|---------------|----------------------|----------|---------|
|             | N tested    | N altered | Fq alteration | N tested     | N altered | Fq alteration | OR [95%CI]           | p-value* | q-value |
| TRAPPC9     | 101         | 17        | 16.83%        | 196          | 50        | 25.51%        | 1.69 [1.01-2.83]     | 0.092    | 0.507   |
| TRHDE       | 101         | 2         | 1.98%         | 196          | 11        | 5.61%         | 2.94 [0.82-10.59]    | 0.166    | 0.535   |
| TRHR        | 101         | 15        | 14.85%        | 196          | 52        | 26.53%        | 2.07 [1.22-3.52]     | 2.44E-02 | 0.507   |
| TRIB1       | 101         | 16        | 15.84%        | 196          | 58        | 29.59%        | 2.23 [1.33-3.74]     | 1.06E-02 | 0.507   |
| TRIL        | 101         | 0         | 0.00%         | 196          | 8         | 4.08%         | 3.6e+07 [0e+00-Inf]  | 0.992    | 1.000   |
| TRIM11      | 101         | 7         | 6.93%         | 196          | 21        | 10.71%        | 1.61 [0.76-3.40]     | 0.294    | 0.650   |
| TRIM17      | 101         | 7         | 6.93%         | 196          | 21        | 10.71%        | 1.61 [0.76-3.40]     | 0.294    | 0.650   |
| TRIM25      | 101         | 7         | 6.93%         | 196          | 22        | 11.22%        | 1.70 [0.81-3.57]     | 0.242    | 0.610   |
| TRIM37      | 101         | 8         | 7.92%         | 196          | 29        | 14.80%        | 2.02 [1.01-4.03]     | 0.094    | 0.507   |
| TRIM46      | 101         | 7         | 6.93%         | 196          | 13        | 6.63%         | 0.95 [0.43-2.12]     | 0.923    | 1.000   |
| TRIM47      | 101         | 4         | 3.96%         | 196          | 12        | 6.12%         | 1.58 [0.60-4.18]     | 0.438    | 0.798   |
| TRIM55      | 101         | 15        | 14.85%        | 196          | 37        | 18.88%        | 1.33 [0.77-2.31]     | 0.388    | 0.757   |
| TRIM58      | 101         | 6         | 5.94%         | 196          | 21        | 10.71%        | 1.90 [0.86-4.19]     | 0.181    | 0.535   |
| TRIM65      | 101         | 4         | 3.96%         | 196          | 12        | 6.12%         | 1.58 [0.60-4.18]     | 0.438    | 0.798   |
| TRIM67      | 101         | 6         | 5.94%         | 196          | 19        | 9.69%         | 1.70 [0.77-3.78]     | 0.274    | 0.643   |
| TRIM72      | 101         | 4         | 3.96%         | 196          | 5         | 2.55%         | 0.63 [0.21-1.95]     | 0.505    | 0.805   |
| TRMT12      | 101         | 16        | 15.84%        | 196          | 57        | 29.08%        | 2.18 [1.30-3.66]     | 1.33E-02 | 0.507   |
| TRPA1       | 101         | 15        | 14.85%        | 196          | 41        | 20.92%        | 1.52 [0.88-2.61]     | 0.207    | 0.573   |
| TRPC4AP     | 101         | 4         | 3.96%         | 196          | 8         | 4.08%         | 1.03 [0.37-2.88]     | 0.960    | 1.000   |
| TRPS1       | 101         | 16        | 15.84%        | 196          | 58        | 29.59%        | 2.23 [1.33-3.74]     | 1.06E-02 | 0.507   |
| TRPV5       | 101         | 2         | 1.98%         | 196          | 4         | 2.04%         | 1.03 [0.24-4.35]     | 0.972    | 1.000   |
| TRPV6       | 101         | 2         | 1.98%         | 196          | 4         | 2.04%         | 1.03 [0.24-4.35]     | 0.972    | 1.000   |
| PRSS3P2     | 101         | 21        | 20.79%        | 196          | 37        | 18.88%        | 0.89 [0.54-1.47]     | 0.693    | 0.951   |
| TSC2        | 101         | 6         | 5.94%         | 196          | 5         | 2.55%         | 0.41 [0.15-1.15]     | 0.154    | 0.535   |
| TSEN15      | 101         | 5         | 4.95%         | 196          | 20        | 10.20%        | 2.18 [0.93-5.10]     | 0.130    | 0.535   |
| TSEN54      | 101         | 5         | 4.95%         | 196          | 12        | 6.12%         | 1.25 [0.51-3.08]     | 0.681    | 0.943   |
| TSM         | 101         | 0         | 0.00%         | 196          | 5         | 2.55%         | 2.2e+07 [0e+00-Inf]  | 0.992    | 1.000   |
| TSG101      | 101         | 1         | 0.99%         | 196          | 4         | 2.04%         | 2.08 [0.33-13.25]    | 0.514    | 0.805   |
| TSHZ2       | 101         | 11        | 10.89%        | 196          | 23        | 11.73%        | 1.09 [0.57-2.06]     | 0.829    | 1.000   |
| TSKU        | 101         | 6         | 5.94%         | 196          | 16        | 8.16%         | 1.41 [0.62-3.18]     | 0.490    | 0.805   |
| TSNARE1     | 101         | 17        | 16.83%        | 196          | 49        | 25.00%        | 1.65 [0.98-2.76]     | 0.111    | 0.511   |
| TSNAX-DISC1 | 101         | 6         | 5.94%         | 196          | 19        | 9.69%         | 1.70 [0.77-3.78]     | 0.274    | 0.643   |
| TSNAX       | 101         | 6         | 5.94%         | 196          | 19        | 9.69%         | 1.70 [0.77-3.78]     | 0.274    | 0.643   |
| TSPAN10     | 101         | 2         | 1.98%         | 196          | 12        | 6.12%         | 3.23 [0.90-11.53]    | 0.130    | 0.535   |
| TSPAN31     | 101         | 0         | 0.00%         | 196          | 5         | 2.55%         | 2.2e+07 [0e+00-Inf]  | 0.992    | 1.000   |
| TSPAN8      | 101         | 3         | 2.97%         | 196          | 13        | 6.63%         | 2.32 [0.79-6.79]     | 0.197    | 0.570   |
| TSPY1       | 101         | 0         | 0.00%         | 196          | 1         | 0.51%         | 3.2e+07 [0e+00-Inf]  | 0.997    | 1.000   |
| TSPY2       | 101         | 0         | 0.00%         | 196          | 0         | 0.00%         | 1.00 [0e+00-Inf]     | 1.000    | 1.000   |
| TSPY3       | 101         | 0         | 0.00%         | 196          | 0         | 0.00%         | 1.00 [0e+00-Inf]     | 1.000    | 1.000   |
| TSPY4       | 101         | 0         | 0.00%         | 196          | 0         | 0.00%         | 1.00 [0e+00-Inf]     | 1.000    | 1.000   |
| TSPYL5      | 101         | 15        | 14.85%        | 196          | 53        | 27.04%        | 2.12 [1.25-3.61]     | 1.95E-02 | 0.507   |
| TSTA3       | 101         | 16        | 15.84%        | 196          | 51        | 26.02%        | 1.87 [1.11-3.15]     | 4.89E-02 | 0.507   |
| TSTD1       | 101         | 6         | 5.94%         | 196          | 17        | 8.67%         | 1.50 [0.67-3.38]     | 0.407    | 0.774   |
| TTC13       | 101         | 6         | 5.94%         | 196          | 19        | 9.69%         | 1.70 [0.77-3.78]     | 0.274    | 0.643   |
| TTC14       | 101         | 4         | 3.96%         | 196          | 2         | 1.02%         | 0.25 [0.059-1.05]    | 0.113    | 0.511   |
| TTC23       | 101         | 1         | 0.99%         | 196          | 9         | 4.59%         | 4.81 [0.84-27.58]    | 0.139    | 0.535   |
| TTC24       | 101         | 6         | 5.94%         | 196          | 8         | 4.08%         | 0.67 [0.27-1.68]     | 0.476    | 0.805   |
| EMC2        | 101         | 15        | 14.85%        | 196          | 50        | 25.51%        | 1.96 [1.15-3.35]     | 3.75E-02 | 0.507   |
| TLL6        | 101         | 2         | 1.98%         | 196          | 19        | 9.69%         | 5.31 [1.54-18.36]    | 2.67E-02 | 0.507   |
| TTPAL       | 101         | 3         | 2.97%         | 196          | 4         | 2.04%         | 0.68 [0.19-2.43]     | 0.619    | 0.898   |
| TTPA        | 101         | 15        | 14.85%        | 196          | 33        | 16.84%        | 1.16 [0.66-2.03]     | 0.660    | 0.935   |
| TTTTY10     | 101         | 0         | 0.00%         | 196          | 0         | 0.00%         | 1.00 [0e+00-Inf]     | 1.000    | 1.000   |
| TTTTY11     | 101         | 0         | 0.00%         | 196          | 0         | 0.00%         | 1.00 [0e+00-Inf]     | 1.000    | 1.000   |
| TTTTY12     | 101         | 0         | 0.00%         | 196          | 0         | 0.00%         | 1.00 [0e+00-Inf]     | 1.000    | 1.000   |
| TTTTY13     | 101         | 0         | 0.00%         | 196          | 0         | 0.00%         | 1.00 [0e+00-Inf]     | 1.000    | 1.000   |
| TTTTY15     | 101         | 0         | 0.00%         | 196          | 0         | 0.00%         | 1.00 [0e+00-Inf]     | 1.000    | 1.000   |
| TTTTY16     | 101         | 0         | 0.00%         | 196          | 0         | 0.00%         | 1.00 [0e+00-Inf]     | 1.000    | 1.000   |
| TTTTY17A    | 101         | 0         | 0.00%         | 196          | 0         | 0.00%         | 1.00 [0e+00-Inf]     | 1.000    | 1.000   |
| TTTTY17B    | 101         | 0         | 0.00%         | 196          | 0         | 0.00%         | 1.00 [0e+00-Inf]     | 1.000    | 1.000   |
| TTTTY18     | 101         | 0         | 0.00%         | 196          | 0         | 0.00%         | 1.00 [0e+00-Inf]     | 1.000    | 1.000   |
| TTTTY19     | 101         | 0         | 0.00%         | 196          | 0         | 0.00%         | 1.00 [0e+00-Inf]     | 1.000    | 1.000   |
| TTTTY1B     | 101         | 0         | 0.00%         | 196          | 0         | 0.00%         | 1.00 [0e+00-Inf]     | 1.000    | 1.000   |
| TTTTY20     | 101         | 0         | 0.00%         | 196          | 0         | 0.00%         | 1.00 [0e+00-Inf]     | 1.000    | 1.000   |
| TTTTY21     | 101         | 0         | 0.00%         | 196          | 0         | 0.00%         | 1.00 [0e+00-Inf]     | 1.000    | 1.000   |
| TTTTY22     | 101         | 0         | 0.00%         | 196          | 0         | 0.00%         | 1.00 [0e+00-Inf]     | 1.000    | 1.000   |
| TTTTY23     | 101         | 0         | 0.00%         | 196          | 0         | 0.00%         | 1.00 [0e+00-Inf]     | 1.000    | 1.000   |
| TTTTY2      | 101         | 0         | 0.00%         | 196          | 0         | 0.00%         | 1.00 [0e+00-Inf]     | 1.000    | 1.000   |
| TTTTY3B     | 101         | 0         | 0.00%         | 196          | 0         | 0.00%         | 1.00 [0e+00-Inf]     | 1.000    | 1.000   |
| TTTTY4C     | 101         | 0         | 0.00%         | 196          | 0         | 0.00%         | 1.00 [0e+00-Inf]     | 1.000    | 1.000   |
| TTTTY5      | 101         | 0         | 0.00%         | 196          | 0         | 0.00%         | 1.00 [0e+00-Inf]     | 1.000    | 1.000   |
| TTTTY6B     | 101         | 0         | 0.00%         | 196          | 0         | 0.00%         | 1.00 [0e+00-Inf]     | 1.000    | 1.000   |

| Symbol    | CINSARC Low |           |               | CINSARC High |           |               | CINSARC High vs. Low |          |         |
|-----------|-------------|-----------|---------------|--------------|-----------|---------------|----------------------|----------|---------|
|           | N tested    | N altered | Fq alteration | N tested     | N altered | Fq alteration | OR [95%CI]           | p-value* | q-value |
| TTY6      | 101         | 0         | 0.00%         | 196          | 0         | 0.00%         | 1.00 [0e+00-Inf]     | 1.000    | 1.000   |
| TTY7      | 101         | 0         | 0.00%         | 196          | 0         | 0.00%         | 1.00 [0e+00-Inf]     | 1.000    | 1.000   |
| TTY8      | 101         | 0         | 0.00%         | 196          | 0         | 0.00%         | 1.00 [0e+00-Inf]     | 1.000    | 1.000   |
| TTY9B     | 101         | 0         | 0.00%         | 196          | 0         | 0.00%         | 1.00 [0e+00-Inf]     | 1.000    | 1.000   |
| TYH2      | 101         | 6         | 5.94%         | 196          | 15        | 7.65%         | 1.31 [0.58-2.98]     | 0.586    | 0.869   |
| TUBB1     | 101         | 9         | 8.91%         | 196          | 15        | 7.65%         | 0.85 [0.41-1.75]     | 0.707    | 0.962   |
| TUBD1     | 101         | 8         | 7.92%         | 196          | 34        | 17.35%        | 2.44 [1.23-4.82]     | 3.12E-02 | 0.507   |
| TUFM      | 101         | 6         | 5.94%         | 196          | 3         | 1.53%         | 0.25 [0.076-0.80]    | 0.051    | 0.507   |
| TUFT1     | 101         | 6         | 5.94%         | 196          | 12        | 6.12%         | 1.03 [0.44-2.41]     | 0.950    | 1.000   |
| TXNDC11   | 101         | 5         | 4.95%         | 196          | 3         | 1.53%         | 0.30 [0.088-1.01]    | 0.103    | 0.507   |
| TXNIP     | 101         | 5         | 4.95%         | 196          | 10        | 5.10%         | 1.03 [0.41-2.60]     | 0.955    | 1.000   |
| U2AF2     | 101         | 2         | 1.98%         | 196          | 4         | 2.04%         | 1.03 [0.24-4.35]     | 0.972    | 1.000   |
| UAP1      | 101         | 5         | 4.95%         | 196          | 15        | 7.65%         | 1.59 [0.66-3.81]     | 0.382    | 0.750   |
| UBAP2L    | 101         | 7         | 6.93%         | 196          | 12        | 6.12%         | 0.88 [0.39-1.97]     | 0.788    | 0.996   |
| UBE2C     | 101         | 5         | 4.95%         | 196          | 4         | 2.04%         | 0.40 [0.13-1.23]     | 0.179    | 0.535   |
| UBE2I     | 101         | 6         | 5.94%         | 196          | 5         | 2.55%         | 0.41 [0.15-1.15]     | 0.154    | 0.535   |
| UBE2MP1   | 101         | 2         | 1.98%         | 196          | 4         | 2.04%         | 1.03 [0.24-4.35]     | 0.972    | 1.000   |
| UBE2N     | 101         | 0         | 0.00%         | 196          | 5         | 2.55%         | 2.2e+07 [0e+00-Inf]  | 0.992    | 1.000   |
| UBE2O     | 101         | 3         | 2.97%         | 196          | 16        | 8.16%         | 2.90 [1.01-8.34]     | 0.097    | 0.507   |
| UBE2Q1    | 101         | 7         | 6.93%         | 196          | 12        | 6.12%         | 0.88 [0.39-1.97]     | 0.788    | 0.996   |
| UBE2Q2P1  | 101         | 1         | 0.99%         | 196          | 4         | 2.04%         | 2.08 [0.33-13.25]    | 0.514    | 0.805   |
| UBE2S     | 101         | 1         | 0.99%         | 196          | 4         | 2.04%         | 2.08 [0.33-13.25]    | 0.514    | 0.805   |
| UBE2T     | 101         | 7         | 6.93%         | 196          | 25        | 12.76%        | 1.96 [0.94-4.09]     | 0.131    | 0.535   |
| UBE2V1    | 101         | 6         | 5.94%         | 196          | 14        | 7.14%         | 1.22 [0.53-2.79]     | 0.696    | 0.951   |
| UBE2V2    | 101         | 14        | 13.86%        | 196          | 27        | 13.78%        | 0.99 [0.55-1.78]     | 0.984    | 1.000   |
| UBE2W     | 101         | 17        | 16.83%        | 196          | 40        | 20.41%        | 1.27 [0.75-2.14]     | 0.459    | 0.805   |
| UBE2Z     | 101         | 2         | 1.98%         | 196          | 18        | 9.18%         | 5.01 [1.44-17.35]    | 3.31E-02 | 0.507   |
| UBFD1     | 101         | 5         | 4.95%         | 196          | 3         | 1.53%         | 0.30 [0.088-1.01]    | 0.103    | 0.507   |
| UBL3      | 101         | 1         | 0.99%         | 196          | 4         | 2.04%         | 2.08 [0.33-13.25]    | 0.514    | 0.805   |
| UBN1      | 101         | 5         | 4.95%         | 196          | 5         | 2.55%         | 0.50 [0.17-1.45]     | 0.286    | 0.650   |
| UBQLN4    | 101         | 6         | 5.94%         | 196          | 9         | 4.59%         | 0.76 [0.31-1.86]     | 0.616    | 0.898   |
| UBR5      | 101         | 16        | 15.84%        | 196          | 55        | 28.06%        | 2.07 [1.23-3.48]     | 2.09E-02 | 0.507   |
| UBTFL1    | 101         | 1         | 0.99%         | 196          | 4         | 2.04%         | 2.08 [0.33-13.25]    | 0.514    | 0.805   |
| UBXN2B    | 101         | 14        | 13.86%        | 196          | 33        | 16.84%        | 1.26 [0.71-2.22]     | 0.506    | 0.805   |
| UBXN7     | 101         | 4         | 3.96%         | 196          | 4         | 2.04%         | 0.51 [0.16-1.65]     | 0.342    | 0.716   |
| UBXN8     | 101         | 2         | 1.98%         | 196          | 6         | 3.06%         | 1.56 [0.40-6.08]     | 0.589    | 0.869   |
| UCHL5     | 101         | 5         | 4.95%         | 196          | 17        | 8.67%         | 1.82 [0.77-4.32]     | 0.252    | 0.623   |
| UCK2      | 101         | 4         | 3.96%         | 196          | 13        | 6.63%         | 1.72 [0.66-4.51]     | 0.353    | 0.722   |
| UCKL1-AS1 | 101         | 6         | 5.94%         | 196          | 11        | 5.61%         | 0.94 [0.40-2.23]     | 0.908    | 1.000   |
| UCKL1     | 101         | 6         | 5.94%         | 196          | 11        | 5.61%         | 0.94 [0.40-2.23]     | 0.908    | 1.000   |
| UCP2      | 101         | 7         | 6.93%         | 196          | 12        | 6.12%         | 0.88 [0.39-1.97]     | 0.788    | 0.996   |
| UCP3      | 101         | 7         | 6.93%         | 196          | 12        | 6.12%         | 0.88 [0.39-1.97]     | 0.788    | 0.996   |
| UFC1      | 101         | 6         | 5.94%         | 196          | 16        | 8.16%         | 1.41 [0.62-3.18]     | 0.490    | 0.805   |
| UHMK1     | 101         | 5         | 4.95%         | 196          | 15        | 7.65%         | 1.59 [0.66-3.81]     | 0.382    | 0.750   |
| ULK2      | 101         | 4         | 3.96%         | 196          | 1         | 0.51%         | 0.12 [0.02-0.79]     | 0.064    | 0.507   |
| UMOD      | 101         | 5         | 4.95%         | 196          | 3         | 1.53%         | 0.30 [0.088-1.01]    | 0.103    | 0.507   |
| UNC119    | 101         | 3         | 2.97%         | 196          | 8         | 4.08%         | 1.39 [0.45-4.31]     | 0.632    | 0.909   |
| UNC13D    | 101         | 4         | 3.96%         | 196          | 12        | 6.12%         | 1.58 [0.60-4.18]     | 0.438    | 0.798   |
| UNC45A    | 101         | 1         | 0.99%         | 196          | 4         | 2.04%         | 2.08 [0.33-13.25]    | 0.514    | 0.805   |
| UNC45B    | 101         | 1         | 0.99%         | 196          | 5         | 2.55%         | 2.62 [0.43-16.05]    | 0.383    | 0.750   |
| UNC5D     | 101         | 6         | 5.94%         | 196          | 16        | 8.16%         | 1.41 [0.62-3.18]     | 0.490    | 0.805   |
| UNC93B1   | 101         | 9         | 8.91%         | 196          | 21        | 10.71%        | 1.23 [0.62-2.44]     | 0.626    | 0.907   |
| UNKL      | 101         | 6         | 5.94%         | 196          | 5         | 2.55%         | 0.41 [0.15-1.15]     | 0.154    | 0.535   |
| UNK       | 101         | 4         | 3.96%         | 196          | 12        | 6.12%         | 1.58 [0.60-4.18]     | 0.438    | 0.798   |
| UQCC1     | 101         | 4         | 3.96%         | 196          | 6         | 3.06%         | 0.77 [0.26-2.26]     | 0.685    | 0.943   |
| UQCRB     | 101         | 16        | 15.84%        | 196          | 53        | 27.04%        | 1.97 [1.17-3.31]     | 3.23E-02 | 0.507   |
| UQCRC2    | 101         | 5         | 4.95%         | 196          | 3         | 1.53%         | 0.30 [0.088-1.01]    | 0.103    | 0.507   |
| URB2      | 101         | 6         | 5.94%         | 196          | 19        | 9.69%         | 1.70 [0.77-3.78]     | 0.274    | 0.643   |
| USF1      | 101         | 6         | 5.94%         | 196          | 17        | 8.67%         | 1.50 [0.67-3.38]     | 0.407    | 0.774   |
| USH1C     | 101         | 1         | 0.99%         | 196          | 4         | 2.04%         | 2.08 [0.33-13.25]    | 0.514    | 0.805   |
| USH1G     | 101         | 5         | 4.95%         | 196          | 13        | 6.63%         | 1.36 [0.56-3.32]     | 0.566    | 0.852   |
| USH2A     | 101         | 6         | 5.94%         | 196          | 19        | 9.69%         | 1.70 [0.77-3.78]     | 0.274    | 0.643   |
| USO1      | 101         | 2         | 1.98%         | 196          | 5         | 2.55%         | 1.30 [0.32-5.21]     | 0.759    | 0.996   |
| USP13     | 101         | 4         | 3.96%         | 196          | 2         | 1.02%         | 0.25 [0.059-1.05]    | 0.113    | 0.511   |
| USP17L2   | 101         | 2         | 1.98%         | 196          | 4         | 2.04%         | 1.03 [0.24-4.35]     | 0.972    | 1.000   |
| USP21     | 101         | 6         | 5.94%         | 196          | 16        | 8.16%         | 1.41 [0.62-3.18]     | 0.490    | 0.805   |
| USP31     | 101         | 5         | 4.95%         | 196          | 2         | 1.02%         | 0.20 [0.049-0.80]    | 0.056    | 0.507   |
| USP32     | 101         | 7         | 6.93%         | 196          | 33        | 16.84%        | 2.72 [1.33-5.57]     | 2.17E-02 | 0.507   |
| USP35     | 101         | 8         | 7.92%         | 196          | 17        | 8.67%         | 1.10 [0.53-2.30]     | 0.825    | 1.000   |
| USP36     | 101         | 3         | 2.97%         | 196          | 13        | 6.63%         | 2.32 [0.79-6.79]     | 0.197    | 0.570   |
| USP54     | 101         | 0         | 0.00%         | 196          | 5         | 2.55%         | 2.2e+07 [0e+00-Inf]  | 0.992    | 1.000   |

| Symbol  | CINSARC Low |           |               | CINSARC High |           |               | CINSARC High vs. Low |          |         |
|---------|-------------|-----------|---------------|--------------|-----------|---------------|----------------------|----------|---------|
|         | N tested    | N altered | Fq alteration | N tested     | N altered | Fq alteration | OR [95%CI]           | p-value* | q-value |
| USP7    | 101         | 6         | 5.94%         | 196          | 5         | 2.55%         | 0.41 [0.15-1.15]     | 0.154    | 0.535   |
| USP9Y   | 101         | 0         | 0.00%         | 196          | 0         | 0.00%         | 1.00 [0e+00-Inf]     | 1.000    | 1.000   |
| USPL1   | 101         | 1         | 0.99%         | 196          | 4         | 2.04%         | 2.08 [0.33-13.25]    | 0.514    | 0.805   |
| UTP18   | 101         | 4         | 3.96%         | 196          | 15        | 7.65%         | 2.01 [0.78-5.19]     | 0.226    | 0.598   |
| UTP23   | 101         | 16        | 15.84%        | 196          | 58        | 29.59%        | 2.23 [1.33-3.74]     | 1.06E-02 | 0.507   |
| UTS2B   | 101         | 2         | 1.98%         | 196          | 3         | 1.53%         | 0.77 [0.17-3.50]     | 0.776    | 0.996   |
| UTS2R   | 101         | 2         | 1.98%         | 196          | 13        | 6.63%         | 3.52 [0.99-12.47]    | 0.102    | 0.507   |
| UTY     | 101         | 0         | 0.00%         | 196          | 0         | 0.00%         | 1.00 [0e+00-Inf]     | 1.000    | 1.000   |
| UVRAG   | 101         | 5         | 4.95%         | 196          | 19        | 9.69%         | 2.06 [0.88-4.83]     | 0.163    | 0.535   |
| VAMP4   | 101         | 5         | 4.95%         | 196          | 13        | 6.63%         | 1.36 [0.56-3.32]     | 0.566    | 0.852   |
| VANGL2  | 101         | 5         | 4.95%         | 196          | 14        | 7.14%         | 1.48 [0.61-3.57]     | 0.467    | 0.805   |
| VAPB    | 101         | 9         | 8.91%         | 196          | 17        | 8.67%         | 0.97 [0.48-1.97]     | 0.945    | 1.000   |
| VASH2   | 101         | 6         | 5.94%         | 196          | 21        | 10.71%        | 1.90 [0.86-4.19]     | 0.181    | 0.535   |
| VASN    | 101         | 5         | 4.95%         | 196          | 6         | 3.06%         | 0.61 [0.22-1.68]     | 0.418    | 0.779   |
| VCL     | 101         | 0         | 0.00%         | 196          | 5         | 2.55%         | 2.2e+07 [0e+00-Inf]  | 0.992    | 1.000   |
| VCPIP1  | 101         | 15        | 14.85%        | 196          | 38        | 19.39%        | 1.38 [0.80-2.38]     | 0.335    | 0.716   |
| VCP     | 101         | 1         | 0.99%         | 196          | 4         | 2.04%         | 2.08 [0.33-13.25]    | 0.514    | 0.805   |
| VCY     | 101         | 0         | 0.00%         | 196          | 0         | 0.00%         | 1.00 [0e+00-Inf]     | 1.000    | 1.000   |
| VDAC2   | 101         | 2         | 1.98%         | 196          | 6         | 3.06%         | 1.56 [0.40-6.08]     | 0.589    | 0.869   |
| VDAC3   | 101         | 14        | 13.86%        | 196          | 31        | 15.82%        | 1.17 [0.66-2.07]     | 0.656    | 0.931   |
| VEZF1   | 101         | 6         | 5.94%         | 196          | 25        | 12.76%        | 2.31 [1.06-5.03]     | 0.076    | 0.507   |
| VHLL    | 101         | 6         | 5.94%         | 196          | 9         | 4.59%         | 0.76 [0.31-1.86]     | 0.616    | 0.898   |
| VKORC1  | 101         | 4         | 3.96%         | 196          | 6         | 3.06%         | 0.77 [0.26-2.26]     | 0.685    | 0.943   |
| VN1R5   | 101         | 5         | 4.95%         | 196          | 19        | 9.69%         | 2.06 [0.88-4.83]     | 0.163    | 0.535   |
| VPS13B  | 101         | 15        | 14.85%        | 196          | 55        | 28.06%        | 2.24 [1.32-3.80]     | 1.24E-02 | 0.507   |
| VPS28   | 101         | 18        | 17.82%        | 196          | 49        | 25.00%        | 1.54 [0.93-2.55]     | 0.163    | 0.535   |
| VPS37C  | 101         | 2         | 1.98%         | 196          | 3         | 1.53%         | 0.77 [0.17-3.50]     | 0.776    | 0.996   |
| VPS41   | 101         | 0         | 0.00%         | 196          | 5         | 2.55%         | 2.2e+07 [0e+00-Inf]  | 0.992    | 1.000   |
| VPS45   | 101         | 8         | 7.92%         | 196          | 14        | 7.14%         | 0.89 [0.42-1.91]     | 0.808    | 1.000   |
| VPS4B   | 101         | 3         | 2.97%         | 196          | 2         | 1.02%         | 0.34 [0.074-1.53]    | 0.237    | 0.599   |
| VPS72   | 101         | 7         | 6.93%         | 196          | 13        | 6.63%         | 0.95 [0.43-2.12]     | 0.923    | 1.000   |
| VPS8    | 101         | 3         | 2.97%         | 196          | 2         | 1.02%         | 0.34 [0.074-1.53]    | 0.237    | 0.599   |
| VSIG8   | 101         | 6         | 5.94%         | 196          | 10        | 5.10%         | 0.85 [0.36-2.04]     | 0.762    | 0.996   |
| VSTM2L  | 101         | 5         | 4.95%         | 196          | 3         | 1.53%         | 0.30 [0.088-1.01]    | 0.103    | 0.507   |
| VTN     | 101         | 3         | 2.97%         | 196          | 7         | 3.57%         | 1.21 [0.38-3.83]     | 0.786    | 0.996   |
| VWA3A   | 101         | 6         | 5.94%         | 196          | 3         | 1.53%         | 0.25 [0.076-0.80]    | 0.051    | 0.507   |
| VWASB2  | 101         | 3         | 2.97%         | 196          | 2         | 1.02%         | 0.34 [0.074-1.53]    | 0.237    | 0.599   |
| VWCE    | 101         | 2         | 1.98%         | 196          | 4         | 2.04%         | 1.03 [0.24-4.35]     | 0.972    | 1.000   |
| WBP2    | 101         | 4         | 3.96%         | 196          | 13        | 6.63%         | 1.72 [0.66-4.51]     | 0.353    | 0.722   |
| WDR24   | 101         | 6         | 5.94%         | 196          | 4         | 2.04%         | 0.33 [0.11-0.97]     | 0.092    | 0.507   |
| WDR26   | 101         | 7         | 6.93%         | 196          | 17        | 8.67%         | 1.28 [0.59-2.75]     | 0.602    | 0.887   |
| WDR45B  | 101         | 2         | 1.98%         | 196          | 15        | 7.65%         | 4.10 [1.17-14.39]    | 0.064    | 0.507   |
| WDR53   | 101         | 4         | 3.96%         | 196          | 4         | 2.04%         | 0.51 [0.16-1.65]     | 0.342    | 0.716   |
| WDR64   | 101         | 4         | 3.96%         | 196          | 20        | 10.20%        | 2.76 [1.09-6.95]     | 0.071    | 0.507   |
| TBC1D31 | 101         | 14        | 13.86%        | 196          | 56        | 28.57%        | 2.49 [1.45-4.27]     | 5.58E-03 | 0.507   |
| WDR73   | 101         | 1         | 0.99%         | 196          | 5         | 2.55%         | 2.62 [0.43-16.05]    | 0.383    | 0.750   |
| WDR90   | 101         | 6         | 5.94%         | 196          | 4         | 2.04%         | 0.33 [0.11-0.97]     | 0.092    | 0.507   |
| WDR93   | 101         | 1         | 0.99%         | 196          | 7         | 3.57%         | 3.70 [0.63-21.75]    | 0.224    | 0.596   |
| WDYHV1  | 101         | 14        | 13.86%        | 196          | 58        | 29.59%        | 2.61 [1.52-4.48]     | 3.40E-03 | 0.507   |
| WFDC10A | 101         | 5         | 4.95%         | 196          | 3         | 1.53%         | 0.30 [0.088-1.01]    | 0.103    | 0.507   |
| WFDC10B | 101         | 5         | 4.95%         | 196          | 3         | 1.53%         | 0.30 [0.088-1.01]    | 0.103    | 0.507   |
| WFDC11  | 101         | 5         | 4.95%         | 196          | 3         | 1.53%         | 0.30 [0.088-1.01]    | 0.103    | 0.507   |
| WFDC12  | 101         | 5         | 4.95%         | 196          | 2         | 1.02%         | 0.20 [0.049-0.80]    | 0.056    | 0.507   |
| WFDC13  | 101         | 5         | 4.95%         | 196          | 3         | 1.53%         | 0.30 [0.088-1.01]    | 0.103    | 0.507   |
| WFDC2   | 101         | 5         | 4.95%         | 196          | 3         | 1.53%         | 0.30 [0.088-1.01]    | 0.103    | 0.507   |
| WFDC3   | 101         | 5         | 4.95%         | 196          | 3         | 1.53%         | 0.30 [0.088-1.01]    | 0.103    | 0.507   |
| WFDC5   | 101         | 5         | 4.95%         | 196          | 2         | 1.02%         | 0.20 [0.049-0.80]    | 0.056    | 0.507   |
| WFDC6   | 101         | 5         | 4.95%         | 196          | 3         | 1.53%         | 0.30 [0.088-1.01]    | 0.103    | 0.507   |
| WFDC8   | 101         | 5         | 4.95%         | 196          | 3         | 1.53%         | 0.30 [0.088-1.01]    | 0.103    | 0.507   |
| WFDC9   | 101         | 5         | 4.95%         | 196          | 3         | 1.53%         | 0.30 [0.088-1.01]    | 0.103    | 0.507   |
| WFIKKN1 | 101         | 6         | 5.94%         | 196          | 4         | 2.04%         | 0.33 [0.11-0.97]     | 0.092    | 0.507   |
| WFIKKN2 | 101         | 4         | 3.96%         | 196          | 21        | 10.71%        | 2.91 [1.16-7.31]     | 0.056    | 0.507   |
| WHAMM   | 101         | 1         | 0.99%         | 196          | 4         | 2.04%         | 2.08 [0.33-13.25]    | 0.514    | 0.805   |
| WIF1    | 101         | 2         | 1.98%         | 196          | 5         | 2.55%         | 1.30 [0.32-5.21]     | 0.759    | 0.996   |
| WIPF2   | 101         | 4         | 3.96%         | 196          | 8         | 4.08%         | 1.03 [0.37-2.88]     | 0.960    | 1.000   |
| WIPF3   | 101         | 0         | 0.00%         | 196          | 6         | 3.06%         | 2.7e+07 [0e+00-Inf]  | 0.992    | 1.000   |
| WIPI1   | 101         | 8         | 7.92%         | 196          | 27        | 13.78%        | 1.86 [0.93-3.72]     | 0.143    | 0.535   |
| WNT11   | 101         | 6         | 5.94%         | 196          | 17        | 8.67%         | 1.50 [0.67-3.38]     | 0.407    | 0.774   |
| WNT3A   | 101         | 6         | 5.94%         | 196          | 21        | 10.71%        | 1.90 [0.86-4.19]     | 0.181    | 0.535   |
| WNT3    | 101         | 1         | 0.99%         | 196          | 5         | 2.55%         | 2.62 [0.43-16.05]    | 0.383    | 0.750   |
| WNT9A   | 101         | 7         | 6.93%         | 196          | 21        | 10.71%        | 1.61 [0.76-3.40]     | 0.294    | 0.650   |

| Symbol   | CINSARC Low |           |               | CINSARC High |           |               | CINSARC High vs. Low |          |         |
|----------|-------------|-----------|---------------|--------------|-----------|---------------|----------------------|----------|---------|
|          | N tested    | N altered | Fq alteration | N tested     | N altered | Fq alteration | OR [95%CI]           | p-value* | q-value |
| WNT9B    | 101         | 1         | 0.99%         | 196          | 5         | 2.55%         | 2.62 [0.43-16.05]    | 0.383    | 0.750   |
| WRN      | 101         | 2         | 1.98%         | 196          | 6         | 3.06%         | 1.56 [0.40-6.08]     | 0.589    | 0.869   |
| WSB1     | 101         | 3         | 2.97%         | 196          | 4         | 2.04%         | 0.68 [0.19-2.43]     | 0.619    | 0.898   |
| WWP1     | 101         | 18        | 17.82%        | 196          | 47        | 23.98%        | 1.45 [0.87-2.42]     | 0.226    | 0.598   |
| XCL1     | 101         | 5         | 4.95%         | 196          | 15        | 7.65%         | 1.59 [0.66-3.81]     | 0.382    | 0.750   |
| XCL2     | 101         | 5         | 4.95%         | 196          | 13        | 6.63%         | 1.36 [0.56-3.32]     | 0.566    | 0.852   |
| XKRA     | 101         | 13        | 12.87%        | 196          | 30        | 15.31%        | 1.22 [0.68-2.20]     | 0.573    | 0.860   |
| XKR9     | 101         | 16        | 15.84%        | 196          | 39        | 19.90%        | 1.32 [0.77-2.26]     | 0.395    | 0.770   |
| XKRY2    | 101         | 0         | 0.00%         | 196          | 0         | 0.00%         | 1.00 [0e+00-Inf]     | 1.000    | 1.000   |
| XKRY     | 101         | 0         | 0.00%         | 196          | 0         | 0.00%         | 1.00 [0e+00-Inf]     | 1.000    | 1.000   |
| XPO6     | 101         | 5         | 4.95%         | 196          | 3         | 1.53%         | 0.30 [0.088-1.01]    | 0.103    | 0.507   |
| XPOT     | 101         | 1         | 0.99%         | 196          | 4         | 2.04%         | 2.08 [0.33-13.25]    | 0.514    | 0.805   |
| XPR1     | 101         | 6         | 5.94%         | 196          | 18        | 9.18%         | 1.60 [0.72-3.57]     | 0.335    | 0.716   |
| XRRA1    | 101         | 5         | 4.95%         | 196          | 15        | 7.65%         | 1.59 [0.66-3.81]     | 0.382    | 0.750   |
| XYLT1    | 101         | 6         | 5.94%         | 196          | 4         | 2.04%         | 0.33 [0.11-0.97]     | 0.092    | 0.507   |
| XYLT2    | 101         | 4         | 3.96%         | 196          | 19        | 9.69%         | 2.60 [1.03-6.59]     | 0.090    | 0.507   |
| YEATS2   | 101         | 3         | 2.97%         | 196          | 2         | 1.02%         | 0.34 [0.074-1.53]    | 0.237    | 0.599   |
| YEATS4   | 101         | 2         | 1.98%         | 196          | 18        | 9.18%         | 5.01 [1.44-17.35]    | 3.31E-02 | 0.507   |
| YIF1A    | 101         | 2         | 1.98%         | 196          | 6         | 3.06%         | 1.56 [0.40-6.08]     | 0.589    | 0.869   |
| YKT6     | 101         | 0         | 0.00%         | 196          | 5         | 2.55%         | 2.2e+07 [0e+00-Inf]  | 0.992    | 1.000   |
| YOD1     | 101         | 6         | 5.94%         | 196          | 24        | 12.24%        | 2.21 [1.01-4.82]     | 0.095    | 0.507   |
| YPEL2    | 101         | 8         | 7.92%         | 196          | 30        | 15.31%        | 2.10 [1.06-4.18]     | 0.076    | 0.507   |
| YPEL3    | 101         | 5         | 4.95%         | 196          | 4         | 2.04%         | 0.40 [0.13-1.23]     | 0.179    | 0.535   |
| YTHDF1   | 101         | 7         | 6.93%         | 196          | 12        | 6.12%         | 0.88 [0.39-1.97]     | 0.788    | 0.996   |
| YTHDF3   | 101         | 15        | 14.85%        | 196          | 32        | 16.33%        | 1.12 [0.64-1.96]     | 0.742    | 0.996   |
| YWHAB    | 101         | 4         | 3.96%         | 196          | 4         | 2.04%         | 0.51 [0.16-1.65]     | 0.342    | 0.716   |
| YWHAZ    | 101         | 15        | 14.85%        | 196          | 57        | 29.08%        | 2.35 [1.39-3.99]     | 7.74E-03 | 0.507   |
| YY1AP1   | 101         | 7         | 6.93%         | 196          | 9         | 4.59%         | 0.65 [0.27-1.52]     | 0.401    | 0.774   |
| ZACN     | 101         | 4         | 3.96%         | 196          | 13        | 6.63%         | 1.72 [0.66-4.51]     | 0.353    | 0.722   |
| ZBP1     | 101         | 9         | 8.91%         | 196          | 16        | 8.16%         | 0.91 [0.44-1.86]     | 0.826    | 1.000   |
| ZBTB10   | 101         | 17        | 16.83%        | 196          | 50        | 25.51%        | 1.69 [1.01-2.83]     | 0.092    | 0.507   |
| ZBTB37   | 101         | 5         | 4.95%         | 196          | 13        | 6.63%         | 1.36 [0.56-3.32]     | 0.566    | 0.852   |
| ZBTB41   | 101         | 5         | 4.95%         | 196          | 21        | 10.71%        | 2.30 [0.99-5.36]     | 0.104    | 0.507   |
| ZBTB46   | 101         | 7         | 6.93%         | 196          | 13        | 6.63%         | 0.95 [0.43-2.12]     | 0.923    | 1.000   |
| ZBTB7B   | 101         | 8         | 7.92%         | 196          | 15        | 7.65%         | 0.96 [0.46-2.04]     | 0.935    | 1.000   |
| ZC3H11A  | 101         | 7         | 6.93%         | 196          | 27        | 13.78%        | 2.15 [1.03-4.45]     | 0.085    | 0.507   |
| ZC3H3    | 101         | 17        | 16.83%        | 196          | 51        | 26.02%        | 1.74 [1.04-2.90]     | 0.076    | 0.507   |
| ZC3H7A   | 101         | 5         | 4.95%         | 196          | 3         | 1.53%         | 0.30 [0.088-1.01]    | 0.103    | 0.507   |
| ZCCHC2   | 101         | 4         | 3.96%         | 196          | 2         | 1.02%         | 0.25 [0.059-1.05]    | 0.113    | 0.511   |
| ZDHHHC17 | 101         | 0         | 0.00%         | 196          | 7         | 3.57%         | 3.2e+07 [0e+00-Inf]  | 0.992    | 1.000   |
| ZDHHHC19 | 101         | 4         | 3.96%         | 196          | 3         | 1.53%         | 0.38 [0.11-1.35]     | 0.207    | 0.573   |
| ZDHHHC24 | 101         | 5         | 4.95%         | 196          | 11        | 5.61%         | 1.14 [0.46-2.84]     | 0.811    | 1.000   |
| ZFAND1   | 101         | 18        | 17.82%        | 196          | 46        | 23.47%        | 1.41 [0.85-2.35]     | 0.263    | 0.643   |
| ZFAT-AS1 | 101         | 16        | 15.84%        | 196          | 54        | 27.55%        | 2.02 [1.20-3.40]     | 2.60E-02 | 0.507   |
| ZFAT     | 101         | 16        | 15.84%        | 196          | 54        | 27.55%        | 2.02 [1.20-3.40]     | 2.60E-02 | 0.507   |
| ZFC3H1   | 101         | 1         | 0.99%         | 196          | 13        | 6.63%         | 7.10 [1.27-39.64]    | 0.061    | 0.507   |
| ZFHX4    | 101         | 15        | 14.85%        | 196          | 46        | 23.47%        | 1.76 [1.03-3.01]     | 0.084    | 0.507   |
| ZFP41    | 101         | 16        | 15.84%        | 196          | 51        | 26.02%        | 1.87 [1.11-3.15]     | 4.89E-02 | 0.507   |
| ZFP64    | 101         | 9         | 8.91%         | 196          | 15        | 7.65%         | 0.85 [0.41-1.75]     | 0.707    | 0.962   |
| ZFPM2    | 101         | 16        | 15.84%        | 196          | 52        | 26.53%        | 1.92 [1.14-3.23]     | 3.98E-02 | 0.507   |
| ZFY      | 101         | 0         | 0.00%         | 196          | 0         | 0.00%         | 1.00 [0e+00-Inf]     | 1.000    | 1.000   |
| ZG16B    | 101         | 6         | 5.94%         | 196          | 5         | 2.55%         | 0.41 [0.15-1.15]     | 0.154    | 0.535   |
| ZG16     | 101         | 5         | 4.95%         | 196          | 3         | 1.53%         | 0.30 [0.088-1.01]    | 0.103    | 0.507   |
| ZGPAT    | 101         | 7         | 6.93%         | 196          | 15        | 7.65%         | 1.11 [0.51-2.43]     | 0.822    | 1.000   |
| ZHX1     | 101         | 14        | 13.86%        | 196          | 57        | 29.08%        | 2.55 [1.49-4.37]     | 4.36E-03 | 0.507   |
| ZHX2     | 101         | 14        | 13.86%        | 196          | 56        | 28.57%        | 2.49 [1.45-4.27]     | 5.58E-03 | 0.507   |
| ZHX3     | 101         | 3         | 2.97%         | 196          | 7         | 3.57%         | 1.21 [0.38-3.83]     | 0.786    | 0.996   |
| ZKSCAN2  | 101         | 5         | 4.95%         | 196          | 4         | 2.04%         | 0.40 [0.13-1.23]     | 0.179    | 0.535   |
| ZMAT3    | 101         | 4         | 3.96%         | 196          | 3         | 1.53%         | 0.38 [0.11-1.35]     | 0.207    | 0.573   |
| ZMAT4    | 101         | 13        | 12.87%        | 196          | 32        | 16.33%        | 1.32 [0.74-2.37]     | 0.432    | 0.798   |
| MSS51    | 101         | 0         | 0.00%         | 196          | 5         | 2.55%         | 2.2e+07 [0e+00-Inf]  | 0.992    | 1.000   |
| ZMYND8   | 101         | 6         | 5.94%         | 196          | 8         | 4.08%         | 0.67 [0.27-1.68]     | 0.476    | 0.805   |
| ZNF124   | 101         | 5         | 4.95%         | 196          | 19        | 9.69%         | 2.06 [0.88-4.83]     | 0.163    | 0.535   |
| ZNF160   | 101         | 1         | 0.99%         | 196          | 4         | 2.04%         | 2.08 [0.33-13.25]    | 0.514    | 0.805   |
| ZNF16    | 101         | 16        | 15.84%        | 196          | 48        | 24.49%        | 1.72 [1.02-2.91]     | 0.088    | 0.507   |
| ZNF174   | 101         | 5         | 4.95%         | 196          | 4         | 2.04%         | 0.40 [0.13-1.23]     | 0.179    | 0.535   |
| ZNF200   | 101         | 5         | 4.95%         | 196          | 4         | 2.04%         | 0.40 [0.13-1.23]     | 0.179    | 0.535   |
| ZNF205   | 101         | 6         | 5.94%         | 196          | 4         | 2.04%         | 0.33 [0.11-0.97]     | 0.092    | 0.507   |
| ZNF213   | 101         | 6         | 5.94%         | 196          | 4         | 2.04%         | 0.33 [0.11-0.97]     | 0.092    | 0.507   |
| ZNF217   | 101         | 12        | 11.88%        | 196          | 26        | 13.27%        | 1.13 [0.61-2.09]     | 0.735    | 0.993   |
| ZBTB18   | 101         | 5         | 4.95%         | 196          | 19        | 9.69%         | 2.06 [0.88-4.83]     | 0.163    | 0.535   |

| Symbol  | CINSARC Low |           |               | CINSARC High |           |               | CINSARC High vs. Low |          |         |
|---------|-------------|-----------|---------------|--------------|-----------|---------------|----------------------|----------|---------|
|         | N tested    | N altered | Fq alteration | N tested     | N altered | Fq alteration | OR [95%CI]           | p-value* | q-value |
| ZNF250  | 101         | 16        | 15.84%        | 196          | 48        | 24.49%        | 1.72 [1.02-2.91]     | 0.088    | 0.507   |
| ZNF251  | 101         | 17        | 16.83%        | 196          | 49        | 25.00%        | 1.65 [0.98-2.76]     | 0.111    | 0.511   |
| ZNF252P | 101         | 16        | 15.84%        | 196          | 47        | 23.98%        | 1.68 [0.99-2.84]     | 0.106    | 0.507   |
| ZNF263  | 101         | 5         | 4.95%         | 196          | 4         | 2.04%         | 0.40 [0.13-1.23]     | 0.179    | 0.535   |
| ZNF267  | 101         | 4         | 3.96%         | 196          | 4         | 2.04%         | 0.51 [0.16-1.65]     | 0.342    | 0.716   |
| ZNF281  | 101         | 6         | 5.94%         | 196          | 24        | 12.24%        | 2.21 [1.01-4.82]     | 0.095    | 0.507   |
| ZNF311  | 101         | 3         | 2.97%         | 196          | 5         | 2.55%         | 0.86 [0.25-2.89]     | 0.833    | 1.000   |
| ZNF334  | 101         | 4         | 3.96%         | 196          | 6         | 3.06%         | 0.77 [0.26-2.26]     | 0.685    | 0.943   |
| ZNF335  | 101         | 5         | 4.95%         | 196          | 4         | 2.04%         | 0.40 [0.13-1.23]     | 0.179    | 0.535   |
| ZNF347  | 101         | 1         | 0.99%         | 196          | 4         | 2.04%         | 2.08 [0.33-13.25]    | 0.514    | 0.805   |
| ZNF34   | 101         | 17        | 16.83%        | 196          | 49        | 25.00%        | 1.65 [0.98-2.76]     | 0.111    | 0.511   |
| ZNF350  | 101         | 1         | 0.99%         | 196          | 4         | 2.04%         | 2.08 [0.33-13.25]    | 0.514    | 0.805   |
| ZNF415  | 101         | 1         | 0.99%         | 196          | 4         | 2.04%         | 2.08 [0.33-13.25]    | 0.514    | 0.805   |
| ZSCAN32 | 101         | 5         | 4.95%         | 196          | 4         | 2.04%         | 0.40 [0.13-1.23]     | 0.179    | 0.535   |
| ZNF468  | 101         | 1         | 0.99%         | 196          | 4         | 2.04%         | 2.08 [0.33-13.25]    | 0.514    | 0.805   |
| ZNF48   | 101         | 4         | 3.96%         | 196          | 5         | 2.55%         | 0.63 [0.21-1.95]     | 0.505    | 0.805   |
| ZNF496  | 101         | 5         | 4.95%         | 196          | 19        | 9.69%         | 2.06 [0.88-4.83]     | 0.163    | 0.535   |
| ZNF500  | 101         | 5         | 4.95%         | 196          | 5         | 2.55%         | 0.50 [0.17-1.45]     | 0.286    | 0.650   |
| ZNF503  | 101         | 2         | 1.98%         | 196          | 5         | 2.55%         | 1.30 [0.32-5.21]     | 0.759    | 0.996   |
| ZNF512B | 101         | 6         | 5.94%         | 196          | 11        | 5.61%         | 0.94 [0.40-2.23]     | 0.908    | 1.000   |
| ZNF517  | 101         | 16        | 15.84%        | 196          | 49        | 25.00%        | 1.77 [1.05-2.99]     | 0.073    | 0.507   |
| ZNF524  | 101         | 2         | 1.98%         | 196          | 4         | 2.04%         | 1.03 [0.24-4.35]     | 0.972    | 1.000   |
| ZNF532  | 101         | 1         | 0.99%         | 196          | 4         | 2.04%         | 2.08 [0.33-13.25]    | 0.514    | 0.805   |
| ZNF572  | 101         | 16        | 15.84%        | 196          | 57        | 29.08%        | 2.18 [1.30-3.66]     | 1.33E-02 | 0.507   |
| ZNF579  | 101         | 2         | 1.98%         | 196          | 4         | 2.04%         | 1.03 [0.24-4.35]     | 0.972    | 1.000   |
| ZNF580  | 101         | 2         | 1.98%         | 196          | 4         | 2.04%         | 1.03 [0.24-4.35]     | 0.972    | 1.000   |
| ZNF581  | 101         | 2         | 1.98%         | 196          | 4         | 2.04%         | 1.03 [0.24-4.35]     | 0.972    | 1.000   |
| ZNF592  | 101         | 1         | 0.99%         | 196          | 6         | 3.06%         | 3.16 [0.53-18.88]    | 0.290    | 0.650   |
| ZNF597  | 101         | 5         | 4.95%         | 196          | 4         | 2.04%         | 0.40 [0.13-1.23]     | 0.179    | 0.535   |
| ZNF598  | 101         | 6         | 5.94%         | 196          | 5         | 2.55%         | 0.41 [0.15-1.15]     | 0.154    | 0.535   |
| ZNF613  | 101         | 1         | 0.99%         | 196          | 4         | 2.04%         | 2.08 [0.33-13.25]    | 0.514    | 0.805   |
| ZNF614  | 101         | 1         | 0.99%         | 196          | 4         | 2.04%         | 2.08 [0.33-13.25]    | 0.514    | 0.805   |
| ZNF615  | 101         | 1         | 0.99%         | 196          | 4         | 2.04%         | 2.08 [0.33-13.25]    | 0.514    | 0.805   |
| ZNF623  | 101         | 16        | 15.84%        | 196          | 51        | 26.02%        | 1.87 [1.11-3.15]     | 4.89E-02 | 0.507   |
| ZNF628  | 101         | 2         | 1.98%         | 196          | 4         | 2.04%         | 1.03 [0.24-4.35]     | 0.972    | 1.000   |
| ZNF629  | 101         | 4         | 3.96%         | 196          | 5         | 2.55%         | 0.63 [0.21-1.95]     | 0.505    | 0.805   |
| ZNF639  | 101         | 4         | 3.96%         | 196          | 2         | 1.02%         | 0.25 [0.059-1.05]    | 0.113    | 0.511   |
| ZNF646  | 101         | 4         | 3.96%         | 196          | 6         | 3.06%         | 0.77 [0.26-2.26]     | 0.685    | 0.943   |
| ZNF648  | 101         | 5         | 4.95%         | 196          | 18        | 9.18%         | 1.94 [0.82-4.58]     | 0.203    | 0.570   |
| ZNF649  | 101         | 1         | 0.99%         | 196          | 4         | 2.04%         | 2.08 [0.33-13.25]    | 0.514    | 0.805   |
| ZNF652  | 101         | 5         | 4.95%         | 196          | 20        | 10.20%        | 2.18 [0.93-5.10]     | 0.130    | 0.535   |
| ZNF665  | 101         | 1         | 0.99%         | 196          | 4         | 2.04%         | 2.08 [0.33-13.25]    | 0.514    | 0.805   |
| ZNF668  | 101         | 4         | 3.96%         | 196          | 6         | 3.06%         | 0.77 [0.26-2.26]     | 0.685    | 0.943   |
| ZNF669  | 101         | 5         | 4.95%         | 196          | 19        | 9.69%         | 2.06 [0.88-4.83]     | 0.163    | 0.535   |
| ZNF670  | 101         | 5         | 4.95%         | 196          | 19        | 9.69%         | 2.06 [0.88-4.83]     | 0.163    | 0.535   |
| ZNF672  | 101         | 6         | 5.94%         | 196          | 19        | 9.69%         | 1.70 [0.77-3.78]     | 0.274    | 0.643   |
| ZNF678  | 101         | 6         | 5.94%         | 196          | 20        | 10.20%        | 1.80 [0.81-3.98]     | 0.224    | 0.596   |
| ZNF687  | 101         | 6         | 5.94%         | 196          | 13        | 6.63%         | 1.12 [0.49-2.60]     | 0.817    | 1.000   |
| ZNF688  | 101         | 4         | 3.96%         | 196          | 5         | 2.55%         | 0.63 [0.21-1.95]     | 0.505    | 0.805   |
| ZNF689  | 101         | 4         | 3.96%         | 196          | 5         | 2.55%         | 0.63 [0.21-1.95]     | 0.505    | 0.805   |
| ZNF692  | 101         | 5         | 4.95%         | 196          | 19        | 9.69%         | 2.06 [0.88-4.83]     | 0.163    | 0.535   |
| ZNF695  | 101         | 5         | 4.95%         | 196          | 19        | 9.69%         | 2.06 [0.88-4.83]     | 0.163    | 0.535   |
| ZNF696  | 101         | 17        | 16.83%        | 196          | 51        | 26.02%        | 1.74 [1.04-2.90]     | 0.076    | 0.507   |
| ZNF703  | 101         | 11        | 10.89%        | 196          | 54        | 27.55%        | 3.11 [1.73-5.60]     | 1.48E-03 | 0.507   |
| ZNF704  | 101         | 17        | 16.83%        | 196          | 49        | 25.00%        | 1.65 [0.98-2.76]     | 0.111    | 0.511   |
| ZNF706  | 101         | 16        | 15.84%        | 196          | 57        | 29.08%        | 2.18 [1.30-3.66]     | 1.33E-02 | 0.507   |
| ZNF707  | 101         | 17        | 16.83%        | 196          | 51        | 26.02%        | 1.74 [1.04-2.90]     | 0.076    | 0.507   |
| ZNF710  | 101         | 1         | 0.99%         | 196          | 8         | 4.08%         | 4.26 [0.73-24.65]    | 0.175    | 0.535   |
| ZNF720  | 101         | 4         | 3.96%         | 196          | 4         | 2.04%         | 0.51 [0.16-1.65]     | 0.342    | 0.716   |
| ZNF747  | 101         | 4         | 3.96%         | 196          | 5         | 2.55%         | 0.63 [0.21-1.95]     | 0.505    | 0.805   |
| ZNF750  | 101         | 2         | 1.98%         | 196          | 14        | 7.14%         | 3.81 [1.08-13.43]    | 0.081    | 0.507   |
| ZNF75A  | 101         | 5         | 4.95%         | 196          | 4         | 2.04%         | 0.40 [0.13-1.23]     | 0.179    | 0.535   |
| ZNF764  | 101         | 4         | 3.96%         | 196          | 5         | 2.55%         | 0.63 [0.21-1.95]     | 0.505    | 0.805   |
| ZNF768  | 101         | 4         | 3.96%         | 196          | 5         | 2.55%         | 0.63 [0.21-1.95]     | 0.505    | 0.805   |
| ZNF771  | 101         | 4         | 3.96%         | 196          | 5         | 2.55%         | 0.63 [0.21-1.95]     | 0.505    | 0.805   |
| ZNF774  | 101         | 2         | 1.98%         | 196          | 6         | 3.06%         | 1.56 [0.40-6.08]     | 0.589    | 0.869   |
| ZNF784  | 101         | 2         | 1.98%         | 196          | 4         | 2.04%         | 1.03 [0.24-4.35]     | 0.972    | 1.000   |
| ZNF785  | 101         | 4         | 3.96%         | 196          | 5         | 2.55%         | 0.63 [0.21-1.95]     | 0.505    | 0.805   |
| ZNF7    | 101         | 17        | 16.83%        | 196          | 49        | 25.00%        | 1.65 [0.98-2.76]     | 0.111    | 0.511   |
| ZNF830  | 101         | 1         | 0.99%         | 196          | 5         | 2.55%         | 2.62 [0.43-16.05]    | 0.383    | 0.750   |
| ZNF831  | 101         | 8         | 7.92%         | 196          | 15        | 7.65%         | 0.96 [0.46-2.04]     | 0.935    | 1.000   |



| Symbol         | CINSARC Low |           |               | CINSARC High |           |               | CINSARC High vs. Low |          |         |
|----------------|-------------|-----------|---------------|--------------|-----------|---------------|----------------------|----------|---------|
|                | N tested    | N altered | Fq alteration | N tested     | N altered | Fq alteration | OR [95%CI]           | p-value* | q-value |
| <i>ZNF843</i>  | 101         | 4         | 3.96%         | 196          | 4         | 2.04%         | 0.51 [0.16-1.65]     | 0.342    | 0.716   |
| <i>ZNFX1</i>   | 101         | 7         | 6.93%         | 196          | 7         | 3.57%         | 0.50 [0.20-1.23]     | 0.203    | 0.570   |
| <i>ZNHIT3</i>  | 101         | 2         | 1.98%         | 196          | 6         | 3.06%         | 1.56 [0.40-6.08]     | 0.589    | 0.869   |
| <i>ZNRF2</i>   | 101         | 0         | 0.00%         | 196          | 7         | 3.57%         | 3.2e+07 [0e+00-Inf]  | 0.992    | 1.000   |
| <i>ZP2</i>     | 101         | 5         | 4.95%         | 196          | 2         | 1.02%         | 0.20 [0.049-0.80]    | 0.056    | 0.507   |
| <i>ZP4</i>     | 101         | 5         | 4.95%         | 196          | 19        | 9.69%         | 2.06 [0.88-4.83]     | 0.163    | 0.535   |
| <i>ZPBP2</i>   | 101         | 6         | 5.94%         | 196          | 12        | 6.12%         | 1.03 [0.44-2.41]     | 0.950    | 1.000   |
| <i>ZSCAN10</i> | 101         | 6         | 5.94%         | 196          | 4         | 2.04%         | 0.33 [0.11-0.97]     | 0.092    | 0.507   |
| <i>ZSCAN2</i>  | 101         | 1         | 0.99%         | 196          | 5         | 2.55%         | 2.62 [0.43-16.05]    | 0.383    | 0.750   |
| <i>ZSWIM1</i>  | 101         | 5         | 4.95%         | 196          | 4         | 2.04%         | 0.40 [0.13-1.23]     | 0.179    | 0.535   |
| <i>ZSWIM3</i>  | 101         | 5         | 4.95%         | 196          | 4         | 2.04%         | 0.40 [0.13-1.23]     | 0.179    | 0.535   |

**Supplementary Table 6: Comparison of frequency of homozygous deletions among the 3,842 genes altered in at least 5/297 tested samples (TCGA) between the two CINSARC classes in Luminal B breast cancers.**

| Symbol          | CINSARC Low |           |               | CINSARC High |           |               | CINSARC High vs. Low |          |         |
|-----------------|-------------|-----------|---------------|--------------|-----------|---------------|----------------------|----------|---------|
|                 | N tested    | N altered | Fq alteration | N tested     | N altered | Fq alteration | OR [95%CI]           | p-value* | q-value |
| <i>RBFOX1</i>   | 101         | 0         | 0.00%         | 196          | 0         | 0.00%         | 1.00 [0e+00-Inf]     | 1.000    | 1.000   |
| <i>AANAT</i>    | 101         | 0         | 0.00%         | 196          | 0         | 0.00%         | 1.00 [0e+00-Inf]     | 1.000    | 1.000   |
| <i>AATF</i>     | 101         | 0         | 0.00%         | 196          | 0         | 0.00%         | 1.00 [0e+00-Inf]     | 1.000    | 1.000   |
| <i>AATK</i>     | 101         | 0         | 0.00%         | 196          | 0         | 0.00%         | 1.00 [0e+00-Inf]     | 1.000    | 1.000   |
| <i>ABAT</i>     | 101         | 0         | 0.00%         | 196          | 0         | 0.00%         | 1.00 [0e+00-Inf]     | 1.000    | 1.000   |
| <i>ABCA10</i>   | 101         | 0         | 0.00%         | 196          | 0         | 0.00%         | 1.00 [0e+00-Inf]     | 1.000    | 1.000   |
| <i>ABCA17P</i>  | 101         | 0         | 0.00%         | 196          | 0         | 0.00%         | 1.00 [0e+00-Inf]     | 1.000    | 1.000   |
| <i>ABCA3</i>    | 101         | 0         | 0.00%         | 196          | 0         | 0.00%         | 1.00 [0e+00-Inf]     | 1.000    | 1.000   |
| <i>ABCA5</i>    | 101         | 0         | 0.00%         | 196          | 0         | 0.00%         | 1.00 [0e+00-Inf]     | 1.000    | 1.000   |
| <i>ABCA6</i>    | 101         | 0         | 0.00%         | 196          | 0         | 0.00%         | 1.00 [0e+00-Inf]     | 1.000    | 1.000   |
| <i>ABCA8</i>    | 101         | 0         | 0.00%         | 196          | 0         | 0.00%         | 1.00 [0e+00-Inf]     | 1.000    | 1.000   |
| <i>ABCA9</i>    | 101         | 0         | 0.00%         | 196          | 0         | 0.00%         | 1.00 [0e+00-Inf]     | 1.000    | 1.000   |
| <i>ABCB10</i>   | 101         | 0         | 0.00%         | 196          | 0         | 0.00%         | 1.00 [0e+00-Inf]     | 1.000    | 1.000   |
| <i>ABCB5</i>    | 101         | 0         | 0.00%         | 196          | 0         | 0.00%         | 1.00 [0e+00-Inf]     | 1.000    | 1.000   |
| <i>ABCC12</i>   | 101         | 0         | 0.00%         | 196          | 0         | 0.00%         | 1.00 [0e+00-Inf]     | 1.000    | 1.000   |
| <i>ABCC1</i>    | 101         | 0         | 0.00%         | 196          | 0         | 0.00%         | 1.00 [0e+00-Inf]     | 1.000    | 1.000   |
| <i>ABCC3</i>    | 101         | 0         | 0.00%         | 196          | 0         | 0.00%         | 1.00 [0e+00-Inf]     | 1.000    | 1.000   |
| <i>ABCC5</i>    | 101         | 0         | 0.00%         | 196          | 0         | 0.00%         | 1.00 [0e+00-Inf]     | 1.000    | 1.000   |
| <i>ABCC6P1</i>  | 101         | 0         | 0.00%         | 196          | 0         | 0.00%         | 1.00 [0e+00-Inf]     | 1.000    | 1.000   |
| <i>ABCC6P2</i>  | 101         | 0         | 0.00%         | 196          | 0         | 0.00%         | 1.00 [0e+00-Inf]     | 1.000    | 1.000   |
| <i>ABCC6</i>    | 101         | 0         | 0.00%         | 196          | 0         | 0.00%         | 1.00 [0e+00-Inf]     | 1.000    | 1.000   |
| <i>ABCC8</i>    | 101         | 0         | 0.00%         | 196          | 0         | 0.00%         | 1.00 [0e+00-Inf]     | 1.000    | 1.000   |
| <i>ABCF3</i>    | 101         | 0         | 0.00%         | 196          | 0         | 0.00%         | 1.00 [0e+00-Inf]     | 1.000    | 1.000   |
| <i>ABHD15</i>   | 101         | 0         | 0.00%         | 196          | 0         | 0.00%         | 1.00 [0e+00-Inf]     | 1.000    | 1.000   |
| <i>ABHD2</i>    | 101         | 0         | 0.00%         | 196          | 0         | 0.00%         | 1.00 [0e+00-Inf]     | 1.000    | 1.000   |
| <i>ABI3</i>     | 101         | 0         | 0.00%         | 196          | 0         | 0.00%         | 1.00 [0e+00-Inf]     | 1.000    | 1.000   |
| <i>ABL2</i>     | 101         | 0         | 0.00%         | 196          | 0         | 0.00%         | 1.00 [0e+00-Inf]     | 1.000    | 1.000   |
| <i>ABRA</i>     | 101         | 0         | 0.00%         | 196          | 0         | 0.00%         | 1.00 [0e+00-Inf]     | 1.000    | 1.000   |
| <i>ACACA</i>    | 101         | 0         | 0.00%         | 196          | 0         | 0.00%         | 1.00 [0e+00-Inf]     | 1.000    | 1.000   |
| <i>ACAN</i>     | 101         | 0         | 0.00%         | 196          | 0         | 0.00%         | 1.00 [0e+00-Inf]     | 1.000    | 1.000   |
| <i>ACAP2</i>    | 101         | 0         | 0.00%         | 196          | 0         | 0.00%         | 1.00 [0e+00-Inf]     | 1.000    | 1.000   |
| <i>ACBD3</i>    | 101         | 0         | 0.00%         | 196          | 0         | 0.00%         | 1.00 [0e+00-Inf]     | 1.000    | 1.000   |
| <i>ACBD6</i>    | 101         | 0         | 0.00%         | 196          | 0         | 0.00%         | 1.00 [0e+00-Inf]     | 1.000    | 1.000   |
| <i>ACER3</i>    | 101         | 0         | 0.00%         | 196          | 0         | 0.00%         | 1.00 [0e+00-Inf]     | 1.000    | 1.000   |
| <i>ACE</i>      | 101         | 0         | 0.00%         | 196          | 0         | 0.00%         | 1.00 [0e+00-Inf]     | 1.000    | 1.000   |
| <i>ACIN1</i>    | 101         | 0         | 0.00%         | 196          | 0         | 0.00%         | 1.00 [0e+00-Inf]     | 1.000    | 1.000   |
| <i>ACOT1</i>    | 101         | 3         | 2.97%         | 196          | 4         | 2.04%         | 0.68 [0.19-2.43]     | 0.619    | 1.000   |
| <i>ACOT8</i>    | 101         | 0         | 0.00%         | 196          | 0         | 0.00%         | 1.00 [0e+00-Inf]     | 1.000    | 1.000   |
| <i>ACOX1</i>    | 101         | 0         | 0.00%         | 196          | 0         | 0.00%         | 1.00 [0e+00-Inf]     | 1.000    | 1.000   |
| <i>ACP6</i>     | 101         | 0         | 0.00%         | 196          | 0         | 0.00%         | 1.00 [0e+00-Inf]     | 1.000    | 1.000   |
| <i>ACSF2</i>    | 101         | 0         | 0.00%         | 196          | 0         | 0.00%         | 1.00 [0e+00-Inf]     | 1.000    | 1.000   |
| <i>ACSM1</i>    | 101         | 0         | 0.00%         | 196          | 0         | 0.00%         | 1.00 [0e+00-Inf]     | 1.000    | 1.000   |
| <i>ACSM2A</i>   | 101         | 0         | 0.00%         | 196          | 0         | 0.00%         | 1.00 [0e+00-Inf]     | 1.000    | 1.000   |
| <i>ACSM2B</i>   | 101         | 0         | 0.00%         | 196          | 0         | 0.00%         | 1.00 [0e+00-Inf]     | 1.000    | 1.000   |
| <i>ACSM3</i>    | 101         | 0         | 0.00%         | 196          | 0         | 0.00%         | 1.00 [0e+00-Inf]     | 1.000    | 1.000   |
| <i>ACSM5</i>    | 101         | 0         | 0.00%         | 196          | 0         | 0.00%         | 1.00 [0e+00-Inf]     | 1.000    | 1.000   |
| <i>ACSS2</i>    | 101         | 0         | 0.00%         | 196          | 0         | 0.00%         | 1.00 [0e+00-Inf]     | 1.000    | 1.000   |
| <i>ACSS3</i>    | 101         | 0         | 0.00%         | 196          | 0         | 0.00%         | 1.00 [0e+00-Inf]     | 1.000    | 1.000   |
| <i>ACTA1</i>    | 101         | 0         | 0.00%         | 196          | 0         | 0.00%         | 1.00 [0e+00-Inf]     | 1.000    | 1.000   |
| <i>ACTG1</i>    | 101         | 0         | 0.00%         | 196          | 0         | 0.00%         | 1.00 [0e+00-Inf]     | 1.000    | 1.000   |
| <i>ACTL6A</i>   | 101         | 0         | 0.00%         | 196          | 0         | 0.00%         | 1.00 [0e+00-Inf]     | 1.000    | 1.000   |
| <i>ACTN2</i>    | 101         | 0         | 0.00%         | 196          | 0         | 0.00%         | 1.00 [0e+00-Inf]     | 1.000    | 1.000   |
| <i>ACTN3</i>    | 101         | 0         | 0.00%         | 196          | 0         | 0.00%         | 1.00 [0e+00-Inf]     | 1.000    | 1.000   |
| <i>ACTR5</i>    | 101         | 0         | 0.00%         | 196          | 0         | 0.00%         | 1.00 [0e+00-Inf]     | 1.000    | 1.000   |
| <i>ACY3</i>     | 101         | 0         | 0.00%         | 196          | 0         | 0.00%         | 1.00 [0e+00-Inf]     | 1.000    | 1.000   |
| <i>ADAM15</i>   | 101         | 0         | 0.00%         | 196          | 0         | 0.00%         | 1.00 [0e+00-Inf]     | 1.000    | 1.000   |
| <i>ADAM18</i>   | 101         | 0         | 0.00%         | 196          | 0         | 0.00%         | 1.00 [0e+00-Inf]     | 1.000    | 1.000   |
| <i>ADAM2</i>    | 101         | 0         | 0.00%         | 196          | 0         | 0.00%         | 1.00 [0e+00-Inf]     | 1.000    | 1.000   |
| <i>ADAM30</i>   | 101         | 0         | 0.00%         | 196          | 0         | 0.00%         | 1.00 [0e+00-Inf]     | 1.000    | 1.000   |
| <i>ADAM32</i>   | 101         | 0         | 0.00%         | 196          | 0         | 0.00%         | 1.00 [0e+00-Inf]     | 1.000    | 1.000   |
| <i>ADAM3A</i>   | 101         | 11        | 10.89%        | 196          | 11        | 5.61%         | 0.49 [0.23-1.01]     | 0.106    | 1.000   |
| <i>ADAM5</i>    | 101         | 0         | 0.00%         | 196          | 0         | 0.00%         | 1.00 [0e+00-Inf]     | 1.000    | 1.000   |
| <i>ADAM9</i>    | 101         | 0         | 0.00%         | 196          | 0         | 0.00%         | 1.00 [0e+00-Inf]     | 1.000    | 1.000   |
| <i>ADAMTS4</i>  | 101         | 0         | 0.00%         | 196          | 0         | 0.00%         | 1.00 [0e+00-Inf]     | 1.000    | 1.000   |
| <i>ADAMTSL4</i> | 101         | 0         | 0.00%         | 196          | 0         | 0.00%         | 1.00 [0e+00-Inf]     | 1.000    | 1.000   |
| <i>ADAP2</i>    | 101         | 0         | 0.00%         | 196          | 0         | 0.00%         | 1.00 [0e+00-Inf]     | 1.000    | 1.000   |
| <i>ADAR</i>     | 101         | 0         | 0.00%         | 196          | 0         | 0.00%         | 1.00 [0e+00-Inf]     | 1.000    | 1.000   |
| <i>ADA</i>      | 101         | 0         | 0.00%         | 196          | 0         | 0.00%         | 1.00 [0e+00-Inf]     | 1.000    | 1.000   |

| Symbol     | CINSARC Low |           |               | CINSARC High |           |               | CINSARC High vs. Low |          |         |
|------------|-------------|-----------|---------------|--------------|-----------|---------------|----------------------|----------|---------|
|            | N tested    | N altered | Fq alteration | N tested     | N altered | Fq alteration | OR [95%CI]           | p-value* | q-value |
| ADCK2      | 101         | 0         | 0.00%         | 196          | 0         | 0.00%         | 1.00 [0e+00-Inf]     | 1.000    | 1.000   |
| ADCK5      | 101         | 0         | 0.00%         | 196          | 0         | 0.00%         | 1.00 [0e+00-Inf]     | 1.000    | 1.000   |
| ADCY10     | 101         | 0         | 0.00%         | 196          | 0         | 0.00%         | 1.00 [0e+00-Inf]     | 1.000    | 1.000   |
| ADCY8      | 101         | 0         | 0.00%         | 196          | 0         | 0.00%         | 1.00 [0e+00-Inf]     | 1.000    | 1.000   |
| ADCY9      | 101         | 0         | 0.00%         | 196          | 0         | 0.00%         | 1.00 [0e+00-Inf]     | 1.000    | 1.000   |
| ADCYAP1R1  | 101         | 0         | 0.00%         | 196          | 0         | 0.00%         | 1.00 [0e+00-Inf]     | 1.000    | 1.000   |
| ADHFE1     | 101         | 0         | 0.00%         | 196          | 0         | 0.00%         | 1.00 [0e+00-Inf]     | 1.000    | 1.000   |
| ADIG       | 101         | 0         | 0.00%         | 196          | 0         | 0.00%         | 1.00 [0e+00-Inf]     | 1.000    | 1.000   |
| ADIPOR1    | 101         | 0         | 0.00%         | 196          | 0         | 0.00%         | 1.00 [0e+00-Inf]     | 1.000    | 1.000   |
| ADK        | 101         | 0         | 0.00%         | 196          | 0         | 0.00%         | 1.00 [0e+00-Inf]     | 1.000    | 1.000   |
| ADNP       | 101         | 0         | 0.00%         | 196          | 0         | 0.00%         | 1.00 [0e+00-Inf]     | 1.000    | 1.000   |
| ADORA1     | 101         | 0         | 0.00%         | 196          | 0         | 0.00%         | 1.00 [0e+00-Inf]     | 1.000    | 1.000   |
| ADRB3      | 101         | 0         | 0.00%         | 196          | 0         | 0.00%         | 1.00 [0e+00-Inf]     | 1.000    | 1.000   |
| ADRM1      | 101         | 0         | 0.00%         | 196          | 0         | 0.00%         | 1.00 [0e+00-Inf]     | 1.000    | 1.000   |
| ADSS       | 101         | 0         | 0.00%         | 196          | 0         | 0.00%         | 1.00 [0e+00-Inf]     | 1.000    | 1.000   |
| AEN        | 101         | 0         | 0.00%         | 196          | 0         | 0.00%         | 1.00 [0e+00-Inf]     | 1.000    | 1.000   |
| AFMID      | 101         | 0         | 0.00%         | 196          | 0         | 0.00%         | 1.00 [0e+00-Inf]     | 1.000    | 1.000   |
| AFM        | 101         | 0         | 0.00%         | 196          | 0         | 0.00%         | 1.00 [0e+00-Inf]     | 1.000    | 1.000   |
| AFP        | 101         | 0         | 0.00%         | 196          | 0         | 0.00%         | 1.00 [0e+00-Inf]     | 1.000    | 1.000   |
| AGAP2      | 101         | 0         | 0.00%         | 196          | 0         | 0.00%         | 1.00 [0e+00-Inf]     | 1.000    | 1.000   |
| AGAP5      | 101         | 0         | 0.00%         | 196          | 0         | 0.00%         | 1.00 [0e+00-Inf]     | 1.000    | 1.000   |
| AGBL1      | 101         | 0         | 0.00%         | 196          | 0         | 0.00%         | 1.00 [0e+00-Inf]     | 1.000    | 1.000   |
| AGT        | 101         | 0         | 0.00%         | 196          | 0         | 0.00%         | 1.00 [0e+00-Inf]     | 1.000    | 1.000   |
| AHCTF1     | 101         | 0         | 0.00%         | 196          | 0         | 0.00%         | 1.00 [0e+00-Inf]     | 1.000    | 1.000   |
| AHSP       | 101         | 0         | 0.00%         | 196          | 0         | 0.00%         | 1.00 [0e+00-Inf]     | 1.000    | 1.000   |
| AIDA       | 101         | 0         | 0.00%         | 196          | 0         | 0.00%         | 1.00 [0e+00-Inf]     | 1.000    | 1.000   |
| AIM2       | 101         | 0         | 0.00%         | 196          | 0         | 0.00%         | 1.00 [0e+00-Inf]     | 1.000    | 1.000   |
| AIP        | 101         | 0         | 0.00%         | 196          | 0         | 0.00%         | 1.00 [0e+00-Inf]     | 1.000    | 1.000   |
| AKAP10     | 101         | 0         | 0.00%         | 196          | 0         | 0.00%         | 1.00 [0e+00-Inf]     | 1.000    | 1.000   |
| AKAP13     | 101         | 0         | 0.00%         | 196          | 0         | 0.00%         | 1.00 [0e+00-Inf]     | 1.000    | 1.000   |
| AKAP1      | 101         | 0         | 0.00%         | 196          | 0         | 0.00%         | 1.00 [0e+00-Inf]     | 1.000    | 1.000   |
| AKAP6      | 101         | 0         | 0.00%         | 196          | 0         | 0.00%         | 1.00 [0e+00-Inf]     | 1.000    | 1.000   |
| AKT3       | 101         | 0         | 0.00%         | 196          | 0         | 0.00%         | 1.00 [0e+00-Inf]     | 1.000    | 1.000   |
| ALB        | 101         | 0         | 0.00%         | 196          | 0         | 0.00%         | 1.00 [0e+00-Inf]     | 1.000    | 1.000   |
| ALDH3A1    | 101         | 0         | 0.00%         | 196          | 0         | 0.00%         | 1.00 [0e+00-Inf]     | 1.000    | 1.000   |
| ALDH3A2    | 101         | 0         | 0.00%         | 196          | 0         | 0.00%         | 1.00 [0e+00-Inf]     | 1.000    | 1.000   |
| ALDH3B1    | 101         | 0         | 0.00%         | 196          | 0         | 0.00%         | 1.00 [0e+00-Inf]     | 1.000    | 1.000   |
| ALDH3B2    | 101         | 0         | 0.00%         | 196          | 0         | 0.00%         | 1.00 [0e+00-Inf]     | 1.000    | 1.000   |
| ALDH9A1    | 101         | 0         | 0.00%         | 196          | 0         | 0.00%         | 1.00 [0e+00-Inf]     | 1.000    | 1.000   |
| ALDOA      | 101         | 0         | 0.00%         | 196          | 0         | 0.00%         | 1.00 [0e+00-Inf]     | 1.000    | 1.000   |
| ALDOC      | 101         | 0         | 0.00%         | 196          | 0         | 0.00%         | 1.00 [0e+00-Inf]     | 1.000    | 1.000   |
| ALG1       | 101         | 0         | 0.00%         | 196          | 0         | 0.00%         | 1.00 [0e+00-Inf]     | 1.000    | 1.000   |
| ALG3       | 101         | 0         | 0.00%         | 196          | 0         | 0.00%         | 1.00 [0e+00-Inf]     | 1.000    | 1.000   |
| ALG8       | 101         | 0         | 0.00%         | 196          | 0         | 0.00%         | 1.00 [0e+00-Inf]     | 1.000    | 1.000   |
| ALPK3      | 101         | 0         | 0.00%         | 196          | 0         | 0.00%         | 1.00 [0e+00-Inf]     | 1.000    | 1.000   |
| CCL18      | 101         | 0         | 0.00%         | 196          | 0         | 0.00%         | 1.00 [0e+00-Inf]     | 1.000    | 1.000   |
| AMDHD2     | 101         | 0         | 0.00%         | 196          | 0         | 0.00%         | 1.00 [0e+00-Inf]     | 1.000    | 1.000   |
| AMELY      | 101         | 64        | 63.37%        | 196          | 115       | 58.67%        | 0.82 [0.54-1.24]     | 0.434    | 1.000   |
| AMZ2P1     | 101         | 0         | 0.00%         | 196          | 0         | 0.00%         | 1.00 [0e+00-Inf]     | 1.000    | 1.000   |
| AMZ2       | 101         | 0         | 0.00%         | 196          | 0         | 0.00%         | 1.00 [0e+00-Inf]     | 1.000    | 1.000   |
| ANAPC11    | 101         | 0         | 0.00%         | 196          | 0         | 0.00%         | 1.00 [0e+00-Inf]     | 1.000    | 1.000   |
| ANGEL2     | 101         | 0         | 0.00%         | 196          | 0         | 0.00%         | 1.00 [0e+00-Inf]     | 1.000    | 1.000   |
| ANGPT1     | 101         | 0         | 0.00%         | 196          | 0         | 0.00%         | 1.00 [0e+00-Inf]     | 1.000    | 1.000   |
| ANGPTL1    | 101         | 0         | 0.00%         | 196          | 0         | 0.00%         | 1.00 [0e+00-Inf]     | 1.000    | 1.000   |
| ANK1       | 101         | 0         | 0.00%         | 196          | 0         | 0.00%         | 1.00 [0e+00-Inf]     | 1.000    | 1.000   |
| ANK3       | 101         | 0         | 0.00%         | 196          | 0         | 0.00%         | 1.00 [0e+00-Inf]     | 1.000    | 1.000   |
| ANKFN1     | 101         | 0         | 0.00%         | 196          | 0         | 0.00%         | 1.00 [0e+00-Inf]     | 1.000    | 1.000   |
| ANKRD13B   | 101         | 0         | 0.00%         | 196          | 0         | 0.00%         | 1.00 [0e+00-Inf]     | 1.000    | 1.000   |
| ANKRD13D   | 101         | 0         | 0.00%         | 196          | 0         | 0.00%         | 1.00 [0e+00-Inf]     | 1.000    | 1.000   |
| ANKRD17    | 101         | 0         | 0.00%         | 196          | 0         | 0.00%         | 1.00 [0e+00-Inf]     | 1.000    | 1.000   |
| ANKRD34A   | 101         | 0         | 0.00%         | 196          | 0         | 0.00%         | 1.00 [0e+00-Inf]     | 1.000    | 1.000   |
| ANKRD35    | 101         | 0         | 0.00%         | 196          | 0         | 0.00%         | 1.00 [0e+00-Inf]     | 1.000    | 1.000   |
| ANKRD36BP1 | 101         | 0         | 0.00%         | 196          | 0         | 0.00%         | 1.00 [0e+00-Inf]     | 1.000    | 1.000   |
| ANKRD40    | 101         | 0         | 0.00%         | 196          | 0         | 0.00%         | 1.00 [0e+00-Inf]     | 1.000    | 1.000   |
| ANKRD45    | 101         | 0         | 0.00%         | 196          | 0         | 0.00%         | 1.00 [0e+00-Inf]     | 1.000    | 1.000   |
| ANKRD46    | 101         | 0         | 0.00%         | 196          | 0         | 0.00%         | 1.00 [0e+00-Inf]     | 1.000    | 1.000   |
| ANKS3      | 101         | 0         | 0.00%         | 196          | 0         | 0.00%         | 1.00 [0e+00-Inf]     | 1.000    | 1.000   |
| ANKS4B     | 101         | 0         | 0.00%         | 196          | 0         | 0.00%         | 1.00 [0e+00-Inf]     | 1.000    | 1.000   |
| ANO1       | 101         | 0         | 0.00%         | 196          | 0         | 0.00%         | 1.00 [0e+00-Inf]     | 1.000    | 1.000   |
| ANO5       | 101         | 0         | 0.00%         | 196          | 0         | 0.00%         | 1.00 [0e+00-Inf]     | 1.000    | 1.000   |
| ANP32E     | 101         | 0         | 0.00%         | 196          | 0         | 0.00%         | 1.00 [0e+00-Inf]     | 1.000    | 1.000   |



| Symbol    | CINSARC Low |           |               | CINSARC High |           |               | CINSARC High vs. Low |          |         |
|-----------|-------------|-----------|---------------|--------------|-----------|---------------|----------------------|----------|---------|
|           | N tested    | N altered | Fq alteration | N tested     | N altered | Fq alteration | OR [95%CI]           | p-value* | q-value |
| ASTN1     | 101         | 0         | 0.00%         | 196          | 0         | 0.00%         | 1.00 [0e+00-Inf]     | 1.000    | 1.000   |
| ATAD2     | 101         | 0         | 0.00%         | 196          | 0         | 0.00%         | 1.00 [0e+00-Inf]     | 1.000    | 1.000   |
| ATAD5     | 101         | 0         | 0.00%         | 196          | 0         | 0.00%         | 1.00 [0e+00-Inf]     | 1.000    | 1.000   |
| ATF3      | 101         | 0         | 0.00%         | 196          | 0         | 0.00%         | 1.00 [0e+00-Inf]     | 1.000    | 1.000   |
| ATF6      | 101         | 0         | 0.00%         | 196          | 0         | 0.00%         | 1.00 [0e+00-Inf]     | 1.000    | 1.000   |
| ATF7IP2   | 101         | 0         | 0.00%         | 196          | 0         | 0.00%         | 1.00 [0e+00-Inf]     | 1.000    | 1.000   |
| ATG16L2   | 101         | 0         | 0.00%         | 196          | 0         | 0.00%         | 1.00 [0e+00-Inf]     | 1.000    | 1.000   |
| ATG5      | 101         | 0         | 0.00%         | 196          | 0         | 0.00%         | 1.00 [0e+00-Inf]     | 1.000    | 1.000   |
| ATP11B    | 101         | 0         | 0.00%         | 196          | 0         | 0.00%         | 1.00 [0e+00-Inf]     | 1.000    | 1.000   |
| ATP13A3   | 101         | 0         | 0.00%         | 196          | 0         | 0.00%         | 1.00 [0e+00-Inf]     | 1.000    | 1.000   |
| ATP13A4   | 101         | 0         | 0.00%         | 196          | 0         | 0.00%         | 1.00 [0e+00-Inf]     | 1.000    | 1.000   |
| ATP13A5   | 101         | 0         | 0.00%         | 196          | 0         | 0.00%         | 1.00 [0e+00-Inf]     | 1.000    | 1.000   |
| ATP1A2    | 101         | 0         | 0.00%         | 196          | 0         | 0.00%         | 1.00 [0e+00-Inf]     | 1.000    | 1.000   |
| ATP1A4    | 101         | 0         | 0.00%         | 196          | 0         | 0.00%         | 1.00 [0e+00-Inf]     | 1.000    | 1.000   |
| ATP1B1    | 101         | 0         | 0.00%         | 196          | 0         | 0.00%         | 1.00 [0e+00-Inf]     | 1.000    | 1.000   |
| ATP2A1    | 101         | 0         | 0.00%         | 196          | 0         | 0.00%         | 1.00 [0e+00-Inf]     | 1.000    | 1.000   |
| ATP2B4    | 101         | 0         | 0.00%         | 196          | 0         | 0.00%         | 1.00 [0e+00-Inf]     | 1.000    | 1.000   |
| ATP6V0C   | 101         | 0         | 0.00%         | 196          | 0         | 0.00%         | 1.00 [0e+00-Inf]     | 1.000    | 1.000   |
| ATP6V0D2  | 101         | 0         | 0.00%         | 196          | 0         | 0.00%         | 1.00 [0e+00-Inf]     | 1.000    | 1.000   |
| ATP6V1C1  | 101         | 0         | 0.00%         | 196          | 0         | 0.00%         | 1.00 [0e+00-Inf]     | 1.000    | 1.000   |
| ATP6V1G3  | 101         | 0         | 0.00%         | 196          | 0         | 0.00%         | 1.00 [0e+00-Inf]     | 1.000    | 1.000   |
| ATP6V1H   | 101         | 0         | 0.00%         | 196          | 0         | 0.00%         | 1.00 [0e+00-Inf]     | 1.000    | 1.000   |
| ATP8B2    | 101         | 0         | 0.00%         | 196          | 0         | 0.00%         | 1.00 [0e+00-Inf]     | 1.000    | 1.000   |
| ATP9A     | 101         | 0         | 0.00%         | 196          | 0         | 0.00%         | 1.00 [0e+00-Inf]     | 1.000    | 1.000   |
| ATXN2L    | 101         | 0         | 0.00%         | 196          | 0         | 0.00%         | 1.00 [0e+00-Inf]     | 1.000    | 1.000   |
| ATXN7L3B  | 101         | 0         | 0.00%         | 196          | 0         | 0.00%         | 1.00 [0e+00-Inf]     | 1.000    | 1.000   |
| AURKA     | 101         | 0         | 0.00%         | 196          | 0         | 0.00%         | 1.00 [0e+00-Inf]     | 1.000    | 1.000   |
| AVIL      | 101         | 0         | 0.00%         | 196          | 0         | 0.00%         | 1.00 [0e+00-Inf]     | 1.000    | 1.000   |
| AVL9      | 101         | 0         | 0.00%         | 196          | 0         | 0.00%         | 1.00 [0e+00-Inf]     | 1.000    | 1.000   |
| AVPR1A    | 101         | 0         | 0.00%         | 196          | 0         | 0.00%         | 1.00 [0e+00-Inf]     | 1.000    | 1.000   |
| AVPR1B    | 101         | 0         | 0.00%         | 196          | 0         | 0.00%         | 1.00 [0e+00-Inf]     | 1.000    | 1.000   |
| AXIN1     | 101         | 0         | 0.00%         | 196          | 0         | 0.00%         | 1.00 [0e+00-Inf]     | 1.000    | 1.000   |
| AXIN2     | 101         | 0         | 0.00%         | 196          | 0         | 0.00%         | 1.00 [0e+00-Inf]     | 1.000    | 1.000   |
| AZIN1     | 101         | 0         | 0.00%         | 196          | 0         | 0.00%         | 1.00 [0e+00-Inf]     | 1.000    | 1.000   |
| B3GALNT2  | 101         | 0         | 0.00%         | 196          | 0         | 0.00%         | 1.00 [0e+00-Inf]     | 1.000    | 1.000   |
| B3GALT2   | 101         | 0         | 0.00%         | 196          | 0         | 0.00%         | 1.00 [0e+00-Inf]     | 1.000    | 1.000   |
| B3GNT5    | 101         | 0         | 0.00%         | 196          | 0         | 0.00%         | 1.00 [0e+00-Inf]     | 1.000    | 1.000   |
| B3GNT6    | 101         | 0         | 0.00%         | 196          | 0         | 0.00%         | 1.00 [0e+00-Inf]     | 1.000    | 1.000   |
| B3GNTL1   | 101         | 0         | 0.00%         | 196          | 0         | 0.00%         | 1.00 [0e+00-Inf]     | 1.000    | 1.000   |
| B4GALNT2  | 101         | 0         | 0.00%         | 196          | 0         | 0.00%         | 1.00 [0e+00-Inf]     | 1.000    | 1.000   |
| B4GALT3   | 101         | 0         | 0.00%         | 196          | 0         | 0.00%         | 1.00 [0e+00-Inf]     | 1.000    | 1.000   |
| B4GALT5   | 101         | 0         | 0.00%         | 196          | 0         | 0.00%         | 1.00 [0e+00-Inf]     | 1.000    | 1.000   |
| B9D1      | 101         | 0         | 0.00%         | 196          | 0         | 0.00%         | 1.00 [0e+00-Inf]     | 1.000    | 1.000   |
| BAALC     | 101         | 0         | 0.00%         | 196          | 0         | 0.00%         | 1.00 [0e+00-Inf]     | 1.000    | 1.000   |
| BAG4      | 101         | 0         | 0.00%         | 196          | 0         | 0.00%         | 1.00 [0e+00-Inf]     | 1.000    | 1.000   |
| BAHCC1    | 101         | 0         | 0.00%         | 196          | 0         | 0.00%         | 1.00 [0e+00-Inf]     | 1.000    | 1.000   |
| BAIAP2    | 101         | 0         | 0.00%         | 196          | 0         | 0.00%         | 1.00 [0e+00-Inf]     | 1.000    | 1.000   |
| BAIAP3    | 101         | 0         | 0.00%         | 196          | 0         | 0.00%         | 1.00 [0e+00-Inf]     | 1.000    | 1.000   |
| PRRC2C    | 101         | 0         | 0.00%         | 196          | 0         | 0.00%         | 1.00 [0e+00-Inf]     | 1.000    | 1.000   |
| BATF3     | 101         | 0         | 0.00%         | 196          | 0         | 0.00%         | 1.00 [0e+00-Inf]     | 1.000    | 1.000   |
| BAZ1A     | 101         | 0         | 0.00%         | 196          | 0         | 0.00%         | 1.00 [0e+00-Inf]     | 1.000    | 1.000   |
| BBS10     | 101         | 0         | 0.00%         | 196          | 0         | 0.00%         | 1.00 [0e+00-Inf]     | 1.000    | 1.000   |
| BBS1      | 101         | 0         | 0.00%         | 196          | 0         | 0.00%         | 1.00 [0e+00-Inf]     | 1.000    | 1.000   |
| BBS9      | 101         | 0         | 0.00%         | 196          | 0         | 0.00%         | 1.00 [0e+00-Inf]     | 1.000    | 1.000   |
| BCAN      | 101         | 0         | 0.00%         | 196          | 0         | 0.00%         | 1.00 [0e+00-Inf]     | 1.000    | 1.000   |
| BCAR4     | 101         | 0         | 0.00%         | 196          | 0         | 0.00%         | 1.00 [0e+00-Inf]     | 1.000    | 1.000   |
| BCAS1     | 101         | 0         | 0.00%         | 196          | 0         | 0.00%         | 1.00 [0e+00-Inf]     | 1.000    | 1.000   |
| BCAS3     | 101         | 0         | 0.00%         | 196          | 0         | 0.00%         | 1.00 [0e+00-Inf]     | 1.000    | 1.000   |
| BCAS4     | 101         | 0         | 0.00%         | 196          | 0         | 0.00%         | 1.00 [0e+00-Inf]     | 1.000    | 1.000   |
| BCKDK     | 101         | 0         | 0.00%         | 196          | 0         | 0.00%         | 1.00 [0e+00-Inf]     | 1.000    | 1.000   |
| BCL2      | 101         | 0         | 0.00%         | 196          | 0         | 0.00%         | 1.00 [0e+00-Inf]     | 1.000    | 1.000   |
| BCL7C     | 101         | 0         | 0.00%         | 196          | 0         | 0.00%         | 1.00 [0e+00-Inf]     | 1.000    | 1.000   |
| NBEAP1    | 101         | 0         | 0.00%         | 196          | 0         | 0.00%         | 1.00 [0e+00-Inf]     | 1.000    | 1.000   |
| BCL9      | 101         | 0         | 0.00%         | 196          | 0         | 0.00%         | 1.00 [0e+00-Inf]     | 1.000    | 1.000   |
| BCORP1    | 101         | 64        | 63.37%        | 196          | 116       | 59.18%        | 0.84 [0.55-1.27]     | 0.485    | 1.000   |
| BDH1      | 101         | 0         | 0.00%         | 196          | 0         | 0.00%         | 1.00 [0e+00-Inf]     | 1.000    | 1.000   |
| BEND3     | 101         | 0         | 0.00%         | 196          | 0         | 0.00%         | 1.00 [0e+00-Inf]     | 1.000    | 1.000   |
| BEST3     | 101         | 0         | 0.00%         | 196          | 0         | 0.00%         | 1.00 [0e+00-Inf]     | 1.000    | 1.000   |
| LINC00293 | 101         | 0         | 0.00%         | 196          | 0         | 0.00%         | 1.00 [0e+00-Inf]     | 1.000    | 1.000   |
| BFAR      | 101         | 0         | 0.00%         | 196          | 0         | 0.00%         | 1.00 [0e+00-Inf]     | 1.000    | 1.000   |
| BGLAP     | 101         | 0         | 0.00%         | 196          | 0         | 0.00%         | 1.00 [0e+00-Inf]     | 1.000    | 1.000   |

| Symbol      | CINSARC Low |           |               | CINSARC High |           |               | CINSARC High vs. Low |          |         |
|-------------|-------------|-----------|---------------|--------------|-----------|---------------|----------------------|----------|---------|
|             | N tested    | N altered | Fq alteration | N tested     | N altered | Fq alteration | OR [95%CI]           | p-value* | q-value |
| BHLHE22     | 101         | 0         | 0.00%         | 196          | 0         | 0.00%         | 1.00 [0e+00-Inf]     | 1.000    | 1.000   |
| BHLHE23     | 101         | 0         | 0.00%         | 196          | 0         | 0.00%         | 1.00 [0e+00-Inf]     | 1.000    | 1.000   |
| BIRC5       | 101         | 0         | 0.00%         | 196          | 0         | 0.00%         | 1.00 [0e+00-Inf]     | 1.000    | 1.000   |
| BIRC7       | 101         | 0         | 0.00%         | 196          | 0         | 0.00%         | 1.00 [0e+00-Inf]     | 1.000    | 1.000   |
| BLCAP       | 101         | 0         | 0.00%         | 196          | 0         | 0.00%         | 1.00 [0e+00-Inf]     | 1.000    | 1.000   |
| BLMH        | 101         | 0         | 0.00%         | 196          | 0         | 0.00%         | 1.00 [0e+00-Inf]     | 1.000    | 1.000   |
| BLM         | 101         | 0         | 0.00%         | 196          | 0         | 0.00%         | 1.00 [0e+00-Inf]     | 1.000    | 1.000   |
| BLZF1       | 101         | 0         | 0.00%         | 196          | 0         | 0.00%         | 1.00 [0e+00-Inf]     | 1.000    | 1.000   |
| BMP7        | 101         | 0         | 0.00%         | 196          | 0         | 0.00%         | 1.00 [0e+00-Inf]     | 1.000    | 1.000   |
| BMPER       | 101         | 0         | 0.00%         | 196          | 0         | 0.00%         | 1.00 [0e+00-Inf]     | 1.000    | 1.000   |
| BMS1P4      | 101         | 0         | 0.00%         | 196          | 0         | 0.00%         | 1.00 [0e+00-Inf]     | 1.000    | 1.000   |
| BNIP1       | 101         | 0         | 0.00%         | 196          | 0         | 0.00%         | 1.00 [0e+00-Inf]     | 1.000    | 1.000   |
| BOD1        | 101         | 0         | 0.00%         | 196          | 0         | 0.00%         | 1.00 [0e+00-Inf]     | 1.000    | 1.000   |
| BOLA1       | 101         | 0         | 0.00%         | 196          | 0         | 0.00%         | 1.00 [0e+00-Inf]     | 1.000    | 1.000   |
| BOLA2       | 101         | 0         | 0.00%         | 196          | 0         | 0.00%         | 1.00 [0e+00-Inf]     | 1.000    | 1.000   |
| BOP1        | 101         | 0         | 0.00%         | 196          | 0         | 0.00%         | 1.00 [0e+00-Inf]     | 1.000    | 1.000   |
| BPI         | 101         | 0         | 0.00%         | 196          | 0         | 0.00%         | 1.00 [0e+00-Inf]     | 1.000    | 1.000   |
| BPNT1       | 101         | 0         | 0.00%         | 196          | 0         | 0.00%         | 1.00 [0e+00-Inf]     | 1.000    | 1.000   |
| BPTF        | 101         | 0         | 0.00%         | 196          | 0         | 0.00%         | 1.00 [0e+00-Inf]     | 1.000    | 1.000   |
| BPY2        | 101         | 65        | 64.36%        | 196          | 116       | 59.18%        | 0.80 [0.53-1.22]     | 0.387    | 1.000   |
| BRAF        | 101         | 0         | 0.00%         | 196          | 0         | 0.00%         | 1.00 [0e+00-Inf]     | 1.000    | 1.000   |
| BREA2       | 101         | 0         | 0.00%         | 196          | 0         | 0.00%         | 1.00 [0e+00-Inf]     | 1.000    | 1.000   |
| BRF2        | 101         | 0         | 0.00%         | 196          | 0         | 0.00%         | 1.00 [0e+00-Inf]     | 1.000    | 1.000   |
| BRIP1       | 101         | 0         | 0.00%         | 196          | 0         | 0.00%         | 1.00 [0e+00-Inf]     | 1.000    | 1.000   |
| BRMS1L      | 101         | 0         | 0.00%         | 196          | 0         | 0.00%         | 1.00 [0e+00-Inf]     | 1.000    | 1.000   |
| BRMS1       | 101         | 0         | 0.00%         | 196          | 0         | 0.00%         | 1.00 [0e+00-Inf]     | 1.000    | 1.000   |
| MPC2        | 101         | 0         | 0.00%         | 196          | 0         | 0.00%         | 1.00 [0e+00-Inf]     | 1.000    | 1.000   |
| BRSK1       | 101         | 0         | 0.00%         | 196          | 0         | 0.00%         | 1.00 [0e+00-Inf]     | 1.000    | 1.000   |
| SLX4        | 101         | 0         | 0.00%         | 196          | 0         | 0.00%         | 1.00 [0e+00-Inf]     | 1.000    | 1.000   |
| BTBD17      | 101         | 0         | 0.00%         | 196          | 0         | 0.00%         | 1.00 [0e+00-Inf]     | 1.000    | 1.000   |
| BTC         | 101         | 0         | 0.00%         | 196          | 0         | 0.00%         | 1.00 [0e+00-Inf]     | 1.000    | 1.000   |
| BTG1        | 101         | 0         | 0.00%         | 196          | 0         | 0.00%         | 1.00 [0e+00-Inf]     | 1.000    | 1.000   |
| BTG2        | 101         | 0         | 0.00%         | 196          | 0         | 0.00%         | 1.00 [0e+00-Inf]     | 1.000    | 1.000   |
| BTNL3       | 101         | 0         | 0.00%         | 196          | 0         | 0.00%         | 1.00 [0e+00-Inf]     | 1.000    | 1.000   |
| BVES        | 101         | 0         | 0.00%         | 196          | 0         | 0.00%         | 1.00 [0e+00-Inf]     | 1.000    | 1.000   |
| C10orf105   | 101         | 0         | 0.00%         | 196          | 0         | 0.00%         | 1.00 [0e+00-Inf]     | 1.000    | 1.000   |
| ZNF503-AS2  | 101         | 0         | 0.00%         | 196          | 0         | 0.00%         | 1.00 [0e+00-Inf]     | 1.000    | 1.000   |
| C10orf55    | 101         | 0         | 0.00%         | 196          | 0         | 0.00%         | 1.00 [0e+00-Inf]     | 1.000    | 1.000   |
| C11orf24    | 101         | 0         | 0.00%         | 196          | 0         | 0.00%         | 1.00 [0e+00-Inf]     | 1.000    | 1.000   |
| KIAA1549L   | 101         | 0         | 0.00%         | 196          | 0         | 0.00%         | 1.00 [0e+00-Inf]     | 1.000    | 1.000   |
| ANAPC15     | 101         | 0         | 0.00%         | 196          | 0         | 0.00%         | 1.00 [0e+00-Inf]     | 1.000    | 1.000   |
| C11orf58    | 101         | 0         | 0.00%         | 196          | 0         | 0.00%         | 1.00 [0e+00-Inf]     | 1.000    | 1.000   |
| LAMTOR1     | 101         | 0         | 0.00%         | 196          | 0         | 0.00%         | 1.00 [0e+00-Inf]     | 1.000    | 1.000   |
| PPP1R32     | 101         | 0         | 0.00%         | 196          | 0         | 0.00%         | 1.00 [0e+00-Inf]     | 1.000    | 1.000   |
| AAMDC       | 101         | 0         | 0.00%         | 196          | 0         | 0.00%         | 1.00 [0e+00-Inf]     | 1.000    | 1.000   |
| C11orf80    | 101         | 0         | 0.00%         | 196          | 0         | 0.00%         | 1.00 [0e+00-Inf]     | 1.000    | 1.000   |
| C11orf86    | 101         | 0         | 0.00%         | 196          | 0         | 0.00%         | 1.00 [0e+00-Inf]     | 1.000    | 1.000   |
| C12orf29    | 101         | 0         | 0.00%         | 196          | 0         | 0.00%         | 1.00 [0e+00-Inf]     | 1.000    | 1.000   |
| C12orf50    | 101         | 0         | 0.00%         | 196          | 0         | 0.00%         | 1.00 [0e+00-Inf]     | 1.000    | 1.000   |
| C12orf66    | 101         | 0         | 0.00%         | 196          | 0         | 0.00%         | 1.00 [0e+00-Inf]     | 1.000    | 1.000   |
| C12orf74    | 101         | 0         | 0.00%         | 196          | 0         | 0.00%         | 1.00 [0e+00-Inf]     | 1.000    | 1.000   |
| DTD2        | 101         | 0         | 0.00%         | 196          | 0         | 0.00%         | 1.00 [0e+00-Inf]     | 1.000    | 1.000   |
| ARHGAP5-AS1 | 101         | 0         | 0.00%         | 196          | 0         | 0.00%         | 1.00 [0e+00-Inf]     | 1.000    | 1.000   |
| SPTSSA      | 101         | 0         | 0.00%         | 196          | 0         | 0.00%         | 1.00 [0e+00-Inf]     | 1.000    | 1.000   |
| IGBP1P1     | 101         | 0         | 0.00%         | 196          | 0         | 0.00%         | 1.00 [0e+00-Inf]     | 1.000    | 1.000   |
| C15orf32    | 101         | 0         | 0.00%         | 196          | 0         | 0.00%         | 1.00 [0e+00-Inf]     | 1.000    | 1.000   |
| HEXA-AS1    | 101         | 0         | 0.00%         | 196          | 0         | 0.00%         | 1.00 [0e+00-Inf]     | 1.000    | 1.000   |
| TICRR       | 101         | 0         | 0.00%         | 196          | 0         | 0.00%         | 1.00 [0e+00-Inf]     | 1.000    | 1.000   |
| DNM1P46     | 101         | 0         | 0.00%         | 196          | 0         | 0.00%         | 1.00 [0e+00-Inf]     | 1.000    | 1.000   |
| GDPGP1      | 101         | 0         | 0.00%         | 196          | 0         | 0.00%         | 1.00 [0e+00-Inf]     | 1.000    | 1.000   |
| TSR3        | 101         | 0         | 0.00%         | 196          | 0         | 0.00%         | 1.00 [0e+00-Inf]     | 1.000    | 1.000   |
| PAGR1       | 101         | 0         | 0.00%         | 196          | 0         | 0.00%         | 1.00 [0e+00-Inf]     | 1.000    | 1.000   |
| C16orf54    | 101         | 0         | 0.00%         | 196          | 0         | 0.00%         | 1.00 [0e+00-Inf]     | 1.000    | 1.000   |
| C16orf58    | 101         | 0         | 0.00%         | 196          | 0         | 0.00%         | 1.00 [0e+00-Inf]     | 1.000    | 1.000   |
| CDIP1       | 101         | 0         | 0.00%         | 196          | 0         | 0.00%         | 1.00 [0e+00-Inf]     | 1.000    | 1.000   |
| FOPNL       | 101         | 0         | 0.00%         | 196          | 0         | 0.00%         | 1.00 [0e+00-Inf]     | 1.000    | 1.000   |
| METTL22     | 101         | 0         | 0.00%         | 196          | 0         | 0.00%         | 1.00 [0e+00-Inf]     | 1.000    | 1.000   |
| C16orf71    | 101         | 0         | 0.00%         | 196          | 0         | 0.00%         | 1.00 [0e+00-Inf]     | 1.000    | 1.000   |
| C16orf72    | 101         | 0         | 0.00%         | 196          | 0         | 0.00%         | 1.00 [0e+00-Inf]     | 1.000    | 1.000   |
| MEIOB       | 101         | 0         | 0.00%         | 196          | 0         | 0.00%         | 1.00 [0e+00-Inf]     | 1.000    | 1.000   |
| RMI2        | 101         | 0         | 0.00%         | 196          | 0         | 0.00%         | 1.00 [0e+00-Inf]     | 1.000    | 1.000   |

| Symbol      | CINSARC Low |           |               | CINSARC High |           |               | CINSARC High vs. Low |          |         |
|-------------|-------------|-----------|---------------|--------------|-----------|---------------|----------------------|----------|---------|
|             | N tested    | N altered | Fq alteration | N tested     | N altered | Fq alteration | OR [95%CI]           | p-value* | q-value |
| BRICD5      | 101         | 0         | 0.00%         | 196          | 0         | 0.00%         | 1.00 [0e+00-Inf]     | 1.000    | 1.000   |
| C16orf82    | 101         | 0         | 0.00%         | 196          | 0         | 0.00%         | 1.00 [0e+00-Inf]     | 1.000    | 1.000   |
| KNOP1       | 101         | 0         | 0.00%         | 196          | 0         | 0.00%         | 1.00 [0e+00-Inf]     | 1.000    | 1.000   |
| C16orf89    | 101         | 0         | 0.00%         | 196          | 0         | 0.00%         | 1.00 [0e+00-Inf]     | 1.000    | 1.000   |
| C16orf90    | 101         | 0         | 0.00%         | 196          | 0         | 0.00%         | 1.00 [0e+00-Inf]     | 1.000    | 1.000   |
| C16orf91    | 101         | 0         | 0.00%         | 196          | 0         | 0.00%         | 1.00 [0e+00-Inf]     | 1.000    | 1.000   |
| C16orf92    | 101         | 0         | 0.00%         | 196          | 0         | 0.00%         | 1.00 [0e+00-Inf]     | 1.000    | 1.000   |
| OGFOD3      | 101         | 0         | 0.00%         | 196          | 0         | 0.00%         | 1.00 [0e+00-Inf]     | 1.000    | 1.000   |
| TEN1        | 101         | 0         | 0.00%         | 196          | 0         | 0.00%         | 1.00 [0e+00-Inf]     | 1.000    | 1.000   |
| LYRM9       | 101         | 0         | 0.00%         | 196          | 0         | 0.00%         | 1.00 [0e+00-Inf]     | 1.000    | 1.000   |
| HID1        | 101         | 0         | 0.00%         | 196          | 0         | 0.00%         | 1.00 [0e+00-Inf]     | 1.000    | 1.000   |
| MIEN1       | 101         | 0         | 0.00%         | 196          | 0         | 0.00%         | 1.00 [0e+00-Inf]     | 1.000    | 1.000   |
| TEFM        | 101         | 0         | 0.00%         | 196          | 0         | 0.00%         | 1.00 [0e+00-Inf]     | 1.000    | 1.000   |
| sept-04     | 101         | 0         | 0.00%         | 196          | 0         | 0.00%         | 1.00 [0e+00-Inf]     | 1.000    | 1.000   |
| C17orf50    | 101         | 0         | 0.00%         | 196          | 0         | 0.00%         | 1.00 [0e+00-Inf]     | 1.000    | 1.000   |
| LINC00469   | 101         | 0         | 0.00%         | 196          | 0         | 0.00%         | 1.00 [0e+00-Inf]     | 1.000    | 1.000   |
| LINC00482   | 101         | 0         | 0.00%         | 196          | 0         | 0.00%         | 1.00 [0e+00-Inf]     | 1.000    | 1.000   |
| EFCAB13     | 101         | 0         | 0.00%         | 196          | 0         | 0.00%         | 1.00 [0e+00-Inf]     | 1.000    | 1.000   |
| C17orf58    | 101         | 0         | 0.00%         | 196          | 0         | 0.00%         | 1.00 [0e+00-Inf]     | 1.000    | 1.000   |
| MILR1       | 101         | 0         | 0.00%         | 196          | 0         | 0.00%         | 1.00 [0e+00-Inf]     | 1.000    | 1.000   |
| FAM222B     | 101         | 0         | 0.00%         | 196          | 0         | 0.00%         | 1.00 [0e+00-Inf]     | 1.000    | 1.000   |
| C17orf64    | 101         | 0         | 0.00%         | 196          | 0         | 0.00%         | 1.00 [0e+00-Inf]     | 1.000    | 1.000   |
| C17orf67    | 101         | 0         | 0.00%         | 196          | 0         | 0.00%         | 1.00 [0e+00-Inf]     | 1.000    | 1.000   |
| SMG8        | 101         | 0         | 0.00%         | 196          | 0         | 0.00%         | 1.00 [0e+00-Inf]     | 1.000    | 1.000   |
| C17orf77    | 101         | 0         | 0.00%         | 196          | 0         | 0.00%         | 1.00 [0e+00-Inf]     | 1.000    | 1.000   |
| C17orf78    | 101         | 0         | 0.00%         | 196          | 0         | 0.00%         | 1.00 [0e+00-Inf]     | 1.000    | 1.000   |
| C17orf80    | 101         | 0         | 0.00%         | 196          | 0         | 0.00%         | 1.00 [0e+00-Inf]     | 1.000    | 1.000   |
| C17orf82    | 101         | 0         | 0.00%         | 196          | 0         | 0.00%         | 1.00 [0e+00-Inf]     | 1.000    | 1.000   |
| OXLD1       | 101         | 0         | 0.00%         | 196          | 0         | 0.00%         | 1.00 [0e+00-Inf]     | 1.000    | 1.000   |
| PRAC2       | 101         | 0         | 0.00%         | 196          | 0         | 0.00%         | 1.00 [0e+00-Inf]     | 1.000    | 1.000   |
| METTL23     | 101         | 0         | 0.00%         | 196          | 0         | 0.00%         | 1.00 [0e+00-Inf]     | 1.000    | 1.000   |
| C17orf98    | 101         | 0         | 0.00%         | 196          | 0         | 0.00%         | 1.00 [0e+00-Inf]     | 1.000    | 1.000   |
| C17orf99    | 101         | 0         | 0.00%         | 196          | 0         | 0.00%         | 1.00 [0e+00-Inf]     | 1.000    | 1.000   |
| LINC00305   | 101         | 0         | 0.00%         | 196          | 0         | 0.00%         | 1.00 [0e+00-Inf]     | 1.000    | 1.000   |
| DYNAP       | 101         | 0         | 0.00%         | 196          | 0         | 0.00%         | 1.00 [0e+00-Inf]     | 1.000    | 1.000   |
| C18orf54    | 101         | 0         | 0.00%         | 196          | 0         | 0.00%         | 1.00 [0e+00-Inf]     | 1.000    | 1.000   |
| C1QTNF1     | 101         | 0         | 0.00%         | 196          | 0         | 0.00%         | 1.00 [0e+00-Inf]     | 1.000    | 1.000   |
| C1QTNF8     | 101         | 0         | 0.00%         | 196          | 0         | 0.00%         | 1.00 [0e+00-Inf]     | 1.000    | 1.000   |
| C1orf100    | 101         | 0         | 0.00%         | 196          | 0         | 0.00%         | 1.00 [0e+00-Inf]     | 1.000    | 1.000   |
| RUSC1-AS1   | 101         | 0         | 0.00%         | 196          | 0         | 0.00%         | 1.00 [0e+00-Inf]     | 1.000    | 1.000   |
| C1orf105    | 101         | 0         | 0.00%         | 196          | 0         | 0.00%         | 1.00 [0e+00-Inf]     | 1.000    | 1.000   |
| C1orf112    | 101         | 0         | 0.00%         | 196          | 0         | 0.00%         | 1.00 [0e+00-Inf]     | 1.000    | 1.000   |
| CCDC181     | 101         | 0         | 0.00%         | 196          | 0         | 0.00%         | 1.00 [0e+00-Inf]     | 1.000    | 1.000   |
| C1orf115    | 101         | 0         | 0.00%         | 196          | 0         | 0.00%         | 1.00 [0e+00-Inf]     | 1.000    | 1.000   |
| C1orf116    | 101         | 0         | 0.00%         | 196          | 0         | 0.00%         | 1.00 [0e+00-Inf]     | 1.000    | 1.000   |
| SPR1N       | 101         | 0         | 0.00%         | 196          | 0         | 0.00%         | 1.00 [0e+00-Inf]     | 1.000    | 1.000   |
| AXDND1      | 101         | 0         | 0.00%         | 196          | 0         | 0.00%         | 1.00 [0e+00-Inf]     | 1.000    | 1.000   |
| MROH9       | 101         | 0         | 0.00%         | 196          | 0         | 0.00%         | 1.00 [0e+00-Inf]     | 1.000    | 1.000   |
| C1orf131    | 101         | 0         | 0.00%         | 196          | 0         | 0.00%         | 1.00 [0e+00-Inf]     | 1.000    | 1.000   |
| SERTAD4-AS1 | 101         | 0         | 0.00%         | 196          | 0         | 0.00%         | 1.00 [0e+00-Inf]     | 1.000    | 1.000   |
| SHCBP1L     | 101         | 0         | 0.00%         | 196          | 0         | 0.00%         | 1.00 [0e+00-Inf]     | 1.000    | 1.000   |
| GCSAML      | 101         | 0         | 0.00%         | 196          | 0         | 0.00%         | 1.00 [0e+00-Inf]     | 1.000    | 1.000   |
| PFN1P2      | 101         | 0         | 0.00%         | 196          | 0         | 0.00%         | 1.00 [0e+00-Inf]     | 1.000    | 1.000   |
| METTL18     | 101         | 0         | 0.00%         | 196          | 0         | 0.00%         | 1.00 [0e+00-Inf]     | 1.000    | 1.000   |
| LINC00303   | 101         | 0         | 0.00%         | 196          | 0         | 0.00%         | 1.00 [0e+00-Inf]     | 1.000    | 1.000   |
| TSACC       | 101         | 0         | 0.00%         | 196          | 0         | 0.00%         | 1.00 [0e+00-Inf]     | 1.000    | 1.000   |
| C1orf189    | 101         | 0         | 0.00%         | 196          | 0         | 0.00%         | 1.00 [0e+00-Inf]     | 1.000    | 1.000   |
| C1orf198    | 101         | 0         | 0.00%         | 196          | 0         | 0.00%         | 1.00 [0e+00-Inf]     | 1.000    | 1.000   |
| C1orf21     | 101         | 0         | 0.00%         | 196          | 0         | 0.00%         | 1.00 [0e+00-Inf]     | 1.000    | 1.000   |
| C1orf220    | 101         | 0         | 0.00%         | 196          | 0         | 0.00%         | 1.00 [0e+00-Inf]     | 1.000    | 1.000   |
| C1orf226    | 101         | 0         | 0.00%         | 196          | 0         | 0.00%         | 1.00 [0e+00-Inf]     | 1.000    | 1.000   |
| C1orf229    | 101         | 0         | 0.00%         | 196          | 0         | 0.00%         | 1.00 [0e+00-Inf]     | 1.000    | 1.000   |
| RIIAD1      | 101         | 0         | 0.00%         | 196          | 0         | 0.00%         | 1.00 [0e+00-Inf]     | 1.000    | 1.000   |
| TRMT1L      | 101         | 0         | 0.00%         | 196          | 0         | 0.00%         | 1.00 [0e+00-Inf]     | 1.000    | 1.000   |
| SWT1        | 101         | 0         | 0.00%         | 196          | 0         | 0.00%         | 1.00 [0e+00-Inf]     | 1.000    | 1.000   |
| COA6        | 101         | 0         | 0.00%         | 196          | 0         | 0.00%         | 1.00 [0e+00-Inf]     | 1.000    | 1.000   |
| C1orf35     | 101         | 0         | 0.00%         | 196          | 0         | 0.00%         | 1.00 [0e+00-Inf]     | 1.000    | 1.000   |
| C1orf43     | 101         | 0         | 0.00%         | 196          | 0         | 0.00%         | 1.00 [0e+00-Inf]     | 1.000    | 1.000   |
| TEX35       | 101         | 0         | 0.00%         | 196          | 0         | 0.00%         | 1.00 [0e+00-Inf]     | 1.000    | 1.000   |
| C1orf53     | 101         | 0         | 0.00%         | 196          | 0         | 0.00%         | 1.00 [0e+00-Inf]     | 1.000    | 1.000   |
| C1orf54     | 101         | 0         | 0.00%         | 196          | 0         | 0.00%         | 1.00 [0e+00-Inf]     | 1.000    | 1.000   |

| Symbol             | CINSARC Low |           |               | CINSARC High |           |               | CINSARC High vs. Low |          |         |
|--------------------|-------------|-----------|---------------|--------------|-----------|---------------|----------------------|----------|---------|
|                    | N tested    | N altered | Fq alteration | N tested     | N altered | Fq alteration | OR [95%CI]           | p-value* | q-value |
| <i>SDE2</i>        | 101         | 0         | 0.00%         | 196          | 0         | 0.00%         | 1.00 [0e+00-Inf]     | 1.000    | 1.000   |
| <i>C1orf56</i>     | 101         | 0         | 0.00%         | 196          | 0         | 0.00%         | 1.00 [0e+00-Inf]     | 1.000    | 1.000   |
| <i>NTPCR</i>       | 101         | 0         | 0.00%         | 196          | 0         | 0.00%         | 1.00 [0e+00-Inf]     | 1.000    | 1.000   |
| <i>BROX</i>        | 101         | 0         | 0.00%         | 196          | 0         | 0.00%         | 1.00 [0e+00-Inf]     | 1.000    | 1.000   |
| <i>C1orf61</i>     | 101         | 0         | 0.00%         | 196          | 0         | 0.00%         | 1.00 [0e+00-Inf]     | 1.000    | 1.000   |
| <i>RRNAD1</i>      | 101         | 0         | 0.00%         | 196          | 0         | 0.00%         | 1.00 [0e+00-Inf]     | 1.000    | 1.000   |
| <i>C1orf68</i>     | 101         | 0         | 0.00%         | 196          | 0         | 0.00%         | 1.00 [0e+00-Inf]     | 1.000    | 1.000   |
| <i>IBA57</i>       | 101         | 0         | 0.00%         | 196          | 0         | 0.00%         | 1.00 [0e+00-Inf]     | 1.000    | 1.000   |
| <i>C1orf74</i>     | 101         | 0         | 0.00%         | 196          | 0         | 0.00%         | 1.00 [0e+00-Inf]     | 1.000    | 1.000   |
| <i>CHTOP</i>       | 101         | 0         | 0.00%         | 196          | 0         | 0.00%         | 1.00 [0e+00-Inf]     | 1.000    | 1.000   |
| <i>LRRC71</i>      | 101         | 0         | 0.00%         | 196          | 0         | 0.00%         | 1.00 [0e+00-Inf]     | 1.000    | 1.000   |
| <i>CCSAP</i>       | 101         | 0         | 0.00%         | 196          | 0         | 0.00%         | 1.00 [0e+00-Inf]     | 1.000    | 1.000   |
| <i>LINC00467</i>   | 101         | 0         | 0.00%         | 196          | 0         | 0.00%         | 1.00 [0e+00-Inf]     | 1.000    | 1.000   |
| <i>SUCO</i>        | 101         | 0         | 0.00%         | 196          | 0         | 0.00%         | 1.00 [0e+00-Inf]     | 1.000    | 1.000   |
| <i>FAM209A</i>     | 101         | 0         | 0.00%         | 196          | 0         | 0.00%         | 1.00 [0e+00-Inf]     | 1.000    | 1.000   |
| <i>FAM209B</i>     | 101         | 0         | 0.00%         | 196          | 0         | 0.00%         | 1.00 [0e+00-Inf]     | 1.000    | 1.000   |
| <i>FAM210B</i>     | 101         | 0         | 0.00%         | 196          | 0         | 0.00%         | 1.00 [0e+00-Inf]     | 1.000    | 1.000   |
| <i>OSER1</i>       | 101         | 0         | 0.00%         | 196          | 0         | 0.00%         | 1.00 [0e+00-Inf]     | 1.000    | 1.000   |
| <i>SOGA1</i>       | 101         | 0         | 0.00%         | 196          | 0         | 0.00%         | 1.00 [0e+00-Inf]     | 1.000    | 1.000   |
| <i>TLDC2</i>       | 101         | 0         | 0.00%         | 196          | 0         | 0.00%         | 1.00 [0e+00-Inf]     | 1.000    | 1.000   |
| <i>GID8</i>        | 101         | 0         | 0.00%         | 196          | 0         | 0.00%         | 1.00 [0e+00-Inf]     | 1.000    | 1.000   |
| <i>OCSTAMP</i>     | 101         | 0         | 0.00%         | 196          | 0         | 0.00%         | 1.00 [0e+00-Inf]     | 1.000    | 1.000   |
| <i>MROH8</i>       | 101         | 0         | 0.00%         | 196          | 0         | 0.00%         | 1.00 [0e+00-Inf]     | 1.000    | 1.000   |
| <i>ABHD16B</i>     | 101         | 0         | 0.00%         | 196          | 0         | 0.00%         | 1.00 [0e+00-Inf]     | 1.000    | 1.000   |
| <i>RBBP8NL</i>     | 101         | 0         | 0.00%         | 196          | 0         | 0.00%         | 1.00 [0e+00-Inf]     | 1.000    | 1.000   |
| <i>CNBD2</i>       | 101         | 0         | 0.00%         | 196          | 0         | 0.00%         | 1.00 [0e+00-Inf]     | 1.000    | 1.000   |
| <i>SPATA25</i>     | 101         | 0         | 0.00%         | 196          | 0         | 0.00%         | 1.00 [0e+00-Inf]     | 1.000    | 1.000   |
| <i>C20orf173</i>   | 101         | 0         | 0.00%         | 196          | 0         | 0.00%         | 1.00 [0e+00-Inf]     | 1.000    | 1.000   |
| <i>FAM217B</i>     | 101         | 0         | 0.00%         | 196          | 0         | 0.00%         | 1.00 [0e+00-Inf]     | 1.000    | 1.000   |
| <i>C20orf197</i>   | 101         | 0         | 0.00%         | 196          | 0         | 0.00%         | 1.00 [0e+00-Inf]     | 1.000    | 1.000   |
| <i>ZFAS1</i>       | 101         | 0         | 0.00%         | 196          | 0         | 0.00%         | 1.00 [0e+00-Inf]     | 1.000    | 1.000   |
| <i>MRGBP</i>       | 101         | 0         | 0.00%         | 196          | 0         | 0.00%         | 1.00 [0e+00-Inf]     | 1.000    | 1.000   |
| <i>AAR2</i>        | 101         | 0         | 0.00%         | 196          | 0         | 0.00%         | 1.00 [0e+00-Inf]     | 1.000    | 1.000   |
| <i>C20orf85</i>    | 101         | 0         | 0.00%         | 196          | 0         | 0.00%         | 1.00 [0e+00-Inf]     | 1.000    | 1.000   |
| <i>C2CD3</i>       | 101         | 0         | 0.00%         | 196          | 0         | 0.00%         | 1.00 [0e+00-Inf]     | 1.000    | 1.000   |
| <i>C2CD4D</i>      | 101         | 0         | 0.00%         | 196          | 0         | 0.00%         | 1.00 [0e+00-Inf]     | 1.000    | 1.000   |
| <i>ERGIC3</i>      | 101         | 0         | 0.00%         | 196          | 0         | 0.00%         | 1.00 [0e+00-Inf]     | 1.000    | 1.000   |
| <i>XXYL1</i>       | 101         | 0         | 0.00%         | 196          | 0         | 0.00%         | 1.00 [0e+00-Inf]     | 1.000    | 1.000   |
| <i>CEP19</i>       | 101         | 0         | 0.00%         | 196          | 0         | 0.00%         | 1.00 [0e+00-Inf]     | 1.000    | 1.000   |
| <i>MB21D2</i>      | 101         | 0         | 0.00%         | 196          | 0         | 0.00%         | 1.00 [0e+00-Inf]     | 1.000    | 1.000   |
| <i>C3orf70</i>     | 101         | 0         | 0.00%         | 196          | 0         | 0.00%         | 1.00 [0e+00-Inf]     | 1.000    | 1.000   |
| <i>C4BPA</i>       | 101         | 0         | 0.00%         | 196          | 0         | 0.00%         | 1.00 [0e+00-Inf]     | 1.000    | 1.000   |
| <i>C4BPB</i>       | 101         | 0         | 0.00%         | 196          | 0         | 0.00%         | 1.00 [0e+00-Inf]     | 1.000    | 1.000   |
| <i>GFOD1</i>       | 101         | 0         | 0.00%         | 196          | 0         | 0.00%         | 1.00 [0e+00-Inf]     | 1.000    | 1.000   |
| <i>C6orf203</i>    | 101         | 0         | 0.00%         | 196          | 0         | 0.00%         | 1.00 [0e+00-Inf]     | 1.000    | 1.000   |
| <i>CCDC170</i>     | 101         | 0         | 0.00%         | 196          | 0         | 0.00%         | 1.00 [0e+00-Inf]     | 1.000    | 1.000   |
| <i>PPP1R17</i>     | 101         | 0         | 0.00%         | 196          | 0         | 0.00%         | 1.00 [0e+00-Inf]     | 1.000    | 1.000   |
| <i>MALSU1</i>      | 101         | 0         | 0.00%         | 196          | 0         | 0.00%         | 1.00 [0e+00-Inf]     | 1.000    | 1.000   |
| <i>C7orf31</i>     | 101         | 0         | 0.00%         | 196          | 0         | 0.00%         | 1.00 [0e+00-Inf]     | 1.000    | 1.000   |
| <i>MTURN</i>       | 101         | 0         | 0.00%         | 196          | 0         | 0.00%         | 1.00 [0e+00-Inf]     | 1.000    | 1.000   |
| <i>FAM221A</i>     | 101         | 0         | 0.00%         | 196          | 0         | 0.00%         | 1.00 [0e+00-Inf]     | 1.000    | 1.000   |
| <i>C7orf71</i>     | 101         | 0         | 0.00%         | 196          | 0         | 0.00%         | 1.00 [0e+00-Inf]     | 1.000    | 1.000   |
| <i>TMEM249</i>     | 101         | 0         | 0.00%         | 196          | 0         | 0.00%         | 1.00 [0e+00-Inf]     | 1.000    | 1.000   |
| <i>C8orf31</i>     | 101         | 0         | 0.00%         | 196          | 0         | 0.00%         | 1.00 [0e+00-Inf]     | 1.000    | 1.000   |
| <i>C8orf33</i>     | 101         | 0         | 0.00%         | 196          | 0         | 0.00%         | 1.00 [0e+00-Inf]     | 1.000    | 1.000   |
| <i>C8orf34</i>     | 101         | 0         | 0.00%         | 196          | 0         | 0.00%         | 1.00 [0e+00-Inf]     | 1.000    | 1.000   |
| <i>C8orf37</i>     | 101         | 0         | 0.00%         | 196          | 0         | 0.00%         | 1.00 [0e+00-Inf]     | 1.000    | 1.000   |
| <i>NDUFAF6</i>     | 101         | 0         | 0.00%         | 196          | 0         | 0.00%         | 1.00 [0e+00-Inf]     | 1.000    | 1.000   |
| <i>RBM12B-AS1</i>  | 101         | 0         | 0.00%         | 196          | 0         | 0.00%         | 1.00 [0e+00-Inf]     | 1.000    | 1.000   |
| <i>SMIM19</i>      | 101         | 0         | 0.00%         | 196          | 0         | 0.00%         | 1.00 [0e+00-Inf]     | 1.000    | 1.000   |
| <i>TTI2</i>        | 101         | 0         | 0.00%         | 196          | 0         | 0.00%         | 1.00 [0e+00-Inf]     | 1.000    | 1.000   |
| <i>C8orf44</i>     | 101         | 0         | 0.00%         | 196          | 0         | 0.00%         | 1.00 [0e+00-Inf]     | 1.000    | 1.000   |
| <i>MCMDC2</i>      | 101         | 0         | 0.00%         | 196          | 0         | 0.00%         | 1.00 [0e+00-Inf]     | 1.000    | 1.000   |
| <i>RHPN1-AS1</i>   | 101         | 0         | 0.00%         | 196          | 0         | 0.00%         | 1.00 [0e+00-Inf]     | 1.000    | 1.000   |
| <i>THEM6</i>       | 101         | 0         | 0.00%         | 196          | 0         | 0.00%         | 1.00 [0e+00-Inf]     | 1.000    | 1.000   |
| <i>LINC00588</i>   | 101         | 0         | 0.00%         | 196          | 0         | 0.00%         | 1.00 [0e+00-Inf]     | 1.000    | 1.000   |
| <i>MROH6</i>       | 101         | 0         | 0.00%         | 196          | 0         | 0.00%         | 1.00 [0e+00-Inf]     | 1.000    | 1.000   |
| <i>C8orf76</i>     | 101         | 0         | 0.00%         | 196          | 0         | 0.00%         | 1.00 [0e+00-Inf]     | 1.000    | 1.000   |
| <i>ZNF252P-AS1</i> | 101         | 0         | 0.00%         | 196          | 0         | 0.00%         | 1.00 [0e+00-Inf]     | 1.000    | 1.000   |
| <i>TRIQK</i>       | 101         | 0         | 0.00%         | 196          | 0         | 0.00%         | 1.00 [0e+00-Inf]     | 1.000    | 1.000   |
| <i>SBSPON</i>      | 101         | 0         | 0.00%         | 196          | 0         | 0.00%         | 1.00 [0e+00-Inf]     | 1.000    | 1.000   |



| Symbol   | CINSARC Low |           |               | CINSARC High |           |               | CINSARC High vs. Low |          |         |
|----------|-------------|-----------|---------------|--------------|-----------|---------------|----------------------|----------|---------|
|          | N tested    | N altered | Fq alteration | N tested     | N altered | Fq alteration | OR [95%CI]           | p-value* | q-value |
| AARD     | 101         | 0         | 0.00%         | 196          | 0         | 0.00%         | 1.00 [0e+00-Inf]     | 1.000    | 1.000   |
| C8orf86  | 101         | 0         | 0.00%         | 196          | 0         | 0.00%         | 1.00 [0e+00-Inf]     | 1.000    | 1.000   |
| C9orf131 | 101         | 0         | 0.00%         | 196          | 0         | 0.00%         | 1.00 [0e+00-Inf]     | 1.000    | 1.000   |
| FAM205A  | 101         | 0         | 0.00%         | 196          | 0         | 0.00%         | 1.00 [0e+00-Inf]     | 1.000    | 1.000   |
| RPP25L   | 101         | 0         | 0.00%         | 196          | 0         | 0.00%         | 1.00 [0e+00-Inf]     | 1.000    | 1.000   |
| CA10     | 101         | 0         | 0.00%         | 196          | 0         | 0.00%         | 1.00 [0e+00-Inf]     | 1.000    | 1.000   |
| CA13     | 101         | 0         | 0.00%         | 196          | 0         | 0.00%         | 1.00 [0e+00-Inf]     | 1.000    | 1.000   |
| CA14     | 101         | 0         | 0.00%         | 196          | 0         | 0.00%         | 1.00 [0e+00-Inf]     | 1.000    | 1.000   |
| CA1      | 101         | 0         | 0.00%         | 196          | 0         | 0.00%         | 1.00 [0e+00-Inf]     | 1.000    | 1.000   |
| CA2      | 101         | 0         | 0.00%         | 196          | 0         | 0.00%         | 1.00 [0e+00-Inf]     | 1.000    | 1.000   |
| CA3      | 101         | 0         | 0.00%         | 196          | 0         | 0.00%         | 1.00 [0e+00-Inf]     | 1.000    | 1.000   |
| CA4      | 101         | 0         | 0.00%         | 196          | 0         | 0.00%         | 1.00 [0e+00-Inf]     | 1.000    | 1.000   |
| CA8      | 101         | 0         | 0.00%         | 196          | 0         | 0.00%         | 1.00 [0e+00-Inf]     | 1.000    | 1.000   |
| CABLES2  | 101         | 0         | 0.00%         | 196          | 0         | 0.00%         | 1.00 [0e+00-Inf]     | 1.000    | 1.000   |
| CABP2    | 101         | 0         | 0.00%         | 196          | 0         | 0.00%         | 1.00 [0e+00-Inf]     | 1.000    | 1.000   |
| CABP4    | 101         | 0         | 0.00%         | 196          | 0         | 0.00%         | 1.00 [0e+00-Inf]     | 1.000    | 1.000   |
| CACNA1E  | 101         | 0         | 0.00%         | 196          | 0         | 0.00%         | 1.00 [0e+00-Inf]     | 1.000    | 1.000   |
| CACNA1G  | 101         | 0         | 0.00%         | 196          | 0         | 0.00%         | 1.00 [0e+00-Inf]     | 1.000    | 1.000   |
| CACNA1H  | 101         | 0         | 0.00%         | 196          | 0         | 0.00%         | 1.00 [0e+00-Inf]     | 1.000    | 1.000   |
| CACNA1S  | 101         | 0         | 0.00%         | 196          | 0         | 0.00%         | 1.00 [0e+00-Inf]     | 1.000    | 1.000   |
| CACNB1   | 101         | 0         | 0.00%         | 196          | 0         | 0.00%         | 1.00 [0e+00-Inf]     | 1.000    | 1.000   |
| CACNG1   | 101         | 0         | 0.00%         | 196          | 0         | 0.00%         | 1.00 [0e+00-Inf]     | 1.000    | 1.000   |
| CACNG3   | 101         | 0         | 0.00%         | 196          | 0         | 0.00%         | 1.00 [0e+00-Inf]     | 1.000    | 1.000   |
| CACNG4   | 101         | 0         | 0.00%         | 196          | 0         | 0.00%         | 1.00 [0e+00-Inf]     | 1.000    | 1.000   |
| CACNG5   | 101         | 0         | 0.00%         | 196          | 0         | 0.00%         | 1.00 [0e+00-Inf]     | 1.000    | 1.000   |
| CACYBP   | 101         | 0         | 0.00%         | 196          | 0         | 0.00%         | 1.00 [0e+00-Inf]     | 1.000    | 1.000   |
| CADM3    | 101         | 0         | 0.00%         | 196          | 0         | 0.00%         | 1.00 [0e+00-Inf]     | 1.000    | 1.000   |
| CALB1    | 101         | 0         | 0.00%         | 196          | 0         | 0.00%         | 1.00 [0e+00-Inf]     | 1.000    | 1.000   |
| CALCA    | 101         | 0         | 0.00%         | 196          | 0         | 0.00%         | 1.00 [0e+00-Inf]     | 1.000    | 1.000   |
| CALCB    | 101         | 0         | 0.00%         | 196          | 0         | 0.00%         | 1.00 [0e+00-Inf]     | 1.000    | 1.000   |
| CALCOCO2 | 101         | 0         | 0.00%         | 196          | 0         | 0.00%         | 1.00 [0e+00-Inf]     | 1.000    | 1.000   |
| CAMK1G   | 101         | 0         | 0.00%         | 196          | 0         | 0.00%         | 1.00 [0e+00-Inf]     | 1.000    | 1.000   |
| CAMK2B   | 101         | 0         | 0.00%         | 196          | 0         | 0.00%         | 1.00 [0e+00-Inf]     | 1.000    | 1.000   |
| CAMK2G   | 101         | 0         | 0.00%         | 196          | 0         | 0.00%         | 1.00 [0e+00-Inf]     | 1.000    | 1.000   |
| CAMK2N2  | 101         | 0         | 0.00%         | 196          | 0         | 0.00%         | 1.00 [0e+00-Inf]     | 1.000    | 1.000   |
| CAMSAP2  | 101         | 0         | 0.00%         | 196          | 0         | 0.00%         | 1.00 [0e+00-Inf]     | 1.000    | 1.000   |
| CAND1    | 101         | 0         | 0.00%         | 196          | 0         | 0.00%         | 1.00 [0e+00-Inf]     | 1.000    | 1.000   |
| CANT1    | 101         | 0         | 0.00%         | 196          | 0         | 0.00%         | 1.00 [0e+00-Inf]     | 1.000    | 1.000   |
| CAPN2    | 101         | 0         | 0.00%         | 196          | 0         | 0.00%         | 1.00 [0e+00-Inf]     | 1.000    | 1.000   |
| CAPN5    | 101         | 0         | 0.00%         | 196          | 0         | 0.00%         | 1.00 [0e+00-Inf]     | 1.000    | 1.000   |
| CAPN8    | 101         | 0         | 0.00%         | 196          | 0         | 0.00%         | 1.00 [0e+00-Inf]     | 1.000    | 1.000   |
| CAPN9    | 101         | 0         | 0.00%         | 196          | 0         | 0.00%         | 1.00 [0e+00-Inf]     | 1.000    | 1.000   |
| CAPS2    | 101         | 0         | 0.00%         | 196          | 0         | 0.00%         | 1.00 [0e+00-Inf]     | 1.000    | 1.000   |
| CARD14   | 101         | 0         | 0.00%         | 196          | 0         | 0.00%         | 1.00 [0e+00-Inf]     | 1.000    | 1.000   |
| CARHSP1  | 101         | 0         | 0.00%         | 196          | 0         | 0.00%         | 1.00 [0e+00-Inf]     | 1.000    | 1.000   |
| CARNS1   | 101         | 0         | 0.00%         | 196          | 0         | 0.00%         | 1.00 [0e+00-Inf]     | 1.000    | 1.000   |
| CASC3    | 101         | 0         | 0.00%         | 196          | 0         | 0.00%         | 1.00 [0e+00-Inf]     | 1.000    | 1.000   |
| CASKIN1  | 101         | 0         | 0.00%         | 196          | 0         | 0.00%         | 1.00 [0e+00-Inf]     | 1.000    | 1.000   |
| CASKIN2  | 101         | 0         | 0.00%         | 196          | 0         | 0.00%         | 1.00 [0e+00-Inf]     | 1.000    | 1.000   |
| CASQ1    | 101         | 0         | 0.00%         | 196          | 0         | 0.00%         | 1.00 [0e+00-Inf]     | 1.000    | 1.000   |
| CASS4    | 101         | 0         | 0.00%         | 196          | 0         | 0.00%         | 1.00 [0e+00-Inf]     | 1.000    | 1.000   |
| CATSPER1 | 101         | 0         | 0.00%         | 196          | 0         | 0.00%         | 1.00 [0e+00-Inf]     | 1.000    | 1.000   |
| CBLN4    | 101         | 0         | 0.00%         | 196          | 0         | 0.00%         | 1.00 [0e+00-Inf]     | 1.000    | 1.000   |
| CBX1     | 101         | 0         | 0.00%         | 196          | 0         | 0.00%         | 1.00 [0e+00-Inf]     | 1.000    | 1.000   |
| CBX2     | 101         | 0         | 0.00%         | 196          | 0         | 0.00%         | 1.00 [0e+00-Inf]     | 1.000    | 1.000   |
| CBX3     | 101         | 0         | 0.00%         | 196          | 0         | 0.00%         | 1.00 [0e+00-Inf]     | 1.000    | 1.000   |
| CBX4     | 101         | 0         | 0.00%         | 196          | 0         | 0.00%         | 1.00 [0e+00-Inf]     | 1.000    | 1.000   |
| CBX8     | 101         | 0         | 0.00%         | 196          | 0         | 0.00%         | 1.00 [0e+00-Inf]     | 1.000    | 1.000   |
| CCBE1    | 101         | 0         | 0.00%         | 196          | 0         | 0.00%         | 1.00 [0e+00-Inf]     | 1.000    | 1.000   |
| CCDC106  | 101         | 0         | 0.00%         | 196          | 0         | 0.00%         | 1.00 [0e+00-Inf]     | 1.000    | 1.000   |
| MCU      | 101         | 0         | 0.00%         | 196          | 0         | 0.00%         | 1.00 [0e+00-Inf]     | 1.000    | 1.000   |
| CCDC126  | 101         | 0         | 0.00%         | 196          | 0         | 0.00%         | 1.00 [0e+00-Inf]     | 1.000    | 1.000   |
| CCDC137  | 101         | 0         | 0.00%         | 196          | 0         | 0.00%         | 1.00 [0e+00-Inf]     | 1.000    | 1.000   |
| CCDC144B | 101         | 0         | 0.00%         | 196          | 0         | 0.00%         | 1.00 [0e+00-Inf]     | 1.000    | 1.000   |
| CCDC154  | 101         | 0         | 0.00%         | 196          | 0         | 0.00%         | 1.00 [0e+00-Inf]     | 1.000    | 1.000   |
| CCDC158  | 101         | 0         | 0.00%         | 196          | 0         | 0.00%         | 1.00 [0e+00-Inf]     | 1.000    | 1.000   |
| CCDC39   | 101         | 0         | 0.00%         | 196          | 0         | 0.00%         | 1.00 [0e+00-Inf]     | 1.000    | 1.000   |
| CCDC40   | 101         | 0         | 0.00%         | 196          | 0         | 0.00%         | 1.00 [0e+00-Inf]     | 1.000    | 1.000   |
| CEP95    | 101         | 0         | 0.00%         | 196          | 0         | 0.00%         | 1.00 [0e+00-Inf]     | 1.000    | 1.000   |
| CEP112   | 101         | 0         | 0.00%         | 196          | 0         | 0.00%         | 1.00 [0e+00-Inf]     | 1.000    | 1.000   |
| CCDC47   | 101         | 0         | 0.00%         | 196          | 0         | 0.00%         | 1.00 [0e+00-Inf]     | 1.000    | 1.000   |



| Symbol   | CINSARC Low |           |               | CINSARC High |           |               | CINSARC High vs. Low |          |         |
|----------|-------------|-----------|---------------|--------------|-----------|---------------|----------------------|----------|---------|
|          | N tested    | N altered | Fq alteration | N tested     | N altered | Fq alteration | OR [95%CI]           | p-value* | q-value |
| CDH26    | 101         | 0         | 0.00%         | 196          | 0         | 0.00%         | 1.00 [0e+00-Inf]     | 1.000    | 1.000   |
| CDH4     | 101         | 0         | 0.00%         | 196          | 0         | 0.00%         | 1.00 [0e+00-Inf]     | 1.000    | 1.000   |
| CDIPT    | 101         | 0         | 0.00%         | 196          | 0         | 0.00%         | 1.00 [0e+00-Inf]     | 1.000    | 1.000   |
| CDK12    | 101         | 0         | 0.00%         | 196          | 0         | 0.00%         | 1.00 [0e+00-Inf]     | 1.000    | 1.000   |
| CDK18    | 101         | 0         | 0.00%         | 196          | 0         | 0.00%         | 1.00 [0e+00-Inf]     | 1.000    | 1.000   |
| CDK2AP2  | 101         | 0         | 0.00%         | 196          | 0         | 0.00%         | 1.00 [0e+00-Inf]     | 1.000    | 1.000   |
| CDK3     | 101         | 0         | 0.00%         | 196          | 0         | 0.00%         | 1.00 [0e+00-Inf]     | 1.000    | 1.000   |
| CDK4     | 101         | 0         | 0.00%         | 196          | 0         | 0.00%         | 1.00 [0e+00-Inf]     | 1.000    | 1.000   |
| CDK5R1   | 101         | 0         | 0.00%         | 196          | 0         | 0.00%         | 1.00 [0e+00-Inf]     | 1.000    | 1.000   |
| CDK5RAP3 | 101         | 0         | 0.00%         | 196          | 0         | 0.00%         | 1.00 [0e+00-Inf]     | 1.000    | 1.000   |
| CDKL2    | 101         | 0         | 0.00%         | 196          | 0         | 0.00%         | 1.00 [0e+00-Inf]     | 1.000    | 1.000   |
| CDR2L    | 101         | 0         | 0.00%         | 196          | 0         | 0.00%         | 1.00 [0e+00-Inf]     | 1.000    | 1.000   |
| CDR2     | 101         | 0         | 0.00%         | 196          | 0         | 0.00%         | 1.00 [0e+00-Inf]     | 1.000    | 1.000   |
| CDY1B    | 101         | 65        | 64.36%        | 196          | 117       | 59.69%        | 0.82 [0.54-1.25]     | 0.435    | 1.000   |
| CDY1     | 101         | 65        | 64.36%        | 196          | 117       | 59.69%        | 0.82 [0.54-1.25]     | 0.435    | 1.000   |
| CDY2B    | 101         | 65        | 64.36%        | 196          | 117       | 59.69%        | 0.82 [0.54-1.25]     | 0.435    | 1.000   |
| CEBPB    | 101         | 0         | 0.00%         | 196          | 0         | 0.00%         | 1.00 [0e+00-Inf]     | 1.000    | 1.000   |
| CEBPD    | 101         | 0         | 0.00%         | 196          | 0         | 0.00%         | 1.00 [0e+00-Inf]     | 1.000    | 1.000   |
| CELF3    | 101         | 0         | 0.00%         | 196          | 0         | 0.00%         | 1.00 [0e+00-Inf]     | 1.000    | 1.000   |
| CELF6    | 101         | 0         | 0.00%         | 196          | 0         | 0.00%         | 1.00 [0e+00-Inf]     | 1.000    | 1.000   |
| CEMP1    | 101         | 0         | 0.00%         | 196          | 0         | 0.00%         | 1.00 [0e+00-Inf]     | 1.000    | 1.000   |
| CENPF    | 101         | 0         | 0.00%         | 196          | 0         | 0.00%         | 1.00 [0e+00-Inf]     | 1.000    | 1.000   |
| CENPL    | 101         | 0         | 0.00%         | 196          | 0         | 0.00%         | 1.00 [0e+00-Inf]     | 1.000    | 1.000   |
| CEP170   | 101         | 0         | 0.00%         | 196          | 0         | 0.00%         | 1.00 [0e+00-Inf]     | 1.000    | 1.000   |
| CEP250   | 101         | 0         | 0.00%         | 196          | 0         | 0.00%         | 1.00 [0e+00-Inf]     | 1.000    | 1.000   |
| CEP290   | 101         | 0         | 0.00%         | 196          | 0         | 0.00%         | 1.00 [0e+00-Inf]     | 1.000    | 1.000   |
| CEP350   | 101         | 0         | 0.00%         | 196          | 0         | 0.00%         | 1.00 [0e+00-Inf]     | 1.000    | 1.000   |
| CFHR1    | 101         | 0         | 0.00%         | 196          | 0         | 0.00%         | 1.00 [0e+00-Inf]     | 1.000    | 1.000   |
| CFHR2    | 101         | 0         | 0.00%         | 196          | 0         | 0.00%         | 1.00 [0e+00-Inf]     | 1.000    | 1.000   |
| CFHR3    | 101         | 0         | 0.00%         | 196          | 0         | 0.00%         | 1.00 [0e+00-Inf]     | 1.000    | 1.000   |
| CFHR4    | 101         | 0         | 0.00%         | 196          | 0         | 0.00%         | 1.00 [0e+00-Inf]     | 1.000    | 1.000   |
| CFHR5    | 101         | 0         | 0.00%         | 196          | 0         | 0.00%         | 1.00 [0e+00-Inf]     | 1.000    | 1.000   |
| CFH      | 101         | 0         | 0.00%         | 196          | 0         | 0.00%         | 1.00 [0e+00-Inf]     | 1.000    | 1.000   |
| CFL2     | 101         | 0         | 0.00%         | 196          | 0         | 0.00%         | 1.00 [0e+00-Inf]     | 1.000    | 1.000   |
| CGN      | 101         | 0         | 0.00%         | 196          | 0         | 0.00%         | 1.00 [0e+00-Inf]     | 1.000    | 1.000   |
| CHAD     | 101         | 0         | 0.00%         | 196          | 0         | 0.00%         | 1.00 [0e+00-Inf]     | 1.000    | 1.000   |
| CHCHD1   | 101         | 0         | 0.00%         | 196          | 0         | 0.00%         | 1.00 [0e+00-Inf]     | 1.000    | 1.000   |
| CHCHD7   | 101         | 0         | 0.00%         | 196          | 0         | 0.00%         | 1.00 [0e+00-Inf]     | 1.000    | 1.000   |
| COA4     | 101         | 0         | 0.00%         | 196          | 0         | 0.00%         | 1.00 [0e+00-Inf]     | 1.000    | 1.000   |
| CHD1L    | 101         | 0         | 0.00%         | 196          | 0         | 0.00%         | 1.00 [0e+00-Inf]     | 1.000    | 1.000   |
| CHD2     | 101         | 0         | 0.00%         | 196          | 0         | 0.00%         | 1.00 [0e+00-Inf]     | 1.000    | 1.000   |
| CHD6     | 101         | 0         | 0.00%         | 196          | 0         | 0.00%         | 1.00 [0e+00-Inf]     | 1.000    | 1.000   |
| CHD7     | 101         | 0         | 0.00%         | 196          | 0         | 0.00%         | 1.00 [0e+00-Inf]     | 1.000    | 1.000   |
| CHI3L1   | 101         | 0         | 0.00%         | 196          | 0         | 0.00%         | 1.00 [0e+00-Inf]     | 1.000    | 1.000   |
| CHIT1    | 101         | 0         | 0.00%         | 196          | 0         | 0.00%         | 1.00 [0e+00-Inf]     | 1.000    | 1.000   |
| CHKA     | 101         | 0         | 0.00%         | 196          | 0         | 0.00%         | 1.00 [0e+00-Inf]     | 1.000    | 1.000   |
| CHML     | 101         | 0         | 0.00%         | 196          | 0         | 0.00%         | 1.00 [0e+00-Inf]     | 1.000    | 1.000   |
| CHMP4C   | 101         | 0         | 0.00%         | 196          | 0         | 0.00%         | 1.00 [0e+00-Inf]     | 1.000    | 1.000   |
| CHMP6    | 101         | 0         | 0.00%         | 196          | 0         | 0.00%         | 1.00 [0e+00-Inf]     | 1.000    | 1.000   |
| CHN2     | 101         | 0         | 0.00%         | 196          | 0         | 0.00%         | 1.00 [0e+00-Inf]     | 1.000    | 1.000   |
| CHORDC1  | 101         | 0         | 0.00%         | 196          | 0         | 0.00%         | 1.00 [0e+00-Inf]     | 1.000    | 1.000   |
| CHP2     | 101         | 0         | 0.00%         | 196          | 0         | 0.00%         | 1.00 [0e+00-Inf]     | 1.000    | 1.000   |
| CHRAC1   | 101         | 0         | 0.00%         | 196          | 0         | 0.00%         | 1.00 [0e+00-Inf]     | 1.000    | 1.000   |
| CHRDL2   | 101         | 0         | 0.00%         | 196          | 0         | 0.00%         | 1.00 [0e+00-Inf]     | 1.000    | 1.000   |
| CHRD     | 101         | 0         | 0.00%         | 196          | 0         | 0.00%         | 1.00 [0e+00-Inf]     | 1.000    | 1.000   |
| CHRM3    | 101         | 0         | 0.00%         | 196          | 0         | 0.00%         | 1.00 [0e+00-Inf]     | 1.000    | 1.000   |
| CHRNA4   | 101         | 0         | 0.00%         | 196          | 0         | 0.00%         | 1.00 [0e+00-Inf]     | 1.000    | 1.000   |
| CHRNA6   | 101         | 0         | 0.00%         | 196          | 0         | 0.00%         | 1.00 [0e+00-Inf]     | 1.000    | 1.000   |
| CHRN2    | 101         | 0         | 0.00%         | 196          | 0         | 0.00%         | 1.00 [0e+00-Inf]     | 1.000    | 1.000   |
| CHRN3    | 101         | 0         | 0.00%         | 196          | 0         | 0.00%         | 1.00 [0e+00-Inf]     | 1.000    | 1.000   |
| CHTF18   | 101         | 0         | 0.00%         | 196          | 0         | 0.00%         | 1.00 [0e+00-Inf]     | 1.000    | 1.000   |
| CIB1     | 101         | 0         | 0.00%         | 196          | 0         | 0.00%         | 1.00 [0e+00-Inf]     | 1.000    | 1.000   |
| CIB2     | 101         | 0         | 0.00%         | 196          | 0         | 0.00%         | 1.00 [0e+00-Inf]     | 1.000    | 1.000   |
| CIITA    | 101         | 0         | 0.00%         | 196          | 0         | 0.00%         | 1.00 [0e+00-Inf]     | 1.000    | 1.000   |
| CISD3    | 101         | 0         | 0.00%         | 196          | 0         | 0.00%         | 1.00 [0e+00-Inf]     | 1.000    | 1.000   |
| CKS1B    | 101         | 0         | 0.00%         | 196          | 0         | 0.00%         | 1.00 [0e+00-Inf]     | 1.000    | 1.000   |
| CLCF1    | 101         | 0         | 0.00%         | 196          | 0         | 0.00%         | 1.00 [0e+00-Inf]     | 1.000    | 1.000   |
| CLCN2    | 101         | 0         | 0.00%         | 196          | 0         | 0.00%         | 1.00 [0e+00-Inf]     | 1.000    | 1.000   |
| CLCN7    | 101         | 0         | 0.00%         | 196          | 0         | 0.00%         | 1.00 [0e+00-Inf]     | 1.000    | 1.000   |
| CLDN11   | 101         | 0         | 0.00%         | 196          | 0         | 0.00%         | 1.00 [0e+00-Inf]     | 1.000    | 1.000   |
| CLDN16   | 101         | 0         | 0.00%         | 196          | 0         | 0.00%         | 1.00 [0e+00-Inf]     | 1.000    | 1.000   |



| Symbol   | CINSARC Low |           |               | CINSARC High |           |               | CINSARC High vs. Low |          |         |
|----------|-------------|-----------|---------------|--------------|-----------|---------------|----------------------|----------|---------|
|          | N tested    | N altered | Fq alteration | N tested     | N altered | Fq alteration | OR [95%CI]           | p-value* | q-value |
| CRABP2   | 101         | 0         | 0.00%         | 196          | 0         | 0.00%         | 1.00 [0e+00-Inf]     | 1.000    | 1.000   |
| CRB1     | 101         | 0         | 0.00%         | 196          | 0         | 0.00%         | 1.00 [0e+00-Inf]     | 1.000    | 1.000   |
| CRCT1    | 101         | 0         | 0.00%         | 196          | 0         | 0.00%         | 1.00 [0e+00-Inf]     | 1.000    | 1.000   |
| CREB3L4  | 101         | 0         | 0.00%         | 196          | 0         | 0.00%         | 1.00 [0e+00-Inf]     | 1.000    | 1.000   |
| CREB5    | 101         | 0         | 0.00%         | 196          | 0         | 0.00%         | 1.00 [0e+00-Inf]     | 1.000    | 1.000   |
| CREBBP   | 101         | 0         | 0.00%         | 196          | 0         | 0.00%         | 1.00 [0e+00-Inf]     | 1.000    | 1.000   |
| CREBZF   | 101         | 0         | 0.00%         | 196          | 0         | 0.00%         | 1.00 [0e+00-Inf]     | 1.000    | 1.000   |
| CREG1    | 101         | 0         | 0.00%         | 196          | 0         | 0.00%         | 1.00 [0e+00-Inf]     | 1.000    | 1.000   |
| CRHR2    | 101         | 0         | 0.00%         | 196          | 0         | 0.00%         | 1.00 [0e+00-Inf]     | 1.000    | 1.000   |
| CRH      | 101         | 0         | 0.00%         | 196          | 0         | 0.00%         | 1.00 [0e+00-Inf]     | 1.000    | 1.000   |
| CRISPLD1 | 101         | 0         | 0.00%         | 196          | 0         | 0.00%         | 1.00 [0e+00-Inf]     | 1.000    | 1.000   |
| CRLF3    | 101         | 0         | 0.00%         | 196          | 0         | 0.00%         | 1.00 [0e+00-Inf]     | 1.000    | 1.000   |
| CRNN     | 101         | 0         | 0.00%         | 196          | 0         | 0.00%         | 1.00 [0e+00-Inf]     | 1.000    | 1.000   |
| CRP      | 101         | 0         | 0.00%         | 196          | 0         | 0.00%         | 1.00 [0e+00-Inf]     | 1.000    | 1.000   |
| CRTC2    | 101         | 0         | 0.00%         | 196          | 0         | 0.00%         | 1.00 [0e+00-Inf]     | 1.000    | 1.000   |
| CRTC3    | 101         | 0         | 0.00%         | 196          | 0         | 0.00%         | 1.00 [0e+00-Inf]     | 1.000    | 1.000   |
| CRYBA1   | 101         | 0         | 0.00%         | 196          | 0         | 0.00%         | 1.00 [0e+00-Inf]     | 1.000    | 1.000   |
| CRYM     | 101         | 0         | 0.00%         | 196          | 0         | 0.00%         | 1.00 [0e+00-Inf]     | 1.000    | 1.000   |
| YBX3P1   | 101         | 0         | 0.00%         | 196          | 0         | 0.00%         | 1.00 [0e+00-Inf]     | 1.000    | 1.000   |
| CSE1L    | 101         | 0         | 0.00%         | 196          | 0         | 0.00%         | 1.00 [0e+00-Inf]     | 1.000    | 1.000   |
| CSF3     | 101         | 0         | 0.00%         | 196          | 0         | 0.00%         | 1.00 [0e+00-Inf]     | 1.000    | 1.000   |
| CSH1     | 101         | 0         | 0.00%         | 196          | 0         | 0.00%         | 1.00 [0e+00-Inf]     | 1.000    | 1.000   |
| CSH2     | 101         | 0         | 0.00%         | 196          | 0         | 0.00%         | 1.00 [0e+00-Inf]     | 1.000    | 1.000   |
| CSHL1    | 101         | 0         | 0.00%         | 196          | 0         | 0.00%         | 1.00 [0e+00-Inf]     | 1.000    | 1.000   |
| CSMD1    | 101         | 3         | 2.97%         | 196          | 3         | 1.53%         | 0.51 [0.13-1.98]     | 0.412    | 1.000   |
| CSMD3    | 101         | 0         | 0.00%         | 196          | 0         | 0.00%         | 1.00 [0e+00-Inf]     | 1.000    | 1.000   |
| CSNK1D   | 101         | 0         | 0.00%         | 196          | 0         | 0.00%         | 1.00 [0e+00-Inf]     | 1.000    | 1.000   |
| CSPP1    | 101         | 0         | 0.00%         | 196          | 0         | 0.00%         | 1.00 [0e+00-Inf]     | 1.000    | 1.000   |
| CSR1     | 101         | 0         | 0.00%         | 196          | 0         | 0.00%         | 1.00 [0e+00-Inf]     | 1.000    | 1.000   |
| CSR2     | 101         | 0         | 0.00%         | 196          | 0         | 0.00%         | 1.00 [0e+00-Inf]     | 1.000    | 1.000   |
| CSR3     | 101         | 0         | 0.00%         | 196          | 0         | 0.00%         | 1.00 [0e+00-Inf]     | 1.000    | 1.000   |
| CST6     | 101         | 0         | 0.00%         | 196          | 0         | 0.00%         | 1.00 [0e+00-Inf]     | 1.000    | 1.000   |
| CSTF1    | 101         | 0         | 0.00%         | 196          | 0         | 0.00%         | 1.00 [0e+00-Inf]     | 1.000    | 1.000   |
| CTAGE4   | 101         | 0         | 0.00%         | 196          | 0         | 0.00%         | 1.00 [0e+00-Inf]     | 1.000    | 1.000   |
| CTAGE6   | 101         | 0         | 0.00%         | 196          | 0         | 0.00%         | 1.00 [0e+00-Inf]     | 1.000    | 1.000   |
| CTCFL    | 101         | 0         | 0.00%         | 196          | 0         | 0.00%         | 1.00 [0e+00-Inf]     | 1.000    | 1.000   |
| CTDSP2   | 101         | 0         | 0.00%         | 196          | 0         | 0.00%         | 1.00 [0e+00-Inf]     | 1.000    | 1.000   |
| CTF1     | 101         | 0         | 0.00%         | 196          | 0         | 0.00%         | 1.00 [0e+00-Inf]     | 1.000    | 1.000   |
| CTHRC1   | 101         | 0         | 0.00%         | 196          | 0         | 0.00%         | 1.00 [0e+00-Inf]     | 1.000    | 1.000   |
| CTNBL1   | 101         | 0         | 0.00%         | 196          | 0         | 0.00%         | 1.00 [0e+00-Inf]     | 1.000    | 1.000   |
| CTSA     | 101         | 0         | 0.00%         | 196          | 0         | 0.00%         | 1.00 [0e+00-Inf]     | 1.000    | 1.000   |
| CTSC     | 101         | 0         | 0.00%         | 196          | 0         | 0.00%         | 1.00 [0e+00-Inf]     | 1.000    | 1.000   |
| CTSE     | 101         | 0         | 0.00%         | 196          | 0         | 0.00%         | 1.00 [0e+00-Inf]     | 1.000    | 1.000   |
| CTSF     | 101         | 0         | 0.00%         | 196          | 0         | 0.00%         | 1.00 [0e+00-Inf]     | 1.000    | 1.000   |
| CTSK     | 101         | 0         | 0.00%         | 196          | 0         | 0.00%         | 1.00 [0e+00-Inf]     | 1.000    | 1.000   |
| CTSS     | 101         | 0         | 0.00%         | 196          | 0         | 0.00%         | 1.00 [0e+00-Inf]     | 1.000    | 1.000   |
| CTS2     | 101         | 0         | 0.00%         | 196          | 0         | 0.00%         | 1.00 [0e+00-Inf]     | 1.000    | 1.000   |
| CTTN     | 101         | 0         | 0.00%         | 196          | 0         | 0.00%         | 1.00 [0e+00-Inf]     | 1.000    | 1.000   |
| CUEDC1   | 101         | 0         | 0.00%         | 196          | 0         | 0.00%         | 1.00 [0e+00-Inf]     | 1.000    | 1.000   |
| CWC25    | 101         | 0         | 0.00%         | 196          | 0         | 0.00%         | 1.00 [0e+00-Inf]     | 1.000    | 1.000   |
| CXADRP2  | 101         | 0         | 0.00%         | 196          | 0         | 0.00%         | 1.00 [0e+00-Inf]     | 1.000    | 1.000   |
| CXCL10   | 101         | 0         | 0.00%         | 196          | 0         | 0.00%         | 1.00 [0e+00-Inf]     | 1.000    | 1.000   |
| CXCL11   | 101         | 0         | 0.00%         | 196          | 0         | 0.00%         | 1.00 [0e+00-Inf]     | 1.000    | 1.000   |
| CXCL1    | 101         | 0         | 0.00%         | 196          | 0         | 0.00%         | 1.00 [0e+00-Inf]     | 1.000    | 1.000   |
| CXCL2    | 101         | 0         | 0.00%         | 196          | 0         | 0.00%         | 1.00 [0e+00-Inf]     | 1.000    | 1.000   |
| CXCL3    | 101         | 0         | 0.00%         | 196          | 0         | 0.00%         | 1.00 [0e+00-Inf]     | 1.000    | 1.000   |
| CXCL5    | 101         | 0         | 0.00%         | 196          | 0         | 0.00%         | 1.00 [0e+00-Inf]     | 1.000    | 1.000   |
| CXCL6    | 101         | 0         | 0.00%         | 196          | 0         | 0.00%         | 1.00 [0e+00-Inf]     | 1.000    | 1.000   |
| CXCL9    | 101         | 0         | 0.00%         | 196          | 0         | 0.00%         | 1.00 [0e+00-Inf]     | 1.000    | 1.000   |
| CYB561   | 101         | 0         | 0.00%         | 196          | 0         | 0.00%         | 1.00 [0e+00-Inf]     | 1.000    | 1.000   |
| CYB5R1   | 101         | 0         | 0.00%         | 196          | 0         | 0.00%         | 1.00 [0e+00-Inf]     | 1.000    | 1.000   |
| CYB561A3 | 101         | 0         | 0.00%         | 196          | 0         | 0.00%         | 1.00 [0e+00-Inf]     | 1.000    | 1.000   |
| CYC1     | 101         | 0         | 0.00%         | 196          | 0         | 0.00%         | 1.00 [0e+00-Inf]     | 1.000    | 1.000   |
| CYCSP52  | 101         | 0         | 0.00%         | 196          | 0         | 0.00%         | 1.00 [0e+00-Inf]     | 1.000    | 1.000   |
| CYCS     | 101         | 0         | 0.00%         | 196          | 0         | 0.00%         | 1.00 [0e+00-Inf]     | 1.000    | 1.000   |
| CYGB     | 101         | 0         | 0.00%         | 196          | 0         | 0.00%         | 1.00 [0e+00-Inf]     | 1.000    | 1.000   |
| CYHR1    | 101         | 0         | 0.00%         | 196          | 0         | 0.00%         | 1.00 [0e+00-Inf]     | 1.000    | 1.000   |
| CYP11B1  | 101         | 0         | 0.00%         | 196          | 0         | 0.00%         | 1.00 [0e+00-Inf]     | 1.000    | 1.000   |
| CYP11B2  | 101         | 0         | 0.00%         | 196          | 0         | 0.00%         | 1.00 [0e+00-Inf]     | 1.000    | 1.000   |
| CYP24A1  | 101         | 0         | 0.00%         | 196          | 0         | 0.00%         | 1.00 [0e+00-Inf]     | 1.000    | 1.000   |
| CYP27B1  | 101         | 0         | 0.00%         | 196          | 0         | 0.00%         | 1.00 [0e+00-Inf]     | 1.000    | 1.000   |

| Symbol      | CINSARC Low |           |               | CINSARC High |           |               | CINSARC High vs. Low |          |         |
|-------------|-------------|-----------|---------------|--------------|-----------|---------------|----------------------|----------|---------|
|             | N tested    | N altered | Fq alteration | N tested     | N altered | Fq alteration | OR [95%CI]           | p-value* | q-value |
| CYP7A1      | 101         | 0         | 0.00%         | 196          | 0         | 0.00%         | 1.00 [0e+00-Inf]     | 1.000    | 1.000   |
| CYP7B1      | 101         | 0         | 0.00%         | 196          | 0         | 0.00%         | 1.00 [0e+00-Inf]     | 1.000    | 1.000   |
| CYTH1       | 101         | 0         | 0.00%         | 196          | 0         | 0.00%         | 1.00 [0e+00-Inf]     | 1.000    | 1.000   |
| DAP3        | 101         | 0         | 0.00%         | 196          | 0         | 0.00%         | 1.00 [0e+00-Inf]     | 1.000    | 1.000   |
| DARS2       | 101         | 0         | 0.00%         | 196          | 0         | 0.00%         | 1.00 [0e+00-Inf]     | 1.000    | 1.000   |
| DAZ1        | 101         | 65        | 64.36%        | 196          | 117       | 59.69%        | 0.82 [0.54-1.25]     | 0.435    | 1.000   |
| DAZ2        | 101         | 65        | 64.36%        | 196          | 117       | 59.69%        | 0.82 [0.54-1.25]     | 0.435    | 1.000   |
| DAZ3        | 101         | 65        | 64.36%        | 196          | 117       | 59.69%        | 0.82 [0.54-1.25]     | 0.435    | 1.000   |
| DAZ4        | 101         | 65        | 64.36%        | 196          | 117       | 59.69%        | 0.82 [0.54-1.25]     | 0.435    | 1.000   |
| DBNDD2      | 101         | 0         | 0.00%         | 196          | 0         | 0.00%         | 1.00 [0e+00-Inf]     | 1.000    | 1.000   |
| DCAF13      | 101         | 0         | 0.00%         | 196          | 0         | 0.00%         | 1.00 [0e+00-Inf]     | 1.000    | 1.000   |
| DCAF4L2     | 101         | 0         | 0.00%         | 196          | 0         | 0.00%         | 1.00 [0e+00-Inf]     | 1.000    | 1.000   |
| DCAF6       | 101         | 0         | 0.00%         | 196          | 0         | 0.00%         | 1.00 [0e+00-Inf]     | 1.000    | 1.000   |
| DCAF7       | 101         | 0         | 0.00%         | 196          | 0         | 0.00%         | 1.00 [0e+00-Inf]     | 1.000    | 1.000   |
| DCAF8       | 101         | 0         | 0.00%         | 196          | 0         | 0.00%         | 1.00 [0e+00-Inf]     | 1.000    | 1.000   |
| ECI1        | 101         | 0         | 0.00%         | 196          | 0         | 0.00%         | 1.00 [0e+00-Inf]     | 1.000    | 1.000   |
| DCN         | 101         | 0         | 0.00%         | 196          | 0         | 0.00%         | 1.00 [0e+00-Inf]     | 1.000    | 1.000   |
| DCST1       | 101         | 0         | 0.00%         | 196          | 0         | 0.00%         | 1.00 [0e+00-Inf]     | 1.000    | 1.000   |
| DCST2       | 101         | 0         | 0.00%         | 196          | 0         | 0.00%         | 1.00 [0e+00-Inf]     | 1.000    | 1.000   |
| DCTN3       | 101         | 0         | 0.00%         | 196          | 0         | 0.00%         | 1.00 [0e+00-Inf]     | 1.000    | 1.000   |
| DCTN5       | 101         | 0         | 0.00%         | 196          | 0         | 0.00%         | 1.00 [0e+00-Inf]     | 1.000    | 1.000   |
| DCTPP1      | 101         | 0         | 0.00%         | 196          | 0         | 0.00%         | 1.00 [0e+00-Inf]     | 1.000    | 1.000   |
| DCUN1D1     | 101         | 0         | 0.00%         | 196          | 0         | 0.00%         | 1.00 [0e+00-Inf]     | 1.000    | 1.000   |
| DCUN1D3     | 101         | 0         | 0.00%         | 196          | 0         | 0.00%         | 1.00 [0e+00-Inf]     | 1.000    | 1.000   |
| DCXR        | 101         | 0         | 0.00%         | 196          | 0         | 0.00%         | 1.00 [0e+00-Inf]     | 1.000    | 1.000   |
| DDB1        | 101         | 0         | 0.00%         | 196          | 0         | 0.00%         | 1.00 [0e+00-Inf]     | 1.000    | 1.000   |
| DDHD2       | 101         | 0         | 0.00%         | 196          | 0         | 0.00%         | 1.00 [0e+00-Inf]     | 1.000    | 1.000   |
| DDR2        | 101         | 0         | 0.00%         | 196          | 0         | 0.00%         | 1.00 [0e+00-Inf]     | 1.000    | 1.000   |
| DDX27       | 101         | 0         | 0.00%         | 196          | 0         | 0.00%         | 1.00 [0e+00-Inf]     | 1.000    | 1.000   |
| DDX3Y       | 101         | 64        | 63.37%        | 196          | 115       | 58.67%        | 0.82 [0.54-1.24]     | 0.434    | 1.000   |
| DDX42       | 101         | 0         | 0.00%         | 196          | 0         | 0.00%         | 1.00 [0e+00-Inf]     | 1.000    | 1.000   |
| DDX52       | 101         | 0         | 0.00%         | 196          | 0         | 0.00%         | 1.00 [0e+00-Inf]     | 1.000    | 1.000   |
| DDX59       | 101         | 0         | 0.00%         | 196          | 0         | 0.00%         | 1.00 [0e+00-Inf]     | 1.000    | 1.000   |
| DDX5        | 101         | 0         | 0.00%         | 196          | 0         | 0.00%         | 1.00 [0e+00-Inf]     | 1.000    | 1.000   |
| DECR1       | 101         | 0         | 0.00%         | 196          | 0         | 0.00%         | 1.00 [0e+00-Inf]     | 1.000    | 1.000   |
| DECR2       | 101         | 0         | 0.00%         | 196          | 0         | 0.00%         | 1.00 [0e+00-Inf]     | 1.000    | 1.000   |
| DEDD        | 101         | 0         | 0.00%         | 196          | 0         | 0.00%         | 1.00 [0e+00-Inf]     | 1.000    | 1.000   |
| DEFB108B    | 101         | 0         | 0.00%         | 196          | 0         | 0.00%         | 1.00 [0e+00-Inf]     | 1.000    | 1.000   |
| DEGS1       | 101         | 0         | 0.00%         | 196          | 0         | 0.00%         | 1.00 [0e+00-Inf]     | 1.000    | 1.000   |
| DENND1B     | 101         | 0         | 0.00%         | 196          | 0         | 0.00%         | 1.00 [0e+00-Inf]     | 1.000    | 1.000   |
| DENND3      | 101         | 0         | 0.00%         | 196          | 0         | 0.00%         | 1.00 [0e+00-Inf]     | 1.000    | 1.000   |
| DENND4B     | 101         | 0         | 0.00%         | 196          | 0         | 0.00%         | 1.00 [0e+00-Inf]     | 1.000    | 1.000   |
| DEPTOR      | 101         | 0         | 0.00%         | 196          | 0         | 0.00%         | 1.00 [0e+00-Inf]     | 1.000    | 1.000   |
| DERL1       | 101         | 0         | 0.00%         | 196          | 0         | 0.00%         | 1.00 [0e+00-Inf]     | 1.000    | 1.000   |
| DET1        | 101         | 0         | 0.00%         | 196          | 0         | 0.00%         | 1.00 [0e+00-Inf]     | 1.000    | 1.000   |
| DEXI        | 101         | 0         | 0.00%         | 196          | 0         | 0.00%         | 1.00 [0e+00-Inf]     | 1.000    | 1.000   |
| DGAT1       | 101         | 0         | 0.00%         | 196          | 0         | 0.00%         | 1.00 [0e+00-Inf]     | 1.000    | 1.000   |
| DGAT2       | 101         | 0         | 0.00%         | 196          | 0         | 0.00%         | 1.00 [0e+00-Inf]     | 1.000    | 1.000   |
| DGKE        | 101         | 0         | 0.00%         | 196          | 0         | 0.00%         | 1.00 [0e+00-Inf]     | 1.000    | 1.000   |
| DHCR7       | 101         | 0         | 0.00%         | 196          | 0         | 0.00%         | 1.00 [0e+00-Inf]     | 1.000    | 1.000   |
| DHRS11      | 101         | 0         | 0.00%         | 196          | 0         | 0.00%         | 1.00 [0e+00-Inf]     | 1.000    | 1.000   |
| DHRS13      | 101         | 0         | 0.00%         | 196          | 0         | 0.00%         | 1.00 [0e+00-Inf]     | 1.000    | 1.000   |
| DHX35       | 101         | 0         | 0.00%         | 196          | 0         | 0.00%         | 1.00 [0e+00-Inf]     | 1.000    | 1.000   |
| DHX40       | 101         | 0         | 0.00%         | 196          | 0         | 0.00%         | 1.00 [0e+00-Inf]     | 1.000    | 1.000   |
| DHX9        | 101         | 0         | 0.00%         | 196          | 0         | 0.00%         | 1.00 [0e+00-Inf]     | 1.000    | 1.000   |
| DIDO1       | 101         | 0         | 0.00%         | 196          | 0         | 0.00%         | 1.00 [0e+00-Inf]     | 1.000    | 1.000   |
| DISC1       | 101         | 0         | 0.00%         | 196          | 0         | 0.00%         | 1.00 [0e+00-Inf]     | 1.000    | 1.000   |
| DISC2       | 101         | 0         | 0.00%         | 196          | 0         | 0.00%         | 1.00 [0e+00-Inf]     | 1.000    | 1.000   |
| DISP1       | 101         | 0         | 0.00%         | 196          | 0         | 0.00%         | 1.00 [0e+00-Inf]     | 1.000    | 1.000   |
| DKFZP586114 | 101         | 0         | 0.00%         | 196          | 0         | 0.00%         | 1.00 [0e+00-Inf]     | 1.000    | 1.000   |
| NCR3LG1     | 101         | 0         | 0.00%         | 196          | 0         | 0.00%         | 1.00 [0e+00-Inf]     | 1.000    | 1.000   |
| DKK4        | 101         | 0         | 0.00%         | 196          | 0         | 0.00%         | 1.00 [0e+00-Inf]     | 1.000    | 1.000   |
| DLG1        | 101         | 0         | 0.00%         | 196          | 0         | 0.00%         | 1.00 [0e+00-Inf]     | 1.000    | 1.000   |
| DLGAP4      | 101         | 0         | 0.00%         | 196          | 0         | 0.00%         | 1.00 [0e+00-Inf]     | 1.000    | 1.000   |
| DLX3        | 101         | 0         | 0.00%         | 196          | 0         | 0.00%         | 1.00 [0e+00-Inf]     | 1.000    | 1.000   |
| DLX4        | 101         | 0         | 0.00%         | 196          | 0         | 0.00%         | 1.00 [0e+00-Inf]     | 1.000    | 1.000   |
| DNAH11      | 101         | 0         | 0.00%         | 196          | 0         | 0.00%         | 1.00 [0e+00-Inf]     | 1.000    | 1.000   |
| DNAH14      | 101         | 0         | 0.00%         | 196          | 0         | 0.00%         | 1.00 [0e+00-Inf]     | 1.000    | 1.000   |
| DNAH17      | 101         | 0         | 0.00%         | 196          | 0         | 0.00%         | 1.00 [0e+00-Inf]     | 1.000    | 1.000   |
| DNAH3       | 101         | 0         | 0.00%         | 196          | 0         | 0.00%         | 1.00 [0e+00-Inf]     | 1.000    | 1.000   |
| DNAI2       | 101         | 0         | 0.00%         | 196          | 0         | 0.00%         | 1.00 [0e+00-Inf]     | 1.000    | 1.000   |

| Symbol    | CINSARC Low |           |               | CINSARC High |           |               | CINSARC High vs. Low |          |         |
|-----------|-------------|-----------|---------------|--------------|-----------|---------------|----------------------|----------|---------|
|           | N tested    | N altered | Fq alteration | N tested     | N altered | Fq alteration | OR [95%CI]           | p-value* | q-value |
| DNAJA3    | 101         | 0         | 0.00%         | 196          | 0         | 0.00%         | 1.00 [0e+00-Inf]     | 1.000    | 1.000   |
| DNAJB13   | 101         | 0         | 0.00%         | 196          | 0         | 0.00%         | 1.00 [0e+00-Inf]     | 1.000    | 1.000   |
| DNAJB5    | 101         | 0         | 0.00%         | 196          | 0         | 0.00%         | 1.00 [0e+00-Inf]     | 1.000    | 1.000   |
| DNAJB6    | 101         | 0         | 0.00%         | 196          | 0         | 0.00%         | 1.00 [0e+00-Inf]     | 1.000    | 1.000   |
| DNAJC19   | 101         | 0         | 0.00%         | 196          | 0         | 0.00%         | 1.00 [0e+00-Inf]     | 1.000    | 1.000   |
| DNAJCSB   | 101         | 0         | 0.00%         | 196          | 0         | 0.00%         | 1.00 [0e+00-Inf]     | 1.000    | 1.000   |
| DNAJCS    | 101         | 0         | 0.00%         | 196          | 0         | 0.00%         | 1.00 [0e+00-Inf]     | 1.000    | 1.000   |
| DNAJC9    | 101         | 0         | 0.00%         | 196          | 0         | 0.00%         | 1.00 [0e+00-Inf]     | 1.000    | 1.000   |
| DNASE1L2  | 101         | 0         | 0.00%         | 196          | 0         | 0.00%         | 1.00 [0e+00-Inf]     | 1.000    | 1.000   |
| DNASE1    | 101         | 0         | 0.00%         | 196          | 1         | 0.51%         | 3.2e+07 [0e+00-Inf]  | 0.997    | 1.000   |
| DNM3      | 101         | 0         | 0.00%         | 196          | 0         | 0.00%         | 1.00 [0e+00-Inf]     | 1.000    | 1.000   |
| DNTTIP1   | 101         | 0         | 0.00%         | 196          | 0         | 0.00%         | 1.00 [0e+00-Inf]     | 1.000    | 1.000   |
| DOC2A     | 101         | 0         | 0.00%         | 196          | 0         | 0.00%         | 1.00 [0e+00-Inf]     | 1.000    | 1.000   |
| DOK5      | 101         | 0         | 0.00%         | 196          | 0         | 0.00%         | 1.00 [0e+00-Inf]     | 1.000    | 1.000   |
| DPH3P1    | 101         | 0         | 0.00%         | 196          | 0         | 0.00%         | 1.00 [0e+00-Inf]     | 1.000    | 1.000   |
| DPM1      | 101         | 0         | 0.00%         | 196          | 0         | 0.00%         | 1.00 [0e+00-Inf]     | 1.000    | 1.000   |
| DPM3      | 101         | 0         | 0.00%         | 196          | 0         | 0.00%         | 1.00 [0e+00-Inf]     | 1.000    | 1.000   |
| DPP3      | 101         | 0         | 0.00%         | 196          | 0         | 0.00%         | 1.00 [0e+00-Inf]     | 1.000    | 1.000   |
| DPRXP4    | 101         | 0         | 0.00%         | 196          | 0         | 0.00%         | 1.00 [0e+00-Inf]     | 1.000    | 1.000   |
| DPT       | 101         | 0         | 0.00%         | 196          | 0         | 0.00%         | 1.00 [0e+00-Inf]     | 1.000    | 1.000   |
| DPY19L1   | 101         | 0         | 0.00%         | 196          | 0         | 0.00%         | 1.00 [0e+00-Inf]     | 1.000    | 1.000   |
| DPY19L2P1 | 101         | 0         | 0.00%         | 196          | 0         | 0.00%         | 1.00 [0e+00-Inf]     | 1.000    | 1.000   |
| DPY19L2   | 101         | 0         | 0.00%         | 196          | 0         | 0.00%         | 1.00 [0e+00-Inf]     | 1.000    | 1.000   |
| DPY19L4   | 101         | 0         | 0.00%         | 196          | 0         | 0.00%         | 1.00 [0e+00-Inf]     | 1.000    | 1.000   |
| DPYS      | 101         | 0         | 0.00%         | 196          | 0         | 0.00%         | 1.00 [0e+00-Inf]     | 1.000    | 1.000   |
| DSCC1     | 101         | 0         | 0.00%         | 196          | 0         | 0.00%         | 1.00 [0e+00-Inf]     | 1.000    | 1.000   |
| DSG1      | 101         | 0         | 0.00%         | 196          | 0         | 0.00%         | 1.00 [0e+00-Inf]     | 1.000    | 1.000   |
| DSG4      | 101         | 0         | 0.00%         | 196          | 0         | 0.00%         | 1.00 [0e+00-Inf]     | 1.000    | 1.000   |
| DSN1      | 101         | 0         | 0.00%         | 196          | 0         | 0.00%         | 1.00 [0e+00-Inf]     | 1.000    | 1.000   |
| DSTYK     | 101         | 0         | 0.00%         | 196          | 0         | 0.00%         | 1.00 [0e+00-Inf]     | 1.000    | 1.000   |
| DTL       | 101         | 0         | 0.00%         | 196          | 0         | 0.00%         | 1.00 [0e+00-Inf]     | 1.000    | 1.000   |
| DUPD1     | 101         | 0         | 0.00%         | 196          | 0         | 0.00%         | 1.00 [0e+00-Inf]     | 1.000    | 1.000   |
| DUS1L     | 101         | 0         | 0.00%         | 196          | 0         | 0.00%         | 1.00 [0e+00-Inf]     | 1.000    | 1.000   |
| DUSP10    | 101         | 0         | 0.00%         | 196          | 0         | 0.00%         | 1.00 [0e+00-Inf]     | 1.000    | 1.000   |
| DUSP12    | 101         | 0         | 0.00%         | 196          | 0         | 0.00%         | 1.00 [0e+00-Inf]     | 1.000    | 1.000   |
| DUSP13    | 101         | 0         | 0.00%         | 196          | 0         | 0.00%         | 1.00 [0e+00-Inf]     | 1.000    | 1.000   |
| DUSP14    | 101         | 0         | 0.00%         | 196          | 0         | 0.00%         | 1.00 [0e+00-Inf]     | 1.000    | 1.000   |
| DUSP23    | 101         | 0         | 0.00%         | 196          | 0         | 0.00%         | 1.00 [0e+00-Inf]     | 1.000    | 1.000   |
| DUSP26    | 101         | 0         | 0.00%         | 196          | 0         | 0.00%         | 1.00 [0e+00-Inf]     | 1.000    | 1.000   |
| DUSP27    | 101         | 0         | 0.00%         | 196          | 0         | 0.00%         | 1.00 [0e+00-Inf]     | 1.000    | 1.000   |
| DUSP5P1   | 101         | 0         | 0.00%         | 196          | 0         | 0.00%         | 1.00 [0e+00-Inf]     | 1.000    | 1.000   |
| DUSP6     | 101         | 0         | 0.00%         | 196          | 0         | 0.00%         | 1.00 [0e+00-Inf]     | 1.000    | 1.000   |
| DVL3      | 101         | 0         | 0.00%         | 196          | 0         | 0.00%         | 1.00 [0e+00-Inf]     | 1.000    | 1.000   |
| DYNLL2    | 101         | 0         | 0.00%         | 196          | 0         | 0.00%         | 1.00 [0e+00-Inf]     | 1.000    | 1.000   |
| DYNLRB1   | 101         | 0         | 0.00%         | 196          | 0         | 0.00%         | 1.00 [0e+00-Inf]     | 1.000    | 1.000   |
| DYRK2     | 101         | 0         | 0.00%         | 196          | 0         | 0.00%         | 1.00 [0e+00-Inf]     | 1.000    | 1.000   |
| DYRK3     | 101         | 0         | 0.00%         | 196          | 0         | 0.00%         | 1.00 [0e+00-Inf]     | 1.000    | 1.000   |
| PPP1R27   | 101         | 0         | 0.00%         | 196          | 0         | 0.00%         | 1.00 [0e+00-Inf]     | 1.000    | 1.000   |
| E2F5      | 101         | 0         | 0.00%         | 196          | 0         | 0.00%         | 1.00 [0e+00-Inf]     | 1.000    | 1.000   |
| E2F7      | 101         | 0         | 0.00%         | 196          | 0         | 0.00%         | 1.00 [0e+00-Inf]     | 1.000    | 1.000   |
| E2F8      | 101         | 0         | 0.00%         | 196          | 0         | 0.00%         | 1.00 [0e+00-Inf]     | 1.000    | 1.000   |
| E4F1      | 101         | 0         | 0.00%         | 196          | 0         | 0.00%         | 1.00 [0e+00-Inf]     | 1.000    | 1.000   |
| EAPP      | 101         | 0         | 0.00%         | 196          | 0         | 0.00%         | 1.00 [0e+00-Inf]     | 1.000    | 1.000   |
| EARS2     | 101         | 0         | 0.00%         | 196          | 0         | 0.00%         | 1.00 [0e+00-Inf]     | 1.000    | 1.000   |
| EBAG9     | 101         | 0         | 0.00%         | 196          | 0         | 0.00%         | 1.00 [0e+00-Inf]     | 1.000    | 1.000   |
| ECD       | 101         | 0         | 0.00%         | 196          | 0         | 0.00%         | 1.00 [0e+00-Inf]     | 1.000    | 1.000   |
| ECE2      | 101         | 0         | 0.00%         | 196          | 0         | 0.00%         | 1.00 [0e+00-Inf]     | 1.000    | 1.000   |
| ECM1      | 101         | 0         | 0.00%         | 196          | 0         | 0.00%         | 1.00 [0e+00-Inf]     | 1.000    | 1.000   |
| EDARADD   | 101         | 0         | 0.00%         | 196          | 0         | 0.00%         | 1.00 [0e+00-Inf]     | 1.000    | 1.000   |
| EDEM2     | 101         | 0         | 0.00%         | 196          | 0         | 0.00%         | 1.00 [0e+00-Inf]     | 1.000    | 1.000   |
| EDEM3     | 101         | 0         | 0.00%         | 196          | 0         | 0.00%         | 1.00 [0e+00-Inf]     | 1.000    | 1.000   |
| EDN3      | 101         | 0         | 0.00%         | 196          | 0         | 0.00%         | 1.00 [0e+00-Inf]     | 1.000    | 1.000   |
| EEA1      | 101         | 0         | 0.00%         | 196          | 0         | 0.00%         | 1.00 [0e+00-Inf]     | 1.000    | 1.000   |
| EED       | 101         | 0         | 0.00%         | 196          | 0         | 0.00%         | 1.00 [0e+00-Inf]     | 1.000    | 1.000   |
| EEF1A2    | 101         | 0         | 0.00%         | 196          | 0         | 0.00%         | 1.00 [0e+00-Inf]     | 1.000    | 1.000   |
| EEF1D     | 101         | 0         | 0.00%         | 196          | 0         | 0.00%         | 1.00 [0e+00-Inf]     | 1.000    | 1.000   |
| EEF2K     | 101         | 0         | 0.00%         | 196          | 0         | 0.00%         | 1.00 [0e+00-Inf]     | 1.000    | 1.000   |
| EFCAB1    | 101         | 0         | 0.00%         | 196          | 0         | 0.00%         | 1.00 [0e+00-Inf]     | 1.000    | 1.000   |
| EFCAB2    | 101         | 0         | 0.00%         | 196          | 0         | 0.00%         | 1.00 [0e+00-Inf]     | 1.000    | 1.000   |
| EFCAB3    | 101         | 0         | 0.00%         | 196          | 0         | 0.00%         | 1.00 [0e+00-Inf]     | 1.000    | 1.000   |
| EFCAB5    | 101         | 0         | 0.00%         | 196          | 0         | 0.00%         | 1.00 [0e+00-Inf]     | 1.000    | 1.000   |

| Symbol   | CINSARC Low |           |               | CINSARC High |           |               | CINSARC High vs. Low |          |         |
|----------|-------------|-----------|---------------|--------------|-----------|---------------|----------------------|----------|---------|
|          | N tested    | N altered | Fq alteration | N tested     | N altered | Fq alteration | OR [95%CI]           | p-value* | q-value |
| EFNA1    | 101         | 0         | 0.00%         | 196          | 0         | 0.00%         | 1.00 [0e+00-Inf]     | 1.000    | 1.000   |
| EFNA3    | 101         | 0         | 0.00%         | 196          | 0         | 0.00%         | 1.00 [0e+00-Inf]     | 1.000    | 1.000   |
| EFNA4    | 101         | 0         | 0.00%         | 196          | 0         | 0.00%         | 1.00 [0e+00-Inf]     | 1.000    | 1.000   |
| EFR3A    | 101         | 0         | 0.00%         | 196          | 0         | 0.00%         | 1.00 [0e+00-Inf]     | 1.000    | 1.000   |
| EGLN1    | 101         | 0         | 0.00%         | 196          | 0         | 0.00%         | 1.00 [0e+00-Inf]     | 1.000    | 1.000   |
| EGLN3    | 101         | 0         | 0.00%         | 196          | 0         | 0.00%         | 1.00 [0e+00-Inf]     | 1.000    | 1.000   |
| EHHADH   | 101         | 0         | 0.00%         | 196          | 0         | 0.00%         | 1.00 [0e+00-Inf]     | 1.000    | 1.000   |
| EIF1AD   | 101         | 0         | 0.00%         | 196          | 0         | 0.00%         | 1.00 [0e+00-Inf]     | 1.000    | 1.000   |
| EIF1AY   | 101         | 64        | 63.37%        | 196          | 116       | 59.18%        | 0.84 [0.55-1.27]     | 0.485    | 1.000   |
| EIF2B5   | 101         | 0         | 0.00%         | 196          | 0         | 0.00%         | 1.00 [0e+00-Inf]     | 1.000    | 1.000   |
| AGO2     | 101         | 0         | 0.00%         | 196          | 0         | 0.00%         | 1.00 [0e+00-Inf]     | 1.000    | 1.000   |
| EIF3CL   | 101         | 0         | 0.00%         | 196          | 0         | 0.00%         | 1.00 [0e+00-Inf]     | 1.000    | 1.000   |
| EIF3C    | 101         | 0         | 0.00%         | 196          | 0         | 0.00%         | 1.00 [0e+00-Inf]     | 1.000    | 1.000   |
| EIF3E    | 101         | 0         | 0.00%         | 196          | 0         | 0.00%         | 1.00 [0e+00-Inf]     | 1.000    | 1.000   |
| EIF3H    | 101         | 0         | 0.00%         | 196          | 0         | 0.00%         | 1.00 [0e+00-Inf]     | 1.000    | 1.000   |
| EIF4A3   | 101         | 0         | 0.00%         | 196          | 0         | 0.00%         | 1.00 [0e+00-Inf]     | 1.000    | 1.000   |
| EIF4EBP1 | 101         | 0         | 0.00%         | 196          | 0         | 0.00%         | 1.00 [0e+00-Inf]     | 1.000    | 1.000   |
| EIF4G1   | 101         | 0         | 0.00%         | 196          | 0         | 0.00%         | 1.00 [0e+00-Inf]     | 1.000    | 1.000   |
| EIF6     | 101         | 0         | 0.00%         | 196          | 0         | 0.00%         | 1.00 [0e+00-Inf]     | 1.000    | 1.000   |
| ELF3     | 101         | 0         | 0.00%         | 196          | 0         | 0.00%         | 1.00 [0e+00-Inf]     | 1.000    | 1.000   |
| ELK4     | 101         | 0         | 0.00%         | 196          | 0         | 0.00%         | 1.00 [0e+00-Inf]     | 1.000    | 1.000   |
| ELMO2    | 101         | 0         | 0.00%         | 196          | 0         | 0.00%         | 1.00 [0e+00-Inf]     | 1.000    | 1.000   |
| EME1     | 101         | 0         | 0.00%         | 196          | 0         | 0.00%         | 1.00 [0e+00-Inf]     | 1.000    | 1.000   |
| EME2     | 101         | 0         | 0.00%         | 196          | 0         | 0.00%         | 1.00 [0e+00-Inf]     | 1.000    | 1.000   |
| EMILIN3  | 101         | 0         | 0.00%         | 196          | 0         | 0.00%         | 1.00 [0e+00-Inf]     | 1.000    | 1.000   |
| EMP2     | 101         | 0         | 0.00%         | 196          | 0         | 0.00%         | 1.00 [0e+00-Inf]     | 1.000    | 1.000   |
| ENAH     | 101         | 0         | 0.00%         | 196          | 0         | 0.00%         | 1.00 [0e+00-Inf]     | 1.000    | 1.000   |
| ENGASE   | 101         | 0         | 0.00%         | 196          | 0         | 0.00%         | 1.00 [0e+00-Inf]     | 1.000    | 1.000   |
| ENHO     | 101         | 0         | 0.00%         | 196          | 0         | 0.00%         | 1.00 [0e+00-Inf]     | 1.000    | 1.000   |
| ENPP2    | 101         | 0         | 0.00%         | 196          | 0         | 0.00%         | 1.00 [0e+00-Inf]     | 1.000    | 1.000   |
| ENPP7    | 101         | 0         | 0.00%         | 196          | 0         | 0.00%         | 1.00 [0e+00-Inf]     | 1.000    | 1.000   |
| ENSA     | 101         | 0         | 0.00%         | 196          | 0         | 0.00%         | 1.00 [0e+00-Inf]     | 1.000    | 1.000   |
| ENY2     | 101         | 0         | 0.00%         | 196          | 0         | 0.00%         | 1.00 [0e+00-Inf]     | 1.000    | 1.000   |
| EPB41L1  | 101         | 0         | 0.00%         | 196          | 0         | 0.00%         | 1.00 [0e+00-Inf]     | 1.000    | 1.000   |
| EPGN     | 101         | 0         | 0.00%         | 196          | 0         | 0.00%         | 1.00 [0e+00-Inf]     | 1.000    | 1.000   |
| EPHB3    | 101         | 0         | 0.00%         | 196          | 0         | 0.00%         | 1.00 [0e+00-Inf]     | 1.000    | 1.000   |
| EPHB6    | 101         | 0         | 0.00%         | 196          | 0         | 0.00%         | 1.00 [0e+00-Inf]     | 1.000    | 1.000   |
| EPHX1    | 101         | 0         | 0.00%         | 196          | 0         | 0.00%         | 1.00 [0e+00-Inf]     | 1.000    | 1.000   |
| EPN1     | 101         | 0         | 0.00%         | 196          | 0         | 0.00%         | 1.00 [0e+00-Inf]     | 1.000    | 1.000   |
| EPN2     | 101         | 0         | 0.00%         | 196          | 0         | 0.00%         | 1.00 [0e+00-Inf]     | 1.000    | 1.000   |
| EPN3     | 101         | 0         | 0.00%         | 196          | 0         | 0.00%         | 1.00 [0e+00-Inf]     | 1.000    | 1.000   |
| EPPK1    | 101         | 0         | 0.00%         | 196          | 0         | 0.00%         | 1.00 [0e+00-Inf]     | 1.000    | 1.000   |
| EPRS     | 101         | 0         | 0.00%         | 196          | 0         | 0.00%         | 1.00 [0e+00-Inf]     | 1.000    | 1.000   |
| EPX      | 101         | 0         | 0.00%         | 196          | 0         | 0.00%         | 1.00 [0e+00-Inf]     | 1.000    | 1.000   |
| ERAL1    | 101         | 0         | 0.00%         | 196          | 0         | 0.00%         | 1.00 [0e+00-Inf]     | 1.000    | 1.000   |
| ERBB2    | 101         | 0         | 0.00%         | 196          | 0         | 0.00%         | 1.00 [0e+00-Inf]     | 1.000    | 1.000   |
| ERCC4    | 101         | 0         | 0.00%         | 196          | 0         | 0.00%         | 1.00 [0e+00-Inf]     | 1.000    | 1.000   |
| EREG     | 101         | 0         | 0.00%         | 196          | 0         | 0.00%         | 1.00 [0e+00-Inf]     | 1.000    | 1.000   |
| ERL2     | 101         | 0         | 0.00%         | 196          | 0         | 0.00%         | 1.00 [0e+00-Inf]     | 1.000    | 1.000   |
| ERLIN2   | 101         | 0         | 0.00%         | 196          | 0         | 0.00%         | 1.00 [0e+00-Inf]     | 1.000    | 1.000   |
| ERN1     | 101         | 0         | 0.00%         | 196          | 0         | 0.00%         | 1.00 [0e+00-Inf]     | 1.000    | 1.000   |
| ERN2     | 101         | 0         | 0.00%         | 196          | 0         | 0.00%         | 1.00 [0e+00-Inf]     | 1.000    | 1.000   |
| ESRP1    | 101         | 0         | 0.00%         | 196          | 0         | 0.00%         | 1.00 [0e+00-Inf]     | 1.000    | 1.000   |
| ESRRG    | 101         | 0         | 0.00%         | 196          | 0         | 0.00%         | 1.00 [0e+00-Inf]     | 1.000    | 1.000   |
| ETNK2    | 101         | 0         | 0.00%         | 196          | 0         | 0.00%         | 1.00 [0e+00-Inf]     | 1.000    | 1.000   |
| ETV3L    | 101         | 0         | 0.00%         | 196          | 0         | 0.00%         | 1.00 [0e+00-Inf]     | 1.000    | 1.000   |
| ETV3     | 101         | 0         | 0.00%         | 196          | 0         | 0.00%         | 1.00 [0e+00-Inf]     | 1.000    | 1.000   |
| EVPL     | 101         | 0         | 0.00%         | 196          | 0         | 0.00%         | 1.00 [0e+00-Inf]     | 1.000    | 1.000   |
| EVX1     | 101         | 0         | 0.00%         | 196          | 0         | 0.00%         | 1.00 [0e+00-Inf]     | 1.000    | 1.000   |
| EXO1     | 101         | 0         | 0.00%         | 196          | 0         | 0.00%         | 1.00 [0e+00-Inf]     | 1.000    | 1.000   |
| EXOC7    | 101         | 0         | 0.00%         | 196          | 0         | 0.00%         | 1.00 [0e+00-Inf]     | 1.000    | 1.000   |
| EXOC8    | 101         | 0         | 0.00%         | 196          | 0         | 0.00%         | 1.00 [0e+00-Inf]     | 1.000    | 1.000   |
| EXOSC4   | 101         | 0         | 0.00%         | 196          | 0         | 0.00%         | 1.00 [0e+00-Inf]     | 1.000    | 1.000   |
| EXT1     | 101         | 0         | 0.00%         | 196          | 0         | 0.00%         | 1.00 [0e+00-Inf]     | 1.000    | 1.000   |
| EYA1     | 101         | 0         | 0.00%         | 196          | 0         | 0.00%         | 1.00 [0e+00-Inf]     | 1.000    | 1.000   |
| EYA2     | 101         | 0         | 0.00%         | 196          | 0         | 0.00%         | 1.00 [0e+00-Inf]     | 1.000    | 1.000   |
| F11R     | 101         | 0         | 0.00%         | 196          | 0         | 0.00%         | 1.00 [0e+00-Inf]     | 1.000    | 1.000   |
| F13B     | 101         | 0         | 0.00%         | 196          | 0         | 0.00%         | 1.00 [0e+00-Inf]     | 1.000    | 1.000   |
| F5       | 101         | 0         | 0.00%         | 196          | 0         | 0.00%         | 1.00 [0e+00-Inf]     | 1.000    | 1.000   |
| FABP12   | 101         | 0         | 0.00%         | 196          | 0         | 0.00%         | 1.00 [0e+00-Inf]     | 1.000    | 1.000   |
| FABP4    | 101         | 0         | 0.00%         | 196          | 0         | 0.00%         | 1.00 [0e+00-Inf]     | 1.000    | 1.000   |



| Symbol    | CINSARC Low |           |               | CINSARC High |           |               | CINSARC High vs. Low |          |         |
|-----------|-------------|-----------|---------------|--------------|-----------|---------------|----------------------|----------|---------|
|           | N tested    | N altered | Fq alteration | N tested     | N altered | Fq alteration | OR [95%CI]           | p-value* | q-value |
| FABP5     | 101         | 0         | 0.00%         | 196          | 0         | 0.00%         | 1.00 [0e+00-Inf]     | 1.000    | 1.000   |
| FABP9     | 101         | 0         | 0.00%         | 196          | 0         | 0.00%         | 1.00 [0e+00-Inf]     | 1.000    | 1.000   |
| FADD      | 101         | 0         | 0.00%         | 196          | 0         | 0.00%         | 1.00 [0e+00-Inf]     | 1.000    | 1.000   |
| FADS6     | 101         | 0         | 0.00%         | 196          | 0         | 0.00%         | 1.00 [0e+00-Inf]     | 1.000    | 1.000   |
| FAHD1     | 101         | 0         | 0.00%         | 196          | 0         | 0.00%         | 1.00 [0e+00-Inf]     | 1.000    | 1.000   |
| UBALD1    | 101         | 0         | 0.00%         | 196          | 0         | 0.00%         | 1.00 [0e+00-Inf]     | 1.000    | 1.000   |
| UBALD2    | 101         | 0         | 0.00%         | 196          | 0         | 0.00%         | 1.00 [0e+00-Inf]     | 1.000    | 1.000   |
| FAM104A   | 101         | 0         | 0.00%         | 196          | 0         | 0.00%         | 1.00 [0e+00-Inf]     | 1.000    | 1.000   |
| FAM106A   | 101         | 1         | 0.99%         | 196          | 1         | 0.51%         | 0.51 [0.05-5.30]     | 0.638    | 1.000   |
| ABHD17C   | 101         | 0         | 0.00%         | 196          | 0         | 0.00%         | 1.00 [0e+00-Inf]     | 1.000    | 1.000   |
| FAM110B   | 101         | 0         | 0.00%         | 196          | 0         | 0.00%         | 1.00 [0e+00-Inf]     | 1.000    | 1.000   |
| FAM117A   | 101         | 0         | 0.00%         | 196          | 0         | 0.00%         | 1.00 [0e+00-Inf]     | 1.000    | 1.000   |
| FAM126A   | 101         | 0         | 0.00%         | 196          | 0         | 0.00%         | 1.00 [0e+00-Inf]     | 1.000    | 1.000   |
| FAM129A   | 101         | 0         | 0.00%         | 196          | 0         | 0.00%         | 1.00 [0e+00-Inf]     | 1.000    | 1.000   |
| FAM131A   | 101         | 0         | 0.00%         | 196          | 0         | 0.00%         | 1.00 [0e+00-Inf]     | 1.000    | 1.000   |
| FAM135B   | 101         | 0         | 0.00%         | 196          | 0         | 0.00%         | 1.00 [0e+00-Inf]     | 1.000    | 1.000   |
| FAM149B1  | 101         | 0         | 0.00%         | 196          | 0         | 0.00%         | 1.00 [0e+00-Inf]     | 1.000    | 1.000   |
| FAM163A   | 101         | 0         | 0.00%         | 196          | 0         | 0.00%         | 1.00 [0e+00-Inf]     | 1.000    | 1.000   |
| ZC2HC1A   | 101         | 0         | 0.00%         | 196          | 0         | 0.00%         | 1.00 [0e+00-Inf]     | 1.000    | 1.000   |
| FAM168A   | 101         | 0         | 0.00%         | 196          | 0         | 0.00%         | 1.00 [0e+00-Inf]     | 1.000    | 1.000   |
| FAM169B   | 101         | 0         | 0.00%         | 196          | 0         | 0.00%         | 1.00 [0e+00-Inf]     | 1.000    | 1.000   |
| FAM173A   | 101         | 0         | 0.00%         | 196          | 0         | 0.00%         | 1.00 [0e+00-Inf]     | 1.000    | 1.000   |
| FAM174B   | 101         | 0         | 0.00%         | 196          | 0         | 0.00%         | 1.00 [0e+00-Inf]     | 1.000    | 1.000   |
| FAM177A1  | 101         | 0         | 0.00%         | 196          | 0         | 0.00%         | 1.00 [0e+00-Inf]     | 1.000    | 1.000   |
| FAM177B   | 101         | 0         | 0.00%         | 196          | 0         | 0.00%         | 1.00 [0e+00-Inf]     | 1.000    | 1.000   |
| FAM181B   | 101         | 0         | 0.00%         | 196          | 0         | 0.00%         | 1.00 [0e+00-Inf]     | 1.000    | 1.000   |
| FAM189B   | 101         | 0         | 0.00%         | 196          | 0         | 0.00%         | 1.00 [0e+00-Inf]     | 1.000    | 1.000   |
| TVP23A    | 101         | 0         | 0.00%         | 196          | 0         | 0.00%         | 1.00 [0e+00-Inf]     | 1.000    | 1.000   |
| FAM197Y2  | 101         | 64        | 63.37%        | 196          | 116       | 59.18%        | 0.84 [0.55-1.27]     | 0.485    | 1.000   |
| FAM20A    | 101         | 0         | 0.00%         | 196          | 0         | 0.00%         | 1.00 [0e+00-Inf]     | 1.000    | 1.000   |
| FAM20B    | 101         | 0         | 0.00%         | 196          | 0         | 0.00%         | 1.00 [0e+00-Inf]     | 1.000    | 1.000   |
| COX20     | 101         | 0         | 0.00%         | 196          | 0         | 0.00%         | 1.00 [0e+00-Inf]     | 1.000    | 1.000   |
| FAM41AY1  | 101         | 65        | 64.36%        | 196          | 117       | 59.69%        | 0.82 [0.54-1.25]     | 0.435    | 1.000   |
| FAM43A    | 101         | 0         | 0.00%         | 196          | 0         | 0.00%         | 1.00 [0e+00-Inf]     | 1.000    | 1.000   |
| FAM47E    | 101         | 0         | 0.00%         | 196          | 0         | 0.00%         | 1.00 [0e+00-Inf]     | 1.000    | 1.000   |
| FAM49B    | 101         | 0         | 0.00%         | 196          | 0         | 0.00%         | 1.00 [0e+00-Inf]     | 1.000    | 1.000   |
| FAM57B    | 101         | 0         | 0.00%         | 196          | 0         | 0.00%         | 1.00 [0e+00-Inf]     | 1.000    | 1.000   |
| BRINP2    | 101         | 0         | 0.00%         | 196          | 0         | 0.00%         | 1.00 [0e+00-Inf]     | 1.000    | 1.000   |
| BRINP3    | 101         | 0         | 0.00%         | 196          | 0         | 0.00%         | 1.00 [0e+00-Inf]     | 1.000    | 1.000   |
| FAM66D    | 101         | 1         | 0.99%         | 196          | 1         | 0.51%         | 0.51 [0.05-5.30]     | 0.638    | 1.000   |
| FAM71A    | 101         | 0         | 0.00%         | 196          | 0         | 0.00%         | 1.00 [0e+00-Inf]     | 1.000    | 1.000   |
| FAM71E2   | 101         | 0         | 0.00%         | 196          | 0         | 0.00%         | 1.00 [0e+00-Inf]     | 1.000    | 1.000   |
| FAM72A    | 101         | 0         | 0.00%         | 196          | 0         | 0.00%         | 1.00 [0e+00-Inf]     | 1.000    | 1.000   |
| SPATA31A6 | 101         | 0         | 0.00%         | 196          | 0         | 0.00%         | 1.00 [0e+00-Inf]     | 1.000    | 1.000   |
| FAM78B    | 101         | 0         | 0.00%         | 196          | 0         | 0.00%         | 1.00 [0e+00-Inf]     | 1.000    | 1.000   |
| RMDN1     | 101         | 0         | 0.00%         | 196          | 0         | 0.00%         | 1.00 [0e+00-Inf]     | 1.000    | 1.000   |
| FAM83A    | 101         | 0         | 0.00%         | 196          | 0         | 0.00%         | 1.00 [0e+00-Inf]     | 1.000    | 1.000   |
| FAM83C    | 101         | 0         | 0.00%         | 196          | 0         | 0.00%         | 1.00 [0e+00-Inf]     | 1.000    | 1.000   |
| FAM83D    | 101         | 0         | 0.00%         | 196          | 0         | 0.00%         | 1.00 [0e+00-Inf]     | 1.000    | 1.000   |
| FAM83H    | 101         | 0         | 0.00%         | 196          | 0         | 0.00%         | 1.00 [0e+00-Inf]     | 1.000    | 1.000   |
| FAM86C1   | 101         | 0         | 0.00%         | 196          | 0         | 0.00%         | 1.00 [0e+00-Inf]     | 1.000    | 1.000   |
| FAM89A    | 101         | 0         | 0.00%         | 196          | 0         | 0.00%         | 1.00 [0e+00-Inf]     | 1.000    | 1.000   |
| FAM91A1   | 101         | 0         | 0.00%         | 196          | 0         | 0.00%         | 1.00 [0e+00-Inf]     | 1.000    | 1.000   |
| FANCF     | 101         | 0         | 0.00%         | 196          | 0         | 0.00%         | 1.00 [0e+00-Inf]     | 1.000    | 1.000   |
| FANCI     | 101         | 0         | 0.00%         | 196          | 0         | 0.00%         | 1.00 [0e+00-Inf]     | 1.000    | 1.000   |
| FASLG     | 101         | 0         | 0.00%         | 196          | 0         | 0.00%         | 1.00 [0e+00-Inf]     | 1.000    | 1.000   |
| FASN      | 101         | 0         | 0.00%         | 196          | 0         | 0.00%         | 1.00 [0e+00-Inf]     | 1.000    | 1.000   |
| FBF1      | 101         | 0         | 0.00%         | 196          | 0         | 0.00%         | 1.00 [0e+00-Inf]     | 1.000    | 1.000   |
| FBRS      | 101         | 0         | 0.00%         | 196          | 0         | 0.00%         | 1.00 [0e+00-Inf]     | 1.000    | 1.000   |
| FBXL16    | 101         | 0         | 0.00%         | 196          | 0         | 0.00%         | 1.00 [0e+00-Inf]     | 1.000    | 1.000   |
| FBXL19    | 101         | 0         | 0.00%         | 196          | 0         | 0.00%         | 1.00 [0e+00-Inf]     | 1.000    | 1.000   |
| FBXL20    | 101         | 0         | 0.00%         | 196          | 0         | 0.00%         | 1.00 [0e+00-Inf]     | 1.000    | 1.000   |
| FBXL6     | 101         | 0         | 0.00%         | 196          | 0         | 0.00%         | 1.00 [0e+00-Inf]     | 1.000    | 1.000   |
| FBXO28    | 101         | 0         | 0.00%         | 196          | 0         | 0.00%         | 1.00 [0e+00-Inf]     | 1.000    | 1.000   |
| FBXO32    | 101         | 0         | 0.00%         | 196          | 0         | 0.00%         | 1.00 [0e+00-Inf]     | 1.000    | 1.000   |
| FBXO3     | 101         | 0         | 0.00%         | 196          | 0         | 0.00%         | 1.00 [0e+00-Inf]     | 1.000    | 1.000   |
| FBXO43    | 101         | 0         | 0.00%         | 196          | 0         | 0.00%         | 1.00 [0e+00-Inf]     | 1.000    | 1.000   |
| FBXO45    | 101         | 0         | 0.00%         | 196          | 0         | 0.00%         | 1.00 [0e+00-Inf]     | 1.000    | 1.000   |
| FBXO47    | 101         | 0         | 0.00%         | 196          | 0         | 0.00%         | 1.00 [0e+00-Inf]     | 1.000    | 1.000   |
| FCAMR     | 101         | 0         | 0.00%         | 196          | 0         | 0.00%         | 1.00 [0e+00-Inf]     | 1.000    | 1.000   |
| FCER1A    | 101         | 0         | 0.00%         | 196          | 0         | 0.00%         | 1.00 [0e+00-Inf]     | 1.000    | 1.000   |



| Symbol           | CINSARC Low |           |               | CINSARC High |           |               | CINSARC High vs. Low |          |         |
|------------------|-------------|-----------|---------------|--------------|-----------|---------------|----------------------|----------|---------|
|                  | N tested    | N altered | Fq alteration | N tested     | N altered | Fq alteration | OR [95%CI]           | p-value* | q-value |
| <i>FTSJ3</i>     | 101         | 0         | 0.00%         | 196          | 0         | 0.00%         | 1.00 [0e+00-Inf]     | 1.000    | 1.000   |
| <i>FURIN</i>     | 101         | 0         | 0.00%         | 196          | 0         | 0.00%         | 1.00 [0e+00-Inf]     | 1.000    | 1.000   |
| <i>FUS</i>       | 101         | 0         | 0.00%         | 196          | 0         | 0.00%         | 1.00 [0e+00-Inf]     | 1.000    | 1.000   |
| <i>FUT10</i>     | 101         | 0         | 0.00%         | 196          | 0         | 0.00%         | 1.00 [0e+00-Inf]     | 1.000    | 1.000   |
| <i>FUT11</i>     | 101         | 0         | 0.00%         | 196          | 0         | 0.00%         | 1.00 [0e+00-Inf]     | 1.000    | 1.000   |
| <i>FUT3</i>      | 101         | 0         | 0.00%         | 196          | 0         | 0.00%         | 1.00 [0e+00-Inf]     | 1.000    | 1.000   |
| <i>FXR1</i>      | 101         | 0         | 0.00%         | 196          | 0         | 0.00%         | 1.00 [0e+00-Inf]     | 1.000    | 1.000   |
| <i>FYTTD1</i>    | 101         | 0         | 0.00%         | 196          | 0         | 0.00%         | 1.00 [0e+00-Inf]     | 1.000    | 1.000   |
| <i>FZD4</i>      | 101         | 0         | 0.00%         | 196          | 0         | 0.00%         | 1.00 [0e+00-Inf]     | 1.000    | 1.000   |
| <i>FZD6</i>      | 101         | 0         | 0.00%         | 196          | 0         | 0.00%         | 1.00 [0e+00-Inf]     | 1.000    | 1.000   |
| <i>GOS2</i>      | 101         | 0         | 0.00%         | 196          | 0         | 0.00%         | 1.00 [0e+00-Inf]     | 1.000    | 1.000   |
| <i>G2E3</i>      | 101         | 0         | 0.00%         | 196          | 0         | 0.00%         | 1.00 [0e+00-Inf]     | 1.000    | 1.000   |
| <i>G3BP2</i>     | 101         | 0         | 0.00%         | 196          | 0         | 0.00%         | 1.00 [0e+00-Inf]     | 1.000    | 1.000   |
| <i>GAA</i>       | 101         | 0         | 0.00%         | 196          | 0         | 0.00%         | 1.00 [0e+00-Inf]     | 1.000    | 1.000   |
| <i>GAB2</i>      | 101         | 0         | 0.00%         | 196          | 0         | 0.00%         | 1.00 [0e+00-Inf]     | 1.000    | 1.000   |
| <i>GABARAPL3</i> | 101         | 0         | 0.00%         | 196          | 0         | 0.00%         | 1.00 [0e+00-Inf]     | 1.000    | 1.000   |
| <i>GABPB2</i>    | 101         | 0         | 0.00%         | 196          | 0         | 0.00%         | 1.00 [0e+00-Inf]     | 1.000    | 1.000   |
| <i>GAL3ST3</i>   | 101         | 0         | 0.00%         | 196          | 0         | 0.00%         | 1.00 [0e+00-Inf]     | 1.000    | 1.000   |
| <i>GALK1</i>     | 101         | 0         | 0.00%         | 196          | 0         | 0.00%         | 1.00 [0e+00-Inf]     | 1.000    | 1.000   |
| <i>GALNT2</i>    | 101         | 0         | 0.00%         | 196          | 0         | 0.00%         | 1.00 [0e+00-Inf]     | 1.000    | 1.000   |
| <i>GALR2</i>     | 101         | 0         | 0.00%         | 196          | 0         | 0.00%         | 1.00 [0e+00-Inf]     | 1.000    | 1.000   |
| <i>GALT</i>      | 101         | 0         | 0.00%         | 196          | 0         | 0.00%         | 1.00 [0e+00-Inf]     | 1.000    | 1.000   |
| <i>GAL</i>       | 101         | 0         | 0.00%         | 196          | 0         | 0.00%         | 1.00 [0e+00-Inf]     | 1.000    | 1.000   |
| <i>GARS</i>      | 101         | 0         | 0.00%         | 196          | 0         | 0.00%         | 1.00 [0e+00-Inf]     | 1.000    | 1.000   |
| <i>GAS2L2</i>    | 101         | 0         | 0.00%         | 196          | 0         | 0.00%         | 1.00 [0e+00-Inf]     | 1.000    | 1.000   |
| <i>GAS2</i>      | 101         | 0         | 0.00%         | 196          | 0         | 0.00%         | 1.00 [0e+00-Inf]     | 1.000    | 1.000   |
| <i>GAS5</i>      | 101         | 0         | 0.00%         | 196          | 0         | 0.00%         | 1.00 [0e+00-Inf]     | 1.000    | 1.000   |
| <i>GATA5</i>     | 101         | 0         | 0.00%         | 196          | 0         | 0.00%         | 1.00 [0e+00-Inf]     | 1.000    | 1.000   |
| <i>GATAD2B</i>   | 101         | 0         | 0.00%         | 196          | 0         | 0.00%         | 1.00 [0e+00-Inf]     | 1.000    | 1.000   |
| <i>GBAP1</i>     | 101         | 0         | 0.00%         | 196          | 0         | 0.00%         | 1.00 [0e+00-Inf]     | 1.000    | 1.000   |
| <i>GBA</i>       | 101         | 0         | 0.00%         | 196          | 0         | 0.00%         | 1.00 [0e+00-Inf]     | 1.000    | 1.000   |
| <i>GCGR</i>      | 101         | 0         | 0.00%         | 196          | 0         | 0.00%         | 1.00 [0e+00-Inf]     | 1.000    | 1.000   |
| <i>GCK</i>       | 101         | 0         | 0.00%         | 196          | 0         | 0.00%         | 1.00 [0e+00-Inf]     | 1.000    | 1.000   |
| <i>GCNT7</i>     | 101         | 0         | 0.00%         | 196          | 0         | 0.00%         | 1.00 [0e+00-Inf]     | 1.000    | 1.000   |
| <i>GDAP1L1</i>   | 101         | 0         | 0.00%         | 196          | 0         | 0.00%         | 1.00 [0e+00-Inf]     | 1.000    | 1.000   |
| <i>GDAP1</i>     | 101         | 0         | 0.00%         | 196          | 0         | 0.00%         | 1.00 [0e+00-Inf]     | 1.000    | 1.000   |
| <i>GDE1</i>      | 101         | 0         | 0.00%         | 196          | 0         | 0.00%         | 1.00 [0e+00-Inf]     | 1.000    | 1.000   |
| <i>GDF5</i>      | 101         | 0         | 0.00%         | 196          | 0         | 0.00%         | 1.00 [0e+00-Inf]     | 1.000    | 1.000   |
| <i>GDF6</i>      | 101         | 0         | 0.00%         | 196          | 0         | 0.00%         | 1.00 [0e+00-Inf]     | 1.000    | 1.000   |
| <i>GDPD1</i>     | 101         | 0         | 0.00%         | 196          | 0         | 0.00%         | 1.00 [0e+00-Inf]     | 1.000    | 1.000   |
| <i>GDPD3</i>     | 101         | 0         | 0.00%         | 196          | 0         | 0.00%         | 1.00 [0e+00-Inf]     | 1.000    | 1.000   |
| <i>GDPD4</i>     | 101         | 0         | 0.00%         | 196          | 0         | 0.00%         | 1.00 [0e+00-Inf]     | 1.000    | 1.000   |
| <i>GDPD5</i>     | 101         | 0         | 0.00%         | 196          | 0         | 0.00%         | 1.00 [0e+00-Inf]     | 1.000    | 1.000   |
| <i>GEM</i>       | 101         | 0         | 0.00%         | 196          | 0         | 0.00%         | 1.00 [0e+00-Inf]     | 1.000    | 1.000   |
| <i>GFER</i>      | 101         | 0         | 0.00%         | 196          | 0         | 0.00%         | 1.00 [0e+00-Inf]     | 1.000    | 1.000   |
| <i>GGA2</i>      | 101         | 0         | 0.00%         | 196          | 0         | 0.00%         | 1.00 [0e+00-Inf]     | 1.000    | 1.000   |
| <i>GGA3</i>      | 101         | 0         | 0.00%         | 196          | 0         | 0.00%         | 1.00 [0e+00-Inf]     | 1.000    | 1.000   |
| <i>GGCT</i>      | 101         | 0         | 0.00%         | 196          | 0         | 0.00%         | 1.00 [0e+00-Inf]     | 1.000    | 1.000   |
| <i>GGH</i>       | 101         | 0         | 0.00%         | 196          | 0         | 0.00%         | 1.00 [0e+00-Inf]     | 1.000    | 1.000   |
| <i>GGNBP2</i>    | 101         | 0         | 0.00%         | 196          | 0         | 0.00%         | 1.00 [0e+00-Inf]     | 1.000    | 1.000   |
| <i>GGPS1</i>     | 101         | 0         | 0.00%         | 196          | 0         | 0.00%         | 1.00 [0e+00-Inf]     | 1.000    | 1.000   |
| <i>GGT7</i>      | 101         | 0         | 0.00%         | 196          | 0         | 0.00%         | 1.00 [0e+00-Inf]     | 1.000    | 1.000   |
| <i>GH1</i>       | 101         | 0         | 0.00%         | 196          | 0         | 0.00%         | 1.00 [0e+00-Inf]     | 1.000    | 1.000   |
| <i>GH2</i>       | 101         | 0         | 0.00%         | 196          | 0         | 0.00%         | 1.00 [0e+00-Inf]     | 1.000    | 1.000   |
| <i>GHRHR</i>     | 101         | 0         | 0.00%         | 196          | 0         | 0.00%         | 1.00 [0e+00-Inf]     | 1.000    | 1.000   |
| <i>GHRH</i>      | 101         | 0         | 0.00%         | 196          | 0         | 0.00%         | 1.00 [0e+00-Inf]     | 1.000    | 1.000   |
| <i>GINS4</i>     | 101         | 0         | 0.00%         | 196          | 0         | 0.00%         | 1.00 [0e+00-Inf]     | 1.000    | 1.000   |
| <i>GIP</i>       | 101         | 0         | 0.00%         | 196          | 0         | 0.00%         | 1.00 [0e+00-Inf]     | 1.000    | 1.000   |
| <i>GIT1</i>      | 101         | 0         | 0.00%         | 196          | 0         | 0.00%         | 1.00 [0e+00-Inf]     | 1.000    | 1.000   |
| <i>SLX1B</i>     | 101         | 0         | 0.00%         | 196          | 0         | 0.00%         | 1.00 [0e+00-Inf]     | 1.000    | 1.000   |
| <i>GJA5</i>      | 101         | 0         | 0.00%         | 196          | 0         | 0.00%         | 1.00 [0e+00-Inf]     | 1.000    | 1.000   |
| <i>GJA8</i>      | 101         | 0         | 0.00%         | 196          | 0         | 0.00%         | 1.00 [0e+00-Inf]     | 1.000    | 1.000   |
| <i>GJC2</i>      | 101         | 0         | 0.00%         | 196          | 0         | 0.00%         | 1.00 [0e+00-Inf]     | 1.000    | 1.000   |
| <i>GJD3</i>      | 101         | 0         | 0.00%         | 196          | 0         | 0.00%         | 1.00 [0e+00-Inf]     | 1.000    | 1.000   |
| <i>GLI4</i>      | 101         | 0         | 0.00%         | 196          | 0         | 0.00%         | 1.00 [0e+00-Inf]     | 1.000    | 1.000   |
| <i>GLIPR1L1</i>  | 101         | 0         | 0.00%         | 196          | 0         | 0.00%         | 1.00 [0e+00-Inf]     | 1.000    | 1.000   |
| <i>GLIPR1L2</i>  | 101         | 0         | 0.00%         | 196          | 0         | 0.00%         | 1.00 [0e+00-Inf]     | 1.000    | 1.000   |
| <i>GLIPR1</i>    | 101         | 0         | 0.00%         | 196          | 0         | 0.00%         | 1.00 [0e+00-Inf]     | 1.000    | 1.000   |
| <i>GLIS2</i>     | 101         | 0         | 0.00%         | 196          | 0         | 0.00%         | 1.00 [0e+00-Inf]     | 1.000    | 1.000   |
| <i>GLRX2</i>     | 101         | 0         | 0.00%         | 196          | 0         | 0.00%         | 1.00 [0e+00-Inf]     | 1.000    | 1.000   |
| <i>COLGALT2</i>  | 101         | 0         | 0.00%         | 196          | 0         | 0.00%         | 1.00 [0e+00-Inf]     | 1.000    | 1.000   |

| Symbol    | CINSARC Low |           |               | CINSARC High |           |               | CINSARC High vs. Low |          |         |
|-----------|-------------|-----------|---------------|--------------|-----------|---------------|----------------------|----------|---------|
|           | N tested    | N altered | Fq alteration | N tested     | N altered | Fq alteration | OR [95%CI]           | p-value* | q-value |
| GLUL      | 101         | 0         | 0.00%         | 196          | 0         | 0.00%         | 1.00 [0e+00-Inf]     | 1.000    | 1.000   |
| GLYR1     | 101         | 0         | 0.00%         | 196          | 0         | 0.00%         | 1.00 [0e+00-Inf]     | 1.000    | 1.000   |
| GMEB2     | 101         | 0         | 0.00%         | 196          | 0         | 0.00%         | 1.00 [0e+00-Inf]     | 1.000    | 1.000   |
| GML       | 101         | 0         | 0.00%         | 196          | 0         | 0.00%         | 1.00 [0e+00-Inf]     | 1.000    | 1.000   |
| GNA13     | 101         | 0         | 0.00%         | 196          | 0         | 0.00%         | 1.00 [0e+00-Inf]     | 1.000    | 1.000   |
| GNAS-AS1  | 101         | 0         | 0.00%         | 196          | 0         | 0.00%         | 1.00 [0e+00-Inf]     | 1.000    | 1.000   |
| GNAS      | 101         | 0         | 0.00%         | 196          | 0         | 0.00%         | 1.00 [0e+00-Inf]     | 1.000    | 1.000   |
| GNB4      | 101         | 0         | 0.00%         | 196          | 0         | 0.00%         | 1.00 [0e+00-Inf]     | 1.000    | 1.000   |
| GNG13     | 101         | 0         | 0.00%         | 196          | 0         | 0.00%         | 1.00 [0e+00-Inf]     | 1.000    | 1.000   |
| GNG4      | 101         | 0         | 0.00%         | 196          | 0         | 0.00%         | 1.00 [0e+00-Inf]     | 1.000    | 1.000   |
| GNGT2     | 101         | 0         | 0.00%         | 196          | 0         | 0.00%         | 1.00 [0e+00-Inf]     | 1.000    | 1.000   |
| GNPAT     | 101         | 0         | 0.00%         | 196          | 0         | 0.00%         | 1.00 [0e+00-Inf]     | 1.000    | 1.000   |
| GNPTG     | 101         | 0         | 0.00%         | 196          | 0         | 0.00%         | 1.00 [0e+00-Inf]     | 1.000    | 1.000   |
| GNRHR2    | 101         | 0         | 0.00%         | 196          | 0         | 0.00%         | 1.00 [0e+00-Inf]     | 1.000    | 1.000   |
| GNS       | 101         | 0         | 0.00%         | 196          | 0         | 0.00%         | 1.00 [0e+00-Inf]     | 1.000    | 1.000   |
| GOLGA2P3Y | 101         | 64        | 63.37%        | 196          | 116       | 59.18%        | 0.84 [0.55-1.27]     | 0.485    | 1.000   |
| GOLGA6L5P | 101         | 0         | 0.00%         | 196          | 0         | 0.00%         | 1.00 [0e+00-Inf]     | 1.000    | 1.000   |
| GOLGA6L6  | 101         | 0         | 0.00%         | 196          | 0         | 0.00%         | 1.00 [0e+00-Inf]     | 1.000    | 1.000   |
| GOLGA7    | 101         | 0         | 0.00%         | 196          | 0         | 0.00%         | 1.00 [0e+00-Inf]     | 1.000    | 1.000   |
| GOLGA8CP  | 101         | 0         | 0.00%         | 196          | 0         | 0.00%         | 1.00 [0e+00-Inf]     | 1.000    | 1.000   |
| GOLPH3L   | 101         | 0         | 0.00%         | 196          | 0         | 0.00%         | 1.00 [0e+00-Inf]     | 1.000    | 1.000   |
| GOLT1A    | 101         | 0         | 0.00%         | 196          | 0         | 0.00%         | 1.00 [0e+00-Inf]     | 1.000    | 1.000   |
| GON4L     | 101         | 0         | 0.00%         | 196          | 0         | 0.00%         | 1.00 [0e+00-Inf]     | 1.000    | 1.000   |
| GORAB     | 101         | 0         | 0.00%         | 196          | 0         | 0.00%         | 1.00 [0e+00-Inf]     | 1.000    | 1.000   |
| GOSR1     | 101         | 0         | 0.00%         | 196          | 0         | 0.00%         | 1.00 [0e+00-Inf]     | 1.000    | 1.000   |
| GOSR2     | 101         | 0         | 0.00%         | 196          | 0         | 0.00%         | 1.00 [0e+00-Inf]     | 1.000    | 1.000   |
| GOT1L1    | 101         | 0         | 0.00%         | 196          | 0         | 0.00%         | 1.00 [0e+00-Inf]     | 1.000    | 1.000   |
| GP2       | 101         | 0         | 0.00%         | 196          | 0         | 0.00%         | 1.00 [0e+00-Inf]     | 1.000    | 1.000   |
| GP5       | 101         | 0         | 0.00%         | 196          | 0         | 0.00%         | 1.00 [0e+00-Inf]     | 1.000    | 1.000   |
| GPA33     | 101         | 0         | 0.00%         | 196          | 0         | 0.00%         | 1.00 [0e+00-Inf]     | 1.000    | 1.000   |
| GPAA1     | 101         | 0         | 0.00%         | 196          | 0         | 0.00%         | 1.00 [0e+00-Inf]     | 1.000    | 1.000   |
| GPATCH2   | 101         | 0         | 0.00%         | 196          | 0         | 0.00%         | 1.00 [0e+00-Inf]     | 1.000    | 1.000   |
| GPATCH4   | 101         | 0         | 0.00%         | 196          | 0         | 0.00%         | 1.00 [0e+00-Inf]     | 1.000    | 1.000   |
| GPIHBP1   | 101         | 0         | 0.00%         | 196          | 0         | 0.00%         | 1.00 [0e+00-Inf]     | 1.000    | 1.000   |
| GNPMB     | 101         | 0         | 0.00%         | 196          | 0         | 0.00%         | 1.00 [0e+00-Inf]     | 1.000    | 1.000   |
| GPR137B   | 101         | 0         | 0.00%         | 196          | 0         | 0.00%         | 1.00 [0e+00-Inf]     | 1.000    | 1.000   |
| GPR139    | 101         | 0         | 0.00%         | 196          | 0         | 0.00%         | 1.00 [0e+00-Inf]     | 1.000    | 1.000   |
| GPR142    | 101         | 0         | 0.00%         | 196          | 0         | 0.00%         | 1.00 [0e+00-Inf]     | 1.000    | 1.000   |
| GPR152    | 101         | 0         | 0.00%         | 196          | 0         | 0.00%         | 1.00 [0e+00-Inf]     | 1.000    | 1.000   |
| GPR161    | 101         | 0         | 0.00%         | 196          | 0         | 0.00%         | 1.00 [0e+00-Inf]     | 1.000    | 1.000   |
| GPR171    | 101         | 0         | 0.00%         | 196          | 0         | 0.00%         | 1.00 [0e+00-Inf]     | 1.000    | 1.000   |
| SLC52A2   | 101         | 0         | 0.00%         | 196          | 0         | 0.00%         | 1.00 [0e+00-Inf]     | 1.000    | 1.000   |
| GPR179    | 101         | 0         | 0.00%         | 196          | 0         | 0.00%         | 1.00 [0e+00-Inf]     | 1.000    | 1.000   |
| GPR20     | 101         | 0         | 0.00%         | 196          | 0         | 0.00%         | 1.00 [0e+00-Inf]     | 1.000    | 1.000   |
| GPR25     | 101         | 0         | 0.00%         | 196          | 0         | 0.00%         | 1.00 [0e+00-Inf]     | 1.000    | 1.000   |
| GPR37L1   | 101         | 0         | 0.00%         | 196          | 0         | 0.00%         | 1.00 [0e+00-Inf]     | 1.000    | 1.000   |
| GPR52     | 101         | 0         | 0.00%         | 196          | 0         | 0.00%         | 1.00 [0e+00-Inf]     | 1.000    | 1.000   |
| GPR87     | 101         | 0         | 0.00%         | 196          | 0         | 0.00%         | 1.00 [0e+00-Inf]     | 1.000    | 1.000   |
| GPR89A    | 101         | 0         | 0.00%         | 196          | 0         | 0.00%         | 1.00 [0e+00-Inf]     | 1.000    | 1.000   |
| GPR89B    | 101         | 0         | 0.00%         | 196          | 0         | 0.00%         | 1.00 [0e+00-Inf]     | 1.000    | 1.000   |
| GPRC5B    | 101         | 0         | 0.00%         | 196          | 0         | 0.00%         | 1.00 [0e+00-Inf]     | 1.000    | 1.000   |
| GPRC5C    | 101         | 0         | 0.00%         | 196          | 0         | 0.00%         | 1.00 [0e+00-Inf]     | 1.000    | 1.000   |
| GPS1      | 101         | 0         | 0.00%         | 196          | 0         | 0.00%         | 1.00 [0e+00-Inf]     | 1.000    | 1.000   |
| GPT2      | 101         | 0         | 0.00%         | 196          | 0         | 0.00%         | 1.00 [0e+00-Inf]     | 1.000    | 1.000   |
| GPT       | 101         | 0         | 0.00%         | 196          | 0         | 0.00%         | 1.00 [0e+00-Inf]     | 1.000    | 1.000   |
| GRAPL     | 101         | 0         | 0.00%         | 196          | 1         | 0.51%         | 3.2e+07 [0e+00-Inf]  | 0.997    | 1.000   |
| GRB2      | 101         | 0         | 0.00%         | 196          | 0         | 0.00%         | 1.00 [0e+00-Inf]     | 1.000    | 1.000   |
| GRB7      | 101         | 0         | 0.00%         | 196          | 0         | 0.00%         | 1.00 [0e+00-Inf]     | 1.000    | 1.000   |
| GREM2     | 101         | 0         | 0.00%         | 196          | 0         | 0.00%         | 1.00 [0e+00-Inf]     | 1.000    | 1.000   |
| GRHL2     | 101         | 0         | 0.00%         | 196          | 0         | 0.00%         | 1.00 [0e+00-Inf]     | 1.000    | 1.000   |
| GRIN2A    | 101         | 0         | 0.00%         | 196          | 0         | 0.00%         | 1.00 [0e+00-Inf]     | 1.000    | 1.000   |
| GRIN2C    | 101         | 0         | 0.00%         | 196          | 0         | 0.00%         | 1.00 [0e+00-Inf]     | 1.000    | 1.000   |
| GRINA     | 101         | 0         | 0.00%         | 196          | 0         | 0.00%         | 1.00 [0e+00-Inf]     | 1.000    | 1.000   |
| GRIP1     | 101         | 0         | 0.00%         | 196          | 0         | 0.00%         | 1.00 [0e+00-Inf]     | 1.000    | 1.000   |
| GRM5      | 101         | 0         | 0.00%         | 196          | 0         | 0.00%         | 1.00 [0e+00-Inf]     | 1.000    | 1.000   |
| GRP       | 101         | 0         | 0.00%         | 196          | 0         | 0.00%         | 1.00 [0e+00-Inf]     | 1.000    | 1.000   |
| GSDMA     | 101         | 0         | 0.00%         | 196          | 0         | 0.00%         | 1.00 [0e+00-Inf]     | 1.000    | 1.000   |
| GSDMB     | 101         | 0         | 0.00%         | 196          | 0         | 0.00%         | 1.00 [0e+00-Inf]     | 1.000    | 1.000   |
| GSDMC     | 101         | 1         | 0.99%         | 196          | 0         | 0.00%         | 1.6e-08 [0e+00-Inf]  | 0.996    | 1.000   |
| GSDMD     | 101         | 0         | 0.00%         | 196          | 0         | 0.00%         | 1.00 [0e+00-Inf]     | 1.000    | 1.000   |
| GSG1L     | 101         | 0         | 0.00%         | 196          | 0         | 0.00%         | 1.00 [0e+00-Inf]     | 1.000    | 1.000   |

| Symbol     | CINSARC Low |           |               | CINSARC High |           |               | CINSARC High vs. Low |          |         |
|------------|-------------|-----------|---------------|--------------|-----------|---------------|----------------------|----------|---------|
|            | N tested    | N altered | Fq alteration | N tested     | N altered | Fq alteration | OR [95%CI]           | p-value* | q-value |
| GSPT1      | 101         | 0         | 0.00%         | 196          | 0         | 0.00%         | 1.00 [0e+00-Inf]     | 1.000    | 1.000   |
| GSR        | 101         | 0         | 0.00%         | 196          | 0         | 0.00%         | 1.00 [0e+00-Inf]     | 1.000    | 1.000   |
| GSS        | 101         | 0         | 0.00%         | 196          | 0         | 0.00%         | 1.00 [0e+00-Inf]     | 1.000    | 1.000   |
| GSTM1      | 101         | 1         | 0.99%         | 196          | 0         | 0.00%         | 1.6e-08 [0e+00-Inf]  | 0.996    | 1.000   |
| GSTM2      | 101         | 0         | 0.00%         | 196          | 0         | 0.00%         | 1.00 [0e+00-Inf]     | 1.000    | 1.000   |
| GSTP1      | 101         | 0         | 0.00%         | 196          | 0         | 0.00%         | 1.00 [0e+00-Inf]     | 1.000    | 1.000   |
| GSTT1      | 101         | 4         | 3.96%         | 196          | 4         | 2.04%         | 0.51 [0.16-1.65]     | 0.342    | 1.000   |
| GTF2E2     | 101         | 0         | 0.00%         | 196          | 0         | 0.00%         | 1.00 [0e+00-Inf]     | 1.000    | 1.000   |
| GTF2H2     | 101         | 0         | 0.00%         | 196          | 0         | 0.00%         | 1.00 [0e+00-Inf]     | 1.000    | 1.000   |
| GTF3C1     | 101         | 0         | 0.00%         | 196          | 0         | 0.00%         | 1.00 [0e+00-Inf]     | 1.000    | 1.000   |
| MTG2       | 101         | 0         | 0.00%         | 196          | 0         | 0.00%         | 1.00 [0e+00-Inf]     | 1.000    | 1.000   |
| GTSF1L     | 101         | 0         | 0.00%         | 196          | 0         | 0.00%         | 1.00 [0e+00-Inf]     | 1.000    | 1.000   |
| GUCY2EP    | 101         | 0         | 0.00%         | 196          | 0         | 0.00%         | 1.00 [0e+00-Inf]     | 1.000    | 1.000   |
| GUK1       | 101         | 0         | 0.00%         | 196          | 0         | 0.00%         | 1.00 [0e+00-Inf]     | 1.000    | 1.000   |
| H3F3A      | 101         | 0         | 0.00%         | 196          | 0         | 0.00%         | 1.00 [0e+00-Inf]     | 1.000    | 1.000   |
| H3F3B      | 101         | 0         | 0.00%         | 196          | 0         | 0.00%         | 1.00 [0e+00-Inf]     | 1.000    | 1.000   |
| HACE1      | 101         | 0         | 0.00%         | 196          | 0         | 0.00%         | 1.00 [0e+00-Inf]     | 1.000    | 1.000   |
| HAGHL      | 101         | 0         | 0.00%         | 196          | 0         | 0.00%         | 1.00 [0e+00-Inf]     | 1.000    | 1.000   |
| HAGH       | 101         | 0         | 0.00%         | 196          | 0         | 0.00%         | 1.00 [0e+00-Inf]     | 1.000    | 1.000   |
| HAPLN2     | 101         | 0         | 0.00%         | 196          | 0         | 0.00%         | 1.00 [0e+00-Inf]     | 1.000    | 1.000   |
| HAPLN3     | 101         | 0         | 0.00%         | 196          | 0         | 0.00%         | 1.00 [0e+00-Inf]     | 1.000    | 1.000   |
| HAR1A      | 101         | 0         | 0.00%         | 196          | 0         | 0.00%         | 1.00 [0e+00-Inf]     | 1.000    | 1.000   |
| HAR1B      | 101         | 0         | 0.00%         | 196          | 0         | 0.00%         | 1.00 [0e+00-Inf]     | 1.000    | 1.000   |
| HAS1       | 101         | 0         | 0.00%         | 196          | 0         | 0.00%         | 1.00 [0e+00-Inf]     | 1.000    | 1.000   |
| HAS2-AS1   | 101         | 0         | 0.00%         | 196          | 0         | 0.00%         | 1.00 [0e+00-Inf]     | 1.000    | 1.000   |
| HAS2       | 101         | 0         | 0.00%         | 196          | 0         | 0.00%         | 1.00 [0e+00-Inf]     | 1.000    | 1.000   |
| HAX1       | 101         | 0         | 0.00%         | 196          | 0         | 0.00%         | 1.00 [0e+00-Inf]     | 1.000    | 1.000   |
| HBA1       | 101         | 0         | 0.00%         | 196          | 0         | 0.00%         | 1.00 [0e+00-Inf]     | 1.000    | 1.000   |
| HBA2       | 101         | 0         | 0.00%         | 196          | 0         | 0.00%         | 1.00 [0e+00-Inf]     | 1.000    | 1.000   |
| HBM        | 101         | 0         | 0.00%         | 196          | 0         | 0.00%         | 1.00 [0e+00-Inf]     | 1.000    | 1.000   |
| HBQ1       | 101         | 0         | 0.00%         | 196          | 0         | 0.00%         | 1.00 [0e+00-Inf]     | 1.000    | 1.000   |
| HBZ        | 101         | 0         | 0.00%         | 196          | 0         | 0.00%         | 1.00 [0e+00-Inf]     | 1.000    | 1.000   |
| HCFC1R1    | 101         | 0         | 0.00%         | 196          | 0         | 0.00%         | 1.00 [0e+00-Inf]     | 1.000    | 1.000   |
| HCN3       | 101         | 0         | 0.00%         | 196          | 0         | 0.00%         | 1.00 [0e+00-Inf]     | 1.000    | 1.000   |
| HDDC3      | 101         | 0         | 0.00%         | 196          | 0         | 0.00%         | 1.00 [0e+00-Inf]     | 1.000    | 1.000   |
| HDGF       | 101         | 0         | 0.00%         | 196          | 0         | 0.00%         | 1.00 [0e+00-Inf]     | 1.000    | 1.000   |
| HEATR1     | 101         | 0         | 0.00%         | 196          | 0         | 0.00%         | 1.00 [0e+00-Inf]     | 1.000    | 1.000   |
| HEATR4     | 101         | 0         | 0.00%         | 196          | 0         | 0.00%         | 1.00 [0e+00-Inf]     | 1.000    | 1.000   |
| HEATR5A    | 101         | 0         | 0.00%         | 196          | 0         | 0.00%         | 1.00 [0e+00-Inf]     | 1.000    | 1.000   |
| HEATR6     | 101         | 0         | 0.00%         | 196          | 0         | 0.00%         | 1.00 [0e+00-Inf]     | 1.000    | 1.000   |
| MROH1      | 101         | 0         | 0.00%         | 196          | 0         | 0.00%         | 1.00 [0e+00-Inf]     | 1.000    | 1.000   |
| HECTD1     | 101         | 0         | 0.00%         | 196          | 0         | 0.00%         | 1.00 [0e+00-Inf]     | 1.000    | 1.000   |
| HELB       | 101         | 0         | 0.00%         | 196          | 0         | 0.00%         | 1.00 [0e+00-Inf]     | 1.000    | 1.000   |
| HELZ       | 101         | 0         | 0.00%         | 196          | 0         | 0.00%         | 1.00 [0e+00-Inf]     | 1.000    | 1.000   |
| HERC2P4    | 101         | 0         | 0.00%         | 196          | 0         | 0.00%         | 1.00 [0e+00-Inf]     | 1.000    | 1.000   |
| HES1       | 101         | 0         | 0.00%         | 196          | 0         | 0.00%         | 1.00 [0e+00-Inf]     | 1.000    | 1.000   |
| HEXA       | 101         | 0         | 0.00%         | 196          | 0         | 0.00%         | 1.00 [0e+00-Inf]     | 1.000    | 1.000   |
| HEY1       | 101         | 0         | 0.00%         | 196          | 0         | 0.00%         | 1.00 [0e+00-Inf]     | 1.000    | 1.000   |
| HGSNAT     | 101         | 0         | 0.00%         | 196          | 0         | 0.00%         | 1.00 [0e+00-Inf]     | 1.000    | 1.000   |
| HGS        | 101         | 0         | 0.00%         | 196          | 0         | 0.00%         | 1.00 [0e+00-Inf]     | 1.000    | 1.000   |
| HHAT       | 101         | 0         | 0.00%         | 196          | 0         | 0.00%         | 1.00 [0e+00-Inf]     | 1.000    | 1.000   |
| HHIPL2     | 101         | 0         | 0.00%         | 196          | 0         | 0.00%         | 1.00 [0e+00-Inf]     | 1.000    | 1.000   |
| HHLA1      | 101         | 0         | 0.00%         | 196          | 0         | 0.00%         | 1.00 [0e+00-Inf]     | 1.000    | 1.000   |
| HIBADH     | 101         | 0         | 0.00%         | 196          | 0         | 0.00%         | 1.00 [0e+00-Inf]     | 1.000    | 1.000   |
| HILS1      | 101         | 0         | 0.00%         | 196          | 0         | 0.00%         | 1.00 [0e+00-Inf]     | 1.000    | 1.000   |
| HIRIP3     | 101         | 0         | 0.00%         | 196          | 0         | 0.00%         | 1.00 [0e+00-Inf]     | 1.000    | 1.000   |
| HIST2H2AA3 | 101         | 0         | 0.00%         | 196          | 0         | 0.00%         | 1.00 [0e+00-Inf]     | 1.000    | 1.000   |
| HIST2H2AB  | 101         | 0         | 0.00%         | 196          | 0         | 0.00%         | 1.00 [0e+00-Inf]     | 1.000    | 1.000   |
| HIST2H2AC  | 101         | 0         | 0.00%         | 196          | 0         | 0.00%         | 1.00 [0e+00-Inf]     | 1.000    | 1.000   |
| HIST2H2BE  | 101         | 0         | 0.00%         | 196          | 0         | 0.00%         | 1.00 [0e+00-Inf]     | 1.000    | 1.000   |
| HIST2H2BF  | 101         | 0         | 0.00%         | 196          | 0         | 0.00%         | 1.00 [0e+00-Inf]     | 1.000    | 1.000   |
| HIST2H3C   | 101         | 0         | 0.00%         | 196          | 0         | 0.00%         | 1.00 [0e+00-Inf]     | 1.000    | 1.000   |
| HIST2H3D   | 101         | 0         | 0.00%         | 196          | 0         | 0.00%         | 1.00 [0e+00-Inf]     | 1.000    | 1.000   |
| HIST2H4A   | 101         | 0         | 0.00%         | 196          | 0         | 0.00%         | 1.00 [0e+00-Inf]     | 1.000    | 1.000   |
| HIST3H2A   | 101         | 0         | 0.00%         | 196          | 0         | 0.00%         | 1.00 [0e+00-Inf]     | 1.000    | 1.000   |
| HIST3H2BB  | 101         | 0         | 0.00%         | 196          | 0         | 0.00%         | 1.00 [0e+00-Inf]     | 1.000    | 1.000   |
| HIST3H3    | 101         | 0         | 0.00%         | 196          | 0         | 0.00%         | 1.00 [0e+00-Inf]     | 1.000    | 1.000   |
| HLA-DRB1   | 101         | 0         | 0.00%         | 196          | 0         | 0.00%         | 1.00 [0e+00-Inf]     | 1.000    | 1.000   |
| HLA-DRB5   | 101         | 0         | 0.00%         | 196          | 0         | 0.00%         | 1.00 [0e+00-Inf]     | 1.000    | 1.000   |
| HLA-DRB6   | 101         | 0         | 0.00%         | 196          | 0         | 0.00%         | 1.00 [0e+00-Inf]     | 1.000    | 1.000   |
| HLF        | 101         | 0         | 0.00%         | 196          | 0         | 0.00%         | 1.00 [0e+00-Inf]     | 1.000    | 1.000   |

| Symbol    | CINSARC Low |           |               | CINSARC High |           |               | CINSARC High vs. Low |          |         |
|-----------|-------------|-----------|---------------|--------------|-----------|---------------|----------------------|----------|---------|
|           | N tested    | N altered | Fq alteration | N tested     | N altered | Fq alteration | OR [95%CI]           | p-value* | q-value |
| HLX       | 101         | 0         | 0.00%         | 196          | 0         | 0.00%         | 1.00 [0e+00-Inf]     | 1.000    | 1.000   |
| HMCN1     | 101         | 0         | 0.00%         | 196          | 0         | 0.00%         | 1.00 [0e+00-Inf]     | 1.000    | 1.000   |
| HMGA2     | 101         | 0         | 0.00%         | 196          | 1         | 0.51%         | 3.2e+07 [0e+00-Inf]  | 0.997    | 1.000   |
| HMGB1     | 101         | 0         | 0.00%         | 196          | 0         | 0.00%         | 1.00 [0e+00-Inf]     | 1.000    | 1.000   |
| HMGB3P1   | 101         | 0         | 0.00%         | 196          | 0         | 0.00%         | 1.00 [0e+00-Inf]     | 1.000    | 1.000   |
| HMOX2     | 101         | 0         | 0.00%         | 196          | 0         | 0.00%         | 1.00 [0e+00-Inf]     | 1.000    | 1.000   |
| HMSD      | 101         | 0         | 0.00%         | 196          | 0         | 0.00%         | 1.00 [0e+00-Inf]     | 1.000    | 1.000   |
| HNF1B     | 101         | 0         | 0.00%         | 196          | 0         | 0.00%         | 1.00 [0e+00-Inf]     | 1.000    | 1.000   |
| HNF4A     | 101         | 0         | 0.00%         | 196          | 0         | 0.00%         | 1.00 [0e+00-Inf]     | 1.000    | 1.000   |
| HNF4G     | 101         | 0         | 0.00%         | 196          | 0         | 0.00%         | 1.00 [0e+00-Inf]     | 1.000    | 1.000   |
| HNRNPA2B1 | 101         | 0         | 0.00%         | 196          | 0         | 0.00%         | 1.00 [0e+00-Inf]     | 1.000    | 1.000   |
| HNRNPU    | 101         | 0         | 0.00%         | 196          | 0         | 0.00%         | 1.00 [0e+00-Inf]     | 1.000    | 1.000   |
| HOMER2    | 101         | 0         | 0.00%         | 196          | 0         | 0.00%         | 1.00 [0e+00-Inf]     | 1.000    | 1.000   |
| HOOK3     | 101         | 0         | 0.00%         | 196          | 0         | 0.00%         | 1.00 [0e+00-Inf]     | 1.000    | 1.000   |
| HORMAD1   | 101         | 0         | 0.00%         | 196          | 0         | 0.00%         | 1.00 [0e+00-Inf]     | 1.000    | 1.000   |
| HOXA10    | 101         | 0         | 0.00%         | 196          | 0         | 0.00%         | 1.00 [0e+00-Inf]     | 1.000    | 1.000   |
| HOXA11-AS | 101         | 0         | 0.00%         | 196          | 0         | 0.00%         | 1.00 [0e+00-Inf]     | 1.000    | 1.000   |
| HOXA11    | 101         | 0         | 0.00%         | 196          | 0         | 0.00%         | 1.00 [0e+00-Inf]     | 1.000    | 1.000   |
| HOXA13    | 101         | 0         | 0.00%         | 196          | 0         | 0.00%         | 1.00 [0e+00-Inf]     | 1.000    | 1.000   |
| HOXA1     | 101         | 0         | 0.00%         | 196          | 0         | 0.00%         | 1.00 [0e+00-Inf]     | 1.000    | 1.000   |
| HOXA2     | 101         | 0         | 0.00%         | 196          | 0         | 0.00%         | 1.00 [0e+00-Inf]     | 1.000    | 1.000   |
| HOXA3     | 101         | 0         | 0.00%         | 196          | 0         | 0.00%         | 1.00 [0e+00-Inf]     | 1.000    | 1.000   |
| HOXA4     | 101         | 0         | 0.00%         | 196          | 0         | 0.00%         | 1.00 [0e+00-Inf]     | 1.000    | 1.000   |
| HOXA5     | 101         | 0         | 0.00%         | 196          | 0         | 0.00%         | 1.00 [0e+00-Inf]     | 1.000    | 1.000   |
| HOXA6     | 101         | 0         | 0.00%         | 196          | 0         | 0.00%         | 1.00 [0e+00-Inf]     | 1.000    | 1.000   |
| HOXA7     | 101         | 0         | 0.00%         | 196          | 0         | 0.00%         | 1.00 [0e+00-Inf]     | 1.000    | 1.000   |
| HOXA9     | 101         | 0         | 0.00%         | 196          | 0         | 0.00%         | 1.00 [0e+00-Inf]     | 1.000    | 1.000   |
| HOXB13    | 101         | 0         | 0.00%         | 196          | 0         | 0.00%         | 1.00 [0e+00-Inf]     | 1.000    | 1.000   |
| HOXB1     | 101         | 0         | 0.00%         | 196          | 0         | 0.00%         | 1.00 [0e+00-Inf]     | 1.000    | 1.000   |
| HOXB2     | 101         | 0         | 0.00%         | 196          | 0         | 0.00%         | 1.00 [0e+00-Inf]     | 1.000    | 1.000   |
| HOXB3     | 101         | 0         | 0.00%         | 196          | 0         | 0.00%         | 1.00 [0e+00-Inf]     | 1.000    | 1.000   |
| HOXB4     | 101         | 0         | 0.00%         | 196          | 0         | 0.00%         | 1.00 [0e+00-Inf]     | 1.000    | 1.000   |
| HOXB5     | 101         | 0         | 0.00%         | 196          | 0         | 0.00%         | 1.00 [0e+00-Inf]     | 1.000    | 1.000   |
| HOXB6     | 101         | 0         | 0.00%         | 196          | 0         | 0.00%         | 1.00 [0e+00-Inf]     | 1.000    | 1.000   |
| HOXB7     | 101         | 0         | 0.00%         | 196          | 0         | 0.00%         | 1.00 [0e+00-Inf]     | 1.000    | 1.000   |
| HOXB8     | 101         | 0         | 0.00%         | 196          | 0         | 0.00%         | 1.00 [0e+00-Inf]     | 1.000    | 1.000   |
| HOXB9     | 101         | 0         | 0.00%         | 196          | 0         | 0.00%         | 1.00 [0e+00-Inf]     | 1.000    | 1.000   |
| HPS3      | 101         | 0         | 0.00%         | 196          | 0         | 0.00%         | 1.00 [0e+00-Inf]     | 1.000    | 1.000   |
| HPYR1     | 101         | 0         | 0.00%         | 196          | 0         | 0.00%         | 1.00 [0e+00-Inf]     | 1.000    | 1.000   |
| HRH3      | 101         | 0         | 0.00%         | 196          | 0         | 0.00%         | 1.00 [0e+00-Inf]     | 1.000    | 1.000   |
| RBFOX3    | 101         | 0         | 0.00%         | 196          | 0         | 0.00%         | 1.00 [0e+00-Inf]     | 1.000    | 1.000   |
| HRNR      | 101         | 0         | 0.00%         | 196          | 0         | 0.00%         | 1.00 [0e+00-Inf]     | 1.000    | 1.000   |
| HS3ST2    | 101         | 0         | 0.00%         | 196          | 0         | 0.00%         | 1.00 [0e+00-Inf]     | 1.000    | 1.000   |
| HS3ST4    | 101         | 0         | 0.00%         | 196          | 0         | 0.00%         | 1.00 [0e+00-Inf]     | 1.000    | 1.000   |
| HS3ST6    | 101         | 0         | 0.00%         | 196          | 0         | 0.00%         | 1.00 [0e+00-Inf]     | 1.000    | 1.000   |
| HSD11B1   | 101         | 0         | 0.00%         | 196          | 0         | 0.00%         | 1.00 [0e+00-Inf]     | 1.000    | 1.000   |
| HSD17B7   | 101         | 0         | 0.00%         | 196          | 0         | 0.00%         | 1.00 [0e+00-Inf]     | 1.000    | 1.000   |
| HSD3B7    | 101         | 0         | 0.00%         | 196          | 0         | 0.00%         | 1.00 [0e+00-Inf]     | 1.000    | 1.000   |
| HSF1      | 101         | 0         | 0.00%         | 196          | 0         | 0.00%         | 1.00 [0e+00-Inf]     | 1.000    | 1.000   |
| HSF5      | 101         | 0         | 0.00%         | 196          | 0         | 0.00%         | 1.00 [0e+00-Inf]     | 1.000    | 1.000   |
| HSFY2     | 101         | 65        | 64.36%        | 196          | 117       | 59.69%        | 0.82 [0.54-1.25]     | 0.435    | 1.000   |
| HSPA6     | 101         | 0         | 0.00%         | 196          | 0         | 0.00%         | 1.00 [0e+00-Inf]     | 1.000    | 1.000   |
| HSPA7     | 101         | 0         | 0.00%         | 196          | 0         | 0.00%         | 1.00 [0e+00-Inf]     | 1.000    | 1.000   |
| HTR3C     | 101         | 0         | 0.00%         | 196          | 0         | 0.00%         | 1.00 [0e+00-Inf]     | 1.000    | 1.000   |
| HTR3D     | 101         | 0         | 0.00%         | 196          | 0         | 0.00%         | 1.00 [0e+00-Inf]     | 1.000    | 1.000   |
| HTR3E     | 101         | 0         | 0.00%         | 196          | 0         | 0.00%         | 1.00 [0e+00-Inf]     | 1.000    | 1.000   |
| HTRA4     | 101         | 0         | 0.00%         | 196          | 0         | 0.00%         | 1.00 [0e+00-Inf]     | 1.000    | 1.000   |
| IARS2     | 101         | 0         | 0.00%         | 196          | 0         | 0.00%         | 1.00 [0e+00-Inf]     | 1.000    | 1.000   |
| ICAM2     | 101         | 0         | 0.00%         | 196          | 0         | 0.00%         | 1.00 [0e+00-Inf]     | 1.000    | 1.000   |
| IDH2      | 101         | 0         | 0.00%         | 196          | 0         | 0.00%         | 1.00 [0e+00-Inf]     | 1.000    | 1.000   |
| IDO1      | 101         | 0         | 0.00%         | 196          | 0         | 0.00%         | 1.00 [0e+00-Inf]     | 1.000    | 1.000   |
| IDO2      | 101         | 0         | 0.00%         | 196          | 0         | 0.00%         | 1.00 [0e+00-Inf]     | 1.000    | 1.000   |
| IER5      | 101         | 0         | 0.00%         | 196          | 0         | 0.00%         | 1.00 [0e+00-Inf]     | 1.000    | 1.000   |
| IFI16     | 101         | 0         | 0.00%         | 196          | 0         | 0.00%         | 1.00 [0e+00-Inf]     | 1.000    | 1.000   |
| IFNG      | 101         | 0         | 0.00%         | 196          | 0         | 0.00%         | 1.00 [0e+00-Inf]     | 1.000    | 1.000   |
| IFT140    | 101         | 0         | 0.00%         | 196          | 0         | 0.00%         | 1.00 [0e+00-Inf]     | 1.000    | 1.000   |
| IFT20     | 101         | 0         | 0.00%         | 196          | 0         | 0.00%         | 1.00 [0e+00-Inf]     | 1.000    | 1.000   |
| IFT52     | 101         | 0         | 0.00%         | 196          | 0         | 0.00%         | 1.00 [0e+00-Inf]     | 1.000    | 1.000   |
| IGF1R     | 101         | 0         | 0.00%         | 196          | 0         | 0.00%         | 1.00 [0e+00-Inf]     | 1.000    | 1.000   |
| IGF2BP1   | 101         | 0         | 0.00%         | 196          | 0         | 0.00%         | 1.00 [0e+00-Inf]     | 1.000    | 1.000   |
| IGF2BP2   | 101         | 0         | 0.00%         | 196          | 0         | 0.00%         | 1.00 [0e+00-Inf]     | 1.000    | 1.000   |



| Symbol   | CINSARC Low |           |               | CINSARC High |           |               | CINSARC High vs. Low |          |         |
|----------|-------------|-----------|---------------|--------------|-----------|---------------|----------------------|----------|---------|
|          | N tested    | N altered | Fq alteration | N tested     | N altered | Fq alteration | OR [95%CI]           | p-value* | q-value |
| JAZF1    | 101         | 0         | 0.00%         | 196          | 0         | 0.00%         | 1.00 [0e+00-Inf]     | 1.000    | 1.000   |
| JMJD4    | 101         | 0         | 0.00%         | 196          | 0         | 0.00%         | 1.00 [0e+00-Inf]     | 1.000    | 1.000   |
| KDM8     | 101         | 0         | 0.00%         | 196          | 0         | 0.00%         | 1.00 [0e+00-Inf]     | 1.000    | 1.000   |
| JMJD6    | 101         | 0         | 0.00%         | 196          | 0         | 0.00%         | 1.00 [0e+00-Inf]     | 1.000    | 1.000   |
| JMJD8    | 101         | 0         | 0.00%         | 196          | 0         | 0.00%         | 1.00 [0e+00-Inf]     | 1.000    | 1.000   |
| JPH1     | 101         | 0         | 0.00%         | 196          | 0         | 0.00%         | 1.00 [0e+00-Inf]     | 1.000    | 1.000   |
| JPH2     | 101         | 0         | 0.00%         | 196          | 0         | 0.00%         | 1.00 [0e+00-Inf]     | 1.000    | 1.000   |
| JRK      | 101         | 0         | 0.00%         | 196          | 0         | 0.00%         | 1.00 [0e+00-Inf]     | 1.000    | 1.000   |
| JTB      | 101         | 0         | 0.00%         | 196          | 0         | 0.00%         | 1.00 [0e+00-Inf]     | 1.000    | 1.000   |
| KATNAL1  | 101         | 0         | 0.00%         | 196          | 0         | 0.00%         | 1.00 [0e+00-Inf]     | 1.000    | 1.000   |
| KBTBD2   | 101         | 0         | 0.00%         | 196          | 0         | 0.00%         | 1.00 [0e+00-Inf]     | 1.000    | 1.000   |
| KCNB1    | 101         | 0         | 0.00%         | 196          | 0         | 0.00%         | 1.00 [0e+00-Inf]     | 1.000    | 1.000   |
| KCNB2    | 101         | 0         | 0.00%         | 196          | 0         | 0.00%         | 1.00 [0e+00-Inf]     | 1.000    | 1.000   |
| KCNC1    | 101         | 0         | 0.00%         | 196          | 0         | 0.00%         | 1.00 [0e+00-Inf]     | 1.000    | 1.000   |
| KCNC2    | 101         | 0         | 0.00%         | 196          | 0         | 0.00%         | 1.00 [0e+00-Inf]     | 1.000    | 1.000   |
| KCNE3    | 101         | 0         | 0.00%         | 196          | 0         | 0.00%         | 1.00 [0e+00-Inf]     | 1.000    | 1.000   |
| KCNG1    | 101         | 0         | 0.00%         | 196          | 0         | 0.00%         | 1.00 [0e+00-Inf]     | 1.000    | 1.000   |
| KCNH1    | 101         | 0         | 0.00%         | 196          | 0         | 0.00%         | 1.00 [0e+00-Inf]     | 1.000    | 1.000   |
| KCNH6    | 101         | 0         | 0.00%         | 196          | 0         | 0.00%         | 1.00 [0e+00-Inf]     | 1.000    | 1.000   |
| KCNJ10   | 101         | 0         | 0.00%         | 196          | 0         | 0.00%         | 1.00 [0e+00-Inf]     | 1.000    | 1.000   |
| KCNJ11   | 101         | 0         | 0.00%         | 196          | 0         | 0.00%         | 1.00 [0e+00-Inf]     | 1.000    | 1.000   |
| KCNJ16   | 101         | 0         | 0.00%         | 196          | 0         | 0.00%         | 1.00 [0e+00-Inf]     | 1.000    | 1.000   |
| KCNJ2    | 101         | 0         | 0.00%         | 196          | 0         | 0.00%         | 1.00 [0e+00-Inf]     | 1.000    | 1.000   |
| KCNJ9    | 101         | 0         | 0.00%         | 196          | 0         | 0.00%         | 1.00 [0e+00-Inf]     | 1.000    | 1.000   |
| KCNK15   | 101         | 0         | 0.00%         | 196          | 0         | 0.00%         | 1.00 [0e+00-Inf]     | 1.000    | 1.000   |
| KCNK1    | 101         | 0         | 0.00%         | 196          | 0         | 0.00%         | 1.00 [0e+00-Inf]     | 1.000    | 1.000   |
| KCNK2    | 101         | 0         | 0.00%         | 196          | 0         | 0.00%         | 1.00 [0e+00-Inf]     | 1.000    | 1.000   |
| KCNK9    | 101         | 0         | 0.00%         | 196          | 0         | 0.00%         | 1.00 [0e+00-Inf]     | 1.000    | 1.000   |
| KCNMB2   | 101         | 0         | 0.00%         | 196          | 0         | 0.00%         | 1.00 [0e+00-Inf]     | 1.000    | 1.000   |
| KCNMB3   | 101         | 0         | 0.00%         | 196          | 0         | 0.00%         | 1.00 [0e+00-Inf]     | 1.000    | 1.000   |
| KCNMB4   | 101         | 0         | 0.00%         | 196          | 0         | 0.00%         | 1.00 [0e+00-Inf]     | 1.000    | 1.000   |
| KCNN3    | 101         | 0         | 0.00%         | 196          | 0         | 0.00%         | 1.00 [0e+00-Inf]     | 1.000    | 1.000   |
| KCNQ2    | 101         | 0         | 0.00%         | 196          | 0         | 0.00%         | 1.00 [0e+00-Inf]     | 1.000    | 1.000   |
| KCNQ3    | 101         | 0         | 0.00%         | 196          | 0         | 0.00%         | 1.00 [0e+00-Inf]     | 1.000    | 1.000   |
| KCNS1    | 101         | 0         | 0.00%         | 196          | 0         | 0.00%         | 1.00 [0e+00-Inf]     | 1.000    | 1.000   |
| KCNS2    | 101         | 0         | 0.00%         | 196          | 0         | 0.00%         | 1.00 [0e+00-Inf]     | 1.000    | 1.000   |
| KCNT2    | 101         | 0         | 0.00%         | 196          | 0         | 0.00%         | 1.00 [0e+00-Inf]     | 1.000    | 1.000   |
| KCNU1    | 101         | 0         | 0.00%         | 196          | 0         | 0.00%         | 1.00 [0e+00-Inf]     | 1.000    | 1.000   |
| KCNV1    | 101         | 0         | 0.00%         | 196          | 0         | 0.00%         | 1.00 [0e+00-Inf]     | 1.000    | 1.000   |
| KCTD13   | 101         | 0         | 0.00%         | 196          | 0         | 0.00%         | 1.00 [0e+00-Inf]     | 1.000    | 1.000   |
| KCTD14   | 101         | 0         | 0.00%         | 196          | 0         | 0.00%         | 1.00 [0e+00-Inf]     | 1.000    | 1.000   |
| KCTD21   | 101         | 0         | 0.00%         | 196          | 0         | 0.00%         | 1.00 [0e+00-Inf]     | 1.000    | 1.000   |
| KCTD2    | 101         | 0         | 0.00%         | 196          | 0         | 0.00%         | 1.00 [0e+00-Inf]     | 1.000    | 1.000   |
| KCTD3    | 101         | 0         | 0.00%         | 196          | 0         | 0.00%         | 1.00 [0e+00-Inf]     | 1.000    | 1.000   |
| KCTD5    | 101         | 0         | 0.00%         | 196          | 0         | 0.00%         | 1.00 [0e+00-Inf]     | 1.000    | 1.000   |
| KDM2A    | 101         | 0         | 0.00%         | 196          | 0         | 0.00%         | 1.00 [0e+00-Inf]     | 1.000    | 1.000   |
| KDM5B    | 101         | 0         | 0.00%         | 196          | 0         | 0.00%         | 1.00 [0e+00-Inf]     | 1.000    | 1.000   |
| KDM5D    | 101         | 64        | 63.37%        | 196          | 116       | 59.18%        | 0.84 [0.55-1.27]     | 0.485    | 1.000   |
| KDSR     | 101         | 0         | 0.00%         | 196          | 0         | 0.00%         | 1.00 [0e+00-Inf]     | 1.000    | 1.000   |
| KEL      | 101         | 0         | 0.00%         | 196          | 0         | 0.00%         | 1.00 [0e+00-Inf]     | 1.000    | 1.000   |
| KERA     | 101         | 1         | 0.99%         | 196          | 0         | 0.00%         | 1.6e-08 [0e+00-Inf]  | 0.996    | 1.000   |
| KHDRBS3  | 101         | 0         | 0.00%         | 196          | 0         | 0.00%         | 1.00 [0e+00-Inf]     | 1.000    | 1.000   |
| KIAA0040 | 101         | 0         | 0.00%         | 196          | 0         | 0.00%         | 1.00 [0e+00-Inf]     | 1.000    | 1.000   |
| KIAA0087 | 101         | 0         | 0.00%         | 196          | 0         | 0.00%         | 1.00 [0e+00-Inf]     | 1.000    | 1.000   |
| KIAA0100 | 101         | 0         | 0.00%         | 196          | 0         | 0.00%         | 1.00 [0e+00-Inf]     | 1.000    | 1.000   |
| SPIDR    | 101         | 0         | 0.00%         | 196          | 0         | 0.00%         | 1.00 [0e+00-Inf]     | 1.000    | 1.000   |
| KIAA0391 | 101         | 0         | 0.00%         | 196          | 0         | 0.00%         | 1.00 [0e+00-Inf]     | 1.000    | 1.000   |
| TTI1     | 101         | 0         | 0.00%         | 196          | 0         | 0.00%         | 1.00 [0e+00-Inf]     | 1.000    | 1.000   |
| KIAA0556 | 101         | 0         | 0.00%         | 196          | 0         | 0.00%         | 1.00 [0e+00-Inf]     | 1.000    | 1.000   |
| CLUHP3   | 101         | 0         | 0.00%         | 196          | 0         | 0.00%         | 1.00 [0e+00-Inf]     | 1.000    | 1.000   |
| ZSWIM8   | 101         | 0         | 0.00%         | 196          | 0         | 0.00%         | 1.00 [0e+00-Inf]     | 1.000    | 1.000   |
| MAP10    | 101         | 0         | 0.00%         | 196          | 0         | 0.00%         | 1.00 [0e+00-Inf]     | 1.000    | 1.000   |
| KIAA1614 | 101         | 0         | 0.00%         | 196          | 0         | 0.00%         | 1.00 [0e+00-Inf]     | 1.000    | 1.000   |
| KIAA1755 | 101         | 0         | 0.00%         | 196          | 0         | 0.00%         | 1.00 [0e+00-Inf]     | 1.000    | 1.000   |
| KIF14    | 101         | 0         | 0.00%         | 196          | 0         | 0.00%         | 1.00 [0e+00-Inf]     | 1.000    | 1.000   |
| KIF19    | 101         | 0         | 0.00%         | 196          | 0         | 0.00%         | 1.00 [0e+00-Inf]     | 1.000    | 1.000   |
| KIF21B   | 101         | 0         | 0.00%         | 196          | 0         | 0.00%         | 1.00 [0e+00-Inf]     | 1.000    | 1.000   |
| KIF22    | 101         | 0         | 0.00%         | 196          | 0         | 0.00%         | 1.00 [0e+00-Inf]     | 1.000    | 1.000   |
| KIF26B   | 101         | 0         | 0.00%         | 196          | 0         | 0.00%         | 1.00 [0e+00-Inf]     | 1.000    | 1.000   |
| KIF2B    | 101         | 0         | 0.00%         | 196          | 0         | 0.00%         | 1.00 [0e+00-Inf]     | 1.000    | 1.000   |
| KIF7     | 101         | 0         | 0.00%         | 196          | 0         | 0.00%         | 1.00 [0e+00-Inf]     | 1.000    | 1.000   |



| Symbol    | CINSARC Low |           |               | CINSARC High |           |               | CINSARC High vs. Low |          |         |
|-----------|-------------|-----------|---------------|--------------|-----------|---------------|----------------------|----------|---------|
|           | N tested    | N altered | Fq alteration | N tested     | N altered | Fq alteration | OR [95%CI]           | p-value* | q-value |
| KIFAP3    | 101         | 0         | 0.00%         | 196          | 0         | 0.00%         | 1.00 [0e+00-Inf]     | 1.000    | 1.000   |
| KIFC2     | 101         | 0         | 0.00%         | 196          | 0         | 0.00%         | 1.00 [0e+00-Inf]     | 1.000    | 1.000   |
| KIR2DL1   | 101         | 0         | 0.00%         | 196          | 0         | 0.00%         | 1.00 [0e+00-Inf]     | 1.000    | 1.000   |
| KIR2DL3   | 101         | 0         | 0.00%         | 196          | 0         | 0.00%         | 1.00 [0e+00-Inf]     | 1.000    | 1.000   |
| KIR2DL4   | 101         | 0         | 0.00%         | 196          | 0         | 0.00%         | 1.00 [0e+00-Inf]     | 1.000    | 1.000   |
| KIR3DL1   | 101         | 0         | 0.00%         | 196          | 0         | 0.00%         | 1.00 [0e+00-Inf]     | 1.000    | 1.000   |
| KIR3DL3   | 101         | 0         | 0.00%         | 196          | 0         | 0.00%         | 1.00 [0e+00-Inf]     | 1.000    | 1.000   |
| KISS1     | 101         | 0         | 0.00%         | 196          | 0         | 0.00%         | 1.00 [0e+00-Inf]     | 1.000    | 1.000   |
| KITLG     | 101         | 0         | 0.00%         | 196          | 0         | 0.00%         | 1.00 [0e+00-Inf]     | 1.000    | 1.000   |
| KLC2      | 101         | 0         | 0.00%         | 196          | 0         | 0.00%         | 1.00 [0e+00-Inf]     | 1.000    | 1.000   |
| KLF10     | 101         | 0         | 0.00%         | 196          | 0         | 0.00%         | 1.00 [0e+00-Inf]     | 1.000    | 1.000   |
| KLHDC8A   | 101         | 0         | 0.00%         | 196          | 0         | 0.00%         | 1.00 [0e+00-Inf]     | 1.000    | 1.000   |
| KLHDC9    | 101         | 0         | 0.00%         | 196          | 0         | 0.00%         | 1.00 [0e+00-Inf]     | 1.000    | 1.000   |
| KLHL12    | 101         | 0         | 0.00%         | 196          | 0         | 0.00%         | 1.00 [0e+00-Inf]     | 1.000    | 1.000   |
| KLHL20    | 101         | 0         | 0.00%         | 196          | 0         | 0.00%         | 1.00 [0e+00-Inf]     | 1.000    | 1.000   |
| KLHL24    | 101         | 0         | 0.00%         | 196          | 0         | 0.00%         | 1.00 [0e+00-Inf]     | 1.000    | 1.000   |
| KLHL25    | 101         | 0         | 0.00%         | 196          | 0         | 0.00%         | 1.00 [0e+00-Inf]     | 1.000    | 1.000   |
| KLHL35    | 101         | 0         | 0.00%         | 196          | 0         | 0.00%         | 1.00 [0e+00-Inf]     | 1.000    | 1.000   |
| KLHL38    | 101         | 0         | 0.00%         | 196          | 0         | 0.00%         | 1.00 [0e+00-Inf]     | 1.000    | 1.000   |
| KLHL6     | 101         | 0         | 0.00%         | 196          | 0         | 0.00%         | 1.00 [0e+00-Inf]     | 1.000    | 1.000   |
| KLHL7     | 101         | 0         | 0.00%         | 196          | 0         | 0.00%         | 1.00 [0e+00-Inf]     | 1.000    | 1.000   |
| KMO       | 101         | 0         | 0.00%         | 196          | 0         | 0.00%         | 1.00 [0e+00-Inf]     | 1.000    | 1.000   |
| KPNA2     | 101         | 0         | 0.00%         | 196          | 0         | 0.00%         | 1.00 [0e+00-Inf]     | 1.000    | 1.000   |
| KPNB1     | 101         | 0         | 0.00%         | 196          | 0         | 0.00%         | 1.00 [0e+00-Inf]     | 1.000    | 1.000   |
| KPRP      | 101         | 0         | 0.00%         | 196          | 0         | 0.00%         | 1.00 [0e+00-Inf]     | 1.000    | 1.000   |
| KREMEN2   | 101         | 0         | 0.00%         | 196          | 0         | 0.00%         | 1.00 [0e+00-Inf]     | 1.000    | 1.000   |
| KRR1      | 101         | 0         | 0.00%         | 196          | 0         | 0.00%         | 1.00 [0e+00-Inf]     | 1.000    | 1.000   |
| KRT10     | 101         | 0         | 0.00%         | 196          | 0         | 0.00%         | 1.00 [0e+00-Inf]     | 1.000    | 1.000   |
| KRT12     | 101         | 0         | 0.00%         | 196          | 0         | 0.00%         | 1.00 [0e+00-Inf]     | 1.000    | 1.000   |
| KRT222    | 101         | 0         | 0.00%         | 196          | 0         | 0.00%         | 1.00 [0e+00-Inf]     | 1.000    | 1.000   |
| KRT23     | 101         | 0         | 0.00%         | 196          | 0         | 0.00%         | 1.00 [0e+00-Inf]     | 1.000    | 1.000   |
| KRT24     | 101         | 0         | 0.00%         | 196          | 0         | 0.00%         | 1.00 [0e+00-Inf]     | 1.000    | 1.000   |
| KRT25     | 101         | 0         | 0.00%         | 196          | 0         | 0.00%         | 1.00 [0e+00-Inf]     | 1.000    | 1.000   |
| KRT26     | 101         | 0         | 0.00%         | 196          | 0         | 0.00%         | 1.00 [0e+00-Inf]     | 1.000    | 1.000   |
| KRT27     | 101         | 0         | 0.00%         | 196          | 0         | 0.00%         | 1.00 [0e+00-Inf]     | 1.000    | 1.000   |
| KRT28     | 101         | 0         | 0.00%         | 196          | 0         | 0.00%         | 1.00 [0e+00-Inf]     | 1.000    | 1.000   |
| KRT34     | 101         | 0         | 0.00%         | 196          | 0         | 0.00%         | 1.00 [0e+00-Inf]     | 1.000    | 1.000   |
| KRTAP5-10 | 101         | 0         | 0.00%         | 196          | 0         | 0.00%         | 1.00 [0e+00-Inf]     | 1.000    | 1.000   |
| KRTAP5-11 | 101         | 0         | 0.00%         | 196          | 0         | 0.00%         | 1.00 [0e+00-Inf]     | 1.000    | 1.000   |
| KRTAP5-7  | 101         | 0         | 0.00%         | 196          | 0         | 0.00%         | 1.00 [0e+00-Inf]     | 1.000    | 1.000   |
| KRTAP5-8  | 101         | 0         | 0.00%         | 196          | 0         | 0.00%         | 1.00 [0e+00-Inf]     | 1.000    | 1.000   |
| KRTAP5-9  | 101         | 0         | 0.00%         | 196          | 0         | 0.00%         | 1.00 [0e+00-Inf]     | 1.000    | 1.000   |
| KRTCAP2   | 101         | 0         | 0.00%         | 196          | 0         | 0.00%         | 1.00 [0e+00-Inf]     | 1.000    | 1.000   |
| KSR1      | 101         | 0         | 0.00%         | 196          | 0         | 0.00%         | 1.00 [0e+00-Inf]     | 1.000    | 1.000   |
| L3MBTL1   | 101         | 0         | 0.00%         | 196          | 0         | 0.00%         | 1.00 [0e+00-Inf]     | 1.000    | 1.000   |
| LACTB2    | 101         | 0         | 0.00%         | 196          | 0         | 0.00%         | 1.00 [0e+00-Inf]     | 1.000    | 1.000   |
| LAD1      | 101         | 0         | 0.00%         | 196          | 0         | 0.00%         | 1.00 [0e+00-Inf]     | 1.000    | 1.000   |
| LAMA5     | 101         | 0         | 0.00%         | 196          | 0         | 0.00%         | 1.00 [0e+00-Inf]     | 1.000    | 1.000   |
| LAMB3     | 101         | 0         | 0.00%         | 196          | 0         | 0.00%         | 1.00 [0e+00-Inf]     | 1.000    | 1.000   |
| LAMC1     | 101         | 0         | 0.00%         | 196          | 0         | 0.00%         | 1.00 [0e+00-Inf]     | 1.000    | 1.000   |
| LAMC2     | 101         | 0         | 0.00%         | 196          | 0         | 0.00%         | 1.00 [0e+00-Inf]     | 1.000    | 1.000   |
| LAMP3     | 101         | 0         | 0.00%         | 196          | 0         | 0.00%         | 1.00 [0e+00-Inf]     | 1.000    | 1.000   |
| LAPTM4B   | 101         | 0         | 0.00%         | 196          | 0         | 0.00%         | 1.00 [0e+00-Inf]     | 1.000    | 1.000   |
| LASP1     | 101         | 0         | 0.00%         | 196          | 0         | 0.00%         | 1.00 [0e+00-Inf]     | 1.000    | 1.000   |
| CERS2     | 101         | 0         | 0.00%         | 196          | 0         | 0.00%         | 1.00 [0e+00-Inf]     | 1.000    | 1.000   |
| LAT       | 101         | 0         | 0.00%         | 196          | 0         | 0.00%         | 1.00 [0e+00-Inf]     | 1.000    | 1.000   |
| LAX1      | 101         | 0         | 0.00%         | 196          | 0         | 0.00%         | 1.00 [0e+00-Inf]     | 1.000    | 1.000   |
| LBP       | 101         | 0         | 0.00%         | 196          | 0         | 0.00%         | 1.00 [0e+00-Inf]     | 1.000    | 1.000   |
| LBR       | 101         | 0         | 0.00%         | 196          | 0         | 0.00%         | 1.00 [0e+00-Inf]     | 1.000    | 1.000   |
| LCE1A     | 101         | 0         | 0.00%         | 196          | 0         | 0.00%         | 1.00 [0e+00-Inf]     | 1.000    | 1.000   |
| LCE1B     | 101         | 0         | 0.00%         | 196          | 0         | 0.00%         | 1.00 [0e+00-Inf]     | 1.000    | 1.000   |
| LCE1C     | 101         | 0         | 0.00%         | 196          | 0         | 0.00%         | 1.00 [0e+00-Inf]     | 1.000    | 1.000   |
| LCE1D     | 101         | 0         | 0.00%         | 196          | 0         | 0.00%         | 1.00 [0e+00-Inf]     | 1.000    | 1.000   |
| LCE1E     | 101         | 0         | 0.00%         | 196          | 0         | 0.00%         | 1.00 [0e+00-Inf]     | 1.000    | 1.000   |
| LCE1F     | 101         | 0         | 0.00%         | 196          | 0         | 0.00%         | 1.00 [0e+00-Inf]     | 1.000    | 1.000   |
| LCE2A     | 101         | 0         | 0.00%         | 196          | 0         | 0.00%         | 1.00 [0e+00-Inf]     | 1.000    | 1.000   |
| LCE2B     | 101         | 0         | 0.00%         | 196          | 0         | 0.00%         | 1.00 [0e+00-Inf]     | 1.000    | 1.000   |
| LCE2C     | 101         | 0         | 0.00%         | 196          | 0         | 0.00%         | 1.00 [0e+00-Inf]     | 1.000    | 1.000   |
| LCE2D     | 101         | 0         | 0.00%         | 196          | 0         | 0.00%         | 1.00 [0e+00-Inf]     | 1.000    | 1.000   |
| LCE3A     | 101         | 0         | 0.00%         | 196          | 0         | 0.00%         | 1.00 [0e+00-Inf]     | 1.000    | 1.000   |
| LCE3B     | 101         | 3         | 2.97%         | 196          | 7         | 3.57%         | 1.21 [0.38-3.83]     | 0.786    | 1.000   |

| Symbol      | CINSARC Low |           |               | CINSARC High |           |               | CINSARC High vs. Low |          |         |
|-------------|-------------|-----------|---------------|--------------|-----------|---------------|----------------------|----------|---------|
|             | N tested    | N altered | Fq alteration | N tested     | N altered | Fq alteration | OR [95%CI]           | p-value* | q-value |
| LCE3C       | 101         | 3         | 2.97%         | 196          | 8         | 4.08%         | 1.39 [0.45-4.31]     | 0.632    | 1.000   |
| LCE3D       | 101         | 0         | 0.00%         | 196          | 0         | 0.00%         | 1.00 [0e+00-Inf]     | 1.000    | 1.000   |
| LCE3E       | 101         | 0         | 0.00%         | 196          | 0         | 0.00%         | 1.00 [0e+00-Inf]     | 1.000    | 1.000   |
| LCE4A       | 101         | 0         | 0.00%         | 196          | 0         | 0.00%         | 1.00 [0e+00-Inf]     | 1.000    | 1.000   |
| LCE5A       | 101         | 0         | 0.00%         | 196          | 0         | 0.00%         | 1.00 [0e+00-Inf]     | 1.000    | 1.000   |
| LCE6A       | 101         | 0         | 0.00%         | 196          | 0         | 0.00%         | 1.00 [0e+00-Inf]     | 1.000    | 1.000   |
| LCMT1       | 101         | 0         | 0.00%         | 196          | 0         | 0.00%         | 1.00 [0e+00-Inf]     | 1.000    | 1.000   |
| LDHAL6A     | 101         | 0         | 0.00%         | 196          | 0         | 0.00%         | 1.00 [0e+00-Inf]     | 1.000    | 1.000   |
| LDHA        | 101         | 0         | 0.00%         | 196          | 0         | 0.00%         | 1.00 [0e+00-Inf]     | 1.000    | 1.000   |
| LDHC        | 101         | 0         | 0.00%         | 196          | 0         | 0.00%         | 1.00 [0e+00-Inf]     | 1.000    | 1.000   |
| LEFTY1      | 101         | 0         | 0.00%         | 196          | 0         | 0.00%         | 1.00 [0e+00-Inf]     | 1.000    | 1.000   |
| LEFTY2      | 101         | 0         | 0.00%         | 196          | 0         | 0.00%         | 1.00 [0e+00-Inf]     | 1.000    | 1.000   |
| LELP1       | 101         | 0         | 0.00%         | 196          | 0         | 0.00%         | 1.00 [0e+00-Inf]     | 1.000    | 1.000   |
| LEMD1       | 101         | 0         | 0.00%         | 196          | 0         | 0.00%         | 1.00 [0e+00-Inf]     | 1.000    | 1.000   |
| LEMD3       | 101         | 0         | 0.00%         | 196          | 0         | 0.00%         | 1.00 [0e+00-Inf]     | 1.000    | 1.000   |
| LENEP       | 101         | 0         | 0.00%         | 196          | 0         | 0.00%         | 1.00 [0e+00-Inf]     | 1.000    | 1.000   |
| LETM2       | 101         | 0         | 0.00%         | 196          | 0         | 0.00%         | 1.00 [0e+00-Inf]     | 1.000    | 1.000   |
| LGALS3BP    | 101         | 0         | 0.00%         | 196          | 0         | 0.00%         | 1.00 [0e+00-Inf]     | 1.000    | 1.000   |
| LGALS8      | 101         | 0         | 0.00%         | 196          | 0         | 0.00%         | 1.00 [0e+00-Inf]     | 1.000    | 1.000   |
| LGALS9C     | 101         | 1         | 0.99%         | 196          | 1         | 0.51%         | 0.51 [0.05-5.30]     | 0.638    | 1.000   |
| LGALS9      | 101         | 0         | 0.00%         | 196          | 0         | 0.00%         | 1.00 [0e+00-Inf]     | 1.000    | 1.000   |
| LGR5        | 101         | 0         | 0.00%         | 196          | 0         | 0.00%         | 1.00 [0e+00-Inf]     | 1.000    | 1.000   |
| LGR6        | 101         | 0         | 0.00%         | 196          | 0         | 0.00%         | 1.00 [0e+00-Inf]     | 1.000    | 1.000   |
| LHX1        | 101         | 0         | 0.00%         | 196          | 0         | 0.00%         | 1.00 [0e+00-Inf]     | 1.000    | 1.000   |
| LHX4        | 101         | 0         | 0.00%         | 196          | 0         | 0.00%         | 1.00 [0e+00-Inf]     | 1.000    | 1.000   |
| LHX9        | 101         | 0         | 0.00%         | 196          | 0         | 0.00%         | 1.00 [0e+00-Inf]     | 1.000    | 1.000   |
| LIG3        | 101         | 0         | 0.00%         | 196          | 0         | 0.00%         | 1.00 [0e+00-Inf]     | 1.000    | 1.000   |
| LIMD2       | 101         | 0         | 0.00%         | 196          | 0         | 0.00%         | 1.00 [0e+00-Inf]     | 1.000    | 1.000   |
| LIME1       | 101         | 0         | 0.00%         | 196          | 0         | 0.00%         | 1.00 [0e+00-Inf]     | 1.000    | 1.000   |
| LIN28B      | 101         | 0         | 0.00%         | 196          | 0         | 0.00%         | 1.00 [0e+00-Inf]     | 1.000    | 1.000   |
| LIN7A       | 101         | 0         | 0.00%         | 196          | 0         | 0.00%         | 1.00 [0e+00-Inf]     | 1.000    | 1.000   |
| LIN9        | 101         | 0         | 0.00%         | 196          | 0         | 0.00%         | 1.00 [0e+00-Inf]     | 1.000    | 1.000   |
| LINGO4      | 101         | 0         | 0.00%         | 196          | 0         | 0.00%         | 1.00 [0e+00-Inf]     | 1.000    | 1.000   |
| LIPH        | 101         | 0         | 0.00%         | 196          | 0         | 0.00%         | 1.00 [0e+00-Inf]     | 1.000    | 1.000   |
| LIPT2       | 101         | 0         | 0.00%         | 196          | 0         | 0.00%         | 1.00 [0e+00-Inf]     | 1.000    | 1.000   |
| LITAF       | 101         | 0         | 0.00%         | 196          | 0         | 0.00%         | 1.00 [0e+00-Inf]     | 1.000    | 1.000   |
| LIX1L       | 101         | 0         | 0.00%         | 196          | 0         | 0.00%         | 1.00 [0e+00-Inf]     | 1.000    | 1.000   |
| LLGL2       | 101         | 0         | 0.00%         | 196          | 0         | 0.00%         | 1.00 [0e+00-Inf]     | 1.000    | 1.000   |
| LLPH        | 101         | 0         | 0.00%         | 196          | 0         | 0.00%         | 1.00 [0e+00-Inf]     | 1.000    | 1.000   |
| LMAN1       | 101         | 0         | 0.00%         | 196          | 0         | 0.00%         | 1.00 [0e+00-Inf]     | 1.000    | 1.000   |
| LMF1        | 101         | 0         | 0.00%         | 196          | 0         | 0.00%         | 1.00 [0e+00-Inf]     | 1.000    | 1.000   |
| LMLN        | 101         | 0         | 0.00%         | 196          | 0         | 0.00%         | 1.00 [0e+00-Inf]     | 1.000    | 1.000   |
| LMNA        | 101         | 0         | 0.00%         | 196          | 0         | 0.00%         | 1.00 [0e+00-Inf]     | 1.000    | 1.000   |
| LMOD1       | 101         | 0         | 0.00%         | 196          | 0         | 0.00%         | 1.00 [0e+00-Inf]     | 1.000    | 1.000   |
| LMX1A       | 101         | 0         | 0.00%         | 196          | 0         | 0.00%         | 1.00 [0e+00-Inf]     | 1.000    | 1.000   |
| LOC10012678 | 101         | 0         | 0.00%         | 196          | 0         | 0.00%         | 1.00 [0e+00-Inf]     | 1.000    | 1.000   |
| LOC10013098 | 101         | 0         | 0.00%         | 196          | 0         | 0.00%         | 1.00 [0e+00-Inf]     | 1.000    | 1.000   |
| LOC10013149 | 101         | 0         | 0.00%         | 196          | 0         | 0.00%         | 1.00 [0e+00-Inf]     | 1.000    | 1.000   |
| LOC10013436 | 101         | 0         | 0.00%         | 196          | 0         | 0.00%         | 1.00 [0e+00-Inf]     | 1.000    | 1.000   |
| LOC10019098 | 101         | 1         | 0.99%         | 196          | 0         | 0.00%         | 1.6e-08 [0e+00-Inf]  | 0.996    | 1.000   |
| LOC148696   | 101         | 0         | 0.00%         | 196          | 0         | 0.00%         | 1.00 [0e+00-Inf]     | 1.000    | 1.000   |
| LOC154761   | 101         | 0         | 0.00%         | 196          | 0         | 0.00%         | 1.00 [0e+00-Inf]     | 1.000    | 1.000   |
| LOC220729   | 101         | 0         | 0.00%         | 196          | 0         | 0.00%         | 1.00 [0e+00-Inf]     | 1.000    | 1.000   |
| LOC388242   | 101         | 0         | 0.00%         | 196          | 0         | 0.00%         | 1.00 [0e+00-Inf]     | 1.000    | 1.000   |
| LOC391322   | 101         | 4         | 3.96%         | 196          | 4         | 2.04%         | 0.51 [0.16-1.65]     | 0.342    | 1.000   |
| LOC401463   | 101         | 0         | 0.00%         | 196          | 0         | 0.00%         | 1.00 [0e+00-Inf]     | 1.000    | 1.000   |
| LOC441204   | 101         | 0         | 0.00%         | 196          | 0         | 0.00%         | 1.00 [0e+00-Inf]     | 1.000    | 1.000   |
| LOC606724   | 101         | 0         | 0.00%         | 196          | 0         | 0.00%         | 1.00 [0e+00-Inf]     | 1.000    | 1.000   |
| LOC646214   | 101         | 0         | 0.00%         | 196          | 0         | 0.00%         | 1.00 [0e+00-Inf]     | 1.000    | 1.000   |
| LOC646762   | 101         | 0         | 0.00%         | 196          | 0         | 0.00%         | 1.00 [0e+00-Inf]     | 1.000    | 1.000   |
| LOC652276   | 101         | 0         | 0.00%         | 196          | 0         | 0.00%         | 1.00 [0e+00-Inf]     | 1.000    | 1.000   |
| LOC653653   | 101         | 0         | 0.00%         | 196          | 0         | 0.00%         | 1.00 [0e+00-Inf]     | 1.000    | 1.000   |
| LOC728024   | 101         | 0         | 0.00%         | 196          | 0         | 0.00%         | 1.00 [0e+00-Inf]     | 1.000    | 1.000   |
| LOC728989   | 101         | 0         | 0.00%         | 196          | 0         | 0.00%         | 1.00 [0e+00-Inf]     | 1.000    | 1.000   |
| LOR         | 101         | 0         | 0.00%         | 196          | 0         | 0.00%         | 1.00 [0e+00-Inf]     | 1.000    | 1.000   |
| LPGAT1      | 101         | 0         | 0.00%         | 196          | 0         | 0.00%         | 1.00 [0e+00-Inf]     | 1.000    | 1.000   |
| LPIN3       | 101         | 0         | 0.00%         | 196          | 0         | 0.00%         | 1.00 [0e+00-Inf]     | 1.000    | 1.000   |
| LPO         | 101         | 0         | 0.00%         | 196          | 0         | 0.00%         | 1.00 [0e+00-Inf]     | 1.000    | 1.000   |
| LPP         | 101         | 0         | 0.00%         | 196          | 0         | 0.00%         | 1.00 [0e+00-Inf]     | 1.000    | 1.000   |
| LRCH3       | 101         | 0         | 0.00%         | 196          | 0         | 0.00%         | 1.00 [0e+00-Inf]     | 1.000    | 1.000   |
| LRFN4       | 101         | 0         | 0.00%         | 196          | 0         | 0.00%         | 1.00 [0e+00-Inf]     | 1.000    | 1.000   |

| Symbol   | CINSARC Low |           |               | CINSARC High |           |               | CINSARC High vs. Low |          |         |
|----------|-------------|-----------|---------------|--------------|-----------|---------------|----------------------|----------|---------|
|          | N tested    | N altered | Fq alteration | N tested     | N altered | Fq alteration | OR [95%CI]           | p-value* | q-value |
| LRP12    | 101         | 0         | 0.00%         | 196          | 0         | 0.00%         | 1.00 [0e+00-Inf]     | 1.000    | 1.000   |
| LRP5     | 101         | 0         | 0.00%         | 196          | 0         | 0.00%         | 1.00 [0e+00-Inf]     | 1.000    | 1.000   |
| LRRC10B  | 101         | 0         | 0.00%         | 196          | 0         | 0.00%         | 1.00 [0e+00-Inf]     | 1.000    | 1.000   |
| LRRC10   | 101         | 0         | 0.00%         | 196          | 0         | 0.00%         | 1.00 [0e+00-Inf]     | 1.000    | 1.000   |
| LRRC14   | 101         | 0         | 0.00%         | 196          | 0         | 0.00%         | 1.00 [0e+00-Inf]     | 1.000    | 1.000   |
| LRRC15   | 101         | 0         | 0.00%         | 196          | 0         | 0.00%         | 1.00 [0e+00-Inf]     | 1.000    | 1.000   |
| LRRC24   | 101         | 0         | 0.00%         | 196          | 0         | 0.00%         | 1.00 [0e+00-Inf]     | 1.000    | 1.000   |
| LRRC28   | 101         | 0         | 0.00%         | 196          | 0         | 0.00%         | 1.00 [0e+00-Inf]     | 1.000    | 1.000   |
| LRRC32   | 101         | 0         | 0.00%         | 196          | 0         | 0.00%         | 1.00 [0e+00-Inf]     | 1.000    | 1.000   |
| NRROS    | 101         | 0         | 0.00%         | 196          | 0         | 0.00%         | 1.00 [0e+00-Inf]     | 1.000    | 1.000   |
| LRRC37A2 | 101         | 0         | 0.00%         | 196          | 0         | 0.00%         | 1.00 [0e+00-Inf]     | 1.000    | 1.000   |
| LRRC37A3 | 101         | 0         | 0.00%         | 196          | 0         | 0.00%         | 1.00 [0e+00-Inf]     | 1.000    | 1.000   |
| LRRC37A  | 101         | 0         | 0.00%         | 196          | 0         | 0.00%         | 1.00 [0e+00-Inf]     | 1.000    | 1.000   |
| LRRC45   | 101         | 0         | 0.00%         | 196          | 0         | 0.00%         | 1.00 [0e+00-Inf]     | 1.000    | 1.000   |
| LRRC46   | 101         | 0         | 0.00%         | 196          | 0         | 0.00%         | 1.00 [0e+00-Inf]     | 1.000    | 1.000   |
| LRRC52   | 101         | 0         | 0.00%         | 196          | 0         | 0.00%         | 1.00 [0e+00-Inf]     | 1.000    | 1.000   |
| LRRC59   | 101         | 0         | 0.00%         | 196          | 0         | 0.00%         | 1.00 [0e+00-Inf]     | 1.000    | 1.000   |
| PPP1R42  | 101         | 0         | 0.00%         | 196          | 0         | 0.00%         | 1.00 [0e+00-Inf]     | 1.000    | 1.000   |
| LRRC69   | 101         | 0         | 0.00%         | 196          | 0         | 0.00%         | 1.00 [0e+00-Inf]     | 1.000    | 1.000   |
| LRRC6    | 101         | 0         | 0.00%         | 196          | 0         | 0.00%         | 1.00 [0e+00-Inf]     | 1.000    | 1.000   |
| LRRC1    | 101         | 0         | 0.00%         | 196          | 0         | 0.00%         | 1.00 [0e+00-Inf]     | 1.000    | 1.000   |
| LRRN2    | 101         | 0         | 0.00%         | 196          | 0         | 0.00%         | 1.00 [0e+00-Inf]     | 1.000    | 1.000   |
| LRTOMT   | 101         | 0         | 0.00%         | 196          | 0         | 0.00%         | 1.00 [0e+00-Inf]     | 1.000    | 1.000   |
| LSG1     | 101         | 0         | 0.00%         | 196          | 0         | 0.00%         | 1.00 [0e+00-Inf]     | 1.000    | 1.000   |
| LSM14B   | 101         | 0         | 0.00%         | 196          | 0         | 0.00%         | 1.00 [0e+00-Inf]     | 1.000    | 1.000   |
| LSM1     | 101         | 0         | 0.00%         | 196          | 0         | 0.00%         | 1.00 [0e+00-Inf]     | 1.000    | 1.000   |
| LSM5     | 101         | 0         | 0.00%         | 196          | 0         | 0.00%         | 1.00 [0e+00-Inf]     | 1.000    | 1.000   |
| LUC7L3   | 101         | 0         | 0.00%         | 196          | 0         | 0.00%         | 1.00 [0e+00-Inf]     | 1.000    | 1.000   |
| LUC7L    | 101         | 0         | 0.00%         | 196          | 0         | 0.00%         | 1.00 [0e+00-Inf]     | 1.000    | 1.000   |
| LUM      | 101         | 0         | 0.00%         | 196          | 0         | 0.00%         | 1.00 [0e+00-Inf]     | 1.000    | 1.000   |
| LY6D     | 101         | 0         | 0.00%         | 196          | 0         | 0.00%         | 1.00 [0e+00-Inf]     | 1.000    | 1.000   |
| LY6E     | 101         | 0         | 0.00%         | 196          | 0         | 0.00%         | 1.00 [0e+00-Inf]     | 1.000    | 1.000   |
| LY6H     | 101         | 0         | 0.00%         | 196          | 0         | 0.00%         | 1.00 [0e+00-Inf]     | 1.000    | 1.000   |
| LY6K     | 101         | 0         | 0.00%         | 196          | 0         | 0.00%         | 1.00 [0e+00-Inf]     | 1.000    | 1.000   |
| LY96     | 101         | 0         | 0.00%         | 196          | 0         | 0.00%         | 1.00 [0e+00-Inf]     | 1.000    | 1.000   |
| LY9      | 101         | 0         | 0.00%         | 196          | 0         | 0.00%         | 1.00 [0e+00-Inf]     | 1.000    | 1.000   |
| LYNX1    | 101         | 0         | 0.00%         | 196          | 0         | 0.00%         | 1.00 [0e+00-Inf]     | 1.000    | 1.000   |
| LYN      | 101         | 0         | 0.00%         | 196          | 0         | 0.00%         | 1.00 [0e+00-Inf]     | 1.000    | 1.000   |
| LYPD2    | 101         | 0         | 0.00%         | 196          | 0         | 0.00%         | 1.00 [0e+00-Inf]     | 1.000    | 1.000   |
| LYPLA1   | 101         | 0         | 0.00%         | 196          | 0         | 0.00%         | 1.00 [0e+00-Inf]     | 1.000    | 1.000   |
| LYPLA11  | 101         | 0         | 0.00%         | 196          | 0         | 0.00%         | 1.00 [0e+00-Inf]     | 1.000    | 1.000   |
| LYRM1    | 101         | 0         | 0.00%         | 196          | 0         | 0.00%         | 1.00 [0e+00-Inf]     | 1.000    | 1.000   |
| LYSMD1   | 101         | 0         | 0.00%         | 196          | 0         | 0.00%         | 1.00 [0e+00-Inf]     | 1.000    | 1.000   |
| LYSMD4   | 101         | 0         | 0.00%         | 196          | 0         | 0.00%         | 1.00 [0e+00-Inf]     | 1.000    | 1.000   |
| LYST     | 101         | 0         | 0.00%         | 196          | 0         | 0.00%         | 1.00 [0e+00-Inf]     | 1.000    | 1.000   |
| LYZL6    | 101         | 0         | 0.00%         | 196          | 0         | 0.00%         | 1.00 [0e+00-Inf]     | 1.000    | 1.000   |
| LYZ      | 101         | 0         | 0.00%         | 196          | 0         | 0.00%         | 1.00 [0e+00-Inf]     | 1.000    | 1.000   |
| MAEL     | 101         | 0         | 0.00%         | 196          | 0         | 0.00%         | 1.00 [0e+00-Inf]     | 1.000    | 1.000   |
| MAF1     | 101         | 0         | 0.00%         | 196          | 0         | 0.00%         | 1.00 [0e+00-Inf]     | 1.000    | 1.000   |
| MAFA     | 101         | 0         | 0.00%         | 196          | 0         | 0.00%         | 1.00 [0e+00-Inf]     | 1.000    | 1.000   |
| MAFB     | 101         | 0         | 0.00%         | 196          | 0         | 0.00%         | 1.00 [0e+00-Inf]     | 1.000    | 1.000   |
| MAFG     | 101         | 0         | 0.00%         | 196          | 0         | 0.00%         | 1.00 [0e+00-Inf]     | 1.000    | 1.000   |
| MAGEF1   | 101         | 0         | 0.00%         | 196          | 0         | 0.00%         | 1.00 [0e+00-Inf]     | 1.000    | 1.000   |
| MAK16    | 101         | 0         | 0.00%         | 196          | 0         | 0.00%         | 1.00 [0e+00-Inf]     | 1.000    | 1.000   |
| MAL2     | 101         | 0         | 0.00%         | 196          | 0         | 0.00%         | 1.00 [0e+00-Inf]     | 1.000    | 1.000   |
| MALT1    | 101         | 0         | 0.00%         | 196          | 0         | 0.00%         | 1.00 [0e+00-Inf]     | 1.000    | 1.000   |
| MAN2A2   | 101         | 0         | 0.00%         | 196          | 0         | 0.00%         | 1.00 [0e+00-Inf]     | 1.000    | 1.000   |
| MANBAL   | 101         | 0         | 0.00%         | 196          | 0         | 0.00%         | 1.00 [0e+00-Inf]     | 1.000    | 1.000   |
| MAP1LC3A | 101         | 0         | 0.00%         | 196          | 0         | 0.00%         | 1.00 [0e+00-Inf]     | 1.000    | 1.000   |
| MAP1LC3C | 101         | 0         | 0.00%         | 196          | 0         | 0.00%         | 1.00 [0e+00-Inf]     | 1.000    | 1.000   |
| MAP2K4   | 101         | 1         | 0.99%         | 196          | 4         | 2.04%         | 2.08 [0.33-13.25]    | 0.514    | 1.000   |
| MAP2K6   | 101         | 0         | 0.00%         | 196          | 0         | 0.00%         | 1.00 [0e+00-Inf]     | 1.000    | 1.000   |
| MAP3K13  | 101         | 0         | 0.00%         | 196          | 0         | 0.00%         | 1.00 [0e+00-Inf]     | 1.000    | 1.000   |
| MAP3K3   | 101         | 0         | 0.00%         | 196          | 0         | 0.00%         | 1.00 [0e+00-Inf]     | 1.000    | 1.000   |
| MAP6D1   | 101         | 0         | 0.00%         | 196          | 0         | 0.00%         | 1.00 [0e+00-Inf]     | 1.000    | 1.000   |
| MAP6     | 101         | 0         | 0.00%         | 196          | 0         | 0.00%         | 1.00 [0e+00-Inf]     | 1.000    | 1.000   |
| MAPK15   | 101         | 0         | 0.00%         | 196          | 0         | 0.00%         | 1.00 [0e+00-Inf]     | 1.000    | 1.000   |
| MAPK3    | 101         | 0         | 0.00%         | 196          | 0         | 0.00%         | 1.00 [0e+00-Inf]     | 1.000    | 1.000   |
| MAPK7    | 101         | 0         | 0.00%         | 196          | 0         | 0.00%         | 1.00 [0e+00-Inf]     | 1.000    | 1.000   |
| MAPK8IP3 | 101         | 0         | 0.00%         | 196          | 0         | 0.00%         | 1.00 [0e+00-Inf]     | 1.000    | 1.000   |
| MAPKAPK2 | 101         | 0         | 0.00%         | 196          | 0         | 0.00%         | 1.00 [0e+00-Inf]     | 1.000    | 1.000   |

| Symbol   | CINSARC Low |           |               | CINSARC High |           |               | CINSARC High vs. Low |          |         |
|----------|-------------|-----------|---------------|--------------|-----------|---------------|----------------------|----------|---------|
|          | N tested    | N altered | Fq alteration | N tested     | N altered | Fq alteration | OR [95%CI]           | p-value* | q-value |
| MARCH10  | 101         | 0         | 0.00%         | 196          | 0         | 0.00%         | 1.00 [0e+00-Inf]     | 1.000    | 1.000   |
| MARCH9   | 101         | 0         | 0.00%         | 196          | 0         | 0.00%         | 1.00 [0e+00-Inf]     | 1.000    | 1.000   |
| MARK1    | 101         | 0         | 0.00%         | 196          | 0         | 0.00%         | 1.00 [0e+00-Inf]     | 1.000    | 1.000   |
| MATN2    | 101         | 0         | 0.00%         | 196          | 0         | 0.00%         | 1.00 [0e+00-Inf]     | 1.000    | 1.000   |
| MATN4    | 101         | 0         | 0.00%         | 196          | 0         | 0.00%         | 1.00 [0e+00-Inf]     | 1.000    | 1.000   |
| MAZ      | 101         | 0         | 0.00%         | 196          | 0         | 0.00%         | 1.00 [0e+00-Inf]     | 1.000    | 1.000   |
| MBIP     | 101         | 0         | 0.00%         | 196          | 0         | 0.00%         | 1.00 [0e+00-Inf]     | 1.000    | 1.000   |
| MBTD1    | 101         | 0         | 0.00%         | 196          | 0         | 0.00%         | 1.00 [0e+00-Inf]     | 1.000    | 1.000   |
| MC3R     | 101         | 0         | 0.00%         | 196          | 0         | 0.00%         | 1.00 [0e+00-Inf]     | 1.000    | 1.000   |
| MCCC1    | 101         | 0         | 0.00%         | 196          | 0         | 0.00%         | 1.00 [0e+00-Inf]     | 1.000    | 1.000   |
| MCF2L2   | 101         | 0         | 0.00%         | 196          | 0         | 0.00%         | 1.00 [0e+00-Inf]     | 1.000    | 1.000   |
| MCL1     | 101         | 0         | 0.00%         | 196          | 0         | 0.00%         | 1.00 [0e+00-Inf]     | 1.000    | 1.000   |
| MCM4     | 101         | 0         | 0.00%         | 196          | 0         | 0.00%         | 1.00 [0e+00-Inf]     | 1.000    | 1.000   |
| MCTP2    | 101         | 0         | 0.00%         | 196          | 0         | 0.00%         | 1.00 [0e+00-Inf]     | 1.000    | 1.000   |
| MDM1     | 101         | 0         | 0.00%         | 196          | 0         | 0.00%         | 1.00 [0e+00-Inf]     | 1.000    | 1.000   |
| MDM2     | 101         | 0         | 0.00%         | 196          | 0         | 0.00%         | 1.00 [0e+00-Inf]     | 1.000    | 1.000   |
| MDM4     | 101         | 0         | 0.00%         | 196          | 0         | 0.00%         | 1.00 [0e+00-Inf]     | 1.000    | 1.000   |
| MED13    | 101         | 0         | 0.00%         | 196          | 0         | 0.00%         | 1.00 [0e+00-Inf]     | 1.000    | 1.000   |
| MED1     | 101         | 0         | 0.00%         | 196          | 0         | 0.00%         | 1.00 [0e+00-Inf]     | 1.000    | 1.000   |
| MED24    | 101         | 0         | 0.00%         | 196          | 0         | 0.00%         | 1.00 [0e+00-Inf]     | 1.000    | 1.000   |
| MED30    | 101         | 0         | 0.00%         | 196          | 0         | 0.00%         | 1.00 [0e+00-Inf]     | 1.000    | 1.000   |
| MEF2A    | 101         | 0         | 0.00%         | 196          | 0         | 0.00%         | 1.00 [0e+00-Inf]     | 1.000    | 1.000   |
| MEF2D    | 101         | 0         | 0.00%         | 196          | 0         | 0.00%         | 1.00 [0e+00-Inf]     | 1.000    | 1.000   |
| MEFV     | 101         | 0         | 0.00%         | 196          | 0         | 0.00%         | 1.00 [0e+00-Inf]     | 1.000    | 1.000   |
| MESP1    | 101         | 0         | 0.00%         | 196          | 0         | 0.00%         | 1.00 [0e+00-Inf]     | 1.000    | 1.000   |
| MESP2    | 101         | 0         | 0.00%         | 196          | 0         | 0.00%         | 1.00 [0e+00-Inf]     | 1.000    | 1.000   |
| METRNL   | 101         | 0         | 0.00%         | 196          | 0         | 0.00%         | 1.00 [0e+00-Inf]     | 1.000    | 1.000   |
| METRN    | 101         | 0         | 0.00%         | 196          | 0         | 0.00%         | 1.00 [0e+00-Inf]     | 1.000    | 1.000   |
| METTL11B | 101         | 0         | 0.00%         | 196          | 0         | 0.00%         | 1.00 [0e+00-Inf]     | 1.000    | 1.000   |
| METTL1   | 101         | 0         | 0.00%         | 196          | 0         | 0.00%         | 1.00 [0e+00-Inf]     | 1.000    | 1.000   |
| METTL2A  | 101         | 0         | 0.00%         | 196          | 0         | 0.00%         | 1.00 [0e+00-Inf]     | 1.000    | 1.000   |
| METTL9   | 101         | 0         | 0.00%         | 196          | 0         | 0.00%         | 1.00 [0e+00-Inf]     | 1.000    | 1.000   |
| MEX3A    | 101         | 0         | 0.00%         | 196          | 0         | 0.00%         | 1.00 [0e+00-Inf]     | 1.000    | 1.000   |
| MFAP4    | 101         | 0         | 0.00%         | 196          | 0         | 0.00%         | 1.00 [0e+00-Inf]     | 1.000    | 1.000   |
| MFG8     | 101         | 0         | 0.00%         | 196          | 0         | 0.00%         | 1.00 [0e+00-Inf]     | 1.000    | 1.000   |
| MFN1     | 101         | 0         | 0.00%         | 196          | 0         | 0.00%         | 1.00 [0e+00-Inf]     | 1.000    | 1.000   |
| MFSD11   | 101         | 0         | 0.00%         | 196          | 0         | 0.00%         | 1.00 [0e+00-Inf]     | 1.000    | 1.000   |
| MFSD3    | 101         | 0         | 0.00%         | 196          | 0         | 0.00%         | 1.00 [0e+00-Inf]     | 1.000    | 1.000   |
| MGAT5B   | 101         | 0         | 0.00%         | 196          | 0         | 0.00%         | 1.00 [0e+00-Inf]     | 1.000    | 1.000   |
| MGC16275 | 101         | 0         | 0.00%         | 196          | 0         | 0.00%         | 1.00 [0e+00-Inf]     | 1.000    | 1.000   |
| MGC2889  | 101         | 0         | 0.00%         | 196          | 0         | 0.00%         | 1.00 [0e+00-Inf]     | 1.000    | 1.000   |
| MGRN1    | 101         | 0         | 0.00%         | 196          | 0         | 0.00%         | 1.00 [0e+00-Inf]     | 1.000    | 1.000   |
| MGST3    | 101         | 0         | 0.00%         | 196          | 0         | 0.00%         | 1.00 [0e+00-Inf]     | 1.000    | 1.000   |
| MIA3     | 101         | 0         | 0.00%         | 196          | 0         | 0.00%         | 1.00 [0e+00-Inf]     | 1.000    | 1.000   |
| MIF4GD   | 101         | 0         | 0.00%         | 196          | 0         | 0.00%         | 1.00 [0e+00-Inf]     | 1.000    | 1.000   |
| MIPOL1   | 101         | 0         | 0.00%         | 196          | 0         | 0.00%         | 1.00 [0e+00-Inf]     | 1.000    | 1.000   |
| MIXL1    | 101         | 0         | 0.00%         | 196          | 0         | 0.00%         | 1.00 [0e+00-Inf]     | 1.000    | 1.000   |
| MKRN1    | 101         | 0         | 0.00%         | 196          | 0         | 0.00%         | 1.00 [0e+00-Inf]     | 1.000    | 1.000   |
| MKS1     | 101         | 0         | 0.00%         | 196          | 0         | 0.00%         | 1.00 [0e+00-Inf]     | 1.000    | 1.000   |
| MLLT11   | 101         | 0         | 0.00%         | 196          | 0         | 0.00%         | 1.00 [0e+00-Inf]     | 1.000    | 1.000   |
| MLLT6    | 101         | 0         | 0.00%         | 196          | 0         | 0.00%         | 1.00 [0e+00-Inf]     | 1.000    | 1.000   |
| MLST8    | 101         | 0         | 0.00%         | 196          | 0         | 0.00%         | 1.00 [0e+00-Inf]     | 1.000    | 1.000   |
| MMD      | 101         | 0         | 0.00%         | 196          | 0         | 0.00%         | 1.00 [0e+00-Inf]     | 1.000    | 1.000   |
| MMP16    | 101         | 0         | 0.00%         | 196          | 0         | 0.00%         | 1.00 [0e+00-Inf]     | 1.000    | 1.000   |
| MMP24    | 101         | 0         | 0.00%         | 196          | 0         | 0.00%         | 1.00 [0e+00-Inf]     | 1.000    | 1.000   |
| MMP25    | 101         | 0         | 0.00%         | 196          | 0         | 0.00%         | 1.00 [0e+00-Inf]     | 1.000    | 1.000   |
| MMP28    | 101         | 0         | 0.00%         | 196          | 0         | 0.00%         | 1.00 [0e+00-Inf]     | 1.000    | 1.000   |
| MMP9     | 101         | 0         | 0.00%         | 196          | 0         | 0.00%         | 1.00 [0e+00-Inf]     | 1.000    | 1.000   |
| MNDA     | 101         | 0         | 0.00%         | 196          | 0         | 0.00%         | 1.00 [0e+00-Inf]     | 1.000    | 1.000   |
| MOCS3    | 101         | 0         | 0.00%         | 196          | 0         | 0.00%         | 1.00 [0e+00-Inf]     | 1.000    | 1.000   |
| MOGAT2   | 101         | 0         | 0.00%         | 196          | 0         | 0.00%         | 1.00 [0e+00-Inf]     | 1.000    | 1.000   |
| MON2     | 101         | 0         | 0.00%         | 196          | 0         | 0.00%         | 1.00 [0e+00-Inf]     | 1.000    | 1.000   |
| MARC1    | 101         | 0         | 0.00%         | 196          | 0         | 0.00%         | 1.00 [0e+00-Inf]     | 1.000    | 1.000   |
| MARC2    | 101         | 0         | 0.00%         | 196          | 0         | 0.00%         | 1.00 [0e+00-Inf]     | 1.000    | 1.000   |
| MOS      | 101         | 0         | 0.00%         | 196          | 0         | 0.00%         | 1.00 [0e+00-Inf]     | 1.000    | 1.000   |
| MPG      | 101         | 0         | 0.00%         | 196          | 0         | 0.00%         | 1.00 [0e+00-Inf]     | 1.000    | 1.000   |
| MPO      | 101         | 0         | 0.00%         | 196          | 0         | 0.00%         | 1.00 [0e+00-Inf]     | 1.000    | 1.000   |
| MPP6     | 101         | 0         | 0.00%         | 196          | 0         | 0.00%         | 1.00 [0e+00-Inf]     | 1.000    | 1.000   |
| MPV17L   | 101         | 0         | 0.00%         | 196          | 0         | 0.00%         | 1.00 [0e+00-Inf]     | 1.000    | 1.000   |
| MPZL1    | 101         | 0         | 0.00%         | 196          | 0         | 0.00%         | 1.00 [0e+00-Inf]     | 1.000    | 1.000   |
| MPZ      | 101         | 0         | 0.00%         | 196          | 0         | 0.00%         | 1.00 [0e+00-Inf]     | 1.000    | 1.000   |

| Symbol  | CINSARC Low |           |               | CINSARC High |           |               | CINSARC High vs. Low |          |         |
|---------|-------------|-----------|---------------|--------------|-----------|---------------|----------------------|----------|---------|
|         | N tested    | N altered | Fq alteration | N tested     | N altered | Fq alteration | OR [95%CI]           | p-value* | q-value |
| MR1     | 101         | 0         | 0.00%         | 196          | 0         | 0.00%         | 1.00 [0e+00-Inf]     | 1.000    | 1.000   |
| MRC2    | 101         | 0         | 0.00%         | 196          | 0         | 0.00%         | 1.00 [0e+00-Inf]     | 1.000    | 1.000   |
| MRGPRD  | 101         | 0         | 0.00%         | 196          | 0         | 0.00%         | 1.00 [0e+00-Inf]     | 1.000    | 1.000   |
| MRGPRF  | 101         | 0         | 0.00%         | 196          | 0         | 0.00%         | 1.00 [0e+00-Inf]     | 1.000    | 1.000   |
| MRGPRX1 | 101         | 1         | 0.99%         | 196          | 1         | 0.51%         | 0.51 [0.05-5.30]     | 0.638    | 1.000   |
| MRM1    | 101         | 0         | 0.00%         | 196          | 0         | 0.00%         | 1.00 [0e+00-Inf]     | 1.000    | 1.000   |
| MRPL10  | 101         | 0         | 0.00%         | 196          | 0         | 0.00%         | 1.00 [0e+00-Inf]     | 1.000    | 1.000   |
| MRPL11  | 101         | 0         | 0.00%         | 196          | 0         | 0.00%         | 1.00 [0e+00-Inf]     | 1.000    | 1.000   |
| MRPL12  | 101         | 0         | 0.00%         | 196          | 0         | 0.00%         | 1.00 [0e+00-Inf]     | 1.000    | 1.000   |
| MRPL13  | 101         | 0         | 0.00%         | 196          | 0         | 0.00%         | 1.00 [0e+00-Inf]     | 1.000    | 1.000   |
| MRPL15  | 101         | 0         | 0.00%         | 196          | 0         | 0.00%         | 1.00 [0e+00-Inf]     | 1.000    | 1.000   |
| MRPL21  | 101         | 0         | 0.00%         | 196          | 0         | 0.00%         | 1.00 [0e+00-Inf]     | 1.000    | 1.000   |
| MRPL24  | 101         | 0         | 0.00%         | 196          | 0         | 0.00%         | 1.00 [0e+00-Inf]     | 1.000    | 1.000   |
| MRPL27  | 101         | 0         | 0.00%         | 196          | 0         | 0.00%         | 1.00 [0e+00-Inf]     | 1.000    | 1.000   |
| MRPL28  | 101         | 0         | 0.00%         | 196          | 0         | 0.00%         | 1.00 [0e+00-Inf]     | 1.000    | 1.000   |
| MRPL38  | 101         | 0         | 0.00%         | 196          | 0         | 0.00%         | 1.00 [0e+00-Inf]     | 1.000    | 1.000   |
| MRPL45  | 101         | 0         | 0.00%         | 196          | 0         | 0.00%         | 1.00 [0e+00-Inf]     | 1.000    | 1.000   |
| MRPL46  | 101         | 0         | 0.00%         | 196          | 0         | 0.00%         | 1.00 [0e+00-Inf]     | 1.000    | 1.000   |
| MRPL47  | 101         | 0         | 0.00%         | 196          | 0         | 0.00%         | 1.00 [0e+00-Inf]     | 1.000    | 1.000   |
| MRPL48  | 101         | 0         | 0.00%         | 196          | 0         | 0.00%         | 1.00 [0e+00-Inf]     | 1.000    | 1.000   |
| MRPL55  | 101         | 0         | 0.00%         | 196          | 0         | 0.00%         | 1.00 [0e+00-Inf]     | 1.000    | 1.000   |
| MRPL9   | 101         | 0         | 0.00%         | 196          | 0         | 0.00%         | 1.00 [0e+00-Inf]     | 1.000    | 1.000   |
| MRPS11  | 101         | 0         | 0.00%         | 196          | 0         | 0.00%         | 1.00 [0e+00-Inf]     | 1.000    | 1.000   |
| MRPS14  | 101         | 0         | 0.00%         | 196          | 0         | 0.00%         | 1.00 [0e+00-Inf]     | 1.000    | 1.000   |
| MRPS16  | 101         | 0         | 0.00%         | 196          | 0         | 0.00%         | 1.00 [0e+00-Inf]     | 1.000    | 1.000   |
| MRPS21  | 101         | 0         | 0.00%         | 196          | 0         | 0.00%         | 1.00 [0e+00-Inf]     | 1.000    | 1.000   |
| MRPS23  | 101         | 0         | 0.00%         | 196          | 0         | 0.00%         | 1.00 [0e+00-Inf]     | 1.000    | 1.000   |
| MRPS28  | 101         | 0         | 0.00%         | 196          | 0         | 0.00%         | 1.00 [0e+00-Inf]     | 1.000    | 1.000   |
| MRPS34  | 101         | 0         | 0.00%         | 196          | 0         | 0.00%         | 1.00 [0e+00-Inf]     | 1.000    | 1.000   |
| MRPS7   | 101         | 0         | 0.00%         | 196          | 0         | 0.00%         | 1.00 [0e+00-Inf]     | 1.000    | 1.000   |
| MRS2P2  | 101         | 0         | 0.00%         | 196          | 0         | 0.00%         | 1.00 [0e+00-Inf]     | 1.000    | 1.000   |
| MSC     | 101         | 0         | 0.00%         | 196          | 0         | 0.00%         | 1.00 [0e+00-Inf]     | 1.000    | 1.000   |
| MSI2    | 101         | 0         | 0.00%         | 196          | 0         | 0.00%         | 1.00 [0e+00-Inf]     | 1.000    | 1.000   |
| MSL1    | 101         | 0         | 0.00%         | 196          | 0         | 0.00%         | 1.00 [0e+00-Inf]     | 1.000    | 1.000   |
| MSLN    | 101         | 0         | 0.00%         | 196          | 0         | 0.00%         | 1.00 [0e+00-Inf]     | 1.000    | 1.000   |
| MSRB3   | 101         | 0         | 0.00%         | 196          | 0         | 0.00%         | 1.00 [0e+00-Inf]     | 1.000    | 1.000   |
| MSTO1   | 101         | 0         | 0.00%         | 196          | 0         | 0.00%         | 1.00 [0e+00-Inf]     | 1.000    | 1.000   |
| MSTO2P  | 101         | 0         | 0.00%         | 196          | 0         | 0.00%         | 1.00 [0e+00-Inf]     | 1.000    | 1.000   |
| MSX2P1  | 101         | 0         | 0.00%         | 196          | 0         | 0.00%         | 1.00 [0e+00-Inf]     | 1.000    | 1.000   |
| MTBP    | 101         | 0         | 0.00%         | 196          | 0         | 0.00%         | 1.00 [0e+00-Inf]     | 1.000    | 1.000   |
| MTDH    | 101         | 0         | 0.00%         | 196          | 0         | 0.00%         | 1.00 [0e+00-Inf]     | 1.000    | 1.000   |
| MTFR1   | 101         | 0         | 0.00%         | 196          | 0         | 0.00%         | 1.00 [0e+00-Inf]     | 1.000    | 1.000   |
| MTHFD2L | 101         | 0         | 0.00%         | 196          | 0         | 0.00%         | 1.00 [0e+00-Inf]     | 1.000    | 1.000   |
| MTMR11  | 101         | 0         | 0.00%         | 196          | 0         | 0.00%         | 1.00 [0e+00-Inf]     | 1.000    | 1.000   |
| MTMR4   | 101         | 0         | 0.00%         | 196          | 0         | 0.00%         | 1.00 [0e+00-Inf]     | 1.000    | 1.000   |
| MTR     | 101         | 0         | 0.00%         | 196          | 0         | 0.00%         | 1.00 [0e+00-Inf]     | 1.000    | 1.000   |
| MTSS1   | 101         | 0         | 0.00%         | 196          | 0         | 0.00%         | 1.00 [0e+00-Inf]     | 1.000    | 1.000   |
| MTVR2   | 101         | 0         | 0.00%         | 196          | 0         | 0.00%         | 1.00 [0e+00-Inf]     | 1.000    | 1.000   |
| MTX1    | 101         | 0         | 0.00%         | 196          | 0         | 0.00%         | 1.00 [0e+00-Inf]     | 1.000    | 1.000   |
| MUC1    | 101         | 0         | 0.00%         | 196          | 0         | 0.00%         | 1.00 [0e+00-Inf]     | 1.000    | 1.000   |
| MUC20   | 101         | 0         | 0.00%         | 196          | 0         | 0.00%         | 1.00 [0e+00-Inf]     | 1.000    | 1.000   |
| MUC4    | 101         | 0         | 0.00%         | 196          | 0         | 0.00%         | 1.00 [0e+00-Inf]     | 1.000    | 1.000   |
| MVP     | 101         | 0         | 0.00%         | 196          | 0         | 0.00%         | 1.00 [0e+00-Inf]     | 1.000    | 1.000   |
| MXRA7   | 101         | 0         | 0.00%         | 196          | 0         | 0.00%         | 1.00 [0e+00-Inf]     | 1.000    | 1.000   |
| MYADML2 | 101         | 0         | 0.00%         | 196          | 0         | 0.00%         | 1.00 [0e+00-Inf]     | 1.000    | 1.000   |
| MYBL1   | 101         | 0         | 0.00%         | 196          | 0         | 0.00%         | 1.00 [0e+00-Inf]     | 1.000    | 1.000   |
| MYBL2   | 101         | 0         | 0.00%         | 196          | 0         | 0.00%         | 1.00 [0e+00-Inf]     | 1.000    | 1.000   |
| MYBPH   | 101         | 0         | 0.00%         | 196          | 0         | 0.00%         | 1.00 [0e+00-Inf]     | 1.000    | 1.000   |
| MYCBPAP | 101         | 0         | 0.00%         | 196          | 0         | 0.00%         | 1.00 [0e+00-Inf]     | 1.000    | 1.000   |
| MYC     | 101         | 0         | 0.00%         | 196          | 0         | 0.00%         | 1.00 [0e+00-Inf]     | 1.000    | 1.000   |
| MYEOV   | 101         | 0         | 0.00%         | 196          | 0         | 0.00%         | 1.00 [0e+00-Inf]     | 1.000    | 1.000   |
| MYF5    | 101         | 0         | 0.00%         | 196          | 0         | 0.00%         | 1.00 [0e+00-Inf]     | 1.000    | 1.000   |
| MYF6    | 101         | 0         | 0.00%         | 196          | 0         | 0.00%         | 1.00 [0e+00-Inf]     | 1.000    | 1.000   |
| MYH11   | 101         | 0         | 0.00%         | 196          | 0         | 0.00%         | 1.00 [0e+00-Inf]     | 1.000    | 1.000   |
| MYH7B   | 101         | 0         | 0.00%         | 196          | 0         | 0.00%         | 1.00 [0e+00-Inf]     | 1.000    | 1.000   |
| MYL4    | 101         | 0         | 0.00%         | 196          | 0         | 0.00%         | 1.00 [0e+00-Inf]     | 1.000    | 1.000   |
| MYL9    | 101         | 0         | 0.00%         | 196          | 0         | 0.00%         | 1.00 [0e+00-Inf]     | 1.000    | 1.000   |
| MYLPF   | 101         | 0         | 0.00%         | 196          | 0         | 0.00%         | 1.00 [0e+00-Inf]     | 1.000    | 1.000   |
| MYO15B  | 101         | 0         | 0.00%         | 196          | 0         | 0.00%         | 1.00 [0e+00-Inf]     | 1.000    | 1.000   |
| MYO16   | 101         | 0         | 0.00%         | 196          | 0         | 0.00%         | 1.00 [0e+00-Inf]     | 1.000    | 1.000   |
| MYO18A  | 101         | 0         | 0.00%         | 196          | 0         | 0.00%         | 1.00 [0e+00-Inf]     | 1.000    | 1.000   |

| Symbol     | CINSARC Low |           |               | CINSARC High |           |               | CINSARC High vs. Low |          |         |
|------------|-------------|-----------|---------------|--------------|-----------|---------------|----------------------|----------|---------|
|            | N tested    | N altered | Fq alteration | N tested     | N altered | Fq alteration | OR [95%CI]           | p-value* | q-value |
| MYO19      | 101         | 0         | 0.00%         | 196          | 0         | 0.00%         | 1.00 [0e+00-Inf]     | 1.000    | 1.000   |
| MYO1D      | 101         | 0         | 0.00%         | 196          | 0         | 0.00%         | 1.00 [0e+00-Inf]     | 1.000    | 1.000   |
| MYO7A      | 101         | 0         | 0.00%         | 196          | 0         | 0.00%         | 1.00 [0e+00-Inf]     | 1.000    | 1.000   |
| MYOC       | 101         | 0         | 0.00%         | 196          | 0         | 0.00%         | 1.00 [0e+00-Inf]     | 1.000    | 1.000   |
| MYOD1      | 101         | 0         | 0.00%         | 196          | 0         | 0.00%         | 1.00 [0e+00-Inf]     | 1.000    | 1.000   |
| MYOG       | 101         | 0         | 0.00%         | 196          | 0         | 0.00%         | 1.00 [0e+00-Inf]     | 1.000    | 1.000   |
| MYOZ1      | 101         | 0         | 0.00%         | 196          | 0         | 0.00%         | 1.00 [0e+00-Inf]     | 1.000    | 1.000   |
| KAT8       | 101         | 0         | 0.00%         | 196          | 0         | 0.00%         | 1.00 [0e+00-Inf]     | 1.000    | 1.000   |
| KAT7       | 101         | 0         | 0.00%         | 196          | 0         | 0.00%         | 1.00 [0e+00-Inf]     | 1.000    | 1.000   |
| KAT6A      | 101         | 0         | 0.00%         | 196          | 0         | 0.00%         | 1.00 [0e+00-Inf]     | 1.000    | 1.000   |
| KAT6B      | 101         | 0         | 0.00%         | 196          | 0         | 0.00%         | 1.00 [0e+00-Inf]     | 1.000    | 1.000   |
| MYT1       | 101         | 0         | 0.00%         | 196          | 0         | 0.00%         | 1.00 [0e+00-Inf]     | 1.000    | 1.000   |
| NAAA       | 101         | 0         | 0.00%         | 196          | 0         | 0.00%         | 1.00 [0e+00-Inf]     | 1.000    | 1.000   |
| NAALAD2    | 101         | 0         | 0.00%         | 196          | 0         | 0.00%         | 1.00 [0e+00-Inf]     | 1.000    | 1.000   |
| NACA2      | 101         | 0         | 0.00%         | 196          | 0         | 0.00%         | 1.00 [0e+00-Inf]     | 1.000    | 1.000   |
| NADSYN1    | 101         | 0         | 0.00%         | 196          | 0         | 0.00%         | 1.00 [0e+00-Inf]     | 1.000    | 1.000   |
| NAGPA      | 101         | 0         | 0.00%         | 196          | 0         | 0.00%         | 1.00 [0e+00-Inf]     | 1.000    | 1.000   |
| NAIP       | 101         | 0         | 0.00%         | 196          | 0         | 0.00%         | 1.00 [0e+00-Inf]     | 1.000    | 1.000   |
| NAP1L1     | 101         | 0         | 0.00%         | 196          | 0         | 0.00%         | 1.00 [0e+00-Inf]     | 1.000    | 1.000   |
| NARF       | 101         | 0         | 0.00%         | 196          | 0         | 0.00%         | 1.00 [0e+00-Inf]     | 1.000    | 1.000   |
| NARS2      | 101         | 0         | 0.00%         | 196          | 0         | 0.00%         | 1.00 [0e+00-Inf]     | 1.000    | 1.000   |
| NAT14      | 101         | 0         | 0.00%         | 196          | 0         | 0.00%         | 1.00 [0e+00-Inf]     | 1.000    | 1.000   |
| NAA60      | 101         | 0         | 0.00%         | 196          | 0         | 0.00%         | 1.00 [0e+00-Inf]     | 1.000    | 1.000   |
| NAT9       | 101         | 0         | 0.00%         | 196          | 0         | 0.00%         | 1.00 [0e+00-Inf]     | 1.000    | 1.000   |
| NAV1       | 101         | 0         | 0.00%         | 196          | 0         | 0.00%         | 1.00 [0e+00-Inf]     | 1.000    | 1.000   |
| NAV3       | 101         | 0         | 0.00%         | 196          | 0         | 0.00%         | 1.00 [0e+00-Inf]     | 1.000    | 1.000   |
| NBN        | 101         | 0         | 0.00%         | 196          | 0         | 0.00%         | 1.00 [0e+00-Inf]     | 1.000    | 1.000   |
| NBPF10     | 101         | 0         | 0.00%         | 196          | 0         | 0.00%         | 1.00 [0e+00-Inf]     | 1.000    | 1.000   |
| NBPF14     | 101         | 0         | 0.00%         | 196          | 0         | 0.00%         | 1.00 [0e+00-Inf]     | 1.000    | 1.000   |
| NBPF15     | 101         | 0         | 0.00%         | 196          | 0         | 0.00%         | 1.00 [0e+00-Inf]     | 1.000    | 1.000   |
| NBPF7      | 101         | 0         | 0.00%         | 196          | 0         | 0.00%         | 1.00 [0e+00-Inf]     | 1.000    | 1.000   |
| NBPF9      | 101         | 0         | 0.00%         | 196          | 0         | 0.00%         | 1.00 [0e+00-Inf]     | 1.000    | 1.000   |
| NCALD      | 101         | 0         | 0.00%         | 196          | 0         | 0.00%         | 1.00 [0e+00-Inf]     | 1.000    | 1.000   |
| NCBP2      | 101         | 0         | 0.00%         | 196          | 0         | 0.00%         | 1.00 [0e+00-Inf]     | 1.000    | 1.000   |
| NCF2       | 101         | 0         | 0.00%         | 196          | 0         | 0.00%         | 1.00 [0e+00-Inf]     | 1.000    | 1.000   |
| NCOA2      | 101         | 0         | 0.00%         | 196          | 0         | 0.00%         | 1.00 [0e+00-Inf]     | 1.000    | 1.000   |
| NCOA3      | 101         | 0         | 0.00%         | 196          | 0         | 0.00%         | 1.00 [0e+00-Inf]     | 1.000    | 1.000   |
| NCOA5      | 101         | 0         | 0.00%         | 196          | 0         | 0.00%         | 1.00 [0e+00-Inf]     | 1.000    | 1.000   |
| NCOA6      | 101         | 0         | 0.00%         | 196          | 0         | 0.00%         | 1.00 [0e+00-Inf]     | 1.000    | 1.000   |
| LINC00029  | 101         | 0         | 0.00%         | 196          | 0         | 0.00%         | 1.00 [0e+00-Inf]     | 1.000    | 1.000   |
| LINC00051  | 101         | 0         | 0.00%         | 196          | 0         | 0.00%         | 1.00 [0e+00-Inf]     | 1.000    | 1.000   |
| LINC00052  | 101         | 0         | 0.00%         | 196          | 0         | 0.00%         | 1.00 [0e+00-Inf]     | 1.000    | 1.000   |
| FBXL19-AS1 | 101         | 0         | 0.00%         | 196          | 0         | 0.00%         | 1.00 [0e+00-Inf]     | 1.000    | 1.000   |
| LINC00685  | 101         | 0         | 0.00%         | 196          | 0         | 0.00%         | 1.00 [0e+00-Inf]     | 1.000    | 1.000   |
| CRYM-AS1   | 101         | 0         | 0.00%         | 196          | 0         | 0.00%         | 1.00 [0e+00-Inf]     | 1.000    | 1.000   |
| TTY14      | 101         | 64        | 63.37%        | 196          | 116       | 59.18%        | 0.84 [0.55-1.27]     | 0.485    | 1.000   |
| FAM224B    | 101         | 65        | 64.36%        | 196          | 117       | 59.69%        | 0.82 [0.54-1.25]     | 0.435    | 1.000   |
| LINC00235  | 101         | 0         | 0.00%         | 196          | 0         | 0.00%         | 1.00 [0e+00-Inf]     | 1.000    | 1.000   |
| NCSTN      | 101         | 0         | 0.00%         | 196          | 0         | 0.00%         | 1.00 [0e+00-Inf]     | 1.000    | 1.000   |
| NDE1       | 101         | 0         | 0.00%         | 196          | 0         | 0.00%         | 1.00 [0e+00-Inf]     | 1.000    | 1.000   |
| NDRG1      | 101         | 0         | 0.00%         | 196          | 0         | 0.00%         | 1.00 [0e+00-Inf]     | 1.000    | 1.000   |
| NDRG3      | 101         | 0         | 0.00%         | 196          | 0         | 0.00%         | 1.00 [0e+00-Inf]     | 1.000    | 1.000   |
| NDST2      | 101         | 0         | 0.00%         | 196          | 0         | 0.00%         | 1.00 [0e+00-Inf]     | 1.000    | 1.000   |
| NDUFAB1    | 101         | 0         | 0.00%         | 196          | 0         | 0.00%         | 1.00 [0e+00-Inf]     | 1.000    | 1.000   |
| NDUFB10    | 101         | 0         | 0.00%         | 196          | 0         | 0.00%         | 1.00 [0e+00-Inf]     | 1.000    | 1.000   |
| NDUFB2     | 101         | 0         | 0.00%         | 196          | 0         | 0.00%         | 1.00 [0e+00-Inf]     | 1.000    | 1.000   |
| NDUFB5     | 101         | 0         | 0.00%         | 196          | 0         | 0.00%         | 1.00 [0e+00-Inf]     | 1.000    | 1.000   |
| NDUFB9     | 101         | 0         | 0.00%         | 196          | 0         | 0.00%         | 1.00 [0e+00-Inf]     | 1.000    | 1.000   |
| NDUFC2     | 101         | 0         | 0.00%         | 196          | 0         | 0.00%         | 1.00 [0e+00-Inf]     | 1.000    | 1.000   |
| NDUFS2     | 101         | 0         | 0.00%         | 196          | 0         | 0.00%         | 1.00 [0e+00-Inf]     | 1.000    | 1.000   |
| NDUFS8     | 101         | 0         | 0.00%         | 196          | 0         | 0.00%         | 1.00 [0e+00-Inf]     | 1.000    | 1.000   |
| NDUFV1     | 101         | 0         | 0.00%         | 196          | 0         | 0.00%         | 1.00 [0e+00-Inf]     | 1.000    | 1.000   |
| NECAB1     | 101         | 0         | 0.00%         | 196          | 0         | 0.00%         | 1.00 [0e+00-Inf]     | 1.000    | 1.000   |
| NEK2       | 101         | 0         | 0.00%         | 196          | 0         | 0.00%         | 1.00 [0e+00-Inf]     | 1.000    | 1.000   |
| NEK7       | 101         | 0         | 0.00%         | 196          | 0         | 0.00%         | 1.00 [0e+00-Inf]     | 1.000    | 1.000   |
| NEK8       | 101         | 0         | 0.00%         | 196          | 0         | 0.00%         | 1.00 [0e+00-Inf]     | 1.000    | 1.000   |
| NENF       | 101         | 0         | 0.00%         | 196          | 0         | 0.00%         | 1.00 [0e+00-Inf]     | 1.000    | 1.000   |
| NES        | 101         | 0         | 0.00%         | 196          | 0         | 0.00%         | 1.00 [0e+00-Inf]     | 1.000    | 1.000   |
| NEU3       | 101         | 0         | 0.00%         | 196          | 0         | 0.00%         | 1.00 [0e+00-Inf]     | 1.000    | 1.000   |
| NEURL2     | 101         | 0         | 0.00%         | 196          | 0         | 0.00%         | 1.00 [0e+00-Inf]     | 1.000    | 1.000   |
| NEUROD2    | 101         | 0         | 0.00%         | 196          | 0         | 0.00%         | 1.00 [0e+00-Inf]     | 1.000    | 1.000   |

| Symbol    | CINSARC Low |           |               | CINSARC High |           |               | CINSARC High vs. Low |          |         |
|-----------|-------------|-----------|---------------|--------------|-----------|---------------|----------------------|----------|---------|
|           | N tested    | N altered | Fq alteration | N tested     | N altered | Fq alteration | OR [95%CI]           | p-value* | q-value |
| NEUROD6   | 101         | 0         | 0.00%         | 196          | 0         | 0.00%         | 1.00 [0e+00-Inf]     | 1.000    | 1.000   |
| NF1       | 101         | 0         | 0.00%         | 196          | 0         | 0.00%         | 1.00 [0e+00-Inf]     | 1.000    | 1.000   |
| NFASC     | 101         | 0         | 0.00%         | 196          | 0         | 0.00%         | 1.00 [0e+00-Inf]     | 1.000    | 1.000   |
| NFATC2IP  | 101         | 0         | 0.00%         | 196          | 0         | 0.00%         | 1.00 [0e+00-Inf]     | 1.000    | 1.000   |
| NFATC2    | 101         | 0         | 0.00%         | 196          | 0         | 0.00%         | 1.00 [0e+00-Inf]     | 1.000    | 1.000   |
| NFE2L1    | 101         | 0         | 0.00%         | 196          | 0         | 0.00%         | 1.00 [0e+00-Inf]     | 1.000    | 1.000   |
| NFE2L3    | 101         | 0         | 0.00%         | 196          | 0         | 0.00%         | 1.00 [0e+00-Inf]     | 1.000    | 1.000   |
| NFKBIA    | 101         | 0         | 0.00%         | 196          | 0         | 0.00%         | 1.00 [0e+00-Inf]     | 1.000    | 1.000   |
| TONSL     | 101         | 1         | 0.99%         | 196          | 0         | 0.00%         | 1.6e-08 [0e+00-Inf]  | 0.996    | 1.000   |
| NFS1      | 101         | 0         | 0.00%         | 196          | 0         | 0.00%         | 1.00 [0e+00-Inf]     | 1.000    | 1.000   |
| NGFR      | 101         | 0         | 0.00%         | 196          | 0         | 0.00%         | 1.00 [0e+00-Inf]     | 1.000    | 1.000   |
| NGRN      | 101         | 0         | 0.00%         | 196          | 0         | 0.00%         | 1.00 [0e+00-Inf]     | 1.000    | 1.000   |
| NHLH1     | 101         | 0         | 0.00%         | 196          | 0         | 0.00%         | 1.00 [0e+00-Inf]     | 1.000    | 1.000   |
| NHLRC4    | 101         | 0         | 0.00%         | 196          | 0         | 0.00%         | 1.00 [0e+00-Inf]     | 1.000    | 1.000   |
| NID1      | 101         | 0         | 0.00%         | 196          | 0         | 0.00%         | 1.00 [0e+00-Inf]     | 1.000    | 1.000   |
| NIPAL2    | 101         | 0         | 0.00%         | 196          | 0         | 0.00%         | 1.00 [0e+00-Inf]     | 1.000    | 1.000   |
| NIT1      | 101         | 0         | 0.00%         | 196          | 0         | 0.00%         | 1.00 [0e+00-Inf]     | 1.000    | 1.000   |
| NKAIN3    | 101         | 0         | 0.00%         | 196          | 0         | 0.00%         | 1.00 [0e+00-Inf]     | 1.000    | 1.000   |
| NKAIN4    | 101         | 0         | 0.00%         | 196          | 0         | 0.00%         | 1.00 [0e+00-Inf]     | 1.000    | 1.000   |
| NKX2-1    | 101         | 0         | 0.00%         | 196          | 0         | 0.00%         | 1.00 [0e+00-Inf]     | 1.000    | 1.000   |
| NKX2-5    | 101         | 0         | 0.00%         | 196          | 0         | 0.00%         | 1.00 [0e+00-Inf]     | 1.000    | 1.000   |
| NKX2-8    | 101         | 0         | 0.00%         | 196          | 0         | 0.00%         | 1.00 [0e+00-Inf]     | 1.000    | 1.000   |
| NKX6-3    | 101         | 0         | 0.00%         | 196          | 0         | 0.00%         | 1.00 [0e+00-Inf]     | 1.000    | 1.000   |
| NLE1      | 101         | 0         | 0.00%         | 196          | 0         | 0.00%         | 1.00 [0e+00-Inf]     | 1.000    | 1.000   |
| NLGN1     | 101         | 0         | 0.00%         | 196          | 0         | 0.00%         | 1.00 [0e+00-Inf]     | 1.000    | 1.000   |
| NLGN4Y    | 101         | 64        | 63.37%        | 196          | 115       | 58.67%        | 0.82 [0.54-1.24]     | 0.434    | 1.000   |
| NLK       | 101         | 0         | 0.00%         | 196          | 0         | 0.00%         | 1.00 [0e+00-Inf]     | 1.000    | 1.000   |
| NLR3      | 101         | 0         | 0.00%         | 196          | 0         | 0.00%         | 1.00 [0e+00-Inf]     | 1.000    | 1.000   |
| NLRP11    | 101         | 0         | 0.00%         | 196          | 0         | 0.00%         | 1.00 [0e+00-Inf]     | 1.000    | 1.000   |
| NLRP13    | 101         | 0         | 0.00%         | 196          | 0         | 0.00%         | 1.00 [0e+00-Inf]     | 1.000    | 1.000   |
| NLRP3     | 101         | 0         | 0.00%         | 196          | 0         | 0.00%         | 1.00 [0e+00-Inf]     | 1.000    | 1.000   |
| NLRP4     | 101         | 0         | 0.00%         | 196          | 0         | 0.00%         | 1.00 [0e+00-Inf]     | 1.000    | 1.000   |
| NLRP8     | 101         | 0         | 0.00%         | 196          | 0         | 0.00%         | 1.00 [0e+00-Inf]     | 1.000    | 1.000   |
| NLRP9     | 101         | 0         | 0.00%         | 196          | 0         | 0.00%         | 1.00 [0e+00-Inf]     | 1.000    | 1.000   |
| NMB       | 101         | 0         | 0.00%         | 196          | 0         | 0.00%         | 1.00 [0e+00-Inf]     | 1.000    | 1.000   |
| NME1-NME2 | 101         | 0         | 0.00%         | 196          | 0         | 0.00%         | 1.00 [0e+00-Inf]     | 1.000    | 1.000   |
| NME1      | 101         | 0         | 0.00%         | 196          | 0         | 0.00%         | 1.00 [0e+00-Inf]     | 1.000    | 1.000   |
| NME2      | 101         | 0         | 0.00%         | 196          | 0         | 0.00%         | 1.00 [0e+00-Inf]     | 1.000    | 1.000   |
| NME3      | 101         | 0         | 0.00%         | 196          | 0         | 0.00%         | 1.00 [0e+00-Inf]     | 1.000    | 1.000   |
| NME4      | 101         | 0         | 0.00%         | 196          | 0         | 0.00%         | 1.00 [0e+00-Inf]     | 1.000    | 1.000   |
| NME7      | 101         | 0         | 0.00%         | 196          | 0         | 0.00%         | 1.00 [0e+00-Inf]     | 1.000    | 1.000   |
| NMNAT2    | 101         | 0         | 0.00%         | 196          | 0         | 0.00%         | 1.00 [0e+00-Inf]     | 1.000    | 1.000   |
| NMRAL1    | 101         | 0         | 0.00%         | 196          | 0         | 0.00%         | 1.00 [0e+00-Inf]     | 1.000    | 1.000   |
| NNAT      | 101         | 0         | 0.00%         | 196          | 0         | 0.00%         | 1.00 [0e+00-Inf]     | 1.000    | 1.000   |
| NOD1      | 101         | 0         | 0.00%         | 196          | 0         | 0.00%         | 1.00 [0e+00-Inf]     | 1.000    | 1.000   |
| NOG       | 101         | 0         | 0.00%         | 196          | 0         | 0.00%         | 1.00 [0e+00-Inf]     | 1.000    | 1.000   |
| NOL11     | 101         | 0         | 0.00%         | 196          | 0         | 0.00%         | 1.00 [0e+00-Inf]     | 1.000    | 1.000   |
| NOM1      | 101         | 0         | 0.00%         | 196          | 0         | 0.00%         | 1.00 [0e+00-Inf]     | 1.000    | 1.000   |
| NOMO1     | 101         | 0         | 0.00%         | 196          | 0         | 0.00%         | 1.00 [0e+00-Inf]     | 1.000    | 1.000   |
| NOMO2     | 101         | 0         | 0.00%         | 196          | 0         | 0.00%         | 1.00 [0e+00-Inf]     | 1.000    | 1.000   |
| NOMO3     | 101         | 0         | 0.00%         | 196          | 0         | 0.00%         | 1.00 [0e+00-Inf]     | 1.000    | 1.000   |
| NOS1AP    | 101         | 0         | 0.00%         | 196          | 0         | 0.00%         | 1.00 [0e+00-Inf]     | 1.000    | 1.000   |
| NOS2      | 101         | 0         | 0.00%         | 196          | 0         | 0.00%         | 1.00 [0e+00-Inf]     | 1.000    | 1.000   |
| NOTUM     | 101         | 0         | 0.00%         | 196          | 0         | 0.00%         | 1.00 [0e+00-Inf]     | 1.000    | 1.000   |
| NOVA1     | 101         | 0         | 0.00%         | 196          | 0         | 0.00%         | 1.00 [0e+00-Inf]     | 1.000    | 1.000   |
| NOXO1     | 101         | 0         | 0.00%         | 196          | 0         | 0.00%         | 1.00 [0e+00-Inf]     | 1.000    | 1.000   |
| NPAS3     | 101         | 0         | 0.00%         | 196          | 0         | 0.00%         | 1.00 [0e+00-Inf]     | 1.000    | 1.000   |
| NPAS4     | 101         | 0         | 0.00%         | 196          | 0         | 0.00%         | 1.00 [0e+00-Inf]     | 1.000    | 1.000   |
| NPBWR1    | 101         | 0         | 0.00%         | 196          | 0         | 0.00%         | 1.00 [0e+00-Inf]     | 1.000    | 1.000   |
| NPBWR2    | 101         | 0         | 0.00%         | 196          | 0         | 0.00%         | 1.00 [0e+00-Inf]     | 1.000    | 1.000   |
| NPB       | 101         | 0         | 0.00%         | 196          | 0         | 0.00%         | 1.00 [0e+00-Inf]     | 1.000    | 1.000   |
| NPEPL1    | 101         | 0         | 0.00%         | 196          | 0         | 0.00%         | 1.00 [0e+00-Inf]     | 1.000    | 1.000   |
| NPEPPS    | 101         | 0         | 0.00%         | 196          | 0         | 0.00%         | 1.00 [0e+00-Inf]     | 1.000    | 1.000   |
| NPHS2     | 101         | 0         | 0.00%         | 196          | 0         | 0.00%         | 1.00 [0e+00-Inf]     | 1.000    | 1.000   |
| NPIP3     | 101         | 1         | 0.99%         | 196          | 0         | 0.00%         | 1.6e-08 [0e+00-Inf]  | 0.996    | 1.000   |
| NPIPA1    | 101         | 0         | 0.00%         | 196          | 0         | 0.00%         | 1.00 [0e+00-Inf]     | 1.000    | 1.000   |
| NPLOC4    | 101         | 0         | 0.00%         | 196          | 0         | 0.00%         | 1.00 [0e+00-Inf]     | 1.000    | 1.000   |
| NPL       | 101         | 0         | 0.00%         | 196          | 0         | 0.00%         | 1.00 [0e+00-Inf]     | 1.000    | 1.000   |
| NPR1      | 101         | 0         | 0.00%         | 196          | 0         | 0.00%         | 1.00 [0e+00-Inf]     | 1.000    | 1.000   |
| NPRL3     | 101         | 0         | 0.00%         | 196          | 0         | 0.00%         | 1.00 [0e+00-Inf]     | 1.000    | 1.000   |
| NPSR1     | 101         | 0         | 0.00%         | 196          | 0         | 0.00%         | 1.00 [0e+00-Inf]     | 1.000    | 1.000   |





| Symbol  | CINSARC Low |           |               | CINSARC High |           |               | CINSARC High vs. Low |          |         |
|---------|-------------|-----------|---------------|--------------|-----------|---------------|----------------------|----------|---------|
|         | N tested    | N altered | Fq alteration | N tested     | N altered | Fq alteration | OR [95%CI]           | p-value* | q-value |
| OR10Z1  | 101         | 0         | 0.00%         | 196          | 0         | 0.00%         | 1.00 [0e+00-Inf]     | 1.000    | 1.000   |
| OR11L1  | 101         | 0         | 0.00%         | 196          | 0         | 0.00%         | 1.00 [0e+00-Inf]     | 1.000    | 1.000   |
| OR13G1  | 101         | 0         | 0.00%         | 196          | 0         | 0.00%         | 1.00 [0e+00-Inf]     | 1.000    | 1.000   |
| OR14A16 | 101         | 0         | 0.00%         | 196          | 0         | 0.00%         | 1.00 [0e+00-Inf]     | 1.000    | 1.000   |
| OR14C36 | 101         | 0         | 0.00%         | 196          | 0         | 0.00%         | 1.00 [0e+00-Inf]     | 1.000    | 1.000   |
| OR14I1  | 101         | 0         | 0.00%         | 196          | 0         | 0.00%         | 1.00 [0e+00-Inf]     | 1.000    | 1.000   |
| OR1C1   | 101         | 0         | 0.00%         | 196          | 0         | 0.00%         | 1.00 [0e+00-Inf]     | 1.000    | 1.000   |
| OR1F1   | 101         | 0         | 0.00%         | 196          | 0         | 0.00%         | 1.00 [0e+00-Inf]     | 1.000    | 1.000   |
| OR1F2P  | 101         | 0         | 0.00%         | 196          | 0         | 0.00%         | 1.00 [0e+00-Inf]     | 1.000    | 1.000   |
| OR2A12  | 101         | 0         | 0.00%         | 196          | 0         | 0.00%         | 1.00 [0e+00-Inf]     | 1.000    | 1.000   |
| OR2A14  | 101         | 0         | 0.00%         | 196          | 0         | 0.00%         | 1.00 [0e+00-Inf]     | 1.000    | 1.000   |
| OR2A1   | 101         | 0         | 0.00%         | 196          | 0         | 0.00%         | 1.00 [0e+00-Inf]     | 1.000    | 1.000   |
| OR2A25  | 101         | 0         | 0.00%         | 196          | 0         | 0.00%         | 1.00 [0e+00-Inf]     | 1.000    | 1.000   |
| OR2A2   | 101         | 0         | 0.00%         | 196          | 0         | 0.00%         | 1.00 [0e+00-Inf]     | 1.000    | 1.000   |
| OR2A5   | 101         | 0         | 0.00%         | 196          | 0         | 0.00%         | 1.00 [0e+00-Inf]     | 1.000    | 1.000   |
| OR2A7   | 101         | 0         | 0.00%         | 196          | 0         | 0.00%         | 1.00 [0e+00-Inf]     | 1.000    | 1.000   |
| OR2A9P  | 101         | 0         | 0.00%         | 196          | 0         | 0.00%         | 1.00 [0e+00-Inf]     | 1.000    | 1.000   |
| OR2AK2  | 101         | 0         | 0.00%         | 196          | 0         | 0.00%         | 1.00 [0e+00-Inf]     | 1.000    | 1.000   |
| OR2AT4  | 101         | 0         | 0.00%         | 196          | 0         | 0.00%         | 1.00 [0e+00-Inf]     | 1.000    | 1.000   |
| OR2B11  | 101         | 0         | 0.00%         | 196          | 0         | 0.00%         | 1.00 [0e+00-Inf]     | 1.000    | 1.000   |
| OR2C1   | 101         | 0         | 0.00%         | 196          | 0         | 0.00%         | 1.00 [0e+00-Inf]     | 1.000    | 1.000   |
| OR2C3   | 101         | 0         | 0.00%         | 196          | 0         | 0.00%         | 1.00 [0e+00-Inf]     | 1.000    | 1.000   |
| OR2F1   | 101         | 0         | 0.00%         | 196          | 0         | 0.00%         | 1.00 [0e+00-Inf]     | 1.000    | 1.000   |
| OR2F2   | 101         | 0         | 0.00%         | 196          | 0         | 0.00%         | 1.00 [0e+00-Inf]     | 1.000    | 1.000   |
| OR2G2   | 101         | 0         | 0.00%         | 196          | 0         | 0.00%         | 1.00 [0e+00-Inf]     | 1.000    | 1.000   |
| OR2G3   | 101         | 0         | 0.00%         | 196          | 0         | 0.00%         | 1.00 [0e+00-Inf]     | 1.000    | 1.000   |
| OR2G6   | 101         | 0         | 0.00%         | 196          | 0         | 0.00%         | 1.00 [0e+00-Inf]     | 1.000    | 1.000   |
| OR2L13  | 101         | 0         | 0.00%         | 196          | 0         | 0.00%         | 1.00 [0e+00-Inf]     | 1.000    | 1.000   |
| OR2L1P  | 101         | 0         | 0.00%         | 196          | 0         | 0.00%         | 1.00 [0e+00-Inf]     | 1.000    | 1.000   |
| OR2L2   | 101         | 0         | 0.00%         | 196          | 0         | 0.00%         | 1.00 [0e+00-Inf]     | 1.000    | 1.000   |
| OR2L3   | 101         | 0         | 0.00%         | 196          | 0         | 0.00%         | 1.00 [0e+00-Inf]     | 1.000    | 1.000   |
| OR2L8   | 101         | 0         | 0.00%         | 196          | 0         | 0.00%         | 1.00 [0e+00-Inf]     | 1.000    | 1.000   |
| OR2M1P  | 101         | 0         | 0.00%         | 196          | 0         | 0.00%         | 1.00 [0e+00-Inf]     | 1.000    | 1.000   |
| OR2M2   | 101         | 0         | 0.00%         | 196          | 0         | 0.00%         | 1.00 [0e+00-Inf]     | 1.000    | 1.000   |
| OR2M3   | 101         | 0         | 0.00%         | 196          | 0         | 0.00%         | 1.00 [0e+00-Inf]     | 1.000    | 1.000   |
| OR2M4   | 101         | 0         | 0.00%         | 196          | 0         | 0.00%         | 1.00 [0e+00-Inf]     | 1.000    | 1.000   |
| OR2M5   | 101         | 0         | 0.00%         | 196          | 0         | 0.00%         | 1.00 [0e+00-Inf]     | 1.000    | 1.000   |
| OR2M7   | 101         | 0         | 0.00%         | 196          | 0         | 0.00%         | 1.00 [0e+00-Inf]     | 1.000    | 1.000   |
| OR2T10  | 101         | 3         | 2.97%         | 196          | 2         | 1.02%         | 0.34 [0.074-1.53]    | 0.237    | 1.000   |
| OR2T11  | 101         | 3         | 2.97%         | 196          | 2         | 1.02%         | 0.34 [0.074-1.53]    | 0.237    | 1.000   |
| OR2T12  | 101         | 0         | 0.00%         | 196          | 0         | 0.00%         | 1.00 [0e+00-Inf]     | 1.000    | 1.000   |
| OR2T1   | 101         | 0         | 0.00%         | 196          | 0         | 0.00%         | 1.00 [0e+00-Inf]     | 1.000    | 1.000   |
| OR2T27  | 101         | 0         | 0.00%         | 196          | 0         | 0.00%         | 1.00 [0e+00-Inf]     | 1.000    | 1.000   |
| OR2T29  | 101         | 0         | 0.00%         | 196          | 0         | 0.00%         | 1.00 [0e+00-Inf]     | 1.000    | 1.000   |
| OR2T2   | 101         | 0         | 0.00%         | 196          | 0         | 0.00%         | 1.00 [0e+00-Inf]     | 1.000    | 1.000   |
| OR2T33  | 101         | 0         | 0.00%         | 196          | 0         | 0.00%         | 1.00 [0e+00-Inf]     | 1.000    | 1.000   |
| OR2T34  | 101         | 1         | 0.99%         | 196          | 0         | 0.00%         | 1.6e-08 [0e+00-Inf]  | 0.996    | 1.000   |
| OR2T35  | 101         | 0         | 0.00%         | 196          | 0         | 0.00%         | 1.00 [0e+00-Inf]     | 1.000    | 1.000   |
| OR2T3   | 101         | 0         | 0.00%         | 196          | 0         | 0.00%         | 1.00 [0e+00-Inf]     | 1.000    | 1.000   |
| OR2T4   | 101         | 0         | 0.00%         | 196          | 0         | 0.00%         | 1.00 [0e+00-Inf]     | 1.000    | 1.000   |
| OR2T5   | 101         | 0         | 0.00%         | 196          | 0         | 0.00%         | 1.00 [0e+00-Inf]     | 1.000    | 1.000   |
| OR2T6   | 101         | 0         | 0.00%         | 196          | 0         | 0.00%         | 1.00 [0e+00-Inf]     | 1.000    | 1.000   |
| OR2T8   | 101         | 0         | 0.00%         | 196          | 0         | 0.00%         | 1.00 [0e+00-Inf]     | 1.000    | 1.000   |
| OR2W3   | 101         | 0         | 0.00%         | 196          | 0         | 0.00%         | 1.00 [0e+00-Inf]     | 1.000    | 1.000   |
| OR2W5   | 101         | 0         | 0.00%         | 196          | 0         | 0.00%         | 1.00 [0e+00-Inf]     | 1.000    | 1.000   |
| OR4C6   | 101         | 1         | 0.99%         | 196          | 4         | 2.04%         | 2.08 [0.33-13.25]    | 0.514    | 1.000   |
| OR4D1   | 101         | 0         | 0.00%         | 196          | 0         | 0.00%         | 1.00 [0e+00-Inf]     | 1.000    | 1.000   |
| OR4D2   | 101         | 0         | 0.00%         | 196          | 0         | 0.00%         | 1.00 [0e+00-Inf]     | 1.000    | 1.000   |
| OR4F5   | 101         | 0         | 0.00%         | 196          | 0         | 0.00%         | 1.00 [0e+00-Inf]     | 1.000    | 1.000   |
| OR4F6   | 101         | 0         | 0.00%         | 196          | 0         | 0.00%         | 1.00 [0e+00-Inf]     | 1.000    | 1.000   |
| OR4K1   | 101         | 0         | 0.00%         | 196          | 0         | 0.00%         | 1.00 [0e+00-Inf]     | 1.000    | 1.000   |
| OR4K2   | 101         | 1         | 0.99%         | 196          | 0         | 0.00%         | 1.6e-08 [0e+00-Inf]  | 0.996    | 1.000   |
| OR4K5   | 101         | 0         | 0.00%         | 196          | 0         | 0.00%         | 1.00 [0e+00-Inf]     | 1.000    | 1.000   |
| OR4M1   | 101         | 0         | 0.00%         | 196          | 0         | 0.00%         | 1.00 [0e+00-Inf]     | 1.000    | 1.000   |
| OR4M2   | 101         | 0         | 0.00%         | 196          | 0         | 0.00%         | 1.00 [0e+00-Inf]     | 1.000    | 1.000   |
| OR4N2   | 101         | 0         | 0.00%         | 196          | 0         | 0.00%         | 1.00 [0e+00-Inf]     | 1.000    | 1.000   |
| OR4N3P  | 101         | 0         | 0.00%         | 196          | 0         | 0.00%         | 1.00 [0e+00-Inf]     | 1.000    | 1.000   |
| OR4N4   | 101         | 0         | 0.00%         | 196          | 0         | 0.00%         | 1.00 [0e+00-Inf]     | 1.000    | 1.000   |
| OR4P4   | 101         | 1         | 0.99%         | 196          | 4         | 2.04%         | 2.08 [0.33-13.25]    | 0.514    | 1.000   |
| OR4Q3   | 101         | 0         | 0.00%         | 196          | 0         | 0.00%         | 1.00 [0e+00-Inf]     | 1.000    | 1.000   |
| OR4S2   | 101         | 1         | 0.99%         | 196          | 4         | 2.04%         | 2.08 [0.33-13.25]    | 0.514    | 1.000   |

| Symbol  | CINSARC Low |           |               | CINSARC High |           |               | CINSARC High vs. Low |          |         |
|---------|-------------|-----------|---------------|--------------|-----------|---------------|----------------------|----------|---------|
|         | N tested    | N altered | Fq alteration | N tested     | N altered | Fq alteration | OR [95%CI]           | p-value* | q-value |
| OR52N5  | 101         | 3         | 2.97%         | 196          | 7         | 3.57%         | 1.21 [0.38-3.83]     | 0.786    | 1.000   |
| OR6B1   | 101         | 0         | 0.00%         | 196          | 0         | 0.00%         | 1.00 [0e+00-Inf]     | 1.000    | 1.000   |
| OR6F1   | 101         | 0         | 0.00%         | 196          | 0         | 0.00%         | 1.00 [0e+00-Inf]     | 1.000    | 1.000   |
| OR6K2   | 101         | 0         | 0.00%         | 196          | 0         | 0.00%         | 1.00 [0e+00-Inf]     | 1.000    | 1.000   |
| OR6K3   | 101         | 0         | 0.00%         | 196          | 0         | 0.00%         | 1.00 [0e+00-Inf]     | 1.000    | 1.000   |
| OR6K6   | 101         | 0         | 0.00%         | 196          | 0         | 0.00%         | 1.00 [0e+00-Inf]     | 1.000    | 1.000   |
| OR6N1   | 101         | 0         | 0.00%         | 196          | 0         | 0.00%         | 1.00 [0e+00-Inf]     | 1.000    | 1.000   |
| OR6N2   | 101         | 0         | 0.00%         | 196          | 0         | 0.00%         | 1.00 [0e+00-Inf]     | 1.000    | 1.000   |
| OR6P1   | 101         | 0         | 0.00%         | 196          | 0         | 0.00%         | 1.00 [0e+00-Inf]     | 1.000    | 1.000   |
| OR6V1   | 101         | 0         | 0.00%         | 196          | 0         | 0.00%         | 1.00 [0e+00-Inf]     | 1.000    | 1.000   |
| OR6W1P  | 101         | 0         | 0.00%         | 196          | 0         | 0.00%         | 1.00 [0e+00-Inf]     | 1.000    | 1.000   |
| OR6Y1   | 101         | 0         | 0.00%         | 196          | 0         | 0.00%         | 1.00 [0e+00-Inf]     | 1.000    | 1.000   |
| OR9A2   | 101         | 0         | 0.00%         | 196          | 0         | 0.00%         | 1.00 [0e+00-Inf]     | 1.000    | 1.000   |
| ORAI3   | 101         | 0         | 0.00%         | 196          | 0         | 0.00%         | 1.00 [0e+00-Inf]     | 1.000    | 1.000   |
| ORMDL3  | 101         | 0         | 0.00%         | 196          | 0         | 0.00%         | 1.00 [0e+00-Inf]     | 1.000    | 1.000   |
| OSBPL2  | 101         | 0         | 0.00%         | 196          | 0         | 0.00%         | 1.00 [0e+00-Inf]     | 1.000    | 1.000   |
| OSBPL3  | 101         | 0         | 0.00%         | 196          | 0         | 0.00%         | 1.00 [0e+00-Inf]     | 1.000    | 1.000   |
| OSBPL7  | 101         | 0         | 0.00%         | 196          | 0         | 0.00%         | 1.00 [0e+00-Inf]     | 1.000    | 1.000   |
| OSBPL8  | 101         | 0         | 0.00%         | 196          | 0         | 0.00%         | 1.00 [0e+00-Inf]     | 1.000    | 1.000   |
| OSGIN2  | 101         | 0         | 0.00%         | 196          | 0         | 0.00%         | 1.00 [0e+00-Inf]     | 1.000    | 1.000   |
| OSR2    | 101         | 0         | 0.00%         | 196          | 0         | 0.00%         | 1.00 [0e+00-Inf]     | 1.000    | 1.000   |
| OSTM1   | 101         | 0         | 0.00%         | 196          | 0         | 0.00%         | 1.00 [0e+00-Inf]     | 1.000    | 1.000   |
| OSTN    | 101         | 0         | 0.00%         | 196          | 0         | 0.00%         | 1.00 [0e+00-Inf]     | 1.000    | 1.000   |
| SLC51A  | 101         | 0         | 0.00%         | 196          | 0         | 0.00%         | 1.00 [0e+00-Inf]     | 1.000    | 1.000   |
| OTOA    | 101         | 0         | 0.00%         | 196          | 0         | 0.00%         | 1.00 [0e+00-Inf]     | 1.000    | 1.000   |
| OTOP2   | 101         | 0         | 0.00%         | 196          | 0         | 0.00%         | 1.00 [0e+00-Inf]     | 1.000    | 1.000   |
| OTOP3   | 101         | 0         | 0.00%         | 196          | 0         | 0.00%         | 1.00 [0e+00-Inf]     | 1.000    | 1.000   |
| OTUD6B  | 101         | 0         | 0.00%         | 196          | 0         | 0.00%         | 1.00 [0e+00-Inf]     | 1.000    | 1.000   |
| OTUD7B  | 101         | 0         | 0.00%         | 196          | 0         | 0.00%         | 1.00 [0e+00-Inf]     | 1.000    | 1.000   |
| OXR1    | 101         | 0         | 0.00%         | 196          | 0         | 0.00%         | 1.00 [0e+00-Inf]     | 1.000    | 1.000   |
| P2RY12  | 101         | 0         | 0.00%         | 196          | 0         | 0.00%         | 1.00 [0e+00-Inf]     | 1.000    | 1.000   |
| P2RY13  | 101         | 0         | 0.00%         | 196          | 0         | 0.00%         | 1.00 [0e+00-Inf]     | 1.000    | 1.000   |
| P2RY14  | 101         | 0         | 0.00%         | 196          | 0         | 0.00%         | 1.00 [0e+00-Inf]     | 1.000    | 1.000   |
| P2RY2   | 101         | 0         | 0.00%         | 196          | 0         | 0.00%         | 1.00 [0e+00-Inf]     | 1.000    | 1.000   |
| P2RY6   | 101         | 0         | 0.00%         | 196          | 0         | 0.00%         | 1.00 [0e+00-Inf]     | 1.000    | 1.000   |
| P4HA1   | 101         | 0         | 0.00%         | 196          | 0         | 0.00%         | 1.00 [0e+00-Inf]     | 1.000    | 1.000   |
| P4HA3   | 101         | 0         | 0.00%         | 196          | 0         | 0.00%         | 1.00 [0e+00-Inf]     | 1.000    | 1.000   |
| P4HB    | 101         | 0         | 0.00%         | 196          | 0         | 0.00%         | 1.00 [0e+00-Inf]     | 1.000    | 1.000   |
| POTEM   | 101         | 0         | 0.00%         | 196          | 0         | 0.00%         | 1.00 [0e+00-Inf]     | 1.000    | 1.000   |
| PAAF1   | 101         | 0         | 0.00%         | 196          | 0         | 0.00%         | 1.00 [0e+00-Inf]     | 1.000    | 1.000   |
| PABPC1L | 101         | 0         | 0.00%         | 196          | 0         | 0.00%         | 1.00 [0e+00-Inf]     | 1.000    | 1.000   |
| PABPC1  | 101         | 0         | 0.00%         | 196          | 0         | 0.00%         | 1.00 [0e+00-Inf]     | 1.000    | 1.000   |
| PACS1   | 101         | 0         | 0.00%         | 196          | 0         | 0.00%         | 1.00 [0e+00-Inf]     | 1.000    | 1.000   |
| PAG1    | 101         | 0         | 0.00%         | 196          | 0         | 0.00%         | 1.00 [0e+00-Inf]     | 1.000    | 1.000   |
| PAK1    | 101         | 0         | 0.00%         | 196          | 0         | 0.00%         | 1.00 [0e+00-Inf]     | 1.000    | 1.000   |
| PAK2    | 101         | 0         | 0.00%         | 196          | 0         | 0.00%         | 1.00 [0e+00-Inf]     | 1.000    | 1.000   |
| PALB2   | 101         | 0         | 0.00%         | 196          | 0         | 0.00%         | 1.00 [0e+00-Inf]     | 1.000    | 1.000   |
| PAPPA2  | 101         | 0         | 0.00%         | 196          | 0         | 0.00%         | 1.00 [0e+00-Inf]     | 1.000    | 1.000   |
| PAQR4   | 101         | 0         | 0.00%         | 196          | 0         | 0.00%         | 1.00 [0e+00-Inf]     | 1.000    | 1.000   |
| PAQR6   | 101         | 0         | 0.00%         | 196          | 0         | 0.00%         | 1.00 [0e+00-Inf]     | 1.000    | 1.000   |
| PAWR    | 101         | 0         | 0.00%         | 196          | 0         | 0.00%         | 1.00 [0e+00-Inf]     | 1.000    | 1.000   |
| PARD6B  | 101         | 0         | 0.00%         | 196          | 0         | 0.00%         | 1.00 [0e+00-Inf]     | 1.000    | 1.000   |
| PARL    | 101         | 0         | 0.00%         | 196          | 0         | 0.00%         | 1.00 [0e+00-Inf]     | 1.000    | 1.000   |
| PARM1   | 101         | 0         | 0.00%         | 196          | 0         | 0.00%         | 1.00 [0e+00-Inf]     | 1.000    | 1.000   |
| PARN    | 101         | 0         | 0.00%         | 196          | 0         | 0.00%         | 1.00 [0e+00-Inf]     | 1.000    | 1.000   |
| PARP10  | 101         | 0         | 0.00%         | 196          | 0         | 0.00%         | 1.00 [0e+00-Inf]     | 1.000    | 1.000   |
| PARP1   | 101         | 0         | 0.00%         | 196          | 0         | 0.00%         | 1.00 [0e+00-Inf]     | 1.000    | 1.000   |
| PARP6   | 101         | 0         | 0.00%         | 196          | 0         | 0.00%         | 1.00 [0e+00-Inf]     | 1.000    | 1.000   |
| PAX9    | 101         | 0         | 0.00%         | 196          | 0         | 0.00%         | 1.00 [0e+00-Inf]     | 1.000    | 1.000   |
| PBX1    | 101         | 0         | 0.00%         | 196          | 0         | 0.00%         | 1.00 [0e+00-Inf]     | 1.000    | 1.000   |
| PBXIP1  | 101         | 0         | 0.00%         | 196          | 0         | 0.00%         | 1.00 [0e+00-Inf]     | 1.000    | 1.000   |
| PCDH11Y | 101         | 58        | 57.43%        | 196          | 102       | 52.04%        | 0.80 [0.54-1.21]     | 0.378    | 1.000   |
| PCF11   | 101         | 0         | 0.00%         | 196          | 0         | 0.00%         | 1.00 [0e+00-Inf]     | 1.000    | 1.000   |
| PCGF2   | 101         | 0         | 0.00%         | 196          | 0         | 0.00%         | 1.00 [0e+00-Inf]     | 1.000    | 1.000   |
| PCIF1   | 101         | 0         | 0.00%         | 196          | 0         | 0.00%         | 1.00 [0e+00-Inf]     | 1.000    | 1.000   |
| PCK1    | 101         | 0         | 0.00%         | 196          | 0         | 0.00%         | 1.00 [0e+00-Inf]     | 1.000    | 1.000   |
| PCMTD1  | 101         | 0         | 0.00%         | 196          | 0         | 0.00%         | 1.00 [0e+00-Inf]     | 1.000    | 1.000   |
| PCMTD2  | 101         | 0         | 0.00%         | 196          | 0         | 0.00%         | 1.00 [0e+00-Inf]     | 1.000    | 1.000   |
| PCP4L1  | 101         | 0         | 0.00%         | 196          | 0         | 0.00%         | 1.00 [0e+00-Inf]     | 1.000    | 1.000   |
| PCSK6   | 101         | 0         | 0.00%         | 196          | 0         | 0.00%         | 1.00 [0e+00-Inf]     | 1.000    | 1.000   |
| PCTP    | 101         | 0         | 0.00%         | 196          | 0         | 0.00%         | 1.00 [0e+00-Inf]     | 1.000    | 1.000   |

| Symbol   | CINSARC Low |           |               | CINSARC High |           |               | CINSARC High vs. Low |          |         |
|----------|-------------|-----------|---------------|--------------|-----------|---------------|----------------------|----------|---------|
|          | N tested    | N altered | Fq alteration | N tested     | N altered | Fq alteration | OR [95%CI]           | p-value* | q-value |
| PCYT1A   | 101         | 0         | 0.00%         | 196          | 0         | 0.00%         | 1.00 [0e+00-Inf]     | 1.000    | 1.000   |
| PCYT2    | 101         | 0         | 0.00%         | 196          | 0         | 0.00%         | 1.00 [0e+00-Inf]     | 1.000    | 1.000   |
| PC       | 101         | 0         | 0.00%         | 196          | 0         | 0.00%         | 1.00 [0e+00-Inf]     | 1.000    | 1.000   |
| PDC      | 101         | 0         | 0.00%         | 196          | 0         | 0.00%         | 1.00 [0e+00-Inf]     | 1.000    | 1.000   |
| PDE1C    | 101         | 0         | 0.00%         | 196          | 0         | 0.00%         | 1.00 [0e+00-Inf]     | 1.000    | 1.000   |
| PDE2A    | 101         | 0         | 0.00%         | 196          | 0         | 0.00%         | 1.00 [0e+00-Inf]     | 1.000    | 1.000   |
| PDE4DIP  | 101         | 0         | 0.00%         | 196          | 0         | 0.00%         | 1.00 [0e+00-Inf]     | 1.000    | 1.000   |
| PDE6G    | 101         | 0         | 0.00%         | 196          | 0         | 0.00%         | 1.00 [0e+00-Inf]     | 1.000    | 1.000   |
| PDE7A    | 101         | 0         | 0.00%         | 196          | 0         | 0.00%         | 1.00 [0e+00-Inf]     | 1.000    | 1.000   |
| PDE8A    | 101         | 0         | 0.00%         | 196          | 0         | 0.00%         | 1.00 [0e+00-Inf]     | 1.000    | 1.000   |
| PDIA2    | 101         | 0         | 0.00%         | 196          | 0         | 0.00%         | 1.00 [0e+00-Inf]     | 1.000    | 1.000   |
| PDIA3P1  | 101         | 0         | 0.00%         | 196          | 0         | 0.00%         | 1.00 [0e+00-Inf]     | 1.000    | 1.000   |
| PDILT    | 101         | 0         | 0.00%         | 196          | 0         | 0.00%         | 1.00 [0e+00-Inf]     | 1.000    | 1.000   |
| PDK2     | 101         | 0         | 0.00%         | 196          | 0         | 0.00%         | 1.00 [0e+00-Inf]     | 1.000    | 1.000   |
| PDP1     | 101         | 0         | 0.00%         | 196          | 0         | 0.00%         | 1.00 [0e+00-Inf]     | 1.000    | 1.000   |
| PDPK1    | 101         | 0         | 0.00%         | 196          | 0         | 0.00%         | 1.00 [0e+00-Inf]     | 1.000    | 1.000   |
| PDS2     | 101         | 0         | 0.00%         | 196          | 0         | 0.00%         | 1.00 [0e+00-Inf]     | 1.000    | 1.000   |
| PDXDC1   | 101         | 0         | 0.00%         | 196          | 0         | 0.00%         | 1.00 [0e+00-Inf]     | 1.000    | 1.000   |
| PDZD9    | 101         | 0         | 0.00%         | 196          | 0         | 0.00%         | 1.00 [0e+00-Inf]     | 1.000    | 1.000   |
| PDZK1P1  | 101         | 0         | 0.00%         | 196          | 0         | 0.00%         | 1.00 [0e+00-Inf]     | 1.000    | 1.000   |
| PDZK1    | 101         | 0         | 0.00%         | 196          | 0         | 0.00%         | 1.00 [0e+00-Inf]     | 1.000    | 1.000   |
| PEA15    | 101         | 0         | 0.00%         | 196          | 0         | 0.00%         | 1.00 [0e+00-Inf]     | 1.000    | 1.000   |
| PEAR1    | 101         | 0         | 0.00%         | 196          | 0         | 0.00%         | 1.00 [0e+00-Inf]     | 1.000    | 1.000   |
| PECAM1   | 101         | 0         | 0.00%         | 196          | 0         | 0.00%         | 1.00 [0e+00-Inf]     | 1.000    | 1.000   |
| PELI3    | 101         | 0         | 0.00%         | 196          | 0         | 0.00%         | 1.00 [0e+00-Inf]     | 1.000    | 1.000   |
| PENK     | 101         | 0         | 0.00%         | 196          | 0         | 0.00%         | 1.00 [0e+00-Inf]     | 1.000    | 1.000   |
| PEX11A   | 101         | 0         | 0.00%         | 196          | 0         | 0.00%         | 1.00 [0e+00-Inf]     | 1.000    | 1.000   |
| PEX11B   | 101         | 0         | 0.00%         | 196          | 0         | 0.00%         | 1.00 [0e+00-Inf]     | 1.000    | 1.000   |
| PEX19    | 101         | 0         | 0.00%         | 196          | 0         | 0.00%         | 1.00 [0e+00-Inf]     | 1.000    | 1.000   |
| PEX2     | 101         | 0         | 0.00%         | 196          | 0         | 0.00%         | 1.00 [0e+00-Inf]     | 1.000    | 1.000   |
| PEX5L    | 101         | 0         | 0.00%         | 196          | 0         | 0.00%         | 1.00 [0e+00-Inf]     | 1.000    | 1.000   |
| PF4V1    | 101         | 0         | 0.00%         | 196          | 0         | 0.00%         | 1.00 [0e+00-Inf]     | 1.000    | 1.000   |
| PF4      | 101         | 0         | 0.00%         | 196          | 0         | 0.00%         | 1.00 [0e+00-Inf]     | 1.000    | 1.000   |
| PFDN2    | 101         | 0         | 0.00%         | 196          | 0         | 0.00%         | 1.00 [0e+00-Inf]     | 1.000    | 1.000   |
| PFDN4    | 101         | 0         | 0.00%         | 196          | 0         | 0.00%         | 1.00 [0e+00-Inf]     | 1.000    | 1.000   |
| PFKFB2   | 101         | 0         | 0.00%         | 196          | 0         | 0.00%         | 1.00 [0e+00-Inf]     | 1.000    | 1.000   |
| PGA3     | 101         | 0         | 0.00%         | 196          | 0         | 0.00%         | 1.00 [0e+00-Inf]     | 1.000    | 1.000   |
| PGA4     | 101         | 0         | 0.00%         | 196          | 0         | 0.00%         | 1.00 [0e+00-Inf]     | 1.000    | 1.000   |
| PGA5     | 101         | 0         | 0.00%         | 196          | 0         | 0.00%         | 1.00 [0e+00-Inf]     | 1.000    | 1.000   |
| PGAP3    | 101         | 0         | 0.00%         | 196          | 0         | 0.00%         | 1.00 [0e+00-Inf]     | 1.000    | 1.000   |
| PGBD2    | 101         | 0         | 0.00%         | 196          | 0         | 0.00%         | 1.00 [0e+00-Inf]     | 1.000    | 1.000   |
| PGBD5    | 101         | 0         | 0.00%         | 196          | 0         | 0.00%         | 1.00 [0e+00-Inf]     | 1.000    | 1.000   |
| CPQ      | 101         | 0         | 0.00%         | 196          | 0         | 0.00%         | 1.00 [0e+00-Inf]     | 1.000    | 1.000   |
| PGLYRP3  | 101         | 0         | 0.00%         | 196          | 0         | 0.00%         | 1.00 [0e+00-Inf]     | 1.000    | 1.000   |
| PGLYRP4  | 101         | 0         | 0.00%         | 196          | 0         | 0.00%         | 1.00 [0e+00-Inf]     | 1.000    | 1.000   |
| PGM2L1   | 101         | 0         | 0.00%         | 196          | 0         | 0.00%         | 1.00 [0e+00-Inf]     | 1.000    | 1.000   |
| PGPEP1L  | 101         | 0         | 0.00%         | 196          | 0         | 0.00%         | 1.00 [0e+00-Inf]     | 1.000    | 1.000   |
| PGP      | 101         | 0         | 0.00%         | 196          | 0         | 0.00%         | 1.00 [0e+00-Inf]     | 1.000    | 1.000   |
| PGS1     | 101         | 0         | 0.00%         | 196          | 0         | 0.00%         | 1.00 [0e+00-Inf]     | 1.000    | 1.000   |
| PHACTR1  | 101         | 0         | 0.00%         | 196          | 0         | 0.00%         | 1.00 [0e+00-Inf]     | 1.000    | 1.000   |
| PHACTR3  | 101         | 0         | 0.00%         | 196          | 0         | 0.00%         | 1.00 [0e+00-Inf]     | 1.000    | 1.000   |
| PHB      | 101         | 0         | 0.00%         | 196          | 0         | 0.00%         | 1.00 [0e+00-Inf]     | 1.000    | 1.000   |
| PHF12    | 101         | 0         | 0.00%         | 196          | 0         | 0.00%         | 1.00 [0e+00-Inf]     | 1.000    | 1.000   |
| PHF20L1  | 101         | 0         | 0.00%         | 196          | 0         | 0.00%         | 1.00 [0e+00-Inf]     | 1.000    | 1.000   |
| PHF20    | 101         | 0         | 0.00%         | 196          | 0         | 0.00%         | 1.00 [0e+00-Inf]     | 1.000    | 1.000   |
| PHKB     | 101         | 0         | 0.00%         | 196          | 0         | 0.00%         | 1.00 [0e+00-Inf]     | 1.000    | 1.000   |
| PHKG2    | 101         | 0         | 0.00%         | 196          | 0         | 0.00%         | 1.00 [0e+00-Inf]     | 1.000    | 1.000   |
| PHLDA1   | 101         | 0         | 0.00%         | 196          | 0         | 0.00%         | 1.00 [0e+00-Inf]     | 1.000    | 1.000   |
| PHLDA3   | 101         | 0         | 0.00%         | 196          | 0         | 0.00%         | 1.00 [0e+00-Inf]     | 1.000    | 1.000   |
| PHOSPHO1 | 101         | 0         | 0.00%         | 196          | 0         | 0.00%         | 1.00 [0e+00-Inf]     | 1.000    | 1.000   |
| PHOX2A   | 101         | 0         | 0.00%         | 196          | 0         | 0.00%         | 1.00 [0e+00-Inf]     | 1.000    | 1.000   |
| PI15     | 101         | 0         | 0.00%         | 196          | 0         | 0.00%         | 1.00 [0e+00-Inf]     | 1.000    | 1.000   |
| PI3      | 101         | 0         | 0.00%         | 196          | 0         | 0.00%         | 1.00 [0e+00-Inf]     | 1.000    | 1.000   |
| PI4KB    | 101         | 0         | 0.00%         | 196          | 0         | 0.00%         | 1.00 [0e+00-Inf]     | 1.000    | 1.000   |
| PIAS3    | 101         | 0         | 0.00%         | 196          | 0         | 0.00%         | 1.00 [0e+00-Inf]     | 1.000    | 1.000   |
| PIGC     | 101         | 0         | 0.00%         | 196          | 0         | 0.00%         | 1.00 [0e+00-Inf]     | 1.000    | 1.000   |
| PIGM     | 101         | 0         | 0.00%         | 196          | 0         | 0.00%         | 1.00 [0e+00-Inf]     | 1.000    | 1.000   |
| PIGQ     | 101         | 0         | 0.00%         | 196          | 0         | 0.00%         | 1.00 [0e+00-Inf]     | 1.000    | 1.000   |
| PIGR     | 101         | 0         | 0.00%         | 196          | 0         | 0.00%         | 1.00 [0e+00-Inf]     | 1.000    | 1.000   |
| PIGS     | 101         | 0         | 0.00%         | 196          | 0         | 0.00%         | 1.00 [0e+00-Inf]     | 1.000    | 1.000   |
| PIGT     | 101         | 0         | 0.00%         | 196          | 0         | 0.00%         | 1.00 [0e+00-Inf]     | 1.000    | 1.000   |

| Symbol           | CINSARC Low |           |               | CINSARC High |           |               | CINSARC High vs. Low |          |         |
|------------------|-------------|-----------|---------------|--------------|-----------|---------------|----------------------|----------|---------|
|                  | N tested    | N altered | Fq alteration | N tested     | N altered | Fq alteration | OR [95%CI]           | p-value* | q-value |
| <i>PIGU</i>      | 101         | 0         | 0.00%         | 196          | 0         | 0.00%         | 1.00 [0e+00-Inf]     | 1.000    | 1.000   |
| <i>PIGW</i>      | 101         | 0         | 0.00%         | 196          | 0         | 0.00%         | 1.00 [0e+00-Inf]     | 1.000    | 1.000   |
| <i>PIGX</i>      | 101         | 0         | 0.00%         | 196          | 0         | 0.00%         | 1.00 [0e+00-Inf]     | 1.000    | 1.000   |
| <i>PIGZ</i>      | 101         | 0         | 0.00%         | 196          | 0         | 0.00%         | 1.00 [0e+00-Inf]     | 1.000    | 1.000   |
| <i>PIK3C2B</i>   | 101         | 0         | 0.00%         | 196          | 0         | 0.00%         | 1.00 [0e+00-Inf]     | 1.000    | 1.000   |
| <i>PIK3CA</i>    | 101         | 0         | 0.00%         | 196          | 0         | 0.00%         | 1.00 [0e+00-Inf]     | 1.000    | 1.000   |
| <i>PIP4K2B</i>   | 101         | 0         | 0.00%         | 196          | 0         | 0.00%         | 1.00 [0e+00-Inf]     | 1.000    | 1.000   |
| <i>PIP5K1A</i>   | 101         | 0         | 0.00%         | 196          | 0         | 0.00%         | 1.00 [0e+00-Inf]     | 1.000    | 1.000   |
| <i>PIPOX</i>     | 101         | 0         | 0.00%         | 196          | 0         | 0.00%         | 1.00 [0e+00-Inf]     | 1.000    | 1.000   |
| <i>PIP</i>       | 101         | 0         | 0.00%         | 196          | 0         | 0.00%         | 1.00 [0e+00-Inf]     | 1.000    | 1.000   |
| <i>PITPNC1</i>   | 101         | 0         | 0.00%         | 196          | 0         | 0.00%         | 1.00 [0e+00-Inf]     | 1.000    | 1.000   |
| <i>PITPNM1</i>   | 101         | 0         | 0.00%         | 196          | 0         | 0.00%         | 1.00 [0e+00-Inf]     | 1.000    | 1.000   |
| <i>PKD1</i>      | 101         | 0         | 0.00%         | 196          | 0         | 0.00%         | 1.00 [0e+00-Inf]     | 1.000    | 1.000   |
| <i>PKHD1L1</i>   | 101         | 0         | 0.00%         | 196          | 0         | 0.00%         | 1.00 [0e+00-Inf]     | 1.000    | 1.000   |
| <i>PKIA</i>      | 101         | 0         | 0.00%         | 196          | 0         | 0.00%         | 1.00 [0e+00-Inf]     | 1.000    | 1.000   |
| <i>PKIG</i>      | 101         | 0         | 0.00%         | 196          | 0         | 0.00%         | 1.00 [0e+00-Inf]     | 1.000    | 1.000   |
| <i>PKLR</i>      | 101         | 0         | 0.00%         | 196          | 0         | 0.00%         | 1.00 [0e+00-Inf]     | 1.000    | 1.000   |
| <i>PKMYT1</i>    | 101         | 0         | 0.00%         | 196          | 0         | 0.00%         | 1.00 [0e+00-Inf]     | 1.000    | 1.000   |
| <i>PKP1</i>      | 101         | 0         | 0.00%         | 196          | 0         | 0.00%         | 1.00 [0e+00-Inf]     | 1.000    | 1.000   |
| <i>PLA2G10</i>   | 101         | 0         | 0.00%         | 196          | 0         | 0.00%         | 1.00 [0e+00-Inf]     | 1.000    | 1.000   |
| <i>PLA2G4A</i>   | 101         | 0         | 0.00%         | 196          | 0         | 0.00%         | 1.00 [0e+00-Inf]     | 1.000    | 1.000   |
| <i>PLAG1</i>     | 101         | 0         | 0.00%         | 196          | 0         | 0.00%         | 1.00 [0e+00-Inf]     | 1.000    | 1.000   |
| <i>PLAT</i>      | 101         | 0         | 0.00%         | 196          | 0         | 0.00%         | 1.00 [0e+00-Inf]     | 1.000    | 1.000   |
| <i>PLAU</i>      | 101         | 0         | 0.00%         | 196          | 0         | 0.00%         | 1.00 [0e+00-Inf]     | 1.000    | 1.000   |
| <i>PLCG1</i>     | 101         | 0         | 0.00%         | 196          | 0         | 0.00%         | 1.00 [0e+00-Inf]     | 1.000    | 1.000   |
| <i>PLCXD1</i>    | 101         | 0         | 0.00%         | 196          | 0         | 0.00%         | 1.00 [0e+00-Inf]     | 1.000    | 1.000   |
| <i>PLD5</i>      | 101         | 0         | 0.00%         | 196          | 0         | 0.00%         | 1.00 [0e+00-Inf]     | 1.000    | 1.000   |
| <i>PLEC</i>      | 101         | 0         | 0.00%         | 196          | 0         | 0.00%         | 1.00 [0e+00-Inf]     | 1.000    | 1.000   |
| <i>PLEKHA2</i>   | 101         | 0         | 0.00%         | 196          | 0         | 0.00%         | 1.00 [0e+00-Inf]     | 1.000    | 1.000   |
| <i>PLEKHA6</i>   | 101         | 0         | 0.00%         | 196          | 0         | 0.00%         | 1.00 [0e+00-Inf]     | 1.000    | 1.000   |
| <i>PLEKHA7</i>   | 101         | 0         | 0.00%         | 196          | 0         | 0.00%         | 1.00 [0e+00-Inf]     | 1.000    | 1.000   |
| <i>PLEKHA8</i>   | 101         | 0         | 0.00%         | 196          | 0         | 0.00%         | 1.00 [0e+00-Inf]     | 1.000    | 1.000   |
| <i>PLEKHB1</i>   | 101         | 0         | 0.00%         | 196          | 0         | 0.00%         | 1.00 [0e+00-Inf]     | 1.000    | 1.000   |
| <i>PLEKHF2</i>   | 101         | 0         | 0.00%         | 196          | 0         | 0.00%         | 1.00 [0e+00-Inf]     | 1.000    | 1.000   |
| <i>PLEKHG7</i>   | 101         | 0         | 0.00%         | 196          | 0         | 0.00%         | 1.00 [0e+00-Inf]     | 1.000    | 1.000   |
| <i>PLEKHO1</i>   | 101         | 0         | 0.00%         | 196          | 0         | 0.00%         | 1.00 [0e+00-Inf]     | 1.000    | 1.000   |
| <i>PLIN1</i>     | 101         | 0         | 0.00%         | 196          | 0         | 0.00%         | 1.00 [0e+00-Inf]     | 1.000    | 1.000   |
| <i>PLK1</i>      | 101         | 0         | 0.00%         | 196          | 0         | 0.00%         | 1.00 [0e+00-Inf]     | 1.000    | 1.000   |
| <i>PLTP</i>      | 101         | 0         | 0.00%         | 196          | 0         | 0.00%         | 1.00 [0e+00-Inf]     | 1.000    | 1.000   |
| <i>PLXDC1</i>    | 101         | 0         | 0.00%         | 196          | 0         | 0.00%         | 1.00 [0e+00-Inf]     | 1.000    | 1.000   |
| <i>PLXNA2</i>    | 101         | 0         | 0.00%         | 196          | 0         | 0.00%         | 1.00 [0e+00-Inf]     | 1.000    | 1.000   |
| <i>PM20D1</i>    | 101         | 0         | 0.00%         | 196          | 0         | 0.00%         | 1.00 [0e+00-Inf]     | 1.000    | 1.000   |
| <i>PMAIP1</i>    | 101         | 0         | 0.00%         | 196          | 0         | 0.00%         | 1.00 [0e+00-Inf]     | 1.000    | 1.000   |
| <i>PMEPA1</i>    | 101         | 0         | 0.00%         | 196          | 0         | 0.00%         | 1.00 [0e+00-Inf]     | 1.000    | 1.000   |
| <i>PMF1</i>      | 101         | 0         | 0.00%         | 196          | 0         | 0.00%         | 1.00 [0e+00-Inf]     | 1.000    | 1.000   |
| <i>PMM2</i>      | 101         | 0         | 0.00%         | 196          | 0         | 0.00%         | 1.00 [0e+00-Inf]     | 1.000    | 1.000   |
| <i>PMP2</i>      | 101         | 0         | 0.00%         | 196          | 0         | 0.00%         | 1.00 [0e+00-Inf]     | 1.000    | 1.000   |
| <i>PMVK</i>      | 101         | 0         | 0.00%         | 196          | 0         | 0.00%         | 1.00 [0e+00-Inf]     | 1.000    | 1.000   |
| <i>PNMT</i>      | 101         | 0         | 0.00%         | 196          | 0         | 0.00%         | 1.00 [0e+00-Inf]     | 1.000    | 1.000   |
| <i>PNPO</i>      | 101         | 0         | 0.00%         | 196          | 0         | 0.00%         | 1.00 [0e+00-Inf]     | 1.000    | 1.000   |
| <i>POC1B</i>     | 101         | 0         | 0.00%         | 196          | 0         | 0.00%         | 1.00 [0e+00-Inf]     | 1.000    | 1.000   |
| <i>POGK</i>      | 101         | 0         | 0.00%         | 196          | 0         | 0.00%         | 1.00 [0e+00-Inf]     | 1.000    | 1.000   |
| <i>POGZ</i>      | 101         | 0         | 0.00%         | 196          | 0         | 0.00%         | 1.00 [0e+00-Inf]     | 1.000    | 1.000   |
| <i>POLB</i>      | 101         | 0         | 0.00%         | 196          | 0         | 0.00%         | 1.00 [0e+00-Inf]     | 1.000    | 1.000   |
| <i>POLD3</i>     | 101         | 0         | 0.00%         | 196          | 0         | 0.00%         | 1.00 [0e+00-Inf]     | 1.000    | 1.000   |
| <i>POLD4</i>     | 101         | 0         | 0.00%         | 196          | 0         | 0.00%         | 1.00 [0e+00-Inf]     | 1.000    | 1.000   |
| <i>POLDIP2</i>   | 101         | 0         | 0.00%         | 196          | 0         | 0.00%         | 1.00 [0e+00-Inf]     | 1.000    | 1.000   |
| <i>POLG2</i>     | 101         | 0         | 0.00%         | 196          | 0         | 0.00%         | 1.00 [0e+00-Inf]     | 1.000    | 1.000   |
| <i>POLG</i>      | 101         | 0         | 0.00%         | 196          | 0         | 0.00%         | 1.00 [0e+00-Inf]     | 1.000    | 1.000   |
| <i>POLI</i>      | 101         | 0         | 0.00%         | 196          | 0         | 0.00%         | 1.00 [0e+00-Inf]     | 1.000    | 1.000   |
| <i>POLR2H</i>    | 101         | 0         | 0.00%         | 196          | 0         | 0.00%         | 1.00 [0e+00-Inf]     | 1.000    | 1.000   |
| <i>POLR2K</i>    | 101         | 0         | 0.00%         | 196          | 0         | 0.00%         | 1.00 [0e+00-Inf]     | 1.000    | 1.000   |
| <i>POLR3C</i>    | 101         | 0         | 0.00%         | 196          | 0         | 0.00%         | 1.00 [0e+00-Inf]     | 1.000    | 1.000   |
| <i>POLR3E</i>    | 101         | 0         | 0.00%         | 196          | 0         | 0.00%         | 1.00 [0e+00-Inf]     | 1.000    | 1.000   |
| <i>POLR3GL</i>   | 101         | 0         | 0.00%         | 196          | 0         | 0.00%         | 1.00 [0e+00-Inf]     | 1.000    | 1.000   |
| <i>POLR3K</i>    | 101         | 0         | 0.00%         | 196          | 0         | 0.00%         | 1.00 [0e+00-Inf]     | 1.000    | 1.000   |
| <i>POM121L8P</i> | 101         | 0         | 0.00%         | 196          | 1         | 0.51%         | 3.2e+07 [0e+00-Inf]  | 0.997    | 1.000   |
| <i>POMP</i>      | 101         | 0         | 0.00%         | 196          | 0         | 0.00%         | 1.00 [0e+00-Inf]     | 1.000    | 1.000   |
| <i>POP1</i>      | 101         | 0         | 0.00%         | 196          | 0         | 0.00%         | 1.00 [0e+00-Inf]     | 1.000    | 1.000   |
| <i>POPDC3</i>    | 101         | 0         | 0.00%         | 196          | 0         | 0.00%         | 1.00 [0e+00-Inf]     | 1.000    | 1.000   |
| <i>POTEA</i>     | 101         | 0         | 0.00%         | 196          | 0         | 0.00%         | 1.00 [0e+00-Inf]     | 1.000    | 1.000   |

| Symbol   | CINSARC Low |           |               | CINSARC High |           |               | CINSARC High vs. Low |          |         |
|----------|-------------|-----------|---------------|--------------|-----------|---------------|----------------------|----------|---------|
|          | N tested    | N altered | Fq alteration | N tested     | N altered | Fq alteration | OR [95%CI]           | p-value* | q-value |
| POTEB    | 101         | 0         | 0.00%         | 196          | 0         | 0.00%         | 1.00 [0e+00-Inf]     | 1.000    | 1.000   |
| POTEG    | 101         | 0         | 0.00%         | 196          | 0         | 0.00%         | 1.00 [0e+00-Inf]     | 1.000    | 1.000   |
| POU2F1   | 101         | 0         | 0.00%         | 196          | 0         | 0.00%         | 1.00 [0e+00-Inf]     | 1.000    | 1.000   |
| POU5F1B  | 101         | 0         | 0.00%         | 196          | 0         | 0.00%         | 1.00 [0e+00-Inf]     | 1.000    | 1.000   |
| PPBPP2   | 101         | 0         | 0.00%         | 196          | 0         | 0.00%         | 1.00 [0e+00-Inf]     | 1.000    | 1.000   |
| PPBP     | 101         | 0         | 0.00%         | 196          | 0         | 0.00%         | 1.00 [0e+00-Inf]     | 1.000    | 1.000   |
| PPDPF    | 101         | 0         | 0.00%         | 196          | 0         | 0.00%         | 1.00 [0e+00-Inf]     | 1.000    | 1.000   |
| PPEF2    | 101         | 0         | 0.00%         | 196          | 0         | 0.00%         | 1.00 [0e+00-Inf]     | 1.000    | 1.000   |
| PPFIA1   | 101         | 0         | 0.00%         | 196          | 0         | 0.00%         | 1.00 [0e+00-Inf]     | 1.000    | 1.000   |
| PPFIA2   | 101         | 0         | 0.00%         | 196          | 0         | 0.00%         | 1.00 [0e+00-Inf]     | 1.000    | 1.000   |
| PPFIA4   | 101         | 0         | 0.00%         | 196          | 0         | 0.00%         | 1.00 [0e+00-Inf]     | 1.000    | 1.000   |
| PPIAL4D  | 101         | 0         | 0.00%         | 196          | 0         | 0.00%         | 1.00 [0e+00-Inf]     | 1.000    | 1.000   |
| PPIAL4E  | 101         | 0         | 0.00%         | 196          | 0         | 0.00%         | 1.00 [0e+00-Inf]     | 1.000    | 1.000   |
| PPL      | 101         | 0         | 0.00%         | 196          | 0         | 0.00%         | 1.00 [0e+00-Inf]     | 1.000    | 1.000   |
| PPM1D    | 101         | 0         | 0.00%         | 196          | 0         | 0.00%         | 1.00 [0e+00-Inf]     | 1.000    | 1.000   |
| PPM1E    | 101         | 0         | 0.00%         | 196          | 0         | 0.00%         | 1.00 [0e+00-Inf]     | 1.000    | 1.000   |
| PPM1H    | 101         | 0         | 0.00%         | 196          | 0         | 0.00%         | 1.00 [0e+00-Inf]     | 1.000    | 1.000   |
| PPME1    | 101         | 0         | 0.00%         | 196          | 0         | 0.00%         | 1.00 [0e+00-Inf]     | 1.000    | 1.000   |
| PPOX     | 101         | 0         | 0.00%         | 196          | 0         | 0.00%         | 1.00 [0e+00-Inf]     | 1.000    | 1.000   |
| PPP1CA   | 101         | 0         | 0.00%         | 196          | 0         | 0.00%         | 1.00 [0e+00-Inf]     | 1.000    | 1.000   |
| PPP1R12A | 101         | 0         | 0.00%         | 196          | 0         | 0.00%         | 1.00 [0e+00-Inf]     | 1.000    | 1.000   |
| PPP1R12B | 101         | 0         | 0.00%         | 196          | 0         | 0.00%         | 1.00 [0e+00-Inf]     | 1.000    | 1.000   |
| PPP1R15B | 101         | 0         | 0.00%         | 196          | 0         | 0.00%         | 1.00 [0e+00-Inf]     | 1.000    | 1.000   |
| PPP1R16A | 101         | 0         | 0.00%         | 196          | 0         | 0.00%         | 1.00 [0e+00-Inf]     | 1.000    | 1.000   |
| PPP1R16B | 101         | 0         | 0.00%         | 196          | 0         | 0.00%         | 1.00 [0e+00-Inf]     | 1.000    | 1.000   |
| PPP1R1B  | 101         | 0         | 0.00%         | 196          | 0         | 0.00%         | 1.00 [0e+00-Inf]     | 1.000    | 1.000   |
| PPP1R2   | 101         | 0         | 0.00%         | 196          | 0         | 0.00%         | 1.00 [0e+00-Inf]     | 1.000    | 1.000   |
| PPP1R3D  | 101         | 0         | 0.00%         | 196          | 0         | 0.00%         | 1.00 [0e+00-Inf]     | 1.000    | 1.000   |
| PPP1R9B  | 101         | 0         | 0.00%         | 196          | 0         | 0.00%         | 1.00 [0e+00-Inf]     | 1.000    | 1.000   |
| PPP2CB   | 101         | 0         | 0.00%         | 196          | 0         | 0.00%         | 1.00 [0e+00-Inf]     | 1.000    | 1.000   |
| PPP2R3B  | 101         | 0         | 0.00%         | 196          | 0         | 0.00%         | 1.00 [0e+00-Inf]     | 1.000    | 1.000   |
| PPP2R3C  | 101         | 0         | 0.00%         | 196          | 0         | 0.00%         | 1.00 [0e+00-Inf]     | 1.000    | 1.000   |
| PPP2R5A  | 101         | 0         | 0.00%         | 196          | 0         | 0.00%         | 1.00 [0e+00-Inf]     | 1.000    | 1.000   |
| PPP3CB   | 101         | 0         | 0.00%         | 196          | 0         | 0.00%         | 1.00 [0e+00-Inf]     | 1.000    | 1.000   |
| PPP4C    | 101         | 0         | 0.00%         | 196          | 0         | 0.00%         | 1.00 [0e+00-Inf]     | 1.000    | 1.000   |
| PPP4R1L  | 101         | 0         | 0.00%         | 196          | 0         | 0.00%         | 1.00 [0e+00-Inf]     | 1.000    | 1.000   |
| DES12    | 101         | 0         | 0.00%         | 196          | 0         | 0.00%         | 1.00 [0e+00-Inf]     | 1.000    | 1.000   |
| PRAC1    | 101         | 0         | 0.00%         | 196          | 0         | 0.00%         | 1.00 [0e+00-Inf]     | 1.000    | 1.000   |
| PRCC     | 101         | 0         | 0.00%         | 196          | 0         | 0.00%         | 1.00 [0e+00-Inf]     | 1.000    | 1.000   |
| PRCD     | 101         | 0         | 0.00%         | 196          | 0         | 0.00%         | 1.00 [0e+00-Inf]     | 1.000    | 1.000   |
| PRCP     | 101         | 0         | 0.00%         | 196          | 0         | 0.00%         | 1.00 [0e+00-Inf]     | 1.000    | 1.000   |
| PRDM14   | 101         | 0         | 0.00%         | 196          | 0         | 0.00%         | 1.00 [0e+00-Inf]     | 1.000    | 1.000   |
| PRDM1    | 101         | 0         | 0.00%         | 196          | 0         | 0.00%         | 1.00 [0e+00-Inf]     | 1.000    | 1.000   |
| PRDX6    | 101         | 0         | 0.00%         | 196          | 0         | 0.00%         | 1.00 [0e+00-Inf]     | 1.000    | 1.000   |
| PRELP    | 101         | 0         | 0.00%         | 196          | 0         | 0.00%         | 1.00 [0e+00-Inf]     | 1.000    | 1.000   |
| PREP     | 101         | 0         | 0.00%         | 196          | 0         | 0.00%         | 1.00 [0e+00-Inf]     | 1.000    | 1.000   |
| PREX1    | 101         | 0         | 0.00%         | 196          | 0         | 0.00%         | 1.00 [0e+00-Inf]     | 1.000    | 1.000   |
| PREX2    | 101         | 0         | 0.00%         | 196          | 0         | 0.00%         | 1.00 [0e+00-Inf]     | 1.000    | 1.000   |
| PRG4     | 101         | 0         | 0.00%         | 196          | 0         | 0.00%         | 1.00 [0e+00-Inf]     | 1.000    | 1.000   |
| HELZ2    | 101         | 0         | 0.00%         | 196          | 0         | 0.00%         | 1.00 [0e+00-Inf]     | 1.000    | 1.000   |
| PRKAB2   | 101         | 0         | 0.00%         | 196          | 0         | 0.00%         | 1.00 [0e+00-Inf]     | 1.000    | 1.000   |
| PRKAR1A  | 101         | 0         | 0.00%         | 196          | 0         | 0.00%         | 1.00 [0e+00-Inf]     | 1.000    | 1.000   |
| PRKCA    | 101         | 0         | 0.00%         | 196          | 0         | 0.00%         | 1.00 [0e+00-Inf]     | 1.000    | 1.000   |
| PRKCB    | 101         | 0         | 0.00%         | 196          | 0         | 0.00%         | 1.00 [0e+00-Inf]     | 1.000    | 1.000   |
| PRKCI    | 101         | 0         | 0.00%         | 196          | 0         | 0.00%         | 1.00 [0e+00-Inf]     | 1.000    | 1.000   |
| PRKD1    | 101         | 0         | 0.00%         | 196          | 0         | 0.00%         | 1.00 [0e+00-Inf]     | 1.000    | 1.000   |
| PRKDC    | 101         | 0         | 0.00%         | 196          | 0         | 0.00%         | 1.00 [0e+00-Inf]     | 1.000    | 1.000   |
| PRKY     | 101         | 64        | 63.37%        | 196          | 116       | 59.18%        | 0.84 [0.55-1.27]     | 0.485    | 1.000   |
| PRM1     | 101         | 0         | 0.00%         | 196          | 0         | 0.00%         | 1.00 [0e+00-Inf]     | 1.000    | 1.000   |
| PRM2     | 101         | 0         | 0.00%         | 196          | 0         | 0.00%         | 1.00 [0e+00-Inf]     | 1.000    | 1.000   |
| PRM3     | 101         | 0         | 0.00%         | 196          | 0         | 0.00%         | 1.00 [0e+00-Inf]     | 1.000    | 1.000   |
| PROCA1   | 101         | 0         | 0.00%         | 196          | 0         | 0.00%         | 1.00 [0e+00-Inf]     | 1.000    | 1.000   |
| PROCR    | 101         | 0         | 0.00%         | 196          | 0         | 0.00%         | 1.00 [0e+00-Inf]     | 1.000    | 1.000   |
| PROX1    | 101         | 0         | 0.00%         | 196          | 0         | 0.00%         | 1.00 [0e+00-Inf]     | 1.000    | 1.000   |
| PRPF3    | 101         | 0         | 0.00%         | 196          | 0         | 0.00%         | 1.00 [0e+00-Inf]     | 1.000    | 1.000   |
| PRPF6    | 101         | 0         | 0.00%         | 196          | 0         | 0.00%         | 1.00 [0e+00-Inf]     | 1.000    | 1.000   |
| PRPSAP1  | 101         | 0         | 0.00%         | 196          | 0         | 0.00%         | 1.00 [0e+00-Inf]     | 1.000    | 1.000   |
| PRR11    | 101         | 0         | 0.00%         | 196          | 0         | 0.00%         | 1.00 [0e+00-Inf]     | 1.000    | 1.000   |
| PRR14    | 101         | 0         | 0.00%         | 196          | 0         | 0.00%         | 1.00 [0e+00-Inf]     | 1.000    | 1.000   |
| PRR15L   | 101         | 0         | 0.00%         | 196          | 0         | 0.00%         | 1.00 [0e+00-Inf]     | 1.000    | 1.000   |
| PRR15    | 101         | 0         | 0.00%         | 196          | 0         | 0.00%         | 1.00 [0e+00-Inf]     | 1.000    | 1.000   |

| Symbol    | CINSARC Low |           |               | CINSARC High |           |               | CINSARC High vs. Low |          |         |
|-----------|-------------|-----------|---------------|--------------|-----------|---------------|----------------------|----------|---------|
|           | N tested    | N altered | Fq alteration | N tested     | N altered | Fq alteration | OR [95%CI]           | p-value* | q-value |
| PRR25     | 101         | 0         | 0.00%         | 196          | 0         | 0.00%         | 1.00 [0e+00-Inf]     | 1.000    | 1.000   |
| PRRT2     | 101         | 0         | 0.00%         | 196          | 0         | 0.00%         | 1.00 [0e+00-Inf]     | 1.000    | 1.000   |
| PRRX1     | 101         | 0         | 0.00%         | 196          | 0         | 0.00%         | 1.00 [0e+00-Inf]     | 1.000    | 1.000   |
| PRSS1     | 101         | 0         | 0.00%         | 196          | 0         | 0.00%         | 1.00 [0e+00-Inf]     | 1.000    | 1.000   |
| PRSS21    | 101         | 0         | 0.00%         | 196          | 0         | 0.00%         | 1.00 [0e+00-Inf]     | 1.000    | 1.000   |
| PRSS22    | 101         | 0         | 0.00%         | 196          | 0         | 0.00%         | 1.00 [0e+00-Inf]     | 1.000    | 1.000   |
| PRSS23    | 101         | 0         | 0.00%         | 196          | 0         | 0.00%         | 1.00 [0e+00-Inf]     | 1.000    | 1.000   |
| PRSS27    | 101         | 0         | 0.00%         | 196          | 0         | 0.00%         | 1.00 [0e+00-Inf]     | 1.000    | 1.000   |
| PRSS30P   | 101         | 0         | 0.00%         | 196          | 0         | 0.00%         | 1.00 [0e+00-Inf]     | 1.000    | 1.000   |
| PRSS33    | 101         | 0         | 0.00%         | 196          | 0         | 0.00%         | 1.00 [0e+00-Inf]     | 1.000    | 1.000   |
| PRSS36    | 101         | 0         | 0.00%         | 196          | 0         | 0.00%         | 1.00 [0e+00-Inf]     | 1.000    | 1.000   |
| PRSS38    | 101         | 0         | 0.00%         | 196          | 0         | 0.00%         | 1.00 [0e+00-Inf]     | 1.000    | 1.000   |
| PRSS41    | 101         | 0         | 0.00%         | 196          | 0         | 0.00%         | 1.00 [0e+00-Inf]     | 1.000    | 1.000   |
| PRSS53    | 101         | 0         | 0.00%         | 196          | 0         | 0.00%         | 1.00 [0e+00-Inf]     | 1.000    | 1.000   |
| PRSS8     | 101         | 0         | 0.00%         | 196          | 0         | 0.00%         | 1.00 [0e+00-Inf]     | 1.000    | 1.000   |
| PRY2      | 101         | 65        | 64.36%        | 196          | 117       | 59.69%        | 0.82 [0.54-1.25]     | 0.435    | 1.000   |
| PSAP      | 101         | 0         | 0.00%         | 196          | 0         | 0.00%         | 1.00 [0e+00-Inf]     | 1.000    | 1.000   |
| PSCA      | 101         | 0         | 0.00%         | 196          | 0         | 0.00%         | 1.00 [0e+00-Inf]     | 1.000    | 1.000   |
| PSEN2     | 101         | 0         | 0.00%         | 196          | 0         | 0.00%         | 1.00 [0e+00-Inf]     | 1.000    | 1.000   |
| PSKH2     | 101         | 0         | 0.00%         | 196          | 0         | 0.00%         | 1.00 [0e+00-Inf]     | 1.000    | 1.000   |
| PSMA6     | 101         | 0         | 0.00%         | 196          | 0         | 0.00%         | 1.00 [0e+00-Inf]     | 1.000    | 1.000   |
| PSMA7     | 101         | 0         | 0.00%         | 196          | 0         | 0.00%         | 1.00 [0e+00-Inf]     | 1.000    | 1.000   |
| PSMB11    | 101         | 0         | 0.00%         | 196          | 0         | 0.00%         | 1.00 [0e+00-Inf]     | 1.000    | 1.000   |
| PSMB3     | 101         | 0         | 0.00%         | 196          | 0         | 0.00%         | 1.00 [0e+00-Inf]     | 1.000    | 1.000   |
| PSMB4     | 101         | 0         | 0.00%         | 196          | 0         | 0.00%         | 1.00 [0e+00-Inf]     | 1.000    | 1.000   |
| PSMB5     | 101         | 0         | 0.00%         | 196          | 0         | 0.00%         | 1.00 [0e+00-Inf]     | 1.000    | 1.000   |
| PSMC5     | 101         | 0         | 0.00%         | 196          | 0         | 0.00%         | 1.00 [0e+00-Inf]     | 1.000    | 1.000   |
| PSMD11    | 101         | 0         | 0.00%         | 196          | 0         | 0.00%         | 1.00 [0e+00-Inf]     | 1.000    | 1.000   |
| PSMD12    | 101         | 0         | 0.00%         | 196          | 0         | 0.00%         | 1.00 [0e+00-Inf]     | 1.000    | 1.000   |
| PSMD2     | 101         | 0         | 0.00%         | 196          | 0         | 0.00%         | 1.00 [0e+00-Inf]     | 1.000    | 1.000   |
| PSMD3     | 101         | 0         | 0.00%         | 196          | 0         | 0.00%         | 1.00 [0e+00-Inf]     | 1.000    | 1.000   |
| PSMD4     | 101         | 0         | 0.00%         | 196          | 0         | 0.00%         | 1.00 [0e+00-Inf]     | 1.000    | 1.000   |
| PTDSS1    | 101         | 0         | 0.00%         | 196          | 0         | 0.00%         | 1.00 [0e+00-Inf]     | 1.000    | 1.000   |
| PTGIS     | 101         | 0         | 0.00%         | 196          | 0         | 0.00%         | 1.00 [0e+00-Inf]     | 1.000    | 1.000   |
| PTGS2     | 101         | 0         | 0.00%         | 196          | 0         | 0.00%         | 1.00 [0e+00-Inf]     | 1.000    | 1.000   |
| PTK2      | 101         | 0         | 0.00%         | 196          | 0         | 0.00%         | 1.00 [0e+00-Inf]     | 1.000    | 1.000   |
| PTK6      | 101         | 0         | 0.00%         | 196          | 0         | 0.00%         | 1.00 [0e+00-Inf]     | 1.000    | 1.000   |
| PTP4A3    | 101         | 0         | 0.00%         | 196          | 0         | 0.00%         | 1.00 [0e+00-Inf]     | 1.000    | 1.000   |
| PTPN14    | 101         | 0         | 0.00%         | 196          | 0         | 0.00%         | 1.00 [0e+00-Inf]     | 1.000    | 1.000   |
| PTPN1     | 101         | 0         | 0.00%         | 196          | 0         | 0.00%         | 1.00 [0e+00-Inf]     | 1.000    | 1.000   |
| PTPN5     | 101         | 0         | 0.00%         | 196          | 0         | 0.00%         | 1.00 [0e+00-Inf]     | 1.000    | 1.000   |
| PTPN7     | 101         | 0         | 0.00%         | 196          | 0         | 0.00%         | 1.00 [0e+00-Inf]     | 1.000    | 1.000   |
| PTPRB     | 101         | 0         | 0.00%         | 196          | 0         | 0.00%         | 1.00 [0e+00-Inf]     | 1.000    | 1.000   |
| PTPRCAP   | 101         | 0         | 0.00%         | 196          | 0         | 0.00%         | 1.00 [0e+00-Inf]     | 1.000    | 1.000   |
| PTPRC     | 101         | 0         | 0.00%         | 196          | 0         | 0.00%         | 1.00 [0e+00-Inf]     | 1.000    | 1.000   |
| PTPRR     | 101         | 0         | 0.00%         | 196          | 0         | 0.00%         | 1.00 [0e+00-Inf]     | 1.000    | 1.000   |
| PTPRT     | 101         | 0         | 0.00%         | 196          | 0         | 0.00%         | 1.00 [0e+00-Inf]     | 1.000    | 1.000   |
| PTPRVP    | 101         | 0         | 0.00%         | 196          | 0         | 0.00%         | 1.00 [0e+00-Inf]     | 1.000    | 1.000   |
| PTRH2     | 101         | 0         | 0.00%         | 196          | 0         | 0.00%         | 1.00 [0e+00-Inf]     | 1.000    | 1.000   |
| PTTG3P    | 101         | 0         | 0.00%         | 196          | 0         | 0.00%         | 1.00 [0e+00-Inf]     | 1.000    | 1.000   |
| PTX4      | 101         | 0         | 0.00%         | 196          | 0         | 0.00%         | 1.00 [0e+00-Inf]     | 1.000    | 1.000   |
| PUF60     | 101         | 0         | 0.00%         | 196          | 0         | 0.00%         | 1.00 [0e+00-Inf]     | 1.000    | 1.000   |
| PURG      | 101         | 0         | 0.00%         | 196          | 0         | 0.00%         | 1.00 [0e+00-Inf]     | 1.000    | 1.000   |
| PVT1      | 101         | 0         | 0.00%         | 196          | 0         | 0.00%         | 1.00 [0e+00-Inf]     | 1.000    | 1.000   |
| PXDNL     | 101         | 0         | 0.00%         | 196          | 0         | 0.00%         | 1.00 [0e+00-Inf]     | 1.000    | 1.000   |
| PYCARD    | 101         | 0         | 0.00%         | 196          | 0         | 0.00%         | 1.00 [0e+00-Inf]     | 1.000    | 1.000   |
| PYCR1     | 101         | 0         | 0.00%         | 196          | 0         | 0.00%         | 1.00 [0e+00-Inf]     | 1.000    | 1.000   |
| PYCR2     | 101         | 0         | 0.00%         | 196          | 0         | 0.00%         | 1.00 [0e+00-Inf]     | 1.000    | 1.000   |
| PYDC1     | 101         | 0         | 0.00%         | 196          | 0         | 0.00%         | 1.00 [0e+00-Inf]     | 1.000    | 1.000   |
| PYDC2     | 101         | 0         | 0.00%         | 196          | 0         | 0.00%         | 1.00 [0e+00-Inf]     | 1.000    | 1.000   |
| PYGO2     | 101         | 0         | 0.00%         | 196          | 0         | 0.00%         | 1.00 [0e+00-Inf]     | 1.000    | 1.000   |
| PYHIN1    | 101         | 0         | 0.00%         | 196          | 0         | 0.00%         | 1.00 [0e+00-Inf]     | 1.000    | 1.000   |
| PYY2      | 101         | 0         | 0.00%         | 196          | 0         | 0.00%         | 1.00 [0e+00-Inf]     | 1.000    | 1.000   |
| QPRT      | 101         | 0         | 0.00%         | 196          | 0         | 0.00%         | 1.00 [0e+00-Inf]     | 1.000    | 1.000   |
| QRICH2    | 101         | 0         | 0.00%         | 196          | 0         | 0.00%         | 1.00 [0e+00-Inf]     | 1.000    | 1.000   |
| QRSL1     | 101         | 0         | 0.00%         | 196          | 0         | 0.00%         | 1.00 [0e+00-Inf]     | 1.000    | 1.000   |
| QSER1     | 101         | 0         | 0.00%         | 196          | 0         | 0.00%         | 1.00 [0e+00-Inf]     | 1.000    | 1.000   |
| QSOX1     | 101         | 0         | 0.00%         | 196          | 0         | 0.00%         | 1.00 [0e+00-Inf]     | 1.000    | 1.000   |
| R3HDML    | 101         | 0         | 0.00%         | 196          | 0         | 0.00%         | 1.00 [0e+00-Inf]     | 1.000    | 1.000   |
| RAB11FIP1 | 101         | 0         | 0.00%         | 196          | 0         | 0.00%         | 1.00 [0e+00-Inf]     | 1.000    | 1.000   |
| RAB11FIP3 | 101         | 0         | 0.00%         | 196          | 0         | 0.00%         | 1.00 [0e+00-Inf]     | 1.000    | 1.000   |

| Symbol   | CINSARC Low |           |               | CINSARC High |           |               | CINSARC High vs. Low |          |         |
|----------|-------------|-----------|---------------|--------------|-----------|---------------|----------------------|----------|---------|
|          | N tested    | N altered | Fq alteration | N tested     | N altered | Fq alteration | OR [95%CI]           | p-value* | q-value |
| RAB13    | 101         | 0         | 0.00%         | 196          | 0         | 0.00%         | 1.00 [0e+00-Inf]     | 1.000    | 1.000   |
| RAB19    | 101         | 0         | 0.00%         | 196          | 0         | 0.00%         | 1.00 [0e+00-Inf]     | 1.000    | 1.000   |
| RAB1B    | 101         | 0         | 0.00%         | 196          | 0         | 0.00%         | 1.00 [0e+00-Inf]     | 1.000    | 1.000   |
| RAB21    | 101         | 0         | 0.00%         | 196          | 0         | 0.00%         | 1.00 [0e+00-Inf]     | 1.000    | 1.000   |
| RAB22A   | 101         | 0         | 0.00%         | 196          | 0         | 0.00%         | 1.00 [0e+00-Inf]     | 1.000    | 1.000   |
| RAB25    | 101         | 0         | 0.00%         | 196          | 0         | 0.00%         | 1.00 [0e+00-Inf]     | 1.000    | 1.000   |
| RAB26    | 101         | 0         | 0.00%         | 196          | 0         | 0.00%         | 1.00 [0e+00-Inf]     | 1.000    | 1.000   |
| RAB27B   | 101         | 0         | 0.00%         | 196          | 0         | 0.00%         | 1.00 [0e+00-Inf]     | 1.000    | 1.000   |
| RAB2A    | 101         | 0         | 0.00%         | 196          | 0         | 0.00%         | 1.00 [0e+00-Inf]     | 1.000    | 1.000   |
| RAB30    | 101         | 0         | 0.00%         | 196          | 0         | 0.00%         | 1.00 [0e+00-Inf]     | 1.000    | 1.000   |
| RAB34    | 101         | 0         | 0.00%         | 196          | 0         | 0.00%         | 1.00 [0e+00-Inf]     | 1.000    | 1.000   |
| RAB37    | 101         | 0         | 0.00%         | 196          | 0         | 0.00%         | 1.00 [0e+00-Inf]     | 1.000    | 1.000   |
| RAB38    | 101         | 0         | 0.00%         | 196          | 0         | 0.00%         | 1.00 [0e+00-Inf]     | 1.000    | 1.000   |
| RAB3GAP2 | 101         | 0         | 0.00%         | 196          | 0         | 0.00%         | 1.00 [0e+00-Inf]     | 1.000    | 1.000   |
| RAB3IP   | 101         | 0         | 0.00%         | 196          | 0         | 0.00%         | 1.00 [0e+00-Inf]     | 1.000    | 1.000   |
| RAB40B   | 101         | 0         | 0.00%         | 196          | 0         | 0.00%         | 1.00 [0e+00-Inf]     | 1.000    | 1.000   |
| RAB40C   | 101         | 0         | 0.00%         | 196          | 0         | 0.00%         | 1.00 [0e+00-Inf]     | 1.000    | 1.000   |
| RAB4A    | 101         | 0         | 0.00%         | 196          | 0         | 0.00%         | 1.00 [0e+00-Inf]     | 1.000    | 1.000   |
| RAB6A    | 101         | 0         | 0.00%         | 196          | 0         | 0.00%         | 1.00 [0e+00-Inf]     | 1.000    | 1.000   |
| RABEP2   | 101         | 0         | 0.00%         | 196          | 0         | 0.00%         | 1.00 [0e+00-Inf]     | 1.000    | 1.000   |
| RABGAP1L | 101         | 0         | 0.00%         | 196          | 0         | 0.00%         | 1.00 [0e+00-Inf]     | 1.000    | 1.000   |
| RABIF    | 101         | 0         | 0.00%         | 196          | 0         | 0.00%         | 1.00 [0e+00-Inf]     | 1.000    | 1.000   |
| RAC3     | 101         | 0         | 0.00%         | 196          | 0         | 0.00%         | 1.00 [0e+00-Inf]     | 1.000    | 1.000   |
| RAD21    | 101         | 0         | 0.00%         | 196          | 0         | 0.00%         | 1.00 [0e+00-Inf]     | 1.000    | 1.000   |
| RAD51C   | 101         | 0         | 0.00%         | 196          | 0         | 0.00%         | 1.00 [0e+00-Inf]     | 1.000    | 1.000   |
| RAD51D   | 101         | 0         | 0.00%         | 196          | 0         | 0.00%         | 1.00 [0e+00-Inf]     | 1.000    | 1.000   |
| RAD54B   | 101         | 0         | 0.00%         | 196          | 0         | 0.00%         | 1.00 [0e+00-Inf]     | 1.000    | 1.000   |
| RAD9A    | 101         | 0         | 0.00%         | 196          | 0         | 0.00%         | 1.00 [0e+00-Inf]     | 1.000    | 1.000   |
| RAE1     | 101         | 0         | 0.00%         | 196          | 0         | 0.00%         | 1.00 [0e+00-Inf]     | 1.000    | 1.000   |
| SLC50A1  | 101         | 0         | 0.00%         | 196          | 0         | 0.00%         | 1.00 [0e+00-Inf]     | 1.000    | 1.000   |
| RALA     | 101         | 0         | 0.00%         | 196          | 0         | 0.00%         | 1.00 [0e+00-Inf]     | 1.000    | 1.000   |
| RALGAPA1 | 101         | 0         | 0.00%         | 196          | 0         | 0.00%         | 1.00 [0e+00-Inf]     | 1.000    | 1.000   |
| RALGAPB  | 101         | 0         | 0.00%         | 196          | 0         | 0.00%         | 1.00 [0e+00-Inf]     | 1.000    | 1.000   |
| RALGPS2  | 101         | 0         | 0.00%         | 196          | 0         | 0.00%         | 1.00 [0e+00-Inf]     | 1.000    | 1.000   |
| RALYL    | 101         | 0         | 0.00%         | 196          | 0         | 0.00%         | 1.00 [0e+00-Inf]     | 1.000    | 1.000   |
| RAP1B    | 101         | 0         | 0.00%         | 196          | 0         | 0.00%         | 1.00 [0e+00-Inf]     | 1.000    | 1.000   |
| RAPGEF5  | 101         | 0         | 0.00%         | 196          | 0         | 0.00%         | 1.00 [0e+00-Inf]     | 1.000    | 1.000   |
| RAPGEFL1 | 101         | 0         | 0.00%         | 196          | 0         | 0.00%         | 1.00 [0e+00-Inf]     | 1.000    | 1.000   |
| RARA     | 101         | 0         | 0.00%         | 196          | 0         | 0.00%         | 1.00 [0e+00-Inf]     | 1.000    | 1.000   |
| RASAL2   | 101         | 0         | 0.00%         | 196          | 0         | 0.00%         | 1.00 [0e+00-Inf]     | 1.000    | 1.000   |
| RASL10B  | 101         | 0         | 0.00%         | 196          | 0         | 0.00%         | 1.00 [0e+00-Inf]     | 1.000    | 1.000   |
| RASSF3   | 101         | 0         | 0.00%         | 196          | 0         | 0.00%         | 1.00 [0e+00-Inf]     | 1.000    | 1.000   |
| RASSF5   | 101         | 0         | 0.00%         | 196          | 0         | 0.00%         | 1.00 [0e+00-Inf]     | 1.000    | 1.000   |
| RASSF6   | 101         | 0         | 0.00%         | 196          | 0         | 0.00%         | 1.00 [0e+00-Inf]     | 1.000    | 1.000   |
| RAX      | 101         | 0         | 0.00%         | 196          | 0         | 0.00%         | 1.00 [0e+00-Inf]     | 1.000    | 1.000   |
| RB1CC1   | 101         | 0         | 0.00%         | 196          | 0         | 0.00%         | 1.00 [0e+00-Inf]     | 1.000    | 1.000   |
| RBBP5    | 101         | 0         | 0.00%         | 196          | 0         | 0.00%         | 1.00 [0e+00-Inf]     | 1.000    | 1.000   |
| RBBP6    | 101         | 0         | 0.00%         | 196          | 0         | 0.00%         | 1.00 [0e+00-Inf]     | 1.000    | 1.000   |
| RBL1     | 101         | 0         | 0.00%         | 196          | 0         | 0.00%         | 1.00 [0e+00-Inf]     | 1.000    | 1.000   |
| RBM12B   | 101         | 0         | 0.00%         | 196          | 0         | 0.00%         | 1.00 [0e+00-Inf]     | 1.000    | 1.000   |
| RBM12    | 101         | 0         | 0.00%         | 196          | 0         | 0.00%         | 1.00 [0e+00-Inf]     | 1.000    | 1.000   |
| RBM14    | 101         | 0         | 0.00%         | 196          | 0         | 0.00%         | 1.00 [0e+00-Inf]     | 1.000    | 1.000   |
| RBM34    | 101         | 0         | 0.00%         | 196          | 0         | 0.00%         | 1.00 [0e+00-Inf]     | 1.000    | 1.000   |
| RBM38    | 101         | 0         | 0.00%         | 196          | 0         | 0.00%         | 1.00 [0e+00-Inf]     | 1.000    | 1.000   |
| RBM39    | 101         | 0         | 0.00%         | 196          | 0         | 0.00%         | 1.00 [0e+00-Inf]     | 1.000    | 1.000   |
| RBM4B    | 101         | 0         | 0.00%         | 196          | 0         | 0.00%         | 1.00 [0e+00-Inf]     | 1.000    | 1.000   |
| RBM4     | 101         | 0         | 0.00%         | 196          | 0         | 0.00%         | 1.00 [0e+00-Inf]     | 1.000    | 1.000   |
| RBM8A    | 101         | 0         | 0.00%         | 196          | 0         | 0.00%         | 1.00 [0e+00-Inf]     | 1.000    | 1.000   |
| RBM1A1   | 101         | 52        | 51.49%        | 196          | 98        | 50.00%        | 0.94 [0.63-1.41]     | 0.808    | 1.000   |
| RBM1A3P  | 101         | 64        | 63.37%        | 196          | 116       | 59.18%        | 0.84 [0.55-1.27]     | 0.485    | 1.000   |
| RBM1B    | 101         | 52        | 51.49%        | 196          | 98        | 50.00%        | 0.94 [0.63-1.41]     | 0.808    | 1.000   |
| RBM1E    | 101         | 52        | 51.49%        | 196          | 98        | 50.00%        | 0.94 [0.63-1.41]     | 0.808    | 1.000   |
| RBM1F    | 101         | 65        | 64.36%        | 196          | 117       | 59.69%        | 0.82 [0.54-1.25]     | 0.435    | 1.000   |
| RBM1J    | 101         | 65        | 64.36%        | 196          | 117       | 59.69%        | 0.82 [0.54-1.25]     | 0.435    | 1.000   |
| RBM2EP   | 101         | 64        | 63.37%        | 196          | 116       | 59.18%        | 0.84 [0.55-1.27]     | 0.485    | 1.000   |
| RBM2FP   | 101         | 65        | 64.36%        | 196          | 117       | 59.69%        | 0.82 [0.54-1.25]     | 0.435    | 1.000   |
| RBM3AP   | 101         | 64        | 63.37%        | 196          | 115       | 58.67%        | 0.82 [0.54-1.24]     | 0.434    | 1.000   |
| RBPJL    | 101         | 0         | 0.00%         | 196          | 0         | 0.00%         | 1.00 [0e+00-Inf]     | 1.000    | 1.000   |
| RC3H1    | 101         | 0         | 0.00%         | 196          | 0         | 0.00%         | 1.00 [0e+00-Inf]     | 1.000    | 1.000   |
| RCE1     | 101         | 0         | 0.00%         | 196          | 0         | 0.00%         | 1.00 [0e+00-Inf]     | 1.000    | 1.000   |
| RCHY1    | 101         | 0         | 0.00%         | 196          | 0         | 0.00%         | 1.00 [0e+00-Inf]     | 1.000    | 1.000   |





| Symbol   | CINSARC Low |           |               | CINSARC High |           |               | CINSARC High vs. Low |          |         |
|----------|-------------|-----------|---------------|--------------|-----------|---------------|----------------------|----------|---------|
|          | N tested    | N altered | Fq alteration | N tested     | N altered | Fq alteration | OR [95%CI]           | p-value* | q-value |
| ROMO1    | 101         | 0         | 0.00%         | 196          | 0         | 0.00%         | 1.00 [0e+00-Inf]     | 1.000    | 1.000   |
| RORC     | 101         | 0         | 0.00%         | 196          | 0         | 0.00%         | 1.00 [0e+00-Inf]     | 1.000    | 1.000   |
| RP1L1    | 101         | 1         | 0.99%         | 196          | 0         | 0.00%         | 1.6e-08 [0e+00-Inf]  | 0.996    | 1.000   |
| RP1      | 101         | 0         | 0.00%         | 196          | 0         | 0.00%         | 1.00 [0e+00-Inf]     | 1.000    | 1.000   |
| RP9P     | 101         | 0         | 0.00%         | 196          | 0         | 0.00%         | 1.00 [0e+00-Inf]     | 1.000    | 1.000   |
| RP9      | 101         | 0         | 0.00%         | 196          | 0         | 0.00%         | 1.00 [0e+00-Inf]     | 1.000    | 1.000   |
| RPL19    | 101         | 0         | 0.00%         | 196          | 0         | 0.00%         | 1.00 [0e+00-Inf]     | 1.000    | 1.000   |
| RPL23A   | 101         | 0         | 0.00%         | 196          | 0         | 0.00%         | 1.00 [0e+00-Inf]     | 1.000    | 1.000   |
| RPL23P8  | 101         | 0         | 0.00%         | 196          | 0         | 0.00%         | 1.00 [0e+00-Inf]     | 1.000    | 1.000   |
| RPL23    | 101         | 0         | 0.00%         | 196          | 0         | 0.00%         | 1.00 [0e+00-Inf]     | 1.000    | 1.000   |
| RPL28    | 101         | 0         | 0.00%         | 196          | 0         | 0.00%         | 1.00 [0e+00-Inf]     | 1.000    | 1.000   |
| RPL30    | 101         | 0         | 0.00%         | 196          | 0         | 0.00%         | 1.00 [0e+00-Inf]     | 1.000    | 1.000   |
| RPL31P11 | 101         | 0         | 0.00%         | 196          | 0         | 0.00%         | 1.00 [0e+00-Inf]     | 1.000    | 1.000   |
| RPL35A   | 101         | 0         | 0.00%         | 196          | 0         | 0.00%         | 1.00 [0e+00-Inf]     | 1.000    | 1.000   |
| RPL38    | 101         | 0         | 0.00%         | 196          | 0         | 0.00%         | 1.00 [0e+00-Inf]     | 1.000    | 1.000   |
| RPL3L    | 101         | 0         | 0.00%         | 196          | 0         | 0.00%         | 1.00 [0e+00-Inf]     | 1.000    | 1.000   |
| RPL7     | 101         | 0         | 0.00%         | 196          | 0         | 0.00%         | 1.00 [0e+00-Inf]     | 1.000    | 1.000   |
| RPL8     | 101         | 0         | 0.00%         | 196          | 0         | 0.00%         | 1.00 [0e+00-Inf]     | 1.000    | 1.000   |
| RPLPOP2  | 101         | 0         | 0.00%         | 196          | 0         | 0.00%         | 1.00 [0e+00-Inf]     | 1.000    | 1.000   |
| RPN2     | 101         | 0         | 0.00%         | 196          | 0         | 0.00%         | 1.00 [0e+00-Inf]     | 1.000    | 1.000   |
| RPRD1B   | 101         | 0         | 0.00%         | 196          | 0         | 0.00%         | 1.00 [0e+00-Inf]     | 1.000    | 1.000   |
| RPRD2    | 101         | 0         | 0.00%         | 196          | 0         | 0.00%         | 1.00 [0e+00-Inf]     | 1.000    | 1.000   |
| RPRML    | 101         | 0         | 0.00%         | 196          | 0         | 0.00%         | 1.00 [0e+00-Inf]     | 1.000    | 1.000   |
| RPS10P7  | 101         | 0         | 0.00%         | 196          | 0         | 0.00%         | 1.00 [0e+00-Inf]     | 1.000    | 1.000   |
| RPS15A   | 101         | 0         | 0.00%         | 196          | 0         | 0.00%         | 1.00 [0e+00-Inf]     | 1.000    | 1.000   |
| RPS17    | 101         | 0         | 0.00%         | 196          | 0         | 0.00%         | 1.00 [0e+00-Inf]     | 1.000    | 1.000   |
| RPS20    | 101         | 0         | 0.00%         | 196          | 0         | 0.00%         | 1.00 [0e+00-Inf]     | 1.000    | 1.000   |
| RPS21    | 101         | 0         | 0.00%         | 196          | 0         | 0.00%         | 1.00 [0e+00-Inf]     | 1.000    | 1.000   |
| RPS27    | 101         | 0         | 0.00%         | 196          | 0         | 0.00%         | 1.00 [0e+00-Inf]     | 1.000    | 1.000   |
| RPS2P32  | 101         | 0         | 0.00%         | 196          | 0         | 0.00%         | 1.00 [0e+00-Inf]     | 1.000    | 1.000   |
| RPS2     | 101         | 0         | 0.00%         | 196          | 0         | 0.00%         | 1.00 [0e+00-Inf]     | 1.000    | 1.000   |
| RPS3     | 101         | 0         | 0.00%         | 196          | 0         | 0.00%         | 1.00 [0e+00-Inf]     | 1.000    | 1.000   |
| RPS4Y1   | 101         | 62        | 61.39%        | 196          | 108       | 55.10%        | 0.77 [0.51-1.16]     | 0.300    | 1.000   |
| RPS4Y2   | 101         | 64        | 63.37%        | 196          | 116       | 59.18%        | 0.84 [0.55-1.27]     | 0.485    | 1.000   |
| RPS6KB1  | 101         | 0         | 0.00%         | 196          | 0         | 0.00%         | 1.00 [0e+00-Inf]     | 1.000    | 1.000   |
| RPS6KB2  | 101         | 0         | 0.00%         | 196          | 0         | 0.00%         | 1.00 [0e+00-Inf]     | 1.000    | 1.000   |
| RPS6KC1  | 101         | 0         | 0.00%         | 196          | 0         | 0.00%         | 1.00 [0e+00-Inf]     | 1.000    | 1.000   |
| RPSAP52  | 101         | 0         | 0.00%         | 196          | 1         | 0.51%         | 3.2e+07 [0e+00-Inf]  | 0.997    | 1.000   |
| RPTN     | 101         | 0         | 0.00%         | 196          | 0         | 0.00%         | 1.00 [0e+00-Inf]     | 1.000    | 1.000   |
| RPTOR    | 101         | 0         | 0.00%         | 196          | 0         | 0.00%         | 1.00 [0e+00-Inf]     | 1.000    | 1.000   |
| RPUSD1   | 101         | 0         | 0.00%         | 196          | 0         | 0.00%         | 1.00 [0e+00-Inf]     | 1.000    | 1.000   |
| RRM2B    | 101         | 0         | 0.00%         | 196          | 0         | 0.00%         | 1.00 [0e+00-Inf]     | 1.000    | 1.000   |
| RRN3P1   | 101         | 0         | 0.00%         | 196          | 0         | 0.00%         | 1.00 [0e+00-Inf]     | 1.000    | 1.000   |
| RRN3P2   | 101         | 0         | 0.00%         | 196          | 0         | 0.00%         | 1.00 [0e+00-Inf]     | 1.000    | 1.000   |
| RRN3P3   | 101         | 0         | 0.00%         | 196          | 0         | 0.00%         | 1.00 [0e+00-Inf]     | 1.000    | 1.000   |
| RRN3     | 101         | 0         | 0.00%         | 196          | 0         | 0.00%         | 1.00 [0e+00-Inf]     | 1.000    | 1.000   |
| RRP15    | 101         | 0         | 0.00%         | 196          | 0         | 0.00%         | 1.00 [0e+00-Inf]     | 1.000    | 1.000   |
| RRS1     | 101         | 0         | 0.00%         | 196          | 0         | 0.00%         | 1.00 [0e+00-Inf]     | 1.000    | 1.000   |
| RSAD1    | 101         | 0         | 0.00%         | 196          | 0         | 0.00%         | 1.00 [0e+00-Inf]     | 1.000    | 1.000   |
| RSF1     | 101         | 0         | 0.00%         | 196          | 0         | 0.00%         | 1.00 [0e+00-Inf]     | 1.000    | 1.000   |
| RSL1D1   | 101         | 0         | 0.00%         | 196          | 0         | 0.00%         | 1.00 [0e+00-Inf]     | 1.000    | 1.000   |
| RSP02    | 101         | 0         | 0.00%         | 196          | 0         | 0.00%         | 1.00 [0e+00-Inf]     | 1.000    | 1.000   |
| RTEL1    | 101         | 0         | 0.00%         | 196          | 0         | 0.00%         | 1.00 [0e+00-Inf]     | 1.000    | 1.000   |
| RTN4IP1  | 101         | 0         | 0.00%         | 196          | 0         | 0.00%         | 1.00 [0e+00-Inf]     | 1.000    | 1.000   |
| SNX29    | 101         | 0         | 0.00%         | 196          | 0         | 0.00%         | 1.00 [0e+00-Inf]     | 1.000    | 1.000   |
| SNX29P2  | 101         | 0         | 0.00%         | 196          | 0         | 0.00%         | 1.00 [0e+00-Inf]     | 1.000    | 1.000   |
| RUNX1T1  | 101         | 0         | 0.00%         | 196          | 0         | 0.00%         | 1.00 [0e+00-Inf]     | 1.000    | 1.000   |
| RUSC1    | 101         | 0         | 0.00%         | 196          | 0         | 0.00%         | 1.00 [0e+00-Inf]     | 1.000    | 1.000   |
| RXFP4    | 101         | 0         | 0.00%         | 196          | 0         | 0.00%         | 1.00 [0e+00-Inf]     | 1.000    | 1.000   |
| RXRG     | 101         | 0         | 0.00%         | 196          | 0         | 0.00%         | 1.00 [0e+00-Inf]     | 1.000    | 1.000   |
| RYR2     | 101         | 0         | 0.00%         | 196          | 0         | 0.00%         | 1.00 [0e+00-Inf]     | 1.000    | 1.000   |
| S100A10  | 101         | 0         | 0.00%         | 196          | 0         | 0.00%         | 1.00 [0e+00-Inf]     | 1.000    | 1.000   |
| S100A11  | 101         | 0         | 0.00%         | 196          | 0         | 0.00%         | 1.00 [0e+00-Inf]     | 1.000    | 1.000   |
| S100A12  | 101         | 0         | 0.00%         | 196          | 0         | 0.00%         | 1.00 [0e+00-Inf]     | 1.000    | 1.000   |
| S100A13  | 101         | 0         | 0.00%         | 196          | 0         | 0.00%         | 1.00 [0e+00-Inf]     | 1.000    | 1.000   |
| S100A14  | 101         | 0         | 0.00%         | 196          | 0         | 0.00%         | 1.00 [0e+00-Inf]     | 1.000    | 1.000   |
| S100A16  | 101         | 0         | 0.00%         | 196          | 0         | 0.00%         | 1.00 [0e+00-Inf]     | 1.000    | 1.000   |
| S100A1   | 101         | 0         | 0.00%         | 196          | 0         | 0.00%         | 1.00 [0e+00-Inf]     | 1.000    | 1.000   |
| S100A2   | 101         | 0         | 0.00%         | 196          | 0         | 0.00%         | 1.00 [0e+00-Inf]     | 1.000    | 1.000   |
| S100A3   | 101         | 0         | 0.00%         | 196          | 0         | 0.00%         | 1.00 [0e+00-Inf]     | 1.000    | 1.000   |
| S100A4   | 101         | 0         | 0.00%         | 196          | 0         | 0.00%         | 1.00 [0e+00-Inf]     | 1.000    | 1.000   |

| Symbol          | CINSARC Low |           |               | CINSARC High |           |               | CINSARC High vs. Low |          |         |
|-----------------|-------------|-----------|---------------|--------------|-----------|---------------|----------------------|----------|---------|
|                 | N tested    | N altered | Fq alteration | N tested     | N altered | Fq alteration | OR [95%CI]           | p-value* | q-value |
| <i>S100A5</i>   | 101         | 0         | 0.00%         | 196          | 0         | 0.00%         | 1.00 [0e+00-Inf]     | 1.000    | 1.000   |
| <i>S100A6</i>   | 101         | 0         | 0.00%         | 196          | 0         | 0.00%         | 1.00 [0e+00-Inf]     | 1.000    | 1.000   |
| <i>S100A7A</i>  | 101         | 0         | 0.00%         | 196          | 0         | 0.00%         | 1.00 [0e+00-Inf]     | 1.000    | 1.000   |
| <i>S100A7L2</i> | 101         | 0         | 0.00%         | 196          | 0         | 0.00%         | 1.00 [0e+00-Inf]     | 1.000    | 1.000   |
| <i>S100A7</i>   | 101         | 0         | 0.00%         | 196          | 0         | 0.00%         | 1.00 [0e+00-Inf]     | 1.000    | 1.000   |
| <i>S100A8</i>   | 101         | 0         | 0.00%         | 196          | 0         | 0.00%         | 1.00 [0e+00-Inf]     | 1.000    | 1.000   |
| <i>S100A9</i>   | 101         | 0         | 0.00%         | 196          | 0         | 0.00%         | 1.00 [0e+00-Inf]     | 1.000    | 1.000   |
| <i>SALL4</i>    | 101         | 0         | 0.00%         | 196          | 0         | 0.00%         | 1.00 [0e+00-Inf]     | 1.000    | 1.000   |
| <i>SAMD10</i>   | 101         | 0         | 0.00%         | 196          | 0         | 0.00%         | 1.00 [0e+00-Inf]     | 1.000    | 1.000   |
| <i>SAMD12</i>   | 101         | 0         | 0.00%         | 196          | 0         | 0.00%         | 1.00 [0e+00-Inf]     | 1.000    | 1.000   |
| <i>SAMD14</i>   | 101         | 0         | 0.00%         | 196          | 0         | 0.00%         | 1.00 [0e+00-Inf]     | 1.000    | 1.000   |
| <i>SAMD8</i>    | 101         | 0         | 0.00%         | 196          | 0         | 0.00%         | 1.00 [0e+00-Inf]     | 1.000    | 1.000   |
| <i>SAMHD1</i>   | 101         | 0         | 0.00%         | 196          | 0         | 0.00%         | 1.00 [0e+00-Inf]     | 1.000    | 1.000   |
| <i>SAP30BP</i>  | 101         | 0         | 0.00%         | 196          | 0         | 0.00%         | 1.00 [0e+00-Inf]     | 1.000    | 1.000   |
| <i>PPP6R3</i>   | 101         | 0         | 0.00%         | 196          | 0         | 0.00%         | 1.00 [0e+00-Inf]     | 1.000    | 1.000   |
| <i>SARM1</i>    | 101         | 0         | 0.00%         | 196          | 0         | 0.00%         | 1.00 [0e+00-Inf]     | 1.000    | 1.000   |
| <i>SBF1P1</i>   | 101         | 0         | 0.00%         | 196          | 0         | 0.00%         | 1.00 [0e+00-Inf]     | 1.000    | 1.000   |
| <i>SBK1</i>     | 101         | 0         | 0.00%         | 196          | 0         | 0.00%         | 1.00 [0e+00-Inf]     | 1.000    | 1.000   |
| <i>SBK2</i>     | 101         | 0         | 0.00%         | 196          | 0         | 0.00%         | 1.00 [0e+00-Inf]     | 1.000    | 1.000   |
| <i>SCAMP3</i>   | 101         | 0         | 0.00%         | 196          | 0         | 0.00%         | 1.00 [0e+00-Inf]     | 1.000    | 1.000   |
| <i>SCAND1</i>   | 101         | 0         | 0.00%         | 196          | 0         | 0.00%         | 1.00 [0e+00-Inf]     | 1.000    | 1.000   |
| <i>SCAND2P</i>  | 101         | 0         | 0.00%         | 196          | 0         | 0.00%         | 1.00 [0e+00-Inf]     | 1.000    | 1.000   |
| <i>SCARB2</i>   | 101         | 0         | 0.00%         | 196          | 0         | 0.00%         | 1.00 [0e+00-Inf]     | 1.000    | 1.000   |
| <i>SCARNA15</i> | 101         | 0         | 0.00%         | 196          | 0         | 0.00%         | 1.00 [0e+00-Inf]     | 1.000    | 1.000   |
| <i>SCARNA16</i> | 101         | 0         | 0.00%         | 196          | 0         | 0.00%         | 1.00 [0e+00-Inf]     | 1.000    | 1.000   |
| <i>SCARNA20</i> | 101         | 0         | 0.00%         | 196          | 0         | 0.00%         | 1.00 [0e+00-Inf]     | 1.000    | 1.000   |
| <i>SCARNA3</i>  | 101         | 0         | 0.00%         | 196          | 0         | 0.00%         | 1.00 [0e+00-Inf]     | 1.000    | 1.000   |
| <i>SCARNA4</i>  | 101         | 0         | 0.00%         | 196          | 0         | 0.00%         | 1.00 [0e+00-Inf]     | 1.000    | 1.000   |
| <i>SCCPDH</i>   | 101         | 0         | 0.00%         | 196          | 0         | 0.00%         | 1.00 [0e+00-Inf]     | 1.000    | 1.000   |
| <i>SCFD1</i>    | 101         | 0         | 0.00%         | 196          | 0         | 0.00%         | 1.00 [0e+00-Inf]     | 1.000    | 1.000   |
| <i>SCML4</i>    | 101         | 0         | 0.00%         | 196          | 0         | 0.00%         | 1.00 [0e+00-Inf]     | 1.000    | 1.000   |
| <i>SCN4A</i>    | 101         | 0         | 0.00%         | 196          | 0         | 0.00%         | 1.00 [0e+00-Inf]     | 1.000    | 1.000   |
| <i>SCNM1</i>    | 101         | 0         | 0.00%         | 196          | 0         | 0.00%         | 1.00 [0e+00-Inf]     | 1.000    | 1.000   |
| <i>SCNN1B</i>   | 101         | 0         | 0.00%         | 196          | 0         | 0.00%         | 1.00 [0e+00-Inf]     | 1.000    | 1.000   |
| <i>SCNN1G</i>   | 101         | 0         | 0.00%         | 196          | 0         | 0.00%         | 1.00 [0e+00-Inf]     | 1.000    | 1.000   |
| <i>SCPEP1</i>   | 101         | 0         | 0.00%         | 196          | 0         | 0.00%         | 1.00 [0e+00-Inf]     | 1.000    | 1.000   |
| <i>SCRIB</i>    | 101         | 0         | 0.00%         | 196          | 0         | 0.00%         | 1.00 [0e+00-Inf]     | 1.000    | 1.000   |
| <i>SCRN1</i>    | 101         | 0         | 0.00%         | 196          | 0         | 0.00%         | 1.00 [0e+00-Inf]     | 1.000    | 1.000   |
| <i>SCRN2</i>    | 101         | 0         | 0.00%         | 196          | 0         | 0.00%         | 1.00 [0e+00-Inf]     | 1.000    | 1.000   |
| <i>SCRT1</i>    | 101         | 0         | 0.00%         | 196          | 0         | 0.00%         | 1.00 [0e+00-Inf]     | 1.000    | 1.000   |
| <i>SCYL3</i>    | 101         | 0         | 0.00%         | 196          | 0         | 0.00%         | 1.00 [0e+00-Inf]     | 1.000    | 1.000   |
| <i>SDAD1</i>    | 101         | 0         | 0.00%         | 196          | 0         | 0.00%         | 1.00 [0e+00-Inf]     | 1.000    | 1.000   |
| <i>SDC2</i>     | 101         | 0         | 0.00%         | 196          | 0         | 0.00%         | 1.00 [0e+00-Inf]     | 1.000    | 1.000   |
| <i>SDC4</i>     | 101         | 0         | 0.00%         | 196          | 0         | 0.00%         | 1.00 [0e+00-Inf]     | 1.000    | 1.000   |
| <i>SDCBP</i>    | 101         | 0         | 0.00%         | 196          | 0         | 0.00%         | 1.00 [0e+00-Inf]     | 1.000    | 1.000   |
| <i>SDCCAG8</i>  | 101         | 0         | 0.00%         | 196          | 0         | 0.00%         | 1.00 [0e+00-Inf]     | 1.000    | 1.000   |
| <i>SDF2</i>     | 101         | 0         | 0.00%         | 196          | 0         | 0.00%         | 1.00 [0e+00-Inf]     | 1.000    | 1.000   |
| <i>SDHAF2</i>   | 101         | 0         | 0.00%         | 196          | 0         | 0.00%         | 1.00 [0e+00-Inf]     | 1.000    | 1.000   |
| <i>SDHAP1</i>   | 101         | 0         | 0.00%         | 196          | 0         | 0.00%         | 1.00 [0e+00-Inf]     | 1.000    | 1.000   |
| <i>SDHAP2</i>   | 101         | 0         | 0.00%         | 196          | 0         | 0.00%         | 1.00 [0e+00-Inf]     | 1.000    | 1.000   |
| <i>SDHC</i>     | 101         | 0         | 0.00%         | 196          | 0         | 0.00%         | 1.00 [0e+00-Inf]     | 1.000    | 1.000   |
| <i>SDK2</i>     | 101         | 0         | 0.00%         | 196          | 0         | 0.00%         | 1.00 [0e+00-Inf]     | 1.000    | 1.000   |
| <i>SDR16C5</i>  | 101         | 0         | 0.00%         | 196          | 0         | 0.00%         | 1.00 [0e+00-Inf]     | 1.000    | 1.000   |
| <i>SEBOX</i>    | 101         | 0         | 0.00%         | 196          | 0         | 0.00%         | 1.00 [0e+00-Inf]     | 1.000    | 1.000   |
| <i>SEC11A</i>   | 101         | 0         | 0.00%         | 196          | 0         | 0.00%         | 1.00 [0e+00-Inf]     | 1.000    | 1.000   |
| <i>SEC11C</i>   | 101         | 0         | 0.00%         | 196          | 0         | 0.00%         | 1.00 [0e+00-Inf]     | 1.000    | 1.000   |
| <i>SEC14L1</i>  | 101         | 0         | 0.00%         | 196          | 0         | 0.00%         | 1.00 [0e+00-Inf]     | 1.000    | 1.000   |
| <i>SEC14L5</i>  | 101         | 0         | 0.00%         | 196          | 0         | 0.00%         | 1.00 [0e+00-Inf]     | 1.000    | 1.000   |
| <i>SEC16B</i>   | 101         | 0         | 0.00%         | 196          | 0         | 0.00%         | 1.00 [0e+00-Inf]     | 1.000    | 1.000   |
| <i>SEC22B</i>   | 101         | 0         | 0.00%         | 196          | 0         | 0.00%         | 1.00 [0e+00-Inf]     | 1.000    | 1.000   |
| <i>SEC24C</i>   | 101         | 0         | 0.00%         | 196          | 0         | 0.00%         | 1.00 [0e+00-Inf]     | 1.000    | 1.000   |
| <i>SEC63</i>    | 101         | 0         | 0.00%         | 196          | 0         | 0.00%         | 1.00 [0e+00-Inf]     | 1.000    | 1.000   |
| <i>SECTM1</i>   | 101         | 0         | 0.00%         | 196          | 0         | 0.00%         | 1.00 [0e+00-Inf]     | 1.000    | 1.000   |
| <i>SELENBP1</i> | 101         | 0         | 0.00%         | 196          | 0         | 0.00%         | 1.00 [0e+00-Inf]     | 1.000    | 1.000   |
| <i>SELE</i>     | 101         | 0         | 0.00%         | 196          | 0         | 0.00%         | 1.00 [0e+00-Inf]     | 1.000    | 1.000   |
| <i>SELL</i>     | 101         | 0         | 0.00%         | 196          | 0         | 0.00%         | 1.00 [0e+00-Inf]     | 1.000    | 1.000   |
| <i>SELP</i>     | 101         | 0         | 0.00%         | 196          | 0         | 0.00%         | 1.00 [0e+00-Inf]     | 1.000    | 1.000   |
| <i>SEMA4A</i>   | 101         | 0         | 0.00%         | 196          | 0         | 0.00%         | 1.00 [0e+00-Inf]     | 1.000    | 1.000   |
| <i>SEMA4B</i>   | 101         | 0         | 0.00%         | 196          | 0         | 0.00%         | 1.00 [0e+00-Inf]     | 1.000    | 1.000   |
| <i>SEMA6C</i>   | 101         | 0         | 0.00%         | 196          | 0         | 0.00%         | 1.00 [0e+00-Inf]     | 1.000    | 1.000   |
| <i>SEMG1</i>    | 101         | 0         | 0.00%         | 196          | 0         | 0.00%         | 1.00 [0e+00-Inf]     | 1.000    | 1.000   |

| Symbol    | CINSARC Low |           |               | CINSARC High |           |               | CINSARC High vs. Low |          |         |
|-----------|-------------|-----------|---------------|--------------|-----------|---------------|----------------------|----------|---------|
|           | N tested    | N altered | Fq alteration | N tested     | N altered | Fq alteration | OR [95%CI]           | p-value* | q-value |
| SEMG2     | 101         | 0         | 0.00%         | 196          | 0         | 0.00%         | 1.00 [0e+00-Inf]     | 1.000    | 1.000   |
| SENP2     | 101         | 0         | 0.00%         | 196          | 0         | 0.00%         | 1.00 [0e+00-Inf]     | 1.000    | 1.000   |
| SENP5     | 101         | 0         | 0.00%         | 196          | 0         | 0.00%         | 1.00 [0e+00-Inf]     | 1.000    | 1.000   |
| SEPHS2    | 101         | 0         | 0.00%         | 196          | 0         | 0.00%         | 1.00 [0e+00-Inf]     | 1.000    | 1.000   |
| sept-12   | 101         | 0         | 0.00%         | 196          | 0         | 0.00%         | 1.00 [0e+00-Inf]     | 1.000    | 1.000   |
| sept-01   | 101         | 0         | 0.00%         | 196          | 0         | 0.00%         | 1.00 [0e+00-Inf]     | 1.000    | 1.000   |
| sept-09   | 101         | 0         | 0.00%         | 196          | 0         | 0.00%         | 1.00 [0e+00-Inf]     | 1.000    | 1.000   |
| MSRB1     | 101         | 0         | 0.00%         | 196          | 0         | 0.00%         | 1.00 [0e+00-Inf]     | 1.000    | 1.000   |
| SERINC3   | 101         | 0         | 0.00%         | 196          | 0         | 0.00%         | 1.00 [0e+00-Inf]     | 1.000    | 1.000   |
| SERPINB10 | 101         | 0         | 0.00%         | 196          | 0         | 0.00%         | 1.00 [0e+00-Inf]     | 1.000    | 1.000   |
| SERPINB11 | 101         | 0         | 0.00%         | 196          | 0         | 0.00%         | 1.00 [0e+00-Inf]     | 1.000    | 1.000   |
| SERPINB12 | 101         | 0         | 0.00%         | 196          | 0         | 0.00%         | 1.00 [0e+00-Inf]     | 1.000    | 1.000   |
| SERPINB13 | 101         | 0         | 0.00%         | 196          | 0         | 0.00%         | 1.00 [0e+00-Inf]     | 1.000    | 1.000   |
| SERPINB2  | 101         | 0         | 0.00%         | 196          | 0         | 0.00%         | 1.00 [0e+00-Inf]     | 1.000    | 1.000   |
| SERPINB3  | 101         | 0         | 0.00%         | 196          | 0         | 0.00%         | 1.00 [0e+00-Inf]     | 1.000    | 1.000   |
| SERPINB4  | 101         | 0         | 0.00%         | 196          | 0         | 0.00%         | 1.00 [0e+00-Inf]     | 1.000    | 1.000   |
| SERPINB5  | 101         | 0         | 0.00%         | 196          | 0         | 0.00%         | 1.00 [0e+00-Inf]     | 1.000    | 1.000   |
| SERPINB7  | 101         | 0         | 0.00%         | 196          | 0         | 0.00%         | 1.00 [0e+00-Inf]     | 1.000    | 1.000   |
| SERPINB8  | 101         | 0         | 0.00%         | 196          | 0         | 0.00%         | 1.00 [0e+00-Inf]     | 1.000    | 1.000   |
| SERPINC1  | 101         | 0         | 0.00%         | 196          | 0         | 0.00%         | 1.00 [0e+00-Inf]     | 1.000    | 1.000   |
| SERPINH1  | 101         | 0         | 0.00%         | 196          | 0         | 0.00%         | 1.00 [0e+00-Inf]     | 1.000    | 1.000   |
| SERTAD4   | 101         | 0         | 0.00%         | 196          | 0         | 0.00%         | 1.00 [0e+00-Inf]     | 1.000    | 1.000   |
| SESN1     | 101         | 0         | 0.00%         | 196          | 1         | 0.51%         | 3.2e+07 [0e+00-Inf]  | 0.997    | 1.000   |
| SETD1A    | 101         | 0         | 0.00%         | 196          | 0         | 0.00%         | 1.00 [0e+00-Inf]     | 1.000    | 1.000   |
| SETDB1    | 101         | 0         | 0.00%         | 196          | 0         | 0.00%         | 1.00 [0e+00-Inf]     | 1.000    | 1.000   |
| SEZ6L2    | 101         | 0         | 0.00%         | 196          | 0         | 0.00%         | 1.00 [0e+00-Inf]     | 1.000    | 1.000   |
| SEZ6      | 101         | 0         | 0.00%         | 196          | 0         | 0.00%         | 1.00 [0e+00-Inf]     | 1.000    | 1.000   |
| SF3B2     | 101         | 0         | 0.00%         | 196          | 0         | 0.00%         | 1.00 [0e+00-Inf]     | 1.000    | 1.000   |
| SF3B4     | 101         | 0         | 0.00%         | 196          | 0         | 0.00%         | 1.00 [0e+00-Inf]     | 1.000    | 1.000   |
| SFRP1     | 101         | 0         | 0.00%         | 196          | 0         | 0.00%         | 1.00 [0e+00-Inf]     | 1.000    | 1.000   |
| SRSF1     | 101         | 0         | 0.00%         | 196          | 0         | 0.00%         | 1.00 [0e+00-Inf]     | 1.000    | 1.000   |
| SRSF2     | 101         | 0         | 0.00%         | 196          | 0         | 0.00%         | 1.00 [0e+00-Inf]     | 1.000    | 1.000   |
| SRSF6     | 101         | 0         | 0.00%         | 196          | 0         | 0.00%         | 1.00 [0e+00-Inf]     | 1.000    | 1.000   |
| SFT2D2    | 101         | 0         | 0.00%         | 196          | 0         | 0.00%         | 1.00 [0e+00-Inf]     | 1.000    | 1.000   |
| SFTA3     | 101         | 0         | 0.00%         | 196          | 0         | 0.00%         | 1.00 [0e+00-Inf]     | 1.000    | 1.000   |
| SFTPA1    | 101         | 0         | 0.00%         | 196          | 0         | 0.00%         | 1.00 [0e+00-Inf]     | 1.000    | 1.000   |
| SGCA      | 101         | 0         | 0.00%         | 196          | 0         | 0.00%         | 1.00 [0e+00-Inf]     | 1.000    | 1.000   |
| POMK      | 101         | 0         | 0.00%         | 196          | 0         | 0.00%         | 1.00 [0e+00-Inf]     | 1.000    | 1.000   |
| SGK2      | 101         | 0         | 0.00%         | 196          | 0         | 0.00%         | 1.00 [0e+00-Inf]     | 1.000    | 1.000   |
| SGK3      | 101         | 0         | 0.00%         | 196          | 0         | 0.00%         | 1.00 [0e+00-Inf]     | 1.000    | 1.000   |
| SGSH      | 101         | 0         | 0.00%         | 196          | 0         | 0.00%         | 1.00 [0e+00-Inf]     | 1.000    | 1.000   |
| SH2B1     | 101         | 0         | 0.00%         | 196          | 0         | 0.00%         | 1.00 [0e+00-Inf]     | 1.000    | 1.000   |
| SH2D1B    | 101         | 0         | 0.00%         | 196          | 0         | 0.00%         | 1.00 [0e+00-Inf]     | 1.000    | 1.000   |
| SH2D2A    | 101         | 0         | 0.00%         | 196          | 0         | 0.00%         | 1.00 [0e+00-Inf]     | 1.000    | 1.000   |
| SH2D7     | 101         | 0         | 0.00%         | 196          | 0         | 0.00%         | 1.00 [0e+00-Inf]     | 1.000    | 1.000   |
| SH3BP5L   | 101         | 0         | 0.00%         | 196          | 0         | 0.00%         | 1.00 [0e+00-Inf]     | 1.000    | 1.000   |
| SHANK2    | 101         | 0         | 0.00%         | 196          | 0         | 0.00%         | 1.00 [0e+00-Inf]     | 1.000    | 1.000   |
| SHARPIN   | 101         | 0         | 0.00%         | 196          | 0         | 0.00%         | 1.00 [0e+00-Inf]     | 1.000    | 1.000   |
| SHC1      | 101         | 0         | 0.00%         | 196          | 0         | 0.00%         | 1.00 [0e+00-Inf]     | 1.000    | 1.000   |
| SHE       | 101         | 0         | 0.00%         | 196          | 0         | 0.00%         | 1.00 [0e+00-Inf]     | 1.000    | 1.000   |
| SHISA4    | 101         | 0         | 0.00%         | 196          | 0         | 0.00%         | 1.00 [0e+00-Inf]     | 1.000    | 1.000   |
| SHISA7    | 101         | 0         | 0.00%         | 196          | 0         | 0.00%         | 1.00 [0e+00-Inf]     | 1.000    | 1.000   |
| SHISA9    | 101         | 0         | 0.00%         | 196          | 0         | 0.00%         | 1.00 [0e+00-Inf]     | 1.000    | 1.000   |
| SIAH2     | 101         | 0         | 0.00%         | 196          | 0         | 0.00%         | 1.00 [0e+00-Inf]     | 1.000    | 1.000   |
| SIGLEC14  | 101         | 4         | 3.96%         | 196          | 8         | 4.08%         | 1.03 [0.37-2.88]     | 0.960    | 1.000   |
| SIGLEC9   | 101         | 0         | 0.00%         | 196          | 0         | 0.00%         | 1.00 [0e+00-Inf]     | 1.000    | 1.000   |
| SIGMAR1   | 101         | 0         | 0.00%         | 196          | 0         | 0.00%         | 1.00 [0e+00-Inf]     | 1.000    | 1.000   |
| SIPA1L2   | 101         | 0         | 0.00%         | 196          | 0         | 0.00%         | 1.00 [0e+00-Inf]     | 1.000    | 1.000   |
| SIRPB1    | 101         | 0         | 0.00%         | 196          | 0         | 0.00%         | 1.00 [0e+00-Inf]     | 1.000    | 1.000   |
| SIRT7     | 101         | 0         | 0.00%         | 196          | 0         | 0.00%         | 1.00 [0e+00-Inf]     | 1.000    | 1.000   |
| SKA2      | 101         | 0         | 0.00%         | 196          | 0         | 0.00%         | 1.00 [0e+00-Inf]     | 1.000    | 1.000   |
| SKAP1     | 101         | 0         | 0.00%         | 196          | 0         | 0.00%         | 1.00 [0e+00-Inf]     | 1.000    | 1.000   |
| SKAP2     | 101         | 0         | 0.00%         | 196          | 0         | 0.00%         | 1.00 [0e+00-Inf]     | 1.000    | 1.000   |
| SKIL      | 101         | 0         | 0.00%         | 196          | 0         | 0.00%         | 1.00 [0e+00-Inf]     | 1.000    | 1.000   |
| SLA2      | 101         | 0         | 0.00%         | 196          | 0         | 0.00%         | 1.00 [0e+00-Inf]     | 1.000    | 1.000   |
| SLAMF1    | 101         | 0         | 0.00%         | 196          | 0         | 0.00%         | 1.00 [0e+00-Inf]     | 1.000    | 1.000   |
| SLAMF6    | 101         | 0         | 0.00%         | 196          | 0         | 0.00%         | 1.00 [0e+00-Inf]     | 1.000    | 1.000   |
| SLAMF7    | 101         | 0         | 0.00%         | 196          | 0         | 0.00%         | 1.00 [0e+00-Inf]     | 1.000    | 1.000   |
| SLAMF8    | 101         | 0         | 0.00%         | 196          | 0         | 0.00%         | 1.00 [0e+00-Inf]     | 1.000    | 1.000   |
| SLAMF9    | 101         | 0         | 0.00%         | 196          | 0         | 0.00%         | 1.00 [0e+00-Inf]     | 1.000    | 1.000   |
| SLA       | 101         | 0         | 0.00%         | 196          | 0         | 0.00%         | 1.00 [0e+00-Inf]     | 1.000    | 1.000   |





| Symbol  | CINSARC Low |           |               | CINSARC High |           |               | CINSARC High vs. Low |          |         |
|---------|-------------|-----------|---------------|--------------|-----------|---------------|----------------------|----------|---------|
|         | N tested    | N altered | Fq alteration | N tested     | N altered | Fq alteration | OR [95%CI]           | p-value* | q-value |
| SOBP    | 101         | 0         | 0.00%         | 196          | 0         | 0.00%         | 1.00 [0e+00-Inf]     | 1.000    | 1.000   |
| SOCS1   | 101         | 0         | 0.00%         | 196          | 0         | 0.00%         | 1.00 [0e+00-Inf]     | 1.000    | 1.000   |
| SOCS3   | 101         | 0         | 0.00%         | 196          | 0         | 0.00%         | 1.00 [0e+00-Inf]     | 1.000    | 1.000   |
| SOCS7   | 101         | 0         | 0.00%         | 196          | 0         | 0.00%         | 1.00 [0e+00-Inf]     | 1.000    | 1.000   |
| CAPN15  | 101         | 0         | 0.00%         | 196          | 0         | 0.00%         | 1.00 [0e+00-Inf]     | 1.000    | 1.000   |
| SOX13   | 101         | 0         | 0.00%         | 196          | 0         | 0.00%         | 1.00 [0e+00-Inf]     | 1.000    | 1.000   |
| SOX17   | 101         | 0         | 0.00%         | 196          | 0         | 0.00%         | 1.00 [0e+00-Inf]     | 1.000    | 1.000   |
| SOX18   | 101         | 0         | 0.00%         | 196          | 0         | 0.00%         | 1.00 [0e+00-Inf]     | 1.000    | 1.000   |
| SOX2-OT | 101         | 0         | 0.00%         | 196          | 0         | 0.00%         | 1.00 [0e+00-Inf]     | 1.000    | 1.000   |
| SOX2    | 101         | 0         | 0.00%         | 196          | 0         | 0.00%         | 1.00 [0e+00-Inf]     | 1.000    | 1.000   |
| SOX6    | 101         | 0         | 0.00%         | 196          | 0         | 0.00%         | 1.00 [0e+00-Inf]     | 1.000    | 1.000   |
| SOX8    | 101         | 0         | 0.00%         | 196          | 0         | 0.00%         | 1.00 [0e+00-Inf]     | 1.000    | 1.000   |
| SOX9    | 101         | 0         | 0.00%         | 196          | 0         | 0.00%         | 1.00 [0e+00-Inf]     | 1.000    | 1.000   |
| SP2     | 101         | 0         | 0.00%         | 196          | 0         | 0.00%         | 1.00 [0e+00-Inf]     | 1.000    | 1.000   |
| SP4     | 101         | 0         | 0.00%         | 196          | 0         | 0.00%         | 1.00 [0e+00-Inf]     | 1.000    | 1.000   |
| SP6     | 101         | 0         | 0.00%         | 196          | 0         | 0.00%         | 1.00 [0e+00-Inf]     | 1.000    | 1.000   |
| SP8     | 101         | 0         | 0.00%         | 196          | 0         | 0.00%         | 1.00 [0e+00-Inf]     | 1.000    | 1.000   |
| SPACA3  | 101         | 0         | 0.00%         | 196          | 0         | 0.00%         | 1.00 [0e+00-Inf]     | 1.000    | 1.000   |
| SPAG1   | 101         | 0         | 0.00%         | 196          | 0         | 0.00%         | 1.00 [0e+00-Inf]     | 1.000    | 1.000   |
| SPAG4   | 101         | 0         | 0.00%         | 196          | 0         | 0.00%         | 1.00 [0e+00-Inf]     | 1.000    | 1.000   |
| SPAG5   | 101         | 0         | 0.00%         | 196          | 0         | 0.00%         | 1.00 [0e+00-Inf]     | 1.000    | 1.000   |
| SPAG9   | 101         | 0         | 0.00%         | 196          | 0         | 0.00%         | 1.00 [0e+00-Inf]     | 1.000    | 1.000   |
| SPATA17 | 101         | 0         | 0.00%         | 196          | 0         | 0.00%         | 1.00 [0e+00-Inf]     | 1.000    | 1.000   |
| SPATA20 | 101         | 0         | 0.00%         | 196          | 0         | 0.00%         | 1.00 [0e+00-Inf]     | 1.000    | 1.000   |
| SPATA2  | 101         | 0         | 0.00%         | 196          | 0         | 0.00%         | 1.00 [0e+00-Inf]     | 1.000    | 1.000   |
| SPATA8  | 101         | 0         | 0.00%         | 196          | 0         | 0.00%         | 1.00 [0e+00-Inf]     | 1.000    | 1.000   |
| SPATC1  | 101         | 0         | 0.00%         | 196          | 0         | 0.00%         | 1.00 [0e+00-Inf]     | 1.000    | 1.000   |
| SPCS2   | 101         | 0         | 0.00%         | 196          | 0         | 0.00%         | 1.00 [0e+00-Inf]     | 1.000    | 1.000   |
| SPHAR   | 101         | 0         | 0.00%         | 196          | 0         | 0.00%         | 1.00 [0e+00-Inf]     | 1.000    | 1.000   |
| SPHK1   | 101         | 0         | 0.00%         | 196          | 0         | 0.00%         | 1.00 [0e+00-Inf]     | 1.000    | 1.000   |
| EPPIN   | 101         | 0         | 0.00%         | 196          | 0         | 0.00%         | 1.00 [0e+00-Inf]     | 1.000    | 1.000   |
| SPINT3  | 101         | 0         | 0.00%         | 196          | 0         | 0.00%         | 1.00 [0e+00-Inf]     | 1.000    | 1.000   |
| SPINT4  | 101         | 0         | 0.00%         | 196          | 0         | 0.00%         | 1.00 [0e+00-Inf]     | 1.000    | 1.000   |
| SPNS1   | 101         | 0         | 0.00%         | 196          | 0         | 0.00%         | 1.00 [0e+00-Inf]     | 1.000    | 1.000   |
| SPN     | 101         | 0         | 0.00%         | 196          | 0         | 0.00%         | 1.00 [0e+00-Inf]     | 1.000    | 1.000   |
| SPO11   | 101         | 0         | 0.00%         | 196          | 0         | 0.00%         | 1.00 [0e+00-Inf]     | 1.000    | 1.000   |
| SPOP    | 101         | 0         | 0.00%         | 196          | 0         | 0.00%         | 1.00 [0e+00-Inf]     | 1.000    | 1.000   |
| SPRR1A  | 101         | 0         | 0.00%         | 196          | 0         | 0.00%         | 1.00 [0e+00-Inf]     | 1.000    | 1.000   |
| SPRR1B  | 101         | 0         | 0.00%         | 196          | 0         | 0.00%         | 1.00 [0e+00-Inf]     | 1.000    | 1.000   |
| SPRR2A  | 101         | 0         | 0.00%         | 196          | 0         | 0.00%         | 1.00 [0e+00-Inf]     | 1.000    | 1.000   |
| SPRR2B  | 101         | 0         | 0.00%         | 196          | 0         | 0.00%         | 1.00 [0e+00-Inf]     | 1.000    | 1.000   |
| SPRR2C  | 101         | 0         | 0.00%         | 196          | 0         | 0.00%         | 1.00 [0e+00-Inf]     | 1.000    | 1.000   |
| SPRR2D  | 101         | 0         | 0.00%         | 196          | 0         | 0.00%         | 1.00 [0e+00-Inf]     | 1.000    | 1.000   |
| SPRR2E  | 101         | 0         | 0.00%         | 196          | 0         | 0.00%         | 1.00 [0e+00-Inf]     | 1.000    | 1.000   |
| SPRR2F  | 101         | 0         | 0.00%         | 196          | 0         | 0.00%         | 1.00 [0e+00-Inf]     | 1.000    | 1.000   |
| SPRR2G  | 101         | 0         | 0.00%         | 196          | 0         | 0.00%         | 1.00 [0e+00-Inf]     | 1.000    | 1.000   |
| SPRR3   | 101         | 0         | 0.00%         | 196          | 0         | 0.00%         | 1.00 [0e+00-Inf]     | 1.000    | 1.000   |
| SPRR4   | 101         | 0         | 0.00%         | 196          | 0         | 0.00%         | 1.00 [0e+00-Inf]     | 1.000    | 1.000   |
| SPSB3   | 101         | 0         | 0.00%         | 196          | 0         | 0.00%         | 1.00 [0e+00-Inf]     | 1.000    | 1.000   |
| SPTA1   | 101         | 0         | 0.00%         | 196          | 0         | 0.00%         | 1.00 [0e+00-Inf]     | 1.000    | 1.000   |
| SPTBN2  | 101         | 0         | 0.00%         | 196          | 0         | 0.00%         | 1.00 [0e+00-Inf]     | 1.000    | 1.000   |
| SQLE    | 101         | 0         | 0.00%         | 196          | 0         | 0.00%         | 1.00 [0e+00-Inf]     | 1.000    | 1.000   |
| SRCAP   | 101         | 0         | 0.00%         | 196          | 0         | 0.00%         | 1.00 [0e+00-Inf]     | 1.000    | 1.000   |
| SRCIN1  | 101         | 0         | 0.00%         | 196          | 0         | 0.00%         | 1.00 [0e+00-Inf]     | 1.000    | 1.000   |
| SRC     | 101         | 0         | 0.00%         | 196          | 0         | 0.00%         | 1.00 [0e+00-Inf]     | 1.000    | 1.000   |
| SRGAP1  | 101         | 0         | 0.00%         | 196          | 0         | 0.00%         | 1.00 [0e+00-Inf]     | 1.000    | 1.000   |
| SRGAP2  | 101         | 0         | 0.00%         | 196          | 0         | 0.00%         | 1.00 [0e+00-Inf]     | 1.000    | 1.000   |
| SRL     | 101         | 0         | 0.00%         | 196          | 0         | 0.00%         | 1.00 [0e+00-Inf]     | 1.000    | 1.000   |
| SRMS    | 101         | 0         | 0.00%         | 196          | 0         | 0.00%         | 1.00 [0e+00-Inf]     | 1.000    | 1.000   |
| SRP54   | 101         | 0         | 0.00%         | 196          | 0         | 0.00%         | 1.00 [0e+00-Inf]     | 1.000    | 1.000   |
| SRP68   | 101         | 0         | 0.00%         | 196          | 0         | 0.00%         | 1.00 [0e+00-Inf]     | 1.000    | 1.000   |
| SRP9    | 101         | 0         | 0.00%         | 196          | 0         | 0.00%         | 1.00 [0e+00-Inf]     | 1.000    | 1.000   |
| SRRM2   | 101         | 0         | 0.00%         | 196          | 0         | 0.00%         | 1.00 [0e+00-Inf]     | 1.000    | 1.000   |
| SRY     | 101         | 62        | 61.39%        | 196          | 108       | 55.10%        | 0.77 [0.51-1.16]     | 0.300    | 1.000   |
| SS18L1  | 101         | 0         | 0.00%         | 196          | 0         | 0.00%         | 1.00 [0e+00-Inf]     | 1.000    | 1.000   |
| SSC5D   | 101         | 0         | 0.00%         | 196          | 0         | 0.00%         | 1.00 [0e+00-Inf]     | 1.000    | 1.000   |
| SSH2    | 101         | 0         | 0.00%         | 196          | 0         | 0.00%         | 1.00 [0e+00-Inf]     | 1.000    | 1.000   |
| SSH3    | 101         | 0         | 0.00%         | 196          | 0         | 0.00%         | 1.00 [0e+00-Inf]     | 1.000    | 1.000   |
| SSR2    | 101         | 0         | 0.00%         | 196          | 0         | 0.00%         | 1.00 [0e+00-Inf]     | 1.000    | 1.000   |
| SSTR1   | 101         | 0         | 0.00%         | 196          | 0         | 0.00%         | 1.00 [0e+00-Inf]     | 1.000    | 1.000   |
| SSTR2   | 101         | 0         | 0.00%         | 196          | 0         | 0.00%         | 1.00 [0e+00-Inf]     | 1.000    | 1.000   |



| Symbol   | CINSARC Low |           |               | CINSARC High |           |               | CINSARC High vs. Low |          |         |
|----------|-------------|-----------|---------------|--------------|-----------|---------------|----------------------|----------|---------|
|          | N tested    | N altered | Fq alteration | N tested     | N altered | Fq alteration | OR [95%CI]           | p-value* | q-value |
| TAKO2    | 101         | 0         | 0.00%         | 196          | 0         | 0.00%         | 1.00 [0e+00-Inf]     | 1.000    | 1.000   |
| TARBP1   | 101         | 0         | 0.00%         | 196          | 0         | 0.00%         | 1.00 [0e+00-Inf]     | 1.000    | 1.000   |
| TARP     | 101         | 0         | 0.00%         | 196          | 0         | 0.00%         | 1.00 [0e+00-Inf]     | 1.000    | 1.000   |
| TARS2    | 101         | 0         | 0.00%         | 196          | 0         | 0.00%         | 1.00 [0e+00-Inf]     | 1.000    | 1.000   |
| TAS2R39  | 101         | 0         | 0.00%         | 196          | 0         | 0.00%         | 1.00 [0e+00-Inf]     | 1.000    | 1.000   |
| TAS2R40  | 101         | 0         | 0.00%         | 196          | 0         | 0.00%         | 1.00 [0e+00-Inf]     | 1.000    | 1.000   |
| TAS2R43  | 101         | 0         | 0.00%         | 196          | 0         | 0.00%         | 1.00 [0e+00-Inf]     | 1.000    | 1.000   |
| TATDN1   | 101         | 0         | 0.00%         | 196          | 0         | 0.00%         | 1.00 [0e+00-Inf]     | 1.000    | 1.000   |
| TATDN3   | 101         | 0         | 0.00%         | 196          | 0         | 0.00%         | 1.00 [0e+00-Inf]     | 1.000    | 1.000   |
| TAX1BP1  | 101         | 0         | 0.00%         | 196          | 0         | 0.00%         | 1.00 [0e+00-Inf]     | 1.000    | 1.000   |
| TBC1D10B | 101         | 0         | 0.00%         | 196          | 0         | 0.00%         | 1.00 [0e+00-Inf]     | 1.000    | 1.000   |
| TBC1D10C | 101         | 0         | 0.00%         | 196          | 0         | 0.00%         | 1.00 [0e+00-Inf]     | 1.000    | 1.000   |
| TBC1D15  | 101         | 0         | 0.00%         | 196          | 0         | 0.00%         | 1.00 [0e+00-Inf]     | 1.000    | 1.000   |
| TBC1D16  | 101         | 0         | 0.00%         | 196          | 0         | 0.00%         | 1.00 [0e+00-Inf]     | 1.000    | 1.000   |
| TBC1D24  | 101         | 0         | 0.00%         | 196          | 0         | 0.00%         | 1.00 [0e+00-Inf]     | 1.000    | 1.000   |
| TBC1D3B  | 101         | 0         | 0.00%         | 196          | 0         | 0.00%         | 1.00 [0e+00-Inf]     | 1.000    | 1.000   |
| TBC1D3C  | 101         | 0         | 0.00%         | 196          | 0         | 0.00%         | 1.00 [0e+00-Inf]     | 1.000    | 1.000   |
| TBC1D3G  | 101         | 0         | 0.00%         | 196          | 0         | 0.00%         | 1.00 [0e+00-Inf]     | 1.000    | 1.000   |
| TBC1D3H  | 101         | 0         | 0.00%         | 196          | 0         | 0.00%         | 1.00 [0e+00-Inf]     | 1.000    | 1.000   |
| TBC1D3P2 | 101         | 0         | 0.00%         | 196          | 0         | 0.00%         | 1.00 [0e+00-Inf]     | 1.000    | 1.000   |
| TBC1D3   | 101         | 0         | 0.00%         | 196          | 0         | 0.00%         | 1.00 [0e+00-Inf]     | 1.000    | 1.000   |
| TBC1D7   | 101         | 0         | 0.00%         | 196          | 0         | 0.00%         | 1.00 [0e+00-Inf]     | 1.000    | 1.000   |
| TBCD     | 101         | 0         | 0.00%         | 196          | 0         | 0.00%         | 1.00 [0e+00-Inf]     | 1.000    | 1.000   |
| TBCE     | 101         | 0         | 0.00%         | 196          | 0         | 0.00%         | 1.00 [0e+00-Inf]     | 1.000    | 1.000   |
| TBK1     | 101         | 0         | 0.00%         | 196          | 0         | 0.00%         | 1.00 [0e+00-Inf]     | 1.000    | 1.000   |
| TBKBP1   | 101         | 0         | 0.00%         | 196          | 0         | 0.00%         | 1.00 [0e+00-Inf]     | 1.000    | 1.000   |
| TBL1XR1  | 101         | 0         | 0.00%         | 196          | 0         | 0.00%         | 1.00 [0e+00-Inf]     | 1.000    | 1.000   |
| TBL1Y    | 101         | 64        | 63.37%        | 196          | 115       | 58.67%        | 0.82 [0.54-1.24]     | 0.434    | 1.000   |
| TBL3     | 101         | 0         | 0.00%         | 196          | 0         | 0.00%         | 1.00 [0e+00-Inf]     | 1.000    | 1.000   |
| TBX10    | 101         | 0         | 0.00%         | 196          | 0         | 0.00%         | 1.00 [0e+00-Inf]     | 1.000    | 1.000   |
| TBX19    | 101         | 0         | 0.00%         | 196          | 0         | 0.00%         | 1.00 [0e+00-Inf]     | 1.000    | 1.000   |
| TBX21    | 101         | 0         | 0.00%         | 196          | 0         | 0.00%         | 1.00 [0e+00-Inf]     | 1.000    | 1.000   |
| TBX2     | 101         | 0         | 0.00%         | 196          | 0         | 0.00%         | 1.00 [0e+00-Inf]     | 1.000    | 1.000   |
| TBX4     | 101         | 0         | 0.00%         | 196          | 0         | 0.00%         | 1.00 [0e+00-Inf]     | 1.000    | 1.000   |
| TBX6     | 101         | 0         | 0.00%         | 196          | 0         | 0.00%         | 1.00 [0e+00-Inf]     | 1.000    | 1.000   |
| TCAM1P   | 101         | 0         | 0.00%         | 196          | 0         | 0.00%         | 1.00 [0e+00-Inf]     | 1.000    | 1.000   |
| TCAP     | 101         | 0         | 0.00%         | 196          | 0         | 0.00%         | 1.00 [0e+00-Inf]     | 1.000    | 1.000   |
| TCEA1    | 101         | 0         | 0.00%         | 196          | 0         | 0.00%         | 1.00 [0e+00-Inf]     | 1.000    | 1.000   |
| TCEA2    | 101         | 0         | 0.00%         | 196          | 0         | 0.00%         | 1.00 [0e+00-Inf]     | 1.000    | 1.000   |
| TCFL5    | 101         | 0         | 0.00%         | 196          | 0         | 0.00%         | 1.00 [0e+00-Inf]     | 1.000    | 1.000   |
| TCHHL1   | 101         | 0         | 0.00%         | 196          | 0         | 0.00%         | 1.00 [0e+00-Inf]     | 1.000    | 1.000   |
| TCHH     | 101         | 0         | 0.00%         | 196          | 0         | 0.00%         | 1.00 [0e+00-Inf]     | 1.000    | 1.000   |
| TCIRG1   | 101         | 0         | 0.00%         | 196          | 0         | 0.00%         | 1.00 [0e+00-Inf]     | 1.000    | 1.000   |
| TCTEX1D2 | 101         | 0         | 0.00%         | 196          | 0         | 0.00%         | 1.00 [0e+00-Inf]     | 1.000    | 1.000   |
| TDRD10   | 101         | 0         | 0.00%         | 196          | 0         | 0.00%         | 1.00 [0e+00-Inf]     | 1.000    | 1.000   |
| TDRD5    | 101         | 0         | 0.00%         | 196          | 0         | 0.00%         | 1.00 [0e+00-Inf]     | 1.000    | 1.000   |
| TDRKH    | 101         | 0         | 0.00%         | 196          | 0         | 0.00%         | 1.00 [0e+00-Inf]     | 1.000    | 1.000   |
| TEDDM1   | 101         | 0         | 0.00%         | 196          | 0         | 0.00%         | 1.00 [0e+00-Inf]     | 1.000    | 1.000   |
| TEKT5    | 101         | 0         | 0.00%         | 196          | 0         | 0.00%         | 1.00 [0e+00-Inf]     | 1.000    | 1.000   |
| TELO2    | 101         | 0         | 0.00%         | 196          | 0         | 0.00%         | 1.00 [0e+00-Inf]     | 1.000    | 1.000   |
| TERF1    | 101         | 0         | 0.00%         | 196          | 0         | 0.00%         | 1.00 [0e+00-Inf]     | 1.000    | 1.000   |
| TEX14    | 101         | 0         | 0.00%         | 196          | 0         | 0.00%         | 1.00 [0e+00-Inf]     | 1.000    | 1.000   |
| TEX15    | 101         | 0         | 0.00%         | 196          | 0         | 0.00%         | 1.00 [0e+00-Inf]     | 1.000    | 1.000   |
| TEX19    | 101         | 0         | 0.00%         | 196          | 0         | 0.00%         | 1.00 [0e+00-Inf]     | 1.000    | 1.000   |
| TEX2     | 101         | 0         | 0.00%         | 196          | 0         | 0.00%         | 1.00 [0e+00-Inf]     | 1.000    | 1.000   |
| TFAP2C   | 101         | 0         | 0.00%         | 196          | 0         | 0.00%         | 1.00 [0e+00-Inf]     | 1.000    | 1.000   |
| TFAP4    | 101         | 0         | 0.00%         | 196          | 0         | 0.00%         | 1.00 [0e+00-Inf]     | 1.000    | 1.000   |
| TFB2M    | 101         | 0         | 0.00%         | 196          | 0         | 0.00%         | 1.00 [0e+00-Inf]     | 1.000    | 1.000   |
| TFRC     | 101         | 0         | 0.00%         | 196          | 0         | 0.00%         | 1.00 [0e+00-Inf]     | 1.000    | 1.000   |
| TGFB111  | 101         | 0         | 0.00%         | 196          | 0         | 0.00%         | 1.00 [0e+00-Inf]     | 1.000    | 1.000   |
| TGFB2    | 101         | 0         | 0.00%         | 196          | 0         | 0.00%         | 1.00 [0e+00-Inf]     | 1.000    | 1.000   |
| TGIF2LY  | 101         | 58        | 57.43%        | 196          | 102       | 52.04%        | 0.80 [0.54-1.21]     | 0.378    | 1.000   |
| TGIF2    | 101         | 0         | 0.00%         | 196          | 0         | 0.00%         | 1.00 [0e+00-Inf]     | 1.000    | 1.000   |
| TGM2     | 101         | 0         | 0.00%         | 196          | 0         | 0.00%         | 1.00 [0e+00-Inf]     | 1.000    | 1.000   |
| TGS1     | 101         | 0         | 0.00%         | 196          | 0         | 0.00%         | 1.00 [0e+00-Inf]     | 1.000    | 1.000   |
| TG       | 101         | 0         | 0.00%         | 196          | 0         | 0.00%         | 1.00 [0e+00-Inf]     | 1.000    | 1.000   |
| NELFCD   | 101         | 0         | 0.00%         | 196          | 0         | 0.00%         | 1.00 [0e+00-Inf]     | 1.000    | 1.000   |
| THAP1    | 101         | 0         | 0.00%         | 196          | 0         | 0.00%         | 1.00 [0e+00-Inf]     | 1.000    | 1.000   |
| THAP2    | 101         | 0         | 0.00%         | 196          | 0         | 0.00%         | 1.00 [0e+00-Inf]     | 1.000    | 1.000   |
| THAP6    | 101         | 0         | 0.00%         | 196          | 0         | 0.00%         | 1.00 [0e+00-Inf]     | 1.000    | 1.000   |
| THBS3    | 101         | 0         | 0.00%         | 196          | 0         | 0.00%         | 1.00 [0e+00-Inf]     | 1.000    | 1.000   |





| Symbol    | CINSARC Low |           |               | CINSARC High |           |               | CINSARC High vs. Low |          |         |
|-----------|-------------|-----------|---------------|--------------|-----------|---------------|----------------------|----------|---------|
|           | N tested    | N altered | Fq alteration | N tested     | N altered | Fq alteration | OR [95%CI]           | p-value* | q-value |
| TMEM8A    | 101         | 0         | 0.00%         | 196          | 0         | 0.00%         | 1.00 [0e+00-Inf]     | 1.000    | 1.000   |
| TMEM92    | 101         | 0         | 0.00%         | 196          | 0         | 0.00%         | 1.00 [0e+00-Inf]     | 1.000    | 1.000   |
| TMEM97    | 101         | 0         | 0.00%         | 196          | 0         | 0.00%         | 1.00 [0e+00-Inf]     | 1.000    | 1.000   |
| TMEM98    | 101         | 0         | 0.00%         | 196          | 0         | 0.00%         | 1.00 [0e+00-Inf]     | 1.000    | 1.000   |
| TMEM99    | 101         | 0         | 0.00%         | 196          | 0         | 0.00%         | 1.00 [0e+00-Inf]     | 1.000    | 1.000   |
| TMEM9     | 101         | 0         | 0.00%         | 196          | 0         | 0.00%         | 1.00 [0e+00-Inf]     | 1.000    | 1.000   |
| TMIGD1    | 101         | 0         | 0.00%         | 196          | 0         | 0.00%         | 1.00 [0e+00-Inf]     | 1.000    | 1.000   |
| TMOD4     | 101         | 0         | 0.00%         | 196          | 0         | 0.00%         | 1.00 [0e+00-Inf]     | 1.000    | 1.000   |
| TMSB4Y    | 101         | 64        | 63.37%        | 196          | 116       | 59.18%        | 0.84 [0.55-1.27]     | 0.485    | 1.000   |
| TMTC3     | 101         | 0         | 0.00%         | 196          | 0         | 0.00%         | 1.00 [0e+00-Inf]     | 1.000    | 1.000   |
| TNFAIP1   | 101         | 0         | 0.00%         | 196          | 0         | 0.00%         | 1.00 [0e+00-Inf]     | 1.000    | 1.000   |
| TNFAIP8L2 | 101         | 0         | 0.00%         | 196          | 0         | 0.00%         | 1.00 [0e+00-Inf]     | 1.000    | 1.000   |
| TNFRSF11A | 101         | 0         | 0.00%         | 196          | 0         | 0.00%         | 1.00 [0e+00-Inf]     | 1.000    | 1.000   |
| TNFRSF11B | 101         | 0         | 0.00%         | 196          | 0         | 0.00%         | 1.00 [0e+00-Inf]     | 1.000    | 1.000   |
| TNFRSF12A | 101         | 0         | 0.00%         | 196          | 0         | 0.00%         | 1.00 [0e+00-Inf]     | 1.000    | 1.000   |
| TNFRSF17  | 101         | 0         | 0.00%         | 196          | 0         | 0.00%         | 1.00 [0e+00-Inf]     | 1.000    | 1.000   |
| TNFRSF6B  | 101         | 0         | 0.00%         | 196          | 0         | 0.00%         | 1.00 [0e+00-Inf]     | 1.000    | 1.000   |
| TNFSF18   | 101         | 0         | 0.00%         | 196          | 0         | 0.00%         | 1.00 [0e+00-Inf]     | 1.000    | 1.000   |
| TNFSF4    | 101         | 0         | 0.00%         | 196          | 0         | 0.00%         | 1.00 [0e+00-Inf]     | 1.000    | 1.000   |
| TNK2      | 101         | 0         | 0.00%         | 196          | 0         | 0.00%         | 1.00 [0e+00-Inf]     | 1.000    | 1.000   |
| TNNC2     | 101         | 0         | 0.00%         | 196          | 0         | 0.00%         | 1.00 [0e+00-Inf]     | 1.000    | 1.000   |
| TNNI1     | 101         | 0         | 0.00%         | 196          | 0         | 0.00%         | 1.00 [0e+00-Inf]     | 1.000    | 1.000   |
| TNNT2     | 101         | 0         | 0.00%         | 196          | 0         | 0.00%         | 1.00 [0e+00-Inf]     | 1.000    | 1.000   |
| TNN       | 101         | 0         | 0.00%         | 196          | 0         | 0.00%         | 1.00 [0e+00-Inf]     | 1.000    | 1.000   |
| TNP2      | 101         | 0         | 0.00%         | 196          | 0         | 0.00%         | 1.00 [0e+00-Inf]     | 1.000    | 1.000   |
| TNRC6A    | 101         | 0         | 0.00%         | 196          | 0         | 0.00%         | 1.00 [0e+00-Inf]     | 1.000    | 1.000   |
| TNRC6C    | 101         | 0         | 0.00%         | 196          | 0         | 0.00%         | 1.00 [0e+00-Inf]     | 1.000    | 1.000   |
| TNR       | 101         | 0         | 0.00%         | 196          | 0         | 0.00%         | 1.00 [0e+00-Inf]     | 1.000    | 1.000   |
| TNS4      | 101         | 0         | 0.00%         | 196          | 0         | 0.00%         | 1.00 [0e+00-Inf]     | 1.000    | 1.000   |
| TOB1      | 101         | 0         | 0.00%         | 196          | 0         | 0.00%         | 1.00 [0e+00-Inf]     | 1.000    | 1.000   |
| TOM1L1    | 101         | 0         | 0.00%         | 196          | 0         | 0.00%         | 1.00 [0e+00-Inf]     | 1.000    | 1.000   |
| TOMM20    | 101         | 0         | 0.00%         | 196          | 0         | 0.00%         | 1.00 [0e+00-Inf]     | 1.000    | 1.000   |
| TOMM34    | 101         | 0         | 0.00%         | 196          | 0         | 0.00%         | 1.00 [0e+00-Inf]     | 1.000    | 1.000   |
| TOMM40L   | 101         | 0         | 0.00%         | 196          | 0         | 0.00%         | 1.00 [0e+00-Inf]     | 1.000    | 1.000   |
| TOMM7     | 101         | 0         | 0.00%         | 196          | 0         | 0.00%         | 1.00 [0e+00-Inf]     | 1.000    | 1.000   |
| TOP1MT    | 101         | 0         | 0.00%         | 196          | 0         | 0.00%         | 1.00 [0e+00-Inf]     | 1.000    | 1.000   |
| TOP1P1    | 101         | 0         | 0.00%         | 196          | 0         | 0.00%         | 1.00 [0e+00-Inf]     | 1.000    | 1.000   |
| TOP1      | 101         | 0         | 0.00%         | 196          | 0         | 0.00%         | 1.00 [0e+00-Inf]     | 1.000    | 1.000   |
| TOP2A     | 101         | 0         | 0.00%         | 196          | 0         | 0.00%         | 1.00 [0e+00-Inf]     | 1.000    | 1.000   |
| TOR1AIP1  | 101         | 0         | 0.00%         | 196          | 0         | 0.00%         | 1.00 [0e+00-Inf]     | 1.000    | 1.000   |
| TOR1AIP2  | 101         | 0         | 0.00%         | 196          | 0         | 0.00%         | 1.00 [0e+00-Inf]     | 1.000    | 1.000   |
| TOR3A     | 101         | 0         | 0.00%         | 196          | 0         | 0.00%         | 1.00 [0e+00-Inf]     | 1.000    | 1.000   |
| TOX2      | 101         | 0         | 0.00%         | 196          | 0         | 0.00%         | 1.00 [0e+00-Inf]     | 1.000    | 1.000   |
| TOX       | 101         | 0         | 0.00%         | 196          | 0         | 0.00%         | 1.00 [0e+00-Inf]     | 1.000    | 1.000   |
| TP53BP2   | 101         | 0         | 0.00%         | 196          | 0         | 0.00%         | 1.00 [0e+00-Inf]     | 1.000    | 1.000   |
| TP53I13   | 101         | 0         | 0.00%         | 196          | 0         | 0.00%         | 1.00 [0e+00-Inf]     | 1.000    | 1.000   |
| TP53INP1  | 101         | 0         | 0.00%         | 196          | 0         | 0.00%         | 1.00 [0e+00-Inf]     | 1.000    | 1.000   |
| TP53INP2  | 101         | 0         | 0.00%         | 196          | 0         | 0.00%         | 1.00 [0e+00-Inf]     | 1.000    | 1.000   |
| TP53RK    | 101         | 0         | 0.00%         | 196          | 0         | 0.00%         | 1.00 [0e+00-Inf]     | 1.000    | 1.000   |
| TP53TG3B  | 101         | 0         | 0.00%         | 196          | 0         | 0.00%         | 1.00 [0e+00-Inf]     | 1.000    | 1.000   |
| TP53TG5   | 101         | 0         | 0.00%         | 196          | 0         | 0.00%         | 1.00 [0e+00-Inf]     | 1.000    | 1.000   |
| TP63      | 101         | 0         | 0.00%         | 196          | 0         | 0.00%         | 1.00 [0e+00-Inf]     | 1.000    | 1.000   |
| TPCN2     | 101         | 0         | 0.00%         | 196          | 0         | 0.00%         | 1.00 [0e+00-Inf]     | 1.000    | 1.000   |
| TPD52L2   | 101         | 0         | 0.00%         | 196          | 0         | 0.00%         | 1.00 [0e+00-Inf]     | 1.000    | 1.000   |
| TPD52     | 101         | 0         | 0.00%         | 196          | 0         | 0.00%         | 1.00 [0e+00-Inf]     | 1.000    | 1.000   |
| TPH1      | 101         | 0         | 0.00%         | 196          | 0         | 0.00%         | 1.00 [0e+00-Inf]     | 1.000    | 1.000   |
| TPH2      | 101         | 0         | 0.00%         | 196          | 0         | 0.00%         | 1.00 [0e+00-Inf]     | 1.000    | 1.000   |
| TPM3      | 101         | 0         | 0.00%         | 196          | 0         | 0.00%         | 1.00 [0e+00-Inf]     | 1.000    | 1.000   |
| TPRG1     | 101         | 0         | 0.00%         | 196          | 0         | 0.00%         | 1.00 [0e+00-Inf]     | 1.000    | 1.000   |
| TPR       | 101         | 0         | 0.00%         | 196          | 0         | 0.00%         | 1.00 [0e+00-Inf]     | 1.000    | 1.000   |
| TPSAB1    | 101         | 0         | 0.00%         | 196          | 0         | 0.00%         | 1.00 [0e+00-Inf]     | 1.000    | 1.000   |
| TPSB2     | 101         | 0         | 0.00%         | 196          | 0         | 0.00%         | 1.00 [0e+00-Inf]     | 1.000    | 1.000   |
| TPSD1     | 101         | 0         | 0.00%         | 196          | 0         | 0.00%         | 1.00 [0e+00-Inf]     | 1.000    | 1.000   |
| TPSG1     | 101         | 0         | 0.00%         | 196          | 0         | 0.00%         | 1.00 [0e+00-Inf]     | 1.000    | 1.000   |
| TRA2A     | 101         | 0         | 0.00%         | 196          | 0         | 0.00%         | 1.00 [0e+00-Inf]     | 1.000    | 1.000   |
| TRAF3IP3  | 101         | 0         | 0.00%         | 196          | 0         | 0.00%         | 1.00 [0e+00-Inf]     | 1.000    | 1.000   |
| TRAF4     | 101         | 0         | 0.00%         | 196          | 0         | 0.00%         | 1.00 [0e+00-Inf]     | 1.000    | 1.000   |
| TRAF5     | 101         | 0         | 0.00%         | 196          | 0         | 0.00%         | 1.00 [0e+00-Inf]     | 1.000    | 1.000   |
| TRAF7     | 101         | 0         | 0.00%         | 196          | 0         | 0.00%         | 1.00 [0e+00-Inf]     | 1.000    | 1.000   |
| TRAM1     | 101         | 0         | 0.00%         | 196          | 0         | 0.00%         | 1.00 [0e+00-Inf]     | 1.000    | 1.000   |
| TRAP1     | 101         | 0         | 0.00%         | 196          | 0         | 0.00%         | 1.00 [0e+00-Inf]     | 1.000    | 1.000   |

| Symbol      | CINSARC Low |           |               | CINSARC High |           |               | CINSARC High vs. Low |          |         |
|-------------|-------------|-----------|---------------|--------------|-----------|---------------|----------------------|----------|---------|
|             | N tested    | N altered | Fq alteration | N tested     | N altered | Fq alteration | OR [95%CI]           | p-value* | q-value |
| TRAPPC9     | 101         | 0         | 0.00%         | 196          | 0         | 0.00%         | 1.00 [0e+00-Inf]     | 1.000    | 1.000   |
| TRHDE       | 101         | 0         | 0.00%         | 196          | 0         | 0.00%         | 1.00 [0e+00-Inf]     | 1.000    | 1.000   |
| TRHR        | 101         | 0         | 0.00%         | 196          | 0         | 0.00%         | 1.00 [0e+00-Inf]     | 1.000    | 1.000   |
| TRIB1       | 101         | 0         | 0.00%         | 196          | 0         | 0.00%         | 1.00 [0e+00-Inf]     | 1.000    | 1.000   |
| TRIL        | 101         | 0         | 0.00%         | 196          | 0         | 0.00%         | 1.00 [0e+00-Inf]     | 1.000    | 1.000   |
| TRIM11      | 101         | 0         | 0.00%         | 196          | 0         | 0.00%         | 1.00 [0e+00-Inf]     | 1.000    | 1.000   |
| TRIM17      | 101         | 0         | 0.00%         | 196          | 0         | 0.00%         | 1.00 [0e+00-Inf]     | 1.000    | 1.000   |
| TRIM25      | 101         | 0         | 0.00%         | 196          | 0         | 0.00%         | 1.00 [0e+00-Inf]     | 1.000    | 1.000   |
| TRIM37      | 101         | 0         | 0.00%         | 196          | 0         | 0.00%         | 1.00 [0e+00-Inf]     | 1.000    | 1.000   |
| TRIM46      | 101         | 0         | 0.00%         | 196          | 0         | 0.00%         | 1.00 [0e+00-Inf]     | 1.000    | 1.000   |
| TRIM47      | 101         | 0         | 0.00%         | 196          | 0         | 0.00%         | 1.00 [0e+00-Inf]     | 1.000    | 1.000   |
| TRIM55      | 101         | 0         | 0.00%         | 196          | 0         | 0.00%         | 1.00 [0e+00-Inf]     | 1.000    | 1.000   |
| TRIM58      | 101         | 0         | 0.00%         | 196          | 0         | 0.00%         | 1.00 [0e+00-Inf]     | 1.000    | 1.000   |
| TRIM65      | 101         | 0         | 0.00%         | 196          | 0         | 0.00%         | 1.00 [0e+00-Inf]     | 1.000    | 1.000   |
| TRIM67      | 101         | 0         | 0.00%         | 196          | 0         | 0.00%         | 1.00 [0e+00-Inf]     | 1.000    | 1.000   |
| TRIM72      | 101         | 0         | 0.00%         | 196          | 0         | 0.00%         | 1.00 [0e+00-Inf]     | 1.000    | 1.000   |
| TRMT12      | 101         | 0         | 0.00%         | 196          | 0         | 0.00%         | 1.00 [0e+00-Inf]     | 1.000    | 1.000   |
| TRPA1       | 101         | 0         | 0.00%         | 196          | 0         | 0.00%         | 1.00 [0e+00-Inf]     | 1.000    | 1.000   |
| TRPC4AP     | 101         | 0         | 0.00%         | 196          | 0         | 0.00%         | 1.00 [0e+00-Inf]     | 1.000    | 1.000   |
| TRPS1       | 101         | 0         | 0.00%         | 196          | 0         | 0.00%         | 1.00 [0e+00-Inf]     | 1.000    | 1.000   |
| TRPV5       | 101         | 0         | 0.00%         | 196          | 0         | 0.00%         | 1.00 [0e+00-Inf]     | 1.000    | 1.000   |
| TRPV6       | 101         | 0         | 0.00%         | 196          | 0         | 0.00%         | 1.00 [0e+00-Inf]     | 1.000    | 1.000   |
| PRSS3P2     | 101         | 9         | 8.91%         | 196          | 6         | 3.06%         | 0.32 [0.13-0.79]     | 3.70E-02 | 1.000   |
| TSC2        | 101         | 0         | 0.00%         | 196          | 0         | 0.00%         | 1.00 [0e+00-Inf]     | 1.000    | 1.000   |
| TSEN15      | 101         | 0         | 0.00%         | 196          | 0         | 0.00%         | 1.00 [0e+00-Inf]     | 1.000    | 1.000   |
| TSEN54      | 101         | 0         | 0.00%         | 196          | 0         | 0.00%         | 1.00 [0e+00-Inf]     | 1.000    | 1.000   |
| TSFM        | 101         | 0         | 0.00%         | 196          | 0         | 0.00%         | 1.00 [0e+00-Inf]     | 1.000    | 1.000   |
| TSG101      | 101         | 0         | 0.00%         | 196          | 0         | 0.00%         | 1.00 [0e+00-Inf]     | 1.000    | 1.000   |
| TSHZ2       | 101         | 0         | 0.00%         | 196          | 0         | 0.00%         | 1.00 [0e+00-Inf]     | 1.000    | 1.000   |
| TSKU        | 101         | 0         | 0.00%         | 196          | 0         | 0.00%         | 1.00 [0e+00-Inf]     | 1.000    | 1.000   |
| TSNARE1     | 101         | 0         | 0.00%         | 196          | 0         | 0.00%         | 1.00 [0e+00-Inf]     | 1.000    | 1.000   |
| TSNAX-DISC1 | 101         | 0         | 0.00%         | 196          | 0         | 0.00%         | 1.00 [0e+00-Inf]     | 1.000    | 1.000   |
| TSNAX       | 101         | 0         | 0.00%         | 196          | 0         | 0.00%         | 1.00 [0e+00-Inf]     | 1.000    | 1.000   |
| TSPAN10     | 101         | 0         | 0.00%         | 196          | 0         | 0.00%         | 1.00 [0e+00-Inf]     | 1.000    | 1.000   |
| TSPAN31     | 101         | 0         | 0.00%         | 196          | 0         | 0.00%         | 1.00 [0e+00-Inf]     | 1.000    | 1.000   |
| TSPAN8      | 101         | 0         | 0.00%         | 196          | 0         | 0.00%         | 1.00 [0e+00-Inf]     | 1.000    | 1.000   |
| TSPY1       | 101         | 64        | 63.37%        | 196          | 116       | 59.18%        | 0.84 [0.55-1.27]     | 0.485    | 1.000   |
| TSPY2       | 101         | 63        | 62.38%        | 196          | 111       | 56.63%        | 0.79 [0.52-1.19]     | 0.342    | 1.000   |
| TSPY3       | 101         | 64        | 63.37%        | 196          | 116       | 59.18%        | 0.84 [0.55-1.27]     | 0.485    | 1.000   |
| TSPY4       | 101         | 64        | 63.37%        | 196          | 116       | 59.18%        | 0.84 [0.55-1.27]     | 0.485    | 1.000   |
| TSPYL5      | 101         | 0         | 0.00%         | 196          | 0         | 0.00%         | 1.00 [0e+00-Inf]     | 1.000    | 1.000   |
| TSTA3       | 101         | 0         | 0.00%         | 196          | 0         | 0.00%         | 1.00 [0e+00-Inf]     | 1.000    | 1.000   |
| TSTD1       | 101         | 0         | 0.00%         | 196          | 0         | 0.00%         | 1.00 [0e+00-Inf]     | 1.000    | 1.000   |
| TTC13       | 101         | 0         | 0.00%         | 196          | 0         | 0.00%         | 1.00 [0e+00-Inf]     | 1.000    | 1.000   |
| TTC14       | 101         | 0         | 0.00%         | 196          | 0         | 0.00%         | 1.00 [0e+00-Inf]     | 1.000    | 1.000   |
| TTC23       | 101         | 0         | 0.00%         | 196          | 0         | 0.00%         | 1.00 [0e+00-Inf]     | 1.000    | 1.000   |
| TTC24       | 101         | 0         | 0.00%         | 196          | 0         | 0.00%         | 1.00 [0e+00-Inf]     | 1.000    | 1.000   |
| EMC2        | 101         | 0         | 0.00%         | 196          | 0         | 0.00%         | 1.00 [0e+00-Inf]     | 1.000    | 1.000   |
| TTL6        | 101         | 0         | 0.00%         | 196          | 0         | 0.00%         | 1.00 [0e+00-Inf]     | 1.000    | 1.000   |
| TTPAL       | 101         | 0         | 0.00%         | 196          | 0         | 0.00%         | 1.00 [0e+00-Inf]     | 1.000    | 1.000   |
| TTPA        | 101         | 0         | 0.00%         | 196          | 0         | 0.00%         | 1.00 [0e+00-Inf]     | 1.000    | 1.000   |
| TTY10       | 101         | 64        | 63.37%        | 196          | 116       | 59.18%        | 0.84 [0.55-1.27]     | 0.485    | 1.000   |
| TTY11       | 101         | 64        | 63.37%        | 196          | 116       | 59.18%        | 0.84 [0.55-1.27]     | 0.485    | 1.000   |
| TTY12       | 101         | 64        | 63.37%        | 196          | 116       | 59.18%        | 0.84 [0.55-1.27]     | 0.485    | 1.000   |
| TTY13       | 101         | 65        | 64.36%        | 196          | 117       | 59.69%        | 0.82 [0.54-1.25]     | 0.435    | 1.000   |
| TTY15       | 101         | 64        | 63.37%        | 196          | 115       | 58.67%        | 0.82 [0.54-1.24]     | 0.434    | 1.000   |
| TTY16       | 101         | 64        | 63.37%        | 196          | 116       | 59.18%        | 0.84 [0.55-1.27]     | 0.485    | 1.000   |
| TTY17A      | 101         | 64        | 63.37%        | 196          | 112       | 57.14%        | 0.77 [0.51-1.17]     | 0.302    | 1.000   |
| TTY17B      | 101         | 64        | 63.37%        | 196          | 112       | 57.14%        | 0.77 [0.51-1.17]     | 0.302    | 1.000   |
| TTY18       | 101         | 64        | 63.37%        | 196          | 116       | 59.18%        | 0.84 [0.55-1.27]     | 0.485    | 1.000   |
| TTY19       | 101         | 64        | 63.37%        | 196          | 116       | 59.18%        | 0.84 [0.55-1.27]     | 0.485    | 1.000   |
| TTY1B       | 101         | 64        | 63.37%        | 196          | 116       | 59.18%        | 0.84 [0.55-1.27]     | 0.485    | 1.000   |
| TTY20       | 101         | 64        | 63.37%        | 196          | 116       | 59.18%        | 0.84 [0.55-1.27]     | 0.485    | 1.000   |
| TTY21       | 101         | 64        | 63.37%        | 196          | 116       | 59.18%        | 0.84 [0.55-1.27]     | 0.485    | 1.000   |
| TTY22       | 101         | 64        | 63.37%        | 196          | 116       | 59.18%        | 0.84 [0.55-1.27]     | 0.485    | 1.000   |
| TTY23       | 101         | 63        | 62.38%        | 196          | 114       | 58.16%        | 0.84 [0.55-1.27]     | 0.484    | 1.000   |
| TTY2        | 101         | 64        | 63.37%        | 196          | 116       | 59.18%        | 0.84 [0.55-1.27]     | 0.485    | 1.000   |
| TTY3B       | 101         | 66        | 65.35%        | 196          | 117       | 59.69%        | 0.79 [0.52-1.19]     | 0.343    | 1.000   |
| TTY4C       | 101         | 65        | 64.36%        | 196          | 117       | 59.69%        | 0.82 [0.54-1.25]     | 0.435    | 1.000   |
| TTY5        | 101         | 65        | 64.36%        | 196          | 117       | 59.69%        | 0.82 [0.54-1.25]     | 0.435    | 1.000   |
| TTY6B       | 101         | 65        | 64.36%        | 196          | 117       | 59.69%        | 0.82 [0.54-1.25]     | 0.435    | 1.000   |

| Symbol    | CINSARC Low |           |               | CINSARC High |           |               | CINSARC High vs. Low |          |         |
|-----------|-------------|-----------|---------------|--------------|-----------|---------------|----------------------|----------|---------|
|           | N tested    | N altered | Fq alteration | N tested     | N altered | Fq alteration | OR [95%CI]           | p-value* | q-value |
| TTY6      | 101         | 65        | 64.36%        | 196          | 117       | 59.69%        | 0.82 [0.54-1.25]     | 0.435    | 1.000   |
| TTY7      | 101         | 64        | 63.37%        | 196          | 116       | 59.18%        | 0.84 [0.55-1.27]     | 0.485    | 1.000   |
| TTY8      | 101         | 64        | 63.37%        | 196          | 116       | 59.18%        | 0.84 [0.55-1.27]     | 0.485    | 1.000   |
| TTY9B     | 101         | 65        | 64.36%        | 196          | 117       | 59.69%        | 0.82 [0.54-1.25]     | 0.435    | 1.000   |
| TTYH2     | 101         | 0         | 0.00%         | 196          | 0         | 0.00%         | 1.00 [0e+00-Inf]     | 1.000    | 1.000   |
| TUBB1     | 101         | 0         | 0.00%         | 196          | 0         | 0.00%         | 1.00 [0e+00-Inf]     | 1.000    | 1.000   |
| TUBD1     | 101         | 0         | 0.00%         | 196          | 0         | 0.00%         | 1.00 [0e+00-Inf]     | 1.000    | 1.000   |
| TUFM      | 101         | 0         | 0.00%         | 196          | 0         | 0.00%         | 1.00 [0e+00-Inf]     | 1.000    | 1.000   |
| TUFT1     | 101         | 0         | 0.00%         | 196          | 0         | 0.00%         | 1.00 [0e+00-Inf]     | 1.000    | 1.000   |
| TXNDC11   | 101         | 0         | 0.00%         | 196          | 0         | 0.00%         | 1.00 [0e+00-Inf]     | 1.000    | 1.000   |
| TXNIP     | 101         | 0         | 0.00%         | 196          | 0         | 0.00%         | 1.00 [0e+00-Inf]     | 1.000    | 1.000   |
| U2AF2     | 101         | 0         | 0.00%         | 196          | 0         | 0.00%         | 1.00 [0e+00-Inf]     | 1.000    | 1.000   |
| UAP1      | 101         | 0         | 0.00%         | 196          | 0         | 0.00%         | 1.00 [0e+00-Inf]     | 1.000    | 1.000   |
| UBAP2L    | 101         | 0         | 0.00%         | 196          | 0         | 0.00%         | 1.00 [0e+00-Inf]     | 1.000    | 1.000   |
| UBE2C     | 101         | 0         | 0.00%         | 196          | 0         | 0.00%         | 1.00 [0e+00-Inf]     | 1.000    | 1.000   |
| UBE2I     | 101         | 0         | 0.00%         | 196          | 0         | 0.00%         | 1.00 [0e+00-Inf]     | 1.000    | 1.000   |
| UBE2MP1   | 101         | 1         | 0.99%         | 196          | 0         | 0.00%         | 1.6e-08 [0e+00-Inf]  | 0.996    | 1.000   |
| UBE2N     | 101         | 0         | 0.00%         | 196          | 0         | 0.00%         | 1.00 [0e+00-Inf]     | 1.000    | 1.000   |
| UBE2O     | 101         | 0         | 0.00%         | 196          | 0         | 0.00%         | 1.00 [0e+00-Inf]     | 1.000    | 1.000   |
| UBE2Q1    | 101         | 0         | 0.00%         | 196          | 0         | 0.00%         | 1.00 [0e+00-Inf]     | 1.000    | 1.000   |
| UBE2Q2P1  | 101         | 0         | 0.00%         | 196          | 0         | 0.00%         | 1.00 [0e+00-Inf]     | 1.000    | 1.000   |
| UBE2S     | 101         | 0         | 0.00%         | 196          | 0         | 0.00%         | 1.00 [0e+00-Inf]     | 1.000    | 1.000   |
| UBE2T     | 101         | 0         | 0.00%         | 196          | 0         | 0.00%         | 1.00 [0e+00-Inf]     | 1.000    | 1.000   |
| UBE2V1    | 101         | 0         | 0.00%         | 196          | 0         | 0.00%         | 1.00 [0e+00-Inf]     | 1.000    | 1.000   |
| UBE2V2    | 101         | 0         | 0.00%         | 196          | 0         | 0.00%         | 1.00 [0e+00-Inf]     | 1.000    | 1.000   |
| UBE2W     | 101         | 0         | 0.00%         | 196          | 0         | 0.00%         | 1.00 [0e+00-Inf]     | 1.000    | 1.000   |
| UBE2Z     | 101         | 0         | 0.00%         | 196          | 0         | 0.00%         | 1.00 [0e+00-Inf]     | 1.000    | 1.000   |
| UBFD1     | 101         | 0         | 0.00%         | 196          | 0         | 0.00%         | 1.00 [0e+00-Inf]     | 1.000    | 1.000   |
| UBL3      | 101         | 0         | 0.00%         | 196          | 0         | 0.00%         | 1.00 [0e+00-Inf]     | 1.000    | 1.000   |
| UBN1      | 101         | 0         | 0.00%         | 196          | 0         | 0.00%         | 1.00 [0e+00-Inf]     | 1.000    | 1.000   |
| UBQLN4    | 101         | 0         | 0.00%         | 196          | 0         | 0.00%         | 1.00 [0e+00-Inf]     | 1.000    | 1.000   |
| UBR5      | 101         | 0         | 0.00%         | 196          | 0         | 0.00%         | 1.00 [0e+00-Inf]     | 1.000    | 1.000   |
| UBTFL1    | 101         | 0         | 0.00%         | 196          | 0         | 0.00%         | 1.00 [0e+00-Inf]     | 1.000    | 1.000   |
| UBXN2B    | 101         | 0         | 0.00%         | 196          | 0         | 0.00%         | 1.00 [0e+00-Inf]     | 1.000    | 1.000   |
| UBXN7     | 101         | 0         | 0.00%         | 196          | 0         | 0.00%         | 1.00 [0e+00-Inf]     | 1.000    | 1.000   |
| UBXN8     | 101         | 0         | 0.00%         | 196          | 0         | 0.00%         | 1.00 [0e+00-Inf]     | 1.000    | 1.000   |
| UCHL5     | 101         | 0         | 0.00%         | 196          | 0         | 0.00%         | 1.00 [0e+00-Inf]     | 1.000    | 1.000   |
| UCK2      | 101         | 0         | 0.00%         | 196          | 0         | 0.00%         | 1.00 [0e+00-Inf]     | 1.000    | 1.000   |
| UCKL1-AS1 | 101         | 0         | 0.00%         | 196          | 0         | 0.00%         | 1.00 [0e+00-Inf]     | 1.000    | 1.000   |
| UCKL1     | 101         | 0         | 0.00%         | 196          | 0         | 0.00%         | 1.00 [0e+00-Inf]     | 1.000    | 1.000   |
| UCP2      | 101         | 0         | 0.00%         | 196          | 0         | 0.00%         | 1.00 [0e+00-Inf]     | 1.000    | 1.000   |
| UCP3      | 101         | 0         | 0.00%         | 196          | 0         | 0.00%         | 1.00 [0e+00-Inf]     | 1.000    | 1.000   |
| UFC1      | 101         | 0         | 0.00%         | 196          | 0         | 0.00%         | 1.00 [0e+00-Inf]     | 1.000    | 1.000   |
| UHMK1     | 101         | 0         | 0.00%         | 196          | 0         | 0.00%         | 1.00 [0e+00-Inf]     | 1.000    | 1.000   |
| ULK2      | 101         | 0         | 0.00%         | 196          | 0         | 0.00%         | 1.00 [0e+00-Inf]     | 1.000    | 1.000   |
| UMOD      | 101         | 0         | 0.00%         | 196          | 0         | 0.00%         | 1.00 [0e+00-Inf]     | 1.000    | 1.000   |
| UNC119    | 101         | 0         | 0.00%         | 196          | 0         | 0.00%         | 1.00 [0e+00-Inf]     | 1.000    | 1.000   |
| UNC13D    | 101         | 0         | 0.00%         | 196          | 0         | 0.00%         | 1.00 [0e+00-Inf]     | 1.000    | 1.000   |
| UNC45A    | 101         | 0         | 0.00%         | 196          | 0         | 0.00%         | 1.00 [0e+00-Inf]     | 1.000    | 1.000   |
| UNC45B    | 101         | 0         | 0.00%         | 196          | 0         | 0.00%         | 1.00 [0e+00-Inf]     | 1.000    | 1.000   |
| UNC5D     | 101         | 0         | 0.00%         | 196          | 0         | 0.00%         | 1.00 [0e+00-Inf]     | 1.000    | 1.000   |
| UNC93B1   | 101         | 0         | 0.00%         | 196          | 0         | 0.00%         | 1.00 [0e+00-Inf]     | 1.000    | 1.000   |
| UNKL      | 101         | 0         | 0.00%         | 196          | 0         | 0.00%         | 1.00 [0e+00-Inf]     | 1.000    | 1.000   |
| UNK       | 101         | 0         | 0.00%         | 196          | 0         | 0.00%         | 1.00 [0e+00-Inf]     | 1.000    | 1.000   |
| UQCC1     | 101         | 0         | 0.00%         | 196          | 0         | 0.00%         | 1.00 [0e+00-Inf]     | 1.000    | 1.000   |
| UQCRB     | 101         | 0         | 0.00%         | 196          | 0         | 0.00%         | 1.00 [0e+00-Inf]     | 1.000    | 1.000   |
| UQCRC2    | 101         | 0         | 0.00%         | 196          | 0         | 0.00%         | 1.00 [0e+00-Inf]     | 1.000    | 1.000   |
| URB2      | 101         | 0         | 0.00%         | 196          | 0         | 0.00%         | 1.00 [0e+00-Inf]     | 1.000    | 1.000   |
| USF1      | 101         | 0         | 0.00%         | 196          | 0         | 0.00%         | 1.00 [0e+00-Inf]     | 1.000    | 1.000   |
| USH1C     | 101         | 0         | 0.00%         | 196          | 0         | 0.00%         | 1.00 [0e+00-Inf]     | 1.000    | 1.000   |
| USH1G     | 101         | 0         | 0.00%         | 196          | 0         | 0.00%         | 1.00 [0e+00-Inf]     | 1.000    | 1.000   |
| USH2A     | 101         | 0         | 0.00%         | 196          | 1         | 0.51%         | 3.2e+07 [0e+00-Inf]  | 0.997    | 1.000   |
| USO1      | 101         | 0         | 0.00%         | 196          | 0         | 0.00%         | 1.00 [0e+00-Inf]     | 1.000    | 1.000   |
| USP13     | 101         | 0         | 0.00%         | 196          | 0         | 0.00%         | 1.00 [0e+00-Inf]     | 1.000    | 1.000   |
| USP17L2   | 101         | 1         | 0.99%         | 196          | 1         | 0.51%         | 0.51 [0.05-5.30]     | 0.638    | 1.000   |
| USP21     | 101         | 0         | 0.00%         | 196          | 0         | 0.00%         | 1.00 [0e+00-Inf]     | 1.000    | 1.000   |
| USP31     | 101         | 0         | 0.00%         | 196          | 0         | 0.00%         | 1.00 [0e+00-Inf]     | 1.000    | 1.000   |
| USP32     | 101         | 0         | 0.00%         | 196          | 0         | 0.00%         | 1.00 [0e+00-Inf]     | 1.000    | 1.000   |
| USP35     | 101         | 0         | 0.00%         | 196          | 0         | 0.00%         | 1.00 [0e+00-Inf]     | 1.000    | 1.000   |
| USP36     | 101         | 0         | 0.00%         | 196          | 0         | 0.00%         | 1.00 [0e+00-Inf]     | 1.000    | 1.000   |
| USP54     | 101         | 0         | 0.00%         | 196          | 0         | 0.00%         | 1.00 [0e+00-Inf]     | 1.000    | 1.000   |

| Symbol  | CINSARC Low |           |               | CINSARC High |           |               | CINSARC High vs. Low |          |         |
|---------|-------------|-----------|---------------|--------------|-----------|---------------|----------------------|----------|---------|
|         | N tested    | N altered | Fq alteration | N tested     | N altered | Fq alteration | OR [95%CI]           | p-value* | q-value |
| USP7    | 101         | 0         | 0.00%         | 196          | 0         | 0.00%         | 1.00 [0e+00-Inf]     | 1.000    | 1.000   |
| USP9Y   | 101         | 64        | 63.37%        | 196          | 115       | 58.67%        | 0.82 [0.54-1.24]     | 0.434    | 1.000   |
| USP11   | 101         | 0         | 0.00%         | 196          | 0         | 0.00%         | 1.00 [0e+00-Inf]     | 1.000    | 1.000   |
| UTP18   | 101         | 0         | 0.00%         | 196          | 0         | 0.00%         | 1.00 [0e+00-Inf]     | 1.000    | 1.000   |
| UTP23   | 101         | 0         | 0.00%         | 196          | 0         | 0.00%         | 1.00 [0e+00-Inf]     | 1.000    | 1.000   |
| UTS2B   | 101         | 0         | 0.00%         | 196          | 0         | 0.00%         | 1.00 [0e+00-Inf]     | 1.000    | 1.000   |
| UTS2R   | 101         | 0         | 0.00%         | 196          | 0         | 0.00%         | 1.00 [0e+00-Inf]     | 1.000    | 1.000   |
| UTY     | 101         | 64        | 63.37%        | 196          | 115       | 58.67%        | 0.82 [0.54-1.24]     | 0.434    | 1.000   |
| UVRAG   | 101         | 0         | 0.00%         | 196          | 0         | 0.00%         | 1.00 [0e+00-Inf]     | 1.000    | 1.000   |
| VAMP4   | 101         | 0         | 0.00%         | 196          | 0         | 0.00%         | 1.00 [0e+00-Inf]     | 1.000    | 1.000   |
| VANGL2  | 101         | 0         | 0.00%         | 196          | 0         | 0.00%         | 1.00 [0e+00-Inf]     | 1.000    | 1.000   |
| VAPB    | 101         | 0         | 0.00%         | 196          | 0         | 0.00%         | 1.00 [0e+00-Inf]     | 1.000    | 1.000   |
| VASH2   | 101         | 0         | 0.00%         | 196          | 0         | 0.00%         | 1.00 [0e+00-Inf]     | 1.000    | 1.000   |
| VASN    | 101         | 0         | 0.00%         | 196          | 0         | 0.00%         | 1.00 [0e+00-Inf]     | 1.000    | 1.000   |
| VCL     | 101         | 0         | 0.00%         | 196          | 0         | 0.00%         | 1.00 [0e+00-Inf]     | 1.000    | 1.000   |
| VCP1P1  | 101         | 0         | 0.00%         | 196          | 0         | 0.00%         | 1.00 [0e+00-Inf]     | 1.000    | 1.000   |
| VCP     | 101         | 0         | 0.00%         | 196          | 0         | 0.00%         | 1.00 [0e+00-Inf]     | 1.000    | 1.000   |
| VCY     | 101         | 64        | 63.37%        | 196          | 116       | 59.18%        | 0.84 [0.55-1.27]     | 0.485    | 1.000   |
| VDAC2   | 101         | 0         | 0.00%         | 196          | 0         | 0.00%         | 1.00 [0e+00-Inf]     | 1.000    | 1.000   |
| VDAC3   | 101         | 0         | 0.00%         | 196          | 0         | 0.00%         | 1.00 [0e+00-Inf]     | 1.000    | 1.000   |
| VEZF1   | 101         | 0         | 0.00%         | 196          | 0         | 0.00%         | 1.00 [0e+00-Inf]     | 1.000    | 1.000   |
| VHLL    | 101         | 0         | 0.00%         | 196          | 0         | 0.00%         | 1.00 [0e+00-Inf]     | 1.000    | 1.000   |
| VKORC1  | 101         | 0         | 0.00%         | 196          | 0         | 0.00%         | 1.00 [0e+00-Inf]     | 1.000    | 1.000   |
| VN1R5   | 101         | 0         | 0.00%         | 196          | 0         | 0.00%         | 1.00 [0e+00-Inf]     | 1.000    | 1.000   |
| VPS13B  | 101         | 0         | 0.00%         | 196          | 0         | 0.00%         | 1.00 [0e+00-Inf]     | 1.000    | 1.000   |
| VPS28   | 101         | 1         | 0.99%         | 196          | 0         | 0.00%         | 1.6e-08 [0e+00-Inf]  | 0.996    | 1.000   |
| VPS37C  | 101         | 0         | 0.00%         | 196          | 0         | 0.00%         | 1.00 [0e+00-Inf]     | 1.000    | 1.000   |
| VPS41   | 101         | 0         | 0.00%         | 196          | 0         | 0.00%         | 1.00 [0e+00-Inf]     | 1.000    | 1.000   |
| VPS45   | 101         | 0         | 0.00%         | 196          | 0         | 0.00%         | 1.00 [0e+00-Inf]     | 1.000    | 1.000   |
| VPS4B   | 101         | 0         | 0.00%         | 196          | 0         | 0.00%         | 1.00 [0e+00-Inf]     | 1.000    | 1.000   |
| VPS72   | 101         | 0         | 0.00%         | 196          | 0         | 0.00%         | 1.00 [0e+00-Inf]     | 1.000    | 1.000   |
| VPS8    | 101         | 0         | 0.00%         | 196          | 0         | 0.00%         | 1.00 [0e+00-Inf]     | 1.000    | 1.000   |
| VSIG8   | 101         | 0         | 0.00%         | 196          | 0         | 0.00%         | 1.00 [0e+00-Inf]     | 1.000    | 1.000   |
| VSTM2L  | 101         | 0         | 0.00%         | 196          | 0         | 0.00%         | 1.00 [0e+00-Inf]     | 1.000    | 1.000   |
| VTN     | 101         | 0         | 0.00%         | 196          | 0         | 0.00%         | 1.00 [0e+00-Inf]     | 1.000    | 1.000   |
| VWA3A   | 101         | 0         | 0.00%         | 196          | 0         | 0.00%         | 1.00 [0e+00-Inf]     | 1.000    | 1.000   |
| VWASB2  | 101         | 0         | 0.00%         | 196          | 0         | 0.00%         | 1.00 [0e+00-Inf]     | 1.000    | 1.000   |
| VWCE    | 101         | 0         | 0.00%         | 196          | 0         | 0.00%         | 1.00 [0e+00-Inf]     | 1.000    | 1.000   |
| WBP2    | 101         | 0         | 0.00%         | 196          | 0         | 0.00%         | 1.00 [0e+00-Inf]     | 1.000    | 1.000   |
| WDR24   | 101         | 0         | 0.00%         | 196          | 0         | 0.00%         | 1.00 [0e+00-Inf]     | 1.000    | 1.000   |
| WDR26   | 101         | 0         | 0.00%         | 196          | 0         | 0.00%         | 1.00 [0e+00-Inf]     | 1.000    | 1.000   |
| WDR45B  | 101         | 0         | 0.00%         | 196          | 0         | 0.00%         | 1.00 [0e+00-Inf]     | 1.000    | 1.000   |
| WDR53   | 101         | 0         | 0.00%         | 196          | 0         | 0.00%         | 1.00 [0e+00-Inf]     | 1.000    | 1.000   |
| WDR64   | 101         | 0         | 0.00%         | 196          | 0         | 0.00%         | 1.00 [0e+00-Inf]     | 1.000    | 1.000   |
| TBC1D31 | 101         | 0         | 0.00%         | 196          | 0         | 0.00%         | 1.00 [0e+00-Inf]     | 1.000    | 1.000   |
| WDR73   | 101         | 0         | 0.00%         | 196          | 0         | 0.00%         | 1.00 [0e+00-Inf]     | 1.000    | 1.000   |
| WDR90   | 101         | 0         | 0.00%         | 196          | 0         | 0.00%         | 1.00 [0e+00-Inf]     | 1.000    | 1.000   |
| WDR93   | 101         | 0         | 0.00%         | 196          | 0         | 0.00%         | 1.00 [0e+00-Inf]     | 1.000    | 1.000   |
| WDYHV1  | 101         | 0         | 0.00%         | 196          | 0         | 0.00%         | 1.00 [0e+00-Inf]     | 1.000    | 1.000   |
| WFDC10A | 101         | 0         | 0.00%         | 196          | 0         | 0.00%         | 1.00 [0e+00-Inf]     | 1.000    | 1.000   |
| WFDC10B | 101         | 0         | 0.00%         | 196          | 0         | 0.00%         | 1.00 [0e+00-Inf]     | 1.000    | 1.000   |
| WFDC11  | 101         | 0         | 0.00%         | 196          | 0         | 0.00%         | 1.00 [0e+00-Inf]     | 1.000    | 1.000   |
| WFDC12  | 101         | 0         | 0.00%         | 196          | 0         | 0.00%         | 1.00 [0e+00-Inf]     | 1.000    | 1.000   |
| WFDC13  | 101         | 0         | 0.00%         | 196          | 0         | 0.00%         | 1.00 [0e+00-Inf]     | 1.000    | 1.000   |
| WFDC2   | 101         | 0         | 0.00%         | 196          | 0         | 0.00%         | 1.00 [0e+00-Inf]     | 1.000    | 1.000   |
| WFDC3   | 101         | 0         | 0.00%         | 196          | 0         | 0.00%         | 1.00 [0e+00-Inf]     | 1.000    | 1.000   |
| WFDC5   | 101         | 0         | 0.00%         | 196          | 0         | 0.00%         | 1.00 [0e+00-Inf]     | 1.000    | 1.000   |
| WFDC6   | 101         | 0         | 0.00%         | 196          | 0         | 0.00%         | 1.00 [0e+00-Inf]     | 1.000    | 1.000   |
| WFDC8   | 101         | 0         | 0.00%         | 196          | 0         | 0.00%         | 1.00 [0e+00-Inf]     | 1.000    | 1.000   |
| WFDC9   | 101         | 0         | 0.00%         | 196          | 0         | 0.00%         | 1.00 [0e+00-Inf]     | 1.000    | 1.000   |
| WFIKKN1 | 101         | 0         | 0.00%         | 196          | 0         | 0.00%         | 1.00 [0e+00-Inf]     | 1.000    | 1.000   |
| WFIKKN2 | 101         | 0         | 0.00%         | 196          | 0         | 0.00%         | 1.00 [0e+00-Inf]     | 1.000    | 1.000   |
| WHAMM   | 101         | 0         | 0.00%         | 196          | 0         | 0.00%         | 1.00 [0e+00-Inf]     | 1.000    | 1.000   |
| WIF1    | 101         | 0         | 0.00%         | 196          | 0         | 0.00%         | 1.00 [0e+00-Inf]     | 1.000    | 1.000   |
| WIPF2   | 101         | 0         | 0.00%         | 196          | 0         | 0.00%         | 1.00 [0e+00-Inf]     | 1.000    | 1.000   |
| WIPF3   | 101         | 0         | 0.00%         | 196          | 0         | 0.00%         | 1.00 [0e+00-Inf]     | 1.000    | 1.000   |
| WIP1    | 101         | 0         | 0.00%         | 196          | 0         | 0.00%         | 1.00 [0e+00-Inf]     | 1.000    | 1.000   |
| WNT11   | 101         | 0         | 0.00%         | 196          | 0         | 0.00%         | 1.00 [0e+00-Inf]     | 1.000    | 1.000   |
| WNT3A   | 101         | 0         | 0.00%         | 196          | 0         | 0.00%         | 1.00 [0e+00-Inf]     | 1.000    | 1.000   |
| WNT3    | 101         | 0         | 0.00%         | 196          | 0         | 0.00%         | 1.00 [0e+00-Inf]     | 1.000    | 1.000   |
| WNT9A   | 101         | 0         | 0.00%         | 196          | 0         | 0.00%         | 1.00 [0e+00-Inf]     | 1.000    | 1.000   |

| Symbol   | CINSARC Low |           |               | CINSARC High |           |               | CINSARC High vs. Low |          |         |
|----------|-------------|-----------|---------------|--------------|-----------|---------------|----------------------|----------|---------|
|          | N tested    | N altered | Fq alteration | N tested     | N altered | Fq alteration | OR [95%CI]           | p-value* | q-value |
| WNT9B    | 101         | 0         | 0.00%         | 196          | 0         | 0.00%         | 1.00 [0e+00-Inf]     | 1.000    | 1.000   |
| WRN      | 101         | 0         | 0.00%         | 196          | 0         | 0.00%         | 1.00 [0e+00-Inf]     | 1.000    | 1.000   |
| WSB1     | 101         | 0         | 0.00%         | 196          | 0         | 0.00%         | 1.00 [0e+00-Inf]     | 1.000    | 1.000   |
| WWP1     | 101         | 0         | 0.00%         | 196          | 0         | 0.00%         | 1.00 [0e+00-Inf]     | 1.000    | 1.000   |
| XCL1     | 101         | 0         | 0.00%         | 196          | 0         | 0.00%         | 1.00 [0e+00-Inf]     | 1.000    | 1.000   |
| XCL2     | 101         | 0         | 0.00%         | 196          | 0         | 0.00%         | 1.00 [0e+00-Inf]     | 1.000    | 1.000   |
| XKR4     | 101         | 0         | 0.00%         | 196          | 0         | 0.00%         | 1.00 [0e+00-Inf]     | 1.000    | 1.000   |
| XKR9     | 101         | 0         | 0.00%         | 196          | 0         | 0.00%         | 1.00 [0e+00-Inf]     | 1.000    | 1.000   |
| XKRY2    | 101         | 65        | 64.36%        | 196          | 117       | 59.69%        | 0.82 [0.54-1.25]     | 0.435    | 1.000   |
| XKRY     | 101         | 65        | 64.36%        | 196          | 117       | 59.69%        | 0.82 [0.54-1.25]     | 0.435    | 1.000   |
| XPO6     | 101         | 0         | 0.00%         | 196          | 0         | 0.00%         | 1.00 [0e+00-Inf]     | 1.000    | 1.000   |
| XPOT     | 101         | 0         | 0.00%         | 196          | 0         | 0.00%         | 1.00 [0e+00-Inf]     | 1.000    | 1.000   |
| XPR1     | 101         | 0         | 0.00%         | 196          | 0         | 0.00%         | 1.00 [0e+00-Inf]     | 1.000    | 1.000   |
| XRRA1    | 101         | 0         | 0.00%         | 196          | 0         | 0.00%         | 1.00 [0e+00-Inf]     | 1.000    | 1.000   |
| XYLT1    | 101         | 0         | 0.00%         | 196          | 0         | 0.00%         | 1.00 [0e+00-Inf]     | 1.000    | 1.000   |
| XYLT2    | 101         | 0         | 0.00%         | 196          | 0         | 0.00%         | 1.00 [0e+00-Inf]     | 1.000    | 1.000   |
| YEATS2   | 101         | 0         | 0.00%         | 196          | 0         | 0.00%         | 1.00 [0e+00-Inf]     | 1.000    | 1.000   |
| YEATS4   | 101         | 0         | 0.00%         | 196          | 0         | 0.00%         | 1.00 [0e+00-Inf]     | 1.000    | 1.000   |
| YIF1A    | 101         | 0         | 0.00%         | 196          | 0         | 0.00%         | 1.00 [0e+00-Inf]     | 1.000    | 1.000   |
| YKT6     | 101         | 0         | 0.00%         | 196          | 0         | 0.00%         | 1.00 [0e+00-Inf]     | 1.000    | 1.000   |
| YOD1     | 101         | 0         | 0.00%         | 196          | 0         | 0.00%         | 1.00 [0e+00-Inf]     | 1.000    | 1.000   |
| YPEL2    | 101         | 0         | 0.00%         | 196          | 0         | 0.00%         | 1.00 [0e+00-Inf]     | 1.000    | 1.000   |
| YPEL3    | 101         | 0         | 0.00%         | 196          | 0         | 0.00%         | 1.00 [0e+00-Inf]     | 1.000    | 1.000   |
| YTHDF1   | 101         | 0         | 0.00%         | 196          | 0         | 0.00%         | 1.00 [0e+00-Inf]     | 1.000    | 1.000   |
| YTHDF3   | 101         | 0         | 0.00%         | 196          | 0         | 0.00%         | 1.00 [0e+00-Inf]     | 1.000    | 1.000   |
| YWHAB    | 101         | 0         | 0.00%         | 196          | 0         | 0.00%         | 1.00 [0e+00-Inf]     | 1.000    | 1.000   |
| YWHAZ    | 101         | 0         | 0.00%         | 196          | 0         | 0.00%         | 1.00 [0e+00-Inf]     | 1.000    | 1.000   |
| YY1AP1   | 101         | 0         | 0.00%         | 196          | 0         | 0.00%         | 1.00 [0e+00-Inf]     | 1.000    | 1.000   |
| ZACN     | 101         | 0         | 0.00%         | 196          | 0         | 0.00%         | 1.00 [0e+00-Inf]     | 1.000    | 1.000   |
| ZBP1     | 101         | 0         | 0.00%         | 196          | 0         | 0.00%         | 1.00 [0e+00-Inf]     | 1.000    | 1.000   |
| ZBTB10   | 101         | 0         | 0.00%         | 196          | 0         | 0.00%         | 1.00 [0e+00-Inf]     | 1.000    | 1.000   |
| ZBTB37   | 101         | 0         | 0.00%         | 196          | 0         | 0.00%         | 1.00 [0e+00-Inf]     | 1.000    | 1.000   |
| ZBTB41   | 101         | 0         | 0.00%         | 196          | 0         | 0.00%         | 1.00 [0e+00-Inf]     | 1.000    | 1.000   |
| ZBTB46   | 101         | 0         | 0.00%         | 196          | 0         | 0.00%         | 1.00 [0e+00-Inf]     | 1.000    | 1.000   |
| ZBTB7B   | 101         | 0         | 0.00%         | 196          | 0         | 0.00%         | 1.00 [0e+00-Inf]     | 1.000    | 1.000   |
| ZC3H11A  | 101         | 0         | 0.00%         | 196          | 0         | 0.00%         | 1.00 [0e+00-Inf]     | 1.000    | 1.000   |
| ZC3H3    | 101         | 0         | 0.00%         | 196          | 0         | 0.00%         | 1.00 [0e+00-Inf]     | 1.000    | 1.000   |
| ZC3H7A   | 101         | 0         | 0.00%         | 196          | 0         | 0.00%         | 1.00 [0e+00-Inf]     | 1.000    | 1.000   |
| ZCCHC2   | 101         | 0         | 0.00%         | 196          | 0         | 0.00%         | 1.00 [0e+00-Inf]     | 1.000    | 1.000   |
| ZDHHHC17 | 101         | 0         | 0.00%         | 196          | 0         | 0.00%         | 1.00 [0e+00-Inf]     | 1.000    | 1.000   |
| ZDHHHC19 | 101         | 0         | 0.00%         | 196          | 0         | 0.00%         | 1.00 [0e+00-Inf]     | 1.000    | 1.000   |
| ZDHHHC24 | 101         | 0         | 0.00%         | 196          | 0         | 0.00%         | 1.00 [0e+00-Inf]     | 1.000    | 1.000   |
| ZFAND1   | 101         | 0         | 0.00%         | 196          | 0         | 0.00%         | 1.00 [0e+00-Inf]     | 1.000    | 1.000   |
| ZFAT-AS1 | 101         | 0         | 0.00%         | 196          | 0         | 0.00%         | 1.00 [0e+00-Inf]     | 1.000    | 1.000   |
| ZFAT     | 101         | 0         | 0.00%         | 196          | 0         | 0.00%         | 1.00 [0e+00-Inf]     | 1.000    | 1.000   |
| ZFC3H1   | 101         | 0         | 0.00%         | 196          | 0         | 0.00%         | 1.00 [0e+00-Inf]     | 1.000    | 1.000   |
| ZFHX4    | 101         | 0         | 0.00%         | 196          | 0         | 0.00%         | 1.00 [0e+00-Inf]     | 1.000    | 1.000   |
| ZFP41    | 101         | 0         | 0.00%         | 196          | 0         | 0.00%         | 1.00 [0e+00-Inf]     | 1.000    | 1.000   |
| ZFP64    | 101         | 0         | 0.00%         | 196          | 0         | 0.00%         | 1.00 [0e+00-Inf]     | 1.000    | 1.000   |
| ZFPM2    | 101         | 0         | 0.00%         | 196          | 0         | 0.00%         | 1.00 [0e+00-Inf]     | 1.000    | 1.000   |
| ZFY      | 101         | 60        | 59.41%        | 196          | 106       | 54.08%        | 0.80 [0.54-1.21]     | 0.382    | 1.000   |
| ZG16B    | 101         | 0         | 0.00%         | 196          | 0         | 0.00%         | 1.00 [0e+00-Inf]     | 1.000    | 1.000   |
| ZG16     | 101         | 0         | 0.00%         | 196          | 0         | 0.00%         | 1.00 [0e+00-Inf]     | 1.000    | 1.000   |
| ZGPAT    | 101         | 0         | 0.00%         | 196          | 0         | 0.00%         | 1.00 [0e+00-Inf]     | 1.000    | 1.000   |
| ZHX1     | 101         | 0         | 0.00%         | 196          | 0         | 0.00%         | 1.00 [0e+00-Inf]     | 1.000    | 1.000   |
| ZHX2     | 101         | 0         | 0.00%         | 196          | 0         | 0.00%         | 1.00 [0e+00-Inf]     | 1.000    | 1.000   |
| ZHX3     | 101         | 0         | 0.00%         | 196          | 0         | 0.00%         | 1.00 [0e+00-Inf]     | 1.000    | 1.000   |
| ZKSCAN2  | 101         | 0         | 0.00%         | 196          | 0         | 0.00%         | 1.00 [0e+00-Inf]     | 1.000    | 1.000   |
| ZMAT3    | 101         | 0         | 0.00%         | 196          | 0         | 0.00%         | 1.00 [0e+00-Inf]     | 1.000    | 1.000   |
| ZMAT4    | 101         | 0         | 0.00%         | 196          | 0         | 0.00%         | 1.00 [0e+00-Inf]     | 1.000    | 1.000   |
| MSS51    | 101         | 0         | 0.00%         | 196          | 0         | 0.00%         | 1.00 [0e+00-Inf]     | 1.000    | 1.000   |
| ZMYND8   | 101         | 0         | 0.00%         | 196          | 0         | 0.00%         | 1.00 [0e+00-Inf]     | 1.000    | 1.000   |
| ZNF124   | 101         | 0         | 0.00%         | 196          | 0         | 0.00%         | 1.00 [0e+00-Inf]     | 1.000    | 1.000   |
| ZNF160   | 101         | 0         | 0.00%         | 196          | 0         | 0.00%         | 1.00 [0e+00-Inf]     | 1.000    | 1.000   |
| ZNF16    | 101         | 0         | 0.00%         | 196          | 0         | 0.00%         | 1.00 [0e+00-Inf]     | 1.000    | 1.000   |
| ZNF174   | 101         | 0         | 0.00%         | 196          | 0         | 0.00%         | 1.00 [0e+00-Inf]     | 1.000    | 1.000   |
| ZNF200   | 101         | 0         | 0.00%         | 196          | 0         | 0.00%         | 1.00 [0e+00-Inf]     | 1.000    | 1.000   |
| ZNF205   | 101         | 0         | 0.00%         | 196          | 0         | 0.00%         | 1.00 [0e+00-Inf]     | 1.000    | 1.000   |
| ZNF213   | 101         | 0         | 0.00%         | 196          | 0         | 0.00%         | 1.00 [0e+00-Inf]     | 1.000    | 1.000   |
| ZNF217   | 101         | 0         | 0.00%         | 196          | 0         | 0.00%         | 1.00 [0e+00-Inf]     | 1.000    | 1.000   |
| ZBTB18   | 101         | 0         | 0.00%         | 196          | 0         | 0.00%         | 1.00 [0e+00-Inf]     | 1.000    | 1.000   |



| Symbol         | CINSARC Low |           |               | CINSARC High |           |               | CINSARC High vs. Low |          |         |
|----------------|-------------|-----------|---------------|--------------|-----------|---------------|----------------------|----------|---------|
|                | N tested    | N altered | Fq alteration | N tested     | N altered | Fq alteration | OR [95%CI]           | p-value* | q-value |
| <i>ZNF843</i>  | 101         | 0         | 0.00%         | 196          | 0         | 0.00%         | 1.00 [0e+00-Inf]     | 1.000    | 1.000   |
| <i>ZNFX1</i>   | 101         | 0         | 0.00%         | 196          | 0         | 0.00%         | 1.00 [0e+00-Inf]     | 1.000    | 1.000   |
| <i>ZNHIT3</i>  | 101         | 0         | 0.00%         | 196          | 0         | 0.00%         | 1.00 [0e+00-Inf]     | 1.000    | 1.000   |
| <i>ZNRF2</i>   | 101         | 0         | 0.00%         | 196          | 0         | 0.00%         | 1.00 [0e+00-Inf]     | 1.000    | 1.000   |
| <i>ZP2</i>     | 101         | 0         | 0.00%         | 196          | 0         | 0.00%         | 1.00 [0e+00-Inf]     | 1.000    | 1.000   |
| <i>ZP4</i>     | 101         | 0         | 0.00%         | 196          | 0         | 0.00%         | 1.00 [0e+00-Inf]     | 1.000    | 1.000   |
| <i>ZPBP2</i>   | 101         | 0         | 0.00%         | 196          | 0         | 0.00%         | 1.00 [0e+00-Inf]     | 1.000    | 1.000   |
| <i>ZSCAN10</i> | 101         | 0         | 0.00%         | 196          | 0         | 0.00%         | 1.00 [0e+00-Inf]     | 1.000    | 1.000   |
| <i>ZSCAN2</i>  | 101         | 0         | 0.00%         | 196          | 0         | 0.00%         | 1.00 [0e+00-Inf]     | 1.000    | 1.000   |
| <i>ZSWIM1</i>  | 101         | 0         | 0.00%         | 196          | 0         | 0.00%         | 1.00 [0e+00-Inf]     | 1.000    | 1.000   |
| <i>ZSWIM3</i>  | 101         | 0         | 0.00%         | 196          | 0         | 0.00%         | 1.00 [0e+00-Inf]     | 1.000    | 1.000   |



**a** **Supervised analysis**  
**CINSARC high- vs low-risk**

**TCGA, Learning**

297 Luminal B samples

Moderated t-test

( $p < 5\%$ ,  $q < 10\%$  &  $|FC| > 1.5x$ ) : **510 genes**

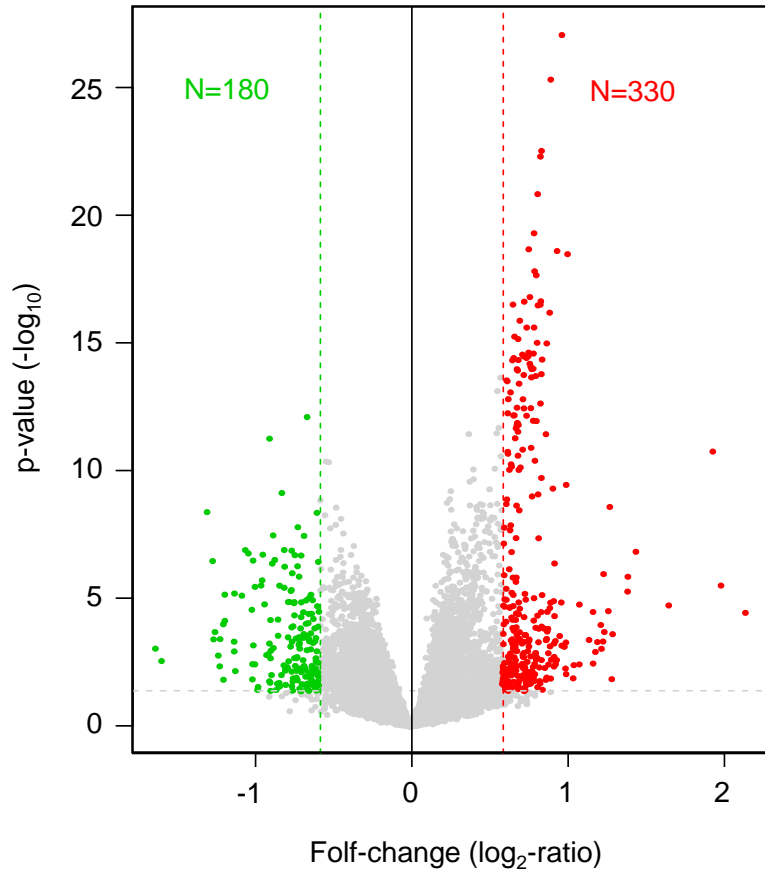

**b**

**TCGA: learning**

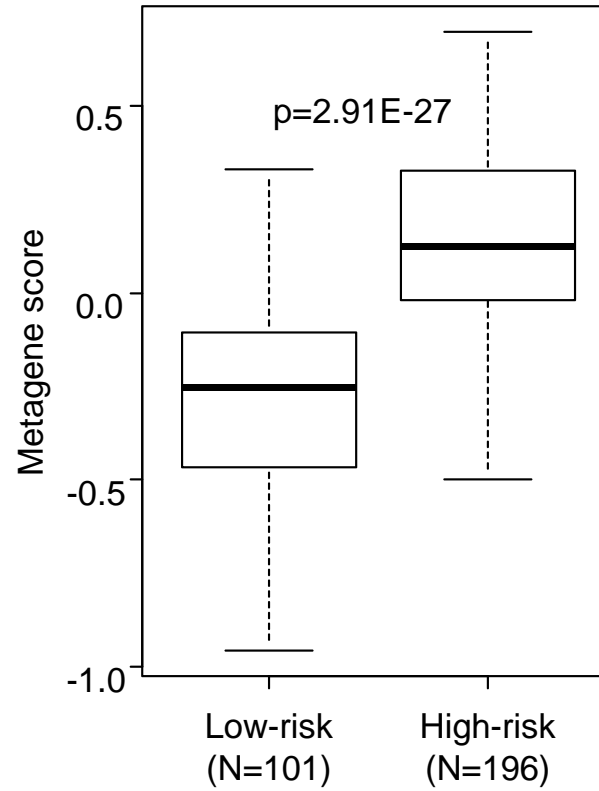

**METABRIC: validation**

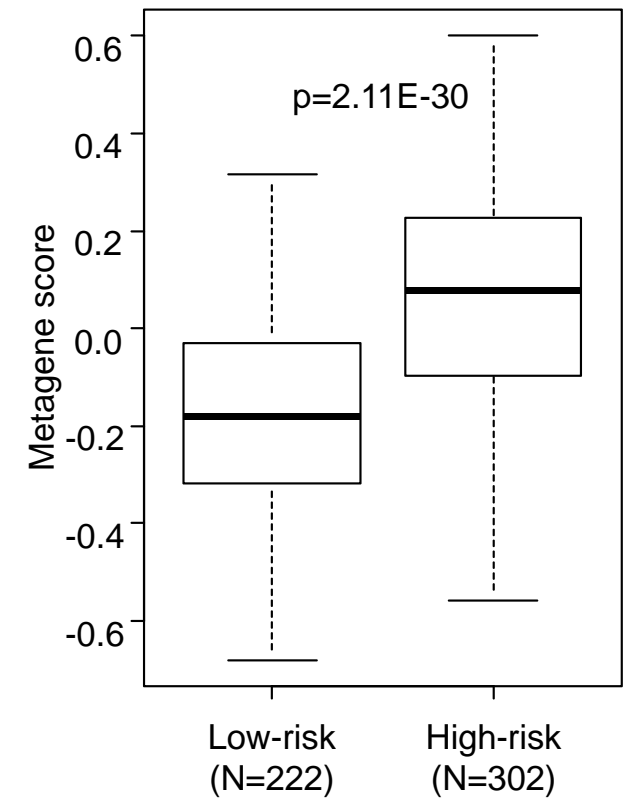

**Supplementary Figure 1: Identification and validation of 510 genes differentially expressed between the two CINSARC classes in Luminal B breast cancers.**

a/ Identification of the signature in the TCGA data set (N=297). Volcano-plot showing the 510 genes differentially expressed between the two CINSARC classes. b/ Box plot of the 510-gene metagene in the learning set (TCGA) and the validation set (METABRIC). The p-value is for the Student t-test.

Supplementary Table 7: List of 510 genes differentially expressed between the two CINSARC classes in Luminal B breast cancers.

| Symbol   | description                    | Cytoband | Entrez Gene ID | Low-risk (mean_log2) | High-risk (mean_log2) | High vs.Low (log2-ratio) | t     | p-value  | q-value  | Associated to           |
|----------|--------------------------------|----------|----------------|----------------------|-----------------------|--------------------------|-------|----------|----------|-------------------------|
| CENPA    | centromere protein A           | 2p23.3   | 1058           | 6.31                 | 7.27                  | 0.97                     | 12.13 | 8.31E-28 | 8.89E-24 | up CINSARC High vs. Low |
| BUB1     | BUB1 mitotic checkpoint st     | 2q13     | 699            | 8.41                 | 9.31                  | 0.90                     | 11.64 | 4.63E-26 | 2.48E-22 | up CINSARC High vs. Low |
| NCAPH    | non-SMC condensin I com        | 2q11.2   | 23397          | 7.86                 | 8.70                  | 0.84                     | 10.83 | 2.88E-23 | 1.03E-19 | up CINSARC High vs. Low |
| HJURP    | Holliday junction recognitio   | 2q37.1   | 55355          | 7.66                 | 8.49                  | 0.83                     | 10.76 | 4.80E-23 | 1.28E-19 | up CINSARC High vs. Low |
| CCNA2    | cyclin A2                      | 4q27     | 890            | 8.46                 | 9.27                  | 0.81                     | 10.33 | 1.42E-21 | 3.03E-18 | up CINSARC High vs. Low |
| CCNB2    | cyclin B2                      | 15q22.2  | 9133           | 8.35                 | 9.14                  | 0.79                     | 9.86  | 4.83E-20 | 8.61E-17 | up CINSARC High vs. Low |
| CEP55    | centrosomal protein 55         | 10q23.33 | 55165          | 8.28                 | 9.04                  | 0.76                     | 9.67  | 2.05E-19 | 3.13E-16 | up CINSARC High vs. Low |
| BIRC5    | baculoviral IAP repeat conl    | 17q25.3  | 332            | 8.12                 | 9.06                  | 0.94                     | 9.65  | 2.40E-19 | 3.21E-16 | up CINSARC High vs. Low |
| KIF14    | kinesin family member 14       | 1q32.1   | 9928           | 7.21                 | 8.22                  | 1.00                     | 9.61  | 3.17E-19 | 3.76E-16 | up CINSARC High vs. Low |
| FOXM1    | forkhead box M1                | 12p13.33 | 2305           | 9.45                 | 10.24                 | 0.79                     | 9.40  | 1.49E-18 | 1.59E-15 | up CINSARC High vs. Low |
| DEPDC1B  | DEP domain containing 1B       | 5q12.1   | 55789          | 6.56                 | 7.36                  | 0.80                     | 9.35  | 2.13E-18 | 2.07E-15 | up CINSARC High vs. Low |
| KPNA2    | karyopherin subunit alpha :    | 17q24.2  | 3838           | 11.20                | 11.96                 | 0.76                     | 9.08  | 1.53E-17 | 1.36E-14 | up CINSARC High vs. Low |
| TTK      | TTK protein kinase             | 6q14.1   | 7272           | 7.50                 | 8.34                  | 0.83                     | 9.03  | 2.23E-17 | 1.77E-14 | up CINSARC High vs. Low |
| NCAPG    | non-SMC condensin I com        | 4p15.31  | 64151          | 8.52                 | 9.25                  | 0.73                     | 9.02  | 2.31E-17 | 1.77E-14 | up CINSARC High vs. Low |
| KIF23    | kinesin family member 23       | 15q23    | 9493           | 8.77                 | 9.42                  | 0.65                     | 8.99  | 3.00E-17 | 2.03E-14 | up CINSARC High vs. Low |
| CKAP2L   | cytoskeleton associated pr     | 2q14.1   | 150468         | 7.10                 | 7.93                  | 0.83                     | 8.98  | 3.04E-17 | 2.03E-14 | up CINSARC High vs. Low |
| CENPE    | centromere protein E           | 4q24     | 1062           | 8.29                 | 9.10                  | 0.81                     | 8.98  | 3.22E-17 | 2.03E-14 | up CINSARC High vs. Low |
| TROAP    | trophinin associated protei    | 12q13.12 | 10024          | 7.52                 | 8.41                  | 0.89                     | 8.88  | 6.23E-17 | 3.70E-14 | up CINSARC High vs. Low |
| BUB1B    | BUB1 mitotic checkpoint st     | 15q15.1  | 701            | 8.39                 | 9.09                  | 0.70                     | 8.78  | 1.28E-16 | 7.23E-14 | up CINSARC High vs. Low |
| AURKA    | aurora kinase A                | 20q13.2  | 6790           | 8.54                 | 9.33                  | 0.79                     | 8.69  | 2.38E-16 | 1.21E-13 | up CINSARC High vs. Low |
| KIF2C    | kinesin family member 2C       | 1p34.1   | 11004          | 8.46                 | 9.21                  | 0.74                     | 8.69  | 2.38E-16 | 1.21E-13 | up CINSARC High vs. Low |
| PRC1     | protein regulator of cytokin   | 15q26.1  | 9055           | 9.95                 | 10.61                 | 0.66                     | 8.58  | 5.38E-16 | 2.62E-13 | up CINSARC High vs. Low |
| PARPBP   | PARP1 binding protein          | 12q23.2  | 55010          | 6.93                 | 7.62                  | 0.69                     | 8.55  | 6.71E-16 | 3.12E-13 | up CINSARC High vs. Low |
| SGO1     | shugoshin 1                    | 3p24.3   | 151648         | 6.11                 | 6.92                  | 0.81                     | 8.50  | 9.42E-16 | 4.20E-13 | up CINSARC High vs. Low |
| TICRR    | TOPBP1 interacting checki      | 15q26.1  | 90381          | 6.74                 | 7.61                  | 0.87                     | 8.49  | 9.94E-16 | 4.26E-13 | up CINSARC High vs. Low |
| NUF2     | NUF2 component of NDC80        | 1q23.3   | 83540          | 7.89                 | 8.64                  | 0.75                     | 8.37  | 2.28E-15 | 9.38E-13 | up CINSARC High vs. Low |
| DLGAP5   | DLG associated protein 5       | 14q22.3  | 9787           | 7.89                 | 8.68                  | 0.79                     | 8.36  | 2.49E-15 | 9.85E-13 | up CINSARC High vs. Low |
| ARHGAP1A | Rho GTPase activating prc      | 15q13.3  | 9824           | 8.49                 | 9.20                  | 0.71                     | 8.34  | 2.74E-15 | 1.05E-12 | up CINSARC High vs. Low |
| SPAG5    | sperm associated antigen 5     | 17q11.2  | 10615          | 9.31                 | 10.03                 | 0.72                     | 8.32  | 3.14E-15 | 1.12E-12 | up CINSARC High vs. Low |
| CENPF    | centromere protein F           | 1q41     | 1063           | 10.73                | 11.49                 | 0.75                     | 8.32  | 3.15E-15 | 1.12E-12 | up CINSARC High vs. Low |
| BLM      | BLM RecQ like helicase         | 15q26.1  | 641            | 7.11                 | 7.85                  | 0.74                     | 8.30  | 3.69E-15 | 1.24E-12 | up CINSARC High vs. Low |
| KIF20A   | kinesin family member 20A      | 5q31.2   | 10112          | 8.82                 | 9.48                  | 0.66                     | 8.30  | 3.71E-15 | 1.24E-12 | up CINSARC High vs. Low |
| MCM10    | minichromosome maintena        | 10p13    | 55388          | 7.27                 | 8.11                  | 0.84                     | 8.28  | 4.26E-15 | 1.38E-12 | up CINSARC High vs. Low |
| MAD2L1   | mitotic arrest deficient 2 lik | 4q27     | 4085           | 8.44                 | 9.13                  | 0.69                     | 8.27  | 4.46E-15 | 1.39E-12 | up CINSARC High vs. Low |
| KIF4A    | kinesin family member 4A       | Xq13.1   | 24137          | 8.81                 | 9.46                  | 0.65                     | 8.27  | 4.54E-15 | 1.39E-12 | up CINSARC High vs. Low |
| TRIP13   | thyroid hormone receptor in    | 5p15.33  | 9319           | 8.09                 | 8.85                  | 0.76                     | 8.22  | 6.22E-15 | 1.85E-12 | up CINSARC High vs. Low |
| CDC43    | cell division cycle associati  | 12p13.31 | 83461          | 7.37                 | 8.14                  | 0.77                     | 8.18  | 8.17E-15 | 2.36E-12 | up CINSARC High vs. Low |
| MTRFR2   | mitochondrial fission regul    | 6q23.3   | 113115         | 5.61                 | 6.40                  | 0.78                     | 8.16  | 9.79E-15 | 2.72E-12 | up CINSARC High vs. Low |
| SKA1     | spindle and kinetochore as     | 18q21.1  | 220134         | 6.85                 | 7.62                  | 0.77                     | 8.15  | 1.01E-14 | 2.72E-12 | up CINSARC High vs. Low |
| GTSE1    | G2 and S-phase expressee       | 22q13.31 | 51512          | 7.37                 | 8.05                  | 0.68                     | 8.15  | 1.02E-14 | 2.72E-12 | up CINSARC High vs. Low |
| NDC80    | NDC80 kinetochore compl        | 18p11.32 | 10403          | 7.75                 | 8.43                  | 0.68                     | 8.13  | 1.14E-14 | 2.98E-12 | up CINSARC High vs. Low |
| UBE2C    | ubiquitin conjugating enzyr    | 20q13.12 | 11065          | 8.89                 | 9.72                  | 0.84                     | 8.08  | 1.59E-14 | 4.05E-12 | up CINSARC High vs. Low |
| SKA3     | spindle and kinetochore as     | 13q12.11 | 221150         | 7.13                 | 7.85                  | 0.72                     | 8.07  | 1.72E-14 | 4.27E-12 | up CINSARC High vs. Low |
| ASPM     | abnormal spindle microtubi     | 1q31.3   | 259266         | 8.81                 | 9.61                  | 0.80                     | 8.06  | 1.90E-14 | 4.62E-12 | up CINSARC High vs. Low |
| RRM2     | ribonucleotide reductase re    | 2p25.1   | 6241           | 9.58                 | 10.35                 | 0.77                     | 8.04  | 2.14E-14 | 5.08E-12 | up CINSARC High vs. Low |
| TPX2     | TPX2 microtubule nucleati      | 20q11.21 | 22974          | 10.26                | 10.87                 | 0.61                     | 8.00  | 2.79E-14 | 6.36E-12 | up CINSARC High vs. Low |
| CDC48    | cell division cycle associati  | 1p34.3   | 55143          | 8.30                 | 8.92                  | 0.62                     | 7.99  | 3.02E-14 | 6.73E-12 | up CINSARC High vs. Low |
| CDK1     | cyclin dependent kinase 1      | 10q21.2  | 983            | 9.53                 | 10.22                 | 0.69                     | 7.96  | 3.76E-14 | 8.03E-12 | up CINSARC High vs. Low |
| ECT2     | epithelial cell transforming   | 3q26.31  | 1894           | 9.89                 | 10.53                 | 0.64                     | 7.84  | 8.24E-14 | 1.69E-11 | up CINSARC High vs. Low |
| KIF11    | kinesin family member 11       | 10q23.33 | 3832           | 9.40                 | 10.02                 | 0.62                     | 7.74  | 1.52E-13 | 3.02E-11 | up CINSARC High vs. Low |
| POLQ     | DNA polymerase theta           | 3q13.33  | 10721          | 6.91                 | 7.63                  | 0.72                     | 7.74  | 1.52E-13 | 3.02E-11 | up CINSARC High vs. Low |
| FAM72B   | family with sequence simila    | 1p11.2   | 653820         | 6.47                 | 7.30                  | 0.83                     | 7.68  | 2.25E-13 | 4.37E-11 | up CINSARC High vs. Low |
| NEK2     | NIMA related kinase 2          | 1q32.3   | 4751           | 8.78                 | 9.46                  | 0.68                     | 7.63  | 3.28E-13 | 6.26E-11 | up CINSARC High vs. Low |
| KIF18B   | kinesin family member 18B      | 17q21.31 | 146909         | 7.37                 | 8.14                  | 0.77                     | 7.62  | 3.41E-13 | 6.41E-11 | up CINSARC High vs. Low |
| DIAPH3   | diaphanous related formin      | 13q21.2  | 81624          | 7.04                 | 7.77                  | 0.72                     | 7.62  | 3.50E-13 | 6.46E-11 | up CINSARC High vs. Low |
| RADS51A1 | RADS51 associated protein      | 12p13.32 | 10635          | 7.48                 | 8.10                  | 0.62                     | 7.55  | 5.43E-13 | 9.84E-11 | up CINSARC High vs. Low |
| CDKN3    | cyclin dependent kinase ini    | 14q22.2  | 1033           | 7.14                 | 7.79                  | 0.66                     | 7.52  | 6.54E-13 | 1.15E-10 | up CINSARC High vs. Low |
| PLK1     | polo like kinase 1             | 16p12.2  | 5347           | 8.74                 | 9.40                  | 0.66                     | 7.52  | 6.56E-13 | 1.15E-10 | up CINSARC High vs. Low |
| DSCC1    | DNA replication and sister     | 8q24.12  | 79075          | 7.22                 | 7.97                  | 0.74                     | 7.51  | 6.78E-13 | 1.17E-10 | up CINSARC High vs. Low |
| AURKB    | aurora kinase B                | 17p13.1  | 9212           | 7.05                 | 7.84                  | 0.78                     | 7.44  | 1.06E-12 | 1.78E-10 | up CINSARC High vs. Low |
| TOP2A    | DNA topoisomerase II alph      | 17q21.2  | 7153           | 11.32                | 12.12                 | 0.80                     | 7.44  | 1.09E-12 | 1.80E-10 | up CINSARC High vs. Low |
| MELK     | maternal embryonic leucin      | 9p13.2   | 9833           | 8.03                 | 8.71                  | 0.68                     | 7.41  | 1.30E-12 | 2.10E-10 | up CINSARC High vs. Low |
| PTTG1    | PTTG1 regulator of sister c    | 5q33.3   | 9232           | 8.30                 | 8.98                  | 0.68                     | 7.40  | 1.37E-12 | 2.19E-10 | up CINSARC High vs. Low |
| MK167    | marker of proliferation Ki-6   | 10q26.2  | 4288           | 10.61                | 11.30                 | 0.69                     | 7.38  | 1.56E-12 | 2.46E-10 | up CINSARC High vs. Low |
| ESPL1    | extra spindle pole bodies li   | 12q13.13 | 9700           | 8.30                 | 8.98                  | 0.68                     | 7.37  | 1.65E-12 | 2.56E-10 | up CINSARC High vs. Low |
| ANLN     | anillin actin binding protein  | 7p14.2   | 54443          | 9.17                 | 9.84                  | 0.67                     | 7.34  | 2.10E-12 | 3.16E-10 | up CINSARC High vs. Low |
| SHCBP1   | SHC binding and spindle a      | 16q11.2  | 79801          | 7.45                 | 8.12                  | 0.69                     | 7.29  | 2.86E-12 | 4.25E-10 | up CINSARC High vs. Low |
| FAM72A   | family with sequence simila    | 1q32.1   | 729533         | 4.65                 | 5.51                  | 0.86                     | 7.25  | 3.59E-12 | 5.12E-10 | up CINSARC High vs. Low |
| PIMREG   | PICALM interacting mitotic     | 17p13.2  | 54478          | 6.39                 | 7.06                  | 0.67                     | 7.19  | 5.15E-12 | 7.25E-10 | up CINSARC High vs. Low |
| FAM83D   | family with sequence simila    | 20q11.23 | 81610          | 7.92                 | 8.69                  | 0.77                     | 7.05  | 1.22E-11 | 1.67E-09 | up CINSARC High vs. Low |
| CIF2A    | cell proliferation regulatin   | 3q13.13  | 57650          | 7.28                 | 8.00                  | 0.72                     | 7.03  | 1.43E-11 | 1.94E-09 | up CINSARC High vs. Low |
| INAVA    | innate immunity activator      | 1q32.1   | 55765          | 5.13                 | 7.06                  | 1.93                     | 7.00  | 1.71E-11 | 2.29E-09 | up CINSARC High vs. Low |
| IQGAP3   | IQ motif containing GTPas      | 1q22     | 128239         | 9.13                 | 9.75                  | 0.62                     | 7.00  | 1.75E-11 | 2.31E-09 | up CINSARC High vs. Low |
| UBE2T    | ubiquitin conjugating enzyr    | 1q32.1   | 29089          | 8.56                 | 9.18                  | 0.62                     | 6.97  | 2.08E-11 | 2.71E-09 | up CINSARC High vs. Low |
| CDC20    | cell division cycle 20         | 1p34.2   | 991            | 8.68                 | 9.36                  | 0.69                     | 6.94  | 2.49E-11 | 3.21E-09 | up CINSARC High vs. Low |
| FAM72D   | family with sequence simila    | 1q21.1   | 728833         | 5.55                 | 6.35                  | 0.79                     | 6.86  | 3.90E-11 | 4.91E-09 | up CINSARC High vs. Low |
| HASPIN   | histone H3 associated prot     | 17p13.2  | 83903          | 5.45                 | 6.09                  | 0.64                     | 6.81  | 5.42E-11 | 6.52E-09 | up CINSARC High vs. Low |
| NEIL3    | nei like DNA glycosylase 3     | 4q34.3   | 55247          | 5.77                 | 6.42                  | 0.65                     | 6.78  | 6.62E-11 | 7.87E-09 | up CINSARC High vs. Low |
| RTKN2    | roctekin 2                     | 10q21.2  | 219790         | 6.95                 | 7.66                  | 0.70                     | 6.76  | 7.18E-11 | 8.44E-09 | up CINSARC High vs. Low |
| KIF18A   | kinesin family member 18A      | 11p14.1  | 81930          | 7.07                 | 7.70                  | 0.63                     | 6.73  | 8.86E-11 | 1.01E-08 | up CINSARC High vs. Low |
| DEPDC1   | DEP domain containing 1        | 1p31.3   | 55635          | 7.48                 | 8.17                  | 0.69                     | 6.73  | 8.95E-11 | 1.01E-08 | up CINSARC High vs. Low |
| PIF1     | PIF1 5'-to-3' DNA helicase     | 15q22.31 | 80119          | 4.56                 | 5.39                  | 0.84                     | 6.60  | 1.85E-10 | 2.06E-08 | up CINSARC High vs. Low |
| PRR11    | proline rich 11                | 17q22    | 55771          | 6.05                 | 7.04                  | 0.99                     | 6.50  | 3.46E-10 | 3.74E-08 | up CINSARC High vs. Low |
| MYBL2    | MYB proto-oncogene like 2      | 20q13.12 | 4605           | 9.16                 | 10.07                 | 0.91                     | 6.44  | 4.83E-10 | 5.16E-08 | up CINSARC High vs. Low |
| E2F8     | E2F transcription factor 8     | 11p15.1  | 79733          | 6.47                 | 7.29                  | 0.81                     | 6.35  | 8.17E-10 | 8.40E-08 | up CINSARC High vs. Low |
| SQLE     | squalene epoxidase             | 8q24.13  | 6713           | 10.52                | 11.29                 | 0.78                     | 6.32  | 9.77E-10 | 9.95E-08 | up CINSARC High vs. Low |
| EXO1     | exonuclease 1                  | 1q43     | 9156           | 7.57                 | 8.18                  | 0.62                     | 6.27  | 1.29E-09 | 1.29E-07 | up CINSARC High vs. Low |
| ORC1     | origin recognition complex     | 1p32.3   | 4998           | 6.35                 | 6.96                  | 0.61                     | 6.19  | 1.95E-09 | 1.88E-07 | up CINSARC High vs. Low |
| CCNE2    | cyclin E2                      | 8q22.1   | 9134           | 7.90                 | 8.58                  | 0.68                     | 6.17  | 2.24E-09 | 2.06E-07 | up CINSARC High vs. Low |
| LAD1     | ladinin 1                      | 1q32.1   | 3898           | 7.98                 | 9.25                  | 1.27                     | 6.15  | 2.53E-09 | 2.29E-07 | up CINSARC High vs. Low |
| CENPI    | centromere protein I           | Xq22.1   | 2491           | 5.75                 | 6.45                  | 0.69                     | 6.09  | 3.43E-09 | 2.98E-07 | up CINSARC High vs. Low |
| ORC6     | origin recognition complex     | 16q11.2  | 23594          | 6.62                 | 7.26                  | 0.64                     | 5.85  | 1.33E-08 | 9.91E-07 | up CINSARC High vs. Low |
| RAD54B   | RAD54 homolog B                | 8q22.1   | 25788          | 7.33                 | 7.93                  | 0.60                     | 5.81  | 1.64E-08 | 1.19E-06 | up CINSARC High vs. Low |
| DNMT3B   | DNA methyltransferase 3 b      | 20q11.21 | 1789           | 6.54                 | 7.18                  | 0.64                     | 5.76  | 2.07E-08 | 1.46E-06 | up CINSARC High vs. Low |
| CCNE1    | cyclin E1                      | 19q12    | 898            | 5.70                 | 6.38                  | 0.67                     | 5.63  | 4.20E-08 | 2.74E-06 | up CINSARC High vs. Low |
| MEX3A    | mex-3 RNA binding family       | 1q22     | 92312          | 8.59                 | 9.41                  | 0.82                     | 5.63  | 4.25E-08 | 2.76E-06 | up CINSARC High vs. Low |
| CDC6     | cell division cycle 6          | 17q21.2  | 990            | 8.65                 | 9.25                  | 0.60                     | 5.53  | 6.87E-08 | 4.22E-06 | up CINSARC High vs. Low |
| CTNND2   | catenin delta 2                | 5p15.2   | 1501           | 6.84                 | 8.28                  | 1.44                     | 5.39  | 1.44E-07 | 7.93E-06 | up CINSARC High vs. Low |
| MMD      | monocyte to macrophage c       | 17q22    | 23531          | 7.90                 | 8.55                  | 0.65                     | 5.38  | 1.48E-07 | 8.11E-06 | up CINSARC High vs. Low |
| KLF5     | Kruppel like factor 5          | 13q22.1  | 688            | 6.93                 | 7.85                  | 0.92                     | 5.18  | 4.14E-07 | 1.98E-05 | up CINSARC High vs. Low |
| C18orf54 | chromosome 18 open read        | 18q21.2  | 162681         | 6.52                 | 7.15                  | 0.63                     | 5.07  | 6.94E-07 | 3.16E-05 | up CINSARC High vs. Low |
| NMU      | neuromedin U                   | 4q12     | 1087           |                      |                       |                          |       |          |          |                         |

| Symbol    | description                      | Cytoband       | Entrez Gene ID | Low-risk (mean_log2) | High-risk (mean_log2) | High vs. Low (log2-ratio) | t    | p-value  | q-value  | Associated to           |
|-----------|----------------------------------|----------------|----------------|----------------------|-----------------------|---------------------------|------|----------|----------|-------------------------|
| GPX2      | glutathione peroxidase 2         | 14q23.3        | 2877           | 2.79                 | 4.18                  | 1.39                      | 4.93 | 1.37E-06 | 5.59E-05 | up CINSARC High vs. Low |
| SIN3HCAF  | SIN3-HDAC complex asso           | 12p11.21       | 58516          | 9.35                 | 10.02                 | 0.68                      | 4.91 | 1.48E-06 | 5.85E-05 | up CINSARC High vs. Low |
| CCDC150   | coiled-coil domain containi      | 2q33.1         | 284992         | 4.00                 | 4.66                  | 0.65                      | 4.91 | 1.48E-06 | 5.85E-05 | up CINSARC High vs. Low |
| GAS2L3    | growth arrest specific 2 like    | 12q23.1        | 283431         | 5.42                 | 6.09                  | 0.67                      | 4.83 | 2.17E-06 | 8.19E-05 | up CINSARC High vs. Low |
| MSMB      | microseminoprotein beta          | 10q11.22       | 4477           | 4.28                 | 6.27                  | 1.99                      | 4.76 | 3.03E-06 | 1.10E-04 | up CINSARC High vs. Low |
| GFR3      | GDNF family receptor alpha       | 5q31.2         | 2676           | 1.09                 | 1.71                  | 0.61                      | 4.70 | 4.05E-06 | 1.38E-04 | up CINSARC High vs. Low |
| PKP1      | plakophilin 1                    | 1q32.1         | 5317           | 4.88                 | 6.27                  | 1.39                      | 4.64 | 5.21E-06 | 1.67E-04 | up CINSARC High vs. Low |
| KNL1      | kinetochore scaffold 1           | 15q15.1        | 57082          | 7.29                 | 7.94                  | 0.65                      | 4.62 | 5.81E-06 | 1.83E-04 | up CINSARC High vs. Low |
| RPRM      | reprimin, TP53 dependent f       | 2q23.3         | 56475          | 0.88                 | 1.61                  | 0.73                      | 4.59 | 6.42E-06 | 1.97E-04 | up CINSARC High vs. Low |
| TAF4B     | TATA-box binding protein f       | 18q11.2        | 6875           | 6.18                 | 6.83                  | 0.66                      | 4.57 | 7.04E-06 | 2.12E-04 | up CINSARC High vs. Low |
| AIF1L     | allograft inflammatory fact      | 9q34.12-q34.13 | 83543          | 8.49                 | 9.33                  | 0.84                      | 4.57 | 7.16E-06 | 2.15E-04 | up CINSARC High vs. Low |
| GGH       | gamma-glutamyl hydrolase         | 8q12.3         | 8836           | 8.17                 | 8.96                  | 0.79                      | 4.51 | 9.45E-06 | 2.70E-04 | up CINSARC High vs. Low |
| LRP8      | LDL receptor related protei      | 1p32.3         | 7804           | 6.57                 | 7.17                  | 0.60                      | 4.48 | 1.05E-05 | 2.92E-04 | up CINSARC High vs. Low |
| ZC2HC1A   | zinc finger C2HC-type conti      | 8q21.13        | 51101          | 7.22                 | 7.95                  | 0.74                      | 4.48 | 1.08E-05 | 2.98E-04 | up CINSARC High vs. Low |
| MND1      | meiotic nuclear divisions 1      | 4q31.3         | 84057          | 5.55                 | 6.16                  | 0.61                      | 4.47 | 1.09E-05 | 2.99E-04 | up CINSARC High vs. Low |
| UGT8      | UDP glycosyltransferase 8        | 4q26           | 7368           | 2.13                 | 3.04                  | 0.92                      | 4.45 | 1.23E-05 | 3.27E-04 | up CINSARC High vs. Low |
| MYBL1     | MYB proto-oncogene like 1        | 8q13.1         | 4603           | 7.85                 | 8.54                  | 0.69                      | 4.42 | 1.39E-05 | 3.56E-04 | up CINSARC High vs. Low |
| TNNI1     | tropomyosin I1, slow skeletal ty | 1q32.1         | 7135           | 3.33                 | 4.29                  | 0.96                      | 4.42 | 1.40E-05 | 3.58E-04 | up CINSARC High vs. Low |
| CBX2      | chromobox 2                      | 17q25.3        | 84733          | 7.13                 | 8.02                  | 0.89                      | 4.41 | 1.42E-05 | 3.61E-04 | up CINSARC High vs. Low |
| CAMP      | cathelicidin antimicrobial pe    | 3p21.31        | 820            | 2.71                 | 3.79                  | 1.08                      | 4.38 | 1.68E-05 | 4.11E-04 | up CINSARC High vs. Low |
| FAM3B     | family with sequence simila      | 21q22.3        | 54097          | 4.54                 | 6.19                  | 1.65                      | 4.36 | 1.82E-05 | 4.36E-04 | up CINSARC High vs. Low |
| BRIP1     | BRCA1 interacting protein        | 17q23.2        | 83990          | 6.94                 | 7.54                  | 0.59                      | 4.35 | 1.85E-05 | 4.40E-04 | up CINSARC High vs. Low |
| FIB       | nuclear factor 1B                | 9p23-p22.3     | 4781           | 9.05                 | 9.71                  | 0.66                      | 4.34 | 1.93E-05 | 4.53E-04 | up CINSARC High vs. Low |
| PFN2      | profilin 2                       | 3q25.1         | 5217           | 10.33                | 10.93                 | 0.60                      | 4.33 | 2.03E-05 | 4.68E-04 | up CINSARC High vs. Low |
| CNIH2     | cornichon family AMPA rec        | 11q13.2        | 254263         | 5.59                 | 6.23                  | 0.64                      | 4.32 | 2.15E-05 | 4.89E-04 | up CINSARC High vs. Low |
| CTSV      | cathepsin V                      | 9q22.33        | 1515           | 5.69                 | 6.32                  | 0.63                      | 4.31 | 2.25E-05 | 5.04E-04 | up CINSARC High vs. Low |
| ZNF711    | zinc finger protein 711          | Xq21.1         | 7552           | 5.46                 | 6.35                  | 0.89                      | 4.30 | 2.31E-05 | 5.16E-04 | up CINSARC High vs. Low |
| GABBR2    | gamma-aminobutyric acid 1        | 9q22.33        | 9568           | 0.42                 | 1.12                  | 0.70                      | 4.29 | 2.45E-05 | 5.43E-04 | up CINSARC High vs. Low |
| SDK2      | sidekick cell adhesion mole      | 17q25.1        | 54549          | 5.03                 | 6.30                  | 1.26                      | 4.24 | 3.04E-05 | 6.46E-04 | up CINSARC High vs. Low |
| RNF43     | ring finger protein 43           | 17q22          | 54894          | 8.55                 | 9.42                  | 0.87                      | 4.22 | 3.25E-05 | 6.80E-04 | up CINSARC High vs. Low |
| WVE       | von Willebrand factor D an       | 7p21.3         | 221806         | 2.34                 | 3.51                  | 1.17                      | 4.22 | 3.28E-05 | 6.82E-04 | up CINSARC High vs. Low |
| CHRNA5    | cholinergic receptor nicotin     | 15q25.1        | 1138           | 4.64                 | 5.47                  | 0.83                      | 4.21 | 3.32E-05 | 6.89E-04 | up CINSARC High vs. Low |
| PRAME     | preferentially expressed ar      | 22q11.22       | 23532          | 3.19                 | 5.33                  | 2.14                      | 4.20 | 3.54E-05 | 7.24E-04 | up CINSARC High vs. Low |
| LAPT4B    | lysosomal protein transme        | 8q22.1         | 55353          | 11.46                | 12.14                 | 0.68                      | 4.19 | 3.71E-05 | 7.53E-04 | up CINSARC High vs. Low |
| FAM171A2  | family with sequence simila      | 17q21.31       | 284069         | 4.86                 | 5.54                  | 0.67                      | 4.18 | 3.83E-05 | 7.73E-04 | up CINSARC High vs. Low |
| ACPP      | acid phosphatase, prostate       | 3q22.1         | 55             | 4.19                 | 4.88                  | 0.69                      | 4.17 | 4.03E-05 | 8.01E-04 | up CINSARC High vs. Low |
| MYCN      | MYCN proto-oncogene, b           | 2p24.3         | 4613           | 3.38                 | 4.19                  | 0.81                      | 4.14 | 4.57E-05 | 8.84E-04 | up CINSARC High vs. Low |
| CHST9     | carbohydrate sulfotransfer       | 18q11.2        | 83539          | 2.52                 | 3.44                  | 0.92                      | 4.13 | 4.76E-05 | 9.10E-04 | up CINSARC High vs. Low |
| DSC2      | desmocollin 2                    | 18q12.1        | 1824           | 8.68                 | 9.41                  | 0.73                      | 4.10 | 5.23E-05 | 9.84E-04 | up CINSARC High vs. Low |
| LOC148709 | actin gamma 1 pseudogen          | 1q32.1         | 148709         | 3.38                 | 4.03                  | 0.65                      | 4.10 | 5.43E-05 | 1.02E-03 | up CINSARC High vs. Low |
| SLC7A5    | solute carrier family 7 mem      | 16q24.2        | 8140           | 9.87                 | 10.52                 | 0.65                      | 4.05 | 6.64E-05 | 1.19E-03 | up CINSARC High vs. Low |
| PKHD1L1   | PKHD1 like 1                     | 8q23.1-q23.2   | 93035          | 1.30                 | 1.97                  | 0.67                      | 4.04 | 6.70E-05 | 1.20E-03 | up CINSARC High vs. Low |
| IKZF2     | IKAROS family zinc finger :      | 2q34           | 22807          | 7.06                 | 7.84                  | 0.79                      | 4.03 | 7.11E-05 | 1.26E-03 | up CINSARC High vs. Low |
| ADTRP     | androgen dependent TFPI          | 6p24.1         | 84830          | 2.87                 | 3.48                  | 0.61                      | 4.00 | 7.95E-05 | 1.36E-03 | up CINSARC High vs. Low |
| CB2       | calcium and integrin bindin      | 15q25.1        | 10518          | 4.98                 | 5.58                  | 0.60                      | 3.95 | 9.92E-05 | 1.61E-03 | up CINSARC High vs. Low |
| FAM83A    | family with sequence simila      | 8q24.13        | 84985          | 3.64                 | 4.85                  | 1.22                      | 3.93 | 1.06E-04 | 1.69E-03 | up CINSARC High vs. Low |
| STXBP5L   | syntaxin binding protein 5 l     | 3q13.33        | 9515           | 1.00                 | 1.84                  | 0.84                      | 3.89 | 1.22E-04 | 1.88E-03 | up CINSARC High vs. Low |
| FS1       | fibronectin type III and SP      | 19p13.3        | 79187          | 1.13                 | 1.81                  | 0.68                      | 3.88 | 1.30E-04 | 1.98E-03 | up CINSARC High vs. Low |
| CNGA2     | cyclic nucleotide gated cha      | Xq28           | 1260           | 0.48                 | 1.28                  | 0.80                      | 3.87 | 1.36E-04 | 2.04E-03 | up CINSARC High vs. Low |
| PARM1     | prostate androgen-regulate       | 4q13.3         | 25849          | 8.29                 | 8.94                  | 0.65                      | 3.86 | 1.40E-04 | 2.08E-03 | up CINSARC High vs. Low |
| STYK1     | serine/threonine/tyrosine ki     | 12p13.2        | 55359          | 5.24                 | 6.09                  | 0.85                      | 3.85 | 1.47E-04 | 2.17E-03 | up CINSARC High vs. Low |
| SCN8A     | sodium voltage-gated char        | 12q13.13       | 6334           | 4.10                 | 4.92                  | 0.82                      | 3.84 | 1.49E-04 | 2.18E-03 | up CINSARC High vs. Low |
| TEX19     | testis expressed 19              | 17q25.3        | 400629         | 2.22                 | 3.10                  | 0.88                      | 3.84 | 1.50E-04 | 2.19E-03 | up CINSARC High vs. Low |
| GPC2      | glypican 2                       | 7q22.1         | 221914         | 3.62                 | 4.28                  | 0.66                      | 3.80 | 1.78E-04 | 2.53E-03 | up CINSARC High vs. Low |
| EDARADD   | EDAR associated death dc         | 1q42.3-q43     | 128178         | 7.59                 | 8.47                  | 0.87                      | 3.78 | 1.91E-04 | 2.67E-03 | up CINSARC High vs. Low |
| AREG      | amphiregulin                     | 4q13.3         | 374            | 6.34                 | 7.58                  | 1.24                      | 3.77 | 1.99E-04 | 2.75E-03 | up CINSARC High vs. Low |
| SCML2     | Scm polycomb group prote         | Xp22.13        | 10389          | 5.22                 | 5.92                  | 0.70                      | 3.76 | 2.05E-04 | 2.79E-03 | up CINSARC High vs. Low |
| MAGEA4    | MAGE family member A4            | Xq28           | 4103           | 0.15                 | 0.74                  | 0.59                      | 3.72 | 2.38E-04 | 3.12E-03 | up CINSARC High vs. Low |
| ONECUT2   | one cut homeobox 2               | 18q21.31       | 9480           | 3.06                 | 4.35                  | 1.29                      | 3.71 | 2.44E-04 | 3.15E-03 | up CINSARC High vs. Low |
| CYP2J2    | cytochrome P450 family 2 :       | 1p32.1         | 1573           | 6.66                 | 7.39                  | 0.73                      | 3.69 | 2.62E-04 | 3.33E-03 | up CINSARC High vs. Low |
| SLC4A8    | solute carrier family 4 mem      | 12q13.13       | 9498           | 8.33                 | 9.06                  | 0.74                      | 3.69 | 2.64E-04 | 3.34E-03 | up CINSARC High vs. Low |
| KLHL13    | kelch like family member 1 :     | Xq24           | 90293          | 5.18                 | 5.86                  | 0.68                      | 3.69 | 2.68E-04 | 3.39E-03 | up CINSARC High vs. Low |
| RAB39B    | RAB39B, member RAS on            | Xq28           | 116442         | 4.92                 | 5.87                  | 0.95                      | 3.67 | 2.87E-04 | 3.53E-03 | up CINSARC High vs. Low |
| SLC15A2   | solute carrier family 15 mei     | 3q13.33        | 6565           | 4.63                 | 5.33                  | 0.70                      | 3.60 | 3.69E-04 | 4.20E-03 | up CINSARC High vs. Low |
| HNF4G     | hepatocyte nuclear factor 4      | 8q21.13        | 3174           | 4.20                 | 5.07                  | 0.87                      | 3.60 | 3.71E-04 | 4.21E-03 | up CINSARC High vs. Low |
| GAREM1    | GRB2 associated regulato         | 18q12.1        | 64762          | 5.83                 | 6.47                  | 0.65                      | 3.59 | 3.89E-04 | 4.34E-03 | up CINSARC High vs. Low |
| DMRTA1    | DMRT like family A1              | 9p21.3         | 63951          | 1.60                 | 2.36                  | 0.76                      | 3.59 | 3.91E-04 | 4.35E-03 | up CINSARC High vs. Low |
| MMP1      | matrix metalloproteinase 1       | 11q22.2        | 4312           | 5.86                 | 7.00                  | 1.14                      | 3.57 | 4.10E-04 | 4.50E-03 | up CINSARC High vs. Low |
| DLL3      | delta like canonical Notch I     | 19q13.2        | 10683          | 1.27                 | 2.13                  | 0.87                      | 3.57 | 4.19E-04 | 4.56E-03 | up CINSARC High vs. Low |
| TNNI2     | tropomyosin T2, cardiac ty       | 1q32.1         | 7139           | 0.88                 | 1.52                  | 0.64                      | 3.56 | 4.25E-04 | 4.61E-03 | up CINSARC High vs. Low |
| FGF13     | fibroblast growth factor 13      | Xq26.3-q27.1   | 2258           | 6.49                 | 7.24                  | 0.76                      | 3.55 | 4.47E-04 | 4.76E-03 | up CINSARC High vs. Low |
| LRR1Q1    | leucine rich repeats and IQ      | 12q21.31       | 84125          | 3.02                 | 3.94                  | 0.93                      | 3.55 | 4.52E-04 | 4.79E-03 | up CINSARC High vs. Low |
| HSPA4L    | heat shock protein family A      | 4q28.1         | 22824          | 6.46                 | 7.13                  | 0.67                      | 3.55 | 4.53E-04 | 4.79E-03 | up CINSARC High vs. Low |
| MAGEA1    | MAGE family member A1            | Xq28           | 4100           | 1.22                 | 2.45                  | 1.23                      | 3.54 | 4.72E-04 | 4.95E-03 | up CINSARC High vs. Low |
| RHBG      | Rh family B glycoprotein (g      | 1q22           | 57127          | 3.17                 | 3.93                  | 0.75                      | 3.53 | 4.79E-04 | 4.99E-03 | up CINSARC High vs. Low |
| CARML3    | capping protein regulator a      | 14q11.2        | 90668          | 3.52                 | 4.24                  | 0.73                      | 3.53 | 4.79E-04 | 4.99E-03 | up CINSARC High vs. Low |
| TTPA      | alpha tocopherol transfer p      | 8q12.3         | 7274           | 1.51                 | 2.22                  | 0.71                      | 3.52 | 4.91E-04 | 5.08E-03 | up CINSARC High vs. Low |
| TSPAN8    | tetraspanin 8                    | 12q21.1        | 7103           | 1.46                 | 2.66                  | 1.19                      | 3.52 | 4.94E-04 | 5.09E-03 | up CINSARC High vs. Low |
| EPHA7     | EPH receptor A7                  | 6q16.1         | 2045           | 2.89                 | 3.71                  | 0.82                      | 3.52 | 5.01E-04 | 5.14E-03 | up CINSARC High vs. Low |
| SAMD11    | sterile alpha motif domain c     | 1p36.33        | 148398         | 4.87                 | 5.86                  | 0.99                      | 3.51 | 5.16E-04 | 5.28E-03 | up CINSARC High vs. Low |
| SEPT3     | septin 3                         | 22q13.2        | 55964          | 7.44                 | 8.09                  | 0.65                      | 3.49 | 5.61E-04 | 5.60E-03 | up CINSARC High vs. Low |
| SLITRK5   | SLIT and NTRK like family        | 13q31.2        | 26050          | 2.46                 | 3.38                  | 0.92                      | 3.49 | 5.63E-04 | 5.61E-03 | up CINSARC High vs. Low |
| CRYBG2    | crystallin beta-gamma dom        | 1p36.11        | 55057          | 3.29                 | 4.00                  | 0.71                      | 3.48 | 5.67E-04 | 5.62E-03 | up CINSARC High vs. Low |
| WASF3     | WASP family member 3             | 13q12.13       | 10810          | 6.18                 | 6.77                  | 0.59                      | 3.47 | 5.99E-04 | 5.85E-03 | up CINSARC High vs. Low |
| RFX6      | regulatory factor X6             | 6q22.1         | 222546         | 0.64                 | 1.31                  | 0.67                      | 3.46 | 6.09E-04 | 5.93E-03 | up CINSARC High vs. Low |
| SLCO4C1   | solute carrier organic anion     | 5q21.1         | 353189         | 2.70                 | 3.36                  | 0.66                      | 3.44 | 6.61E-04 | 6.31E-03 | up CINSARC High vs. Low |
| TMEM40    | transmembrane protein 40         | 3p25.2         | 55287          | 2.40                 | 3.36                  | 0.97                      | 3.43 | 6.82E-04 | 6.47E-03 | up CINSARC High vs. Low |
| CCL18     | C-C motif chemokine ligand       | 17q12          | 6362           | 4.26                 | 5.15                  | 0.89                      | 3.41 | 7.29E-04 | 6.81E-03 | up CINSARC High vs. Low |
| PIK3C2G   | phosphatidylinositol-4-phos      | 12p12.3        | 5288           | 2.24                 | 2.99                  | 0.76                      | 3.41 | 7.37E-04 | 6.86E-03 | up CINSARC High vs. Low |
| IL19      | interleukin 19                   | 1q32.1         | 29949          | 1.59                 | 2.57                  | 0.98                      | 3.40 | 7.59E-04 | 6.99E-03 | up CINSARC High vs. Low |
| ZYG11A    | zyg-11 family member A, c        | 1p32.3         | 440590         | 5.79                 | 6.46                  | 0.67                      | 3.40 | 7.77E-04 | 7.11E-03 | up CINSARC High vs. Low |
| DLX4      | distal-less homeobox 4           | 17q21.33       | 1748           | 3.60                 | 4.26                  | 0.66                      | 3.36 | 8.75E-04 | 7.78E-03 | up CINSARC High vs. Low |
| PSCA      | prostate stem cell antigen       | 8q24.3         | 8000           | 4.25                 | 5.47                  | 1.22                      | 3.35 | 9.10E-04 | 8.00E-03 | up CINSARC High vs. Low |
| TSPAN5    | tetraspanin 5                    | 4q23           | 10098          | 6.01                 | 6.88                  | 0.67                      | 3.30 | 1.08E-03 | 9.10E-03 | up CINSARC High vs. Low |
| TENM2     | teneurin transmembrane pi        | 5q34           | 57451          | 4.43                 | 5.18                  | 0.75                      | 3.29 | 1.12E-03 | 9.28E-03 | up CINSARC High vs. Low |
| ULBP1     | UL16 binding protein 1           | 6q25.1         | 80329          | 3.07                 | 3.75                  | 0.68                      | 3.29 | 1.12E-03 | 9.28E-03 | up CINSARC High vs. Low |
| HS6ST3    | heparan sulfate 6-O-sulfot       | 13q32.1        | 266722         | 6.10                 | 7.29                  | 1.18                      | 3.27 | 1.20E-03 | 9.72E-03 | up CINSARC High vs. Low |
| GABRA3    | gamma-aminobutyric acid 1        | Xq28           | 2556           | 0.50                 | 1.23                  | 0.72                      | 3.24 | 1.32E-03 | 1.04E-02 | up CINSARC High vs. Low |
| ADGRG6    | adhesion G protein-couple        | 6q24.2         | 57211          | 6.21                 | 7.01                  | 0.80                      | 3.24 | 1.34E-03 | 1.05E-02 | up CINSARC High vs. Low |
| EYA2      | EYA transcriptional coactiv      | 20q13.12       | 2139           | 6.99                 | 7.79                  | 0.80                      | 3.24 | 1.35E-03 | 1.06E-02 | up CINSARC High vs. Low |
| ALG1L     | ALG1 chitobiosylidiphosph        | 3q21.2         | 200810         | 3.72                 | 4.60                  | 0.88                      | 3.23 | 1.36E-03 | 1.06E-02 | up CINSARC High vs. Low |
| FIGN      | figetin, microtubule             |                |                |                      |                       |                           |      |          |          |                         |

| Symbol     | description                    | Cytoband     | Entrez<br>Gene ID | Low-risk<br>(mean_log2) | High-risk<br>(mean_log2) | High vs.Low<br>(log2-ratio) | t    | p-value  | q-value  | Associated to           |
|------------|--------------------------------|--------------|-------------------|-------------------------|--------------------------|-----------------------------|------|----------|----------|-------------------------|
| MUC13      | mucin 13, cell surface assoc   | 3q21.2       | 56667             | 0.95                    | 1.67                     | 0.72                        | 3.14 | 1.84E-03 | 1.32E-02 | up CINSARC High vs. Low |
| IYD        | iodotyrosine deiodinase        | 6q25.1       | 389434            | 3.41                    | 4.32                     | 0.92                        | 3.13 | 1.90E-03 | 1.34E-02 | up CINSARC High vs. Low |
| EFS        | embryonal Fyn-associated       | 14q11.2      | 10278             | 8.13                    | 8.79                     | 0.66                        | 3.13 | 1.95E-03 | 1.36E-02 | up CINSARC High vs. Low |
| GAGE12D    | G antigen 12D                  | Xp11.23      | 100132399         | 0.11                    | 0.84                     | 0.72                        | 3.13 | 1.95E-03 | 1.36E-02 | up CINSARC High vs. Low |
| MMP3       | matrix metalloproteinase 3     | 11q22.2      | 4314              | 5.65                    | 6.45                     | 0.80                        | 3.11 | 2.06E-03 | 1.42E-02 | up CINSARC High vs. Low |
| DLX3       | distal-less homeobox 3         | 17q21.33     | 1747              | 4.79                    | 5.60                     | 0.81                        | 3.11 | 2.07E-03 | 1.42E-02 | up CINSARC High vs. Low |
| EFNB3      | ephrin B3                      | 17p13.1      | 1949              | 5.54                    | 6.17                     | 0.63                        | 3.08 | 2.25E-03 | 1.50E-02 | up CINSARC High vs. Low |
| SFTPA2     | surfactant protein A2          | 10q22.3      | 729238            | 3.11                    | 3.92                     | 0.80                        | 3.06 | 2.41E-03 | 1.57E-02 | up CINSARC High vs. Low |
| MSI1       | musashi RNA binding protei     | 12q24.31     | 4440              | 4.92                    | 5.82                     | 0.90                        | 3.06 | 2.43E-03 | 1.58E-02 | up CINSARC High vs. Low |
| ARX        | aristaeless related homeobc    | Xp21.3       | 170302            | 1.87                    | 2.80                     | 0.93                        | 3.05 | 2.49E-03 | 1.60E-02 | up CINSARC High vs. Low |
| L1CAM      | L1 cell adhesion molecule      | Xq28         | 3897              | 3.85                    | 4.68                     | 0.84                        | 3.05 | 2.50E-03 | 1.61E-02 | up CINSARC High vs. Low |
| NAP1L2     | nucleosome assembly prot       | Xq13.2       | 4674              | 4.09                    | 4.76                     | 0.67                        | 3.04 | 2.56E-03 | 1.62E-02 | up CINSARC High vs. Low |
| PADI3      | peptidyl arginine deiminase    | 1p36.13      | 51702             | 1.78                    | 2.53                     | 0.75                        | 3.00 | 2.96E-03 | 1.79E-02 | up CINSARC High vs. Low |
| LHX1       | LIM homeobox 1                 | 17q12        | 3975              | 0.58                    | 1.21                     | 0.63                        | 2.98 | 3.11E-03 | 1.84E-02 | up CINSARC High vs. Low |
| TMSB15A    | thymosin beta 15a              | Xq22.1       | 11013             | 3.49                    | 4.09                     | 0.60                        | 2.97 | 3.27E-03 | 1.90E-02 | up CINSARC High vs. Low |
| SLC9A2     | solute carrier family 9 mem    | 2q12.1       | 6549              | 4.04                    | 5.20                     | 1.17                        | 2.95 | 3.43E-03 | 1.97E-02 | up CINSARC High vs. Low |
| ST6GALNAC1 | ST6 N-acetylgalactosami        | 17q25.1      | 55808             | 2.67                    | 3.33                     | 0.66                        | 2.94 | 3.55E-03 | 2.02E-02 | up CINSARC High vs. Low |
| SLAIN1     | SLAIN motif family membe       | 13q22.3      | 122060            | 3.75                    | 4.46                     | 0.71                        | 2.94 | 3.58E-03 | 2.03E-02 | up CINSARC High vs. Low |
| GPR158     | G protein-coupled receptor     | 10p12.1      | 57512             | 3.25                    | 4.05                     | 0.79                        | 2.94 | 3.58E-03 | 2.03E-02 | up CINSARC High vs. Low |
| ADCY5      | adenylate cyclase 5            | 3q21.1       | 111               | 5.22                    | 6.15                     | 0.93                        | 2.93 | 3.60E-03 | 2.03E-02 | up CINSARC High vs. Low |
| NXPH1      | neurexophilin 1                | 7p21.3       | 30010             | 1.94                    | 3.02                     | 1.08                        | 2.93 | 3.70E-03 | 2.08E-02 | up CINSARC High vs. Low |
| ATP1A3     | ATPase Na+/K+ transporti       | 19q13.2      | 478               | 4.42                    | 5.30                     | 0.88                        | 2.92 | 3.75E-03 | 2.10E-02 | up CINSARC High vs. Low |
| TMPRSS4    | transmembrane serine pro       | 11q23.3      | 56649             | 4.30                    | 5.34                     | 1.04                        | 2.90 | 3.97E-03 | 2.17E-02 | up CINSARC High vs. Low |
| SLC27A6    | solute carrier family 27 mei   | 5q23.3       | 28965             | 2.56                    | 3.24                     | 0.68                        | 2.89 | 4.14E-03 | 2.23E-02 | up CINSARC High vs. Low |
| S100A8     | S100 calcium binding prote     | 1q21.3       | 6279              | 4.64                    | 5.36                     | 0.72                        | 2.89 | 4.16E-03 | 2.24E-02 | up CINSARC High vs. Low |
| GAGE4      | G antigen 4                    | Xp11.4-p11.2 | 2576              | 0.15                    | 0.82                     | 0.66                        | 2.89 | 4.16E-03 | 2.24E-02 | up CINSARC High vs. Low |
| SLC6A15    | solute carrier family 6 mem    | 12q21.31     | 55117             | 0.80                    | 1.39                     | 0.59                        | 2.88 | 4.31E-03 | 2.28E-02 | up CINSARC High vs. Low |
| PLCH1      | phospholipase C eta 1          | 3q25.31      | 23007             | 5.00                    | 5.92                     | 0.92                        | 2.86 | 4.47E-03 | 2.34E-02 | up CINSARC High vs. Low |
| OGDHL      | oxoglutarate dehydrogenas      | 10q11.23     | 55753             | 1.51                    | 2.23                     | 0.71                        | 2.86 | 4.49E-03 | 2.34E-02 | up CINSARC High vs. Low |
| VSTM2L     | V-set and transmembrane        | 20q11.23     | 128434            | 3.88                    | 4.66                     | 0.78                        | 2.85 | 4.68E-03 | 2.41E-02 | up CINSARC High vs. Low |
| GALNT3     | polypeptide N-acetylgalact     | 2q24.3       | 2591              | 7.96                    | 8.69                     | 0.73                        | 2.85 | 4.69E-03 | 2.42E-02 | up CINSARC High vs. Low |
| SERPINC5   | serpin family B member 5       | 18q21.33     | 5268              | 4.28                    | 5.11                     | 0.82                        | 2.84 | 4.89E-03 | 2.48E-02 | up CINSARC High vs. Low |
| TTL7       | tubulin tyrosine ligase like   | 1p31.1       | 79739             | 5.34                    | 5.98                     | 0.64                        | 2.83 | 4.93E-03 | 2.49E-02 | up CINSARC High vs. Low |
| FAM178B    | family with sequence simila    | 2q11.2       | 51252             | 3.42                    | 4.15                     | 0.73                        | 2.82 | 5.10E-03 | 2.55E-02 | up CINSARC High vs. Low |
| ZBED9      | zinc finger BED-type conta     | 6p22.1       | 114821            | 3.29                    | 4.14                     | 0.86                        | 2.82 | 5.12E-03 | 2.55E-02 | up CINSARC High vs. Low |
| IL6        | interleukin 6                  | 7p15.3       | 3569              | 2.94                    | 3.53                     | 0.59                        | 2.82 | 5.16E-03 | 2.56E-02 | up CINSARC High vs. Low |
| PCDH11X    | protocadherin 11 X-linked      | Xq21.31      | 27328             | 0.90                    | 1.49                     | 0.59                        | 2.82 | 5.18E-03 | 2.57E-02 | up CINSARC High vs. Low |
| SPRR3      | small proline rich protein 3   | 1q21.3       | 6707              | 0.56                    | 1.21                     | 0.65                        | 2.81 | 5.31E-03 | 2.61E-02 | up CINSARC High vs. Low |
| ALDH3B2    | aldehyde dehydrogenase 3       | 11q13.2      | 222               | 9.67                    | 10.39                    | 0.72                        | 2.81 | 5.36E-03 | 2.63E-02 | up CINSARC High vs. Low |
| CBLN1      | cerebellin 1 precursor         | 16q12.1      | 869               | 2.31                    | 2.98                     | 0.67                        | 2.80 | 5.37E-03 | 2.63E-02 | up CINSARC High vs. Low |
| POF1B      | POF1B actin binding protei     | Xq21.1       | 79983             | 4.51                    | 5.50                     | 0.99                        | 2.80 | 5.40E-03 | 2.64E-02 | up CINSARC High vs. Low |
| FERMT1     | fermitin family member 1       | 20p12.3      | 55612             | 2.81                    | 3.43                     | 0.62                        | 2.77 | 5.88E-03 | 2.81E-02 | up CINSARC High vs. Low |
| FCRL3      | Fc receptor like 3             | 1q23.1       | 115352            | 2.39                    | 2.99                     | 0.60                        | 2.75 | 6.37E-03 | 2.97E-02 | up CINSARC High vs. Low |
| AOX1       | aldehyde oxidase 1             | 2q33.1       | 316               | 6.08                    | 6.67                     | 0.59                        | 2.74 | 6.44E-03 | 3.00E-02 | up CINSARC High vs. Low |
| NMNA2      | nicotinamide nucleotide ad     | 1q25.3       | 23057             | 4.46                    | 5.13                     | 0.67                        | 2.74 | 6.48E-03 | 3.01E-02 | up CINSARC High vs. Low |
| KIAA0319   | KIAA0319                       | 6p22.3       | 9856              | 3.63                    | 4.36                     | 0.74                        | 2.73 | 6.63E-03 | 3.05E-02 | up CINSARC High vs. Low |
| RSPO4      | R-spondin 4                    | 20p13        | 343637            | 1.89                    | 2.49                     | 0.59                        | 2.73 | 6.70E-03 | 3.07E-02 | up CINSARC High vs. Low |
| FRAS1      | Fraser extracellular matrix    | 4q21.21      | 80144             | 5.64                    | 6.28                     | 0.63                        | 2.73 | 6.70E-03 | 3.07E-02 | up CINSARC High vs. Low |
| TMEM108    | transmembrane protein 10       | 3q22.1       | 66000             | 4.34                    | 4.94                     | 0.60                        | 2.73 | 6.71E-03 | 3.07E-02 | up CINSARC High vs. Low |
| ACTN2      | actinin alpha 2                | 1q43         | 88                | 1.90                    | 2.68                     | 0.78                        | 2.70 | 7.23E-03 | 3.25E-02 | up CINSARC High vs. Low |
| ELFN2      | extracellular leucine rich r   | 22q13.1      | 114794            | 2.88                    | 3.64                     | 0.76                        | 2.70 | 7.30E-03 | 3.27E-02 | up CINSARC High vs. Low |
| AOC1       | amine oxidase copper cont      | 7q36.1       | 26                | 3.06                    | 3.80                     | 0.74                        | 2.70 | 7.42E-03 | 3.31E-02 | up CINSARC High vs. Low |
| GJB3       | gap junction protein beta 3    | 1p34.3       | 2707              | 2.29                    | 2.88                     | 0.59                        | 2.68 | 7.71E-03 | 3.40E-02 | up CINSARC High vs. Low |
| CYP4F3     | cytochrome P450 family 4       | 19p13.12     | 4051              | 2.02                    | 2.68                     | 0.66                        | 2.68 | 7.72E-03 | 3.40E-02 | up CINSARC High vs. Low |
| GAGE2D     | G antigen 2D                   | Xp11.23      | 729408            | 0.19                    | 0.81                     | 0.63                        | 2.68 | 7.75E-03 | 3.41E-02 | up CINSARC High vs. Low |
| FDSP       | follicular dendritic cell secr | 4q13.3/q413  | 260436            | 1.65                    | 2.41                     | 0.76                        | 2.66 | 8.22E-03 | 3.54E-02 | up CINSARC High vs. Low |
| EREG       | epiregulin                     | 4q13.3       | 2069              | 1.53                    | 2.17                     | 0.64                        | 2.66 | 8.35E-03 | 3.58E-02 | up CINSARC High vs. Low |
| PLAC4      | placenta enriched 4            | 21q22.2      | 191585            | 1.86                    | 2.53                     | 0.66                        | 2.65 | 8.37E-03 | 3.58E-02 | up CINSARC High vs. Low |
| PALM3      | paralemnin 3                   | 19p13.12     | 342979            | 4.22                    | 4.83                     | 0.61                        | 2.65 | 8.57E-03 | 3.64E-02 | up CINSARC High vs. Low |
| DSC3       | desmocollin 3                  | 18q12.1      | 1825              | 4.19                    | 4.93                     | 0.75                        | 2.63 | 8.89E-03 | 3.73E-02 | up CINSARC High vs. Low |
| HOXC10     | homeobox C10                   | 12q13.13     | 3226              | 7.48                    | 8.47                     | 0.99                        | 2.63 | 8.96E-03 | 3.75E-02 | up CINSARC High vs. Low |
| FOLR1      | folate receptor 1              | 11q13.4      | 2348              | 2.63                    | 3.43                     | 0.79                        | 2.63 | 8.99E-03 | 3.76E-02 | up CINSARC High vs. Low |
| MGAT5B     | alpha-1,6-mannosylglycopi      | 17q25.2      | 146664            | 3.27                    | 3.99                     | 0.72                        | 2.60 | 9.78E-03 | 3.99E-02 | up CINSARC High vs. Low |
| COCH       | cochlin                        | 14q12        | 1690              | 4.07                    | 4.86                     | 0.79                        | 2.60 | 9.83E-03 | 4.00E-02 | up CINSARC High vs. Low |
| SLC5A12    | solute carrier family 5 mem    | 11p14.2      | 159963            | 1.05                    | 1.70                     | 0.64                        | 2.59 | 1.00E-02 | 4.05E-02 | up CINSARC High vs. Low |
| BAMBI      | BMP and activin membran        | 10p12.1      | 25805             | 8.85                    | 9.53                     | 0.69                        | 2.58 | 1.05E-02 | 4.18E-02 | up CINSARC High vs. Low |
| RIMS1      | regulating synaptic membr      | 6q13         | 22999             | 4.09                    | 4.85                     | 0.76                        | 2.57 | 1.06E-02 | 4.20E-02 | up CINSARC High vs. Low |
| SLC6A11    | solute carrier family 6 mem    | 3p25.3       | 6538              | 1.53                    | 2.24                     | 0.71                        | 2.57 | 1.08E-02 | 4.25E-02 | up CINSARC High vs. Low |
| BEND7      | BEN domain containing 7        | 10p13        | 222389            | 5.99                    | 6.58                     | 0.59                        | 2.57 | 1.08E-02 | 4.26E-02 | up CINSARC High vs. Low |
| SIX1       | SIX homeobox 1                 | 14q23.1      | 6495              | 7.71                    | 8.46                     | 0.75                        | 2.53 | 1.18E-02 | 4.50E-02 | up CINSARC High vs. Low |
| AQP9       | aquaporin 9                    | 15q21.3      | 366               | 4.53                    | 5.14                     | 0.61                        | 2.52 | 1.21E-02 | 4.59E-02 | up CINSARC High vs. Low |
| ATP6VOA4   | ATPase H+ transporting Vt      | 7q34         | 50617             | 3.42                    | 4.29                     | 0.87                        | 2.52 | 1.22E-02 | 4.59E-02 | up CINSARC High vs. Low |
| GABRP      | gamma-aminobutyric acid I      | 5q35.1       | 2568              | 4.76                    | 5.55                     | 0.79                        | 2.52 | 1.23E-02 | 4.63E-02 | up CINSARC High vs. Low |
| LY6K       | lymphocyte antigen 6 famil     | 8q24.3       | 54742             | 4.41                    | 5.13                     | 0.72                        | 2.50 | 1.28E-02 | 4.73E-02 | up CINSARC High vs. Low |
| TRPA1      | transient receptor potential   | 8q21.11      | 8989              | 3.94                    | 4.98                     | 1.04                        | 2.50 | 1.31E-02 | 4.79E-02 | up CINSARC High vs. Low |
| JCHAIN     | joining chain of multimeric    | 4q13.3       | 3512              | 8.28                    | 9.05                     | 0.77                        | 2.50 | 1.31E-02 | 4.80E-02 | up CINSARC High vs. Low |
| PTPRZ1     | protein tyrosine phosphata     | 7q31.32      | 5803              | 1.70                    | 2.31                     | 0.61                        | 2.49 | 1.31E-02 | 4.81E-02 | up CINSARC High vs. Low |
| MAGEA6     | MAGE family member A6          | Xq28         | 4105              | 0.96                    | 1.85                     | 0.90                        | 2.49 | 1.33E-02 | 4.84E-02 | up CINSARC High vs. Low |
| PRSS1      | serine protease 1              | 7q34         | 5644              | 1.02                    | 1.76                     | 0.74                        | 2.49 | 1.34E-02 | 4.86E-02 | up CINSARC High vs. Low |
| ZNF492     | zinc finger protein 492        | 19p12        | 57615             | 2.40                    | 3.00                     | 0.59                        | 2.49 | 1.34E-02 | 4.86E-02 | up CINSARC High vs. Low |
| TSPYL5     | TSPY like 5                    | 8q22.1       | 85453             | 8.32                    | 8.92                     | 0.60                        | 2.47 | 1.40E-02 | 0.050    | up CINSARC High vs. Low |
| VSTM2A     | V-set and transmembrane        | 7p11.2       | 222008            | 3.46                    | 4.74                     | 1.29                        | 2.47 | 1.41E-02 | 0.050    | up CINSARC High vs. Low |
| PKIA       | cAMP-dependent protein k       | 8q21.13      | 5569              | 4.37                    | 4.97                     | 0.60                        | 2.45 | 1.49E-02 | 0.052    | up CINSARC High vs. Low |
| SLC6A14    | solute carrier family 6 mem    | Xq23         | 11254             | 1.98                    | 2.57                     | 0.59                        | 2.45 | 1.49E-02 | 0.052    | up CINSARC High vs. Low |
| MAGEA3     | MAGE family member A3          | Xq28         | 4102              | 0.93                    | 1.79                     | 0.86                        | 2.45 | 1.50E-02 | 0.053    | up CINSARC High vs. Low |
| CDK5R2     | cyclin dependent kinase 5      | 2q35         | 8941              | 0.90                    | 1.51                     | 0.61                        | 2.43 | 1.59E-02 | 0.055    | up CINSARC High vs. Low |
| PAX2       | paired box 2                   | 10q24.31     | 5076              | 3.49                    | 4.22                     | 0.74                        | 2.42 | 1.63E-02 | 0.055    | up CINSARC High vs. Low |
| TRIM36     | tripartite motif containing 3  | 5q22.3       | 55521             | 6.91                    | 7.53                     | 0.62                        | 2.41 | 1.63E-02 | 0.056    | up CINSARC High vs. Low |
| SPTSSB     | serine palmitoyltransferase    | 3q26.1       | 165679            | 7.03                    | 7.82                     | 0.79                        | 2.41 | 1.67E-02 | 0.057    | up CINSARC High vs. Low |
| CACNG6     | calcium voltage-gated chai     | 19q13.42     | 59285             | 1.64                    | 2.47                     | 0.82                        | 2.40 | 1.68E-02 | 0.057    | up CINSARC High vs. Low |
| MKRN3      | makorin ring finger protein    | 15q11.2      | 7681              | 2.02                    | 2.71                     | 0.69                        | 2.39 | 1.73E-02 | 0.058    | up CINSARC High vs. Low |
| GLYATL3    | glycine-N-acyltransferase I    | 6p12.3       | 389396            | 0.52                    | 1.11                     | 0.59                        | 2.38 | 1.79E-02 | 0.059    | up CINSARC High vs. Low |
| CELF3      | CUGBP Elav-like family mc      | 1q21.3       | 11189             | 1.79                    | 2.44                     | 0.66                        | 2.38 | 1.79E-02 | 0.059    | up CINSARC High vs. Low |
| DQX1       | DEAQ-box RNA dependen          | 2p13.1       | 165545            | 4.08                    | 4.72                     | 0.63                        | 2.37 | 1.83E-02 | 0.060    | up CINSARC High vs. Low |
| LRAT       | lecithin retinol acyltransfer  | 4q32.1       | 9227              | 3.08                    | 3.76                     | 0.68                        | 2.36 | 1.91E-02 | 0.061    | up CINSARC High vs. Low |
| DPYSL5     | dihydropyrimidinase like 5     | 2p23.3       | 56896             | 1.03                    | 1.66                     | 0.63                        | 2.35 | 1.93E-02 | 0.062    | up CINSARC High vs. Low |
| ASIC2      | acid sensing ion channel s     | 17q11.2-q12  | 40                | 2.14                    | 2.88                     | 0.74                        | 2.35 | 1.94E-02 | 0.062    | up CINSARC High vs. Low |
| RASAL1     | RAS protein activator like 1   | 12q24.13     | 8437              | 2.83                    | 3.43                     | 0.60                        | 2.34 | 1.97E-02 | 0.063    | up CINSARC High vs. Low |
| KCNK3      | potassium two pore domai       | 2p23.3       | 3777              | 3.94                    | 4.69                     | 0.75                        | 2.34 | 2.00E-02 | 0.063    | up CINSARC High vs. Low |
| BRINP3     | BMP/retinoic acid inducible    | 1q31.1       | 339479            | 0.97                    | 1.80                     | 0.83                        | 2.33 | 2.04E-02 | 0.064    | up CINSARC High vs. Low |
| PCSK2      | proprotein convertase subf     | 20p12.1      | 5126              | 1.18                    | 1.95                     | 0.77                        | 2.32 | 2.08E-02 | 0.065    | up CINSARC High vs. Low |
| SERPINA5   | serpin family A member 5       | 14q32.13     | 5104              | 9.36                    | 10.13                    | 0.76                        | 2.31 | 2.14E-02 | 0.066</  |                         |

| Symbol   | description                                         | Cytoband     | Entrez Gene ID | Low-risk (mean, log2) | High-risk (mean, log2) | High vs.Low (log2-ratio) | t     | p-value  | q-value  | Associated to             |
|----------|-----------------------------------------------------|--------------|----------------|-----------------------|------------------------|--------------------------|-------|----------|----------|---------------------------|
| TMEM150C | transmembrane protein 15i                           | 4q21.22      | 441027         | 8.09                  | 8.83                   | 0.74                     | 2.27  | 2.42E-02 | 0.071    | up CINSARC High vs. Low   |
| B3GNT3   | UDP-GlcNAc:betaGal beta                             | 19p13.11     | 10331          | 3.46                  | 4.06                   | 0.60                     | 2.26  | 2.48E-02 | 0.072    | up CINSARC High vs. Low   |
| DSG3     | desmoglein 3                                        | 18q12.1      | 1830           | 3.18                  | 3.86                   | 0.68                     | 2.25  | 2.51E-02 | 0.073    | up CINSARC High vs. Low   |
| CXCL9    | C-X-C motif chemokine ligand 9                      | 4q21.1       | 4283           | 8.58                  | 9.20                   | 0.62                     | 2.24  | 2.60E-02 | 0.074    | up CINSARC High vs. Low   |
| HOXC11   | homeobox C11                                        | 12q13.13     | 3227           | 4.81                  | 5.62                   | 0.81                     | 2.19  | 2.90E-02 | 0.080    | up CINSARC High vs. Low   |
| CCL21    | C-C motif chemokine ligand 21                       | 9p13.3       | 6366           | 4.47                  | 5.12                   | 0.65                     | 2.19  | 2.92E-02 | 0.080    | up CINSARC High vs. Low   |
| MAGEA12  | MAGE family member A12                              | Xq28         | 4111           | 0.69                  | 1.30                   | 0.61                     | 2.16  | 3.13E-02 | 0.083    | up CINSARC High vs. Low   |
| BPIFB1   | BPI fold containing family E member 1               | 20q11.21     | 92747          | 6.73                  | 7.42                   | 0.69                     | 2.16  | 3.14E-02 | 0.084    | up CINSARC High vs. Low   |
| SLC4A10  | solute carrier family 4 member 10                   | 2q24.2       | 57282          | 2.28                  | 3.01                   | 0.72                     | 2.15  | 3.20E-02 | 0.085    | up CINSARC High vs. Low   |
| LEP      | leptin                                              | 7q32.1       | 3952           | 2.67                  | 3.31                   | 0.64                     | 2.15  | 3.26E-02 | 0.086    | up CINSARC High vs. Low   |
| ADGRV1   | adhesion G protein-coupled receptor 1               | 5q14.3       | 84059          | 7.31                  | 8.00                   | 0.69                     | 2.13  | 3.43E-02 | 0.088    | up CINSARC High vs. Low   |
| ZIC2     | Zic family member 2                                 | 13q32.3      | 7546           | 3.15                  | 3.87                   | 0.72                     | 2.12  | 3.48E-02 | 0.089    | up CINSARC High vs. Low   |
| PLA2G2D  | phospholipase A2 group III                          | 1p36.12      | 26279          | 3.45                  | 4.06                   | 0.61                     | 2.11  | 3.60E-02 | 0.091    | up CINSARC High vs. Low   |
| MUCL1    | mucin like 1                                        | 12q13.2      | 118430         | 5.19                  | 6.03                   | 0.84                     | 2.10  | 3.66E-02 | 0.092    | up CINSARC High vs. Low   |
| KRT6B    | keratin 6B                                          | 12q13.13     | 3854           | 3.97                  | 4.70                   | 0.73                     | 2.08  | 3.79E-02 | 0.094    | up CINSARC High vs. Low   |
| ALOX15   | arachidonate 15-lipoxygenase                        | 17p13.2      | 246            | 3.70                  | 4.32                   | 0.62                     | 2.06  | 4.05E-02 | 0.098    | up CINSARC High vs. Low   |
| OLFM4    | olfactomedin 4                                      | 13q14.3      | 10562          | 2.74                  | 3.47                   | 0.73                     | 2.05  | 4.12E-02 | 0.099    | up CINSARC High vs. Low   |
| GRPR     | gastrin releasing peptide receptor                  | Xp22.2       | 2925           | 7.32                  | 6.62                   | -0.70                    | -2.04 | 4.20E-02 | 0.100    | down CINSARC High vs. Low |
| SLC7A2   | solute carrier family 7 member 2                    | 8p22         | 6542           | 11.97                 | 11.32                  | -0.65                    | -2.06 | 4.04E-02 | 0.097    | down CINSARC High vs. Low |
| CST9     | cystatin 9                                          | 20p11.21     | 128822         | 5.59                  | 4.69                   | -0.90                    | -2.06 | 4.02E-02 | 0.097    | down CINSARC High vs. Low |
| INSYNA   | inhibitory synaptic factor 2                        | 10q26.2      | 642938         | 6.62                  | 5.87                   | -0.75                    | -2.07 | 3.95E-02 | 0.096    | down CINSARC High vs. Low |
| RG22     | regulator of G protein signaling 22                 | 8q22.2       | 26166          | 6.53                  | 5.92                   | -0.60                    | -2.07 | 3.91E-02 | 0.095    | down CINSARC High vs. Low |
| FOX11    | forkhead box O11                                    | 5q35.1       | 2299           | 5.47                  | 4.60                   | -0.86                    | -2.09 | 3.73E-02 | 0.093    | down CINSARC High vs. Low |
| ANKRD30A | ankyrin repeat domain 30A                           | 10p11.21     | 91074          | 8.34                  | 7.36                   | -0.98                    | -2.09 | 3.71E-02 | 0.092    | down CINSARC High vs. Low |
| TNNI3    | troponin I3, cardiac type                           | 19q13.42     | 7137           | 3.14                  | 2.48                   | -0.66                    | -2.10 | 3.63E-02 | 0.091    | down CINSARC High vs. Low |
| CITED1   | Cbp/p300 interacting transcription factor 1         | Xq13.1       | 4435           | 4.72                  | 4.10                   | -0.61                    | -2.13 | 3.38E-02 | 0.087    | down CINSARC High vs. Low |
| PDZK1IP1 | PDZK1 interacting protein 1                         | 1p33         | 10158          | 7.23                  | 6.52                   | -0.71                    | -2.14 | 3.32E-02 | 0.086    | down CINSARC High vs. Low |
| KRT15    | keratin 15                                          | 17q21.2      | 3866           | 8.56                  | 7.89                   | -0.67                    | -2.17 | 3.05E-02 | 0.082    | down CINSARC High vs. Low |
| SYT13    | synaptotagmin 13                                    | 11p11.2      | 57586          | 9.36                  | 8.38                   | -0.98                    | -2.20 | 2.85E-02 | 0.079    | down CINSARC High vs. Low |
| WFDC2    | WAP four-disulfide core domain 2                    | 20q13.12     | 10406          | 9.53                  | 8.69                   | -0.84                    | -2.22 | 2.72E-02 | 0.076    | down CINSARC High vs. Low |
| TMEM145  | transmembrane protein 145                           | 19q13.2      | 284339         | 5.73                  | 5.13                   | -0.60                    | -2.23 | 2.67E-02 | 0.076    | down CINSARC High vs. Low |
| ORM1     | orosomucoid 1                                       | 9q32         | 5004           | 3.43                  | 2.67                   | -0.76                    | -2.23 | 2.64E-02 | 0.075    | down CINSARC High vs. Low |
| AGTR1    | angiotensin II receptor type 1                      | 3q24         | 185            | 7.59                  | 6.75                   | -0.84                    | -2.23 | 2.63E-02 | 0.075    | down CINSARC High vs. Low |
| MUC1     | mucin 1, cell surface associated                    | 1q22         | 4582           | 12.88                 | 12.29                  | -0.59                    | -2.26 | 2.43E-02 | 0.071    | down CINSARC High vs. Low |
| IGSF21   | immunoglobulin superfamily member 21                | 1p36.13      | 84966          | 6.59                  | 5.97                   | -0.63                    | -2.27 | 2.39E-02 | 0.071    | down CINSARC High vs. Low |
| CCNO     | cyclin O                                            | 5q11.2       | 10309          | 6.65                  | 5.85                   | -0.80                    | -2.28 | 2.35E-02 | 0.070    | down CINSARC High vs. Low |
| ORM2     | orosomucoid 2                                       | 9q32         | 5005           | 2.41                  | 1.76                   | -0.65                    | -2.28 | 2.32E-02 | 0.069    | down CINSARC High vs. Low |
| SP5      | Sp5 transcription factor                            | 2q31.1       | 389058         | 3.73                  | 3.10                   | -0.63                    | -2.30 | 2.23E-02 | 0.067    | down CINSARC High vs. Low |
| DLX2     | distal-less homeobox 2                              | 2q31.1       | 1746           | 3.32                  | 2.63                   | -0.70                    | -2.30 | 2.21E-02 | 0.067    | down CINSARC High vs. Low |
| SEZ6L    | seizure related 6 homolog                           | 22q12.1      | 23544          | 4.29                  | 3.44                   | -0.85                    | -2.32 | 2.13E-02 | 0.066    | down CINSARC High vs. Low |
| COL4A6   | collagen type IV alpha 6 chain                      | Xq22.3       | 1288           | 5.23                  | 4.56                   | -0.66                    | -2.32 | 2.11E-02 | 0.065    | down CINSARC High vs. Low |
| CCDC196  | coiled-coil domain containing 196                   | 14q23.3      | 440184         | 2.47                  | 1.85                   | -0.62                    | -2.33 | 2.07E-02 | 0.065    | down CINSARC High vs. Low |
| KCNE4    | potassium voltage-gated channel accessory protein 4 | 2q36.1       | 23704          | 9.70                  | 9.05                   | -0.65                    | -2.34 | 1.98E-02 | 0.063    | down CINSARC High vs. Low |
| NDP      | norrin cystine knot growth factor 1                 | Xp11.3       | 4693           | 4.74                  | 3.90                   | -0.84                    | -2.34 | 1.97E-02 | 0.063    | down CINSARC High vs. Low |
| SLC7A4   | solute carrier family 7 member 4                    | 22q11.21     | 6545           | 4.24                  | 3.34                   | -0.90                    | -2.35 | 1.93E-02 | 0.062    | down CINSARC High vs. Low |
| DOK7     | docking protein 7                                   | 4p16.3       | 285489         | 7.27                  | 6.65                   | -0.61                    | -2.36 | 1.87E-02 | 0.061    | down CINSARC High vs. Low |
| ATPIA4   | ATPase Na+/K+ transporting protein 4                | 1q23.2       | 480            | 4.27                  | 3.68                   | -0.60                    | -2.38 | 1.78E-02 | 0.059    | down CINSARC High vs. Low |
| PHGR1    | proline, histidine and glycine-rich protein 1       | 15q15.1      | 644844         | 3.44                  | 2.68                   | -0.75                    | -2.40 | 1.71E-02 | 0.058    | down CINSARC High vs. Low |
| CYP2A7   | cytochrome P450 family 2 member A7                  | 19q13.2      | 1549           | 3.07                  | 2.16                   | -0.90                    | -2.40 | 1.71E-02 | 0.058    | down CINSARC High vs. Low |
| MYO3B    | myosin IIB                                          | 2q31.1       | 140469         | 3.21                  | 2.49                   | -0.72                    | -2.44 | 1.54E-02 | 0.054    | down CINSARC High vs. Low |
| GRIA2    | glutamate ionotropic receptor NR2B subunit 2        | 4q32.1       | 2891           | 5.40                  | 4.21                   | -1.20                    | -2.45 | 1.47E-02 | 0.052    | down CINSARC High vs. Low |
| CARTPT   | CART prepropeptide                                  | 5q13.2       | 9607           | 2.21                  | 1.20                   | -1.01                    | -2.46 | 1.44E-02 | 0.051    | down CINSARC High vs. Low |
| RHBDL3   | rhomoid like 3                                      | 17q11.2      | 162494         | 4.57                  | 3.93                   | -0.64                    | -2.48 | 1.37E-02 | 4.94E-02 | down CINSARC High vs. Low |
| TPSG1    | trypsinogen gamma 1                                 | 16p13.3      | 25823          | 4.84                  | 4.09                   | -0.75                    | -2.50 | 1.31E-02 | 4.80E-02 | down CINSARC High vs. Low |
| C19orf33 | chromosome 19 open reading frame 33                 | 19q13.2      | 64073          | 8.17                  | 7.44                   | -0.73                    | -2.52 | 1.22E-02 | 4.60E-02 | down CINSARC High vs. Low |
| MPPED1   | metallophosphoesterase domain containing 1          | 22q13.2      | 758            | 2.15                  | 1.49                   | -0.66                    | -2.55 | 1.12E-02 | 4.37E-02 | down CINSARC High vs. Low |
| CFAP221  | cilia and flagella associated protein 221           | 2q14.2       | 200373         | 3.14                  | 2.46                   | -0.67                    | -2.56 | 1.11E-02 | 4.33E-02 | down CINSARC High vs. Low |
| CHRD     | chordin                                             | 3q27.1       | 8646           | 8.51                  | 7.92                   | -0.59                    | -2.57 | 1.06E-02 | 4.21E-02 | down CINSARC High vs. Low |
| TUBA3D   | tubulin alpha 3D                                    | 2q21.1       | 113457         | 5.81                  | 4.98                   | -0.83                    | -2.60 | 9.72E-03 | 3.97E-02 | down CINSARC High vs. Low |
| FGF10    | fibroblast growth factor 10                         | 5p12         | 2255           | 3.66                  | 2.77                   | -0.89                    | -2.60 | 9.72E-03 | 3.97E-02 | down CINSARC High vs. Low |
| ZNF385D  | zinc finger protein 385D                            | 3p24.3       | 79750          | 4.61                  | 3.98                   | -0.63                    | -2.62 | 9.13E-03 | 3.80E-02 | down CINSARC High vs. Low |
| GJA1     | gap junction protein alpha 1                        | 6q22.31      | 2697           | 12.20                 | 11.58                  | -0.62                    | -2.68 | 7.79E-03 | 3.42E-02 | down CINSARC High vs. Low |
| CDHR4    | cadherin related family member 4                    | 3p21.31      | 389118         | 2.12                  | 1.47                   | -0.65                    | -2.68 | 7.69E-03 | 3.39E-02 | down CINSARC High vs. Low |
| PPP1R36  | protein phosphatase 1 regulatory subunit 36         | 14q23.3      | 145376         | 4.44                  | 3.84                   | -0.59                    | -2.69 | 7.59E-03 | 3.36E-02 | down CINSARC High vs. Low |
| PHYHD1   | phytyl-CoA dioxygenase 1                            | 9q34.11      | 254295         | 7.70                  | 7.00                   | -0.70                    | -2.70 | 7.35E-03 | 3.28E-02 | down CINSARC High vs. Low |
| KLHL1    | kelch like family member 1                          | 13q21.33     | 57626          | 1.40                  | 0.64                   | -0.76                    | -2.71 | 7.14E-03 | 3.22E-02 | down CINSARC High vs. Low |
| CLIC6    | chloride intracellular channel protein 6            | 21q22.12     | 54102          | 8.94                  | 7.82                   | -1.12                    | -2.73 | 6.78E-03 | 3.10E-02 | down CINSARC High vs. Low |
| TTCC2    | tetratricopeptide repeat domain containing 2        | 1p32.3       | 55001          | 4.45                  | 3.72                   | -0.73                    | -2.74 | 6.58E-03 | 3.04E-02 | down CINSARC High vs. Low |
| CFB      | complement factor B                                 | 6p21.33      | 629            | 12.82                 | 12.02                  | -0.80                    | -2.74 | 6.52E-03 | 3.02E-02 | down CINSARC High vs. Low |
| DMKN     | dermokine                                           | 19q13.12     | 93099          | 7.49                  | 6.80                   | -0.68                    | -2.75 | 6.31E-03 | 2.96E-02 | down CINSARC High vs. Low |
| SEC14L5  | SEC14 like lipid binding domain containing 5        | 16p13.3      | 9717           | 3.41                  | 2.79                   | -0.62                    | -2.76 | 6.14E-03 | 2.90E-02 | down CINSARC High vs. Low |
| NAT1     | N-acetyltransferase 1                               | 8p22         | 9              | 11.23                 | 10.52                  | -0.71                    | -2.80 | 5.46E-03 | 2.65E-02 | down CINSARC High vs. Low |
| STC2     | stanniocalcin 2                                     | 5q35.2       | 8614           | 12.84                 | 12.05                  | -0.79                    | -2.80 | 5.41E-03 | 2.64E-02 | down CINSARC High vs. Low |
| C5orf38  | chromosome 5 open reading frame 38                  | 5p15.33      | 153571         | 6.08                  | 5.41                   | -0.67                    | -2.80 | 5.41E-03 | 2.64E-02 | down CINSARC High vs. Low |
| SKIDA1   | SKI/DACH domain containing 1                        | 10p12.31     | 387640         | 4.25                  | 3.64                   | -0.61                    | -2.81 | 5.32E-03 | 2.62E-02 | down CINSARC High vs. Low |
| SYT12    | synaptotagmin 12                                    | 11q13.2      | 91683          | 8.95                  | 8.32                   | -0.63                    | -2.82 | 5.16E-03 | 2.56E-02 | down CINSARC High vs. Low |
| CDSN     | corneodesmosin                                      | 6p21.33      | 1041           | 6.01                  | 5.21                   | -0.80                    | -2.82 | 5.15E-03 | 2.56E-02 | down CINSARC High vs. Low |
| CHI3L2   | chitinase 3 like 2                                  | 1p13.2       | 1117           | 6.57                  | 5.78                   | -0.79                    | -2.84 | 4.80E-03 | 2.45E-02 | down CINSARC High vs. Low |
| GALNT5   | polypeptide N-acetylgalactosaminyltransferase 5     | 2q24.1       | 11227          | 6.98                  | 6.29                   | -0.69                    | -2.85 | 4.73E-03 | 2.43E-02 | down CINSARC High vs. Low |
| CST5     | cystatin D                                          | 20p11.21     | 1473           | 4.15                  | 2.93                   | -1.22                    | -2.87 | 4.41E-03 | 2.32E-02 | down CINSARC High vs. Low |
| CCDC65   | coiled-coil domain containing 65                    | 12q13.12     | 85478          | 4.25                  | 3.62                   | -0.63                    | -2.88 | 4.28E-03 | 2.27E-02 | down CINSARC High vs. Low |
| ENTPD8   | ectonucleoside triphosphatase 8                     | 9q34.3       | 377841         | 5.90                  | 5.22                   | -0.68                    | -2.88 | 4.27E-03 | 2.27E-02 | down CINSARC High vs. Low |
| RANBP3L  | RAN binding protein 3 like                          | 5p13.2       | 202151         | 5.28                  | 4.54                   | -0.74                    | -2.88 | 4.26E-03 | 2.27E-02 | down CINSARC High vs. Low |
| P2RY11   | purinergic receptor P2Y11                           | 19p13.2      | 5032           | 6.26                  | 5.45                   | -0.81                    | -2.90 | 4.04E-03 | 2.19E-02 | down CINSARC High vs. Low |
| CHST8    | carbohydrate sulfotransferase 8                     | 19q13.11     | 64377          | 6.87                  | 5.87                   | -1.00                    | -2.93 | 3.70E-03 | 2.08E-02 | down CINSARC High vs. Low |
| PGR      | progesterone receptor                               | 11q22.1      | 5241           | 10.63                 | 9.62                   | -1.01                    | -2.93 | 3.62E-03 | 2.05E-02 | down CINSARC High vs. Low |
| ACSM1    | acyl-CoA synthetase medium chain                    | 16p12.3      | 116285         | 5.00                  | 4.41                   | -0.59                    | -2.98 | 3.16E-03 | 1.86E-02 | down CINSARC High vs. Low |
| CA14     | carbonic anhydrase 14                               | 1q21.2       | 23632          | 4.40                  | 3.80                   | -0.60                    | -2.99 | 3.01E-03 | 1.80E-02 | down CINSARC High vs. Low |
| SPTBN4   | spectrin beta, non-erythrocytic 4                   | 19q13.2      | 57731          | 6.37                  | 5.76                   | -0.61                    | -3.01 | 2.83E-03 | 1.73E-02 | down CINSARC High vs. Low |
| RAB38    | RAB38, member RAS oncogene family                   | 11q14.2      | 23682          | 7.07                  | 6.29                   | -0.78                    | -3.01 | 2.79E-03 | 1.72E-02 | down CINSARC High vs. Low |
| SERPINA6 | serpin family A member 6                            | 14q32.13     | 866            | 6.19                  | 4.60                   | -1.59                    | -3.02 | 2.76E-03 | 1.70E-02 | down CINSARC High vs. Low |
| SEC14L2  | SEC14 like lipid binding domain containing 2        | 22q12.2      | 23541          | 10.14                 | 9.45                   | -0.69                    | -3.04 | 2.54E-03 | 1.62E-02 | down CINSARC High vs. Low |
| TDRD1    | tudor domain containing 1                           | 10q25.3      | 56165          | 2.84                  | 1.94                   | -0.90                    | -3.10 | 2.14E-03 | 1.45E-02 | down CINSARC High vs. Low |
| CLDN1    | claudin 1                                           | 3q28         | 9076           | 7.64                  | 7.04                   | -0.61                    | -3.10 | 2.13E-03 | 1.44E-02 | down CINSARC High vs. Low |
| FBXO2    | F-box protein 2                                     | 1p36.22      | 26232          | 7.70                  | 6.97                   | -0.73                    | -3.10 | 2.12E-03 | 1.44E-02 | down CINSARC High vs. Low |
| LACRT    | lacritin                                            | 12q13.2      | 90070          | 1.10                  | 0.36                   | -0.74                    | -3.10 | 2.11E-03 | 1.44E-02 | down CINSARC High vs. Low |
| MPV17L   | MPV17 mitochondrial inner membrane protein 17L      | 16p13.11     | 255027         | 7.87                  | 7.15                   | -0.73                    | -3.13 | 1.92E-03 | 1.35E-02 | down CINSARC High vs. Low |
| MYBPC1   | myosin binding protein C, cardiac                   | 12q23.2      | 4604           | 3.84                  | 2.61                   | -1.23                    | -3.17 | 1.67E-03 | 1.22E-02 | down CINSARC High vs. Low |
| TMPRSS6  | transmembrane serine protease 6                     | 22q12.3      | 164656         | 7.10                  | 6.17                   | -0.92                    | -3.18 | 1.60E-03 | 1.19E-02 | down CINSARC High vs. Low |
| NEK10    | NIMA related kinase 10                              | 3p24.1       | 152110         | 6.88                  | 5.96                   | -0.91                    | -3.21 | 1.46E-03 | 1.11E-02 | down CINSARC High vs. Low |
| ZNF385B  | zinc finger protein 385B                            | 2q31.2-q31.3 | 151126         | 6.91                  | 4.78                   | -1.13                    | -3.28 | 1.15E-03 | 9.46E-03 | down CINSARC High vs. Low |
| REEP6    | re                                                  |              |                |                       |                        |                          |       |          |          |                           |

| Symbol              | description                   | Cytoband       | Entrez Gene ID | Low-risk (mean_log2) | High-risk (mean_log2) | High vs.Low (log2-ratio) | t     | p-value  | q-value  | Associated to             |
|---------------------|-------------------------------|----------------|----------------|----------------------|-----------------------|--------------------------|-------|----------|----------|---------------------------|
| <i>NXNL2</i>        | nucleoredoxin like 2          | 9q22.1         | 158046         | 4.63                 | 3.92                  | -0.71                    | -3.35 | 8.98E-04 | 7.91E-03 | down CINSARC High vs. Low |
| <i>PIP</i>          | prolactin induced protein     | 7q34           | 5304           | 9.20                 | 7.56                  | -1.63                    | -3.35 | 8.97E-04 | 7.91E-03 | down CINSARC High vs. Low |
| <i>ADCY1</i>        | adenylate cyclase 1           | 7p12.3         | 107            | 10.17                | 9.29                  | -0.88                    | -3.37 | 8.44E-04 | 7.55E-03 | down CINSARC High vs. Low |
| <i>GSTM2</i>        | glutathione S-transferase r   | 1p13.3         | 2946           | 9.37                 | 8.60                  | -0.77                    | -3.41 | 7.44E-04 | 6.89E-03 | down CINSARC High vs. Low |
| <i>GAD1</i>         | glutamate decarboxylase 1     | 2q31.1         | 2571           | 3.32                 | 2.31                  | -1.01                    | -3.44 | 6.68E-04 | 6.37E-03 | down CINSARC High vs. Low |
| <i>SEMA3B</i>       | semaphorin 3B                 | 3p21.31        | 7869           | 9.17                 | 8.45                  | -0.72                    | -3.45 | 6.43E-04 | 6.17E-03 | down CINSARC High vs. Low |
| <i>KCNQ3</i>        | potassium voltage-gated ci    | 1p13.2         | 3752           | 5.85                 | 4.94                  | -0.90                    | -3.49 | 5.65E-04 | 5.61E-03 | down CINSARC High vs. Low |
| <i>LINC00173</i>    | long intergenic non-protein   | 12q24.22       | 100287569      | 4.74                 | 4.03                  | -0.71                    | -3.49 | 5.51E-04 | 5.54E-03 | down CINSARC High vs. Low |
| <i>JHY</i>          | junctional cadherin comple    | 11q24.1        | 79864          | 7.04                 | 6.42                  | -0.62                    | -3.50 | 5.34E-04 | 5.41E-03 | down CINSARC High vs. Low |
| <i>RAMP3</i>        | receptor activity modifying   | 7p13           | 10268          | 8.85                 | 8.09                  | -0.76                    | -3.53 | 4.85E-04 | 5.04E-03 | down CINSARC High vs. Low |
| <i>KRT23</i>        | keratin 23                    | 17q21.2        | 25984          | 7.68                 | 6.55                  | -1.13                    | -3.53 | 4.76E-04 | 4.98E-03 | down CINSARC High vs. Low |
| <i>PSORS1C1</i>     | psoriasis susceptibility 1 ce | 6p21.33        | 170679         | 3.28                 | 2.67                  | -0.61                    | -3.54 | 4.65E-04 | 4.90E-03 | down CINSARC High vs. Low |
| <i>TEKT3</i>        | tektin 3                      | 17p12          | 64518          | 3.69                 | 3.04                  | -0.65                    | -3.54 | 4.64E-04 | 4.89E-03 | down CINSARC High vs. Low |
| <i>PTPRT</i>        | protein tyrosine phosphata    | 20q12-q13.11   | 11122          | 9.55                 | 8.29                  | -1.26                    | -3.59 | 3.88E-04 | 4.34E-03 | down CINSARC High vs. Low |
| <i>PPP4R4</i>       | protein phosphatase 4 regl    | 4q32.12-q32.13 | 57718          | 4.58                 | 3.37                  | -1.22                    | -3.59 | 3.80E-04 | 4.27E-03 | down CINSARC High vs. Low |
| <i>CFAP57</i>       | cilia and flagella associater | 1p34.2         | 149465         | 4.09                 | 3.44                  | -0.65                    | -3.60 | 3.72E-04 | 4.22E-03 | down CINSARC High vs. Low |
| <i>EGOT</i>         | eosinophil granule ontoger    | 3p26.1         | 100126791      | 4.28                 | 3.55                  | -0.73                    | -3.61 | 3.59E-04 | 4.13E-03 | down CINSARC High vs. Low |
| <i>FBXL16</i>       | F-box and leucine rich rept   | 16p13.3        | 146330         | 9.65                 | 8.94                  | -0.71                    | -3.61 | 3.58E-04 | 4.12E-03 | down CINSARC High vs. Low |
| <i>CLU</i>          | clusterin                     | 8p21.1         | 1191           | 13.35                | 12.74                 | -0.61                    | -3.62 | 3.45E-04 | 4.03E-03 | down CINSARC High vs. Low |
| <i>ADGRB2</i>       | adhesion G protein-couple     | 1p35.2         | 576            | 9.38                 | 8.69                  | -0.69                    | -3.62 | 3.42E-04 | 4.00E-03 | down CINSARC High vs. Low |
| <i>LINC00160</i>    | long intergenic non-protein   | 21q22.12       | 54064          | 3.26                 | 2.59                  | -0.67                    | -3.64 | 3.24E-04 | 3.87E-03 | down CINSARC High vs. Low |
| <i>PGHGG</i>        | protein-glucosylgalactosylf   | 11p15.5        | 80162          | 9.96                 | 9.17                  | -0.78                    | -3.64 | 3.24E-04 | 3.87E-03 | down CINSARC High vs. Low |
| <i>CCDC153</i>      | coiled-coil domain containi   | 11q23.3        | 283152         | 4.48                 | 3.77                  | -0.71                    | -3.64 | 3.17E-04 | 3.82E-03 | down CINSARC High vs. Low |
| <i>NTN4</i>         | netrin 4                      | 12q22          | 59277          | 10.61                | 9.76                  | -0.85                    | -3.68 | 2.80E-04 | 3.47E-03 | down CINSARC High vs. Low |
| <i>ABAT</i>         | 4-aminobutyrate aminotran     | 16p13.2        | 18             | 10.66                | 9.99                  | -0.67                    | -3.68 | 2.74E-04 | 3.41E-03 | down CINSARC High vs. Low |
| <i>PCP2</i>         | Purkinje cell protein 2       | 19p13.2        | 126006         | 5.73                 | 5.04                  | -0.68                    | -3.72 | 2.40E-04 | 3.13E-03 | down CINSARC High vs. Low |
| <i>ABLIM3</i>       | actin binding LIM protein fa  | 5q32           | 22885          | 9.47                 | 8.84                  | -0.64                    | -3.73 | 2.26E-04 | 3.00E-03 | down CINSARC High vs. Low |
| <i>GRIA1</i>        | glutamate ionotropic recep    | 5q33.2         | 2890           | 3.11                 | 1.85                  | -1.25                    | -3.76 | 2.01E-04 | 2.76E-03 | down CINSARC High vs. Low |
| <i>LOC100128239</i> | uncharacterized LOC1001:      | 11q25          | 100128239      | 3.45                 | 2.74                  | -0.70                    | -3.85 | 1.44E-04 | 2.14E-03 | down CINSARC High vs. Low |
| <i>TMEM63C</i>      | transmembrane protein 63      | 14q24.3        | 57156          | 9.14                 | 8.52                  | -0.61                    | -3.85 | 1.44E-04 | 2.13E-03 | down CINSARC High vs. Low |
| <i>TSNAN10</i>      | tetraspanin 10                | 17q25.3        | 83882          | 5.23                 | 4.47                  | -0.76                    | -3.87 | 1.31E-04 | 1.99E-03 | down CINSARC High vs. Low |
| <i>ARHGGEF37</i>    | Rho guanine nucleotide ex     | 5q32           | 389337         | 9.25                 | 8.66                  | -0.59                    | -3.89 | 1.24E-04 | 1.91E-03 | down CINSARC High vs. Low |
| <i>RAI2</i>         | retinoic acid induced 2       | Xp22.13        | 10742          | 8.76                 | 8.01                  | -0.75                    | -3.90 | 1.20E-04 | 1.85E-03 | down CINSARC High vs. Low |
| <i>TPRG1</i>        | tumor protein p63 regulater   | 3q28           | 285386         | 9.29                 | 8.09                  | -1.20                    | -3.95 | 9.91E-05 | 1.61E-03 | down CINSARC High vs. Low |
| <i>HPN</i>          | hepsin                        | 19q13.11       | 3249           | 9.95                 | 9.28                  | -0.67                    | -3.96 | 9.56E-05 | 1.57E-03 | down CINSARC High vs. Low |
| <i>CFAP70</i>       | cilia and flagella associater | 10q22.2        | 118491         | 6.74                 | 6.08                  | -0.66                    | -3.97 | 8.97E-05 | 1.50E-03 | down CINSARC High vs. Low |
| <i>ACMSD</i>        | aminocarboxymuconate se       | 2q21.3         | 130013         | 2.93                 | 1.74                  | -1.19                    | -4.02 | 7.27E-05 | 1.28E-03 | down CINSARC High vs. Low |
| <i>IGFALS</i>       | insulin like growth factor bi | 16p13.3        | 3483           | 5.90                 | 5.01                  | -0.90                    | -4.04 | 6.81E-05 | 1.21E-03 | down CINSARC High vs. Low |
| <i>GNMT</i>         | glycine N-methyltransferase   | 6p21.1         | 27232          | 4.91                 | 4.07                  | -0.85                    | -4.05 | 6.50E-05 | 1.18E-03 | down CINSARC High vs. Low |
| <i>ACADS</i>        | acyl-CoA dehydrogenase e      | 12q24.31       | 35             | 8.30                 | 7.68                  | -0.62                    | -4.06 | 6.16E-05 | 1.13E-03 | down CINSARC High vs. Low |
| <i>EPHX2</i>        | epoxide hydrolase 2           | 8p21.2-p21.1   | 2053           | 9.11                 | 8.41                  | -0.70                    | -4.11 | 5.20E-05 | 9.82E-04 | down CINSARC High vs. Low |
| <i>DCDC1</i>        | doublecortin domain contai    | 11p13          | 341019         | 3.39                 | 2.65                  | -0.74                    | -4.14 | 4.44E-05 | 8.68E-04 | down CINSARC High vs. Low |
| <i>IZUMO4</i>       | IZUMO family member 4         | 19p13.3        | 113177         | 4.65                 | 4.00                  | -0.65                    | -4.18 | 3.91E-05 | 7.85E-04 | down CINSARC High vs. Low |
| <i>C17orf107</i>    | chromosome 17 open read       | 17p13.2        | 100130311      | 6.27                 | 5.64                  | -0.63                    | -4.18 | 3.85E-05 | 7.74E-04 | down CINSARC High vs. Low |
| <i>NOSTRIN</i>      | nitric oxide synthase traffi  | 2q24.3         | 115677         | 8.83                 | 8.14                  | -0.69                    | -4.21 | 3.35E-05 | 6.91E-04 | down CINSARC High vs. Low |
| <i>ADAMTS13</i>     | ADAM metalloproteinase wi     | 9q34.2         | 11093          | 6.41                 | 5.82                  | -0.59                    | -4.22 | 3.20E-05 | 6.73E-04 | down CINSARC High vs. Low |
| <i>ZBTB16</i>       | zinc finger and BTB domai     | 11q23.2        | 7704           | 4.30                 | 3.29                  | -1.02                    | -4.26 | 2.69E-05 | 5.86E-04 | down CINSARC High vs. Low |
| <i>EFCAB6</i>       | EF-hand calcium binding d22   | q13.2-q13.31   | 64800          | 5.68                 | 5.08                  | -0.60                    | -4.34 | 1.95E-05 | 4.55E-04 | down CINSARC High vs. Low |
| <i>FCGBP</i>        | Fc fragment of IgG binding    | 19q13.2        | 8857           | 8.70                 | 7.76                  | -0.94                    | -4.38 | 1.66E-05 | 4.07E-04 | down CINSARC High vs. Low |
| <i>KCNQ3</i>        | potassium voltage-gated ci    | 8q24.22        | 3786           | 4.18                 | 3.43                  | -0.75                    | -4.40 | 1.48E-05 | 3.75E-04 | down CINSARC High vs. Low |
| <i>RSPH1</i>        | radial spoke head compon      | 21q22.3        | 89765          | 7.45                 | 6.75                  | -0.70                    | -4.42 | 1.38E-05 | 3.54E-04 | down CINSARC High vs. Low |
| <i>DEGS2</i>        | delta 4-desaturase, sphing    | 14q32.2        | 123099         | 10.61                | 9.83                  | -0.78                    | -4.43 | 1.35E-05 | 3.51E-04 | down CINSARC High vs. Low |
| <i>FSCN2</i>        | fascin actin-bundling protei  | 17q25.3        | 25794          | 4.55                 | 3.80                  | -0.74                    | -4.43 | 1.34E-05 | 3.49E-04 | down CINSARC High vs. Low |
| <i>PLD4</i>         | phospholipase D family me     | 14q32.33       | 122618         | 6.30                 | 5.53                  | -0.78                    | -4.43 | 1.34E-05 | 3.49E-04 | down CINSARC High vs. Low |
| <i>ZMYND10</i>      | zinc finger MYND-type con     | 3p21.31        | 51364          | 8.38                 | 7.71                  | -0.67                    | -4.46 | 1.16E-05 | 3.11E-04 | down CINSARC High vs. Low |
| <i>CHRNA2</i>       | cholinergic receptor nicotin  | 8p21.2         | 1135           | 1.22                 | 0.59                  | -0.63                    | -4.47 | 1.14E-05 | 3.07E-04 | down CINSARC High vs. Low |
| <i>WDR93</i>        | WD repeat domain 93           | 15q26.1        | 56964          | 5.13                 | 4.48                  | -0.65                    | -4.51 | 9.27E-06 | 2.65E-04 | down CINSARC High vs. Low |
| <i>CACNA1F</i>      | calcium voltage-gated chai    | Xp11.23        | 778            | 4.29                 | 3.21                  | -1.08                    | -4.56 | 7.51E-06 | 2.24E-04 | down CINSARC High vs. Low |
| <i>MDGA1</i>        | MAM domain containing gl      | 6p21.2         | 266727         | 7.17                 | 6.53                  | -0.64                    | -4.58 | 6.95E-06 | 2.09E-04 | down CINSARC High vs. Low |
| <i>SCUBE2</i>       | signal peptide, CUB domai     | 11p15.4        | 57758          | 12.63                | 11.44                 | -1.19                    | -4.58 | 6.89E-06 | 2.09E-04 | down CINSARC High vs. Low |
| <i>SERPINA1</i>     | serpin family A member 1      | 14q32.13       | 5265           | 11.24                | 10.11                 | -1.13                    | -4.60 | 6.21E-06 | 1.93E-04 | down CINSARC High vs. Low |
| <i>MAGI2</i>        | membrane associated gua       | 7q21.11        | 9863           | 8.11                 | 7.34                  | -0.77                    | -4.65 | 4.91E-06 | 1.60E-04 | down CINSARC High vs. Low |
| <i>ANKRD24</i>      | ankyrin repeat domain 24      | 19p13.3        | 170961         | 5.04                 | 4.28                  | -0.76                    | -4.67 | 4.53E-06 | 1.51E-04 | down CINSARC High vs. Low |
| <i>RAB30</i>        | RAB30, member RAS onco        | 11q14.1        | 27314          | 8.74                 | 7.93                  | -0.81                    | -4.72 | 3.68E-06 | 1.27E-04 | down CINSARC High vs. Low |
| <i>TENT5B</i>       | terminal nucleotidyltransfer  | 1p36.11        | 115572         | 7.97                 | 6.97                  | -1.00                    | -4.73 | 3.40E-06 | 1.20E-04 | down CINSARC High vs. Low |
| <i>SPEF1</i>        | sperm flagellar 1             | 20p13          | 25876          | 5.74                 | 4.90                  | -0.84                    | -4.76 | 3.05E-06 | 1.10E-04 | down CINSARC High vs. Low |
| <i>AZGP1</i>        | alpha-2-glycoprotein 1, zin   | 7q22.1         | 563            | 14.26                | 13.30                 | -0.96                    | -4.76 | 3.02E-06 | 1.10E-04 | down CINSARC High vs. Low |
| <i>BCAN</i>         | brevican                      | 1q23.1         | 63827          | 3.77                 | 2.82                  | -0.95                    | -4.86 | 1.89E-06 | 7.27E-05 | down CINSARC High vs. Low |
| <i>TSNAXIP1</i>     | translin associated factor X  | 16q22.1        | 55815          | 5.03                 | 4.32                  | -0.71                    | -4.93 | 1.35E-06 | 5.55E-05 | down CINSARC High vs. Low |
| <i>PRICKLE4</i>     | prickle planar cell polarit   | 6p21.1         | 29964          | 6.36                 | 5.60                  | -0.76                    | -5.00 | 1.00E-06 | 4.25E-05 | down CINSARC High vs. Low |
| <i>TNNC1</i>        | troponin C1, slow skeletal    | 3p21.1         | 7134           | 2.75                 | 1.94                  | -0.81                    | -5.12 | 5.53E-07 | 2.57E-05 | down CINSARC High vs. Low |
| <i>C2orf73</i>      | chromosome 2 open readi       | 2p16.2         | 129852         | 2.25                 | 1.52                  | -0.72                    | -5.13 | 5.30E-07 | 2.48E-05 | down CINSARC High vs. Low |
| <i>CFAP43</i>       | cilia and flagella associater | 10q25.1        | 80217          | 6.17                 | 5.29                  | -0.89                    | -5.18 | 4.17E-07 | 1.98E-05 | down CINSARC High vs. Low |
| <i>NUDT18</i>       | nudix hydrolase 18            | 8p21.3         | 79873          | 7.66                 | 7.07                  | -0.59                    | -5.21 | 3.59E-07 | 1.76E-05 | down CINSARC High vs. Low |
| <i>PEBP4</i>        | phosphatidylethanolamine      | 8p21.3         | 157310         | 2.83                 | 1.56                  | -1.27                    | -5.22 | 3.33E-07 | 1.64E-05 | down CINSARC High vs. Low |
| <i>RHBDL1</i>       | rhomboid like 1               | 16p13.3        | 9028           | 6.40                 | 5.40                  | -1.01                    | -5.23 | 3.18E-07 | 1.58E-05 | down CINSARC High vs. Low |
| <i>DUSP27</i>       | dual specificity phosphatas   | 1q24.1         | 92235          | 2.87                 | 2.00                  | -0.87                    | -5.24 | 3.00E-07 | 1.50E-05 | down CINSARC High vs. Low |
| <i>CCDC189</i>      | coiled-coil domain containi   | 16p11.2        | 90835          | 6.75                 | 6.05                  | -0.70                    | -5.32 | 2.02E-07 | 1.07E-05 | down CINSARC High vs. Low |
| <i>KIF13B</i>       | kinesin family member 13B     | 8p12           | 23303          | 10.79                | 10.05                 | -0.74                    | -5.33 | 1.96E-07 | 1.04E-05 | down CINSARC High vs. Low |
| <i>CX3CR1</i>       | C-X3-C motif chemokine re     | 3p22.2         | 1524           | 7.15                 | 6.21                  | -0.95                    | -5.34 | 1.87E-07 | 1.01E-05 | down CINSARC High vs. Low |
| <i>DNAAF1</i>       | dynein axonemal assembly      | 16q24.1        | 123872         | 5.56                 | 4.52                  | -1.04                    | -5.36 | 1.67E-07 | 9.06E-06 | down CINSARC High vs. Low |
| <i>CATSPERG</i>     | cation channel sperm asso     | 19q13.2        | 57828          | 5.15                 | 4.39                  | -0.76                    | -5.41 | 1.30E-07 | 7.30E-06 | down CINSARC High vs. Low |
| <i>NHLRC4</i>       | NHL repeat containing 4       | 16p13.3        | 283948         | 6.37                 | 5.31                  | -1.06                    | -5.42 | 1.24E-07 | 7.00E-06 | down CINSARC High vs. Low |
| <i>CASC1</i>        | cancer susceptibility 1       | 12p12.1        | 55259          | 5.95                 | 5.14                  | -0.81                    | -5.42 | 1.23E-07 | 6.96E-06 | down CINSARC High vs. Low |
| <i>RIBC1</i>        | RIB43A domain with coiled     | Xp11.22        | 158787         | 6.54                 | 5.86                  | -0.68                    | -5.67 | 3.44E-08 | 2.28E-06 | down CINSARC High vs. Low |
| <i>DRC3</i>         | dynein regulatory complex     | 17p11.2        | 83450          | 6.63                 | 5.75                  | -0.88                    | -5.68 | 3.28E-08 | 2.20E-06 | down CINSARC High vs. Low |
| <i>C3orf18</i>      | chromosome 3 open readi       | 3p21.31        | 51161          | 7.78                 | 7.06                  | -0.72                    | -5.81 | 1.57E-08 | 1.15E-06 | down CINSARC High vs. Low |
| <i>TTC12</i>        | tetratricopeptide repeat do   | 11q23.2        | 54970          | 8.40                 | 7.80                  | -0.60                    | -6.05 | 4.31E-09 | 3.66E-07 | down CINSARC High vs. Low |
| <i>TTC36</i>        | tetratricopeptide repeat do   | 11q23.3        | 143941         | 6.17                 | 4.87                  | -1.30                    | -6.06 | 4.04E-09 | 3.46E-07 | down CINSARC High vs. Low |
| <i>MORN1</i>        | MORN repeat containing 1      | 1p36.32        | 79906          | 6.71                 | 5.88                  | -0.82                    | -6.37 | 7.18E-10 | 7.46E-08 | down CINSARC High vs. Low |
| <i>C16orf71</i>     | chromosome 16 open read       | 16p13.3        | 146562         | 5.96                 | 5.05                  | -0.90                    | -7.19 | 5.37E-12 | 7.46E-10 | down CINSARC High vs. Low |
| <i>TMEM25</i>       | transmembrane protein 25      | 11q23.3        | 84866          | 10.38                | 9.71                  | -0.66                    | -7.50 | 7.61E-13 | 1.29E-10 | down CINSARC High vs. Low |

Supplementary Table 8: Ontologies of the 510 genes differentially expressed between the two CINSARC classes in Luminal B breast cancers.

| Terms ID | Terms                                                   | up CINSARC High vs. Low |                              |          |          | down CINSARC High vs. Low |      |         |         |
|----------|---------------------------------------------------------|-------------------------|------------------------------|----------|----------|---------------------------|------|---------|---------|
|          |                                                         | N                       | Gene                         | p-value  | q-value  | N                         | Gene | p-value | q-value |
| GO:00002 | mitotic cell cycle                                      | 42                      | <i>CENPA,BUB1,NCAF</i>       | 3.43E-21 | 2.02E-18 |                           |      |         |         |
| GO:00070 | mitotic nuclear division                                | 32                      | <i>BUB1,CCNA2,CCNE</i>       | 3.84E-20 | 1.13E-17 |                           |      |         |         |
| GO:00070 | chromosome segregation                                  | 14                      | <i>BUB1,HJURP,BIRC5</i>      | 9.02E-13 | 1.77E-10 |                           |      |         |         |
| GO:00000 | mitotic sister chromatid segregation                    | 8                       | <i>SPAG5,MAD2L1,NC</i>       | 1.81E-10 | 2.66E-08 |                           |      |         |         |
| GO:00070 | mitotic spindle assembly checkpoint                     | 8                       | <i>BUB1,TTK,BUB1B,C</i>      | 6.20E-09 | 7.29E-07 |                           |      |         |         |
| GO:00002 | mitotic cytokinesis                                     | 6                       | <i>CEP55,KIF23,KIF20</i>     | 2.07E-07 | 1.69E-05 |                           |      |         |         |
| GO:00070 | microtubule depolymerization                            | 4                       | <i>KIF14,KIF2C,KIF18E</i>    | 2.16E-07 | 1.69E-05 |                           |      |         |         |
| GO:00009 | cytokinesis                                             | 8                       | <i>BIRC5,KIF23,PRC1</i>      | 2.30E-07 | 1.69E-05 |                           |      |         |         |
| GO:00070 | microtubule-based movement                              | 9                       | <i>KIF14,KIF23,CENPE</i>     | 3.07E-07 | 2.01E-05 |                           |      |         |         |
| GO:00072 | small GTPase mediated signal transduction               | 29                      | <i>CENPA,BUB1,BIRC5</i>      | 5.78E-07 | 3.40E-05 |                           |      |         |         |
| GO:00000 | G2/M transition of mitotic cell cycle                   | 12                      | <i>CCNA2,CCNB2,BIRC5</i>     | 1.49E-06 | 7.98E-05 |                           |      |         |         |
| GO:00000 | regulation of transcription involved in cell cycle      | 5                       | <i>RRM2,CDK1,ORC1</i>        | 1.88E-06 | 9.23E-05 |                           |      |         |         |
| GO:00070 | mitotic metaphase plate congression                     | 6                       | <i>CEP55,KIF14,CENF</i>      | 3.03E-06 | 1.37E-04 |                           |      |         |         |
| GO:00070 | spindle organization                                    | 4                       | <i>TTK,SPAG5,ASPM,PLK1</i>   | 4.71E-06 | 1.98E-04 |                           |      |         |         |
| GO:00000 | regulation of cyclin-dependent protein kinase activity  | 6                       | <i>CCNA2,BLM,CDKN1A</i>      | 5.33E-06 | 2.01E-04 |                           |      |         |         |
| GO:00062 | DNA replication initiation                              | 5                       | <i>MCM10,ORC1,CCN</i>        | 5.47E-06 | 2.01E-04 |                           |      |         |         |
| GO:00070 | mitotic spindle organization                            | 5                       | <i>TTK,AURKA,NDC80</i>       | 1.08E-05 | 3.73E-04 |                           |      |         |         |
| GO:00903 | mitotic spindle assembly                                | 5                       | <i>BIRC5,TPX2,KIF11,PLK1</i> | 2.37E-05 | 7.33E-04 |                           |      |         |         |
| GO:00103 | regulation of G2/M transition of mitotic cell cycle     | 3                       | <i>KIF14,CENPF,PKIA</i>      | 3.06E-05 | 8.99E-04 |                           |      |         |         |
| GO:00062 | DNA replication                                         | 10                      | <i>TICRR,BLM,MCM10</i>       | 3.78E-05 | 1.06E-03 |                           |      |         |         |
| GO:00310 | endocrine pancreas development                          | 5                       | <i>ONECUT2,HNF4G,FOXP2</i>   | 4.68E-05 | 1.25E-03 |                           |      |         |         |
| GO:00074 | peripheral nervous system development                   | 4                       | <i>GFRA3,UGT8,SCN8A</i>      | 5.84E-05 | 1.49E-03 |                           |      |         |         |
| GO:00070 | mitotic G2 DNA damage checkpoint                        | 3                       | <i>CCNA2,BLM,CDK1</i>        | 6.44E-05 | 1.58E-03 |                           |      |         |         |
| GO:00000 | G1/S transition of mitotic cell cycle                   | 10                      | <i>MCM10,RRM2,CDK</i>        | 9.74E-05 | 2.29E-03 |                           |      |         |         |
| GO:00068 | ion transport                                           | 10                      | <i>CHRNA5,SLC7A5,S</i>       | 1.23E-04 | 2.78E-03 |                           |      |         |         |
| GO:00311 | mRNA 3-end processing                                   | 220                     | <i>CENPA,BUB1,NCAF</i>       | 1.63E-04 | 3.56E-03 |                           |      |         |         |
| GO:00070 | mitotic cell cycle checkpoint                           | 4                       | <i>BUB1,TTK,BUB1B,PLK1</i>   | 1.79E-04 | 3.76E-03 |                           |      |         |         |
| GO:00198 | antigen processing and presentation of peptide antigens | 7                       | <i>KIF23,CENPE,KIF20A</i>    | 2.16E-04 | 4.37E-03 |                           |      |         |         |
| GO:00901 | positive regulation of branching morphogenesis          | 3                       | <i>LHX1,SIX1,PAX2</i>        | 3.21E-04 | 6.28E-03 |                           |      |         |         |
| GO:00082 | cell proliferation                                      | 15                      | <i>BUB1,BUB1B,KIF2C</i>      | 5.42E-04 | 1.03E-02 |                           |      |         |         |
| GO:00016 | urogenital system development                           | 2                       | <i>LHX1,PAX2</i>             | 6.28E-04 | 1.12E-02 |                           |      |         |         |
| GO:00158 | neutral amino acid transport                            | 2                       | <i>SLC7A5,SLC6A15</i>        | 6.28E-04 | 1.12E-02 |                           |      |         |         |
| GO:00082 | positive regulation of cell proliferation               | 17                      | <i>BIRC5,KIF14,FOXM1</i>     | 6.68E-04 | 1.12E-02 |                           |      |         |         |
| GO:00063 | double-strand break repair                              | 8                       | <i>KPNA2,BLM,TRIP13</i>      | 7.55E-04 | 1.23E-02 |                           |      |         |         |
| GO:00025 | chronic inflammatory response                           | 2                       | <i>CAMP,S100A8</i>           | 8.53E-04 | 1.29E-02 |                           |      |         |         |
| GO:00063 | mitotic recombination                                   | 2                       | <i>TOP2A,RAD54B</i>          | 8.53E-04 | 1.29E-02 |                           |      |         |         |
| GO:00310 | response to caffeine                                    | 2                       | <i>DNMT3B,IL6</i>            | 8.53E-04 | 1.29E-02 |                           |      |         |         |
| GO:00063 | nucleosome assembly                                     | 6                       | <i>CENPA,HJURP,CEI</i>       | 9.70E-04 | 1.43E-02 |                           |      |         |         |
| GO:00073 | nervous system development                              | 12                      | <i>GFRA3,SLC7A5,SCN</i>      | 1.06E-03 | 1.43E-02 |                           |      |         |         |
| GO:00017 | organ induction                                         | 2                       | <i>SIX1,HOXC11</i>           | 1.12E-03 | 1.43E-02 |                           |      |         |         |
| GO:00070 | mitotic chromosome condensation                         | 2                       | <i>NCAPH,NCAPG</i>           | 1.12E-03 | 1.43E-02 |                           |      |         |         |
| GO:00164 | somatic hypermutation of immunoglobulin genes           | 2                       | <i>POLQ,EXO1</i>             | 1.12E-03 | 1.43E-02 |                           |      |         |         |
| GO:00218 | layer formation in cerebral cortex                      | 2                       | <i>LRP8,CDK5R2</i>           | 1.12E-03 | 1.43E-02 |                           |      |         |         |
| GO:00218 | cell proliferation in forebrain                         | 2                       | <i>KIF14,ARX</i>             | 1.12E-03 | 1.43E-02 |                           |      |         |         |
| GO:19035 | regulation of nucleic acid-templated transcription      | 3                       | <i>TRIP13,SAMD11,AC</i>      | 1.30E-03 | 1.62E-02 |                           |      |         |         |
| GO:00100 | glial cell differentiation                              | 2                       | <i>NFIB,PAX2</i>             | 1.44E-03 | 1.73E-02 |                           |      |         |         |
| GO:00165 | protein autophosphorylation                             | 2                       | <i>CTSV,PCSK2</i>            | 1.44E-03 | 1.73E-02 |                           |      |         |         |
| GO:00714 | cellular response to ionizing radiation                 | 3                       | <i>BLM,ECT2,RAD51A</i>       | 1.49E-03 | 1.75E-02 |                           |      |         |         |
| GO:00018 | response to yeast                                       | 2                       | <i>CAMP,IL6</i>              | 1.81E-03 | 2.00E-02 |                           |      |         |         |
| GO:00022 | innate immune response in mucosa                        | 2                       | <i>CAMP,BPIFB1</i>           | 1.81E-03 | 2.00E-02 |                           |      |         |         |
| GO:00105 | regulation of double-strand break repair                | 2                       | <i>RAD51AP1,FIGN</i>         | 1.81E-03 | 2.00E-02 |                           |      |         |         |
| GO:00068 | neurotransmitter transport                              | 3                       | <i>SLC6A15,SLC6A11</i>       | 1.94E-03 | 2.07E-02 |                           |      |         |         |
| GO:00071 | cell communication                                      | 3                       | <i>CCL18,FRAS1,GJB3</i>      | 1.94E-03 | 2.07E-02 |                           |      |         |         |
| GO:00066 | leukotriene metabolic process                           | 2                       | <i>CYP4F3,ALOX15</i>         | 2.23E-03 | 2.27E-02 |                           |      |         |         |
| GO:19043 | positive regulation of telomere capping                 | 2                       | <i>NEK2,AURKB</i>            | 2.23E-03 | 2.27E-02 |                           |      |         |         |
| GO:00062 | DNA repair                                              | 14                      | <i>FOXM1,KPNA2,PAF</i>       | 2.24E-03 | 2.27E-02 |                           |      |         |         |
| GO:00068 | amino acid transport                                    | 3                       | <i>SLC7A5,SLC6A15,S</i>      | 2.48E-03 | 2.35E-02 |                           |      |         |         |
| GO:00100 | response to organic substance                           | 3                       | <i>SQLE,AQP9,TRPA1</i>       | 2.48E-03 | 2.35E-02 |                           |      |         |         |
| GO:20012 | positive regulation of intrinsic apoptosis              | 3                       | <i>BUB1,IL19,S100A8</i>      | 2.48E-03 | 2.35E-02 |                           |      |         |         |
| GO:00068 | regulation of pH                                        | 2                       | <i>SLC9A2,ATP6V0A4</i>       | 2.71E-03 | 2.53E-02 |                           |      |         |         |
| GO:00009 | cell separation after cytokinesis                       | 2                       | <i>CEP55,KIF20A</i>          | 3.24E-03 | 2.85E-02 |                           |      |         |         |
| GO:00015 | oocyte maturation                                       | 2                       | <i>TRIP13,EREG</i>           | 3.24E-03 | 2.85E-02 |                           |      |         |         |
| GO:00020 | morphogenesis of an epithelium                          | 2                       | <i>SERPINB5,FRAS1</i>        | 3.24E-03 | 2.85E-02 |                           |      |         |         |
| GO:19038 | positive regulation of dendrite extension               | 2                       | <i>RIMS1,RASAL1</i>          | 3.24E-03 | 2.85E-02 |                           |      |         |         |
| GO:00026 | positive regulation of leukocyte chemotaxis             | 2                       | <i>IL6,CXCL9</i>             | 3.84E-03 | 3.27E-02 |                           |      |         |         |
| GO:00099 | anterior/posterior axis specification                   | 2                       | <i>AURKA,LHX1</i>            | 3.84E-03 | 3.27E-02 |                           |      |         |         |
| GO:00062 | DNA-dependent DNA replication                           | 2                       | <i>POLQ,ORC6</i>             | 4.50E-03 | 3.78E-02 |                           |      |         |         |
| GO:00020 | sprouting angiogenesis                                  | 2                       | <i>E2F8,E2F7</i>             | 5.23E-03 | 4.21E-02 |                           |      |         |         |
| GO:00901 | cochlea development                                     | 2                       | <i>PAX2,KCNK3</i>            | 5.23E-03 | 4.21E-02 |                           |      |         |         |
| GO:00025 | monocyte chemotaxis                                     | 3                       | <i>CCL18,IL6,CCL21</i>       | 5.62E-03 | 4.47E-02 |                           |      |         |         |
| GO:00001 | establishment of mitotic spindle orientation            | 2                       | <i>CENPA,NDC80</i>           | 6.02E-03 | 4.59E-02 |                           |      |         |         |
| GO:00072 | gamma-aminobutyric acid signaling pathway               | 2                       | <i>GABBR2,GABRA3</i>         | 6.02E-03 | 4.59E-02 |                           |      |         |         |
| GO:00901 | cochlea morphogenesis                                   | 2                       | <i>SIX1,PAX2</i>             | 6.02E-03 | 4.59E-02 |                           |      |         |         |
| GO:00713 | cellular response to interleukin-1                      | 4                       | <i>CAMP,CCL18,IL6,C</i>      | 6.23E-03 | 4.69E-02 |                           |      |         |         |
| GO:00070 | mitotic nuclear envelope disassembly                    | 3                       | <i>CCNB2,CDK1,PLK1</i>       | 6.70E-03 | 4.87E-02 |                           |      |         |         |
| GO:00308 | positive regulation of actin filament polymerization    | 3                       | <i>PFN2,CCL21,ALOX</i>       | 6.70E-03 | 4.87E-02 |                           |      |         |         |
| GO:00075 | sex differentiation                                     | 2                       | <i>CENPI,DMRTA1</i>          | 6.87E-03 | 4.87E-02 |                           |      |         |         |
| GO:00108 | retina layer formation                                  | 2                       | <i>SDK2,LHX1</i>             | 6.87E-03 | 4.87E-02 |                           |      |         |         |
| GO:00715 | cellular response to dexamethasone                      | 2                       | <i>DNMT3B,IL6</i>            | 6.87E-03 | 4.87E-02 |                           |      |         |         |
| GO:00063 | DNA recombination                                       | 4                       | <i>BLM,PIF1,EXO1,MN</i>      | 7.07E-03 | 4.95E-02 |                           |      |         |         |
| GO:00016 | branching involved in ureteric bud morphogenesis        | 3                       | <i>LHX1,SIX1,PAX2</i>        | 7.28E-03 | 0.050    |                           |      |         |         |
| GO:00007 | double-strand break repair via homologous recombination | 6                       | <i>BLM,POLQ,RAD51A</i>       | 7.77E-03 | 0.052    |                           |      |         |         |
| GO:00018 | positive regulation of cytokine production              | 2                       | <i>EREG,LEP</i>              | 7.80E-03 | 0.052    |                           |      |         |         |
| GO:00713 | cellular response to epidermal growth factor            | 2                       | <i>GAREM,PAX2</i>            | 7.80E-03 | 0.052    |                           |      |         |         |
| GO:00015 | microtubule bundle formation                            | 2                       | <i>KIF20A,PLK1</i>           | 8.80E-03 | 0.057    |                           |      |         |         |

| Terms ID | Terms                                     | up CINSARC High vs. Low |                         |          |          | down CINSARC High vs. Low |                         |          |          |
|----------|-------------------------------------------|-------------------------|-------------------------|----------|----------|---------------------------|-------------------------|----------|----------|
|          |                                           | N                       | Gene                    | p-value  | q-value  | N                         | Gene                    | p-value  | q-value  |
| GO:00017 | neuron migration                          | 5                       | <i>ASPM,GFRA3,FGF1</i>  | 9.79E-03 | 0.061    |                           |                         |          |          |
| GO:00109 | negative regulation of phosphatase ac     | 3                       | <i>CASC5,PCDH11X,E</i>  | 9.95E-03 | 0.061    |                           |                         |          |          |
| GO:00002 | microtubule cytoskeleton organization     | 4                       | <i>BIRC5,PRC1,CDK1</i>  | 1.07E-02 | 0.061    |                           |                         |          |          |
| GO:00071 | heterophilic cell-cell adhesion via plasm | 3                       | <i>TENM2,L1CAM,CBL</i>  | 1.07E-02 | 0.061    |                           |                         |          |          |
| GO:00986 | anion transmembrane transport             | 3                       | <i>SLC4A8,SLC04C1,</i>  | 1.07E-02 | 0.061    |                           |                         |          |          |
| GO:00062 | DNA metabolic process                     | 2                       | <i>KPNA2,MKI67</i>      | 1.10E-02 | 0.061    |                           |                         |          |          |
| GO:00073 | pattern specification process             | 2                       | <i>LHX1,SIX1</i>        | 1.10E-02 | 0.061    |                           |                         |          |          |
| GO:00099 | proximal/distal pattern formation         | 2                       | <i>HOXC10,HOXC11</i>    | 1.10E-02 | 0.061    |                           |                         |          |          |
| GO:00709 | protein K11-linked ubiquitination         | 2                       | <i>UBE2C,UBE2T</i>      | 1.22E-02 | 0.061    |                           |                         |          |          |
| GO:00015 | retinoid metabolic process                | 3                       | <i>LRP8,GPC2,LRAT</i>   | 1.32E-02 | 0.061    |                           |                         |          |          |
| GO:00197 | antibacterial humoral response            | 2                       | <i>CAMP,IGJ</i>         | 1.35E-02 | 0.062    |                           |                         |          |          |
| GO:00072 | spermatogenesis                           | 11                      | <i>TRIP13,ASPM,DIAP</i> | 1.37E-02 | 0.062    |                           |                         |          |          |
| GO:00301 | cell differentiation                      | 13                      | <i>FOXM1,CENPF,CB</i>   | 1.47E-02 | 0.063    |                           |                         |          |          |
| GO:00033 | amino acid transmembrane transport        | 2                       | <i>SLC7A5,SLC6A14</i>   | 1.49E-02 | 0.063    |                           |                         |          |          |
| GO:00071 | reciprocal meiotic recombination          | 2                       | <i>TRIP13,RAD54B</i>    | 1.49E-02 | 0.063    |                           |                         |          |          |
| GO:00215 | cerebellum development                    | 2                       | <i>LHX1,CDK5R2</i>      | 1.49E-02 | 0.063    |                           |                         |          |          |
| GO:00718 | DNA biosynthetic process                  | 2                       | <i>CENPF,POLQ</i>       | 1.49E-02 | 0.063    |                           |                         |          |          |
| GO:00096 | response to toxic substance               | 4                       | <i>DNMT3B,SCN8A,TT</i>  | 1.53E-02 | 0.063    |                           |                         |          |          |
| GO:00076 | phototransduction, visible light          | 4                       | <i>LRP8,CNGA2,GPC2</i>  | 1.69E-02 | 0.066    |                           |                         |          |          |
| GO:00193 | arachidonic acid metabolic process        | 3                       | <i>CYP2J2,CYP4F3,AL</i> | 1.70E-02 | 0.066    |                           |                         |          |          |
| GO:00080 | regulation of heart contraction           | 2                       | <i>CYP2J2,TNNT2</i>     | 1.78E-02 | 0.066    |                           |                         |          |          |
| GO:00159 | ATP hydrolysis coupled proton transp      | 2                       | <i>ATP1A3,ATP6V0A4</i>  | 1.78E-02 | 0.066    |                           |                         |          |          |
| GO:00300 | insulin secretion                         | 2                       | <i>FAM3B,LEP</i>        | 1.94E-02 | 0.067    |                           |                         |          |          |
| GO:00071 | homophilic cell adhesion via plasma m     | 6                       | <i>SDK2,DSG2,L1CAM</i>  | 2.01E-02 | 0.067    |                           |                         |          |          |
| GO:00311 | organ regeneration                        | 3                       | <i>CCNA2,MKI67,CCN</i>  | 2.03E-02 | 0.067    |                           |                         |          |          |
| GO:00071 | negative regulation of cell adhesion      | 2                       | <i>PDE3B,ADAMDEC1</i>   | 2.28E-02 | 0.069    |                           |                         |          |          |
| GO:00713 | cellular response to tumor necrosis fac   | 4                       | <i>CAMP,CCL18,IL6,C</i> | 2.41E-02 | 0.071    |                           |                         |          |          |
| GO:00068 | water transport                           | 2                       | <i>ADCY5,AQP9</i>       | 2.46E-02 | 0.071    |                           |                         |          |          |
| GO:00906 | activation of GTPase activity             | 2                       | <i>ECT2,CCL21</i>       | 2.46E-02 | 0.071    |                           |                         |          |          |
| GO:00076 | sensory perception of sound               | 5                       | <i>SCN8A,GJB3,COCH</i>  | 2.55E-02 | 0.071    |                           |                         |          |          |
| GO:00075 | excretion                                 | 2                       | <i>AQP9,ATP6V0A4</i>    | 2.65E-02 | 0.072    |                           |                         |          |          |
| GO:00094 | response to cold                          | 2                       | <i>IL6,TRPA1</i>        | 2.65E-02 | 0.072    |                           |                         |          |          |
| GO:00100 | response to zinc ion                      | 2                       | <i>GGH,S100A8</i>       | 2.65E-02 | 0.072    |                           |                         |          |          |
| GO:00157 | bicarbonate transport                     | 2                       | <i>SLC4A8,SLC4A10</i>   | 2.65E-02 | 0.072    |                           |                         |          |          |
| GO:00063 | transcription from RNA polymerase II p    | 15                      | <i>FOXM1,TRIP13,PTI</i> | 2.89E-02 | 0.074    |                           |                         |          |          |
| GO:00016 | ureteric bud development                  | 2                       | <i>LHX1,SIX1</i>        | 3.05E-02 | 0.077    |                           |                         |          |          |
| GO:00903 | phagosome maturation                      | 2                       | <i>CAMP,ATP6V0A4</i>    | 3.05E-02 | 0.077    |                           |                         |          |          |
| GO:00075 | blood coagulation                         | 13                      | <i>KIF23,CENPE,KIF2</i> | 3.25E-02 | 0.080    |                           |                         |          |          |
| GO:00713 | cellular response to retinoic acid        | 3                       | <i>PAX2,BRINP3,LEP</i>  | 3.40E-02 | 0.083    |                           |                         |          |          |
| GO:00022 | hematopoietic progenitor cell differenti  | 3                       | <i>TOP2A,ANLN,PTPR</i>  | 3.89E-02 | 0.091    |                           |                         |          |          |
| GO:00064 | protein phosphorylation                   | 14                      | <i>BUB1,BIRC5,TTK,B</i> | 3.91E-02 | 0.091    |                           |                         |          |          |
| GO:00303 | embryonic limb morphogenesis              | 2                       | <i>FRAS1,HOXC10</i>     | 3.94E-02 | 0.091    |                           |                         |          |          |
| GO:00073 | regulation of mitotic cell cycle          | 3                       | <i>BIRC5,PLK1,RPRM</i>  | 4.06E-02 | 0.091    |                           |                         |          |          |
| GO:00001 | negative regulation of transcription fro  | 18                      | <i>FOXM1,PLK1,AURK</i>  | 4.08E-02 | 0.091    |                           |                         |          |          |
| GO:00068 | sodium ion transport                      | 3                       | <i>SCN8A,ATP1A3,SL</i>  | 4.42E-02 | 0.098    |                           |                         |          |          |
| GO:00140 | response to organic cyclic compound       | 2                       | <i>MKI67,TRPA1</i>      | 4.69E-02 | 0.101    |                           |                         |          |          |
| GO:00160 | lipid catabolic process                   | 3                       | <i>PLCB4,PLCH1,PLA</i>  | 4.80E-02 | 0.102    |                           |                         |          |          |
| GO:00018 | placenta development                      | 5                       | <i>E2F8,E2F7,DLX3,G</i> | 1.97E-05 | 6.42E-04 | 2                         | <i>CITED1,NDP</i>       | 4.45E-03 | 4.21E-02 |
| GO:00162 | O-glycan processing                       | 5                       | <i>MUC13,ST6GALNA</i>   | 6.51E-04 | 1.12E-02 | 2                         | <i>MUC1,GALNT5</i>      | 2.38E-02 | 0.067    |
| GO:00725 | reactive oxygen species metabolic pro     | 3                       | <i>IL19,AOX1,PAX2</i>   | 2.48E-03 | 2.35E-02 | 2                         | <i>MPV17L,EPHX2</i>     | 4.45E-03 | 4.21E-02 |
| GO:00072 | cell-cell signaling                       | 8                       | <i>AREG,FGF13,CCL1</i>  | 2.09E-02 | 0.067    | 5                         | <i>NDP,CARTPT,GJA1</i>  | 3.11E-02 | 0.080    |
| GO:00217 | hippocampus development                   | 3                       | <i>KIF14,FGF13,CDK5</i> | 1.15E-02 | 0.061    | 2                         | <i>DLX2,BCAN</i>        | 1.45E-02 | 0.053    |
| GO:00064 | protein O-linked glycosylation            | 4                       | <i>MUC13,GALNT3,B3</i>  | 1.32E-02 | 0.061    | 3                         | <i>MUC1,GALNT5,ADA</i>  | 9.03E-03 | 4.21E-02 |
| GO:00074 | axonogenesis                              | 4                       | <i>SLITRK5,PTPRZ1,P</i> | 1.77E-02 | 0.066    | 3                         | <i>SPTBN4,ADCY1,CA</i>  | 1.16E-02 | 4.86E-02 |
| GO:00065 | cellular amino acid metabolic process     | 2                       | <i>SLC7A5,SLC6A14</i>   | 2.11E-02 | 0.067    | 2                         | <i>SLC7A2,SLC7A4</i>    | 4.86E-03 | 4.21E-02 |
| GO:00076 | adult walking behavior                    | 2                       | <i>SCN8A,EFNB3</i>      | 2.11E-02 | 0.067    | 2                         | <i>KLHL1,SPTBN4</i>     | 4.86E-03 | 4.21E-02 |
| GO:00900 | establishment of protein localization to  | 2                       | <i>TSPAN5,ACTN2</i>     | 1.94E-02 | 0.067    | 2                         | <i>SPTBN4,TSPAN10</i>   | 4.45E-03 | 4.21E-02 |
| GO:00300 | muscle filament sliding                   | 3                       | <i>TNNI1,TNNT2,ACT</i>  | 4.67E-03 | 3.87E-02 | 3                         | <i>TNNI3,MYBPC1,TNI</i> | 6.45E-04 | 4.21E-02 |
| GO:00072 | synaptic transmission                     | 12                      | <i>GABBR2,CHRNA5,S</i>  | 2.65E-02 | 0.072    | 10                        | <i>GRIA2,CARTPT,P2I</i> | 2.95E-03 | 4.21E-02 |
| GO:00085 | epidermis development                     |                         |                         |          |          | 2                         | <i>KRT15,CDSN</i>       | 4.98E-02 | 0.099    |
| GO:00025 | platelet degranulation                    |                         |                         |          |          | 2                         | <i>CLU,SERPINA1</i>     | 4.53E-02 | 0.094    |
| GO:00074 | brain development                         |                         |                         |          |          | 4                         | <i>CITED1,DLX2,C11o</i> | 4.50E-02 | 0.094    |
| GO:00065 | proteolysis                               |                         |                         |          |          | 8                         | <i>WFDC2,TPSG1,CFI</i>  | 4.30E-02 | 0.092    |
| GO:00071 | cell adhesion                             |                         |                         |          |          | 8                         | <i>COL4A6,CDSN,MYE</i>  | 3.95E-02 | 0.088    |
| GO:00986 | cation transmembrane transport            |                         |                         |          |          | 2                         | <i>TMEM63C,CHRNA2</i>   | 3.43E-02 | 0.083    |
| GO:00074 | central nervous system development        |                         |                         |          |          | 3                         | <i>CHST8,ZBTB16,BC</i>  | 2.91E-02 | 0.076    |
| GO:00072 | neurotransmitter secretion                |                         |                         |          |          | 2                         | <i>GAD1,ABAT</i>        | 2.71E-02 | 0.073    |
| GO:00718 | potassium ion transmembrane transp        |                         |                         |          |          | 3                         | <i>KCNE4,HPN,KCNQ</i>   | 2.29E-02 | 0.066    |
| GO:00015 | vasculogenesis                            |                         |                         |          |          | 2                         | <i>TNNI3,CITED1</i>     | 2.28E-02 | 0.066    |
| GO:00165 | negative regulation of angiogenesis       |                         |                         |          |          | 2                         | <i>BAI2,CX3CR1</i>      | 1.89E-02 | 0.060    |
| GO:00160 | synaptic vesicle exocytosis               |                         |                         |          |          | 2                         | <i>SYT13,SYT12</i>      | 1.62E-02 | 0.056    |
| GO:00072 | phospholipase C-activating G-protein      |                         |                         |          |          | 2                         | <i>AGTR1,P2RY11</i>     | 1.54E-02 | 0.053    |
| GO:00303 | sperm motility                            |                         |                         |          |          | 2                         | <i>ATP1A4,TEKT3</i>     | 1.54E-02 | 0.053    |
| GO:00067 | glutathione metabolic process             |                         |                         |          |          | 2                         | <i>CLIC6,GSTM2</i>      | 1.38E-02 | 0.051    |
| GO:00069 | vesicle fusion                            |                         |                         |          |          | 2                         | <i>SYT13,SYT12</i>      | 1.38E-02 | 0.051    |
| GO:00303 | negative regulation of cell migration     |                         |                         |          |          | 3                         | <i>CHRD,MAGI2,CX3C</i>  | 1.31E-02 | 0.050    |
| GO:00300 | actin cytoskeleton organization           |                         |                         |          |          | 4                         | <i>KLHL1,FGD3,ABLI</i>  | 1.22E-02 | 4.95E-02 |
| GO:00071 | adenylate cyclase-activating G-protein    |                         |                         |          |          | 2                         | <i>P2RY11,ADCY1</i>     | 1.09E-02 | 4.70E-02 |
| GO:00068 | potassium ion transport                   |                         |                         |          |          | 3                         | <i>ATP1A4,KCND3,KC</i>  | 1.03E-02 | 4.57E-02 |
| GO:00305 | negative regulation of BMP signaling p    |                         |                         |          |          | 2                         | <i>CHRD,TPRSS6</i>      | 8.94E-03 | 4.21E-02 |
| GO:00095 | fertilization                             |                         |                         |          |          | 2                         | <i>ATP1A4,SPTBN4</i>    | 8.35E-03 | 4.21E-02 |
| GO:00068 | xenobiotic metabolic process              |                         |                         |          |          | 5                         | <i>CYP2A7,NAT1,ACS</i>  | 8.27E-03 | 4.21E-02 |
| GO:00076 | visual perception                         |                         |                         |          |          | 5                         | <i>NDP,MYO3B,NXNL</i>   | 8.27E-03 | 4.21E-02 |
| GO:00097 | embryo development                        |                         |                         |          |          | 2                         | <i>FOXI1,RAI2</i>       | 6.72E-03 | 4.21E-02 |
| GO:20012 | negative regulation of extrinsic apopto   |                         |                         |          |          | 2                         | <i>FGF10,CX3CR1</i>     | 5.29E-03 | 4.21E-02 |
| GO:00171 | regulation of calcium ion-dependent ex    |                         |                         |          |          | 2                         | <i>SYT13,SYT12</i>      | 4.86E-03 | 4.21E-02 |
| GO:00164 | protein processing                        |                         |                         |          |          | 3                         | <i>RHBDL3,ADAMTS1</i>   | 4.50E-03 | 4.21E-02 |



| Terms ID | Terms                                    | up CINSARC High vs. Low |      |         |         | down CINSARC High vs. Low |                         |          |          |
|----------|------------------------------------------|-------------------------|------|---------|---------|---------------------------|-------------------------|----------|----------|
|          |                                          | N                       | Gene | p-value | q-value | N                         | Gene                    | p-value  | q-value  |
| GO:00016 | metanephros development                  |                         |      |         |         | 2                         | <i>CITED1,FGF10</i>     | 3.70E-03 | 4.21E-02 |
| GO:00018 | retina homeostasis                       |                         |      |         |         | 2                         | <i>PIP,AZGP1</i>        | 3.70E-03 | 4.21E-02 |
| GO:00068 | transport                                |                         |      |         |         | 9                         | <i>SLC7A2,SLC25A48,</i> | 3.70E-03 | 4.21E-02 |
| GO:00068 | cellular calcium ion homeostasis         |                         |      |         |         | 4                         | <i>TNNI3,STC2,EPHX2</i> | 3.06E-03 | 4.21E-02 |
| GO:00076 | long-term memory                         |                         |      |         |         | 2                         | <i>ADCY1,GRIA1</i>      | 2.73E-03 | 4.21E-02 |
| GO:00069 | complement activation                    |                         |      |         |         | 2                         | <i>CFB,CLU</i>          | 2.44E-03 | 4.21E-02 |
| GO:00723 | intrinsic apoptotic signaling pathway by |                         |      |         |         | 2                         | <i>ZNF385D,ZNF385B</i>  | 2.44E-03 | 4.21E-02 |
| GO:00109 | negative regulation of endopeptidase a   |                         |      |         |         | 5                         | <i>CST9,WFDC2,CST6</i>  | 1.57E-03 | 4.21E-02 |
| GO:00015 | detection of chemical stimulus involve   |                         |      |         |         | 2                         | <i>PIP,AZGP1</i>        | 1.49E-03 | 4.21E-02 |
| GO:00033 | cilium movement                          |                         |      |         |         | 2                         | <i>CFAP221,DNAAF1</i>   | 1.49E-03 | 4.21E-02 |
| GO:00098 | embryonic pattern specification          |                         |      |         |         | 2                         | <i>FGF10,ZBTB16</i>     | 1.49E-03 | 4.21E-02 |
| GO:00197 | calcium-mediated signaling               |                         |      |         |         | 3                         | <i>AGTR1,P2RY11,LAU</i> | 1.13E-03 | 4.21E-02 |
| GO:00193 | epoxygenase P450 pathway                 |                         |      |         |         | 2                         | <i>CYP2A7,EPHX2</i>     | 9.61E-04 | 4.21E-02 |
| GO:00069 | acute-phase response                     |                         |      |         |         | 3                         | <i>ORM1,ORM2,SERP</i>   | 2.91E-04 | 3.23E-02 |
| GO:00216 | cerebellar Purkinje cell layer developm  |                         |      |         |         | 2                         | <i>SEZ6L,KLHL1</i>      | 2.30E-04 | 3.23E-02 |
| GO:00018 | mesonephros development                  |                         |      |         |         | 2                         | <i>FGF10,ZBTB16</i>     | 1.74E-04 | 3.23E-02 |

**Supplementary Table 9: Comparison of expression levels of 226 proteins/phosphoproteins between the two CINSARC classes in Luminal B TCGA breast cancers.**

| Gene#Prot                     | N   | CINSARC, High- vs. Low-risk |          |          |
|-------------------------------|-----|-----------------------------|----------|----------|
|                               |     | Odds ratio [95%CI]          | p-value  | q-value  |
| CCNB1#Cyclin_B1               | 240 | 1.66 [1.41-1.96]            | 6.53E-07 | 1.46E-04 |
| FASN#FASN                     | 240 | 1.41 [1.09-1.83]            | 2.85E-02 | 0.227    |
| MSH6#MSH6                     | 240 | 1.32 [1.19-1.47]            | 1.38E-05 | 1.03E-03 |
| FOXO1#FoxO1                   | 240 | 1.31 [1.20-1.44]            | 2.31E-06 | 2.58E-04 |
| RPS6KB1#p70S6K                | 240 | 1.28 [1.11-1.47]            | 3.86E-03 | 0.086    |
| EIF4EBP1#4E-BP1               | 240 | 1.26 [1.08-1.46]            | 1.22E-02 | 0.143    |
| SYK#Syk                       | 240 | 1.26 [1.10-1.44]            | 4.65E-03 | 0.093    |
| ACACA#ACC1                    | 240 | 1.24 [1.03-1.49]            | 0.0548   | 0.313    |
| SLC1A5#SLC1A5                 | 218 | 1.24 [1.07-1.43]            | 1.52E-02 | 0.161    |
| ENY2#ENY2                     | 218 | 1.23 [1.10-1.37]            | 2.46E-03 | 0.063    |
| TSC1#TSC1                     | 240 | 1.23 [1.08-1.40]            | 9.29E-03 | 0.117    |
| ACACA ACACB#ACC_pS79          | 240 | 1.21 [1.02-1.44]            | 0.0717   | 0.385    |
| GAPDH#GAPDH                   | 240 | 1.21 [0.99-1.49]            | 0.12     | 0.532    |
| TFRC#TFRC                     | 240 | 1.21 [1.04-1.40]            | 3.88E-02 | 0.277    |
| YWHAZ#14-3-3_zeta             | 240 | 1.20 [1.09-1.33]            | 2.21E-03 | 0.063    |
| ASNS#ASNS                     | 240 | 1.20 [1.08-1.33]            | 5.48E-03 | 0.093    |
| CASP7#Caspase-7_cleavedD198   | 240 | 1.20 [1.03-1.39]            | 4.68E-02 | 0.291    |
| RBM15#RBM15                   | 240 | 1.20 [1.03-1.40]            | 4.80E-02 | 0.291    |
| NKX2-1#TTF1                   | 22  | 1.20 [0.76-1.91]            | 0.514    | 0.811    |
| TUBA1B#Acetyl-a-Tubulin-Lys40 | 240 | 1.19 [0.96-1.46]            | 0.178    | 0.584    |
| KAT2A#GCN5L2                  | 218 | 1.19 [1.07-1.32]            | 6.22E-03 | 0.093    |
| SCD#SCD                       | 240 | 1.18 [0.94-1.49]            | 0.234    | 0.643    |
| MYH11#MYH11                   | 240 | 1.17 [0.83-1.65]            | 0.455    | 0.799    |
| EIF4G1#eIF4G                  | 240 | 1.17 [1.03-1.33]            | 4.82E-02 | 0.291    |
| IGFBP2#IGFBP2                 | 240 | 1.16 [0.94-1.43]            | 0.252    | 0.643    |
| XRCC5#Ku80                    | 240 | 1.15 [1.06-1.25]            | 6.65E-03 | 0.093    |
| NFKB1#NF-kB-p65_pS536         | 240 | 1.15 [1.00-1.32]            | 0.104    | 0.494    |
| STAT5A#STAT5-alpha            | 240 | 1.15 [0.99-1.33]            | 0.123    | 0.532    |
| ERBB2#HER2                    | 240 | 1.14 [0.97-1.34]            | 0.197    | 0.605    |
| INPP4B#INPP4B                 | 240 | 1.14 [0.96-1.36]            | 0.206    | 0.605    |
| EEF2#eEF2                     | 240 | 1.14 [1.05-1.24]            | 9.44E-03 | 0.117    |
| CCNE2#Cyclin_E2               | 240 | 1.13 [1.06-1.20]            | 1.10E-03 | 0.061    |
| EIF4EBP1#4E-BP1_pT70          | 240 | 1.12 [1.05-1.20]            | 6.61E-03 | 0.093    |
| PRKAA1#AMPK_pT172             | 240 | 1.12 [0.98-1.26]            | 0.151    | 0.570    |
| CCNE1#Cyclin_E1               | 240 | 1.12 [1.02-1.22]            | 4.17E-02 | 0.277    |
| GSK3A GSK3B#GSK3-alpha-beta   | 240 | 1.12 [1.03-1.22]            | 2.67E-02 | 0.221    |
| MSH2#MSH2                     | 240 | 1.12 [1.04-1.21]            | 1.39E-02 | 0.155    |
| RPS6#S6                       | 240 | 1.12 [0.99-1.26]            | 0.124    | 0.532    |
| RPS6#S6_pS240_S244            | 240 | 1.12 [0.96-1.30]            | 0.213    | 0.617    |
| EIF4EBP1#4E-BP1_pS65          | 240 | 1.11 [1.03-1.19]            | 1.67E-02 | 0.163    |
| ADAR#ADAR1                    | 240 | 1.11 [1.01-1.22]            | 0.0791   | 0.401    |
| PARP1#PARP1                   | 109 | 1.11 [0.86-1.44]            | 0.491    | 0.808    |
| PXN#Paxillin                  | 240 | 1.11 [1.03-1.19]            | 1.87E-02 | 0.174    |
| AKT1 AKT2 AKT3#Akt            | 240 | 1.10 [0.98-1.23]            | 0.169    | 0.580    |
| ANXA1#Annexin-1               | 240 | 1.10 [0.97-1.25]            | 0.2      | 0.605    |
| CDK1#CDK1                     | 240 | 1.09 [1.03-1.16]            | 1.68E-02 | 0.163    |
| LCK#Lck                       | 240 | 1.09 [0.99-1.21]            | 0.15     | 0.570    |
| PTEN#PTEN                     | 240 | 1.09 [0.99-1.20]            | 0.128    | 0.539    |
| TSC2#Tuberin                  | 240 | 1.09 [0.99-1.21]            | 0.154    | 0.570    |
| CDKN1B#p27_pT198              | 240 | 1.09 [1.03-1.14]            | 6.07E-03 | 0.093    |
| SQSTM1#p62-LCK-ligand         | 240 | 1.09 [0.89-1.32]            | 0.483    | 0.808    |
| PRKCB#PKC-pan_Betall_pS660    | 240 | 1.08 [0.98-1.18]            | 0.204    | 0.605    |
| EIF4E#eIF4E                   | 240 | 1.08 [1.02-1.14]            | 2.25E-02 | 0.193    |

| Gene#Prot                | CINSARC, High- vs. Low-risk |                    |          |         |
|--------------------------|-----------------------------|--------------------|----------|---------|
|                          | N                           | Odds ratio [95%CI] | p-value  | q-value |
| EIF4EBP1#4E-BP1_pT37_T46 | 240                         | 1.07 [0.91-1.26]   | 0.5      | 0.808   |
| TP53BP1#53BP1            | 240                         | 1.07 [0.94-1.21]   | 0.406    | 0.774   |
| RAF1#C-Raf               | 240                         | 1.07 [1.01-1.13]   | 4.15E-02 | 0.277   |
| EPPK1#EPPK1              | 240                         | 1.07 [0.81-1.41]   | 0.698    | 0.899   |
| RB1#Rb_pS807_S811        | 240                         | 1.07 [0.93-1.24]   | 0.422    | 0.774   |
| DIABLO#Smac              | 240                         | 1.07 [0.97-1.19]   | 0.263    | 0.643   |
| SMAD3#Smad3              | 240                         | 1.07 [1.01-1.13]   | 0.0535   | 0.313   |
| SRC#Src                  | 240                         | 1.07 [1.00-1.15]   | 0.103    | 0.494   |
| MTOR#mTOR                | 240                         | 1.07 [0.96-1.19]   | 0.279    | 0.662   |
| BRD4#BRD4                | 240                         | 1.06 [0.94-1.19]   | 0.418    | 0.774   |
| DVL3#Dvl3                | 240                         | 1.06 [1.00-1.13]   | 0.12     | 0.532   |
| JAK2#Jak2                | 240                         | 1.06 [0.97-1.14]   | 0.266    | 0.643   |
| PCNA#PCNA                | 240                         | 1.06 [0.99-1.14]   | 0.173    | 0.584   |
| RICTOR#Rictor            | 240                         | 1.06 [0.96-1.16]   | 0.312    | 0.718   |
| KIT#c-Kit                | 240                         | 1.06 [0.90-1.25]   | 0.564    | 0.835   |
| CASP3#Caspase-3          | 240                         | 1.05 [0.97-1.14]   | 0.333    | 0.728   |
| CCND1#Cyclin_D1          | 240                         | 1.05 [0.95-1.17]   | 0.427    | 0.774   |
| ERBB2#HER2_pY1248        | 240                         | 1.05 [0.94-1.19]   | 0.47     | 0.808   |
| PRDX1#PRDX1              | 240                         | 1.05 [0.98-1.12]   | 0.284    | 0.667   |
| RAD51#Rad51              | 240                         | 1.05 [0.99-1.12]   | 0.202    | 0.605   |
| RPTOR#Raptor             | 240                         | 1.05 [0.98-1.13]   | 0.263    | 0.643   |
| BAP1#Bap1-c-4            | 240                         | 1.04 [0.98-1.11]   | 0.266    | 0.643   |
| CDK1#CDK1_pY15           | 240                         | 1.04 [0.95-1.12]   | 0.485    | 0.808   |
| ETS1#ETS-1               | 240                         | 1.04 [0.95-1.14]   | 0.442    | 0.788   |
| FOXO3#FOXO3a             | 240                         | 1.04 [0.97-1.11]   | 0.341    | 0.728   |
| G6PD#G6PD                | 240                         | 1.04 [0.95-1.13]   | 0.497    | 0.808   |
| RPS6#S6_pS235_S236       | 240                         | 1.04 [0.88-1.22]   | 0.702    | 0.899   |
| TP53#p53                 | 240                         | 1.04 [0.94-1.15]   | 0.505    | 0.808   |
| PRKAA1#AMPK_alpha        | 240                         | 1.03 [0.95-1.11]   | 0.577    | 0.835   |
| MYH9#Myosin-IIa          | 218                         | 1.03 [0.95-1.11]   | 0.597    | 0.835   |
| MYH9#Myosin-IIa_pS1943   | 240                         | 1.03 [0.93-1.15]   | 0.626    | 0.857   |
| PIK3CA #PI3K-p110-alpha  | 240                         | 1.03 [0.98-1.08]   | 0.396    | 0.768   |
| STMN1#Stathmin           | 240                         | 1.03 [0.96-1.10]   | 0.499    | 0.808   |
| YBX1#YB-1                | 240                         | 1.03 [0.95-1.12]   | 0.551    | 0.826   |
| MYC#c-Myc                | 240                         | 1.03 [0.94-1.13]   | 0.599    | 0.835   |
| BRCA2#BRCA2              | 240                         | 1.02 [0.97-1.07]   | 0.486    | 0.808   |
| ITGA2#CD49b              | 240                         | 1.02 [0.94-1.10]   | 0.724    | 0.902   |
| COG3#COG3                | 240                         | 1.02 [0.92-1.14]   | 0.755    | 0.926   |
| CHEK2#Chk2               | 240                         | 1.02 [0.92-1.14]   | 0.718    | 0.901   |
| CLDN7#Claudin-7          | 240                         | 1.02 [0.85-1.22]   | 0.869    | 0.952   |
| GUSP4#DUSP4              | 240                         | 1.02 [0.85-1.22]   | 0.882    | 0.955   |
| GAB2#GAB2                | 240                         | 1.02 [0.88-1.19]   | 0.814    | 0.931   |
| ERBB3#HER3               | 240                         | 1.02 [0.92-1.13]   | 0.784    | 0.930   |
| SERPINE1#PAI-1           | 240                         | 1.02 [0.88-1.19]   | 0.824    | 0.933   |
| RICTOR#Rictor_pT1135     | 240                         | 1.02 [0.96-1.09]   | 0.516    | 0.811   |
| STAT3#STAT3_pY705        | 240                         | 1.02 [0.94-1.11]   | 0.661    | 0.883   |
| SRC#Src_pY527            | 240                         | 1.02 [0.89-1.17]   | 0.781    | 0.930   |
| TIGAR#TIGAR              | 240                         | 1.02 [0.97-1.07]   | 0.57     | 0.835   |
| MAPK14#p38_MAPK          | 240                         | 1.02 [0.96-1.09]   | 0.549    | 0.826   |
| MAPK14#p38_pT180_Y182    | 240                         | 1.02 [0.90-1.16]   | 0.809    | 0.930   |
| ARID1A#ARID1A            | 240                         | 1.01 [0.94-1.08]   | 0.855    | 0.945   |
| AXL#Axl                  | 218                         | 1.01 [0.94-1.09]   | 0.808    | 0.930   |
| BRAF#B-Raf               | 240                         | 1.01 [0.88-1.16]   | 0.927    | 0.980   |
| PECAM1#CD31              | 240                         | 1.01 [0.93-1.09]   | 0.912    | 0.973   |
| MAPK1#ERK2               | 240                         | 1.01 [0.93-1.10]   | 0.804    | 0.930   |
| CDH3#P-Cadherin          | 240                         | 1.01 [0.95-1.08]   | 0.738    | 0.915   |
| PEA15#PEA15_pS116        | 240                         | 1.01 [0.91-1.11]   | 0.917    | 0.974   |

| Gene#Prot               | CINSARC, High- vs. Low-risk |                    |         |         |
|-------------------------|-----------------------------|--------------------|---------|---------|
|                         | N                           | Odds ratio [95%CI] | p-value | q-value |
| SRC#Src_pY416           | 240                         | 1.01 [0.92-1.11]   | 0.846   | 0.945   |
| TGM2#Transglutaminase   | 240                         | 1.01 [0.94-1.08]   | 0.795   | 0.930   |
| MET#c-Met_pY1235        | 240                         | 1.01 [0.95-1.07]   | 0.856   | 0.945   |
| CDKN1B#p27              | 240                         | 1.01 [0.92-1.10]   | 0.902   | 0.967   |
| CDKN1B#p27_pT157        | 240                         | 1.01 [0.97-1.06]   | 0.578   | 0.835   |
| AR#AR                   | 240                         | 1.00 [0.85-1.18]   | 0.998   | 0.985   |
| BAD#Bad_pS112           | 240                         | 1.00 [0.93-1.07]   | 0.977   | 0.985   |
| BAK1#Bak                | 240                         | 1.00 [0.93-1.08]   | 0.993   | 0.985   |
| BECN1#Beclin            | 240                         | 1.00 [0.94-1.06]   | 0.95    | 0.985   |
| BCL2L11#Bim             | 240                         | 1.00 [0.88-1.14]   | 0.991   | 0.985   |
| DPP4#CD26               | 240                         | 1.00 [0.94-1.06]   | 0.964   | 0.985   |
| CHEK2#Chk2_pT68         | 240                         | 1.00 [0.91-1.10]   | 0.97    | 0.985   |
| FOXO3#FOXO3a_pS318_S321 | 240                         | 1.00 [0.96-1.05]   | 0.855   | 0.945   |
| MAP2K1#MEK1             | 240                         | 1.00 [0.92-1.09]   | 0.968   | 0.985   |
| NF2#NF2                 | 240                         | 1.00 [0.93-1.07]   | 0.958   | 0.985   |
| PRKCA #PKC-alpha_pS657  | 240                         | 1.00 [0.93-1.08]   | 0.974   | 0.985   |
| PRKCD#PKC-delta_pS664   | 240                         | 1.00 [0.96-1.04]   | 0.98    | 0.985   |
| SMAD1#Smad1             | 240                         | 1.00 [0.95-1.06]   | 0.98    | 0.985   |
| XBP1#XBP1               | 240                         | 1.00 [0.93-1.07]   | 0.998   | 0.985   |
| MTOR#mTOR_pS2448        | 240                         | 1.00 [0.92-1.08]   | 0.963   | 0.985   |
| ARAF#A-Raf_pS299        | 240                         | 0.99 [0.93-1.05]   | 0.777   | 0.930   |
| MS4A1#CD20              | 240                         | 0.99 [0.94-1.05]   | 0.874   | 0.952   |
| CASP8#Caspase-8         | 240                         | 0.99 [0.94-1.05]   | 0.822   | 0.933   |
| CHEK1#Chk1_pS296        | 240                         | 0.99 [0.93-1.06]   | 0.875   | 0.952   |
| CHEK1#Chk1_pS345        | 240                         | 0.99 [0.94-1.05]   | 0.793   | 0.930   |
| EGFR#EGFR               | 240                         | 0.99 [0.94-1.05]   | 0.76    | 0.926   |
| NRAS#N-Ras              | 240                         | 0.99 [0.93-1.04]   | 0.674   | 0.895   |
| NDRG1#NDRG1_pT346       | 240                         | 0.99 [0.84-1.17]   | 0.96    | 0.985   |
| SRSF1#SF2               | 240                         | 0.99 [0.95-1.04]   | 0.757   | 0.926   |
| SNAI1#Snail             | 240                         | 0.99 [0.93-1.04]   | 0.69    | 0.899   |
| TSC2#Tuberin_pT1462     | 240                         | 0.99 [0.91-1.08]   | 0.898   | 0.967   |
| XRCC1#XRCC1             | 240                         | 0.99 [0.94-1.04]   | 0.679   | 0.896   |
| BIRC2 #cIAP             | 240                         | 0.99 [0.94-1.05]   | 0.837   | 0.943   |
| ATM#ATM                 | 240                         | 0.98 [0.87-1.11]   | 0.803   | 0.930   |
| BAX#Bax                 | 240                         | 0.98 [0.91-1.05]   | 0.616   | 0.848   |
| EGFR#EGFR_pY1068        | 240                         | 0.98 [0.88-1.08]   | 0.709   | 0.899   |
| EGFR#EGFR_pY1173        | 240                         | 0.98 [0.92-1.05]   | 0.661   | 0.883   |
| ERCC1#ERCC1             | 240                         | 0.98 [0.94-1.03]   | 0.585   | 0.835   |
| STK11#LKB1              | 240                         | 0.98 [0.94-1.02]   | 0.466   | 0.808   |
| ERRF1#MIG-6             | 240                         | 0.98 [0.93-1.03]   | 0.445   | 0.788   |
| PARP1#PARP_cleaved      | 240                         | 0.98 [0.93-1.03]   | 0.525   | 0.819   |
| SHC1#Shc_pY317          | 240                         | 0.98 [0.90-1.05]   | 0.595   | 0.835   |
| WWTR1#TAZ               | 240                         | 0.98 [0.92-1.04]   | 0.599   | 0.835   |
| EEF2K#eEF2K             | 240                         | 0.98 [0.88-1.09]   | 0.771   | 0.930   |
| CDKN2A#p16_INK4a        | 240                         | 0.98 [0.85-1.12]   | 0.774   | 0.930   |
| RPS6KB1#p70S6K_pT389    | 240                         | 0.98 [0.90-1.06]   | 0.66    | 0.883   |
| YWHAB#14-3-3_beta       | 240                         | 0.97 [0.92-1.02]   | 0.26    | 0.643   |
| YWHAE#14-3-3_epsilon    | 240                         | 0.97 [0.93-1.01]   | 0.259   | 0.643   |
| BRAF#B-Raf_pS445        | 240                         | 0.97 [0.87-1.09]   | 0.691   | 0.899   |
| BCL2L1#Bcl-xL           | 240                         | 0.97 [0.92-1.03]   | 0.42    | 0.774   |
| BID#Bid                 | 240                         | 0.97 [0.91-1.04]   | 0.504   | 0.808   |
| RAF1#C-Raf_pS338        | 240                         | 0.97 [0.92-1.02]   | 0.392   | 0.767   |
| CHEK1#Chk1              | 240                         | 0.97 [0.91-1.02]   | 0.319   | 0.726   |
| GATA6#GATA6             | 218                         | 0.97 [0.90-1.06]   | 0.592   | 0.835   |
| GSK3A GSK3B#GSK3_pS9    | 240                         | 0.97 [0.83-1.13]   | 0.719   | 0.901   |
| NRG1#Heregulin          | 240                         | 0.97 [0.92-1.03]   | 0.439   | 0.788   |
| MRE11A#Mre11            | 240                         | 0.97 [0.91-1.03]   | 0.424   | 0.774   |

| Gene#Prot                            | CINSARC, High- vs. Low-risk |                    |          |         |
|--------------------------------------|-----------------------------|--------------------|----------|---------|
|                                      | N                           | Odds ratio [95%CI] | p-value  | q-value |
| NOTCH1#Notch1                        | 240                         | 0.97 [0.93-1.02]   | 0.322    | 0.726   |
| PDK1#PDK1_pS241                      | 240                         | 0.97 [0.90-1.05]   | 0.547    | 0.826   |
| PEA15#PEA15                          | 240                         | 0.97 [0.91-1.03]   | 0.345    | 0.728   |
| AKT1S1#PRAS40_pT246                  | 240                         | 0.97 [0.91-1.02]   | 0.334    | 0.728   |
| RB1#Rb                               | 240                         | 0.97 [0.91-1.04]   | 0.484    | 0.808   |
| SMAD4#Smad4                          | 240                         | 0.97 [0.93-1.02]   | 0.349    | 0.728   |
| ARAF#A-Raf                           | 240                         | 0.96 [0.90-1.03]   | 0.375    | 0.749   |
| ANXA7#Annexin_VII                    | 240                         | 0.96 [0.91-1.01]   | 0.219    | 0.626   |
| ERBB3#HER3_pY1289                    | 240                         | 0.96 [0.91-1.02]   | 0.235    | 0.643   |
| IRF1#IRF-1                           | 240                         | 0.96 [0.91-1.01]   | 0.167    | 0.580   |
| COPS5#JAB1                           | 240                         | 0.96 [0.91-1.02]   | 0.237    | 0.643   |
| CDH2#N-Cadherin                      | 240                         | 0.96 [0.89-1.04]   | 0.414    | 0.774   |
| PIK3R1 PIK3R2#PI3K-p85               | 240                         | 0.96 [0.89-1.03]   | 0.341    | 0.728   |
| PRKCA #PKC-alpha                     | 240                         | 0.96 [0.90-1.02]   | 0.262    | 0.643   |
| RAB25#Rab25                          | 240                         | 0.96 [0.87-1.06]   | 0.507    | 0.808   |
| SETD2#SETD2                          | 240                         | 0.96 [0.91-1.02]   | 0.261    | 0.643   |
| PTPN11#SHP-2_pY542                   | 240                         | 0.96 [0.89-1.04]   | 0.388    | 0.766   |
| YAP1#YAP_pS127                       | 240                         | 0.96 [0.85-1.08]   | 0.552    | 0.826   |
| ABL1#c-Abl                           | 240                         | 0.96 [0.91-1.01]   | 0.151    | 0.570   |
| RPS6KA1#p90RSK_pT359_S363            | 240                         | 0.96 [0.91-1.03]   | 0.334    | 0.728   |
| ACVRL1#ACVRL1                        | 240                         | 0.95 [0.89-1.01]   | 0.14     | 0.570   |
| ESR1#ER-alpha_pS118                  | 240                         | 0.95 [0.84-1.08]   | 0.533    | 0.826   |
| GSK3A GSK3B#GSK3-alpha-beta_pS21_S35 | 240                         | 0.95 [0.82-1.10]   | 0.572    | 0.835   |
| MAPK9#JNK2                           | 240                         | 0.95 [0.87-1.03]   | 0.267    | 0.643   |
| MAP2K1#MEK1_pS217_S221               | 240                         | 0.95 [0.88-1.03]   | 0.295    | 0.685   |
| YAP1#YAP                             | 240                         | 0.95 [0.88-1.03]   | 0.346    | 0.728   |
| YBX1#YB-1_pS102                      | 240                         | 0.95 [0.88-1.01]   | 0.176    | 0.584   |
| MET#c-Met                            | 240                         | 0.95 [0.90-1.01]   | 0.166    | 0.580   |
| BCL2A1#Bcl2A1                        | 240                         | 0.94 [0.86-1.02]   | 0.202    | 0.605   |
| CAV1#Caveolin-1                      | 240                         | 0.94 [0.74-1.20]   | 0.694    | 0.899   |
| PARK7#DJ-1                           | 240                         | 0.94 [0.87-1.02]   | 0.193    | 0.605   |
| CDH1#E-Cadherin                      | 240                         | 0.94 [0.72-1.23]   | 0.709    | 0.899   |
| GATA3#GATA3                          | 240                         | 0.94 [0.78-1.14]   | 0.607    | 0.841   |
| IGFR1#IGF1R_pY1135_Y1136             | 240                         | 0.94 [0.89-1.00]   | 0.0823   | 0.408   |
| IRS1#IRS1                            | 240                         | 0.94 [0.87-1.03]   | 0.268    | 0.643   |
| RPS6KA1#p90RSK                       | 240                         | 0.94 [0.87-1.01]   | 0.181    | 0.585   |
| DIRAS3#DIRAS3                        | 240                         | 0.93 [0.86-0.99]   | 0.0777   | 0.401   |
| ESR1#ER-alpha                        | 240                         | 0.93 [0.69-1.23]   | 0.657    | 0.883   |
| PDK1#PDK1                            | 240                         | 0.93 [0.88-0.98]   | 2.03E-02 | 0.181   |
| JUN#c-Jun_pS73                       | 240                         | 0.93 [0.88-0.98]   | 3.14E-02 | 0.242   |
| CDKN1A#p21                           | 240                         | 0.93 [0.86-1.01]   | 0.149    | 0.570   |
| BCL2#Bcl-2                           | 240                         | 0.92 [0.77-1.09]   | 0.416    | 0.774   |
| RAB11A RAB11B#Rab11                  | 240                         | 0.91 [0.82-1.02]   | 0.159    | 0.572   |
| CTNNB1#beta-Catenin                  | 240                         | 0.91 [0.77-1.07]   | 0.356    | 0.735   |
| PREX1#PREX1                          | 240                         | 0.90 [0.73-1.10]   | 0.373    | 0.749   |
| HSPA1A#HSP70                         | 240                         | 0.89 [0.71-1.11]   | 0.376    | 0.749   |
| AKT1 AKT2 AKT3#Akt_pT308             | 240                         | 0.88 [0.77-1.02]   | 0.15     | 0.570   |
| FN1#Fibronectin                      | 240                         | 0.88 [0.73-1.05]   | 0.242    | 0.643   |
| RAD50#Rad50                          | 240                         | 0.88 [0.83-0.94]   | 1.71E-03 | 0.063   |
| CASP9#Caspase-9                      | 15                          | 0.87 [0.60-1.25]   | 0.537    | 0.826   |
| COL6A1#Collagen_VI                   | 240                         | 0.87 [0.68-1.12]   | 0.359    | 0.735   |
| ERCC5#ERCC5                          | 240                         | 0.87 [0.81-0.94]   | 2.17E-03 | 0.063   |
| MAPK8#JNK_pT183_pY185                | 240                         | 0.86 [0.79-0.93]   | 2.56E-03 | 0.063   |
| KDR#VEGFR2                           | 240                         | 0.86 [0.75-0.99]   | 0.0725   | 0.385   |
| PDCD4#PDCD4                          | 240                         | 0.85 [0.70-1.03]   | 0.156    | 0.570   |
| AKT1 AKT2 AKT3#Akt_pS473             | 240                         | 0.83 [0.68-1.01]   | 0.116    | 0.532   |
| MAPK1 MAPK3#MAPK_pT202_Y204          | 240                         | 0.79 [0.66-0.95]   | 3.46E-02 | 0.257   |

| Gene#Prot            | CINSARC, High- vs. Low-risk |                    |          |         |
|----------------------|-----------------------------|--------------------|----------|---------|
|                      | N                           | Odds ratio [95%CI] | p-value  | q-value |
| CTNNA1#alpha-Catenin | 22                          | 0.74 [0.60-0.93]   | 4.22E-02 | 0.277   |
| PGR#PR               | 240                         | 0.66 [0.45-0.96]   | 0.0675   | 0.376   |

Supplementary Table 10: List of breast cancer data sets included in the study

| Reference                                    | Source of data                                                                                                                    | N° of samples | Technological platform   | N° of probe sets | N° of samples | N° of non-redundant non-metastatic, non-inflammatory, primary, invasive breast cancers | N° of non-redundant non-metastatic, non-inflammatory, primary, invasive breast cancers treated with primary surgery and with clinico-pathological annotations including survival |
|----------------------------------------------|-----------------------------------------------------------------------------------------------------------------------------------|---------------|--------------------------|------------------|---------------|----------------------------------------------------------------------------------------|----------------------------------------------------------------------------------------------------------------------------------------------------------------------------------|
| van de Vijver et al., NEJM 2002              | <a href="http://microarray-pubs.stanford.edu/wound_NKI/">http://microarray-pubs.stanford.edu/wound_NKI/</a>                       | 295           | Agilent Hu25K            | 25K              | 254           | 254                                                                                    | 254                                                                                                                                                                              |
| vant Veer et al., Nature 2002                | <a href="http://www.rii.com/publications/2002/vantveer.html">http://www.rii.com/publications/2002/vantveer.html</a>               | 117           | Agilent Hu25K            | 25K              | 117           | 117                                                                                    | 97                                                                                                                                                                               |
| Expression Project for Oncology (expO), 2005 | <a href="https://expo.intgen.org/geo">https://expo.intgen.org/geo</a>                                                             | 348           | Affymetrix U133 Plus 2.0 | 54K              | 348           | 342                                                                                    |                                                                                                                                                                                  |
| Färmer P et al., Oncogene 2005               | GEO: GSE2109                                                                                                                      |               |                          |                  |               |                                                                                        |                                                                                                                                                                                  |
| Minn AJ et al., Nature 2005                  | GEO: GSE1561                                                                                                                      | 49            | Affymetrix U133A         | 22K              | 49            | 49                                                                                     |                                                                                                                                                                                  |
| Wang Y et al., Lancet 2005                   | GEO: GSE2603                                                                                                                      | 99            | Affymetrix U133A         | 22K              | 99            | 99                                                                                     | 82                                                                                                                                                                               |
| Hess KR et al., J Clin Oncol 2006            | MDA133                                                                                                                            | 133           | Affymetrix U133A         | 22K              | 131           | 131                                                                                    |                                                                                                                                                                                  |
| Ishina et al., Cancer Res 2006               | GEO: GSE4922, GSE1456                                                                                                             | 448           | Affymetrix U133 A+B      | 2x22K            | 448           | 448                                                                                    | 406                                                                                                                                                                              |
| Sotiriou C et al., J Natl Cancer Inst 2006   | GEO: GSE2990                                                                                                                      | 189           | Affymetrix U133A         | 22K              | 80            | 80                                                                                     | 80                                                                                                                                                                               |
| Bonnefoi et al., Lancet Oncol 2007           | GEO: GSE6861, GSE4779                                                                                                             | 161           | Affymetrix X3P           | 61K              | 125           | 125                                                                                    |                                                                                                                                                                                  |
| Desmedt C et al., Clin Cancer Res 2007       | GEO: GSE7390                                                                                                                      | 198           | Affymetrix U133A         | 22K              | 154           | 154                                                                                    | 154                                                                                                                                                                              |
| Klein A et al., Int J Cancer 2007            | GEO: GSE6596                                                                                                                      | 26            | Affymetrix U133A         | 22K              | 24            | 20                                                                                     |                                                                                                                                                                                  |
| Marty et al., Breast Cancer Res 2008         | GEO: GSE13787                                                                                                                     | 23            | Affymetrix U133 Plus 2.0 | 54K              | 23            | 23                                                                                     |                                                                                                                                                                                  |
| Merritt WM et al., N Engl J Med 2008         | Array Express: E-MTAB-158                                                                                                         | 130           | Affymetrix U133AAofAv2   | 23K              | 130           | 125                                                                                    | 119                                                                                                                                                                              |
| Schmidt M et al., Cancer Res 2008            | GEO: GSE11121                                                                                                                     | 200           | Affymetrix U133A         | 22K              | 200           | 200                                                                                    | 200                                                                                                                                                                              |
| Yu K et al., PLoS Genet 2008                 | GEO: GSE5364                                                                                                                      | 196           | Affymetrix U133A         | 22K              | 183           | 183                                                                                    |                                                                                                                                                                                  |
| Bos et al., Nature 2009                      | GEO: GSE12276                                                                                                                     | 204           | AffymetrixU133 Plus 2.0  | 54K              | 204           | 204                                                                                    | 196                                                                                                                                                                              |
| Hoefflich et al., Clin Cancer Res 2009       | GEO: GSE12763                                                                                                                     | 30            | Affymetrix U133 Plus 2.0 | 54K              | 30            | 30                                                                                     |                                                                                                                                                                                  |
| Zhang Y et al., Breast Cancer Res Treat 2009 | GEO: GSE12093                                                                                                                     | 136           | Affymetrix U133A         | 22K              | 136           | 136                                                                                    | 136                                                                                                                                                                              |
| Miller WR et al., Breast Cancer Res 2010     | GEO: GSE5462                                                                                                                      | 116           | Affymetrix U133A         | 22K              | 116           | 116                                                                                    |                                                                                                                                                                                  |
| Barry et al., J Clin Oncol 2010              | GEO: GSE23593                                                                                                                     | 50            | Affymetrix U133 Plus 2.0 | 54K              | 50            | 50                                                                                     |                                                                                                                                                                                  |
| Korde et al., Breast Cancer Res Treat 2010   | GEO: GSE18728                                                                                                                     | 61            | Affymetrix U133 Plus 2.0 | 54K              | 61            | 61                                                                                     |                                                                                                                                                                                  |
| Prat A et al., Breast Cancer Res 2010        | GEO: GSE18229                                                                                                                     | 337           | Agilent Hu25K            | 25K              | 264           | 264                                                                                    | 235                                                                                                                                                                              |
| Silver et al., J Clin Oncol 2010             | GEO: GSE18864                                                                                                                     | 84            | Affymetrix U133 Plus 2.0 | 54K              | 84            | 84                                                                                     |                                                                                                                                                                                  |
| Tabchy A et al., Clin Cancer Res 2010        | GEO: GSE20271                                                                                                                     | 178           | Affymetrix U133A         | 22K              | 178           | 178                                                                                    |                                                                                                                                                                                  |
| Jonsson et al., Breast Cancer Res 2010       | GEO: GSE22133                                                                                                                     | 359           | Swegene H_v2.1.1 55K     | 55K              | 346           | 346                                                                                    | 339                                                                                                                                                                              |
| Chen et al., Breast Cancer Res Treat 2010    | GEO: GSE10780                                                                                                                     | 185           | Affymetrix U133 Plus 2.0 | 54K              | 42            | 42                                                                                     |                                                                                                                                                                                  |
| Popovici V et al., Breast Cancer Res 2010    | GEO: GSE20194                                                                                                                     | 278           | Affymetrix U133A         | 22K              | 91            | 91                                                                                     |                                                                                                                                                                                  |
| Iwamoto T et al., J Natl Cancer Inst 2011    | GEO: GSE22093, GSE22597                                                                                                           | 247           | Affymetrix U133A         | 22K              | 100           | 100                                                                                    |                                                                                                                                                                                  |
| Desmedt et al., J Clin Oncol 2011            | GEO: GSE16446                                                                                                                     | 120           | Affymetrix U133 Plus 2.0 | 54K              | 120           | 120                                                                                    |                                                                                                                                                                                  |
| Guedj et al., Oncogene 2011                  | Array Express: E-MTAB-365                                                                                                         | 537           | Affymetrix U133 Plus 2.0 | 54K              | 452           | 452                                                                                    | 157                                                                                                                                                                              |
| Hatzis C et al., JAMA 2011                   | GEO: GSE25066                                                                                                                     | 508           | Affymetrix U133A         | 22K              | 504           | 504                                                                                    |                                                                                                                                                                                  |
| Sabatier R et al., PLoS One 2011             | GEO: GSE31448                                                                                                                     | 353           | Affymetrix U133 Plus 2.0 | 54K              | 286           | 280                                                                                    | 280                                                                                                                                                                              |
| TCGA, Nature 2012                            | TCGA Data Portal - BRCA -                                                                                                         | 1215          | Illumina, RNAseq V2      | 20K              | 1092          | 1071                                                                                   | 1070                                                                                                                                                                             |
| Ellis et al., Nature 2012                    | GEO: GSE29442, GSE35186                                                                                                           | 201           | Agilent-014850 4x44K     | 44K              | 201           | 201                                                                                    |                                                                                                                                                                                  |
| Curtis et al., Nature 2012                   | <a href="https://www.cbioportal.org/study/summary?id=brca_metabric">https://www.cbioportal.org/study/summary?id=brca_metabric</a> | 2136          | Illumina HT 12           | 49K              | 1974          | 1964                                                                                   | 1944                                                                                                                                                                             |
| <b>TOTAL</b>                                 |                                                                                                                                   | <b>10233</b>  |                          |                  | <b>8982</b>   | <b>8930</b>                                                                            | <b>6035</b>                                                                                                                                                                      |
